# Supplementary material
Source: publisher figshare collection journal article supplement (https://acs.figshare.com/ndownloader/files/3902257)
Supplement: Supplementary file 1 [file 3902257]

# New SCS- and SOS-MP2 coefficients fitted to semi-Coulombic systems

## Electronic Supporting Information

Jason Rigby and Ekaterina Izgorodina

### Contents

|          |                                                    |            |
|----------|----------------------------------------------------|------------|
| <b>1</b> | <b>Molecular structures</b>                        | <b>3</b>   |
| <b>2</b> | <b>Raw correlation energies</b>                    | <b>3</b>   |
| 2.1      | CCSD(T)/CBS . . . . .                              | 3          |
| 2.2      | MP2 . . . . .                                      | 7          |
| 2.2.1    | KSV(P) basis set . . . . .                         | 7          |
| 2.2.2    | KSVP basis set . . . . .                           | 12         |
| 2.2.3    | KTZVP basis set . . . . .                          | 17         |
| 2.2.4    | KTZVPP basis set . . . . .                         | 22         |
| 2.2.5    | CCD basis set . . . . .                            | 27         |
| 2.2.6    | JCCD basis set . . . . .                           | 32         |
| 2.2.7    | ACCD basis set . . . . .                           | 37         |
| 2.2.8    | CCT basis set . . . . .                            | 42         |
| 2.2.9    | MCCT basis set . . . . .                           | 47         |
| 2.2.10   | JCCT basis set . . . . .                           | 52         |
| 2.2.11   | ACCT basis set . . . . .                           | 57         |
| 2.2.12   | CCQ basis set . . . . .                            | 62         |
| 2.2.13   | ACCQ basis set . . . . .                           | 67         |
| 2.2.14   | ACC5 basis set . . . . .                           | 72         |
| 2.2.15   | CC(D+d) basis set . . . . .                        | 73         |
| 2.2.16   | ACC(D+d) basis set . . . . .                       | 78         |
| 2.2.17   | CC(T+d) basis set . . . . .                        | 83         |
| 2.2.18   | ACC(T+d) basis set . . . . .                       | 88         |
| 2.3      | CBS extrapolated MP2 . . . . .                     | 93         |
| 2.3.1    | D→T . . . . .                                      | 93         |
| 2.3.2    | augmented D→T . . . . .                            | 98         |
| 2.3.3    | T→Q . . . . .                                      | 103        |
| 2.3.4    | augmented T→Q . . . . .                            | 108        |
| 2.3.5    | augmented Q→5 . . . . .                            | 113        |
| <b>3</b> | <b>Multiple linear regression diagnostic plots</b> | <b>114</b> |
| 3.1      | SCS-MP2 regression . . . . .                       | 114        |
| 3.1.1    | KSV(P) basis set . . . . .                         | 114        |
| 3.1.2    | KSVP basis set . . . . .                           | 118        |
| 3.1.3    | KTZVP basis set . . . . .                          | 122        |
| 3.1.4    | KTZVPP basis set . . . . .                         | 126        |
| 3.1.5    | CCD basis set . . . . .                            | 130        |
| 3.1.6    | JCCD basis set . . . . .                           | 134        |
| 3.1.7    | ACCD basis set . . . . .                           | 138        |
| 3.1.8    | CCT basis set . . . . .                            | 142        |
| 3.1.9    | MCCT basis set . . . . .                           | 146        |
| 3.1.10   | JCCT basis set . . . . .                           | 150        |



|        |                              |     |
|--------|------------------------------|-----|
| 3.1.11 | ACCT basis set . . . . .     | 154 |
| 3.1.12 | CCQ basis set . . . . .      | 158 |
| 3.1.13 | ACCQ basis set . . . . .     | 162 |
| 3.1.14 | CC(D+d) basis set . . . . .  | 166 |
| 3.1.15 | ACC(D+d) basis set . . . . . | 170 |
| 3.1.16 | CC(T+d) basis set . . . . .  | 174 |
| 3.1.17 | ACC(T+d) basis set . . . . . | 178 |
| 3.1.18 | CBS(aug) basis set . . . . . | 182 |
| 3.1.19 | CBS basis set . . . . .      | 186 |
| 3.2    | SOS-MP2 regression . . . . . | 190 |
| 3.2.1  | KSV(P) basis set . . . . .   | 190 |
| 3.2.2  | KSVP basis set . . . . .     | 194 |
| 3.2.3  | KTZVP basis set . . . . .    | 198 |
| 3.2.4  | KTZVPP basis set . . . . .   | 202 |
| 3.2.5  | CCD basis set . . . . .      | 206 |
| 3.2.6  | JCCD basis set . . . . .     | 210 |
| 3.2.7  | ACCD basis set . . . . .     | 214 |
| 3.2.8  | CCT basis set . . . . .      | 218 |
| 3.2.9  | MCCT basis set . . . . .     | 222 |
| 3.2.10 | JCCT basis set . . . . .     | 226 |
| 3.2.11 | ACCT basis set . . . . .     | 230 |
| 3.2.12 | CCQ basis set . . . . .      | 234 |
| 3.2.13 | ACCQ basis set . . . . .     | 238 |
| 3.2.14 | CC(D+d) basis set . . . . .  | 242 |
| 3.2.15 | ACC(D+d) basis set . . . . . | 246 |
| 3.2.16 | CC(T+d) basis set . . . . .  | 250 |
| 3.2.17 | ACC(T+d) basis set . . . . . | 254 |
| 3.2.18 | CBS(aug) basis set . . . . . | 258 |
| 3.2.19 | CBS basis set . . . . .      | 262 |



# 1 Molecular structures

All 186 molecular structures used in this study are included as part of the ESI. Structures are in XYZ format and can be imported without modification into most molecular structure viewers (e.g. molten).

## 2 Raw correlation energies

All energies given in this section are in kJ/mol.

### 2.1 CCSD(T)/CBS

Table S 1: CCSD(T)/CBS benchmark energies

| ion pair       | CCSD(T)/CBS (kJ/mol) |
|----------------|----------------------|
| c1mim-bf4-p1   | -34.59261546         |
| c1mim-br-p1    | -45.4351599          |
| c1mim-br-p2    | -30.18904041         |
| c1mim-cl-p1    | -38.54406944         |
| c1mim-cl-p2    | -27.53587869         |
| c1mim-dca-p1   | -55.62964364         |
| c1mim-dca-p2   | -42.80619942         |
| c1mim-mes-p1   | -42.58176379         |
| c1mim-ntf2-p1  | -63.94076488         |
| c1mim-ntf2-p2  | -35.66836056         |
| c1mim-ntf2-p3  | -41.42927435         |
| c1mim-pf6-p1   | -36.27730776         |
| c1mim-tos-p1   | -41.00495655         |
| c1mpyr-bf4-p1  | -32.73700622         |
| c1mpyr-bf4-p2  | -30.32967875         |
| c1mpyr-br-p1   | -43.52216654         |
| c1mpyr-br-p2   | -41.84853766         |
| c1mpyr-cl-p1   | -37.77881609         |
| c1mpyr-cl-p2   | -36.97910415         |
| c1mpyr-dca-p1  | -39.69699754         |
| c1mpyr-dca-p2  | -43.21578964         |
| c1mpyr-dca-p3  | -39.67313144         |
| c1mpyr-dca-p4  | -41.81373462         |
| c1mpyr-mes-p1  | -38.32608329         |
| c1mpyr-mes-p2  | -34.06977254         |
| c1mpyr-ntf2-p1 | -43.54179243         |
| c1mpyr-ntf2-p2 | -34.67942323         |
| c1mpyr-ntf2-p3 | -42.40533035         |
| c1mpyr-ntf2-p5 | -36.00261195         |
| c1mpyr-pf6-p1  | -32.32693992         |
| c1mpyr-pf6-p2  | -30.11317134         |
| c1mpyr-tos-p1  | -36.43519628         |
| c1mpyr-tos-p2  | -32.12201707         |
| c2mim-bf4-p1   | -36.73997541         |
| c2mim-bf4-p2   | -34.23816261         |
| c2mim-br-p1    | -46.96958392         |
| c2mim-br-p2    | -33.41679387         |
| c2mim-br-p3    | -34.03038949         |
| c2mim-br-p4    | -46.47528589         |
| c2mim-cl-p1    | -40.32376459         |
| c2mim-cl-p2    | -29.61895395         |



|                |              |
|----------------|--------------|
| c2mim-cl-p3    | -30.49692589 |
| c2mim-cl-p4    | -39.32103516 |
| c2mim-dca-p1   | -56.76969959 |
| c2mim-dca-p2   | -53.82443785 |
| c2mim-dca-p3   | -56.92446007 |
| c2mim-dca-p4   | -54.24742256 |
| c2mim-dca-p5   | -55.69091435 |
| c2mim-dca-p6   | -55.79152719 |
| c2mim-mes-p1   | -47.44082118 |
| c2mim-mes-p2   | -43.14191336 |
| c2mim-ntf2-p1  | -70.03429014 |
| c2mim-ntf2-p2  | -45.32592844 |
| c2mim-ntf2-p3  | -44.542232   |
| c2mim-ntf2-p4  | -61.74520469 |
| c2mim-pf6-p1   | -40.05361175 |
| c2mim-pf6-p2   | -36.45021504 |
| c2mim-tos-p1   | -46.90862183 |
| c2mim-tos-p2   | -41.82852089 |
| c2mpyr-bf4-p1  | -33.19101064 |
| c2mpyr-bf4-p2  | -31.22033589 |
| c2mpyr-bf4-p3  | -30.93291425 |
| c2mpyr-br-p1   | -44.10413507 |
| c2mpyr-br-p2   | -42.82968237 |
| c2mpyr-br-p3   | -42.42933928 |
| c2mpyr-cl-p1   | -38.07097349 |
| c2mpyr-cl-p2   | -37.25865661 |
| c2mpyr-cl-p3   | -37.10314942 |
| c2mpyr-dca-p1  | -39.64286363 |
| c2mpyr-dca-p2  | -42.70233743 |
| c2mpyr-dca-p3  | -43.41796094 |
| c2mpyr-mes-p1  | -39.34294044 |
| c2mpyr-mes-p2  | -36.45470911 |
| c2mpyr-mes-p3  | -35.25750103 |
| c2mpyr-ntf2-p1 | -44.66575738 |
| c2mpyr-ntf2-p2 | -36.81403056 |
| c2mpyr-ntf2-p3 | -43.93645619 |
| c2mpyr-ntf2-p4 | -42.93683332 |
| c2mpyr-ntf2-p5 | -38.41662734 |
| c2mpyr-ntf2-p6 | -36.31547581 |
| c2mpyr-pf6-p1  | -32.50600536 |
| c2mpyr-pf6-p2  | -30.93111833 |
| c2mpyr-pf6-p3  | -30.55192422 |
| c2mpyr-tos-p1  | -37.61719676 |
| c2mpyr-tos-p2  | -34.89014986 |
| c3mim-bf4-p1   | -37.49525975 |
| c3mim-bf4-p2   | -36.3451419  |
| c3mim-br-p1    | -47.5197504  |
| c3mim-br-p2    | -33.72882238 |
| c3mim-br-p3    | -37.81795428 |
| c3mim-br-p4    | -47.72426404 |
| c3mim-cl-p1    | -40.69998126 |
| c3mim-cl-p2    | -29.73856445 |
| c3mim-cl-p3    | -33.26838878 |
| c3mim-cl-p4    | -40.10299595 |
| c3mim-dca-p1   | -57.54243619 |
| c3mim-dca-p2   | -58.90073928 |



|                |              |
|----------------|--------------|
| c3mim-dca-p3   | -51.04233752 |
| c3mim-dca-p4   | -59.86400879 |
| c3mim-dca-p5   | -56.9995504  |
| c3mim-dca-p6   | -55.86982765 |
| c3mim-mes-p1   | -49.60972472 |
| c3mim-mes-p2   | -43.52658976 |
| c3mim-pf6-p1   | -40.40495079 |
| c3mim-pf6-p2   | -36.52358571 |
| c3mim-tos-p1   | -49.50737807 |
| c3mim-tos-p2   | -46.81377536 |
| c3mpyr-bf4-p1  | -33.52206047 |
| c3mpyr-bf4-p2  | -31.37383379 |
| c3mpyr-bf4-p3  | -31.20056686 |
| c3mpyr-br-p1   | -44.81990349 |
| c3mpyr-br-p2   | -42.61336794 |
| c3mpyr-br-p3   | -43.04477435 |
| c3mpyr-cl-p1   | -38.44944844 |
| c3mpyr-cl-p2   | -37.43897787 |
| c3mpyr-cl-p3   | -37.38002336 |
| c3mpyr-dca-p1  | -40.61336734 |
| c3mpyr-dca-p2  | -42.67075368 |
| c3mpyr-dca-p3  | -38.60306656 |
| c3mpyr-dca-p4  | -41.51279878 |
| c3mpyr-dca-p5  | -43.30314499 |
| c3mpyr-mes-p1  | -39.98966323 |
| c3mpyr-mes-p2  | -36.66117682 |
| c3mpyr-mes-p3  | -35.96540876 |
| c3mpyr-ntf2-p1 | -46.65771109 |
| c3mpyr-ntf2-p2 | -36.4220815  |
| c3mpyr-ntf2-p3 | -44.1139107  |
| c3mpyr-ntf2-p4 | -44.78694929 |
| c3mpyr-ntf2-p5 | -38.3265928  |
| c3mpyr-ntf2-p6 | -37.77012701 |
| c3mpyr-pf6-p1  | -33.57132413 |
| c3mpyr-pf6-p2  | -30.85357007 |
| c3mpyr-pf6-p3  | -30.99116145 |
| c3mpyr-tos-p1  | -38.37123672 |
| c3mpyr-tos-p2  | -35.00884058 |
| c4mim-bf4-p1   | -37.95657694 |
| c4mim-bf4-p2   | -36.49994061 |
| c4mim-br-p1    | -48.25574338 |
| c4mim-br-p2    | -34.53499247 |
| c4mim-br-p3    | -39.33749419 |
| c4mim-br-p4    | -48.11103553 |
| c4mim-cl-p1    | -41.15425441 |
| c4mim-cl-p2    | -30.1827531  |
| c4mim-cl-p3    | -34.39107577 |
| c4mim-cl-p4    | -40.41146036 |
| c4mim-dca-p1   | -58.07943587 |
| c4mim-dca-p2   | -61.15918168 |
| c4mim-dca-p3   | -57.22230351 |
| c4mim-mes-p1   | -50.6537313  |
| c4mim-mes-p2   | -43.64231432 |
| c4mim-pf6-p1   | -42.57971105 |
| c4mim-pf6-p2   | -36.57442582 |
| c4mim-tos-p1   | -51.32876831 |



|               |              |
|---------------|--------------|
| c4mim-tos-p2  | -47.55323457 |
| c4mpyr-bf4-p1 | -33.61903072 |
| c4mpyr-bf4-p2 | -31.47678409 |
| c4mpyr-bf4-p3 | -31.40151882 |
| c4mpyr-br-p1  | -45.02527274 |
| c4mpyr-br-p2  | -42.81761782 |
| c4mpyr-br-p3  | -43.27885784 |
| c4mpyr-cl-p1  | -38.45244524 |
| c4mpyr-cl-p2  | -37.83424867 |
| c4mpyr-cl-p3  | -37.34728108 |
| c4mpyr-dca-p1 | -40.41750046 |
| c4mpyr-dca-p2 | -42.61530321 |
| c4mpyr-dca-p3 | -41.27105576 |
| c4mpyr-dca-p4 | -42.12580485 |
| c4mpyr-dca-p5 | -43.41471637 |
| c4mpyr-mes-p1 | -40.00125408 |
| c4mpyr-mes-p2 | -37.02600965 |
| c4mpyr-mes-p3 | -36.17194436 |
| c4mpyr-pf6-p1 | -33.66086331 |
| c4mpyr-pf6-p2 | -31.23716226 |
| c4mpyr-pf6-p3 | -31.20153379 |



## 2.2 MP2

### 2.2.1 KSV(P) basis set

Table S 2: Raw KSV(P) energies. Superscript \* indicates monomer calculated in the dimer basis set.

| ion pair       | E(int) | E(int) CP | E(dimer) SS | E(dimer) OS | E(A) SS | E(A) OS | E(B) SS | E(B) OS | E(A) SS* | E(A) OS* | E(B) SS* | E(B) OS* |
|----------------|--------|-----------|-------------|-------------|---------|---------|---------|---------|----------|----------|----------|----------|
| c1mim-bf4-p1   | -31.8  | -11.4     | -1263.8     | -3412.3     | -641.5  | -1824.3 | -609.8  | -1568.6 | -642.5   | -1827.1  | -615.1   | -1580.0  |
| c1mim-br-p1    | -33.5  | -17.5     | -855.0      | -2261.2     | -643.6  | -1833.8 | -196.3  | -408.9  | -644.5   | -1835.9  | -199.8   | -418.4   |
| c1mim-br-p2    | -20.8  | -9.5      | -850.0      | -2253.9     | -643.4  | -1834.5 | -196.3  | -408.9  | -643.7   | -1835.3  | -199.0   | -416.3   |
| c1mim-cl-p1    | -30.9  | -9.4      | -747.4      | -2101.1     | -643.4  | -1833.5 | -91.5   | -249.2  | -644.2   | -1835.2  | -96.6    | -263.1   |
| c1mim-cl-p2    | -21.9  | -6.2      | -745.0      | -2096.4     | -643.6  | -1835.2 | -91.5   | -249.2  | -643.9   | -1835.9  | -95.2    | -260.2   |
| c1mim-dca-p1   | -54.2  | -35.4     | -1193.9     | -3231.2     | -641.9  | -1825.5 | -528.2  | -1375.3 | -643.4   | -1829.3  | -532.6   | -1384.4  |
| c1mim-dca-p2   | -41.3  | -26.4     | -1188.3     | -3225.0     | -641.9  | -1826.8 | -527.9  | -1375.3 | -642.9   | -1829.3  | -531.4   | -1383.3  |
| c1mim-mes-p1   | -43.6  | -16.7     | -1252.3     | -3412.3     | -641.9  | -1825.1 | -591.6  | -1562.3 | -643.0   | -1827.8  | -599.3   | -1577.8  |
| c1mim-ntf2-p1  | -64.9  | -39.2     | -2565.1     | -6664.5     | -641.5  | -1824.5 | -1895.9 | -4802.8 | -642.8   | -1827.9  | -1902.8  | -4816.9  |
| c1mim-ntf2-p2  | -37.3  | -20.6     | -2553.7     | -6647.5     | -641.8  | -1826.6 | -1894.9 | -4800.6 | -642.5   | -1828.5  | -1899.3  | -4810.3  |
| c1mim-ntf2-p3  | -37.7  | -17.3     | -2554.3     | -6647.6     | -641.6  | -1825.3 | -1895.7 | -4801.7 | -642.4   | -1827.7  | -1901.3  | -4813.2  |
| c1mim-pf6-p1   | -35.8  | -13.6     | -1575.7     | -4205.9     | -641.5  | -1824.4 | -919.9  | -2359.9 | -642.3   | -1826.8  | -926.2   | -2372.6  |
| c1mim-tos-p1   | -40.6  | -14.5     | -1797.7     | -4832.8     | -641.7  | -1825.0 | -1138.3 | -2985.0 | -642.8   | -1827.8  | -1145.7  | -2999.8  |
| c1mpyr-bf4-p1  | -33.9  | -13.7     | -1211.9     | -3422.1     | -588.7  | -1834.7 | -609.5  | -1567.2 | -589.5   | -1836.9  | -614.8   | -1579.0  |
| c1mpyr-bf4-p2  | -30.7  | -12.7     | -1210.7     | -3420.4     | -588.8  | -1834.9 | -609.5  | -1567.2 | -589.6   | -1837.0  | -614.2   | -1577.6  |
| c1mpyr-br-p1   | -37.2  | -23.0     | -802.0      | -2265.6     | -589.2  | -1835.9 | -196.3  | -408.9  | -589.7   | -1837.1  | -199.7   | -418.0   |
| c1mpyr-br-p2   | -35.3  | -21.8     | -801.1      | -2264.9     | -589.2  | -1836.2 | -196.3  | -408.9  | -589.7   | -1837.4  | -199.5   | -417.6   |
| c1mpyr-cl-p1   | -37.1  | -18.0     | -695.8      | -2107.2     | -589.3  | -1836.0 | -91.5   | -249.2  | -589.6   | -1836.9  | -96.1    | -262.3   |
| c1mpyr-cl-p2   | -35.8  | -17.6     | -695.2      | -2106.8     | -589.3  | -1836.2 | -91.5   | -249.2  | -589.6   | -1837.1  | -95.9    | -261.8   |
| c1mpyr-dca-p1  | -38.7  | -24.6     | -1128.9     | -3216.1     | -589.1  | -1835.5 | -522.1  | -1359.6 | -589.9   | -1837.6  | -525.8   | -1367.2  |
| c1mpyr-dca-p2  | -43.0  | -27.6     | -1130.1     | -3219.0     | -589.0  | -1835.2 | -522.0  | -1359.9 | -590.0   | -1837.7  | -525.9   | -1367.9  |
| c1mpyr-dca-p3  | -38.3  | -24.4     | -1126.9     | -3217.5     | -588.7  | -1835.0 | -522.1  | -1360.3 | -589.5   | -1837.0  | -525.6   | -1367.9  |
| c1mpyr-dca-p4  | -41.3  | -27.0     | -1129.1     | -3217.9     | -588.7  | -1835.0 | -522.1  | -1359.9 | -589.6   | -1837.3  | -525.8   | -1367.4  |
| c1mpyr-mes-p1  | -43.2  | -17.2     | -1199.3     | -3423.4     | -588.7  | -1835.2 | -591.8  | -1563.9 | -589.5   | -1837.3  | -599.3   | -1579.4  |
| c1mpyr-mes-p2  | -38.6  | -15.5     | -1197.6     | -3421.3     | -588.9  | -1835.7 | -591.8  | -1563.9 | -589.8   | -1838.0  | -598.2   | -1577.4  |
| c1mpyr-ntf2-p1 | -48.8  | -28.6     | -2504.4     | -6665.7     | -588.9  | -1834.7 | -1894.9 | -4802.8 | -589.7   | -1836.9  | -1900.6  | -4814.3  |
| c1mpyr-ntf2-p2 | -37.8  | -19.1     | -2499.7     | -6657.4     | -588.7  | -1834.5 | -1894.6 | -4801.5 | -589.4   | -1836.4  | -1899.9  | -4812.3  |
| c1mpyr-ntf2-p3 | -47.4  | -27.9     | -2503.9     | -6664.7     | -588.9  | -1835.0 | -1894.8 | -4802.5 | -589.7   | -1837.1  | -1900.2  | -4813.6  |
| c1mpyr-ntf2-p5 | -39.0  | -19.4     | -2500.2     | -6658.0     | -588.9  | -1834.7 | -1894.5 | -4801.1 | -589.5   | -1836.6  | -1900.1  | -4812.5  |
| c1mpyr-pf6-p1  | -36.1  | -15.0     | -1523.3     | -4216.3     | -588.7  | -1834.6 | -920.0  | -2360.2 | -589.3   | -1836.3  | -926.1   | -2372.9  |
| c1mpyr-pf6-p2  | -33.4  | -13.9     | -1522.3     | -4215.0     | -588.7  | -1834.8 | -920.1  | -2360.3 | -589.3   | -1836.3  | -925.7   | -2372.1  |



$\infty$ 

|               |       |       |         |         |        |         |         |         |        |         |         |         |
|---------------|-------|-------|---------|---------|--------|---------|---------|---------|--------|---------|---------|---------|
| c1mpyr-tos-p1 | -39.7 | -14.3 | -1744.2 | -4843.0 | -588.7 | -1835.2 | -1137.8 | -2985.8 | -589.5 | -1837.3 | -1145.2 | -3000.8 |
| c1mpyr-tos-p2 | -34.8 | -12.0 | -1741.9 | -4840.6 | -588.8 | -1835.3 | -1137.8 | -2985.8 | -589.6 | -1837.2 | -1144.5 | -2999.2 |
| c2mim-bf4-p1  | -33.8 | -11.5 | -1348.2 | -3669.9 | -725.1 | -2080.8 | -609.8  | -1568.6 | -726.2 | -2083.7 | -615.6  | -1581.1 |
| c2mim-bf4-p2  | -31.4 | -11.3 | -1346.8 | -3668.0 | -724.7 | -2080.3 | -609.8  | -1568.6 | -725.7 | -2082.8 | -615.0  | -1579.9 |
| c2mim-br-p1   | -34.7 | -17.9 | -938.5  | -2518.3 | -726.7 | -2090.1 | -196.3  | -408.9  | -727.6 | -2092.2 | -200.0  | -419.0  |
| c2mim-br-p2   | -24.6 | -11.5 | -935.5  | -2513.8 | -727.3 | -2092.3 | -196.3  | -408.9  | -727.8 | -2093.4 | -199.4  | -417.3  |
| c2mim-br-p3   | -24.2 | -11.6 | -934.8  | -2512.9 | -726.9 | -2091.4 | -196.3  | -408.9  | -727.2 | -2092.3 | -199.4  | -417.2  |
| c2mim-br-p4   | -35.0 | -18.7 | -938.8  | -2518.9 | -726.9 | -2090.7 | -196.3  | -408.9  | -727.8 | -2092.8 | -199.9  | -418.6  |
| c2mim-cl-p1   | -32.4 | -9.8  | -831.2  | -2358.6 | -726.7 | -2090.0 | -91.5   | -249.2  | -727.4 | -2091.7 | -96.8   | -264.0  |
| c2mim-cl-p2   | -25.0 | -7.4  | -830.2  | -2356.0 | -727.6 | -2093.0 | -91.5   | -249.2  | -727.9 | -2093.9 | -95.7   | -261.4  |
| c2mim-cl-p3   | -24.8 | -7.2  | -829.6  | -2355.1 | -727.1 | -2092.1 | -91.5   | -249.2  | -727.3 | -2092.8 | -95.9   | -261.5  |
| c2mim-cl-p4   | -32.0 | -10.3 | -831.1  | -2358.7 | -726.7 | -2090.3 | -91.5   | -249.2  | -727.4 | -2092.1 | -96.7   | -263.3  |
| c2mim-dca-p1  | -57.2 | -38.2 | -1278.0 | -3489.4 | -725.0 | -2081.4 | -528.0  | -1375.7 | -726.5 | -2085.1 | -532.6  | -1385.0 |
| c2mim-dca-p2  | -53.3 | -35.1 | -1276.8 | -3486.8 | -725.2 | -2081.4 | -528.1  | -1375.5 | -726.5 | -2084.8 | -532.5  | -1384.5 |
| c2mim-dca-p3  | -57.2 | -37.9 | -1278.4 | -3489.1 | -725.0 | -2081.5 | -528.3  | -1375.5 | -726.5 | -2085.2 | -532.9  | -1385.0 |
| c2mim-dca-p4  | -54.2 | -36.3 | -1277.1 | -3487.2 | -725.1 | -2081.4 | -528.1  | -1375.5 | -726.5 | -2085.0 | -532.4  | -1384.1 |
| c2mim-dca-p5  | -54.5 | -35.6 | -1277.2 | -3487.3 | -725.0 | -2081.4 | -528.3  | -1375.3 | -726.6 | -2085.2 | -532.6  | -1384.5 |
| c2mim-dca-p6  | -54.7 | -36.1 | -1276.9 | -3487.4 | -725.0 | -2081.0 | -528.3  | -1375.4 | -726.4 | -2084.8 | -532.6  | -1384.5 |
| c2mim-mes-p1  | -49.0 | -19.6 | -1338.3 | -3671.8 | -725.6 | -2081.8 | -591.6  | -1562.2 | -726.7 | -2084.6 | -600.0  | -1579.2 |
| c2mim-mes-p2  | -44.8 | -17.5 | -1335.8 | -3668.9 | -725.0 | -2080.9 | -591.6  | -1562.4 | -726.1 | -2083.7 | -599.4  | -1578.1 |
| c2mim-ntf2-p1 | -70.8 | -42.1 | -2651.2 | -6924.3 | -725.1 | -2081.0 | -1895.8 | -4802.7 | -726.6 | -2084.7 | -1903.6 | -4818.5 |
| c2mim-ntf2-p2 | -48.1 | -26.5 | -2641.9 | -6911.2 | -725.3 | -2082.7 | -1895.3 | -4801.7 | -726.1 | -2084.9 | -1901.4 | -4814.3 |
| c2mim-ntf2-p3 | -41.4 | -18.8 | -2639.4 | -6905.8 | -725.0 | -2081.5 | -1895.7 | -4801.6 | -725.9 | -2084.0 | -1902.0 | -4814.6 |
| c2mim-ntf2-p4 | -61.1 | -36.1 | -2647.7 | -6919.3 | -725.0 | -2080.9 | -1896.4 | -4803.6 | -726.2 | -2084.2 | -1903.1 | -4817.3 |
| c2mim-pf6-p1  | -40.2 | -14.7 | -1660.9 | -4464.8 | -725.0 | -2080.8 | -919.9  | -2359.8 | -725.9 | -2083.3 | -927.2  | -2374.6 |
| c2mim-pf6-p2  | -36.1 | -14.0 | -1658.9 | -4461.9 | -724.7 | -2080.2 | -919.9  | -2359.9 | -725.5 | -2082.6 | -926.2  | -2372.6 |
| c2mim-tos-p1  | -47.3 | -17.8 | -1884.4 | -5093.1 | -725.5 | -2081.6 | -1138.3 | -2984.8 | -726.7 | -2084.6 | -1146.8 | -3001.7 |
| c2mim-tos-p2  | -42.1 | -15.4 | -1881.6 | -5089.5 | -725.0 | -2081.0 | -1138.3 | -2984.9 | -726.1 | -2083.7 | -1145.9 | -3000.1 |
| c2mpyr-bf4-p1 | -34.9 | -14.1 | -1296.7 | -3681.1 | -673.1 | -2093.1 | -609.5  | -1567.2 | -674.0 | -2095.4 | -615.0  | -1579.3 |
| c2mpyr-bf4-p2 | -32.7 | -13.2 | -1296.3 | -3680.4 | -673.5 | -2093.6 | -609.5  | -1567.3 | -674.4 | -2096.0 | -614.6  | -1578.6 |
| c2mpyr-bf4-p3 | -31.8 | -13.2 | -1295.6 | -3679.6 | -673.3 | -2093.5 | -609.5  | -1567.2 | -674.1 | -2095.6 | -614.3  | -1578.0 |
| c2mpyr-br-p1  | -38.3 | -23.7 | -886.8  | -2524.5 | -673.7 | -2094.2 | -196.3  | -408.9  | -674.2 | -2095.6 | -199.8  | -418.1  |
| c2mpyr-br-p2  | -37.2 | -22.6 | -886.4  | -2524.6 | -673.6 | -2095.0 | -196.3  | -408.9  | -674.2 | -2096.4 | -199.8  | -418.0  |
| c2mpyr-br-p3  | -36.3 | -22.3 | -885.8  | -2523.7 | -673.6 | -2094.4 | -196.3  | -408.9  | -674.1 | -2095.7 | -199.6  | -417.7  |
| c2mpyr-cl-p1  | -37.8 | -18.4 | -780.5  | -2366.0 | -673.7 | -2094.3 | -91.5   | -249.2  | -674.1 | -2095.3 | -96.2   | -262.5  |
| c2mpyr-cl-p2  | -36.6 | -17.7 | -780.0  | -2365.7 | -673.6 | -2094.8 | -91.5   | -249.2  | -674.0 | -2095.9 | -96.0   | -262.0  |
| c2mpyr-cl-p3  | -36.3 | -17.8 | -779.8  | -2365.5 | -673.7 | -2094.5 | -91.5   | -249.2  | -674.1 | -2095.5 | -95.9   | -262.0  |
| c2mpyr-dca-p1 | -39.1 | -24.9 | -1213.5 | -3474.7 | -673.5 | -2093.8 | -522.1  | -1359.6 | -674.4 | -2096.0 | -525.8  | -1367.2 |
| c2mpyr-dca-p2 | -43.2 | -27.5 | -1214.7 | -3477.4 | -673.2 | -2093.6 | -522.1  | -1360.0 | -674.2 | -2096.1 | -526.1  | -1368.1 |



|                |       |       |         |         |        |         |         |         |        |         |         |         |
|----------------|-------|-------|---------|---------|--------|---------|---------|---------|--------|---------|---------|---------|
| c2mpyr-dca-p3  | -43.6 | -28.0 | -1214.7 | -3477.9 | -673.4 | -2093.7 | -522.0  | -1359.9 | -674.4 | -2096.2 | -525.9  | -1367.9 |
| c2mpyr-mes-p1  | -45.3 | -18.2 | -1284.5 | -3683.1 | -673.1 | -2093.5 | -591.8  | -1563.9 | -674.0 | -2095.8 | -599.6  | -1580.0 |
| c2mpyr-mes-p2  | -41.6 | -16.2 | -1283.5 | -3681.7 | -673.7 | -2094.1 | -591.8  | -1564.0 | -674.5 | -2096.4 | -599.1  | -1579.0 |
| c2mpyr-mes-p3  | -40.5 | -16.3 | -1282.8 | -3680.9 | -673.4 | -2094.2 | -591.8  | -1563.9 | -674.3 | -2096.5 | -598.5  | -1578.0 |
| c2mpyr-ntf2-p1 | -49.8 | -29.2 | -2589.4 | -6924.8 | -673.4 | -2093.0 | -1895.0 | -4803.0 | -674.3 | -2095.4 | -1900.7 | -4814.7 |
| c2mpyr-ntf2-p2 | -40.3 | -20.7 | -2585.2 | -6917.4 | -673.1 | -2093.0 | -1894.7 | -4801.7 | -673.9 | -2094.9 | -1900.2 | -4813.0 |
| c2mpyr-ntf2-p3 | -49.8 | -28.5 | -2589.3 | -6924.8 | -673.2 | -2093.2 | -1895.0 | -4802.9 | -674.0 | -2095.4 | -1901.0 | -4815.2 |
| c2mpyr-ntf2-p4 | -48.0 | -28.1 | -2588.5 | -6923.8 | -673.3 | -2093.2 | -1895.0 | -4802.9 | -674.1 | -2095.4 | -1900.5 | -4814.2 |
| c2mpyr-ntf2-p5 | -40.7 | -20.8 | -2585.2 | -6917.4 | -673.0 | -2092.9 | -1894.6 | -4801.5 | -673.7 | -2095.0 | -1900.2 | -4813.0 |
| c2mpyr-ntf2-p6 | -39.0 | -19.7 | -2584.8 | -6916.9 | -673.3 | -2093.1 | -1894.7 | -4801.6 | -674.0 | -2095.0 | -1900.2 | -4812.9 |
| c2mpyr-pf6-p1  | -36.6 | -15.4 | -1608.2 | -4475.1 | -673.3 | -2093.2 | -920.0  | -2360.2 | -674.0 | -2095.0 | -926.1  | -2372.8 |
| c2mpyr-pf6-p2  | -34.8 | -14.4 | -1607.5 | -4474.3 | -673.3 | -2093.3 | -920.1  | -2360.3 | -674.0 | -2095.2 | -925.8  | -2372.4 |
| c2mpyr-pf6-p3  | -34.2 | -14.3 | -1607.0 | -4474.0 | -673.2 | -2093.2 | -920.1  | -2360.3 | -673.9 | -2094.9 | -925.8  | -2372.2 |
| c2mpyr-tos-p1  | -41.9 | -15.4 | -1829.4 | -5102.8 | -673.1 | -2093.5 | -1137.8 | -2985.9 | -674.0 | -2095.7 | -1145.5 | -3001.5 |
| c2mpyr-tos-p2  | -38.5 | -13.6 | -1828.4 | -5101.5 | -673.6 | -2094.0 | -1137.8 | -2985.9 | -674.5 | -2096.3 | -1145.0 | -3000.5 |
| c3mim-bf4-p1   | -34.9 | -11.8 | -1430.7 | -3925.5 | -807.2 | -2335.8 | -609.8  | -1568.6 | -808.3 | -2338.7 | -615.8  | -1581.6 |
| c3mim-bf4-p2   | -34.2 | -12.1 | -1430.3 | -3924.8 | -807.0 | -2335.4 | -609.8  | -1568.6 | -808.2 | -2338.4 | -615.5  | -1580.9 |
| c3mim-br-p1    | -35.3 | -18.1 | -1020.9 | -2774.4 | -808.9 | -2345.9 | -196.3  | -408.9  | -809.8 | -2348.0 | -200.1  | -419.1  |
| c3mim-br-p2    | -25.1 | -11.9 | -1017.6 | -2769.5 | -809.3 | -2347.7 | -196.3  | -408.9  | -809.7 | -2348.8 | -199.4  | -417.4  |
| c3mim-br-p3    | -27.8 | -13.7 | -1018.6 | -2770.6 | -809.1 | -2347.2 | -196.3  | -408.9  | -809.4 | -2348.1 | -199.8  | -418.1  |
| c3mim-br-p4    | -36.3 | -18.8 | -1021.1 | -2775.1 | -808.7 | -2346.0 | -196.3  | -408.9  | -809.7 | -2348.2 | -200.2  | -419.3  |
| c3mim-cl-p1    | -32.9 | -10.0 | -913.5  | -2614.6 | -808.8 | -2345.7 | -91.5   | -249.2  | -809.6 | -2347.4 | -96.9   | -264.2  |
| c3mim-cl-p2    | -25.3 | -7.5  | -912.2  | -2611.7 | -809.5 | -2348.4 | -91.5   | -249.2  | -809.9 | -2349.3 | -95.7   | -261.5  |
| c3mim-cl-p3    | -27.5 | -8.3  | -912.8  | -2612.4 | -809.2 | -2347.7 | -91.5   | -249.2  | -809.5 | -2348.5 | -96.3   | -262.6  |
| c3mim-cl-p4    | -33.2 | -10.0 | -913.3  | -2614.8 | -808.6 | -2345.6 | -91.5   | -249.2  | -809.3 | -2347.5 | -97.1   | -264.2  |
| c3mim-dca-p1   | -58.2 | -38.8 | -1360.5 | -3744.8 | -807.1 | -2336.3 | -528.1  | -1375.7 | -808.6 | -2340.0 | -532.7  | -1385.2 |
| c3mim-dca-p2   | -58.4 | -39.1 | -1360.9 | -3745.2 | -807.3 | -2336.7 | -528.1  | -1375.6 | -808.9 | -2340.5 | -532.7  | -1384.9 |
| c3mim-dca-p3   | -50.7 | -32.6 | -1357.6 | -3741.3 | -807.3 | -2337.2 | -528.0  | -1375.6 | -808.5 | -2340.3 | -532.3  | -1385.1 |
| c3mim-dca-p4   | -60.0 | -39.7 | -1361.8 | -3745.3 | -807.2 | -2336.4 | -528.1  | -1375.4 | -808.8 | -2340.2 | -533.0  | -1385.5 |
| c3mim-dca-p5   | -56.7 | -37.7 | -1359.3 | -3743.2 | -806.7 | -2335.6 | -528.1  | -1375.4 | -808.2 | -2339.4 | -532.5  | -1384.7 |
| c3mim-dca-p6   | -54.9 | -36.2 | -1358.7 | -3742.2 | -806.8 | -2335.5 | -528.3  | -1375.5 | -808.2 | -2339.3 | -532.6  | -1384.5 |
| c3mim-mes-p1   | -51.6 | -20.7 | -1421.6 | -3928.4 | -807.7 | -2336.9 | -591.6  | -1562.2 | -808.9 | -2339.9 | -600.4  | -1580.2 |
| c3mim-mes-p2   | -45.3 | -17.7 | -1417.9 | -3923.9 | -806.9 | -2335.6 | -591.6  | -1562.4 | -808.0 | -2338.4 | -599.5  | -1578.3 |
| c3mim-ntf2-p1  | -74.1 | -43.9 | -2734.7 | -7181.1 | -807.2 | -2335.9 | -1895.9 | -4802.8 | -808.7 | -2339.9 | -1904.0 | -4819.3 |
| c3mim-ntf2-p2  | -52.3 | -28.6 | -2725.8 | -7168.3 | -807.3 | -2337.4 | -1895.3 | -4801.7 | -808.2 | -2339.8 | -1902.0 | -4815.4 |
| c3mim-ntf2-p3  | -43.3 | -19.7 | -2722.3 | -7161.8 | -807.0 | -2336.4 | -1895.7 | -4801.7 | -807.9 | -2339.0 | -1902.3 | -4815.2 |
| c3mim-ntf2-p4  | -62.2 | -37.5 | -2729.7 | -7174.5 | -806.8 | -2335.3 | -1896.3 | -4803.6 | -808.0 | -2338.6 | -1902.9 | -4817.1 |
| c3mim-pf6-p1   | -40.3 | -16.1 | -1742.7 | -4719.4 | -806.8 | -2335.4 | -919.9  | -2359.7 | -807.7 | -2337.9 | -926.7  | -2373.6 |
| c3mim-pf6-p2   | -36.1 | -14.0 | -1740.8 | -4716.6 | -806.6 | -2334.9 | -919.9  | -2359.9 | -807.4 | -2337.2 | -926.1  | -2372.5 |



|                |       |       |         |         |        |         |         |         |        |         |         |         |
|----------------|-------|-------|---------|---------|--------|---------|---------|---------|--------|---------|---------|---------|
| c3mim-tos-p1   | -50.5 | -19.3 | -1967.9 | -5350.0 | -807.6 | -2336.7 | -1138.3 | -2984.8 | -808.8 | -2339.8 | -1147.2 | -3002.7 |
| c3mim-tos-p2   | -48.2 | -18.8 | -1966.1 | -5347.8 | -806.8 | -2335.6 | -1138.3 | -2984.9 | -808.0 | -2338.7 | -1146.6 | -3001.7 |
| c3mpyr-bf4-p1  | -35.5 | -14.2 | -1379.0 | -3937.1 | -755.2 | -2348.7 | -609.5  | -1567.2 | -756.1 | -2351.1 | -615.1  | -1579.5 |
| c3mpyr-bf4-p2  | -33.3 | -13.3 | -1378.4 | -3936.2 | -755.5 | -2349.1 | -609.5  | -1567.2 | -756.4 | -2351.5 | -614.7  | -1578.8 |
| c3mpyr-bf4-p3  | -32.3 | -13.4 | -1377.8 | -3935.5 | -755.3 | -2349.0 | -609.5  | -1567.2 | -756.2 | -2351.3 | -614.4  | -1578.1 |
| c3mpyr-br-p1   | -39.2 | -24.2 | -969.3  | -2780.6 | -755.7 | -2349.8 | -196.3  | -408.9  | -756.3 | -2351.2 | -199.9  | -418.3  |
| c3mpyr-br-p2   | -36.6 | -22.3 | -968.2  | -2779.5 | -755.7 | -2350.2 | -196.3  | -408.9  | -756.3 | -2351.6 | -199.7  | -417.8  |
| c3mpyr-br-p3   | -37.1 | -22.8 | -968.2  | -2779.7 | -755.7 | -2350.0 | -196.3  | -408.9  | -756.2 | -2351.4 | -199.7  | -417.9  |
| c3mpyr-cl-p1   | -38.4 | -18.6 | -862.8  | -2622.0 | -755.8 | -2349.9 | -91.5   | -249.2  | -756.2 | -2351.0 | -96.3   | -262.7  |
| c3mpyr-cl-p2   | -36.9 | -17.9 | -862.2  | -2621.4 | -755.6 | -2350.4 | -91.5   | -249.2  | -756.1 | -2351.5 | -96.1   | -262.1  |
| c3mpyr-cl-p3   | -36.8 | -17.9 | -862.0  | -2621.3 | -755.7 | -2350.1 | -91.5   | -249.2  | -756.2 | -2351.1 | -96.0   | -262.1  |
| c3mpyr-dca-p1  | -40.6 | -25.3 | -1296.0 | -3731.2 | -755.4 | -2349.2 | -522.2  | -1359.8 | -756.3 | -2351.5 | -526.1  | -1367.9 |
| c3mpyr-dca-p2  | -43.3 | -27.6 | -1296.8 | -3733.1 | -755.3 | -2349.1 | -522.1  | -1360.0 | -756.2 | -2351.7 | -526.1  | -1368.1 |
| c3mpyr-dca-p3  | -37.9 | -24.1 | -1293.5 | -3731.8 | -755.3 | -2349.1 | -522.3  | -1360.6 | -756.2 | -2351.2 | -525.7  | -1368.0 |
| c3mpyr-dca-p4  | -41.1 | -26.4 | -1295.7 | -3731.9 | -755.5 | -2349.2 | -522.0  | -1359.8 | -756.5 | -2351.7 | -525.7  | -1367.3 |
| c3mpyr-dca-p5  | -43.7 | -27.9 | -1296.8 | -3733.5 | -755.4 | -2349.3 | -522.0  | -1359.9 | -756.5 | -2351.9 | -526.0  | -1368.0 |
| c3mpyr-mes-p1  | -46.3 | -18.6 | -1366.9 | -3939.3 | -755.2 | -2349.1 | -591.8  | -1563.9 | -756.1 | -2351.4 | -599.8  | -1580.3 |
| c3mpyr-mes-p2  | -42.1 | -16.5 | -1365.7 | -3937.6 | -755.7 | -2349.6 | -591.8  | -1564.0 | -756.6 | -2351.9 | -599.2  | -1579.1 |
| c3mpyr-mes-p3  | -41.5 | -16.7 | -1365.3 | -3937.2 | -755.4 | -2349.8 | -591.8  | -1563.9 | -756.4 | -2352.2 | -598.7  | -1578.4 |
| c3mpyr-ntf2-p1 | -52.5 | -30.4 | -2672.6 | -7182.2 | -755.5 | -2348.8 | -1895.0 | -4803.0 | -756.4 | -2351.3 | -1901.1 | -4815.5 |
| c3mpyr-ntf2-p2 | -38.7 | -20.3 | -2666.9 | -7171.8 | -755.2 | -2348.6 | -1894.6 | -4801.6 | -756.0 | -2350.6 | -1899.8 | -4812.1 |
| c3mpyr-ntf2-p3 | -49.9 | -28.7 | -2671.4 | -7180.4 | -755.2 | -2348.7 | -1895.0 | -4803.0 | -756.0 | -2350.9 | -1901.0 | -4815.2 |
| c3mpyr-ntf2-p4 | -50.1 | -29.1 | -2671.5 | -7180.5 | -755.3 | -2348.8 | -1894.9 | -4802.8 | -756.2 | -2351.2 | -1900.8 | -4814.7 |
| c3mpyr-ntf2-p5 | -41.0 | -20.9 | -2667.3 | -7173.1 | -755.0 | -2348.5 | -1894.5 | -4801.4 | -755.8 | -2350.6 | -1900.2 | -4813.0 |
| c3mpyr-ntf2-p6 | -41.2 | -20.6 | -2667.7 | -7173.8 | -755.3 | -2348.8 | -1894.7 | -4801.5 | -756.1 | -2350.8 | -1900.6 | -4813.5 |
| c3mpyr-pf6-p1  | -37.8 | -15.7 | -1690.4 | -4731.3 | -755.1 | -2348.6 | -920.0  | -2360.2 | -755.8 | -2350.5 | -926.4  | -2373.4 |
| c3mpyr-pf6-p2  | -34.9 | -14.5 | -1689.5 | -4729.9 | -755.3 | -2348.9 | -920.1  | -2360.3 | -756.0 | -2350.7 | -925.8  | -2372.4 |
| c3mpyr-pf6-p3  | -34.8 | -14.5 | -1689.3 | -4729.9 | -755.2 | -2348.8 | -920.1  | -2360.3 | -755.9 | -2350.6 | -925.8  | -2372.3 |
| c3mpyr-tos-p1  | -43.0 | -15.9 | -1911.8 | -5359.0 | -755.2 | -2349.1 | -1137.7 | -2985.8 | -756.1 | -2351.4 | -1145.7 | -3001.7 |
| c3mpyr-tos-p2  | -39.1 | -14.0 | -1910.6 | -5357.4 | -755.6 | -2349.6 | -1137.8 | -2985.9 | -756.5 | -2351.9 | -1145.0 | -3000.5 |
| c4mim-bf4-p1   | -35.6 | -12.0 | -1512.9 | -4180.6 | -889.0 | -2590.4 | -609.8  | -1568.6 | -890.2 | -2593.5 | -615.9  | -1581.8 |
| c4mim-bf4-p2   | -34.4 | -12.2 | -1512.1 | -4179.4 | -888.8 | -2589.9 | -609.8  | -1568.6 | -889.9 | -2592.9 | -615.5  | -1581.0 |
| c4mim-br-p1    | -36.1 | -18.7 | -1103.1 | -3030.4 | -890.8 | -2601.4 | -196.3  | -408.9  | -891.7 | -2603.6 | -200.2  | -419.3  |
| c4mim-br-p2    | -26.0 | -12.4 | -1099.9 | -3025.6 | -891.2 | -2603.1 | -196.3  | -408.9  | -891.6 | -2604.3 | -199.5  | -417.6  |
| c4mim-br-p3    | -29.1 | -14.6 | -1101.0 | -3026.9 | -890.9 | -2602.6 | -196.3  | -408.9  | -891.3 | -2603.6 | -199.9  | -418.4  |
| c4mim-br-p4    | -36.9 | -19.2 | -1103.1 | -3030.7 | -890.5 | -2601.2 | -196.3  | -408.9  | -891.4 | -2603.5 | -200.2  | -419.4  |
| c4mim-cl-p1    | -33.6 | -10.4 | -995.6  | -2870.5 | -890.6 | -2601.2 | -91.5   | -249.2  | -891.4 | -2603.0 | -96.9   | -264.3  |
| c4mim-cl-p2    | -26.0 | -7.8  | -994.4  | -2867.6 | -891.4 | -2603.9 | -91.5   | -249.2  | -891.8 | -2604.8 | -95.8   | -261.7  |
| c4mim-cl-p3    | -28.5 | -8.8  | -995.1  | -2868.4 | -891.1 | -2603.1 | -91.5   | -249.2  | -891.4 | -2603.9 | -96.5   | -262.9  |



|                |       |       |         |         |        |         |         |         |        |         |         |         |
|----------------|-------|-------|---------|---------|--------|---------|---------|---------|--------|---------|---------|---------|
| c4mim-cl-p4    | -33.6 | -10.2 | -995.2  | -2870.3 | -890.3 | -2600.9 | -91.5   | -249.2  | -891.1 | -2602.8 | -97.2   | -264.3  |
| c4mim-dca-p1   | -59.0 | -39.3 | -1442.7 | -3999.9 | -888.9 | -2590.9 | -528.1  | -1375.8 | -890.5 | -2594.8 | -532.7  | -1385.3 |
| c4mim-dca-p2   | -61.6 | -40.6 | -1444.3 | -4001.0 | -889.1 | -2591.0 | -528.1  | -1375.5 | -890.8 | -2595.0 | -533.2  | -1385.8 |
| c4mim-dca-p3   | -57.0 | -37.9 | -1441.2 | -3998.1 | -888.5 | -2590.2 | -528.0  | -1375.5 | -890.0 | -2594.0 | -532.5  | -1384.8 |
| c4mim-mes-p1   | -52.9 | -21.4 | -1504.0 | -4183.8 | -889.6 | -2591.5 | -591.6  | -1562.2 | -890.8 | -2594.6 | -600.6  | -1580.4 |
| c4mim-mes-p2   | -45.4 | -17.8 | -1499.7 | -4178.5 | -888.7 | -2590.0 | -591.6  | -1562.4 | -889.8 | -2592.9 | -599.5  | -1578.3 |
| c4mim-pf6-p1   | -43.1 | -15.8 | -1826.1 | -4976.2 | -888.9 | -2590.5 | -919.9  | -2359.8 | -890.0 | -2593.2 | -927.7  | -2375.6 |
| c4mim-pf6-p2   | -36.2 | -14.0 | -1822.5 | -4971.2 | -888.4 | -2589.4 | -919.9  | -2359.9 | -889.2 | -2591.8 | -926.2  | -2372.6 |
| c4mim-tos-p1   | -52.6 | -20.6 | -2050.8 | -5605.9 | -889.5 | -2591.5 | -1138.3 | -2984.8 | -890.8 | -2594.7 | -1147.4 | -3003.1 |
| c4mim-tos-p2   | -48.4 | -19.4 | -2048.7 | -5602.9 | -889.2 | -2590.9 | -1138.3 | -2984.8 | -890.5 | -2594.1 | -1146.5 | -3001.2 |
| c4mpyr-bf4-p1  | -35.6 | -14.3 | -1460.8 | -4192.4 | -837.0 | -2603.9 | -609.5  | -1567.2 | -837.9 | -2606.3 | -615.1  | -1579.6 |
| c4mpyr-bf4-p2  | -33.5 | -13.4 | -1460.2 | -4191.5 | -837.2 | -2604.3 | -609.5  | -1567.2 | -838.2 | -2606.7 | -614.7  | -1578.8 |
| c4mpyr-bf4-p3  | -32.5 | -13.5 | -1459.8 | -4190.9 | -837.1 | -2604.3 | -609.5  | -1567.2 | -838.1 | -2606.6 | -614.4  | -1578.2 |
| c4mpyr-br-p1   | -39.5 | -24.3 | -1051.2 | -3036.0 | -837.5 | -2605.0 | -196.3  | -408.9  | -838.1 | -2606.4 | -199.9  | -418.4  |
| c4mpyr-br-p2   | -36.7 | -22.5 | -1050.0 | -3034.8 | -837.5 | -2605.4 | -196.3  | -408.9  | -838.1 | -2606.8 | -199.7  | -417.8  |
| c4mpyr-br-p3   | -37.3 | -22.9 | -1050.1 | -3035.1 | -837.5 | -2605.2 | -196.3  | -408.9  | -838.1 | -2606.6 | -199.7  | -417.9  |
| c4mpyr-cl-p1   | -38.5 | -18.6 | -944.6  | -2877.2 | -837.5 | -2605.0 | -91.5   | -249.2  | -838.0 | -2606.1 | -96.3   | -262.7  |
| c4mpyr-cl-p2   | -37.7 | -18.3 | -944.3  | -2877.3 | -837.4 | -2605.6 | -91.5   | -249.2  | -837.9 | -2606.8 | -96.2   | -262.4  |
| c4mpyr-cl-p3   | -36.8 | -17.9 | -943.8  | -2876.5 | -837.5 | -2605.3 | -91.5   | -249.2  | -838.0 | -2606.3 | -96.0   | -262.1  |
| c4mpyr-dca-p1  | -41.2 | -26.6 | -1377.2 | -3987.2 | -837.1 | -2604.0 | -522.1  | -1360.1 | -838.2 | -2606.7 | -525.6  | -1367.2 |
| c4mpyr-dca-p2  | -43.5 | -27.6 | -1378.6 | -3988.4 | -837.1 | -2604.4 | -522.1  | -1360.0 | -838.1 | -2607.0 | -526.1  | -1368.2 |
| c4mpyr-dca-p3  | -41.3 | -25.7 | -1378.0 | -3986.7 | -837.2 | -2604.3 | -522.1  | -1359.8 | -838.1 | -2606.6 | -526.2  | -1368.1 |
| c4mpyr-dca-p4  | -42.7 | -27.7 | -1378.0 | -3988.1 | -837.1 | -2604.3 | -522.1  | -1359.9 | -838.1 | -2606.8 | -525.9  | -1367.6 |
| c4mpyr-dca-p5  | -43.8 | -28.1 | -1378.7 | -3988.8 | -837.2 | -2604.4 | -522.1  | -1359.9 | -838.3 | -2607.1 | -526.0  | -1368.0 |
| c4mpyr-mes-p1  | -46.4 | -18.7 | -1448.7 | -4194.6 | -837.0 | -2604.2 | -591.8  | -1563.9 | -837.9 | -2606.6 | -599.8  | -1580.3 |
| c4mpyr-mes-p2  | -42.6 | -16.8 | -1447.6 | -4193.1 | -837.5 | -2604.8 | -591.8  | -1564.0 | -838.4 | -2607.2 | -599.2  | -1579.2 |
| c4mpyr-mes-p3  | -41.8 | -16.9 | -1447.2 | -4192.5 | -837.3 | -2605.0 | -591.8  | -1563.9 | -838.3 | -2607.4 | -598.7  | -1578.4 |
| c4mpyr-ntf2-p1 | -52.6 | -30.6 | -2754.4 | -7437.2 | -837.2 | -2604.0 | -1895.0 | -4802.9 | -838.2 | -2606.4 | -1901.1 | -4815.4 |
| c4mpyr-ntf2-p2 | -43.8 | -22.8 | -2750.5 | -7429.6 | -837.0 | -2603.6 | -1894.5 | -4801.2 | -837.8 | -2605.8 | -1900.5 | -4813.3 |
| c4mpyr-ntf2-p3 | -51.1 | -29.5 | -2753.8 | -7436.4 | -837.0 | -2604.0 | -1895.0 | -4803.0 | -837.8 | -2606.3 | -1901.1 | -4815.5 |
| c4mpyr-ntf2-p4 | -51.1 | -29.8 | -2753.7 | -7436.3 | -837.1 | -2604.0 | -1894.9 | -4802.9 | -838.0 | -2606.4 | -1900.9 | -4815.0 |
| c4mpyr-ntf2-p5 | -41.4 | -21.4 | -2749.3 | -7428.5 | -836.8 | -2603.7 | -1894.5 | -4801.4 | -837.5 | -2605.7 | -1900.2 | -4812.9 |
| c4mpyr-ntf2-p6 | -42.4 | -21.5 | -2750.0 | -7429.5 | -837.2 | -2604.0 | -1894.6 | -4801.4 | -837.9 | -2606.0 | -1900.6 | -4813.5 |
| c4mpyr-pf6-p1  | -37.9 | -15.8 | -1772.3 | -4986.6 | -836.9 | -2603.7 | -920.1  | -2360.2 | -837.7 | -2605.6 | -926.4  | -2373.4 |
| c4mpyr-pf6-p2  | -35.2 | -14.7 | -1771.4 | -4985.3 | -837.1 | -2604.1 | -920.1  | -2360.3 | -837.9 | -2606.0 | -925.8  | -2372.4 |
| c4mpyr-pf6-p3  | -35.0 | -14.6 | -1771.2 | -4985.3 | -837.1 | -2604.0 | -920.1  | -2360.3 | -837.8 | -2605.8 | -925.9  | -2372.4 |
| c4mpyr-tos-p1  | -43.3 | -16.1 | -1993.9 | -5614.5 | -837.0 | -2604.3 | -1137.8 | -2985.9 | -838.0 | -2606.6 | -1145.8 | -3001.9 |
| c4mpyr-tos-p2  | -39.7 | -14.3 | -1992.7 | -5613.1 | -837.5 | -2604.8 | -1137.9 | -2986.0 | -838.4 | -2607.1 | -1145.2 | -3000.8 |



## 2.2.2 KSVP basis set

Table S 3: Raw KSVP energies. Superscript \* indicates monomer calculated in the dimer basis set.

| ion pair       | E(int) | E(int) CP | E(dimer) SS | E(dimer) OS | E(A) SS | E(A) OS | E(B) SS | E(B) OS | E(A) SS* | E(A) OS* | E(B) SS* | E(B) OS* |
|----------------|--------|-----------|-------------|-------------|---------|---------|---------|---------|----------|----------|----------|----------|
| c1mim-bf4-p1   | -34.5  | -14.0     | -1281.7     | -3553.1     | -658.6  | -1963.2 | -609.8  | -1568.6 | -659.6   | -1965.7  | -615.2   | -1580.3  |
| c1mim-br-p1    | -37.6  | -21.5     | -873.0      | -2402.1     | -660.4  | -1971.9 | -196.3  | -408.9  | -661.3   | -1973.8  | -199.9   | -418.6   |
| c1mim-br-p2    | -24.4  | -12.7     | -868.3      | -2393.2     | -660.1  | -1971.9 | -196.3  | -408.9  | -660.4   | -1972.7  | -199.1   | -416.6   |
| c1mim-cl-p1    | -35.1  | -13.3     | -765.5      | -2242.2     | -660.3  | -1971.6 | -91.5   | -249.2  | -661.0   | -1973.2  | -96.7    | -263.4   |
| c1mim-cl-p2    | -26.6  | -10.0     | -763.7      | -2236.4     | -660.3  | -1972.5 | -91.5   | -249.2  | -660.5   | -1973.1  | -95.4    | -261.0   |
| c1mim-dca-p1   | -56.7  | -38.1     | -1212.1     | -3371.4     | -659.0  | -1964.4 | -528.2  | -1375.3 | -660.4   | -1967.7  | -532.7   | -1384.7  |
| c1mim-dca-p2   | -43.7  | -29.1     | -1206.7     | -3364.6     | -658.9  | -1965.4 | -527.9  | -1375.3 | -659.8   | -1967.4  | -531.5   | -1383.7  |
| c1mim-mes-p1   | -45.3  | -18.5     | -1277.2     | -3601.3     | -659.1  | -1964.1 | -598.4  | -1611.7 | -660.0   | -1966.4  | -606.2   | -1627.4  |
| c1mim-ntf2-p1  | -68.6  | -42.9     | -2583.6     | -6805.7     | -658.6  | -1963.4 | -1895.9 | -4802.8 | -659.8   | -1966.4  | -1902.9  | -4817.2  |
| c1mim-ntf2-p2  | -40.3  | -23.3     | -2572.3     | -6787.5     | -658.8  | -1965.2 | -1894.9 | -4800.6 | -659.4   | -1966.7  | -1899.6  | -4810.9  |
| c1mim-ntf2-p3  | -40.8  | -20.1     | -2572.8     | -6788.0     | -658.6  | -1964.1 | -1895.7 | -4801.7 | -659.5   | -1966.3  | -1901.4  | -4813.6  |
| c1mim-pf6-p1   | -38.6  | -16.2     | -1593.7     | -4346.7     | -658.6  | -1963.3 | -919.9  | -2359.9 | -659.4   | -1965.5  | -926.3   | -2372.9  |
| c1mim-tos-p1   | -42.6  | -16.6     | -1830.9     | -5084.9     | -658.8  | -1963.9 | -1153.4 | -3097.1 | -659.8   | -1966.4  | -1160.9  | -3112.1  |
| c1mpyr-bf4-p1  | -36.0  | -15.9     | -1242.6     | -3648.4     | -618.2  | -2060.0 | -609.5  | -1567.2 | -618.9   | -2061.7  | -615.0   | -1579.4  |
| c1mpyr-bf4-p2  | -32.8  | -15.1     | -1241.4     | -3646.6     | -618.3  | -2060.2 | -609.5  | -1567.2 | -618.9   | -2061.6  | -614.4   | -1578.1  |
| c1mpyr-br-p1   | -40.7  | -26.4     | -833.3      | -2492.5     | -618.8  | -2061.2 | -196.3  | -408.9  | -619.2   | -2062.1  | -199.8   | -418.3   |
| c1mpyr-br-p2   | -38.8  | -25.3     | -832.4      | -2491.8     | -618.8  | -2061.4 | -196.3  | -408.9  | -619.1   | -2062.2  | -199.7   | -417.9   |
| c1mpyr-cl-p1   | -40.0  | -20.8     | -726.9      | -2333.9     | -618.8  | -2061.3 | -91.5   | -249.2  | -619.1   | -2061.9  | -96.3    | -262.6   |
| c1mpyr-cl-p2   | -38.9  | -20.4     | -726.4      | -2333.4     | -618.8  | -2061.4 | -91.5   | -249.2  | -619.1   | -2062.0  | -96.0    | -262.2   |
| c1mpyr-dca-p1  | -40.7  | -26.8     | -1159.8     | -3442.0     | -618.7  | -2060.8 | -522.1  | -1359.6 | -619.3   | -2062.3  | -525.9   | -1367.5  |
| c1mpyr-dca-p2  | -45.1  | -30.3     | -1161.0     | -3445.1     | -618.5  | -2060.5 | -522.0  | -1359.9 | -619.3   | -2062.3  | -526.0   | -1368.2  |
| c1mpyr-dca-p3  | -40.5  | -27.0     | -1157.8     | -3443.8     | -618.3  | -2060.3 | -522.1  | -1360.3 | -618.9   | -2061.8  | -525.7   | -1368.2  |
| c1mpyr-dca-p4  | -43.4  | -29.3     | -1160.0     | -3443.9     | -618.3  | -2060.2 | -522.1  | -1359.9 | -619.0   | -2062.0  | -525.9   | -1367.7  |
| c1mpyr-mes-p1  | -44.6  | -18.8     | -1236.9     | -3698.0     | -618.2  | -2060.4 | -598.5  | -1613.2 | -618.9   | -2062.1  | -606.2   | -1629.0  |
| c1mpyr-mes-p2  | -40.0  | -17.2     | -1235.2     | -3695.7     | -618.4  | -2060.8 | -598.5  | -1613.2 | -619.1   | -2062.4  | -605.1   | -1627.0  |
| c1mpyr-ntf2-p1 | -51.8  | -31.6     | -2535.5     | -6892.5     | -618.5  | -2060.1 | -1894.9 | -4802.8 | -619.2   | -2061.7  | -1900.8  | -4814.8  |
| c1mpyr-ntf2-p2 | -40.7  | -21.9     | -2530.7     | -6884.1     | -618.3  | -2059.8 | -1894.6 | -4801.5 | -618.9   | -2061.3  | -1900.2  | -4812.7  |
| c1mpyr-ntf2-p3 | -50.1  | -30.8     | -2535.0     | -6891.1     | -618.5  | -2060.2 | -1894.8 | -4802.5 | -619.1   | -2061.7  | -1900.4  | -4814.0  |
| c1mpyr-ntf2-p5 | -42.0  | -22.4     | -2531.4     | -6884.8     | -618.4  | -2060.0 | -1894.5 | -4801.1 | -619.0   | -2061.4  | -1900.3  | -4813.0  |
| c1mpyr-pf6-p1  | -38.3  | -17.2     | -1554.0     | -4442.7     | -618.2  | -2060.0 | -920.0  | -2360.2 | -618.8   | -2061.2  | -926.3   | -2373.3  |
| c1mpyr-pf6-p2  | -35.6  | -16.1     | -1553.0     | -4441.4     | -618.3  | -2060.1 | -920.1  | -2360.3 | -618.8   | -2061.1  | -925.9   | -2372.4  |
| c1mpyr-tos-p1  | -41.2  | -15.9     | -1790.1     | -5180.4     | -618.2  | -2060.4 | -1152.8 | -3097.7 | -619.0   | -2062.1  | -1160.4  | -3113.1  |
| c1mpyr-tos-p2  | -36.5  | -13.9     | -1787.8     | -5178.0     | -618.3  | -2060.5 | -1152.7 | -3097.7 | -618.9   | -2061.8  | -1159.6  | -3111.5  |



|               |       |       |         |         |        |         |         |         |        |         |         |         |
|---------------|-------|-------|---------|---------|--------|---------|---------|---------|--------|---------|---------|---------|
| c2mim-bf4-p1  | -36.7 | -14.3 | -1371.2 | -3844.1 | -747.0 | -2253.2 | -609.8  | -1568.6 | -748.1 | -2255.7 | -615.7  | -1581.5 |
| c2mim-bf4-p2  | -34.1 | -13.9 | -1369.7 | -3842.1 | -746.6 | -2252.5 | -609.8  | -1568.6 | -747.6 | -2254.8 | -615.2  | -1580.3 |
| c2mim-br-p1   | -38.9 | -22.0 | -961.5  | -2692.4 | -748.3 | -2261.4 | -196.3  | -408.9  | -749.2 | -2263.3 | -200.1  | -419.3  |
| c2mim-br-p2   | -28.2 | -14.8 | -958.8  | -2686.5 | -748.9 | -2263.0 | -196.3  | -408.9  | -749.3 | -2264.0 | -199.5  | -417.7  |
| c2mim-br-p3   | -27.9 | -14.9 | -958.0  | -2685.7 | -748.3 | -2262.3 | -196.3  | -408.9  | -748.6 | -2263.1 | -199.5  | -417.6  |
| c2mim-br-p4   | -39.1 | -22.7 | -961.9  | -2693.1 | -748.7 | -2262.0 | -196.3  | -408.9  | -749.5 | -2263.9 | -200.0  | -418.8  |
| c2mim-cl-p1   | -36.6 | -13.7 | -854.1  | -2532.8 | -748.3 | -2261.3 | -91.5   | -249.2  | -749.0 | -2262.9 | -97.0   | -264.4  |
| c2mim-cl-p2   | -29.7 | -11.1 | -853.8  | -2529.4 | -749.1 | -2263.6 | -91.5   | -249.2  | -749.4 | -2264.4 | -95.9   | -262.2  |
| c2mim-cl-p3   | -29.4 | -10.9 | -853.0  | -2528.5 | -748.5 | -2262.9 | -91.5   | -249.2  | -748.7 | -2263.5 | -96.1   | -262.3  |
| c2mim-cl-p4   | -36.2 | -14.2 | -854.1  | -2533.0 | -748.5 | -2261.7 | -91.5   | -249.2  | -749.2 | -2263.3 | -96.8   | -263.6  |
| c2mim-dca-p1  | -59.7 | -40.9 | -1301.1 | -3662.9 | -746.9 | -2253.6 | -528.0  | -1375.7 | -748.2 | -2256.8 | -532.7  | -1385.4 |
| c2mim-dca-p2  | -55.9 | -37.8 | -1299.9 | -3660.3 | -747.1 | -2253.6 | -528.1  | -1375.5 | -748.3 | -2256.6 | -532.7  | -1384.8 |
| c2mim-dca-p3  | -59.9 | -40.8 | -1301.8 | -3662.6 | -747.1 | -2253.6 | -528.3  | -1375.5 | -748.5 | -2256.8 | -533.0  | -1385.4 |
| c2mim-dca-p4  | -56.4 | -38.7 | -1300.0 | -3660.6 | -747.0 | -2253.7 | -528.1  | -1375.5 | -748.3 | -2256.7 | -532.5  | -1384.4 |
| c2mim-dca-p5  | -57.0 | -38.4 | -1300.3 | -3661.0 | -746.9 | -2253.7 | -528.3  | -1375.3 | -748.3 | -2256.9 | -532.7  | -1384.8 |
| c2mim-dca-p6  | -57.2 | -38.8 | -1300.0 | -3661.1 | -746.9 | -2253.2 | -528.3  | -1375.4 | -748.3 | -2256.5 | -532.7  | -1384.8 |
| c2mim-mes-p1  | -51.1 | -21.8 | -1368.3 | -3894.5 | -747.6 | -2254.1 | -598.4  | -1611.5 | -748.7 | -2256.7 | -606.9  | -1628.7 |
| c2mim-mes-p2  | -46.6 | -19.2 | -1365.5 | -3891.3 | -746.9 | -2253.2 | -598.4  | -1611.7 | -747.9 | -2255.6 | -606.3  | -1627.8 |
| c2mim-ntf2-p1 | -75.0 | -46.4 | -2674.9 | -7099.2 | -747.1 | -2253.4 | -1895.8 | -4802.7 | -748.4 | -2256.5 | -1903.8 | -4818.9 |
| c2mim-ntf2-p2 | -51.7 | -29.7 | -2665.6 | -7085.0 | -747.1 | -2254.8 | -1895.3 | -4801.7 | -747.9 | -2256.6 | -1901.6 | -4814.8 |
| c2mim-ntf2-p3 | -44.7 | -21.9 | -2663.0 | -7079.7 | -746.9 | -2253.8 | -1895.7 | -4801.6 | -747.7 | -2255.9 | -1902.1 | -4815.0 |
| c2mim-ntf2-p4 | -64.7 | -39.7 | -2671.0 | -7093.6 | -746.9 | -2253.1 | -1896.4 | -4803.6 | -748.0 | -2256.0 | -1903.3 | -4817.7 |
| c2mim-pf6-p1  | -43.3 | -17.6 | -1684.0 | -4639.1 | -746.9 | -2253.1 | -919.9  | -2359.8 | -747.8 | -2255.4 | -927.4  | -2375.0 |
| c2mim-pf6-p2  | -38.9 | -16.6 | -1681.7 | -4636.1 | -746.6 | -2252.5 | -919.9  | -2359.9 | -747.4 | -2254.6 | -926.3  | -2372.9 |
| c2mim-tos-p1  | -49.8 | -20.1 | -1922.8 | -5378.7 | -747.5 | -2254.0 | -1153.3 | -3096.8 | -748.6 | -2256.7 | -1162.0 | -3114.1 |
| c2mim-tos-p2  | -43.9 | -17.2 | -1919.6 | -5374.7 | -746.9 | -2253.2 | -1153.3 | -3097.0 | -747.9 | -2255.7 | -1161.1 | -3112.5 |
| c2mpyr-bf4-p1 | -36.9 | -16.3 | -1332.6 | -3940.7 | -707.8 | -2351.8 | -609.5  | -1567.2 | -708.6 | -2353.5 | -615.1  | -1579.7 |
| c2mpyr-bf4-p2 | -34.7 | -15.4 | -1332.1 | -3939.9 | -708.3 | -2352.2 | -609.5  | -1567.3 | -709.0 | -2353.9 | -614.7  | -1579.0 |
| c2mpyr-bf4-p3 | -33.8 | -15.4 | -1331.5 | -3939.1 | -708.0 | -2352.0 | -609.5  | -1567.2 | -708.7 | -2353.6 | -614.5  | -1578.4 |
| c2mpyr-br-p1  | -41.7 | -27.1 | -923.3  | -2784.9 | -708.4 | -2352.9 | -196.3  | -408.9  | -708.9 | -2353.9 | -199.9  | -418.4  |
| c2mpyr-br-p2  | -40.7 | -26.2 | -922.8  | -2784.8 | -708.3 | -2353.4 | -196.3  | -408.9  | -708.8 | -2354.5 | -199.9  | -418.3  |
| c2mpyr-br-p3  | -39.8 | -25.8 | -922.3  | -2784.0 | -708.3 | -2353.0 | -196.3  | -408.9  | -708.8 | -2353.9 | -199.7  | -418.1  |
| c2mpyr-cl-p1  | -40.7 | -21.1 | -816.8  | -2626.1 | -708.5 | -2352.9 | -91.5   | -249.2  | -708.8 | -2353.7 | -96.4   | -262.8  |
| c2mpyr-cl-p2  | -39.8 | -20.8 | -816.2  | -2625.8 | -708.2 | -2353.2 | -91.5   | -249.2  | -708.6 | -2354.0 | -96.2   | -262.4  |
| c2mpyr-cl-p3  | -39.3 | -20.6 | -816.1  | -2625.5 | -708.4 | -2353.1 | -91.5   | -249.2  | -708.8 | -2353.8 | -96.1   | -262.4  |
| c2mpyr-dca-p1 | -41.1 | -27.0 | -1249.5 | -3734.0 | -708.3 | -2352.5 | -522.1  | -1359.6 | -709.0 | -2354.1 | -525.9  | -1367.5 |
| c2mpyr-dca-p2 | -45.2 | -29.9 | -1250.8 | -3736.7 | -708.0 | -2352.2 | -522.1  | -1360.0 | -708.8 | -2354.1 | -526.3  | -1368.5 |
| c2mpyr-dca-p3 | -45.8 | -30.6 | -1250.8 | -3737.3 | -708.1 | -2352.2 | -522.0  | -1359.9 | -708.9 | -2354.1 | -526.1  | -1368.3 |
| c2mpyr-mes-p1 | -46.7 | -19.7 | -1327.2 | -3991.1 | -707.8 | -2352.2 | -598.5  | -1613.2 | -708.6 | -2353.9 | -606.5  | -1629.6 |



|                |       |       |         |         |        |         |         |         |        |         |         |         |
|----------------|-------|-------|---------|---------|--------|---------|---------|---------|--------|---------|---------|---------|
| c2mpyr-mes-p2  | -42.9 | -17.8 | -1326.1 | -3989.7 | -708.4 | -2352.6 | -598.5  | -1613.3 | -709.1 | -2354.3 | -606.0  | -1628.6 |
| c2mpyr-mes-p3  | -41.9 | -18.0 | -1325.5 | -3988.8 | -708.0 | -2352.6 | -598.5  | -1613.2 | -708.8 | -2354.4 | -605.5  | -1627.6 |
| c2mpyr-ntf2-p1 | -52.7 | -32.1 | -2625.7 | -7184.9 | -708.1 | -2351.7 | -1895.0 | -4803.0 | -708.9 | -2353.5 | -1900.9 | -4815.1 |
| c2mpyr-ntf2-p2 | -42.9 | -23.2 | -2621.4 | -7177.3 | -707.9 | -2351.6 | -1894.7 | -4801.7 | -708.5 | -2353.1 | -1900.4 | -4813.5 |
| c2mpyr-ntf2-p3 | -52.6 | -31.3 | -2625.5 | -7184.7 | -708.0 | -2351.8 | -1895.0 | -4802.9 | -708.6 | -2353.4 | -1901.2 | -4815.6 |
| c2mpyr-ntf2-p4 | -50.9 | -31.1 | -2624.8 | -7183.8 | -708.0 | -2351.8 | -1895.0 | -4802.9 | -708.7 | -2353.4 | -1900.7 | -4814.7 |
| c2mpyr-ntf2-p5 | -43.7 | -23.6 | -2621.5 | -7177.5 | -707.7 | -2351.6 | -1894.6 | -4801.5 | -708.3 | -2353.1 | -1900.5 | -4813.5 |
| c2mpyr-ntf2-p6 | -41.9 | -22.5 | -2621.1 | -7176.9 | -708.0 | -2351.8 | -1894.7 | -4801.6 | -708.6 | -2353.2 | -1900.4 | -4813.4 |
| c2mpyr-pf6-p1  | -38.7 | -17.4 | -1644.0 | -4734.8 | -708.0 | -2351.9 | -920.0  | -2360.2 | -708.7 | -2353.4 | -926.2  | -2373.2 |
| c2mpyr-pf6-p2  | -36.7 | -16.4 | -1643.3 | -4733.9 | -708.1 | -2351.9 | -920.1  | -2360.3 | -708.7 | -2353.3 | -926.0  | -2372.7 |
| c2mpyr-pf6-p3  | -36.3 | -16.4 | -1642.9 | -4733.6 | -707.9 | -2351.9 | -920.1  | -2360.3 | -708.5 | -2353.1 | -925.9  | -2372.6 |
| c2mpyr-tos-p1  | -43.4 | -17.0 | -1880.4 | -5473.5 | -707.8 | -2352.1 | -1152.8 | -3097.8 | -708.6 | -2353.9 | -1160.7 | -3113.7 |
| c2mpyr-tos-p2  | -40.0 | -15.3 | -1879.4 | -5472.2 | -708.4 | -2352.6 | -1152.8 | -3097.8 | -709.1 | -2354.2 | -1160.2 | -3112.7 |
| c3mim-bf4-p1   | -37.8 | -14.6 | -1458.7 | -4133.8 | -834.1 | -2542.2 | -609.8  | -1568.6 | -835.2 | -2544.8 | -616.0  | -1582.0 |
| c3mim-bf4-p2   | -37.0 | -14.9 | -1458.2 | -4133.0 | -834.0 | -2541.9 | -609.8  | -1568.6 | -835.0 | -2544.4 | -615.6  | -1581.2 |
| c3mim-br-p1    | -39.5 | -22.3 | -1048.8 | -2982.5 | -835.4 | -2551.2 | -196.3  | -408.9  | -836.3 | -2553.1 | -200.2  | -419.4  |
| c3mim-br-p2    | -28.7 | -15.2 | -1045.8 | -2976.2 | -835.7 | -2552.4 | -196.3  | -408.9  | -836.1 | -2553.4 | -199.6  | -417.8  |
| c3mim-br-p3    | -31.5 | -17.1 | -1046.7 | -2977.5 | -835.4 | -2552.1 | -196.3  | -408.9  | -835.8 | -2552.9 | -199.9  | -418.5  |
| c3mim-br-p4    | -40.6 | -23.1 | -1049.2 | -2983.3 | -835.4 | -2551.3 | -196.3  | -408.9  | -836.3 | -2553.3 | -200.3  | -419.6  |
| c3mim-cl-p1    | -37.1 | -13.9 | -941.3  | -2822.7 | -835.3 | -2550.9 | -91.5   | -249.2  | -836.1 | -2552.5 | -97.0   | -264.5  |
| c3mim-cl-p2    | -30.0 | -11.3 | -940.7  | -2819.0 | -836.0 | -2553.0 | -91.5   | -249.2  | -836.3 | -2553.8 | -96.0   | -262.4  |
| c3mim-cl-p3    | -31.9 | -11.9 | -941.1  | -2819.6 | -835.6 | -2552.5 | -91.5   | -249.2  | -835.9 | -2553.2 | -96.6   | -263.3  |
| c3mim-cl-p4    | -37.7 | -14.1 | -941.3  | -2823.3 | -835.2 | -2550.9 | -91.5   | -249.2  | -836.0 | -2552.6 | -97.3   | -264.6  |
| c3mim-dca-p1   | -60.8 | -41.6 | -1388.6 | -3952.4 | -833.9 | -2542.5 | -528.1  | -1375.7 | -835.3 | -2545.8 | -532.8  | -1385.5 |
| c3mim-dca-p2   | -61.0 | -41.7 | -1389.0 | -3952.8 | -834.2 | -2542.9 | -528.1  | -1375.6 | -835.7 | -2546.3 | -532.9  | -1385.2 |
| c3mim-dca-p3   | -53.6 | -35.7 | -1386.1 | -3948.8 | -834.2 | -2543.5 | -528.0  | -1375.6 | -835.3 | -2546.0 | -532.5  | -1385.5 |
| c3mim-dca-p4   | -62.8 | -42.7 | -1390.1 | -3953.1 | -834.1 | -2542.7 | -528.1  | -1375.4 | -835.5 | -2546.0 | -533.2  | -1385.8 |
| c3mim-dca-p5   | -59.1 | -40.2 | -1387.2 | -3950.8 | -833.6 | -2541.9 | -528.1  | -1375.4 | -835.0 | -2545.3 | -532.6  | -1385.0 |
| c3mim-dca-p6   | -57.5 | -39.0 | -1386.7 | -3950.0 | -833.6 | -2541.9 | -528.3  | -1375.5 | -835.0 | -2545.2 | -532.7  | -1384.9 |
| c3mim-mes-p1   | -53.9 | -23.0 | -1456.7 | -4185.1 | -834.6 | -2543.3 | -598.4  | -1611.6 | -835.8 | -2546.0 | -607.3  | -1629.7 |
| c3mim-mes-p2   | -47.2 | -19.6 | -1452.6 | -4180.5 | -833.8 | -2541.9 | -598.4  | -1611.7 | -834.8 | -2544.4 | -606.4  | -1627.9 |
| c3mim-ntf2-p1  | -78.5 | -48.4 | -2763.5 | -7390.2 | -834.1 | -2542.4 | -1895.9 | -4802.8 | -835.6 | -2545.8 | -1904.2 | -4819.8 |
| c3mim-ntf2-p2  | -55.9 | -32.0 | -2754.5 | -7376.2 | -834.1 | -2543.7 | -1895.3 | -4801.7 | -834.9 | -2545.6 | -1902.2 | -4816.0 |
| c3mim-ntf2-p3  | -46.8 | -22.9 | -2750.8 | -7369.9 | -833.8 | -2542.8 | -1895.7 | -4801.7 | -834.7 | -2545.0 | -1902.4 | -4815.6 |
| c3mim-ntf2-p4  | -65.9 | -41.3 | -2758.0 | -7383.1 | -833.7 | -2541.6 | -1896.3 | -4803.6 | -834.8 | -2544.5 | -1903.1 | -4817.4 |
| c3mim-pf6-p1   | -43.3 | -18.9 | -1770.6 | -4927.8 | -833.7 | -2541.7 | -919.9  | -2359.7 | -834.6 | -2544.0 | -926.8  | -2374.0 |
| c3mim-pf6-p2   | -38.9 | -16.7 | -1768.6 | -4924.9 | -833.5 | -2541.3 | -919.9  | -2359.9 | -834.3 | -2543.4 | -926.3  | -2372.9 |
| c3mim-tos-p1   | -53.1 | -21.8 | -2011.3 | -5669.7 | -834.6 | -2543.2 | -1153.3 | -3096.9 | -835.7 | -2546.0 | -1162.5 | -3115.1 |
| c3mim-tos-p2   | -50.3 | -20.9 | -2009.3 | -5667.3 | -833.9 | -2542.0 | -1153.4 | -3097.0 | -835.0 | -2544.8 | -1161.8 | -3114.1 |



|                |       |       |         |         |        |         |         |         |        |         |         |         |
|----------------|-------|-------|---------|---------|--------|---------|---------|---------|--------|---------|---------|---------|
| c3mpyr-bf4-p1  | -37.5 | -16.4 | -1419.8 | -4230.9 | -794.9 | -2641.5 | -609.5  | -1567.2 | -795.7 | -2643.4 | -615.3  | -1579.9 |
| c3mpyr-bf4-p2  | -35.2 | -15.5 | -1419.2 | -4229.8 | -795.2 | -2641.8 | -609.5  | -1567.2 | -795.9 | -2643.5 | -614.8  | -1579.2 |
| c3mpyr-bf4-p3  | -34.3 | -15.6 | -1418.6 | -4229.1 | -794.9 | -2641.8 | -609.5  | -1567.2 | -795.7 | -2643.4 | -614.5  | -1578.5 |
| c3mpyr-br-p1   | -42.6 | -27.6 | -1010.7 | -3075.1 | -795.4 | -2642.6 | -196.3  | -408.9  | -795.9 | -2643.7 | -200.0  | -418.6  |
| c3mpyr-br-p2   | -40.2 | -26.0 | -1009.5 | -3074.0 | -795.4 | -2642.7 | -196.3  | -408.9  | -795.8 | -2643.7 | -199.8  | -418.1  |
| c3mpyr-br-p3   | -40.5 | -26.3 | -1009.6 | -3074.2 | -795.3 | -2642.7 | -196.3  | -408.9  | -795.8 | -2643.7 | -199.8  | -418.2  |
| c3mpyr-cl-p1   | -41.3 | -21.3 | -904.0  | -2916.2 | -795.5 | -2642.7 | -91.5   | -249.2  | -795.8 | -2643.5 | -96.5   | -263.0  |
| c3mpyr-cl-p2   | -40.1 | -20.9 | -903.3  | -2915.6 | -795.3 | -2642.9 | -91.5   | -249.2  | -795.6 | -2643.7 | -96.2   | -262.5  |
| c3mpyr-cl-p3   | -39.7 | -20.7 | -903.2  | -2915.5 | -795.4 | -2642.8 | -91.5   | -249.2  | -795.8 | -2643.5 | -96.1   | -262.5  |
| c3mpyr-dca-p1  | -42.7 | -27.8 | -1337.0 | -4024.8 | -795.1 | -2642.0 | -522.2  | -1359.8 | -795.9 | -2643.7 | -526.2  | -1368.2 |
| c3mpyr-dca-p2  | -45.3 | -29.9 | -1337.8 | -4026.5 | -795.0 | -2641.9 | -522.1  | -1360.0 | -795.8 | -2643.8 | -526.3  | -1368.5 |
| c3mpyr-dca-p3  | -40.1 | -26.5 | -1334.4 | -4025.4 | -795.1 | -2641.9 | -522.3  | -1360.6 | -795.8 | -2643.5 | -525.8  | -1368.3 |
| c3mpyr-dca-p4  | -43.3 | -29.0 | -1336.7 | -4025.6 | -795.2 | -2642.0 | -522.0  | -1359.8 | -796.0 | -2643.9 | -525.8  | -1367.6 |
| c3mpyr-dca-p5  | -45.8 | -30.5 | -1337.8 | -4027.0 | -795.1 | -2641.9 | -522.0  | -1359.9 | -795.9 | -2643.9 | -526.1  | -1368.3 |
| c3mpyr-mes-p1  | -47.8 | -20.2 | -1414.6 | -4281.6 | -794.9 | -2641.8 | -598.5  | -1613.2 | -795.7 | -2643.7 | -606.7  | -1629.9 |
| c3mpyr-mes-p2  | -43.4 | -18.1 | -1413.3 | -4279.6 | -795.4 | -2642.2 | -598.5  | -1613.3 | -796.1 | -2643.9 | -606.1  | -1628.7 |
| c3mpyr-mes-p3  | -42.9 | -18.4 | -1412.9 | -4279.1 | -795.0 | -2642.4 | -598.5  | -1613.2 | -795.9 | -2644.2 | -605.6  | -1628.0 |
| c3mpyr-ntf2-p1 | -55.4 | -33.3 | -2713.8 | -7476.4 | -795.2 | -2641.7 | -1895.0 | -4803.0 | -796.0 | -2643.5 | -1901.3 | -4816.0 |
| c3mpyr-ntf2-p2 | -41.2 | -22.8 | -2708.0 | -7465.7 | -794.9 | -2641.5 | -1894.6 | -4801.6 | -795.6 | -2642.9 | -1900.0 | -4812.5 |
| c3mpyr-ntf2-p3 | -52.6 | -31.5 | -2712.6 | -7474.4 | -794.9 | -2641.5 | -1895.0 | -4803.0 | -795.6 | -2643.0 | -1901.2 | -4815.6 |
| c3mpyr-ntf2-p4 | -53.0 | -32.1 | -2712.7 | -7474.6 | -795.0 | -2641.6 | -1894.9 | -4802.8 | -795.7 | -2643.3 | -1901.0 | -4815.2 |
| c3mpyr-ntf2-p5 | -43.8 | -23.7 | -2708.5 | -7467.3 | -794.7 | -2641.3 | -1894.5 | -4801.4 | -795.4 | -2642.8 | -1900.4 | -4813.4 |
| c3mpyr-ntf2-p6 | -44.1 | -23.4 | -2709.0 | -7467.9 | -795.0 | -2641.6 | -1894.7 | -4801.5 | -795.6 | -2643.0 | -1900.8 | -4814.0 |
| c3mpyr-pf6-p1  | -40.0 | -17.8 | -1731.2 | -5025.2 | -794.8 | -2641.4 | -920.0  | -2360.2 | -795.4 | -2642.8 | -926.5  | -2373.8 |
| c3mpyr-pf6-p2  | -36.8 | -16.5 | -1730.2 | -5023.5 | -795.0 | -2641.6 | -920.1  | -2360.3 | -795.6 | -2642.9 | -926.0  | -2372.7 |
| c3mpyr-pf6-p3  | -36.9 | -16.7 | -1730.1 | -5023.6 | -794.9 | -2641.6 | -920.1  | -2360.3 | -795.5 | -2642.8 | -926.0  | -2372.7 |
| c3mpyr-tos-p1  | -44.6 | -17.6 | -1967.8 | -5764.0 | -794.8 | -2641.8 | -1152.7 | -3097.7 | -795.7 | -2643.7 | -1160.8 | -3113.9 |
| c3mpyr-tos-p2  | -40.5 | -15.6 | -1966.5 | -5762.1 | -795.4 | -2642.2 | -1152.8 | -3097.8 | -796.1 | -2643.9 | -1160.2 | -3112.8 |
| c4mim-bf4-p1   | -38.4 | -14.8 | -1545.8 | -4423.0 | -920.9 | -2831.0 | -609.8  | -1568.6 | -922.0 | -2833.7 | -616.1  | -1582.2 |
| c4mim-bf4-p2   | -37.2 | -15.0 | -1545.0 | -4421.8 | -920.7 | -2830.5 | -609.8  | -1568.6 | -921.8 | -2833.1 | -615.7  | -1581.3 |
| c4mim-br-p1    | -40.3 | -22.8 | -1135.9 | -3272.4 | -922.2 | -2840.7 | -196.3  | -408.9  | -923.1 | -2842.6 | -200.3  | -419.6  |
| c4mim-br-p2    | -29.7 | -15.7 | -1133.0 | -3266.2 | -922.5 | -2841.9 | -196.3  | -408.9  | -923.0 | -2842.9 | -199.6  | -418.0  |
| c4mim-br-p3    | -32.9 | -18.1 | -1134.1 | -3267.7 | -922.2 | -2841.5 | -196.3  | -408.9  | -922.6 | -2842.4 | -200.0  | -418.8  |
| c4mim-br-p4    | -41.1 | -23.4 | -1136.0 | -3272.9 | -922.1 | -2840.5 | -196.3  | -408.9  | -923.0 | -2842.5 | -200.3  | -419.7  |
| c4mim-cl-p1    | -37.7 | -14.3 | -1028.3 | -3112.6 | -922.0 | -2840.4 | -91.5   | -249.2  | -922.8 | -2842.1 | -97.1   | -264.7  |
| c4mim-cl-p2    | -30.7 | -11.6 | -1027.7 | -3108.9 | -922.7 | -2842.5 | -91.5   | -249.2  | -923.1 | -2843.3 | -96.1   | -262.6  |
| c4mim-cl-p3    | -32.9 | -12.4 | -1028.3 | -3109.7 | -922.4 | -2842.0 | -91.5   | -249.2  | -922.6 | -2842.6 | -96.7   | -263.6  |
| c4mim-cl-p4    | -38.1 | -14.4 | -1028.1 | -3112.8 | -921.9 | -2840.2 | -91.5   | -249.2  | -922.7 | -2841.8 | -97.3   | -264.7  |
| c4mim-dca-p1   | -61.6 | -42.1 | -1475.7 | -4241.7 | -920.7 | -2831.3 | -528.1  | -1375.8 | -922.2 | -2834.6 | -532.9  | -1385.7 |



|                |       |       |         |         |        |         |         |         |        |         |         |         |
|----------------|-------|-------|---------|---------|--------|---------|---------|---------|--------|---------|---------|---------|
| c4mim-dca-p2   | -64.4 | -43.7 | -1477.6 | -4242.9 | -920.9 | -2831.6 | -528.1  | -1375.5 | -922.4 | -2834.9 | -533.3  | -1386.1 |
| c4mim-dca-p3   | -59.4 | -40.4 | -1474.1 | -4239.8 | -920.3 | -2830.6 | -528.0  | -1375.5 | -921.7 | -2833.9 | -532.7  | -1385.1 |
| c4mim-mes-p1   | -55.2 | -23.7 | -1544.0 | -4474.7 | -921.4 | -2832.1 | -598.4  | -1611.6 | -922.6 | -2834.8 | -607.5  | -1630.0 |
| c4mim-mes-p2   | -47.3 | -19.6 | -1539.3 | -4469.2 | -920.5 | -2830.5 | -598.4  | -1611.8 | -921.5 | -2833.0 | -606.4  | -1628.0 |
| c4mim-pf6-p1   | -46.3 | -18.8 | -1859.2 | -5218.8 | -920.8 | -2831.1 | -919.9  | -2359.8 | -921.8 | -2833.5 | -927.9  | -2376.0 |
| c4mim-pf6-p2   | -39.0 | -16.7 | -1855.3 | -5213.6 | -920.2 | -2829.9 | -919.9  | -2359.9 | -921.0 | -2832.0 | -926.3  | -2372.9 |
| c4mim-tos-p1   | -55.2 | -23.2 | -2099.1 | -5959.8 | -921.4 | -2832.1 | -1153.3 | -3096.9 | -922.6 | -2835.0 | -1162.7 | -3115.5 |
| c4mim-tos-p2   | -50.9 | -21.8 | -2097.0 | -5956.7 | -921.1 | -2831.4 | -1153.3 | -3096.9 | -922.3 | -2834.2 | -1161.7 | -3113.6 |
| c4mpyr-bf4-p1  | -37.7 | -16.4 | -1506.5 | -4520.0 | -881.5 | -2930.6 | -609.5  | -1567.2 | -882.4 | -2932.4 | -615.3  | -1580.0 |
| c4mpyr-bf4-p2  | -35.4 | -15.6 | -1505.8 | -4519.0 | -881.8 | -2930.9 | -609.5  | -1567.2 | -882.6 | -2932.6 | -614.8  | -1579.2 |
| c4mpyr-bf4-p3  | -34.5 | -15.7 | -1505.4 | -4518.4 | -881.7 | -2930.9 | -609.5  | -1567.2 | -882.4 | -2932.5 | -614.6  | -1578.6 |
| c4mpyr-br-p1   | -42.8 | -27.7 | -1097.4 | -3364.3 | -882.1 | -2931.7 | -196.3  | -408.9  | -882.6 | -2932.7 | -200.0  | -418.7  |
| c4mpyr-br-p2   | -40.4 | -26.2 | -1096.2 | -3363.2 | -882.0 | -2931.8 | -196.3  | -408.9  | -882.5 | -2932.9 | -199.8  | -418.1  |
| c4mpyr-br-p3   | -40.8 | -26.4 | -1096.4 | -3363.4 | -882.1 | -2931.8 | -196.3  | -408.9  | -882.5 | -2932.8 | -199.8  | -418.3  |
| c4mpyr-cl-p1   | -41.3 | -21.3 | -990.6  | -3205.3 | -882.1 | -2931.7 | -91.5   | -249.2  | -882.5 | -2932.5 | -96.5   | -263.0  |
| c4mpyr-cl-p2   | -40.9 | -21.3 | -990.3  | -3205.3 | -881.9 | -2932.1 | -91.5   | -249.2  | -882.3 | -2932.9 | -96.3   | -262.8  |
| c4mpyr-cl-p3   | -39.7 | -20.7 | -989.9  | -3204.5 | -882.1 | -2931.9 | -91.5   | -249.2  | -882.5 | -2932.6 | -96.1   | -262.5  |
| c4mpyr-dca-p1  | -43.5 | -29.1 | -1423.0 | -4315.0 | -881.7 | -2930.7 | -522.1  | -1360.1 | -882.7 | -2932.8 | -525.8  | -1367.6 |
| c4mpyr-dca-p2  | -45.4 | -30.0 | -1424.5 | -4315.7 | -881.7 | -2931.0 | -522.1  | -1360.0 | -882.5 | -2932.9 | -526.3  | -1368.5 |
| c4mpyr-dca-p3  | -43.5 | -28.2 | -1423.8 | -4314.3 | -881.7 | -2930.9 | -522.1  | -1359.8 | -882.5 | -2932.7 | -526.3  | -1368.4 |
| c4mpyr-dca-p4  | -44.6 | -29.9 | -1423.8 | -4315.4 | -881.6 | -2930.9 | -522.1  | -1359.9 | -882.6 | -2932.8 | -526.0  | -1367.9 |
| c4mpyr-dca-p5  | -46.0 | -30.7 | -1424.5 | -4316.2 | -881.8 | -2931.0 | -522.1  | -1359.9 | -882.6 | -2932.9 | -526.1  | -1368.4 |
| c4mpyr-mes-p1  | -47.8 | -20.2 | -1501.3 | -4570.7 | -881.5 | -2930.9 | -598.5  | -1613.2 | -882.4 | -2932.7 | -606.8  | -1629.9 |
| c4mpyr-mes-p2  | -43.8 | -18.4 | -1500.1 | -4569.0 | -882.1 | -2931.4 | -598.5  | -1613.3 | -882.8 | -2933.1 | -606.1  | -1628.8 |
| c4mpyr-mes-p3  | -43.1 | -18.5 | -1499.7 | -4568.4 | -881.7 | -2931.5 | -598.5  | -1613.2 | -882.6 | -2933.3 | -605.7  | -1628.0 |
| c4mpyr-ntf2-p1 | -55.5 | -33.5 | -2800.5 | -7765.3 | -881.8 | -2930.7 | -1895.0 | -4802.9 | -882.7 | -2932.6 | -1901.3 | -4815.8 |
| c4mpyr-ntf2-p2 | -47.0 | -25.8 | -2796.7 | -7758.0 | -881.6 | -2930.4 | -1894.5 | -4801.2 | -882.3 | -2932.0 | -1900.8 | -4813.8 |
| c4mpyr-ntf2-p3 | -53.8 | -32.2 | -2799.9 | -7764.2 | -881.6 | -2930.7 | -1895.0 | -4803.0 | -882.3 | -2932.4 | -1901.3 | -4815.9 |
| c4mpyr-ntf2-p4 | -54.0 | -32.9 | -2799.9 | -7764.3 | -881.7 | -2930.7 | -1894.9 | -4802.9 | -882.4 | -2932.4 | -1901.1 | -4815.4 |
| c4mpyr-ntf2-p5 | -44.3 | -24.1 | -2795.3 | -7756.6 | -881.4 | -2930.4 | -1894.5 | -4801.4 | -882.0 | -2931.9 | -1900.4 | -4813.4 |
| c4mpyr-ntf2-p6 | -45.3 | -24.3 | -2796.2 | -7757.5 | -881.7 | -2930.7 | -1894.6 | -4801.4 | -882.4 | -2932.1 | -1900.8 | -4814.0 |
| c4mpyr-pf6-p1  | -40.0 | -17.9 | -1817.9 | -5314.4 | -881.5 | -2930.5 | -920.1  | -2360.2 | -882.1 | -2931.9 | -926.6  | -2373.8 |
| c4mpyr-pf6-p2  | -37.1 | -16.7 | -1817.0 | -5312.9 | -881.7 | -2930.7 | -920.1  | -2360.3 | -882.3 | -2932.1 | -926.0  | -2372.8 |
| c4mpyr-pf6-p3  | -37.1 | -16.8 | -1816.8 | -5312.9 | -881.6 | -2930.7 | -920.1  | -2360.3 | -882.2 | -2932.0 | -926.0  | -2372.8 |
| c4mpyr-tos-p1  | -44.9 | -17.8 | -2054.7 | -6053.4 | -881.6 | -2931.0 | -1152.8 | -3097.8 | -882.4 | -2932.8 | -1160.9 | -3114.1 |
| c4mpyr-tos-p2  | -41.1 | -16.0 | -2053.5 | -6051.8 | -882.1 | -2931.3 | -1152.9 | -3097.9 | -882.8 | -2933.0 | -1160.4 | -3113.0 |



### 2.2.3 KTZVP basis set

Table S 4: Raw KTZVP energies. Superscript \* indicates monomer calculated in the dimer basis set.

| ion pair       | E(int) | E(int) CP | E(dimer) SS | E(dimer) OS | E(A) SS | E(A) OS | E(B) SS | E(B) OS | E(A) SS* | E(A) OS* | E(B) SS* | E(B) OS* |
|----------------|--------|-----------|-------------|-------------|---------|---------|---------|---------|----------|----------|----------|----------|
| c1mim-bf4-p1   | -33.4  | -24.0     | -1570.5     | -4522.9     | -775.6  | -2356.2 | -780.1  | -2148.2 | -776.2   | -2358.3  | -782.0   | -2152.9  |
| c1mim-br-p1    | -45.5  | -36.6     | -1025.0     | -2901.4     | -777.7  | -2364.6 | -226.1  | -512.7  | -778.0   | -2365.6  | -227.8   | -518.5   |
| c1mim-br-p2    | -27.2  | -21.3     | -1017.4     | -2890.8     | -777.4  | -2364.8 | -226.1  | -512.7  | -777.5   | -2365.2  | -227.2   | -517.0   |
| c1mim-cl-p1    | -40.6  | -29.8     | -925.0      | -2768.3     | -777.5  | -2364.2 | -129.1  | -381.9  | -777.7   | -2365.1  | -131.4   | -389.3   |
| c1mim-cl-p2    | -27.9  | -20.0     | -920.7      | -2761.2     | -777.6  | -2365.4 | -129.1  | -381.9  | -777.7   | -2365.8  | -130.7   | -387.7   |
| c1mim-dca-p1   | -61.7  | -53.3     | -1427.4     | -4095.5     | -776.1  | -2357.5 | -622.7  | -1705.0 | -776.7   | -2359.6  | -624.3   | -1709.0  |
| c1mim-dca-p2   | -43.2  | -37.6     | -1419.6     | -4085.9     | -776.2  | -2358.7 | -622.4  | -1705.0 | -776.5   | -2359.8  | -623.5   | -1708.1  |
| c1mim-mes-p1   | -46.7  | -33.7     | -1543.7     | -4467.5     | -776.1  | -2357.0 | -745.4  | -2086.0 | -776.6   | -2359.0  | -748.8   | -2093.1  |
| c1mim-ntf2-p1  | -72.7  | -59.0     | -3181.8     | -8766.2     | -775.7  | -2356.3 | -2373.4 | -6369.9 | -776.4   | -2359.3  | -2376.3  | -6376.9  |
| c1mim-ntf2-p2  | -38.1  | -30.4     | -3167.3     | -8745.8     | -776.0  | -2358.2 | -2372.6 | -6368.2 | -776.3   | -2359.4  | -2374.4  | -6372.7  |
| c1mim-ntf2-p3  | -41.8  | -31.8     | -3169.5     | -8747.5     | -775.7  | -2357.1 | -2373.4 | -6369.0 | -776.3   | -2359.3  | -2375.5  | -6374.2  |
| c1mim-pf6-p1   | -36.4  | -25.7     | -1979.0     | -5619.3     | -775.6  | -2356.3 | -1187.2 | -3242.8 | -776.1   | -2358.2  | -1189.8  | -3248.4  |
| c1mim-tos-p1   | -44.0  | -31.6     | -2188.1     | -6256.9     | -775.8  | -2356.8 | -1391.3 | -3877.2 | -776.4   | -2358.9  | -1394.3  | -3883.8  |
| c1mpyr-bf4-p1  | -32.1  | -24.0     | -1526.4     | -4601.8     | -731.6  | -2438.1 | -779.7  | -2146.6 | -732.0   | -2439.6  | -781.6   | -2151.0  |
| c1mpyr-bf4-p2  | -28.9  | -22.1     | -1525.1     | -4600.3     | -731.8  | -2438.4 | -779.7  | -2146.6 | -732.1   | -2439.5  | -781.3   | -2150.4  |
| c1mpyr-br-p1   | -44.7  | -37.4     | -979.6      | -2975.5     | -732.3  | -2439.3 | -226.1  | -512.7  | -732.5   | -2439.9  | -227.6   | -517.7   |
| c1mpyr-br-p2   | -42.0  | -35.4     | -978.3      | -2974.4     | -732.3  | -2439.6 | -226.1  | -512.7  | -732.4   | -2440.1  | -227.4   | -517.3   |
| c1mpyr-cl-p1   | -42.1  | -33.0     | -880.9      | -2843.9     | -732.4  | -2439.4 | -129.1  | -381.9  | -732.5   | -2439.9  | -131.2   | -388.3   |
| c1mpyr-cl-p2   | -40.4  | -31.8     | -880.1      | -2843.2     | -732.3  | -2439.6 | -129.1  | -381.9  | -732.4   | -2440.0  | -131.0   | -388.0   |
| c1mpyr-dca-p1  | -41.7  | -35.5     | -1369.4     | -4150.4     | -732.2  | -2439.0 | -616.7  | -1690.2 | -732.5   | -2440.2  | -618.1   | -1693.4  |
| c1mpyr-dca-p2  | -45.2  | -39.0     | -1370.4     | -4152.6     | -732.0  | -2438.6 | -616.7  | -1690.5 | -732.3   | -2439.9  | -618.1   | -1693.7  |
| c1mpyr-dca-p3  | -42.6  | -36.7     | -1367.6     | -4152.8     | -731.7  | -2438.4 | -616.6  | -1691.0 | -732.1   | -2439.8  | -617.7   | -1694.0  |
| c1mpyr-dca-p4  | -43.9  | -37.6     | -1369.5     | -4151.8     | -731.7  | -2438.4 | -616.7  | -1690.5 | -732.1   | -2439.8  | -618.1   | -1693.7  |
| c1mpyr-mes-p1  | -41.2  | -30.0     | -1497.5     | -4546.6     | -731.6  | -2438.5 | -745.5  | -2087.3 | -732.0   | -2440.0  | -748.5   | -2093.6  |
| c1mpyr-mes-p2  | -35.3  | -26.1     | -1495.1     | -4543.7     | -731.9  | -2439.0 | -745.5  | -2087.2 | -732.1   | -2440.1  | -747.9   | -2092.6  |
| c1mpyr-ntf2-p1 | -48.9  | -39.7     | -3126.0     | -8834.0     | -732.0  | -2438.3 | -2371.8 | -6369.1 | -732.4   | -2440.0  | -2373.9  | -6374.1  |
| c1mpyr-ntf2-p2 | -36.3  | -28.6     | -3120.9     | -8825.2     | -731.7  | -2438.0 | -2371.8 | -6368.2 | -732.1   | -2439.6  | -2373.5  | -6372.3  |
| c1mpyr-ntf2-p3 | -46.9  | -38.4     | -3125.3     | -8832.5     | -732.0  | -2438.4 | -2371.7 | -6368.8 | -732.3   | -2439.9  | -2373.7  | -6373.6  |
| c1mpyr-ntf2-p5 | -37.4  | -29.6     | -3121.6     | -8825.6     | -731.9  | -2438.2 | -2371.7 | -6367.9 | -732.3   | -2439.8  | -2373.4  | -6372.1  |
| c1mpyr-pf6-p1  | -32.3  | -23.8     | -1934.0     | -5698.5     | -731.6  | -2438.1 | -1187.3 | -3243.1 | -731.9   | -2439.4  | -1189.5  | -3247.9  |
| c1mpyr-pf6-p2  | -29.2  | -21.9     | -1932.7     | -5697.1     | -731.8  | -2438.3 | -1187.4 | -3243.3 | -732.0   | -2439.2  | -1189.3  | -3247.4  |
| c1mpyr-tos-p1  | -38.2  | -27.5     | -2141.7     | -6335.4     | -731.7  | -2438.5 | -1390.7 | -3878.0 | -732.0   | -2440.1  | -1393.5  | -3884.0  |
| c1mpyr-tos-p2  | -32.9  | -23.6     | -2139.1     | -6333.0     | -731.8  | -2438.7 | -1390.7 | -3878.0 | -732.1   | -2439.9  | -1393.2  | -3883.3  |



|               |       |       |         |         |        |         |         |         |        |         |         |         |
|---------------|-------|-------|---------|---------|--------|---------|---------|---------|--------|---------|---------|---------|
| c2mim-bf4-p1  | -35.3 | -25.2 | -1675.2 | -4865.0 | -879.3 | -2697.5 | -780.1  | -2148.1 | -879.9 | -2699.7 | -782.2  | -2153.2 |
| c2mim-bf4-p2  | -33.0 | -23.6 | -1673.7 | -4863.4 | -878.9 | -2696.9 | -780.1  | -2148.2 | -879.5 | -2699.1 | -782.0  | -2152.9 |
| c2mim-br-p1   | -46.5 | -37.4 | -1128.6 | -3242.9 | -880.8 | -2705.4 | -226.1  | -512.7  | -881.1 | -2706.4 | -227.9  | -518.6  |
| c2mim-br-p2   | -31.0 | -24.3 | -1123.5 | -3235.4 | -881.7 | -2707.4 | -226.1  | -512.7  | -881.8 | -2707.9 | -227.4  | -517.4  |
| c2mim-br-p3   | -31.9 | -24.9 | -1123.0 | -3235.2 | -881.0 | -2706.6 | -226.1  | -512.7  | -881.2 | -2707.2 | -227.5  | -517.5  |
| c2mim-br-p4   | -47.0 | -37.9 | -1129.4 | -3244.1 | -881.4 | -2706.4 | -226.1  | -512.7  | -881.7 | -2707.4 | -227.9  | -518.6  |
| c2mim-cl-p1   | -41.8 | -30.6 | -1028.8 | -3110.0 | -880.7 | -2705.3 | -129.1  | -381.9  | -881.0 | -2706.1 | -131.5  | -389.5  |
| c2mim-cl-p2   | -30.6 | -21.9 | -1026.2 | -3105.3 | -881.9 | -2708.0 | -129.1  | -381.9  | -882.1 | -2708.5 | -130.9  | -388.2  |
| c2mim-cl-p3   | -31.5 | -22.5 | -1025.8 | -3105.1 | -881.2 | -2707.2 | -129.1  | -381.9  | -881.4 | -2707.7 | -131.0  | -388.4  |
| c2mim-cl-p4   | -41.7 | -30.7 | -1029.1 | -3110.7 | -881.2 | -2706.0 | -129.1  | -381.9  | -881.4 | -2706.8 | -131.5  | -389.4  |
| c2mim-dca-p1  | -63.6 | -54.7 | -1531.2 | -4437.6 | -879.2 | -2697.9 | -622.6  | -1705.4 | -879.9 | -2700.2 | -624.3  | -1709.7 |
| c2mim-dca-p2  | -59.4 | -51.1 | -1529.8 | -4434.8 | -879.4 | -2697.9 | -622.6  | -1705.2 | -880.0 | -2700.0 | -624.2  | -1709.2 |
| c2mim-dca-p3  | -63.7 | -54.8 | -1532.2 | -4437.7 | -879.8 | -2698.4 | -622.8  | -1705.2 | -880.4 | -2700.7 | -624.4  | -1709.5 |
| c2mim-dca-p4  | -60.5 | -52.2 | -1530.1 | -4435.5 | -879.3 | -2698.0 | -622.6  | -1705.2 | -879.9 | -2700.1 | -624.2  | -1709.1 |
| c2mim-dca-p5  | -62.0 | -53.4 | -1530.8 | -4436.4 | -879.3 | -2698.1 | -622.7  | -1705.0 | -879.9 | -2700.4 | -624.3  | -1709.1 |
| c2mim-dca-p6  | -62.5 | -53.9 | -1530.5 | -4436.6 | -879.2 | -2697.7 | -622.7  | -1705.1 | -879.8 | -2699.9 | -624.3  | -1709.2 |
| c2mim-mes-p1  | -52.0 | -38.1 | -1650.1 | -4811.7 | -880.0 | -2698.6 | -745.4  | -2085.8 | -880.6 | -2700.8 | -748.9  | -2093.5 |
| c2mim-mes-p2  | -47.5 | -34.1 | -1647.1 | -4808.7 | -879.3 | -2697.6 | -745.5  | -2086.0 | -879.8 | -2699.7 | -748.9  | -2093.3 |
| c2mim-ntf2-p1 | -79.4 | -63.9 | -3288.5 | -9111.1 | -879.4 | -2697.6 | -2373.4 | -6369.9 | -880.2 | -2700.9 | -2376.7 | -6377.8 |
| c2mim-ntf2-p2 | -49.0 | -38.9 | -3275.9 | -9094.1 | -879.6 | -2699.3 | -2373.0 | -6369.1 | -880.1 | -2701.1 | -2375.2 | -6374.8 |
| c2mim-ntf2-p3 | -44.7 | -34.1 | -3274.5 | -9089.9 | -879.2 | -2698.1 | -2373.4 | -6369.0 | -879.8 | -2700.4 | -2375.6 | -6374.5 |
| c2mim-ntf2-p4 | -69.2 | -55.6 | -3284.3 | -9105.6 | -879.3 | -2697.7 | -2373.6 | -6370.2 | -880.1 | -2700.7 | -2376.5 | -6377.1 |
| c2mim-pf6-p1  | -40.3 | -28.4 | -2084.4 | -5962.4 | -879.2 | -2697.4 | -1187.2 | -3242.8 | -879.7 | -2699.5 | -1190.1 | -3249.1 |
| c2mim-pf6-p2  | -36.8 | -26.0 | -2082.3 | -5960.2 | -878.8 | -2696.8 | -1187.2 | -3242.8 | -879.4 | -2698.8 | -1189.9 | -3248.5 |
| c2mim-tos-p1  | -51.1 | -37.3 | -2295.5 | -6602.0 | -879.9 | -2698.4 | -1391.2 | -3877.0 | -880.5 | -2700.8 | -1394.6 | -3884.4 |
| c2mim-tos-p2  | -45.3 | -32.4 | -2292.2 | -6598.5 | -879.2 | -2697.7 | -1391.2 | -3877.1 | -879.9 | -2699.9 | -1394.4 | -3884.0 |
| c2mpyr-bf4-p1 | -33.0 | -24.5 | -1632.0 | -4946.4 | -836.9 | -2782.1 | -779.7  | -2146.6 | -837.3 | -2783.8 | -781.6  | -2151.2 |
| c2mpyr-bf4-p2 | -30.6 | -23.0 | -1631.5 | -4945.7 | -837.4 | -2782.7 | -779.7  | -2146.7 | -837.7 | -2784.1 | -781.5  | -2150.9 |
| c2mpyr-bf4-p3 | -30.0 | -22.7 | -1630.8 | -4945.0 | -837.0 | -2782.5 | -779.7  | -2146.6 | -837.4 | -2783.7 | -781.4  | -2150.7 |
| c2mpyr-br-p1  | -46.0 | -38.3 | -1085.3 | -3320.2 | -837.6 | -2783.2 | -226.1  | -512.7  | -837.7 | -2783.9 | -227.7  | -517.9  |
| c2mpyr-br-p2  | -43.8 | -36.6 | -1084.3 | -3319.6 | -837.5 | -2783.8 | -226.1  | -512.7  | -837.7 | -2784.4 | -227.6  | -517.6  |
| c2mpyr-br-p3  | -43.2 | -36.2 | -1083.9 | -3318.9 | -837.5 | -2783.4 | -226.1  | -512.7  | -837.6 | -2784.0 | -227.5  | -517.5  |
| c2mpyr-cl-p1  | -43.0 | -33.5 | -986.5  | -3188.4 | -837.6 | -2783.3 | -129.1  | -381.9  | -837.8 | -2783.8 | -131.2  | -388.5  |
| c2mpyr-cl-p2  | -41.4 | -32.3 | -985.6  | -3187.8 | -837.4 | -2783.6 | -129.1  | -381.9  | -837.5 | -2784.0 | -131.2  | -388.3  |
| c2mpyr-cl-p3  | -41.0 | -32.2 | -985.5  | -3187.5 | -837.6 | -2783.5 | -129.1  | -381.9  | -837.7 | -2783.9 | -131.1  | -388.1  |
| c2mpyr-dca-p1 | -42.0 | -35.7 | -1474.7 | -4494.6 | -837.4 | -2782.9 | -616.8  | -1690.2 | -837.7 | -2784.2 | -618.1  | -1693.5 |
| c2mpyr-dca-p2 | -45.3 | -38.7 | -1475.7 | -4496.5 | -837.0 | -2782.5 | -616.8  | -1690.6 | -837.4 | -2783.9 | -618.3  | -1694.0 |
| c2mpyr-dca-p3 | -45.7 | -39.4 | -1475.7 | -4496.9 | -837.1 | -2782.6 | -616.7  | -1690.5 | -837.5 | -2783.9 | -618.1  | -1693.8 |
| c2mpyr-mes-p1 | -43.1 | -31.1 | -1603.4 | -4891.8 | -836.9 | -2782.5 | -745.5  | -2087.3 | -837.3 | -2784.1 | -748.6  | -2094.0 |



|                |       |       |         |         |        |         |         |         |        |         |         |         |
|----------------|-------|-------|---------|---------|--------|---------|---------|---------|--------|---------|---------|---------|
| c2mpyr-mes-p2  | -39.4 | -28.5 | -1602.4 | -4890.5 | -837.6 | -2783.1 | -745.5  | -2087.4 | -837.9 | -2784.5 | -748.4  | -2093.6 |
| c2mpyr-mes-p3  | -37.5 | -27.4 | -1601.2 | -4889.1 | -837.1 | -2783.0 | -745.5  | -2087.3 | -837.5 | -2784.3 | -748.2  | -2093.1 |
| c2mpyr-ntf2-p1 | -50.2 | -40.5 | -3232.1 | -9178.7 | -837.3 | -2782.2 | -2371.9 | -6369.2 | -837.8 | -2784.1 | -2374.1 | -6374.3 |
| c2mpyr-ntf2-p2 | -38.8 | -30.5 | -3227.3 | -9170.7 | -836.9 | -2782.0 | -2371.9 | -6368.4 | -837.3 | -2783.7 | -2373.7 | -6372.8 |
| c2mpyr-ntf2-p3 | -49.1 | -39.6 | -3231.4 | -9177.8 | -837.1 | -2782.2 | -2371.8 | -6369.1 | -837.5 | -2783.9 | -2374.0 | -6374.2 |
| c2mpyr-ntf2-p4 | -47.6 | -38.7 | -3230.7 | -9177.1 | -837.0 | -2782.2 | -2371.9 | -6369.1 | -837.5 | -2783.8 | -2373.9 | -6374.0 |
| c2mpyr-ntf2-p5 | -40.3 | -31.8 | -3227.7 | -9171.2 | -836.8 | -2781.9 | -2371.8 | -6368.2 | -837.2 | -2783.7 | -2373.6 | -6372.7 |
| c2mpyr-ntf2-p6 | -37.7 | -29.8 | -3227.1 | -9170.2 | -837.1 | -2782.2 | -2371.9 | -6368.3 | -837.6 | -2783.9 | -2373.6 | -6372.4 |
| c2mpyr-pf6-p1  | -33.0 | -24.1 | -2039.7 | -6043.2 | -837.1 | -2782.3 | -1187.3 | -3243.2 | -837.4 | -2783.7 | -1189.6 | -3248.1 |
| c2mpyr-pf6-p2  | -30.9 | -22.8 | -2038.9 | -6042.2 | -837.2 | -2782.4 | -1187.4 | -3243.2 | -837.5 | -2783.6 | -1189.5 | -3247.8 |
| c2mpyr-pf6-p3  | -30.1 | -22.4 | -2038.3 | -6041.6 | -837.0 | -2782.3 | -1187.4 | -3243.2 | -837.3 | -2783.3 | -1189.4 | -3247.6 |
| c2mpyr-tos-p1  | -40.2 | -28.8 | -2247.7 | -6680.6 | -836.9 | -2782.4 | -1390.7 | -3878.0 | -837.3 | -2784.2 | -1393.7 | -3884.4 |
| c2mpyr-tos-p2  | -36.8 | -26.3 | -2246.6 | -6679.5 | -837.5 | -2783.0 | -1390.7 | -3878.1 | -837.9 | -2784.5 | -1393.5 | -3883.9 |
| c3mim-bf4-p1   | -36.3 | -25.8 | -1778.0 | -5205.8 | -981.6 | -3037.7 | -780.1  | -2148.2 | -982.3 | -3040.1 | -782.3  | -2153.4 |
| c3mim-bf4-p2   | -35.6 | -25.3 | -1777.6 | -5205.4 | -981.6 | -3037.5 | -780.1  | -2148.2 | -982.3 | -3040.0 | -782.2  | -2153.2 |
| c3mim-br-p1    | -47.3 | -37.9 | -1231.3 | -3584.2 | -983.1 | -3046.3 | -226.1  | -512.7  | -983.5 | -3047.3 | -228.0  | -518.8  |
| c3mim-br-p2    | -31.6 | -24.6 | -1225.8 | -3576.3 | -983.8 | -3048.0 | -226.1  | -512.7  | -983.9 | -3048.5 | -227.4  | -517.5  |
| c3mim-br-p3    | -36.3 | -28.4 | -1227.5 | -3578.5 | -983.4 | -3047.5 | -226.1  | -512.7  | -983.6 | -3048.2 | -227.7  | -518.0  |
| c3mim-br-p4    | -49.0 | -39.0 | -1232.2 | -3585.6 | -983.3 | -3046.7 | -226.1  | -512.7  | -983.7 | -3047.9 | -228.1  | -519.1  |
| c3mim-cl-p1    | -42.3 | -30.9 | -1131.3 | -3451.0 | -983.0 | -3046.1 | -129.1  | -381.9  | -983.3 | -3046.9 | -131.6  | -389.7  |
| c3mim-cl-p2    | -30.8 | -22.0 | -1128.3 | -3446.1 | -984.0 | -3048.6 | -129.1  | -381.9  | -984.2 | -3049.1 | -130.9  | -388.3  |
| c3mim-cl-p3    | -34.8 | -24.9 | -1129.7 | -3447.7 | -983.6 | -3048.0 | -129.1  | -381.9  | -983.8 | -3048.5 | -131.3  | -388.9  |
| c3mim-cl-p4    | -43.2 | -31.3 | -1131.7 | -3452.0 | -983.1 | -3046.3 | -129.1  | -381.9  | -983.4 | -3047.3 | -131.6  | -389.9  |
| c3mim-dca-p1   | -64.7 | -55.6 | -1633.9 | -4778.2 | -981.5 | -3038.0 | -622.6  | -1705.5 | -982.2 | -3040.3 | -624.3  | -1709.8 |
| c3mim-dca-p2   | -65.8 | -56.6 | -1634.8 | -4779.4 | -981.9 | -3038.6 | -622.6  | -1705.3 | -982.6 | -3041.1 | -624.3  | -1709.6 |
| c3mim-dca-p3   | -54.4 | -46.9 | -1630.2 | -4773.2 | -981.9 | -3039.3 | -622.4  | -1705.3 | -982.4 | -3041.1 | -623.9  | -1709.1 |
| c3mim-dca-p4   | -67.1 | -57.6 | -1635.5 | -4779.2 | -981.6 | -3038.1 | -622.7  | -1705.1 | -982.3 | -3040.7 | -624.4  | -1709.7 |
| c3mim-dca-p5   | -64.0 | -55.0 | -1632.9 | -4777.3 | -981.1 | -3037.4 | -622.5  | -1705.1 | -981.8 | -3039.8 | -624.2  | -1709.4 |
| c3mim-dca-p6   | -62.7 | -54.0 | -1632.5 | -4776.6 | -981.2 | -3037.4 | -622.7  | -1705.2 | -981.8 | -3039.7 | -624.4  | -1709.3 |
| c3mim-mes-p1   | -54.7 | -39.9 | -1753.9 | -5153.6 | -982.4 | -3039.0 | -745.4  | -2085.9 | -983.1 | -3041.4 | -749.1  | -2093.9 |
| c3mim-mes-p2   | -48.1 | -34.5 | -1749.4 | -5149.0 | -981.3 | -3037.5 | -745.5  | -2086.0 | -981.9 | -3039.6 | -748.9  | -2093.4 |
| c3mim-ntf2-p1  | -83.3 | -66.7 | -3392.5 | -9453.6 | -981.6 | -3037.8 | -2373.4 | -6370.0 | -982.6 | -3041.4 | -2376.9 | -6378.5 |
| c3mim-ntf2-p2  | -53.4 | -42.4 | -3380.2 | -9436.5 | -981.9 | -3039.3 | -2373.0 | -6369.1 | -982.4 | -3041.3 | -2375.4 | -6375.2 |
| c3mim-ntf2-p3  | -46.6 | -35.4 | -3377.6 | -9431.0 | -981.4 | -3038.3 | -2373.4 | -6369.0 | -982.1 | -3040.7 | -2375.8 | -6374.7 |
| c3mim-ntf2-p4  | -70.7 | -57.2 | -3386.6 | -9446.3 | -981.2 | -3037.1 | -2373.6 | -6370.3 | -982.0 | -3040.1 | -2376.4 | -6377.2 |
| c3mim-pf6-p1   | -40.9 | -29.6 | -2186.6 | -6302.8 | -981.3 | -3037.4 | -1187.2 | -3242.6 | -981.9 | -3039.5 | -1189.9 | -3248.6 |
| c3mim-pf6-p2   | -36.9 | -26.0 | -2184.4 | -6300.2 | -980.9 | -3036.7 | -1187.2 | -3242.8 | -981.4 | -3038.6 | -1189.9 | -3248.6 |
| c3mim-tos-p1   | -54.5 | -39.8 | -2399.5 | -6944.3 | -982.2 | -3038.8 | -1391.2 | -3877.0 | -983.0 | -3041.4 | -1394.8 | -3884.8 |
| c3mim-tos-p2   | -51.8 | -37.5 | -2397.6 | -6942.3 | -981.8 | -3038.0 | -1391.3 | -3877.1 | -982.5 | -3040.5 | -1394.7 | -3884.6 |



|                |       |       |         |         |         |         |         |         |         |         |         |         |
|----------------|-------|-------|---------|---------|---------|---------|---------|---------|---------|---------|---------|---------|
| c3mpyr-bf4-p1  | -33.6 | -24.8 | -1734.4 | -5287.6 | -939.1  | -3122.9 | -779.7  | -2146.6 | -939.6  | -3124.7 | -781.7  | -2151.3 |
| c3mpyr-bf4-p2  | -30.9 | -23.0 | -1733.6 | -5286.5 | -939.5  | -3123.3 | -779.7  | -2146.7 | -939.8  | -3124.8 | -781.5  | -2150.9 |
| c3mpyr-bf4-p3  | -30.5 | -22.9 | -1733.2 | -5286.1 | -939.2  | -3123.2 | -779.7  | -2146.6 | -939.6  | -3124.5 | -781.5  | -2150.8 |
| c3mpyr-br-p1   | -47.0 | -39.1 | -1188.0 | -3661.6 | -939.8  | -3124.0 | -226.1  | -512.7  | -940.0  | -3124.7 | -227.7  | -518.1  |
| c3mpyr-br-p2   | -43.9 | -36.4 | -1186.3 | -3660.1 | -939.6  | -3124.1 | -226.1  | -512.7  | -939.8  | -3124.8 | -227.6  | -517.8  |
| c3mpyr-br-p3   | -44.2 | -36.9 | -1186.6 | -3660.3 | -939.7  | -3124.2 | -226.1  | -512.7  | -939.9  | -3124.8 | -227.6  | -517.7  |
| c3mpyr-cl-p1   | -43.6 | -33.9 | -1088.9 | -3529.6 | -939.8  | -3124.1 | -129.1  | -381.9  | -940.0  | -3124.7 | -131.3  | -388.7  |
| c3mpyr-cl-p2   | -41.8 | -32.5 | -1087.9 | -3528.8 | -939.6  | -3124.3 | -129.1  | -381.9  | -939.7  | -3124.8 | -131.2  | -388.4  |
| c3mpyr-cl-p3   | -41.5 | -32.5 | -1087.9 | -3528.6 | -939.8  | -3124.3 | -129.1  | -381.9  | -939.9  | -3124.7 | -131.1  | -388.3  |
| c3mpyr-dca-p1  | -43.4 | -36.7 | -1577.3 | -4836.0 | -939.4  | -3123.3 | -616.8  | -1690.4 | -939.8  | -3124.8 | -618.2  | -1693.8 |
| c3mpyr-dca-p2  | -45.4 | -38.6 | -1577.9 | -4837.3 | -939.2  | -3123.3 | -616.8  | -1690.5 | -939.6  | -3124.7 | -618.3  | -1694.0 |
| c3mpyr-dca-p3  | -41.5 | -35.7 | -1574.8 | -4837.4 | -939.3  | -3123.3 | -616.8  | -1691.3 | -939.7  | -3124.8 | -617.9  | -1694.2 |
| c3mpyr-dca-p4  | -44.0 | -37.6 | -1577.1 | -4836.8 | -939.5  | -3123.4 | -616.7  | -1690.4 | -939.9  | -3124.9 | -618.0  | -1693.6 |
| c3mpyr-dca-p5  | -45.8 | -39.3 | -1577.9 | -4837.7 | -939.3  | -3123.3 | -616.7  | -1690.5 | -939.7  | -3124.7 | -618.1  | -1693.8 |
| c3mpyr-mes-p1  | -44.3 | -31.8 | -1706.1 | -5233.3 | -939.1  | -3123.2 | -745.5  | -2087.3 | -939.6  | -3124.9 | -748.8  | -2094.3 |
| c3mpyr-mes-p2  | -39.8 | -28.7 | -1704.7 | -5231.5 | -939.8  | -3123.8 | -745.5  | -2087.4 | -940.1  | -3125.2 | -748.5  | -2093.7 |
| c3mpyr-mes-p3  | -38.6 | -28.1 | -1703.9 | -5230.5 | -939.3  | -3123.8 | -745.5  | -2087.3 | -939.7  | -3125.1 | -748.3  | -2093.3 |
| c3mpyr-ntf2-p1 | -52.3 | -42.1 | -3335.3 | -9520.8 | -939.5  | -3123.2 | -2371.9 | -6369.2 | -940.0  | -3125.2 | -2374.1 | -6374.5 |
| c3mpyr-ntf2-p2 | -38.5 | -30.4 | -3329.6 | -9510.9 | -939.2  | -3122.9 | -2371.8 | -6368.2 | -939.6  | -3124.6 | -2373.5 | -6372.3 |
| c3mpyr-ntf2-p3 | -49.4 | -39.8 | -3333.8 | -9518.8 | -939.2  | -3122.9 | -2371.9 | -6369.1 | -939.6  | -3124.6 | -2374.1 | -6374.4 |
| c3mpyr-ntf2-p4 | -49.8 | -40.4 | -3334.0 | -9519.0 | -939.3  | -3123.1 | -2371.8 | -6369.0 | -939.7  | -3124.8 | -2373.9 | -6374.1 |
| c3mpyr-ntf2-p5 | -40.4 | -31.7 | -3329.9 | -9512.0 | -938.9  | -3122.7 | -2371.7 | -6368.1 | -939.4  | -3124.4 | -2373.6 | -6372.7 |
| c3mpyr-ntf2-p6 | -39.6 | -31.1 | -3330.1 | -9512.0 | -939.3  | -3123.1 | -2371.9 | -6368.2 | -939.8  | -3124.8 | -2373.7 | -6372.7 |
| c3mpyr-pf6-p1  | -34.4 | -25.0 | -2142.2 | -6384.5 | -939.0  | -3122.8 | -1187.3 | -3243.2 | -939.4  | -3124.3 | -1189.7 | -3248.3 |
| c3mpyr-pf6-p2  | -31.0 | -22.7 | -2141.0 | -6382.9 | -939.3  | -3123.1 | -1187.4 | -3243.2 | -939.6  | -3124.3 | -1189.5 | -3247.8 |
| c3mpyr-pf6-p3  | -30.8 | -22.8 | -2140.8 | -6382.8 | -939.2  | -3123.0 | -1187.4 | -3243.2 | -939.5  | -3124.2 | -1189.4 | -3247.8 |
| c3mpyr-tos-p1  | -41.6 | -29.6 | -2350.4 | -7022.3 | -939.1  | -3123.2 | -1390.7 | -3878.0 | -939.6  | -3125.0 | -1393.8 | -3884.6 |
| c3mpyr-tos-p2  | -37.2 | -26.5 | -2348.9 | -7020.5 | -939.7  | -3123.8 | -1390.7 | -3878.0 | -940.1  | -3125.3 | -1393.5 | -3884.0 |
| c4mim-bf4-p1   | -37.0 | -26.2 | -1880.4 | -5546.4 | -1083.8 | -3377.9 | -780.1  | -2148.1 | -1084.4 | -3380.3 | -782.3  | -2153.5 |
| c4mim-bf4-p2   | -35.9 | -25.5 | -1879.7 | -5545.6 | -1083.7 | -3377.5 | -780.1  | -2148.2 | -1084.3 | -3380.0 | -782.2  | -2153.3 |
| c4mim-br-p1    | -48.3 | -38.7 | -1333.9 | -3925.6 | -1085.3 | -3387.1 | -226.1  | -512.7  | -1085.6 | -3388.2 | -228.1  | -518.9  |
| c4mim-br-p2    | -32.6 | -25.4 | -1328.4 | -3917.7 | -1086.0 | -3388.8 | -226.1  | -512.7  | -1086.1 | -3389.4 | -227.5  | -517.7  |
| c4mim-br-p3    | -38.3 | -30.0 | -1330.6 | -3920.4 | -1085.6 | -3388.3 | -226.1  | -512.7  | -1085.8 | -3389.1 | -227.8  | -518.3  |
| c4mim-br-p4    | -49.6 | -39.4 | -1334.5 | -3926.6 | -1085.4 | -3387.3 | -226.1  | -512.7  | -1085.7 | -3388.5 | -228.1  | -519.2  |
| c4mim-cl-p1    | -43.0 | -31.4 | -1233.7 | -3792.2 | -1085.1 | -3386.9 | -129.1  | -381.9  | -1085.4 | -3387.7 | -131.6  | -389.8  |
| c4mim-cl-p2    | -31.5 | -22.4 | -1230.8 | -3787.3 | -1086.2 | -3389.4 | -129.1  | -381.9  | -1086.3 | -3389.9 | -131.0  | -388.4  |
| c4mim-cl-p3    | -36.3 | -25.9 | -1232.5 | -3789.3 | -1085.8 | -3388.8 | -129.1  | -381.9  | -1085.9 | -3389.4 | -131.4  | -389.2  |
| c4mim-cl-p4    | -43.7 | -31.7 | -1233.9 | -3792.9 | -1085.2 | -3386.9 | -129.1  | -381.9  | -1085.5 | -3387.9 | -131.7  | -390.0  |
| c4mim-dca-p1   | -65.5 | -56.2 | -1736.5 | -5118.9 | -1083.7 | -3378.2 | -622.6  | -1705.5 | -1084.4 | -3380.6 | -624.4  | -1709.9 |



|                |       |       |         |         |         |         |         |         |         |         |         |         |
|----------------|-------|-------|---------|---------|---------|---------|---------|---------|---------|---------|---------|---------|
| c4mim-dca-p2   | -68.9 | -59.0 | -1738.5 | -5120.4 | -1083.8 | -3378.4 | -622.7  | -1705.2 | -1084.6 | -3381.0 | -624.5  | -1709.8 |
| c4mim-dca-p3   | -64.3 | -55.3 | -1735.1 | -5117.6 | -1083.2 | -3377.4 | -622.5  | -1705.2 | -1083.8 | -3379.8 | -624.2  | -1709.5 |
| c4mim-mes-p1   | -56.0 | -40.9 | -1856.6 | -5494.5 | -1084.6 | -3379.2 | -745.4  | -2085.9 | -1085.2 | -3381.6 | -749.2  | -2094.1 |
| c4mim-mes-p2   | -48.2 | -34.6 | -1851.5 | -5489.0 | -1083.4 | -3377.4 | -745.5  | -2086.0 | -1083.9 | -3379.5 | -748.9  | -2093.5 |
| c4mim-pf6-p1   | -43.4 | -30.4 | -2290.3 | -6644.7 | -1083.7 | -3377.9 | -1187.2 | -3242.8 | -1084.3 | -3380.2 | -1190.4 | -3249.7 |
| c4mim-pf6-p2   | -37.0 | -26.0 | -2286.5 | -6640.2 | -1083.0 | -3376.7 | -1187.2 | -3242.8 | -1083.5 | -3378.6 | -1189.9 | -3248.6 |
| c4mim-tos-p1   | -56.8 | -41.6 | -2502.7 | -7285.8 | -1084.4 | -3379.0 | -1391.2 | -3877.1 | -1085.2 | -3381.7 | -1394.9 | -3885.1 |
| c4mim-tos-p2   | -52.6 | -38.5 | -2500.7 | -7283.2 | -1084.4 | -3378.7 | -1391.2 | -3877.1 | -1085.1 | -3381.3 | -1394.6 | -3884.5 |
| c4mpyr-bf4-p1  | -33.8 | -24.8 | -1836.5 | -5628.2 | -1041.2 | -3463.4 | -779.7  | -2146.6 | -1041.6 | -3465.1 | -781.7  | -2151.4 |
| c4mpyr-bf4-p2  | -31.1 | -23.2 | -1835.7 | -5627.1 | -1041.5 | -3463.8 | -779.7  | -2146.7 | -1041.9 | -3465.2 | -781.5  | -2151.0 |
| c4mpyr-bf4-p3  | -30.8 | -23.1 | -1835.4 | -5626.8 | -1041.3 | -3463.7 | -779.7  | -2146.7 | -1041.6 | -3465.1 | -781.5  | -2150.9 |
| c4mpyr-br-p1   | -47.3 | -39.2 | -1290.1 | -4002.2 | -1041.8 | -3464.5 | -226.1  | -512.7  | -1042.0 | -3465.2 | -227.8  | -518.1  |
| c4mpyr-br-p2   | -44.3 | -36.7 | -1288.4 | -4000.8 | -1041.6 | -3464.6 | -226.1  | -512.7  | -1041.8 | -3465.3 | -227.6  | -517.8  |
| c4mpyr-br-p3   | -44.5 | -37.1 | -1288.8 | -4000.9 | -1041.8 | -3464.7 | -226.1  | -512.7  | -1041.9 | -3465.3 | -227.6  | -517.7  |
| c4mpyr-cl-p1   | -43.6 | -33.8 | -1190.9 | -3870.0 | -1041.8 | -3464.5 | -129.1  | -381.9  | -1042.0 | -3465.1 | -131.3  | -388.7  |
| c4mpyr-cl-p2   | -42.4 | -33.0 | -1190.2 | -3869.7 | -1041.7 | -3464.9 | -129.1  | -381.9  | -1041.8 | -3465.4 | -131.2  | -388.5  |
| c4mpyr-cl-p3   | -41.5 | -32.5 | -1189.9 | -3869.1 | -1041.8 | -3464.8 | -129.1  | -381.9  | -1041.9 | -3465.2 | -131.1  | -388.3  |
| c4mpyr-dca-p1  | -43.8 | -37.3 | -1678.6 | -5177.5 | -1041.4 | -3463.5 | -616.7  | -1690.6 | -1041.8 | -3465.0 | -618.1  | -1693.9 |
| c4mpyr-dca-p2  | -45.4 | -38.7 | -1680.0 | -5177.9 | -1041.3 | -3463.9 | -616.8  | -1690.5 | -1041.7 | -3465.3 | -618.3  | -1694.0 |
| c4mpyr-dca-p3  | -44.2 | -37.4 | -1679.6 | -5176.9 | -1041.4 | -3463.7 | -616.8  | -1690.4 | -1041.8 | -3465.3 | -618.2  | -1693.9 |
| c4mpyr-dca-p4  | -45.1 | -38.4 | -1679.4 | -5178.0 | -1041.3 | -3463.8 | -616.7  | -1690.5 | -1041.7 | -3465.3 | -618.2  | -1693.9 |
| c4mpyr-dca-p5  | -45.9 | -39.4 | -1680.0 | -5178.3 | -1041.3 | -3463.8 | -616.7  | -1690.5 | -1041.7 | -3465.2 | -618.1  | -1693.9 |
| c4mpyr-mes-p1  | -44.3 | -31.8 | -1808.1 | -5573.8 | -1041.2 | -3463.7 | -745.5  | -2087.3 | -1041.6 | -3465.4 | -748.8  | -2094.3 |
| c4mpyr-mes-p2  | -40.3 | -29.1 | -1806.9 | -5572.4 | -1041.8 | -3464.3 | -745.5  | -2087.4 | -1042.2 | -3465.8 | -748.5  | -2093.7 |
| c4mpyr-mes-p3  | -38.9 | -28.3 | -1806.1 | -5571.2 | -1041.4 | -3464.3 | -745.5  | -2087.3 | -1041.8 | -3465.6 | -748.3  | -2093.3 |
| c4mpyr-ntf2-p1 | -52.6 | -42.2 | -3437.3 | -9861.3 | -1041.5 | -3463.6 | -2371.9 | -6369.1 | -1042.0 | -3465.7 | -2374.1 | -6374.5 |
| c4mpyr-ntf2-p2 | -44.2 | -34.3 | -3433.7 | -9854.4 | -1041.2 | -3463.2 | -2371.7 | -6367.9 | -1041.7 | -3465.4 | -2373.8 | -6372.8 |
| c4mpyr-ntf2-p3 | -50.6 | -40.8 | -3436.4 | -9859.9 | -1041.2 | -3463.5 | -2371.9 | -6369.1 | -1041.7 | -3465.3 | -2374.1 | -6374.4 |
| c4mpyr-ntf2-p4 | -51.1 | -41.3 | -3436.5 | -9860.2 | -1041.3 | -3463.5 | -2371.9 | -6369.1 | -1041.8 | -3465.4 | -2374.0 | -6374.3 |
| c4mpyr-ntf2-p5 | -41.1 | -32.3 | -3432.1 | -9852.9 | -1040.9 | -3463.2 | -2371.7 | -6368.1 | -1041.4 | -3464.9 | -2373.6 | -6372.7 |
| c4mpyr-ntf2-p6 | -41.4 | -32.4 | -3432.8 | -9853.4 | -1041.4 | -3463.5 | -2371.8 | -6368.1 | -1041.9 | -3465.4 | -2373.8 | -6372.8 |
| c4mpyr-pf6-p1  | -34.5 | -25.0 | -2244.3 | -6725.2 | -1041.1 | -3463.3 | -1187.3 | -3243.2 | -1041.5 | -3464.8 | -1189.7 | -3248.4 |
| c4mpyr-pf6-p2  | -31.4 | -23.0 | -2243.2 | -6723.7 | -1041.4 | -3463.6 | -1187.4 | -3243.2 | -1041.7 | -3464.8 | -1189.5 | -3247.9 |
| c4mpyr-pf6-p3  | -31.1 | -22.9 | -2242.9 | -6723.5 | -1041.2 | -3463.5 | -1187.4 | -3243.2 | -1041.5 | -3464.7 | -1189.5 | -3247.8 |
| c4mpyr-tos-p1  | -41.9 | -29.8 | -2452.6 | -7363.0 | -1041.2 | -3463.7 | -1390.7 | -3878.0 | -1041.7 | -3465.6 | -1393.9 | -3884.7 |
| c4mpyr-tos-p2  | -38.0 | -27.1 | -2451.3 | -7361.5 | -1041.8 | -3464.3 | -1390.8 | -3878.1 | -1042.2 | -3465.8 | -1393.6 | -3884.1 |



## 2.2.4 KTZVPP basis set

Table S 5: Raw KTZVPP energies. Superscript \* indicates monomer calculated in the dimer basis set.

| ion pair       | E(int) | E(int) CP | E(dimer) SS | E(dimer) OS | E(A) SS | E(A) OS | E(B) SS | E(B) OS | E(A) SS* | E(A) OS* | E(B) SS* | E(B) OS* |
|----------------|--------|-----------|-------------|-------------|---------|---------|---------|---------|----------|----------|----------|----------|
| c1mim-bf4-p1   | -34.6  | -25.3     | -1575.6     | -4580.3     | -780.3  | -2412.8 | -780.1  | -2148.2 | -780.7   | -2414.5  | -782.2   | -2153.3  |
| c1mim-br-p1    | -47.9  | -38.6     | -1030.4     | -2959.1     | -782.3  | -2420.6 | -226.1  | -512.7  | -782.5   | -2421.4  | -228.0   | -519.0   |
| c1mim-br-p2    | -32.0  | -24.2     | -1023.4     | -2949.8     | -782.0  | -2420.6 | -226.1  | -512.7  | -782.0   | -2420.9  | -227.6   | -518.5   |
| c1mim-cl-p1    | -42.9  | -31.8     | -931.8      | -2833.0     | -782.1  | -2420.3 | -130.5  | -389.0  | -782.3   | -2421.0  | -133.0   | -396.7   |
| c1mim-cl-p2    | -32.6  | -23.2     | -928.1      | -2827.2     | -782.2  | -2421.1 | -130.5  | -389.0  | -782.3   | -2421.4  | -132.4   | -396.1   |
| c1mim-dca-p1   | -63.4  | -55.2     | -1432.8     | -4153.2     | -780.8  | -2414.1 | -622.7  | -1705.0 | -781.2   | -2415.7  | -624.4   | -1709.4  |
| c1mim-dca-p2   | -47.0  | -40.5     | -1425.5     | -4144.9     | -780.9  | -2415.2 | -622.4  | -1705.0 | -781.1   | -2416.0  | -623.7   | -1709.1  |
| c1mim-mes-p1   | -48.1  | -35.2     | -1552.4     | -4550.6     | -780.8  | -2413.7 | -748.9  | -2111.6 | -781.2   | -2415.3  | -752.3   | -2119.0  |
| c1mim-ntf2-p1  | -74.4  | -60.9     | -3190.0     | -8834.3     | -780.3  | -2412.9 | -2376.3 | -6380.4 | -780.9   | -2415.3  | -2379.3  | -6387.9  |
| c1mim-ntf2-p2  | -41.7  | -32.7     | -3176.0     | -8815.1     | -780.6  | -2414.7 | -2375.5 | -6378.7 | -780.8   | -2415.6  | -2377.6  | -6384.4  |
| c1mim-ntf2-p3  | -44.1  | -33.9     | -3178.0     | -8816.0     | -780.4  | -2413.7 | -2376.3 | -6379.5 | -780.8   | -2415.4  | -2378.6  | -6385.3  |
| c1mim-pf6-p1   | -37.8  | -27.1     | -1985.4     | -5680.8     | -780.3  | -2412.9 | -1188.4 | -3246.8 | -780.7   | -2414.4  | -1191.1  | -3252.8  |
| c1mim-tos-p1   | -45.7  | -33.2     | -2198.9     | -6365.4     | -780.5  | -2413.4 | -1396.8 | -3928.0 | -780.9   | -2415.1  | -1400.0  | -3935.1  |
| c1mpyr-bf4-p1  | -35.0  | -26.2     | -1535.1     | -4693.8     | -739.4  | -2528.3 | -779.7  | -2146.6 | -739.6   | -2529.3  | -781.9   | -2152.0  |
| c1mpyr-bf4-p2  | -31.9  | -24.2     | -1533.9     | -4692.4     | -739.5  | -2528.5 | -779.7  | -2146.6 | -739.7   | -2529.2  | -781.7   | -2151.5  |
| c1mpyr-br-p1   | -49.0  | -40.6     | -988.6      | -3068.5     | -740.0  | -2529.3 | -226.1  | -512.7  | -740.1   | -2529.8  | -227.9   | -518.8   |
| c1mpyr-br-p2   | -46.4  | -38.6     | -987.4      | -3067.3     | -740.0  | -2529.5 | -226.1  | -512.7  | -740.1   | -2529.9  | -227.7   | -518.4   |
| c1mpyr-cl-p1   | -46.4  | -36.3     | -891.4      | -2944.0     | -740.1  | -2529.4 | -130.5  | -389.0  | -740.2   | -2529.8  | -132.8   | -396.4   |
| c1mpyr-cl-p2   | -44.9  | -35.3     | -890.7      | -2943.3     | -740.1  | -2529.6 | -130.5  | -389.0  | -740.1   | -2529.8  | -132.7   | -396.1   |
| c1mpyr-dca-p1  | -44.2  | -37.9     | -1378.0     | -4242.0     | -739.9  | -2529.1 | -616.7  | -1690.2 | -740.1   | -2529.8  | -618.2   | -1694.0  |
| c1mpyr-dca-p2  | -47.7  | -41.5     | -1379.0     | -4244.3     | -739.7  | -2528.8 | -616.7  | -1690.5 | -739.9   | -2529.5  | -618.2   | -1694.3  |
| c1mpyr-dca-p3  | -44.9  | -38.9     | -1376.2     | -4244.4     | -739.4  | -2528.5 | -616.6  | -1691.0 | -739.6   | -2529.4  | -617.9   | -1694.6  |
| c1mpyr-dca-p4  | -46.3  | -39.9     | -1378.1     | -4243.4     | -739.4  | -2528.5 | -616.7  | -1690.5 | -739.6   | -2529.3  | -618.2   | -1694.3  |
| c1mpyr-mes-p1  | -44.6  | -32.7     | -1509.8     | -4664.2     | -739.4  | -2528.6 | -748.8  | -2112.7 | -739.6   | -2529.6  | -752.1   | -2120.1  |
| c1mpyr-mes-p2  | -39.4  | -29.0     | -1507.6     | -4661.7     | -739.6  | -2529.0 | -748.8  | -2112.7 | -739.7   | -2529.7  | -751.6   | -2119.3  |
| c1mpyr-ntf2-p1 | -51.4  | -41.8     | -3137.6     | -8936.0     | -739.7  | -2528.4 | -2374.7 | -6379.5 | -739.9   | -2529.5  | -2377.0  | -6385.3  |
| c1mpyr-ntf2-p2 | -38.9  | -30.8     | -3132.5     | -8927.3     | -739.4  | -2528.1 | -2374.7 | -6378.6 | -739.6   | -2529.2  | -2376.7  | -6383.5  |
| c1mpyr-ntf2-p3 | -49.8  | -40.7     | -3136.9     | -8934.8     | -739.7  | -2528.5 | -2374.6 | -6379.2 | -739.9   | -2529.4  | -2376.8  | -6384.9  |
| c1mpyr-ntf2-p5 | -40.0  | -31.9     | -3133.2     | -8927.8     | -739.6  | -2528.4 | -2374.6 | -6378.3 | -739.8   | -2529.3  | -2376.6  | -6383.3  |
| c1mpyr-pf6-p1  | -35.3  | -26.0     | -1943.9     | -5794.6     | -739.4  | -2528.2 | -1188.5 | -3247.1 | -739.6   | -2529.1  | -1191.0  | -3252.9  |
| c1mpyr-pf6-p2  | -32.3  | -24.0     | -1942.7     | -5793.1     | -739.5  | -2528.4 | -1188.5 | -3247.2 | -739.6   | -2528.9  | -1190.8  | -3252.5  |
| c1mpyr-tos-p1  | -41.5  | -30.1     | -2156.1     | -6478.3     | -739.4  | -2528.6 | -1396.2 | -3928.7 | -739.6   | -2529.6  | -1399.3  | -3935.7  |
| c1mpyr-tos-p2  | -36.3  | -26.1     | -2153.5     | -6475.9     | -739.5  | -2528.7 | -1396.2 | -3928.7 | -739.7   | -2529.5  | -1399.0  | -3935.1  |



|               |       |       |         |         |        |         |         |         |        |         |         |         |
|---------------|-------|-------|---------|---------|--------|---------|---------|---------|--------|---------|---------|---------|
| c2mim-bf4-p1  | -36.9 | -26.8 | -1681.7 | -4936.0 | -885.2 | -2767.4 | -780.1  | -2148.1 | -885.6 | -2769.2 | -782.4  | -2153.7 |
| c2mim-bf4-p2  | -34.3 | -25.0 | -1680.0 | -4934.1 | -884.7 | -2766.8 | -780.1  | -2148.2 | -885.2 | -2768.5 | -782.2  | -2153.3 |
| c2mim-br-p1   | -49.4 | -39.7 | -1135.3 | -3314.1 | -886.6 | -2774.6 | -226.1  | -512.7  | -886.8 | -2775.4 | -228.1  | -519.3  |
| c2mim-br-p2   | -36.0 | -27.5 | -1130.9 | -3307.9 | -887.6 | -2776.5 | -226.1  | -512.7  | -887.6 | -2776.9 | -227.8  | -519.0  |
| c2mim-br-p3   | -36.4 | -27.8 | -1130.2 | -3307.3 | -886.8 | -2775.6 | -226.1  | -512.7  | -886.9 | -2776.0 | -227.8  | -518.9  |
| c2mim-br-p4   | -49.4 | -39.9 | -1136.1 | -3315.1 | -887.3 | -2775.7 | -226.1  | -512.7  | -887.5 | -2776.5 | -228.1  | -519.1  |
| c2mim-cl-p1   | -44.7 | -33.1 | -1037.0 | -3188.3 | -886.5 | -2774.5 | -130.5  | -389.0  | -886.7 | -2775.2 | -133.1  | -397.2  |
| c2mim-cl-p2   | -35.3 | -25.2 | -1035.0 | -3184.7 | -887.8 | -2777.1 | -130.5  | -389.0  | -887.9 | -2777.4 | -132.6  | -396.6  |
| c2mim-cl-p3   | -36.0 | -25.6 | -1034.4 | -3184.2 | -887.0 | -2776.1 | -130.5  | -389.0  | -887.1 | -2776.5 | -132.7  | -396.7  |
| c2mim-cl-p4   | -44.1 | -32.8 | -1037.2 | -3188.7 | -887.0 | -2775.3 | -130.5  | -389.0  | -887.2 | -2776.0 | -133.0  | -396.9  |
| c2mim-dca-p1  | -65.5 | -56.7 | -1537.8 | -4508.6 | -885.1 | -2767.8 | -622.6  | -1705.4 | -885.5 | -2769.5 | -624.4  | -1710.2 |
| c2mim-dca-p2  | -61.3 | -53.1 | -1536.3 | -4505.9 | -885.3 | -2767.8 | -622.6  | -1705.2 | -885.7 | -2769.4 | -624.4  | -1709.7 |
| c2mim-dca-p3  | -65.7 | -57.0 | -1538.9 | -4509.0 | -885.7 | -2768.4 | -622.8  | -1705.2 | -886.2 | -2770.1 | -624.6  | -1710.0 |
| c2mim-dca-p4  | -62.3 | -54.0 | -1536.6 | -4506.5 | -885.2 | -2767.8 | -622.6  | -1705.2 | -885.6 | -2769.5 | -624.3  | -1709.6 |
| c2mim-dca-p5  | -63.8 | -55.3 | -1537.3 | -4507.3 | -885.2 | -2768.0 | -622.7  | -1705.0 | -885.6 | -2769.7 | -624.4  | -1709.6 |
| c2mim-dca-p6  | -64.0 | -55.6 | -1537.0 | -4507.4 | -885.0 | -2767.5 | -622.7  | -1705.1 | -885.5 | -2769.3 | -624.4  | -1709.7 |
| c2mim-mes-p1  | -54.1 | -40.1 | -1660.3 | -4908.6 | -885.9 | -2768.6 | -748.8  | -2111.4 | -886.4 | -2770.3 | -752.5  | -2119.5 |
| c2mim-mes-p2  | -48.9 | -35.7 | -1656.9 | -4905.0 | -885.1 | -2767.5 | -748.9  | -2111.6 | -885.5 | -2769.1 | -752.3  | -2119.3 |
| c2mim-ntf2-p1 | -81.5 | -66.2 | -3298.1 | -9192.9 | -885.3 | -2767.6 | -2376.3 | -6380.4 | -885.9 | -2770.1 | -2379.8 | -6389.0 |
| c2mim-ntf2-p2 | -52.6 | -41.6 | -3285.9 | -9176.8 | -885.5 | -2769.2 | -2375.9 | -6379.6 | -885.8 | -2770.4 | -2378.5 | -6386.5 |
| c2mim-ntf2-p3 | -47.5 | -36.6 | -3284.3 | -9171.9 | -885.0 | -2768.0 | -2376.3 | -6379.5 | -885.4 | -2769.7 | -2378.8 | -6385.8 |
| c2mim-ntf2-p4 | -71.3 | -57.7 | -3293.9 | -9187.3 | -885.1 | -2767.5 | -2376.5 | -6380.7 | -885.7 | -2769.9 | -2379.6 | -6388.3 |
| c2mim-pf6-p1  | -42.1 | -30.0 | -2092.1 | -6037.5 | -885.1 | -2767.4 | -1188.4 | -3246.7 | -885.5 | -2769.0 | -1191.5 | -3253.6 |
| c2mim-pf6-p2  | -38.2 | -27.3 | -2089.8 | -6034.9 | -884.7 | -2766.7 | -1188.4 | -3246.8 | -885.1 | -2768.3 | -1191.1 | -3252.9 |
| c2mim-tos-p1  | -53.1 | -39.2 | -2307.7 | -6724.1 | -885.8 | -2768.4 | -1396.7 | -3927.8 | -886.3 | -2770.2 | -1400.3 | -3935.8 |
| c2mim-tos-p2  | -46.8 | -33.9 | -2304.2 | -6720.1 | -885.1 | -2767.5 | -1396.8 | -3928.0 | -885.6 | -2769.3 | -1400.1 | -3935.4 |
| c2mpyr-bf4-p1 | -35.8 | -26.6 | -1641.9 | -5051.6 | -845.9 | -2885.5 | -779.7  | -2146.6 | -846.2 | -2886.7 | -781.9  | -2152.2 |
| c2mpyr-bf4-p2 | -33.4 | -25.0 | -1641.4 | -5050.8 | -846.4 | -2886.0 | -779.7  | -2146.7 | -846.6 | -2886.9 | -781.8  | -2151.9 |
| c2mpyr-bf4-p3 | -33.0 | -24.8 | -1640.8 | -5050.3 | -846.0 | -2885.8 | -779.7  | -2146.6 | -846.2 | -2886.6 | -781.8  | -2151.8 |
| c2mpyr-br-p1  | -50.1 | -41.3 | -1095.6 | -3426.3 | -846.6 | -2886.5 | -226.1  | -512.7  | -846.7 | -2887.0 | -227.9  | -519.0  |
| c2mpyr-br-p2  | -48.3 | -39.8 | -1094.7 | -3425.9 | -846.5 | -2887.1 | -226.1  | -512.7  | -846.6 | -2887.5 | -227.9  | -518.9  |
| c2mpyr-br-p3  | -47.5 | -39.3 | -1094.2 | -3425.0 | -846.5 | -2886.6 | -226.1  | -512.7  | -846.5 | -2887.0 | -227.8  | -518.6  |
| c2mpyr-cl-p1  | -47.1 | -36.6 | -998.2  | -3301.6 | -846.6 | -2886.6 | -130.5  | -389.0  | -846.7 | -2886.9 | -132.9  | -396.6  |
| c2mpyr-cl-p2  | -45.7 | -35.6 | -997.3  | -3301.0 | -846.4 | -2886.8 | -130.5  | -389.0  | -846.4 | -2887.1 | -132.8  | -396.5  |
| c2mpyr-cl-p3  | -45.3 | -35.4 | -997.3  | -3300.8 | -846.6 | -2886.7 | -130.5  | -389.0  | -846.6 | -2887.0 | -132.7  | -396.3  |
| c2mpyr-dca-p1 | -44.4 | -38.0 | -1484.6 | -4599.3 | -846.4 | -2886.2 | -616.8  | -1690.2 | -846.6 | -2887.0 | -618.3  | -1694.1 |
| c2mpyr-dca-p2 | -47.8 | -41.1 | -1485.7 | -4601.4 | -846.0 | -2885.9 | -616.8  | -1690.6 | -846.2 | -2886.7 | -618.4  | -1694.6 |
| c2mpyr-dca-p3 | -48.1 | -41.8 | -1485.6 | -4601.7 | -846.1 | -2885.9 | -616.7  | -1690.5 | -846.3 | -2886.7 | -618.2  | -1694.3 |
| c2mpyr-mes-p1 | -46.3 | -33.7 | -1617.0 | -5022.5 | -845.9 | -2885.8 | -748.8  | -2112.7 | -846.2 | -2886.9 | -752.3  | -2120.4 |



|                |       |       |         |         |        |         |         |         |        |         |         |         |
|----------------|-------|-------|---------|---------|--------|---------|---------|---------|--------|---------|---------|---------|
| c2mpyr-mes-p2  | -42.5 | -30.9 | -1615.8 | -5021.2 | -846.6 | -2886.4 | -748.9  | -2112.8 | -846.8 | -2887.3 | -752.1  | -2120.1 |
| c2mpyr-mes-p3  | -41.2 | -30.2 | -1614.9 | -5020.2 | -846.1 | -2886.2 | -748.8  | -2112.7 | -846.3 | -2887.0 | -751.9  | -2119.7 |
| c2mpyr-ntf2-p1 | -52.5 | -42.6 | -3244.9 | -9293.9 | -846.2 | -2885.5 | -2374.8 | -6379.6 | -846.5 | -2886.8 | -2377.2 | -6385.5 |
| c2mpyr-ntf2-p2 | -41.3 | -32.7 | -3240.1 | -9285.9 | -845.9 | -2885.3 | -2374.7 | -6378.7 | -846.1 | -2886.4 | -2376.8 | -6384.0 |
| c2mpyr-ntf2-p3 | -51.5 | -41.7 | -3244.2 | -9293.1 | -846.1 | -2885.6 | -2374.7 | -6379.5 | -846.3 | -2886.6 | -2377.2 | -6385.5 |
| c2mpyr-ntf2-p4 | -50.4 | -41.1 | -3243.6 | -9292.6 | -846.0 | -2885.5 | -2374.7 | -6379.5 | -846.3 | -2886.6 | -2377.0 | -6385.3 |
| c2mpyr-ntf2-p5 | -42.7 | -33.9 | -3240.5 | -9286.5 | -845.7 | -2885.3 | -2374.6 | -6378.6 | -846.0 | -2886.4 | -2376.8 | -6383.9 |
| c2mpyr-ntf2-p6 | -40.1 | -32.0 | -3239.8 | -9285.4 | -846.1 | -2885.6 | -2374.8 | -6378.7 | -846.3 | -2886.5 | -2376.7 | -6383.7 |
| c2mpyr-pf6-p1  | -35.8 | -26.2 | -2050.8 | -6152.3 | -846.1 | -2885.7 | -1188.5 | -3247.1 | -846.3 | -2886.7 | -1191.0 | -3253.0 |
| c2mpyr-pf6-p2  | -33.7 | -24.8 | -2050.0 | -6151.3 | -846.1 | -2885.7 | -1188.5 | -3247.2 | -846.3 | -2886.5 | -1190.9 | -3252.8 |
| c2mpyr-pf6-p3  | -33.1 | -24.4 | -2049.5 | -6150.8 | -846.0 | -2885.6 | -1188.5 | -3247.2 | -846.1 | -2886.3 | -1190.9 | -3252.6 |
| c2mpyr-tos-p1  | -43.4 | -31.3 | -2263.3 | -6836.7 | -845.9 | -2885.8 | -1396.2 | -3928.7 | -846.2 | -2886.9 | -1399.5 | -3936.1 |
| c2mpyr-tos-p2  | -39.8 | -28.6 | -2262.2 | -6835.4 | -846.5 | -2886.3 | -1396.2 | -3928.8 | -846.7 | -2887.3 | -1399.3 | -3935.7 |
| c3mim-bf4-p1   | -37.9 | -27.4 | -1785.7 | -5290.3 | -988.7 | -3121.1 | -780.1  | -2148.2 | -989.2 | -3122.9 | -782.5  | -2154.0 |
| c3mim-bf4-p2   | -37.0 | -26.8 | -1785.2 | -5289.7 | -988.7 | -3121.0 | -780.1  | -2148.2 | -989.2 | -3122.8 | -782.4  | -2153.7 |
| c3mim-br-p1    | -50.2 | -40.2 | -1239.2 | -3668.7 | -990.2 | -3128.8 | -226.1  | -512.7  | -990.4 | -3129.6 | -228.2  | -519.5  |
| c3mim-br-p2    | -36.5 | -27.8 | -1234.4 | -3662.1 | -990.9 | -3130.4 | -226.1  | -512.7  | -991.0 | -3130.8 | -227.9  | -519.1  |
| c3mim-br-p3    | -40.9 | -31.5 | -1236.0 | -3663.9 | -990.5 | -3129.8 | -226.1  | -512.7  | -990.6 | -3130.4 | -228.1  | -519.5  |
| c3mim-br-p4    | -51.4 | -41.0 | -1240.1 | -3669.9 | -990.5 | -3129.4 | -226.1  | -512.7  | -990.7 | -3130.3 | -228.3  | -519.7  |
| c3mim-cl-p1    | -45.3 | -33.4 | -1140.7 | -3542.6 | -990.1 | -3128.6 | -130.5  | -389.0  | -990.2 | -3129.2 | -133.2  | -397.3  |
| c3mim-cl-p2    | -35.5 | -25.3 | -1138.3 | -3538.7 | -991.1 | -3131.0 | -130.5  | -389.0  | -991.2 | -3131.3 | -132.6  | -396.7  |
| c3mim-cl-p3    | -39.3 | -28.1 | -1139.6 | -3540.2 | -990.7 | -3130.3 | -130.5  | -389.0  | -990.8 | -3130.7 | -132.9  | -397.2  |
| c3mim-cl-p4    | -45.5 | -33.4 | -1140.9 | -3543.4 | -990.3 | -3129.1 | -130.5  | -389.0  | -990.4 | -3129.8 | -133.2  | -397.4  |
| c3mim-dca-p1   | -66.6 | -57.6 | -1641.7 | -4862.7 | -988.6 | -3121.2 | -622.6  | -1705.5 | -989.0 | -3123.0 | -624.5  | -1710.4 |
| c3mim-dca-p2   | -67.5 | -58.5 | -1642.5 | -4863.7 | -989.0 | -3121.8 | -622.6  | -1705.3 | -989.5 | -3123.7 | -624.5  | -1710.1 |
| c3mim-dca-p3   | -57.7 | -49.7 | -1638.4 | -4858.7 | -989.1 | -3122.7 | -622.4  | -1705.3 | -989.4 | -3123.9 | -624.1  | -1710.0 |
| c3mim-dca-p4   | -69.0 | -59.7 | -1643.3 | -4863.7 | -988.7 | -3121.5 | -622.7  | -1705.1 | -989.2 | -3123.3 | -624.6  | -1710.2 |
| c3mim-dca-p5   | -65.3 | -56.6 | -1640.5 | -4861.3 | -988.2 | -3120.7 | -622.5  | -1705.1 | -988.6 | -3122.5 | -624.3  | -1709.8 |
| c3mim-dca-p6   | -64.2 | -55.7 | -1640.2 | -4860.9 | -988.2 | -3120.7 | -622.7  | -1705.2 | -988.7 | -3122.4 | -624.5  | -1709.8 |
| c3mim-mes-p1   | -57.0 | -42.2 | -1765.4 | -5264.0 | -989.5 | -3122.5 | -748.8  | -2111.5 | -990.0 | -3124.3 | -752.7  | -2120.1 |
| c3mim-mes-p2   | -49.5 | -36.1 | -1760.5 | -5258.7 | -988.4 | -3120.8 | -748.9  | -2111.6 | -988.9 | -3122.4 | -752.4  | -2119.4 |
| c3mim-ntf2-p1  | -85.6 | -69.1 | -3403.5 | -9548.8 | -988.8 | -3121.2 | -2376.3 | -6380.5 | -989.4 | -3123.9 | -2380.1 | -6389.8 |
| c3mim-ntf2-p2  | -57.1 | -45.1 | -3391.5 | -9532.6 | -989.0 | -3122.6 | -2375.9 | -6379.6 | -989.3 | -3124.0 | -2378.7 | -6387.0 |
| c3mim-ntf2-p3  | -49.5 | -38.0 | -3388.7 | -9526.6 | -988.5 | -3121.6 | -2376.3 | -6379.5 | -989.0 | -3123.4 | -2378.9 | -6386.1 |
| c3mim-ntf2-p4  | -72.6 | -59.1 | -3397.4 | -9541.2 | -988.3 | -3120.4 | -2376.5 | -6380.7 | -988.9 | -3122.7 | -2379.5 | -6388.3 |
| c3mim-pf6-p1   | -42.5 | -31.1 | -2195.4 | -6391.0 | -988.4 | -3120.7 | -1188.3 | -3246.6 | -988.9 | -3122.3 | -1191.2 | -3253.0 |
| c3mim-pf6-p2   | -38.3 | -27.4 | -2193.2 | -6388.3 | -988.0 | -3120.0 | -1188.4 | -3246.8 | -988.4 | -3121.6 | -1191.2 | -3253.0 |
| c3mim-tos-p1   | -56.5 | -41.8 | -2412.9 | -7079.8 | -989.4 | -3122.2 | -1396.7 | -3927.9 | -989.9 | -3124.2 | -1400.5 | -3936.3 |
| c3mim-tos-p2   | -53.5 | -39.4 | -2411.1 | -7077.8 | -989.0 | -3121.5 | -1396.8 | -3928.0 | -989.5 | -3123.5 | -1400.4 | -3936.1 |



|                |       |       |         |         |         |         |         |         |         |         |         |         |
|----------------|-------|-------|---------|---------|---------|---------|---------|---------|---------|---------|---------|---------|
| c3mpyr-bf4-p1  | -36.3 | -26.8 | -1745.5 | -5406.0 | -949.3  | -3239.6 | -779.7  | -2146.6 | -949.6  | -3240.8 | -782.0  | -2152.3 |
| c3mpyr-bf4-p2  | -33.6 | -25.0 | -1744.7 | -5404.8 | -949.7  | -3239.9 | -779.7  | -2146.7 | -949.9  | -3240.9 | -781.8  | -2152.0 |
| c3mpyr-bf4-p3  | -33.5 | -25.1 | -1744.4 | -5404.6 | -949.4  | -3239.8 | -779.7  | -2146.6 | -949.6  | -3240.7 | -781.8  | -2151.9 |
| c3mpyr-br-p1   | -51.1 | -42.1 | -1199.4 | -3781.0 | -950.0  | -3240.6 | -226.1  | -512.7  | -950.1  | -3241.1 | -228.0  | -519.1  |
| c3mpyr-br-p2   | -48.2 | -39.5 | -1197.9 | -3779.6 | -949.8  | -3240.6 | -226.1  | -512.7  | -949.9  | -3241.1 | -227.9  | -519.0  |
| c3mpyr-br-p3   | -48.3 | -40.0 | -1198.1 | -3779.7 | -949.9  | -3240.7 | -226.1  | -512.7  | -950.0  | -3241.1 | -227.8  | -518.8  |
| c3mpyr-cl-p1   | -47.6 | -36.9 | -1101.8 | -3656.0 | -950.0  | -3240.7 | -130.5  | -389.0  | -950.1  | -3241.1 | -132.9  | -396.7  |
| c3mpyr-cl-p2   | -46.1 | -35.7 | -1100.9 | -3655.3 | -949.8  | -3240.8 | -130.5  | -389.0  | -949.8  | -3241.1 | -132.8  | -396.6  |
| c3mpyr-cl-p3   | -45.7 | -35.7 | -1100.9 | -3655.1 | -949.9  | -3240.8 | -130.5  | -389.0  | -950.0  | -3241.1 | -132.8  | -396.4  |
| c3mpyr-dca-p1  | -45.6 | -39.0 | -1588.3 | -4954.1 | -949.6  | -3240.0 | -616.8  | -1690.4 | -949.8  | -3241.0 | -618.3  | -1694.4 |
| c3mpyr-dca-p2  | -47.8 | -41.0 | -1589.0 | -4955.5 | -949.4  | -3239.9 | -616.8  | -1690.5 | -949.6  | -3240.8 | -618.4  | -1694.7 |
| c3mpyr-dca-p3  | -43.5 | -37.7 | -1585.7 | -4955.3 | -949.5  | -3240.0 | -616.8  | -1691.3 | -949.7  | -3240.8 | -618.0  | -1694.8 |
| c3mpyr-dca-p4  | -46.3 | -39.9 | -1588.2 | -4955.0 | -949.7  | -3240.1 | -616.7  | -1690.4 | -949.9  | -3241.0 | -618.2  | -1694.2 |
| c3mpyr-dca-p5  | -48.2 | -41.7 | -1589.0 | -4955.8 | -949.5  | -3240.0 | -616.7  | -1690.5 | -949.7  | -3240.8 | -618.2  | -1694.4 |
| c3mpyr-mes-p1  | -47.3 | -34.3 | -1720.8 | -5377.3 | -949.3  | -3239.9 | -748.8  | -2112.7 | -949.6  | -3241.0 | -752.4  | -2120.7 |
| c3mpyr-mes-p2  | -42.8 | -31.0 | -1719.3 | -5375.4 | -949.9  | -3240.4 | -748.9  | -2112.8 | -950.2  | -3241.3 | -752.1  | -2120.2 |
| c3mpyr-mes-p3  | -42.2 | -30.8 | -1718.7 | -5374.9 | -949.5  | -3240.3 | -748.8  | -2112.7 | -949.7  | -3241.2 | -752.0  | -2119.9 |
| c3mpyr-ntf2-p1 | -54.5 | -44.2 | -3349.2 | -9649.3 | -949.7  | -3239.9 | -2374.8 | -6379.6 | -950.0  | -3241.2 | -2377.3 | -6385.7 |
| c3mpyr-ntf2-p2 | -40.8 | -32.6 | -3343.6 | -9639.5 | -949.4  | -3239.5 | -2374.7 | -6378.6 | -949.6  | -3240.6 | -2376.7 | -6383.5 |
| c3mpyr-ntf2-p3 | -51.8 | -41.9 | -3347.7 | -9647.3 | -949.4  | -3239.6 | -2374.8 | -6379.5 | -949.6  | -3240.7 | -2377.3 | -6385.6 |
| c3mpyr-ntf2-p4 | -52.6 | -42.8 | -3348.0 | -9647.8 | -949.4  | -3239.7 | -2374.7 | -6379.4 | -949.7  | -3240.9 | -2377.1 | -6385.4 |
| c3mpyr-ntf2-p5 | -42.7 | -33.9 | -3343.8 | -9640.5 | -949.1  | -3239.3 | -2374.6 | -6378.5 | -949.4  | -3240.5 | -2376.7 | -6383.9 |
| c3mpyr-ntf2-p6 | -42.0 | -33.3 | -3344.0 | -9640.6 | -949.5  | -3239.7 | -2374.7 | -6378.6 | -949.7  | -3240.8 | -2376.8 | -6383.9 |
| c3mpyr-pf6-p1  | -37.1 | -27.0 | -2154.5 | -6506.9 | -949.2  | -3239.5 | -1188.5 | -3247.1 | -949.5  | -3240.5 | -1191.1 | -3253.3 |
| c3mpyr-pf6-p2  | -33.7 | -24.7 | -2153.3 | -6505.3 | -949.5  | -3239.7 | -1188.5 | -3247.2 | -949.7  | -3240.5 | -1190.9 | -3252.8 |
| c3mpyr-pf6-p3  | -33.8 | -24.8 | -2153.1 | -6505.3 | -949.3  | -3239.7 | -1188.5 | -3247.2 | -949.5  | -3240.4 | -1190.9 | -3252.8 |
| c3mpyr-tos-p1  | -44.6 | -32.1 | -2367.2 | -7191.5 | -949.3  | -3239.9 | -1396.2 | -3928.7 | -949.6  | -3241.1 | -1399.6 | -3936.3 |
| c3mpyr-tos-p2  | -40.2 | -28.8 | -2365.7 | -7189.7 | -949.9  | -3240.3 | -1396.2 | -3928.7 | -950.1  | -3241.3 | -1399.3 | -3935.8 |
| c4mim-bf4-p1   | -38.6 | -27.8 | -1889.4 | -5644.2 | -1092.1 | -3474.6 | -780.1  | -2148.1 | -1092.6 | -3476.5 | -782.5  | -2154.1 |
| c4mim-bf4-p2   | -37.2 | -26.9 | -1888.6 | -5643.3 | -1092.0 | -3474.4 | -780.1  | -2148.2 | -1092.5 | -3476.2 | -782.4  | -2153.8 |
| c4mim-br-p1    | -51.2 | -41.0 | -1343.0 | -4023.3 | -1093.5 | -3482.9 | -226.1  | -512.7  | -1093.7 | -3483.7 | -228.3  | -519.6  |
| c4mim-br-p2    | -37.6 | -28.6 | -1338.2 | -4016.8 | -1094.2 | -3484.5 | -226.1  | -512.7  | -1094.3 | -3484.9 | -228.0  | -519.3  |
| c4mim-br-p3    | -42.9 | -33.0 | -1340.3 | -4019.1 | -1093.8 | -3483.9 | -226.1  | -512.7  | -1094.0 | -3484.5 | -228.2  | -519.7  |
| c4mim-br-p4    | -52.0 | -41.5 | -1343.5 | -4024.1 | -1093.7 | -3483.3 | -226.1  | -512.7  | -1093.9 | -3484.2 | -228.3  | -519.8  |
| c4mim-cl-p1    | -45.9 | -33.9 | -1244.3 | -3897.1 | -1093.3 | -3482.6 | -130.5  | -389.0  | -1093.5 | -3483.3 | -133.2  | -397.4  |
| c4mim-cl-p2    | -36.1 | -25.6 | -1241.9 | -3893.1 | -1094.4 | -3485.0 | -130.5  | -389.0  | -1094.5 | -3485.4 | -132.7  | -396.8  |
| c4mim-cl-p3    | -40.8 | -29.2 | -1243.6 | -3895.0 | -1094.0 | -3484.3 | -130.5  | -389.0  | -1094.1 | -3484.8 | -133.0  | -397.5  |
| c4mim-cl-p4    | -46.0 | -33.8 | -1244.4 | -3897.5 | -1093.5 | -3482.9 | -130.5  | -389.0  | -1093.7 | -3483.7 | -133.2  | -397.5  |
| c4mim-dca-p1   | -67.4 | -58.2 | -1745.4 | -5216.7 | -1091.9 | -3474.7 | -622.6  | -1705.5 | -1092.4 | -3476.5 | -624.5  | -1710.5 |



|                |       |       |         |          |         |         |         |         |         |         |         |         |
|----------------|-------|-------|---------|----------|---------|---------|---------|---------|---------|---------|---------|---------|
| c4mim-dca-p2   | -70.8 | -61.1 | -1747.5 | -5218.2  | -1092.1 | -3475.0 | -622.7  | -1705.2 | -1092.6 | -3476.9 | -624.6  | -1710.4 |
| c4mim-dca-p3   | -65.6 | -56.8 | -1743.8 | -5215.0  | -1091.4 | -3474.0 | -622.5  | -1705.2 | -1091.9 | -3475.9 | -624.3  | -1709.9 |
| c4mim-mes-p1   | -58.4 | -43.2 | -1869.3 | -5618.3  | -1092.9 | -3476.0 | -748.8  | -2111.5 | -1093.4 | -3477.9 | -752.8  | -2120.3 |
| c4mim-mes-p2   | -49.6 | -36.1 | -1863.7 | -5612.0  | -1091.6 | -3474.0 | -748.9  | -2111.6 | -1092.1 | -3475.7 | -752.4  | -2119.5 |
| c4mim-pf6-p1   | -45.3 | -32.2 | -2300.5 | -6746.6  | -1092.0 | -3474.6 | -1188.4 | -3246.7 | -1092.5 | -3476.4 | -1191.7 | -3254.3 |
| c4mim-pf6-p2   | -38.4 | -27.4 | -2296.4 | -6741.7  | -1091.3 | -3473.4 | -1188.4 | -3246.8 | -1091.7 | -3474.9 | -1191.2 | -3253.0 |
| c4mim-tos-p1   | -58.9 | -43.7 | -2517.4 | -7434.7  | -1092.8 | -3475.8 | -1396.7 | -3927.9 | -1093.3 | -3477.9 | -1400.6 | -3936.6 |
| c4mim-tos-p2   | -54.4 | -40.4 | -2515.3 | -7432.0  | -1092.7 | -3475.5 | -1396.8 | -3927.9 | -1093.2 | -3477.5 | -1400.3 | -3935.9 |
| c4mpyr-bf4-p1  | -36.4 | -26.9 | -1848.7 | -5759.8  | -1052.5 | -3593.3 | -779.7  | -2146.6 | -1052.8 | -3594.5 | -782.0  | -2152.4 |
| c4mpyr-bf4-p2  | -33.8 | -25.1 | -1848.0 | -5758.7  | -1052.8 | -3593.6 | -779.7  | -2146.7 | -1053.1 | -3594.6 | -781.8  | -2152.0 |
| c4mpyr-bf4-p3  | -33.7 | -25.2 | -1847.7 | -5758.6  | -1052.6 | -3593.6 | -779.7  | -2146.7 | -1052.8 | -3594.4 | -781.8  | -2152.0 |
| c4mpyr-br-p1   | -51.3 | -42.2 | -1302.7 | -4134.8  | -1053.2 | -3594.3 | -226.1  | -512.7  | -1053.3 | -3594.8 | -228.0  | -519.2  |
| c4mpyr-br-p2   | -48.6 | -39.7 | -1301.1 | -4133.5  | -1053.0 | -3594.4 | -226.1  | -512.7  | -1053.1 | -3594.8 | -228.0  | -519.1  |
| c4mpyr-br-p3   | -48.6 | -40.2 | -1301.4 | -4133.5  | -1053.1 | -3594.4 | -226.1  | -512.7  | -1053.2 | -3594.8 | -227.9  | -518.8  |
| c4mpyr-cl-p1   | -47.6 | -36.9 | -1205.0 | -4009.7  | -1053.2 | -3594.3 | -130.5  | -389.0  | -1053.3 | -3594.7 | -132.9  | -396.8  |
| c4mpyr-cl-p2   | -46.6 | -36.1 | -1204.3 | -4009.4  | -1053.0 | -3594.7 | -130.5  | -389.0  | -1053.1 | -3595.0 | -132.9  | -396.7  |
| c4mpyr-cl-p3   | -45.7 | -35.6 | -1204.0 | -4008.8  | -1053.2 | -3594.5 | -130.5  | -389.0  | -1053.2 | -3594.8 | -132.8  | -396.4  |
| c4mpyr-dca-p1  | -45.9 | -39.3 | -1690.7 | -5308.7  | -1052.7 | -3593.4 | -616.7  | -1690.6 | -1053.0 | -3594.4 | -618.2  | -1694.4 |
| c4mpyr-dca-p2  | -47.8 | -41.0 | -1692.3 | -5309.3  | -1052.7 | -3593.7 | -616.8  | -1690.5 | -1052.9 | -3594.6 | -618.4  | -1694.6 |
| c4mpyr-dca-p3  | -46.4 | -39.6 | -1691.8 | -5308.2  | -1052.7 | -3593.6 | -616.8  | -1690.4 | -1052.9 | -3594.6 | -618.4  | -1694.4 |
| c4mpyr-dca-p4  | -47.3 | -40.6 | -1691.6 | -5309.2  | -1052.7 | -3593.6 | -616.7  | -1690.5 | -1052.9 | -3594.6 | -618.3  | -1694.5 |
| c4mpyr-dca-p5  | -48.3 | -41.8 | -1692.2 | -5309.6  | -1052.7 | -3593.6 | -616.7  | -1690.5 | -1052.9 | -3594.5 | -618.3  | -1694.4 |
| c4mpyr-mes-p1  | -47.3 | -34.3 | -1824.0 | -5731.0  | -1052.5 | -3593.6 | -748.8  | -2112.7 | -1052.8 | -3594.7 | -752.4  | -2120.7 |
| c4mpyr-mes-p2  | -43.3 | -31.4 | -1822.7 | -5729.5  | -1053.2 | -3594.1 | -748.9  | -2112.8 | -1053.4 | -3595.0 | -752.2  | -2120.2 |
| c4mpyr-mes-p3  | -42.5 | -31.0 | -1822.0 | -5728.7  | -1052.7 | -3594.0 | -748.8  | -2112.7 | -1052.9 | -3594.9 | -752.0  | -2120.0 |
| c4mpyr-ntf2-p1 | -54.8 | -44.3 | -3452.4 | -10002.9 | -1052.8 | -3593.5 | -2374.8 | -6379.5 | -1053.2 | -3594.9 | -2377.3 | -6385.7 |
| c4mpyr-ntf2-p2 | -46.5 | -36.5 | -3448.9 | -9996.2  | -1052.5 | -3593.2 | -2374.6 | -6378.3 | -1052.9 | -3594.7 | -2376.9 | -6384.0 |
| c4mpyr-ntf2-p3 | -53.0 | -43.0 | -3451.5 | -10001.8 | -1052.6 | -3593.4 | -2374.7 | -6379.5 | -1052.8 | -3594.5 | -2377.3 | -6385.7 |
| c4mpyr-ntf2-p4 | -53.8 | -43.7 | -3451.8 | -10002.3 | -1052.6 | -3593.4 | -2374.7 | -6379.5 | -1052.9 | -3594.6 | -2377.2 | -6385.7 |
| c4mpyr-ntf2-p5 | -43.4 | -34.4 | -3447.2 | -9994.6  | -1052.3 | -3593.1 | -2374.6 | -6378.5 | -1052.6 | -3594.2 | -2376.7 | -6383.9 |
| c4mpyr-ntf2-p6 | -43.7 | -34.6 | -3448.0 | -9995.1  | -1052.7 | -3593.4 | -2374.7 | -6378.5 | -1053.0 | -3594.6 | -2376.9 | -6384.0 |
| c4mpyr-pf6-p1  | -37.2 | -27.1 | -2257.7 | -6860.8  | -1052.5 | -3593.2 | -1188.5 | -3247.2 | -1052.7 | -3594.3 | -1191.2 | -3253.3 |
| c4mpyr-pf6-p2  | -34.1 | -25.0 | -2256.7 | -6859.3  | -1052.7 | -3593.4 | -1188.5 | -3247.2 | -1052.9 | -3594.3 | -1190.9 | -3252.8 |
| c4mpyr-pf6-p3  | -34.0 | -25.0 | -2256.4 | -6859.2  | -1052.6 | -3593.4 | -1188.5 | -3247.2 | -1052.7 | -3594.1 | -1191.0 | -3252.8 |
| c4mpyr-tos-p1  | -44.9 | -32.3 | -2470.6 | -7545.5  | -1052.6 | -3593.6 | -1396.2 | -3928.7 | -1052.9 | -3594.9 | -1399.6 | -3936.4 |
| c4mpyr-tos-p2  | -40.9 | -29.3 | -2469.2 | -7543.9  | -1053.1 | -3594.1 | -1396.3 | -3928.7 | -1053.4 | -3595.1 | -1399.5 | -3935.9 |



### 2.2.5 CCD basis set

Table S 6: Raw CCD energies. Superscript \* indicates monomer calculated in the dimer basis set.

| ion pair       | E(int) | E(int) CP | E(dimer) SS | E(dimer) OS | E(A) SS | E(A) OS | E(B) SS | E(B) OS | E(A) SS* | E(A) OS* | E(B) SS* | E(B) OS* |
|----------------|--------|-----------|-------------|-------------|---------|---------|---------|---------|----------|----------|----------|----------|
| clmim-bf4-p1   | -34.2  | -14.5     | -1294.2     | -3566.1     | -669.7  | -1957.2 | -611.2  | -1588.1 | -670.4   | -1959.2  | -616.7   | -1599.5  |
| clmim-br-p1    | -36.4  | -22.0     | -789.0      | -2224.7     | -672.0  | -1967.2 | -101.1  | -237.0  | -672.5   | -1968.5  | -104.4   | -246.3   |
| clmim-br-p2    | -23.8  | -13.3     | -784.6      | -2216.9     | -671.8  | -1967.9 | -101.1  | -237.0  | -672.0   | -1968.4  | -103.5   | -244.3   |
| clmim-cl-p1    | -32.6  | -15.8     | -781.5      | -2242.5     | -671.8  | -1966.8 | -96.2   | -256.6  | -672.3   | -1968.0  | -100.3   | -267.6   |
| clmim-cl-p2    | -24.8  | -12.0     | -780.1      | -2238.1     | -672.0  | -1968.5 | -96.2   | -256.6  | -672.2   | -1969.0  | -99.2    | -265.7   |
| clmim-dca-p1   | -55.0  | -40.7     | -1228.7     | -3362.6     | -670.1  | -1958.6 | -533.7  | -1373.9 | -671.2   | -1961.2  | -537.1   | -1381.2  |
| clmim-dca-p2   | -41.8  | -30.9     | -1223.5     | -3356.2     | -670.3  | -1960.1 | -533.4  | -1374.0 | -670.8   | -1961.4  | -536.1   | -1380.5  |
| clmim-mes-p1   | -44.1  | -19.1     | -1290.9     | -3593.7     | -670.1  | -1958.0 | -601.2  | -1611.3 | -670.9   | -1960.1  | -608.6   | -1625.9  |
| clmim-ntf2-p1  | -69.3  | -44.7     | -2603.2     | -6829.7     | -669.7  | -1957.4 | -1903.8 | -4832.8 | -670.6   | -1959.9  | -1910.9  | -4846.8  |
| clmim-ntf2-p2  | -42.9  | -26.1     | -2593.0     | -6813.7     | -670.1  | -1959.7 | -1903.0 | -4830.9 | -670.5   | -1960.8  | -1907.9  | -4841.3  |
| clmim-ntf2-p3  | -41.3  | -21.2     | -2592.4     | -6812.4     | -669.8  | -1958.4 | -1903.6 | -4831.7 | -670.4   | -1960.1  | -1909.5  | -4843.6  |
| clmim-pf6-p1   | -37.1  | -16.0     | -1602.2     | -4362.1     | -669.7  | -1957.3 | -917.8  | -2382.3 | -670.2   | -1959.0  | -924.1   | -2394.9  |
| clmim-tos-p1   | -40.3  | -17.1     | -1855.0     | -5075.6     | -669.8  | -1957.8 | -1167.1 | -3095.6 | -670.6   | -1959.9  | -1173.8  | -3109.0  |
| clmpyr-bf4-p1  | -36.4  | -16.7     | -1257.3     | -3662.4     | -631.2  | -2054.5 | -610.9  | -1586.7 | -631.5   | -2055.5  | -616.7   | -1599.2  |
| clmpyr-bf4-p2  | -33.4  | -15.9     | -1256.2     | -3660.8     | -631.3  | -2054.7 | -610.9  | -1586.7 | -631.7   | -2055.6  | -616.1   | -1597.9  |
| clmpyr-br-p1   | -39.3  | -26.6     | -750.6      | -2314.4     | -631.8  | -2055.8 | -101.1  | -237.0  | -632.0   | -2056.3  | -104.3   | -245.9   |
| clmpyr-br-p2   | -37.5  | -25.5     | -749.8      | -2313.7     | -631.8  | -2056.1 | -101.1  | -237.0  | -632.0   | -2056.5  | -104.0   | -245.4   |
| clmpyr-cl-p1   | -36.8  | -22.3     | -744.1      | -2333.3     | -631.8  | -2055.9 | -96.2   | -256.6  | -632.0   | -2056.3  | -99.8    | -266.8   |
| clmpyr-cl-p2   | -35.8  | -22.0     | -743.6      | -2333.0     | -631.8  | -2056.1 | -96.2   | -256.6  | -632.0   | -2056.5  | -99.6    | -266.4   |
| clmpyr-dca-p1  | -39.5  | -28.4     | -1177.7     | -3433.1     | -631.7  | -2055.4 | -527.0  | -1357.2 | -632.1   | -2056.4  | -530.1   | -1363.7  |
| clmpyr-dca-p2  | -43.6  | -31.9     | -1178.9     | -3435.8     | -631.5  | -2055.0 | -527.0  | -1357.6 | -632.0   | -2056.2  | -530.2   | -1364.3  |
| clmpyr-dca-p3  | -40.3  | -29.3     | -1175.9     | -3435.9     | -631.3  | -2054.8 | -527.1  | -1358.4 | -631.7   | -2055.9  | -529.9   | -1365.2  |
| clmpyr-dca-p4  | -41.9  | -30.8     | -1177.9     | -3434.6     | -631.3  | -2054.8 | -527.0  | -1357.6 | -631.7   | -2056.0  | -530.1   | -1363.9  |
| clmpyr-mes-p1  | -44.0  | -19.9     | -1252.8     | -3691.6     | -631.2  | -2055.0 | -601.4  | -1613.0 | -631.6   | -2056.1  | -608.8   | -1628.0  |
| clmpyr-mes-p2  | -39.5  | -18.4     | -1251.2     | -3689.6     | -631.4  | -2055.5 | -601.4  | -1612.9 | -631.8   | -2056.5  | -607.8   | -1626.3  |
| clmpyr-ntf2-p1 | -53.2  | -33.7     | -2557.3     | -6917.8     | -631.5  | -2054.5 | -1902.8 | -4833.1 | -631.9   | -2055.5  | -1908.9  | -4845.0  |
| clmpyr-ntf2-p2 | -41.4  | -22.9     | -2552.3     | -6909.4     | -631.2  | -2054.3 | -1902.8 | -4832.0 | -631.6   | -2055.2  | -1908.5  | -4843.5  |
| clmpyr-ntf2-p3 | -51.8  | -33.0     | -2556.9     | -6916.7     | -631.4  | -2054.8 | -1902.7 | -4832.8 | -631.8   | -2055.7  | -1908.6  | -4844.4  |
| clmpyr-ntf2-p5 | -43.0  | -23.6     | -2553.1     | -6910.3     | -631.4  | -2054.5 | -1902.7 | -4831.8 | -631.8   | -2055.5  | -1908.7  | -4843.8  |
| clmpyr-pf6-p1  | -37.8  | -17.2     | -1564.8     | -4459.2     | -631.2  | -2054.4 | -917.9  | -2382.7 | -631.5   | -2055.2  | -924.3   | -2395.8  |
| clmpyr-pf6-p2  | -35.1  | -16.2     | -1563.8     | -4458.0     | -631.3  | -2054.6 | -917.9  | -2382.8 | -631.5   | -2055.2  | -923.8   | -2394.9  |
| clmpyr-tos-p1  | -40.1  | -17.1     | -1816.7     | -5172.8     | -631.2  | -2055.0 | -1166.5 | -3096.7 | -631.6   | -2056.1  | -1173.7  | -3110.9  |
| clmpyr-tos-p2  | -35.1  | -14.9     | -1814.4     | -5170.3     | -631.3  | -2055.1 | -1166.5 | -3096.7 | -631.7   | -2056.0  | -1172.9  | -3109.2  |



|               |       |       |         |         |        |         |         |         |        |         |         |         |
|---------------|-------|-------|---------|---------|--------|---------|---------|---------|--------|---------|---------|---------|
| c2mim-bf4-p1  | -36.3 | -14.9 | -1385.3 | -3855.9 | -759.7 | -2246.0 | -611.2  | -1588.1 | -760.4 | -2248.0 | -617.3  | -1600.7 |
| c2mim-bf4-p2  | -33.9 | -14.4 | -1383.8 | -3854.0 | -759.2 | -2245.3 | -611.2  | -1588.1 | -759.9 | -2247.2 | -616.7  | -1599.5 |
| c2mim-br-p1   | -37.3 | -22.4 | -879.0  | -2513.8 | -761.6 | -2255.8 | -101.1  | -237.0  | -762.1 | -2257.0 | -104.6  | -246.7  |
| c2mim-br-p2   | -27.6 | -15.5 | -876.9  | -2509.3 | -762.4 | -2258.1 | -101.1  | -237.0  | -762.7 | -2258.8 | -103.9  | -245.3  |
| c2mim-br-p3   | -27.3 | -15.4 | -876.1  | -2508.4 | -761.8 | -2257.3 | -101.1  | -237.0  | -762.0 | -2257.9 | -104.0  | -245.2  |
| c2mim-br-p4   | -37.7 | -23.1 | -879.6  | -2514.8 | -762.0 | -2256.6 | -101.1  | -237.0  | -762.5 | -2257.9 | -104.5  | -246.4  |
| c2mim-cl-p1   | -33.8 | -16.2 | -871.7  | -2532.0 | -761.5 | -2255.6 | -96.2   | -256.6  | -762.0 | -2256.8 | -100.4  | -268.3  |
| c2mim-cl-p2   | -27.7 | -13.3 | -871.9  | -2530.0 | -762.6 | -2258.8 | -96.2   | -256.6  | -762.9 | -2259.4 | -99.6   | -266.7  |
| c2mim-cl-p3   | -27.5 | -13.1 | -871.1  | -2529.2 | -762.0 | -2257.9 | -96.2   | -256.6  | -762.2 | -2258.5 | -99.7   | -266.7  |
| c2mim-cl-p4   | -33.6 | -16.6 | -871.8  | -2532.4 | -761.8 | -2256.1 | -96.2   | -256.6  | -762.3 | -2257.4 | -100.3  | -267.7  |
| c2mim-dca-p1  | -57.0 | -42.9 | -1319.0 | -3652.2 | -759.6 | -2246.6 | -533.6  | -1374.3 | -760.6 | -2249.1 | -537.0  | -1381.5 |
| c2mim-dca-p2  | -53.7 | -39.8 | -1317.9 | -3650.0 | -759.8 | -2246.6 | -533.6  | -1374.1 | -760.7 | -2249.1 | -537.1  | -1381.2 |
| c2mim-dca-p3  | -57.5 | -42.9 | -1319.9 | -3652.4 | -760.0 | -2246.8 | -533.8  | -1374.1 | -761.0 | -2249.3 | -537.4  | -1381.8 |
| c2mim-dca-p4  | -54.2 | -40.8 | -1318.0 | -3650.2 | -759.7 | -2246.6 | -533.7  | -1374.1 | -760.6 | -2249.0 | -536.9  | -1380.9 |
| c2mim-dca-p5  | -55.4 | -41.0 | -1318.5 | -3651.0 | -759.7 | -2246.7 | -533.8  | -1373.9 | -760.7 | -2249.3 | -537.1  | -1381.3 |
| c2mim-dca-p6  | -55.5 | -41.3 | -1318.1 | -3651.0 | -759.6 | -2246.2 | -533.8  | -1374.1 | -760.6 | -2248.8 | -537.1  | -1381.2 |
| c2mim-mes-p1  | -49.7 | -22.8 | -1383.6 | -3885.8 | -760.3 | -2247.1 | -601.2  | -1611.1 | -761.1 | -2249.1 | -609.2  | -1627.1 |
| c2mim-mes-p2  | -45.3 | -19.9 | -1380.8 | -3882.6 | -759.6 | -2246.0 | -601.2  | -1611.3 | -760.4 | -2248.0 | -608.8  | -1626.4 |
| c2mim-ntf2-p1 | -75.5 | -48.2 | -2696.1 | -7121.8 | -759.7 | -2246.2 | -1903.7 | -4832.7 | -760.7 | -2248.7 | -1911.8 | -4848.4 |
| c2mim-ntf2-p2 | -54.0 | -32.3 | -2687.8 | -7109.7 | -760.1 | -2248.2 | -1903.4 | -4831.9 | -760.6 | -2249.6 | -1909.9 | -4845.1 |
| c2mim-ntf2-p3 | -45.2 | -23.2 | -2684.1 | -7102.9 | -759.6 | -2246.9 | -1903.6 | -4831.7 | -760.2 | -2248.5 | -1910.2 | -4844.9 |
| c2mim-ntf2-p4 | -65.9 | -41.6 | -2692.2 | -7116.6 | -759.6 | -2246.1 | -1904.0 | -4833.1 | -760.5 | -2248.4 | -1911.1 | -4847.2 |
| c2mim-pf6-p1  | -41.5 | -17.3 | -1694.0 | -4653.1 | -759.6 | -2245.9 | -917.8  | -2382.3 | -760.2 | -2247.7 | -925.1  | -2396.8 |
| c2mim-pf6-p2  | -37.5 | -16.3 | -1691.8 | -4650.4 | -759.2 | -2245.3 | -917.8  | -2382.4 | -759.8 | -2246.9 | -924.1  | -2395.0 |
| c2mim-tos-p1  | -47.6 | -21.2 | -1948.6 | -5368.4 | -760.2 | -2246.9 | -1167.0 | -3095.4 | -761.0 | -2249.2 | -1174.8 | -3110.8 |
| c2mim-tos-p2  | -42.2 | -17.9 | -1945.6 | -5364.7 | -759.6 | -2246.0 | -1167.0 | -3095.5 | -760.4 | -2248.2 | -1174.2 | -3109.6 |
| c2mpyr-bf4-p1 | -37.2 | -17.0 | -1348.9 | -3953.8 | -722.5 | -2345.4 | -610.9  | -1586.7 | -722.9 | -2346.5 | -616.9  | -1599.5 |
| c2mpyr-bf4-p2 | -35.3 | -16.2 | -1348.7 | -3953.2 | -723.0 | -2345.9 | -610.9  | -1586.7 | -723.4 | -2347.0 | -616.5  | -1598.8 |
| c2mpyr-bf4-p3 | -34.3 | -16.3 | -1347.9 | -3952.4 | -722.6 | -2345.7 | -610.9  | -1586.7 | -723.0 | -2346.6 | -616.2  | -1598.2 |
| c2mpyr-br-p1  | -40.2 | -27.1 | -842.3  | -2605.8 | -723.1 | -2346.6 | -101.1  | -237.0  | -723.4 | -2347.2 | -104.4  | -246.1  |
| c2mpyr-br-p2  | -39.2 | -26.4 | -841.8  | -2605.7 | -723.0 | -2347.2 | -101.1  | -237.0  | -723.3 | -2347.8 | -104.3  | -245.9  |
| c2mpyr-br-p3  | -38.3 | -26.0 | -841.4  | -2604.9 | -723.1 | -2346.8 | -101.1  | -237.0  | -723.3 | -2347.3 | -104.1  | -245.6  |
| c2mpyr-cl-p1  | -37.5 | -22.6 | -835.6  | -2624.6 | -723.2 | -2346.7 | -96.2   | -256.6  | -723.4 | -2347.2 | -99.9   | -267.0  |
| c2mpyr-cl-p2  | -36.7 | -22.3 | -835.1  | -2624.4 | -722.9 | -2347.0 | -96.2   | -256.6  | -723.1 | -2347.5 | -99.8   | -266.7  |
| c2mpyr-cl-p3  | -36.2 | -22.1 | -835.0  | -2624.1 | -723.2 | -2346.9 | -96.2   | -256.6  | -723.4 | -2347.4 | -99.7   | -266.5  |
| c2mpyr-dca-p1 | -39.8 | -28.6 | -1269.1 | -3724.1 | -723.0 | -2346.2 | -527.0  | -1357.3 | -723.5 | -2347.3 | -530.1  | -1363.7 |
| c2mpyr-dca-p2 | -43.1 | -31.3 | -1270.2 | -3726.2 | -722.7 | -2345.9 | -527.1  | -1357.7 | -723.2 | -2347.2 | -530.3  | -1364.3 |
| c2mpyr-dca-p3 | -44.1 | -32.3 | -1270.3 | -3727.0 | -722.7 | -2345.8 | -527.0  | -1357.6 | -723.3 | -2347.1 | -530.3  | -1364.4 |
| c2mpyr-mes-p1 | -45.8 | -20.7 | -1344.8 | -3983.7 | -722.5 | -2345.8 | -601.4  | -1613.0 | -723.0 | -2347.0 | -609.2  | -1628.6 |



|                |       |       |         |         |        |         |         |         |        |         |         |         |
|----------------|-------|-------|---------|---------|--------|---------|---------|---------|--------|---------|---------|---------|
| c2mpyr-mes-p2  | -42.3 | -18.9 | -1343.9 | -3982.5 | -723.2 | -2346.4 | -601.4  | -1613.1 | -723.6 | -2347.5 | -608.7  | -1627.7 |
| c2mpyr-mes-p3  | -41.1 | -19.0 | -1343.1 | -3981.5 | -722.8 | -2346.4 | -601.4  | -1613.0 | -723.2 | -2347.4 | -608.1  | -1626.8 |
| c2mpyr-ntf2-p1 | -54.1 | -34.1 | -2649.2 | -7209.2 | -722.8 | -2345.3 | -1902.9 | -4833.2 | -723.3 | -2346.4 | -1909.1 | -4845.5 |
| c2mpyr-ntf2-p2 | -43.5 | -24.2 | -2644.6 | -7201.6 | -722.5 | -2345.2 | -1902.8 | -4832.2 | -722.9 | -2346.2 | -1908.8 | -4844.2 |
| c2mpyr-ntf2-p3 | -54.1 | -33.3 | -2649.0 | -7209.1 | -722.6 | -2345.4 | -1902.9 | -4833.1 | -723.1 | -2346.6 | -1909.3 | -4845.9 |
| c2mpyr-ntf2-p4 | -52.3 | -33.1 | -2648.3 | -7208.2 | -722.7 | -2345.5 | -1902.9 | -4833.2 | -723.1 | -2346.5 | -1908.8 | -4844.9 |
| c2mpyr-ntf2-p5 | -44.8 | -24.8 | -2644.9 | -7202.1 | -722.4 | -2345.2 | -1902.7 | -4832.0 | -722.8 | -2346.3 | -1908.9 | -4844.3 |
| c2mpyr-ntf2-p6 | -42.8 | -23.5 | -2644.5 | -7201.4 | -722.7 | -2345.4 | -1902.8 | -4832.1 | -723.1 | -2346.4 | -1908.8 | -4844.1 |
| c2mpyr-pf6-p1  | -38.1 | -17.4 | -1656.5 | -4750.5 | -722.7 | -2345.5 | -917.9  | -2382.7 | -723.0 | -2346.4 | -924.3  | -2395.8 |
| c2mpyr-pf6-p2  | -36.4 | -16.5 | -1655.8 | -4749.6 | -722.8 | -2345.6 | -917.9  | -2382.8 | -723.1 | -2346.5 | -924.0  | -2395.3 |
| c2mpyr-pf6-p3  | -35.8 | -16.4 | -1655.3 | -4749.2 | -722.6 | -2345.5 | -917.9  | -2382.8 | -722.9 | -2346.2 | -923.9  | -2395.1 |
| c2mpyr-tos-p1  | -42.0 | -18.1 | -1908.7 | -5464.9 | -722.5 | -2345.8 | -1166.6 | -3096.7 | -723.0 | -2347.0 | -1174.0 | -3111.5 |
| c2mpyr-tos-p2  | -38.8 | -16.3 | -1907.8 | -5463.8 | -723.1 | -2346.3 | -1166.6 | -3096.8 | -723.6 | -2347.5 | -1173.5 | -3110.6 |
| c3mim-bf4-p1   | -37.3 | -15.1 | -1474.4 | -4144.3 | -848.3 | -2533.8 | -611.2  | -1588.1 | -849.1 | -2535.8 | -617.5  | -1601.2 |
| c3mim-bf4-p2   | -36.6 | -15.4 | -1473.9 | -4143.7 | -848.2 | -2533.5 | -611.2  | -1588.1 | -849.0 | -2535.6 | -617.2  | -1600.5 |
| c3mim-br-p1    | -37.9 | -22.6 | -967.9  | -2802.8 | -850.3 | -2544.5 | -101.1  | -237.0  | -850.8 | -2545.8 | -104.6  | -246.9  |
| c3mim-br-p2    | -28.1 | -15.8 | -965.5  | -2798.0 | -850.9 | -2546.5 | -101.1  | -237.0  | -851.2 | -2547.2 | -104.0  | -245.4  |
| c3mim-br-p3    | -30.7 | -17.5 | -966.4  | -2799.0 | -850.6 | -2546.0 | -101.1  | -237.0  | -850.8 | -2546.7 | -104.3  | -246.1  |
| c3mim-br-p4    | -39.3 | -23.5 | -968.5  | -2803.9 | -850.3 | -2544.7 | -101.1  | -237.0  | -850.9 | -2546.0 | -104.8  | -247.2  |
| c3mim-cl-p1    | -34.2 | -16.4 | -960.6  | -2820.9 | -850.2 | -2544.3 | -96.2   | -256.6  | -850.7 | -2545.5 | -100.5  | -268.4  |
| c3mim-cl-p2    | -28.0 | -13.4 | -960.4  | -2818.6 | -851.1 | -2547.2 | -96.2   | -256.6  | -851.4 | -2547.8 | -99.7   | -266.8  |
| c3mim-cl-p3    | -30.0 | -14.2 | -960.9  | -2819.2 | -850.8 | -2546.6 | -96.2   | -256.6  | -851.0 | -2547.2 | -100.1  | -267.6  |
| c3mim-cl-p4    | -35.0 | -16.7 | -960.7  | -2821.5 | -850.1 | -2544.3 | -96.2   | -256.6  | -850.7 | -2545.6 | -100.7  | -268.6  |
| c3mim-dca-p1   | -58.0 | -43.6 | -1408.0 | -3940.5 | -848.2 | -2534.3 | -533.6  | -1374.4 | -849.2 | -2536.8 | -537.1  | -1381.7 |
| c3mim-dca-p2   | -58.8 | -44.1 | -1408.7 | -3941.3 | -848.6 | -2534.8 | -533.7  | -1374.2 | -849.7 | -2537.5 | -537.2  | -1381.5 |
| c3mim-dca-p3   | -51.5 | -37.9 | -1405.9 | -3937.7 | -848.7 | -2535.7 | -533.5  | -1374.3 | -849.4 | -2537.5 | -536.8  | -1382.0 |
| c3mim-dca-p4   | -60.4 | -44.9 | -1409.6 | -3941.3 | -848.4 | -2534.4 | -533.7  | -1374.0 | -849.4 | -2537.0 | -537.5  | -1382.0 |
| c3mim-dca-p5   | -56.6 | -42.4 | -1406.7 | -3939.0 | -847.8 | -2533.7 | -533.6  | -1374.1 | -848.9 | -2536.3 | -537.0  | -1381.2 |
| c3mim-dca-p6   | -55.6 | -41.4 | -1406.4 | -3938.6 | -847.9 | -2533.6 | -533.8  | -1374.1 | -848.9 | -2536.3 | -537.1  | -1381.3 |
| c3mim-mes-p1   | -52.5 | -24.0 | -1473.6 | -4175.3 | -849.0 | -2535.1 | -601.2  | -1611.2 | -849.8 | -2537.2 | -609.7  | -1628.1 |
| c3mim-mes-p2   | -45.8 | -20.2 | -1469.4 | -4170.6 | -848.0 | -2533.5 | -601.2  | -1611.4 | -848.8 | -2535.6 | -608.8  | -1626.5 |
| c3mim-ntf2-p1  | -79.0 | -50.3 | -2786.3 | -7411.6 | -848.3 | -2534.0 | -1903.8 | -4832.8 | -849.4 | -2536.6 | -1912.2 | -4849.4 |
| c3mim-ntf2-p2  | -58.3 | -34.7 | -2778.3 | -7399.7 | -848.6 | -2535.8 | -1903.4 | -4831.9 | -849.2 | -2537.3 | -1910.5 | -4846.3 |
| c3mim-ntf2-p3  | -47.3 | -24.2 | -2773.6 | -7391.8 | -848.2 | -2534.6 | -1903.6 | -4831.7 | -848.8 | -2536.4 | -1910.5 | -4845.6 |
| c3mim-ntf2-p4  | -66.9 | -43.0 | -2780.7 | -7404.7 | -847.9 | -2533.3 | -1904.0 | -4833.2 | -848.8 | -2535.6 | -1910.9 | -4847.1 |
| c3mim-pf6-p1   | -41.9 | -18.6 | -1782.3 | -4940.9 | -848.0 | -2533.5 | -917.7  | -2382.2 | -848.7 | -2535.2 | -924.7  | -2396.1 |
| c3mim-pf6-p2   | -37.5 | -16.4 | -1780.2 | -4938.0 | -847.7 | -2532.8 | -917.8  | -2382.4 | -848.2 | -2534.5 | -924.1  | -2395.0 |
| c3mim-tos-p1   | -50.9 | -22.8 | -2038.7 | -5658.2 | -848.8 | -2534.9 | -1167.0 | -3095.4 | -849.7 | -2537.2 | -1175.3 | -3111.8 |
| c3mim-tos-p2   | -47.9 | -21.6 | -2036.8 | -5655.8 | -848.3 | -2533.8 | -1167.1 | -3095.6 | -849.1 | -2536.1 | -1174.8 | -3111.0 |



|                |       |       |         |         |        |         |         |         |        |         |         |         |
|----------------|-------|-------|---------|---------|--------|---------|---------|---------|--------|---------|---------|---------|
| c3mpyr-bf4-p1  | -37.7 | -17.1 | -1437.8 | -4242.9 | -811.2 | -2634.2 | -610.9  | -1586.7 | -811.7 | -2635.3 | -617.0  | -1599.7 |
| c3mpyr-bf4-p2  | -35.7 | -16.3 | -1437.4 | -4242.1 | -811.6 | -2634.5 | -610.9  | -1586.7 | -812.0 | -2635.6 | -616.6  | -1599.0 |
| c3mpyr-bf4-p3  | -34.7 | -16.4 | -1436.7 | -4241.3 | -811.3 | -2634.4 | -610.9  | -1586.7 | -811.7 | -2635.4 | -616.3  | -1598.3 |
| c3mpyr-br-p1   | -41.0 | -27.6 | -931.4  | -2895.0 | -811.9 | -2635.4 | -101.1  | -237.0  | -812.1 | -2635.9 | -104.4  | -246.3  |
| c3mpyr-br-p2   | -38.8 | -26.2 | -930.2  | -2893.9 | -811.7 | -2635.5 | -101.1  | -237.0  | -812.0 | -2636.1 | -104.2  | -245.7  |
| c3mpyr-br-p3   | -39.0 | -26.4 | -930.3  | -2894.1 | -811.8 | -2635.6 | -101.1  | -237.0  | -812.0 | -2636.1 | -104.2  | -245.7  |
| c3mpyr-cl-p1   | -37.9 | -22.8 | -924.5  | -2913.6 | -811.9 | -2635.5 | -96.2   | -256.6  | -812.1 | -2636.0 | -100.0  | -267.2  |
| c3mpyr-cl-p2   | -37.0 | -22.4 | -923.9  | -2913.2 | -811.7 | -2635.7 | -96.2   | -256.6  | -811.9 | -2636.2 | -99.8   | -266.8  |
| c3mpyr-cl-p3   | -36.5 | -22.2 | -923.8  | -2913.0 | -811.9 | -2635.7 | -96.2   | -256.6  | -812.1 | -2636.2 | -99.7   | -266.6  |
| c3mpyr-dca-p1  | -41.2 | -29.4 | -1358.3 | -4013.7 | -811.5 | -2634.6 | -527.1  | -1357.5 | -811.9 | -2635.8 | -530.4  | -1364.5 |
| c3mpyr-dca-p2  | -43.1 | -31.3 | -1358.8 | -4014.9 | -811.3 | -2634.6 | -527.1  | -1357.7 | -811.9 | -2635.9 | -530.3  | -1364.3 |
| c3mpyr-dca-p3  | -39.6 | -28.7 | -1356.0 | -4015.7 | -811.5 | -2634.6 | -527.3  | -1358.7 | -811.9 | -2635.8 | -530.0  | -1365.2 |
| c3mpyr-dca-p4  | -41.7 | -30.6 | -1358.1 | -4014.5 | -811.6 | -2634.7 | -527.0  | -1357.6 | -812.1 | -2635.9 | -530.0  | -1363.9 |
| c3mpyr-dca-p5  | -44.1 | -32.1 | -1359.0 | -4015.7 | -811.4 | -2634.6 | -527.0  | -1357.6 | -812.0 | -2635.9 | -530.3  | -1364.4 |
| c3mpyr-mes-p1  | -46.7 | -21.1 | -1433.8 | -4273.0 | -811.2 | -2634.5 | -601.4  | -1613.0 | -811.7 | -2635.7 | -609.4  | -1628.9 |
| c3mpyr-mes-p2  | -42.8 | -19.1 | -1432.7 | -4271.5 | -811.8 | -2635.1 | -601.4  | -1613.1 | -812.3 | -2636.2 | -608.7  | -1627.8 |
| c3mpyr-mes-p3  | -42.1 | -19.4 | -1432.2 | -4270.9 | -811.4 | -2635.1 | -601.4  | -1613.0 | -811.9 | -2636.2 | -608.3  | -1627.1 |
| c3mpyr-ntf2-p1 | -56.6 | -35.3 | -2739.0 | -7499.7 | -811.6 | -2634.3 | -1902.9 | -4833.2 | -812.1 | -2635.5 | -1909.5 | -4846.3 |
| c3mpyr-ntf2-p2 | -42.1 | -23.9 | -2733.1 | -7489.2 | -811.3 | -2634.1 | -1902.7 | -4832.0 | -811.7 | -2635.0 | -1908.3 | -4843.3 |
| c3mpyr-ntf2-p3 | -54.1 | -33.5 | -2737.7 | -7497.9 | -811.2 | -2634.1 | -1902.9 | -4833.2 | -811.7 | -2635.2 | -1909.3 | -4845.9 |
| c3mpyr-ntf2-p4 | -54.5 | -34.2 | -2737.9 | -7498.1 | -811.4 | -2634.3 | -1902.9 | -4833.0 | -811.8 | -2635.3 | -1909.1 | -4845.5 |
| c3mpyr-ntf2-p5 | -44.9 | -24.9 | -2733.6 | -7490.9 | -811.1 | -2633.9 | -1902.7 | -4832.0 | -811.5 | -2635.0 | -1908.9 | -4844.3 |
| c3mpyr-ntf2-p6 | -44.9 | -24.5 | -2734.0 | -7491.4 | -811.4 | -2634.2 | -1902.8 | -4832.0 | -811.8 | -2635.2 | -1909.1 | -4844.7 |
| c3mpyr-pf6-p1  | -39.3 | -17.8 | -1745.3 | -5039.8 | -811.1 | -2634.0 | -917.9  | -2382.7 | -811.5 | -2634.9 | -924.6  | -2396.3 |
| c3mpyr-pf6-p2  | -36.4 | -16.5 | -1744.4 | -5038.3 | -811.4 | -2634.3 | -917.9  | -2382.8 | -811.8 | -2635.1 | -924.0  | -2395.3 |
| c3mpyr-pf6-p3  | -36.3 | -16.7 | -1744.2 | -5038.3 | -811.3 | -2634.2 | -917.9  | -2382.8 | -811.6 | -2635.0 | -924.0  | -2395.2 |
| c3mpyr-tos-p1  | -43.2 | -18.6 | -1997.8 | -5754.3 | -811.2 | -2634.5 | -1166.5 | -3096.7 | -811.7 | -2635.8 | -1174.2 | -3111.8 |
| c3mpyr-tos-p2  | -39.3 | -16.7 | -1996.6 | -5752.8 | -811.8 | -2635.0 | -1166.5 | -3096.8 | -812.3 | -2636.2 | -1173.6 | -3110.6 |
| c4mim-bf4-p1   | -37.9 | -15.3 | -1563.0 | -4432.4 | -936.7 | -2821.5 | -611.2  | -1588.1 | -937.5 | -2823.6 | -617.6  | -1601.4 |
| c4mim-bf4-p2   | -36.8 | -15.5 | -1562.3 | -4431.4 | -936.5 | -2821.0 | -611.2  | -1588.1 | -937.3 | -2823.1 | -617.2  | -1600.6 |
| c4mim-br-p1    | -38.6 | -23.1 | -1056.7 | -3091.9 | -938.7 | -2833.1 | -101.1  | -237.0  | -939.3 | -2834.4 | -104.7  | -247.1  |
| c4mim-br-p2    | -29.0 | -16.3 | -1054.4 | -3087.1 | -939.4 | -2835.1 | -101.1  | -237.0  | -939.7 | -2835.8 | -104.1  | -245.7  |
| c4mim-br-p3    | -32.1 | -18.4 | -1055.5 | -3088.4 | -939.1 | -2834.6 | -101.1  | -237.0  | -939.3 | -2835.3 | -104.5  | -246.4  |
| c4mim-br-p4    | -39.8 | -23.8 | -1057.0 | -3092.6 | -938.7 | -2833.0 | -101.1  | -237.0  | -939.2 | -2834.3 | -104.9  | -247.3  |
| c4mim-cl-p1    | -34.7 | -16.7 | -1049.2 | -3109.8 | -938.6 | -2832.9 | -96.2   | -256.6  | -939.1 | -2834.1 | -100.5  | -268.5  |
| c4mim-cl-p2    | -28.6 | -13.7 | -1049.1 | -3107.6 | -939.6 | -2835.7 | -96.2   | -256.6  | -939.9 | -2836.4 | -99.8   | -267.0  |
| c4mim-cl-p3    | -31.0 | -14.7 | -1049.7 | -3108.3 | -939.2 | -2835.1 | -96.2   | -256.6  | -939.5 | -2835.7 | -100.3  | -267.9  |
| c4mim-cl-p4    | -35.4 | -16.9 | -1049.2 | -3110.1 | -938.5 | -2832.6 | -96.2   | -256.6  | -939.0 | -2833.9 | -100.8  | -268.7  |
| c4mim-dca-p1   | -58.7 | -44.1 | -1496.8 | -4228.6 | -936.6 | -2822.0 | -533.6  | -1374.4 | -937.7 | -2824.6 | -537.1  | -1381.8 |



|                |       |       |         |         |        |         |         |         |        |         |         |         |
|----------------|-------|-------|---------|---------|--------|---------|---------|---------|--------|---------|---------|---------|
| c4mim-dca-p2   | -61.8 | -46.0 | -1498.7 | -4229.9 | -936.8 | -2822.2 | -533.7  | -1374.1 | -937.9 | -2824.8 | -537.6  | -1382.3 |
| c4mim-dca-p3   | -56.9 | -42.6 | -1495.2 | -4226.9 | -936.2 | -2821.2 | -533.6  | -1374.1 | -937.2 | -2823.9 | -537.0  | -1381.3 |
| c4mim-mes-p1   | -53.7 | -24.7 | -1562.6 | -4463.7 | -937.4 | -2822.8 | -601.2  | -1611.2 | -938.3 | -2824.9 | -609.8  | -1628.5 |
| c4mim-mes-p2   | -46.0 | -20.2 | -1557.7 | -4458.2 | -936.3 | -2821.0 | -601.2  | -1611.4 | -937.1 | -2823.1 | -608.9  | -1626.6 |
| c4mim-pf6-p1   | -44.3 | -18.4 | -1872.3 | -5230.4 | -936.7 | -2821.6 | -917.8  | -2382.3 | -937.3 | -2823.4 | -925.7  | -2397.9 |
| c4mim-pf6-p2   | -37.6 | -16.4 | -1868.5 | -5225.6 | -936.0 | -2820.4 | -917.8  | -2382.4 | -936.6 | -2822.0 | -924.1  | -2395.1 |
| c4mim-tos-p1   | -52.9 | -24.2 | -2128.2 | -5947.2 | -937.3 | -2822.7 | -1167.0 | -3095.4 | -938.3 | -2825.1 | -1175.5 | -3112.3 |
| c4mim-tos-p2   | -49.0 | -22.8 | -2126.2 | -5944.4 | -937.1 | -2822.1 | -1167.0 | -3095.4 | -938.1 | -2824.5 | -1174.7 | -3110.6 |
| c4mpyr-bf4-p1  | -37.8 | -17.1 | -1526.2 | -4531.1 | -899.6 | -2922.3 | -610.9  | -1586.7 | -900.0 | -2923.4 | -617.0  | -1599.8 |
| c4mpyr-bf4-p2  | -35.8 | -16.4 | -1525.7 | -4530.4 | -899.9 | -2922.7 | -610.9  | -1586.7 | -900.4 | -2923.8 | -616.6  | -1599.0 |
| c4mpyr-bf4-p3  | -34.9 | -16.5 | -1525.2 | -4529.7 | -899.7 | -2922.6 | -610.9  | -1586.7 | -900.1 | -2923.6 | -616.3  | -1598.4 |
| c4mpyr-br-p1   | -41.2 | -27.7 | -1019.8 | -3183.3 | -900.2 | -2923.5 | -101.1  | -237.0  | -900.5 | -2924.1 | -104.5  | -246.3  |
| c4mpyr-br-p2   | -39.0 | -26.3 | -1018.6 | -3182.3 | -900.1 | -2923.7 | -101.1  | -237.0  | -900.3 | -2924.2 | -104.3  | -245.7  |
| c4mpyr-br-p3   | -39.2 | -26.5 | -1018.8 | -3182.4 | -900.2 | -2923.7 | -101.1  | -237.0  | -900.4 | -2924.2 | -104.2  | -245.8  |
| c4mpyr-cl-p1   | -37.9 | -22.7 | -1012.8 | -3201.8 | -900.2 | -2923.6 | -96.2   | -256.6  | -900.5 | -2924.1 | -100.0  | -267.2  |
| c4mpyr-cl-p2   | -37.6 | -22.7 | -1012.5 | -3201.9 | -900.0 | -2924.0 | -96.2   | -256.6  | -900.3 | -2924.5 | -99.9   | -267.0  |
| c4mpyr-cl-p3   | -36.5 | -22.2 | -1012.1 | -3201.2 | -900.2 | -2923.8 | -96.2   | -256.6  | -900.4 | -2924.3 | -99.7   | -266.7  |
| c4mpyr-dca-p1  | -41.3 | -30.6 | -1445.7 | -4302.6 | -899.8 | -2922.4 | -527.0  | -1357.8 | -900.3 | -2923.7 | -529.9  | -1363.8 |
| c4mpyr-dca-p2  | -43.2 | -31.4 | -1447.2 | -4303.2 | -899.7 | -2922.8 | -527.1  | -1357.7 | -900.3 | -2924.1 | -530.3  | -1364.4 |
| c4mpyr-dca-p3  | -41.9 | -29.8 | -1446.7 | -4302.2 | -899.8 | -2922.7 | -527.1  | -1357.5 | -900.2 | -2923.8 | -530.5  | -1364.6 |
| c4mpyr-dca-p4  | -42.8 | -31.4 | -1446.7 | -4303.3 | -899.7 | -2922.7 | -527.0  | -1357.7 | -900.3 | -2924.0 | -530.1  | -1364.0 |
| c4mpyr-dca-p5  | -44.2 | -32.3 | -1447.4 | -4304.0 | -899.8 | -2922.7 | -527.0  | -1357.7 | -900.3 | -2924.0 | -530.3  | -1364.5 |
| c4mpyr-mes-p1  | -46.8 | -21.2 | -1522.2 | -4561.2 | -899.6 | -2922.7 | -601.4  | -1613.0 | -900.1 | -2923.8 | -609.4  | -1628.9 |
| c4mpyr-mes-p2  | -43.2 | -19.4 | -1521.2 | -4560.0 | -900.2 | -2923.3 | -601.4  | -1613.1 | -900.7 | -2924.4 | -608.8  | -1627.9 |
| c4mpyr-mes-p3  | -42.3 | -19.5 | -1520.6 | -4559.2 | -899.8 | -2923.3 | -601.4  | -1613.0 | -900.3 | -2924.4 | -608.3  | -1627.2 |
| c4mpyr-ntf2-p1 | -56.7 | -35.4 | -2827.3 | -7787.7 | -899.9 | -2922.4 | -1902.9 | -4833.1 | -900.4 | -2923.6 | -1909.5 | -4846.1 |
| c4mpyr-ntf2-p2 | -47.8 | -26.9 | -2823.4 | -7780.4 | -899.6 | -2922.1 | -1902.7 | -4831.7 | -900.0 | -2923.2 | -1909.1 | -4844.5 |
| c4mpyr-ntf2-p3 | -55.3 | -34.3 | -2826.7 | -7786.7 | -899.6 | -2922.4 | -1902.9 | -4833.2 | -900.1 | -2923.5 | -1909.4 | -4846.1 |
| c4mpyr-ntf2-p4 | -55.5 | -35.0 | -2826.7 | -7786.9 | -899.7 | -2922.4 | -1902.9 | -4833.1 | -900.2 | -2923.5 | -1909.3 | -4845.7 |
| c4mpyr-ntf2-p5 | -45.4 | -25.3 | -2822.2 | -7779.3 | -899.4 | -2922.1 | -1902.7 | -4831.9 | -899.8 | -2923.2 | -1908.9 | -4844.3 |
| c4mpyr-ntf2-p6 | -46.1 | -25.4 | -2822.9 | -7780.1 | -899.8 | -2922.4 | -1902.8 | -4832.0 | -900.2 | -2923.4 | -1909.2 | -4844.8 |
| c4mpyr-pf6-p1  | -39.4 | -17.8 | -1833.7 | -5328.0 | -899.5 | -2922.2 | -917.9  | -2382.7 | -899.9 | -2923.1 | -924.6  | -2396.4 |
| c4mpyr-pf6-p2  | -36.7 | -16.7 | -1832.9 | -5326.7 | -899.8 | -2922.5 | -917.9  | -2382.8 | -900.2 | -2923.3 | -924.1  | -2395.4 |
| c4mpyr-pf6-p3  | -36.5 | -16.7 | -1832.6 | -5326.6 | -899.7 | -2922.4 | -917.9  | -2382.8 | -900.0 | -2923.2 | -924.0  | -2395.3 |
| c4mpyr-tos-p1  | -43.4 | -18.8 | -2086.3 | -6042.7 | -899.6 | -2922.7 | -1166.6 | -3096.8 | -900.1 | -2924.0 | -1174.3 | -3111.9 |
| c4mpyr-tos-p2  | -39.9 | -17.1 | -2085.3 | -6041.5 | -900.2 | -2923.2 | -1166.6 | -3096.9 | -900.7 | -2924.4 | -1173.7 | -3110.9 |



## 2.2.6 JCCD basis set

Table S 7: Raw JCCD energies. Superscript \* indicates monomer calculated in the dimer basis set.

| ion pair       | E(int) | E(int) CP | E(dimer) SS | E(dimer) OS | E(A) SS | E(A) OS | E(B) SS | E(B) OS | E(A) SS* | E(A) OS* | E(B) SS* | E(B) OS* |
|----------------|--------|-----------|-------------|-------------|---------|---------|---------|---------|----------|----------|----------|----------|
| clmim-bf4-p1   | -29.6  | -15.3     | -1315.4     | -3614.1     | -673.5  | -1967.3 | -629.8  | -1629.3 | -675.2   | -1971.9  | -632.1   | -1635.0  |
| clmim-br-p1    | -43.5  | -24.9     | -799.1      | -2246.5     | -676.1  | -1977.5 | -103.6  | -244.9  | -676.6   | -1978.9  | -108.4   | -256.8   |
| clmim-br-p2    | -26.3  | -12.5     | -792.5      | -2236.0     | -675.7  | -1978.0 | -103.6  | -244.9  | -675.9   | -1978.7  | -107.2   | -254.2   |
| clmim-cl-p1    | -36.2  | -17.5     | -791.7      | -2265.5     | -675.9  | -1977.1 | -99.8   | -268.2  | -676.4   | -1978.5  | -104.7   | -280.1   |
| clmim-cl-p2    | -24.2  | -9.5      | -788.3      | -2258.5     | -675.9  | -1978.7 | -99.8   | -268.2  | -676.1   | -1979.4  | -103.7   | -278.1   |
| clmim-dca-p1   | -59.4  | -43.0     | -1242.8     | -3394.2     | -674.1  | -1968.9 | -542.3  | -1392.4 | -675.4   | -1972.5  | -545.5   | -1400.6  |
| clmim-dca-p2   | -41.8  | -29.7     | -1236.0     | -3385.0     | -674.2  | -1970.3 | -542.1  | -1392.6 | -674.9   | -1972.4  | -544.6   | -1399.4  |
| clmim-mes-p1   | -39.8  | -21.1     | -1313.4     | -3642.3     | -674.0  | -1968.3 | -621.0  | -1652.6 | -675.4   | -1972.0  | -625.1   | -1662.0  |
| clmim-ntf2-p1  | -72.6  | -47.5     | -2656.4     | -6943.4     | -673.6  | -1967.5 | -1952.0 | -4934.1 | -676.2   | -1974.9  | -1956.4  | -4944.7  |
| clmim-ntf2-p2  | -40.8  | -23.6     | -2644.2     | -6924.2     | -674.0  | -1969.9 | -1951.3 | -4932.4 | -675.3   | -1973.8  | -1954.8  | -4940.9  |
| clmim-ntf2-p3  | -41.8  | -21.7     | -2644.6     | -6924.2     | -673.6  | -1968.5 | -1951.8 | -4933.0 | -675.7   | -1974.4  | -1955.5  | -4941.5  |
| clmim-pf6-p1   | -33.4  | -16.5     | -1635.7     | -4434.7     | -673.6  | -1967.5 | -948.5  | -2447.4 | -675.3   | -1972.3  | -951.7   | -2454.6  |
| clmim-tos-p1   | -40.2  | -20.6     | -1882.8     | -5135.9     | -673.8  | -1968.0 | -1190.8 | -3146.0 | -675.4   | -1972.5  | -1194.9  | -3155.3  |
| clmpyr-bf4-p1  | -27.5  | -15.8     | -1276.0     | -3704.7     | -634.1  | -2062.0 | -629.4  | -1627.7 | -635.2   | -2064.9  | -631.6   | -1633.2  |
| clmpyr-bf4-p2  | -25.3  | -14.6     | -1275.2     | -3703.7     | -634.3  | -2062.2 | -629.4  | -1627.7 | -635.1   | -2064.5  | -631.6   | -1633.1  |
| clmpyr-br-p1   | -44.3  | -27.5     | -758.6      | -2332.2     | -634.8  | -2063.2 | -103.6  | -244.9  | -635.1   | -2064.1  | -108.1   | -256.0   |
| clmpyr-br-p2   | -41.6  | -25.8     | -757.4      | -2331.0     | -634.8  | -2063.5 | -103.6  | -244.9  | -635.0   | -2064.3  | -107.8   | -255.4   |
| clmpyr-cl-p1   | -39.2  | -22.1     | -752.6      | -2352.8     | -634.8  | -2063.3 | -99.8   | -268.2  | -635.1   | -2064.2  | -104.6   | -279.4   |
| clmpyr-cl-p2   | -37.1  | -21.0     | -751.7      | -2351.8     | -634.8  | -2063.6 | -99.8   | -268.2  | -635.1   | -2064.3  | -104.3   | -278.8   |
| clmpyr-dca-p1  | -40.0  | -28.3     | -1189.3     | -3459.5     | -634.6  | -2062.8 | -535.6  | -1375.7 | -635.4   | -2064.8  | -538.1   | -1382.2  |
| clmpyr-dca-p2  | -44.1  | -31.7     | -1190.5     | -3462.3     | -634.5  | -2062.5 | -535.6  | -1376.2 | -635.2   | -2064.6  | -538.3   | -1383.0  |
| clmpyr-dca-p3  | -40.1  | -29.8     | -1187.4     | -3461.8     | -634.2  | -2062.3 | -535.6  | -1377.0 | -635.0   | -2064.6  | -537.6   | -1382.3  |
| clmpyr-dca-p4  | -43.4  | -30.4     | -1189.8     | -3462.0     | -634.2  | -2062.3 | -535.6  | -1376.2 | -635.1   | -2064.6  | -538.4   | -1383.3  |
| clmpyr-mes-p1  | -34.7  | -18.7     | -1272.5     | -3734.3     | -634.2  | -2062.5 | -621.1  | -1654.3 | -635.1   | -2065.1  | -624.9   | -1663.0  |
| clmpyr-mes-p2  | -30.9  | -15.8     | -1271.0     | -3732.6     | -634.4  | -2063.0 | -621.1  | -1654.3 | -635.1   | -2065.0  | -624.9   | -1662.8  |
| clmpyr-ntf2-p1 | -50.3  | -32.7     | -2607.2     | -7025.1     | -634.4  | -2062.0 | -1951.1 | -4934.5 | -635.9   | -2066.2  | -1954.6  | -4942.9  |
| clmpyr-ntf2-p2 | -37.7  | -21.8     | -2601.9     | -7015.8     | -634.2  | -2061.7 | -1950.9 | -4933.2 | -635.6   | -2065.9  | -1953.9  | -4940.4  |
| clmpyr-ntf2-p3 | -49.2  | -31.5     | -2606.8     | -7024.2     | -634.4  | -2062.2 | -1951.0 | -4934.2 | -635.8   | -2066.1  | -1954.7  | -4942.8  |
| clmpyr-ntf2-p5 | -38.0  | -22.5     | -2602.3     | -7015.8     | -634.3  | -2062.0 | -1950.8 | -4932.9 | -635.8   | -2065.9  | -1953.8  | -4940.1  |
| clmpyr-pf6-p1  | -29.7  | -15.7     | -1595.8     | -4526.3     | -634.1  | -2061.9 | -948.6  | -2447.8 | -635.2   | -2064.9  | -951.6   | -2454.6  |
| clmpyr-pf6-p2  | -27.4  | -14.3     | -1594.9     | -4525.3     | -634.3  | -2062.0 | -948.6  | -2447.9 | -635.2   | -2064.5  | -951.6   | -2454.5  |
| clmpyr-tos-p1  | -33.6  | -17.3     | -1841.1     | -5226.3     | -634.2  | -2062.5 | -1190.2 | -3147.0 | -635.3   | -2065.6  | -1193.9  | -3155.4  |
| clmpyr-tos-p2  | -30.1  | -14.5     | -1839.2     | -5224.9     | -634.3  | -2062.6 | -1190.1 | -3146.9 | -635.2   | -2065.1  | -1193.9  | -3155.3  |



|               |       |       |         |         |        |         |         |         |        |         |         |         |
|---------------|-------|-------|---------|---------|--------|---------|---------|---------|--------|---------|---------|---------|
| c2mim-bf4-p1  | -31.0 | -16.1 | -1406.8 | -3904.8 | -764.1 | -2257.4 | -629.8  | -1629.3 | -765.8 | -2262.0 | -632.2  | -1635.5 |
| c2mim-bf4-p2  | -29.2 | -15.0 | -1405.4 | -3903.2 | -763.6 | -2256.7 | -629.8  | -1629.3 | -765.2 | -2261.1 | -632.1  | -1635.2 |
| c2mim-br-p1   | -45.5 | -25.8 | -889.9  | -2537.5 | -766.1 | -2267.3 | -103.6  | -244.9  | -766.7 | -2268.7 | -108.7  | -257.6  |
| c2mim-br-p2   | -30.2 | -15.0 | -885.4  | -2529.7 | -766.9 | -2269.6 | -103.6  | -244.9  | -767.1 | -2270.4 | -107.6  | -255.0  |
| c2mim-br-p3   | -30.6 | -15.4 | -884.8  | -2529.1 | -766.1 | -2268.7 | -103.6  | -244.9  | -766.3 | -2269.4 | -107.7  | -255.1  |
| c2mim-br-p4   | -45.6 | -26.2 | -890.3  | -2538.2 | -766.5 | -2267.9 | -103.6  | -244.9  | -767.1 | -2269.4 | -108.6  | -257.3  |
| c2mim-cl-p1   | -38.3 | -18.4 | -882.7  | -2556.8 | -766.0 | -2267.1 | -99.8   | -268.2  | -766.5 | -2268.5 | -105.1  | -280.9  |
| c2mim-cl-p2   | -27.0 | -11.2 | -880.7  | -2551.6 | -767.1 | -2270.2 | -99.8   | -268.2  | -767.4 | -2271.1 | -104.0  | -278.7  |
| c2mim-cl-p3   | -27.5 | -11.6 | -880.1  | -2551.1 | -766.3 | -2269.3 | -99.8   | -268.2  | -766.6 | -2270.0 | -104.1  | -278.8  |
| c2mim-cl-p4   | -37.8 | -18.5 | -882.7  | -2557.0 | -766.3 | -2267.5 | -99.8   | -268.2  | -766.8 | -2268.9 | -104.9  | -280.5  |
| c2mim-dca-p1  | -62.4 | -44.9 | -1333.7 | -3685.7 | -763.9 | -2257.9 | -542.3  | -1392.9 | -765.3 | -2261.9 | -545.7  | -1401.7 |
| c2mim-dca-p2  | -58.5 | -41.6 | -1332.5 | -3683.1 | -764.2 | -2258.0 | -542.3  | -1392.7 | -765.5 | -2261.8 | -545.6  | -1401.1 |
| c2mim-dca-p3  | -61.9 | -44.7 | -1334.3 | -3684.9 | -764.3 | -2258.1 | -542.4  | -1392.6 | -765.7 | -2261.9 | -545.7  | -1401.2 |
| c2mim-dca-p4  | -59.2 | -42.4 | -1332.6 | -3683.5 | -764.0 | -2258.0 | -542.3  | -1392.6 | -765.4 | -2261.7 | -545.6  | -1401.1 |
| c2mim-dca-p5  | -60.4 | -43.3 | -1333.2 | -3684.1 | -764.0 | -2258.1 | -542.4  | -1392.4 | -765.4 | -2261.8 | -545.7  | -1401.1 |
| c2mim-dca-p6  | -60.8 | -43.8 | -1333.0 | -3684.5 | -764.0 | -2257.7 | -542.4  | -1392.6 | -765.4 | -2261.5 | -545.7  | -1401.1 |
| c2mim-mes-p1  | -45.0 | -24.9 | -1406.5 | -3935.2 | -764.8 | -2258.5 | -620.9  | -1652.5 | -766.3 | -2262.7 | -625.3  | -1662.4 |
| c2mim-mes-p2  | -41.5 | -21.7 | -1403.8 | -3932.7 | -763.9 | -2257.4 | -621.0  | -1652.7 | -765.3 | -2261.2 | -625.5  | -1662.8 |
| c2mim-ntf2-p1 | -80.0 | -51.7 | -2750.1 | -7237.7 | -764.2 | -2257.6 | -1951.9 | -4934.0 | -767.0 | -2265.6 | -1957.1 | -4946.3 |
| c2mim-ntf2-p2 | -52.1 | -30.8 | -2739.6 | -7221.6 | -764.4 | -2259.6 | -1951.6 | -4933.4 | -766.2 | -2264.5 | -1956.0 | -4943.6 |
| c2mim-ntf2-p3 | -45.1 | -23.6 | -2736.5 | -7215.5 | -764.0 | -2258.3 | -1951.8 | -4932.9 | -766.1 | -2264.2 | -1955.8 | -4942.3 |
| c2mim-ntf2-p4 | -69.8 | -44.1 | -2746.0 | -7231.9 | -763.9 | -2257.5 | -1952.2 | -4934.4 | -766.5 | -2264.6 | -1957.0 | -4945.6 |
| c2mim-pf6-p1  | -36.7 | -18.3 | -1727.6 | -4726.2 | -764.0 | -2257.4 | -948.5  | -2447.3 | -765.9 | -2262.3 | -952.0  | -2455.4 |
| c2mim-pf6-p2  | -34.2 | -16.8 | -1725.9 | -4724.4 | -763.6 | -2256.7 | -948.5  | -2447.4 | -765.4 | -2261.4 | -951.8  | -2455.0 |
| c2mim-tos-p1  | -46.5 | -25.2 | -1976.6 | -5429.4 | -764.7 | -2258.4 | -1190.7 | -3145.8 | -766.6 | -2263.5 | -1195.0 | -3155.7 |
| c2mim-tos-p2  | -41.3 | -21.1 | -1973.5 | -5425.8 | -763.9 | -2257.5 | -1190.7 | -3145.9 | -765.6 | -2262.0 | -1195.0 | -3155.7 |
| c2mpyr-bf4-p1 | -28.9 | -16.3 | -1368.3 | -3997.9 | -726.0 | -2354.3 | -629.4  | -1627.6 | -727.1 | -2357.4 | -631.8  | -1633.6 |
| c2mpyr-bf4-p2 | -27.3 | -15.4 | -1368.1 | -3997.5 | -726.4 | -2354.7 | -629.4  | -1627.7 | -727.6 | -2357.7 | -631.6  | -1633.3 |
| c2mpyr-bf4-p3 | -26.9 | -15.1 | -1367.6 | -3997.0 | -726.1 | -2354.5 | -629.4  | -1627.7 | -727.0 | -2357.1 | -631.8  | -1633.6 |
| c2mpyr-br-p1  | -46.7 | -28.6 | -851.3  | -2625.9 | -726.6 | -2355.5 | -103.6  | -244.9  | -727.0 | -2356.4 | -108.4  | -256.8  |
| c2mpyr-br-p2  | -44.3 | -27.3 | -850.3  | -2625.1 | -726.5 | -2356.1 | -103.6  | -244.9  | -726.8 | -2356.9 | -108.2  | -256.2  |
| c2mpyr-br-p3  | -43.6 | -26.8 | -849.9  | -2624.3 | -726.5 | -2355.6 | -103.6  | -244.9  | -726.8 | -2356.4 | -108.1  | -256.0  |
| c2mpyr-cl-p1  | -41.2 | -22.9 | -845.1  | -2646.3 | -726.7 | -2355.5 | -99.8   | -268.2  | -727.0 | -2356.5 | -104.9  | -280.1  |
| c2mpyr-cl-p2  | -39.2 | -22.1 | -844.1  | -2645.4 | -726.4 | -2355.9 | -99.8   | -268.2  | -726.7 | -2356.7 | -104.6  | -279.4  |
| c2mpyr-cl-p3  | -38.5 | -21.6 | -844.0  | -2644.9 | -726.6 | -2355.7 | -99.8   | -268.2  | -726.9 | -2356.6 | -104.5  | -279.3  |
| c2mpyr-dca-p1 | -41.0 | -28.7 | -1281.4 | -3752.4 | -726.4 | -2355.0 | -535.6  | -1375.8 | -727.3 | -2357.2 | -538.2  | -1382.5 |
| c2mpyr-dca-p2 | -45.4 | -31.7 | -1282.8 | -3755.3 | -726.1 | -2354.7 | -535.7  | -1376.2 | -727.0 | -2357.1 | -538.6  | -1383.7 |
| c2mpyr-dca-p3 | -45.2 | -32.3 | -1282.6 | -3755.3 | -726.2 | -2354.7 | -535.6  | -1376.2 | -727.1 | -2357.0 | -538.4  | -1383.2 |
| c2mpyr-mes-p1 | -37.7 | -19.9 | -1365.3 | -4028.5 | -726.0 | -2354.8 | -621.1  | -1654.3 | -727.1 | -2357.6 | -625.3  | -1663.8 |



|                |       |       |         |         |        |         |         |         |        |         |         |         |
|----------------|-------|-------|---------|---------|--------|---------|---------|---------|--------|---------|---------|---------|
| c2mpyr-mes-p2  | -34.6 | -18.0 | -1364.5 | -4027.5 | -726.6 | -2355.2 | -621.1  | -1654.4 | -727.7 | -2357.9 | -625.1  | -1663.3 |
| c2mpyr-mes-p3  | -34.0 | -17.2 | -1363.9 | -4026.9 | -726.2 | -2355.2 | -621.1  | -1654.3 | -727.0 | -2357.5 | -625.4  | -1663.8 |
| c2mpyr-ntf2-p1 | -52.5 | -33.6 | -2699.9 | -7318.6 | -726.3 | -2354.1 | -1951.2 | -4934.6 | -727.9 | -2358.6 | -1955.0 | -4943.6 |
| c2mpyr-ntf2-p2 | -40.3 | -23.4 | -2694.9 | -7309.7 | -726.0 | -2354.0 | -1951.0 | -4933.4 | -727.6 | -2358.4 | -1954.2 | -4941.1 |
| c2mpyr-ntf2-p3 | -51.4 | -32.5 | -2699.5 | -7317.8 | -726.1 | -2354.2 | -1951.1 | -4934.4 | -727.8 | -2358.7 | -1954.9 | -4943.4 |
| c2mpyr-ntf2-p4 | -50.8 | -32.1 | -2699.1 | -7317.8 | -726.1 | -2354.3 | -1951.1 | -4934.5 | -727.6 | -2358.5 | -1955.0 | -4943.7 |
| c2mpyr-ntf2-p5 | -41.8 | -24.5 | -2695.4 | -7310.5 | -725.9 | -2354.1 | -1950.9 | -4933.2 | -727.6 | -2358.7 | -1954.1 | -4940.9 |
| c2mpyr-ntf2-p6 | -38.8 | -22.8 | -2694.5 | -7309.0 | -726.2 | -2354.3 | -1951.0 | -4933.3 | -727.7 | -2358.4 | -1954.0 | -4940.6 |
| c2mpyr-pf6-p1  | -31.3 | -16.2 | -1688.5 | -4819.7 | -726.2 | -2354.4 | -948.6  | -2447.8 | -727.3 | -2357.6 | -951.9  | -2455.1 |
| c2mpyr-pf6-p2  | -29.2 | -15.2 | -1687.6 | -4818.7 | -726.2 | -2354.4 | -948.6  | -2447.9 | -727.4 | -2357.5 | -951.6  | -2454.7 |
| c2mpyr-pf6-p3  | -28.9 | -14.9 | -1687.3 | -4818.5 | -726.1 | -2354.3 | -948.6  | -2447.9 | -727.1 | -2357.1 | -951.8  | -2455.0 |
| c2mpyr-tos-p1  | -36.8 | -18.8 | -1934.1 | -5520.7 | -726.0 | -2354.7 | -1190.2 | -3147.1 | -727.3 | -2358.1 | -1194.4 | -3156.3 |
| c2mpyr-tos-p2  | -34.4 | -17.0 | -1933.3 | -5520.0 | -726.6 | -2355.1 | -1190.2 | -3147.1 | -727.8 | -2358.4 | -1194.2 | -3156.0 |
| c3mim-bf4-p1   | -32.0 | -16.5 | -1496.4 | -4194.3 | -853.3 | -2546.4 | -629.8  | -1629.3 | -855.0 | -2551.2 | -632.3  | -1635.7 |
| c3mim-bf4-p2   | -31.7 | -16.4 | -1496.1 | -4194.1 | -853.2 | -2546.2 | -629.8  | -1629.3 | -854.9 | -2550.9 | -632.3  | -1635.6 |
| c3mim-br-p1    | -46.6 | -26.3 | -979.6  | -2828.2 | -855.4 | -2557.3 | -103.6  | -244.9  | -856.0 | -2558.7 | -108.8  | -258.0  |
| c3mim-br-p2    | -31.1 | -15.5 | -974.8  | -2819.9 | -855.9 | -2559.3 | -103.6  | -244.9  | -856.2 | -2560.1 | -107.7  | -255.3  |
| c3mim-br-p3    | -34.2 | -18.1 | -975.8  | -2821.0 | -855.4 | -2558.6 | -103.6  | -244.9  | -855.7 | -2559.4 | -107.9  | -255.7  |
| c3mim-br-p4    | -47.5 | -27.0 | -980.0  | -2828.9 | -855.5 | -2557.5 | -103.6  | -244.9  | -856.1 | -2559.0 | -108.8  | -258.0  |
| c3mim-cl-p1    | -39.3 | -18.9 | -972.4  | -2847.2 | -855.2 | -2557.0 | -99.8   | -268.2  | -855.8 | -2558.4 | -105.2  | -281.3  |
| c3mim-cl-p2    | -27.7 | -11.5 | -970.0  | -2841.8 | -856.1 | -2559.9 | -99.8   | -268.2  | -856.4 | -2560.8 | -104.1  | -279.0  |
| c3mim-cl-p3    | -30.2 | -13.4 | -970.5  | -2842.4 | -855.6 | -2559.1 | -99.8   | -268.2  | -855.9 | -2559.9 | -104.4  | -279.3  |
| c3mim-cl-p4    | -39.5 | -19.0 | -972.2  | -2847.6 | -855.3 | -2557.0 | -99.8   | -268.2  | -855.8 | -2558.6 | -105.2  | -281.2  |
| c3mim-dca-p1   | -64.0 | -45.8 | -1423.5 | -3975.5 | -853.0 | -2546.7 | -542.3  | -1393.0 | -854.5 | -2550.8 | -545.8  | -1402.1 |
| c3mim-dca-p2   | -64.4 | -46.4 | -1424.0 | -3976.2 | -853.5 | -2547.4 | -542.3  | -1392.7 | -855.0 | -2551.6 | -545.7  | -1401.5 |
| c3mim-dca-p3   | -52.4 | -37.9 | -1419.9 | -3969.7 | -853.7 | -2548.4 | -542.2  | -1392.9 | -854.6 | -2551.2 | -545.1  | -1400.7 |
| c3mim-dca-p4   | -65.1 | -47.2 | -1424.7 | -3975.6 | -853.3 | -2547.0 | -542.3  | -1392.5 | -854.7 | -2551.0 | -545.8  | -1401.6 |
| c3mim-dca-p5   | -62.4 | -44.7 | -1422.2 | -3974.1 | -852.7 | -2546.2 | -542.2  | -1392.6 | -854.2 | -2550.4 | -545.6  | -1401.3 |
| c3mim-dca-p6   | -61.4 | -44.0 | -1421.9 | -3973.6 | -852.8 | -2546.3 | -542.4  | -1392.6 | -854.3 | -2550.2 | -545.7  | -1401.4 |
| c3mim-mes-p1   | -47.7 | -26.5 | -1497.1 | -4225.9 | -854.0 | -2547.8 | -620.9  | -1652.5 | -855.6 | -2552.1 | -625.6  | -1663.1 |
| c3mim-mes-p2   | -42.5 | -22.1 | -1493.1 | -4222.1 | -852.9 | -2546.1 | -621.0  | -1652.7 | -854.3 | -2550.0 | -625.6  | -1663.1 |
| c3mim-ntf2-p1  | -84.3 | -54.2 | -2841.1 | -7529.2 | -853.3 | -2546.6 | -1952.0 | -4934.1 | -856.3 | -2554.8 | -1957.6 | -4947.3 |
| c3mim-ntf2-p2  | -56.8 | -33.7 | -2830.7 | -7513.0 | -853.5 | -2548.4 | -1951.6 | -4933.3 | -855.4 | -2553.7 | -1956.4 | -4944.5 |
| c3mim-ntf2-p3  | -47.3 | -24.9 | -2826.6 | -7505.8 | -853.1 | -2547.2 | -1951.8 | -4932.9 | -855.3 | -2553.4 | -1956.0 | -4942.9 |
| c3mim-ntf2-p4  | -71.8 | -45.8 | -2835.3 | -7521.8 | -852.8 | -2545.8 | -1952.2 | -4934.6 | -855.4 | -2553.0 | -1957.1 | -4945.9 |
| c3mim-pf6-p1   | -39.2 | -19.9 | -1817.1 | -5016.4 | -852.9 | -2546.0 | -948.4  | -2447.1 | -854.8 | -2551.1 | -952.1  | -2455.6 |
| c3mim-pf6-p2   | -34.7 | -16.9 | -1815.0 | -5013.5 | -852.6 | -2545.4 | -948.5  | -2447.4 | -854.3 | -2550.2 | -951.9  | -2455.2 |
| c3mim-tos-p1   | -50.0 | -27.3 | -2067.3 | -5720.5 | -853.8 | -2547.5 | -1190.7 | -3145.8 | -855.9 | -2552.9 | -1195.3 | -3156.4 |
| c3mim-tos-p2   | -48.4 | -25.8 | -2065.6 | -5718.7 | -853.1 | -2546.3 | -1190.7 | -3145.9 | -854.9 | -2551.4 | -1195.5 | -3156.7 |



|                |       |       |         |         |        |         |         |         |        |         |         |         |
|----------------|-------|-------|---------|---------|--------|---------|---------|---------|--------|---------|---------|---------|
| c3mpyr-bf4-p1  | -29.6 | -16.6 | -1457.8 | -4288.4 | -815.2 | -2644.3 | -629.4  | -1627.6 | -816.4 | -2647.5 | -631.8  | -1633.8 |
| c3mpyr-bf4-p2  | -27.9 | -15.5 | -1457.4 | -4287.8 | -815.5 | -2644.6 | -629.4  | -1627.7 | -816.7 | -2647.6 | -631.7  | -1633.6 |
| c3mpyr-bf4-p3  | -27.7 | -15.4 | -1457.0 | -4287.5 | -815.3 | -2644.5 | -629.4  | -1627.7 | -816.3 | -2647.2 | -631.9  | -1633.8 |
| c3mpyr-br-p1   | -48.0 | -29.4 | -941.1  | -2916.7 | -815.8 | -2645.5 | -103.6  | -244.9  | -816.2 | -2646.5 | -108.5  | -257.1  |
| c3mpyr-br-p2   | -44.6 | -27.3 | -939.4  | -2915.0 | -815.7 | -2645.6 | -103.6  | -244.9  | -816.0 | -2646.5 | -108.2  | -256.3  |
| c3mpyr-br-p3   | -44.9 | -27.5 | -939.6  | -2915.2 | -815.8 | -2645.7 | -103.6  | -244.9  | -816.1 | -2646.5 | -108.2  | -256.4  |
| c3mpyr-cl-p1   | -42.2 | -23.4 | -934.7  | -2937.0 | -815.9 | -2645.6 | -99.8   | -268.2  | -816.3 | -2646.6 | -105.0  | -280.4  |
| c3mpyr-cl-p2   | -40.3 | -22.5 | -933.7  | -2936.0 | -815.7 | -2645.8 | -99.8   | -268.2  | -816.0 | -2646.6 | -104.7  | -279.9  |
| c3mpyr-cl-p3   | -39.4 | -22.0 | -933.5  | -2935.5 | -815.8 | -2645.8 | -99.8   | -268.2  | -816.2 | -2646.6 | -104.6  | -279.6  |
| c3mpyr-dca-p1  | -42.5 | -30.0 | -1371.1 | -4043.3 | -815.5 | -2644.7 | -535.7  | -1376.0 | -816.3 | -2647.0 | -538.3  | -1382.9 |
| c3mpyr-dca-p2  | -45.9 | -31.8 | -1372.2 | -4045.7 | -815.3 | -2644.7 | -535.7  | -1376.2 | -816.2 | -2647.1 | -538.7  | -1383.9 |
| c3mpyr-dca-p3  | -39.9 | -29.2 | -1368.5 | -4044.5 | -815.4 | -2644.7 | -535.8  | -1377.3 | -816.4 | -2647.3 | -537.7  | -1382.5 |
| c3mpyr-dca-p4  | -44.0 | -30.9 | -1371.2 | -4044.9 | -815.6 | -2644.8 | -535.6  | -1376.1 | -816.4 | -2647.2 | -538.3  | -1383.2 |
| c3mpyr-dca-p5  | -45.6 | -32.3 | -1371.9 | -4045.6 | -815.4 | -2644.7 | -535.6  | -1376.2 | -816.3 | -2647.1 | -538.4  | -1383.4 |
| c3mpyr-mes-p1  | -39.0 | -20.7 | -1455.0 | -4319.4 | -815.2 | -2644.7 | -621.1  | -1654.3 | -816.4 | -2647.7 | -625.5  | -1664.1 |
| c3mpyr-mes-p2  | -35.6 | -18.3 | -1454.0 | -4318.1 | -815.8 | -2645.1 | -621.1  | -1654.4 | -816.9 | -2647.9 | -625.3  | -1663.7 |
| c3mpyr-mes-p3  | -35.3 | -17.9 | -1453.6 | -4317.7 | -815.4 | -2645.2 | -621.1  | -1654.3 | -816.4 | -2647.7 | -625.4  | -1664.0 |
| c3mpyr-ntf2-p1 | -55.0 | -35.0 | -2790.3 | -7610.3 | -815.5 | -2644.4 | -1951.2 | -4934.5 | -817.3 | -2649.2 | -1955.1 | -4944.1 |
| c3mpyr-ntf2-p2 | -40.8 | -23.6 | -2784.6 | -7599.8 | -815.3 | -2644.2 | -1950.9 | -4933.2 | -816.9 | -2648.6 | -1954.2 | -4941.1 |
| c3mpyr-ntf2-p3 | -52.3 | -32.9 | -2789.0 | -7608.4 | -815.2 | -2644.2 | -1951.2 | -4934.5 | -816.9 | -2648.8 | -1955.1 | -4943.8 |
| c3mpyr-ntf2-p4 | -53.4 | -33.6 | -2789.4 | -7609.2 | -815.3 | -2644.4 | -1951.1 | -4934.4 | -816.9 | -2648.8 | -1955.2 | -4944.1 |
| c3mpyr-ntf2-p5 | -42.4 | -24.6 | -2784.7 | -7600.8 | -815.1 | -2644.0 | -1950.9 | -4933.1 | -816.8 | -2648.8 | -1954.2 | -4941.1 |
| c3mpyr-ntf2-p6 | -41.0 | -24.1 | -2784.6 | -7600.3 | -815.4 | -2644.3 | -1951.0 | -4933.2 | -816.9 | -2648.7 | -1954.2 | -4941.0 |
| c3mpyr-pf6-p1  | -32.4 | -16.8 | -1777.7 | -5110.3 | -815.1 | -2644.1 | -948.6  | -2447.8 | -816.4 | -2647.5 | -951.9  | -2455.3 |
| c3mpyr-pf6-p2  | -29.9 | -15.3 | -1777.0 | -5109.1 | -815.4 | -2644.3 | -948.6  | -2447.8 | -816.6 | -2647.4 | -951.7  | -2455.0 |
| c3mpyr-pf6-p3  | -29.8 | -15.3 | -1776.8 | -5109.1 | -815.3 | -2644.3 | -948.6  | -2447.9 | -816.3 | -2647.2 | -951.9  | -2455.2 |
| c3mpyr-tos-p1  | -38.7 | -19.7 | -2023.8 | -5811.8 | -815.2 | -2644.7 | -1190.1 | -3146.9 | -816.5 | -2648.2 | -1194.5 | -3156.7 |
| c3mpyr-tos-p2  | -35.5 | -17.4 | -2022.8 | -5810.6 | -815.8 | -2645.0 | -1190.1 | -3147.0 | -817.0 | -2648.4 | -1194.3 | -3156.4 |
| c4mim-bf4-p1   | -32.8 | -16.9 | -1585.7 | -4483.7 | -942.2 | -2835.3 | -629.8  | -1629.3 | -944.0 | -2840.1 | -632.4  | -1635.9 |
| c4mim-bf4-p2   | -32.1 | -16.6 | -1585.1 | -4483.1 | -942.1 | -2834.9 | -629.8  | -1629.3 | -943.8 | -2839.7 | -632.4  | -1635.7 |
| c4mim-br-p1    | -47.8 | -27.0 | -1069.1 | -3118.7 | -944.4 | -2847.1 | -103.6  | -244.9  | -944.9 | -2848.6 | -109.0  | -258.3  |
| c4mim-br-p2    | -32.3 | -16.2 | -1064.3 | -3110.5 | -944.9 | -2849.1 | -103.6  | -244.9  | -945.2 | -2850.0 | -107.8  | -255.6  |
| c4mim-br-p3    | -36.2 | -19.4 | -1065.6 | -3111.9 | -944.5 | -2848.4 | -103.6  | -244.9  | -944.7 | -2849.2 | -108.1  | -256.1  |
| c4mim-br-p4    | -48.4 | -27.5 | -1069.2 | -3119.0 | -944.4 | -2847.0 | -103.6  | -244.9  | -945.0 | -2848.6 | -108.9  | -258.2  |
| c4mim-cl-p1    | -40.2 | -19.4 | -1061.7 | -3137.5 | -944.2 | -2846.8 | -99.8   | -268.2  | -944.8 | -2848.2 | -105.3  | -281.5  |
| c4mim-cl-p2    | -28.6 | -11.9 | -1059.3 | -3132.2 | -945.2 | -2849.7 | -99.8   | -268.2  | -945.5 | -2850.6 | -104.2  | -279.2  |
| c4mim-cl-p3    | -31.7 | -14.3 | -1060.2 | -3133.1 | -944.6 | -2848.9 | -99.8   | -268.2  | -944.9 | -2849.7 | -104.5  | -279.7  |
| c4mim-cl-p4    | -40.3 | -19.4 | -1061.4 | -3137.6 | -944.2 | -2846.6 | -99.8   | -268.2  | -944.8 | -2848.2 | -105.3  | -281.5  |
| c4mim-dca-p1   | -65.1 | -46.5 | -1512.9 | -4265.1 | -942.0 | -2835.6 | -542.3  | -1393.0 | -943.5 | -2839.8 | -545.9  | -1402.3 |



|                |       |       |         |         |        |         |         |         |        |         |         |         |
|----------------|-------|-------|---------|---------|--------|---------|---------|---------|--------|---------|---------|---------|
| c4mim-dca-p2   | -67.1 | -48.6 | -1514.5 | -4265.7 | -942.3 | -2835.9 | -542.3  | -1392.6 | -943.8 | -2840.0 | -545.9  | -1401.9 |
| c4mim-dca-p3   | -63.1 | -45.1 | -1511.3 | -4263.4 | -941.6 | -2835.0 | -542.2  | -1392.7 | -943.2 | -2839.2 | -545.6  | -1401.5 |
| c4mim-mes-p1   | -49.2 | -27.4 | -1586.6 | -4515.6 | -942.9 | -2836.6 | -620.9  | -1652.5 | -944.6 | -2841.1 | -625.7  | -1663.5 |
| c4mim-mes-p2   | -43.0 | -22.2 | -1582.1 | -4511.1 | -941.7 | -2834.7 | -621.0  | -1652.7 | -943.1 | -2838.7 | -625.7  | -1663.4 |
| c4mim-pf6-p1   | -40.0 | -19.9 | -1907.2 | -5306.1 | -942.2 | -2835.4 | -948.5  | -2447.3 | -944.1 | -2840.7 | -952.4  | -2456.3 |
| c4mim-pf6-p2   | -35.2 | -17.0 | -1904.0 | -5302.6 | -941.4 | -2834.1 | -948.5  | -2447.4 | -943.2 | -2838.9 | -952.0  | -2455.5 |
| c4mim-tos-p1   | -52.6 | -28.9 | -2157.5 | -6011.0 | -942.8 | -2836.5 | -1190.7 | -3145.8 | -944.9 | -2842.2 | -1195.5 | -3156.9 |
| c4mim-tos-p2   | -48.8 | -26.7 | -2155.6 | -6008.4 | -942.7 | -2836.1 | -1190.7 | -3145.8 | -944.6 | -2841.2 | -1195.3 | -3156.2 |
| c4mpyr-bf4-p1  | -29.9 | -16.7 | -1546.8 | -4578.0 | -904.1 | -2933.7 | -629.4  | -1627.7 | -905.3 | -2936.9 | -631.9  | -1633.9 |
| c4mpyr-bf4-p2  | -28.4 | -15.7 | -1546.4 | -4577.6 | -904.5 | -2934.0 | -629.4  | -1627.7 | -905.6 | -2937.1 | -631.8  | -1633.7 |
| c4mpyr-bf4-p3  | -28.1 | -15.6 | -1546.1 | -4577.3 | -904.3 | -2934.0 | -629.4  | -1627.7 | -905.3 | -2936.7 | -631.9  | -1633.9 |
| c4mpyr-br-p1   | -48.5 | -29.7 | -1030.2 | -3206.5 | -904.8 | -2934.9 | -103.6  | -244.9  | -905.2 | -2935.9 | -108.6  | -257.3  |
| c4mpyr-br-p2   | -45.4 | -27.7 | -1028.6 | -3205.0 | -904.6 | -2935.1 | -103.6  | -244.9  | -905.0 | -2936.0 | -108.3  | -256.6  |
| c4mpyr-br-p3   | -45.5 | -27.8 | -1028.8 | -3205.0 | -904.7 | -2935.1 | -103.6  | -244.9  | -905.1 | -2936.0 | -108.3  | -256.6  |
| c4mpyr-cl-p1   | -42.5 | -23.5 | -1023.7 | -3226.5 | -904.8 | -2934.9 | -99.8   | -268.2  | -905.2 | -2936.0 | -105.1  | -280.6  |
| c4mpyr-cl-p2   | -41.4 | -23.0 | -1023.1 | -3226.3 | -904.6 | -2935.4 | -99.8   | -268.2  | -904.9 | -2936.3 | -104.9  | -280.3  |
| c4mpyr-cl-p3   | -39.7 | -22.1 | -1022.5 | -3225.1 | -904.8 | -2935.2 | -99.8   | -268.2  | -905.1 | -2936.0 | -104.6  | -279.7  |
| c4mpyr-dca-p1  | -45.1 | -31.0 | -1459.9 | -4335.2 | -904.3 | -2933.7 | -535.6  | -1376.4 | -905.3 | -2936.4 | -538.6  | -1383.9 |
| c4mpyr-dca-p2  | -46.3 | -32.0 | -1461.2 | -4335.4 | -904.3 | -2934.2 | -535.7  | -1376.2 | -905.2 | -2936.7 | -538.8  | -1384.1 |
| c4mpyr-dca-p3  | -43.6 | -30.6 | -1460.3 | -4333.4 | -904.3 | -2934.1 | -535.7  | -1376.0 | -905.2 | -2936.4 | -538.4  | -1383.1 |
| c4mpyr-dca-p4  | -46.3 | -31.5 | -1460.8 | -4335.8 | -904.3 | -2934.1 | -535.6  | -1376.2 | -905.3 | -2936.9 | -538.8  | -1384.1 |
| c4mpyr-dca-p5  | -46.0 | -32.5 | -1461.0 | -4335.3 | -904.3 | -2934.1 | -535.6  | -1376.2 | -905.2 | -2936.6 | -538.5  | -1383.5 |
| c4mpyr-mes-p1  | -39.4 | -20.8 | -1544.0 | -4609.0 | -904.2 | -2934.1 | -621.1  | -1654.3 | -905.3 | -2937.1 | -625.5  | -1664.2 |
| c4mpyr-mes-p2  | -36.4 | -18.7 | -1543.1 | -4608.1 | -904.7 | -2934.6 | -621.1  | -1654.4 | -905.8 | -2937.5 | -625.3  | -1663.9 |
| c4mpyr-mes-p3  | -35.8 | -18.1 | -1542.8 | -4607.5 | -904.4 | -2934.7 | -621.1  | -1654.3 | -905.3 | -2937.2 | -625.5  | -1664.1 |
| c4mpyr-ntf2-p1 | -55.6 | -35.2 | -2879.3 | -7900.0 | -904.4 | -2933.7 | -1951.1 | -4934.4 | -906.2 | -2938.6 | -1955.2 | -4944.1 |
| c4mpyr-ntf2-p2 | -47.3 | -27.2 | -2875.6 | -7892.9 | -904.1 | -2933.4 | -1950.8 | -4932.9 | -906.1 | -2938.8 | -1954.6 | -4941.8 |
| c4mpyr-ntf2-p3 | -54.2 | -33.9 | -2878.8 | -7899.1 | -904.2 | -2933.8 | -1951.2 | -4934.5 | -905.9 | -2938.5 | -1955.3 | -4944.3 |
| c4mpyr-ntf2-p4 | -55.0 | -34.5 | -2879.0 | -7899.6 | -904.3 | -2933.8 | -1951.1 | -4934.4 | -905.9 | -2938.4 | -1955.3 | -4944.4 |
| c4mpyr-ntf2-p5 | -43.5 | -25.2 | -2874.0 | -7891.0 | -904.0 | -2933.5 | -1950.9 | -4933.1 | -905.8 | -2938.4 | -1954.3 | -4941.3 |
| c4mpyr-ntf2-p6 | -43.1 | -25.2 | -2874.3 | -7890.9 | -904.3 | -2933.7 | -1950.9 | -4933.1 | -906.0 | -2938.4 | -1954.3 | -4941.3 |
| c4mpyr-pf6-p1  | -32.8 | -16.9 | -1866.8 | -5400.0 | -904.1 | -2933.6 | -948.6  | -2447.8 | -905.4 | -2937.0 | -952.0  | -2455.5 |
| c4mpyr-pf6-p2  | -30.6 | -15.6 | -1866.1 | -5399.0 | -904.3 | -2933.8 | -948.6  | -2447.8 | -905.5 | -2937.0 | -951.8  | -2455.2 |
| c4mpyr-pf6-p3  | -30.3 | -15.4 | -1865.9 | -5398.9 | -904.2 | -2933.8 | -948.6  | -2447.9 | -905.3 | -2936.7 | -951.9  | -2455.4 |
| c4mpyr-tos-p1  | -39.3 | -20.0 | -2113.1 | -6101.8 | -904.2 | -2934.2 | -1190.2 | -3147.0 | -905.6 | -2937.8 | -1194.6 | -3157.0 |
| c4mpyr-tos-p2  | -36.7 | -18.0 | -2112.3 | -6101.1 | -904.7 | -2934.5 | -1190.3 | -3147.2 | -906.0 | -2938.0 | -1194.6 | -3156.9 |



### 2.2.7 ACCD basis set

Table S 8: Raw ACCD energies. Superscript \* indicates monomer calculated in the dimer basis set.

| ion pair       | E(int) | E(int) CP | E(dimer) SS | E(dimer) OS | E(A) SS | E(A) OS | E(B) SS | E(B) OS | E(A) SS* | E(A) OS* | E(B) SS* | E(B) OS* |
|----------------|--------|-----------|-------------|-------------|---------|---------|---------|---------|----------|----------|----------|----------|
| c1mim-bf4-p1   | -38.5  | -26.5     | -1384.3     | -3793.0     | -695.3  | -2030.6 | -673.1  | -1739.7 | -696.3   | -2034.6  | -674.5   | -1745.4  |
| c1mim-br-p1    | -54.2  | -35.8     | -835.8      | -2344.6     | -697.8  | -2040.6 | -114.2  | -273.7  | -698.2   | -2042.4  | -118.4   | -285.6   |
| c1mim-br-p2    | -33.6  | -18.5     | -827.9      | -2332.9     | -697.7  | -2041.6 | -114.2  | -273.7  | -698.0   | -2042.6  | -117.7   | -284.0   |
| c1mim-cl-p1    | -40.6  | -29.0     | -829.4      | -2366.8     | -697.6  | -2040.3 | -113.6  | -304.1  | -698.1   | -2042.2  | -115.2   | -311.6   |
| c1mim-cl-p2    | -24.8  | -15.7     | -824.7      | -2358.2     | -698.0  | -2042.3 | -113.6  | -304.1  | -698.3   | -2043.3  | -114.9   | -310.6   |
| c1mim-dca-p1   | -69.1  | -54.0     | -1284.4     | -3514.3     | -695.9  | -2032.2 | -558.5  | -1443.1 | -697.0   | -2036.8  | -560.3   | -1450.5  |
| c1mim-dca-p2   | -49.2  | -36.5     | -1276.5     | -3504.1     | -696.1  | -2033.8 | -558.2  | -1443.2 | -696.9   | -2037.0  | -559.9   | -1450.3  |
| c1mim-mes-p1   | -51.7  | -35.5     | -1379.1     | -3811.4     | -695.7  | -2031.5 | -660.5  | -1751.1 | -696.9   | -2036.0  | -662.6   | -1759.5  |
| c1mim-ntf2-p1  | -87.7  | -62.7     | -2803.6     | -7306.3     | -695.3  | -2030.8 | -2072.0 | -5224.0 | -697.1   | -2038.0  | -2075.5  | -5236.5  |
| c1mim-ntf2-p2  | -49.0  | -30.8     | -2788.4     | -7283.2     | -695.9  | -2033.4 | -2071.2 | -5222.2 | -696.8   | -2037.3  | -2074.1  | -5232.6  |
| c1mim-ntf2-p3  | -54.2  | -34.6     | -2790.9     | -7285.8     | -695.5  | -2031.9 | -2072.0 | -5223.1 | -696.8   | -2037.3  | -2074.7  | -5233.3  |
| c1mim-pf6-p1   | -42.1  | -28.8     | -1739.0     | -4685.6     | -695.3  | -2030.8 | -1026.3 | -2630.1 | -696.3   | -2034.8  | -1028.0  | -2636.6  |
| c1mim-tos-p1   | -51.9  | -34.4     | -1962.9     | -5349.2     | -695.4  | -2031.2 | -1244.9 | -3288.7 | -696.8   | -2036.3  | -1247.3  | -3297.4  |
| c1mpyr-bf4-p1  | -37.1  | -25.4     | -1346.3     | -3890.0     | -657.7  | -2131.0 | -672.6  | -1737.8 | -658.5   | -2134.4  | -674.0   | -1743.9  |
| c1mpyr-bf4-p2  | -33.5  | -22.9     | -1344.8     | -3888.2     | -657.8  | -2131.3 | -672.6  | -1737.8 | -658.5   | -2134.1  | -673.9   | -1743.6  |
| c1mpyr-br-p1   | -53.9  | -35.7     | -796.3      | -2436.2     | -658.4  | -2132.3 | -114.2  | -273.7  | -658.7   | -2133.6  | -118.5   | -286.0   |
| c1mpyr-br-p2   | -50.3  | -33.4     | -794.9      | -2434.4     | -658.4  | -2132.7 | -114.2  | -273.7  | -658.7   | -2133.7  | -118.2   | -285.2   |
| c1mpyr-cl-p1   | -41.7  | -30.8     | -790.9      | -2459.3     | -658.4  | -2132.4 | -113.6  | -304.1  | -658.7   | -2133.7  | -115.2   | -311.8   |
| c1mpyr-cl-p2   | -39.4  | -29.4     | -790.1      | -2458.2     | -658.4  | -2132.7 | -113.6  | -304.1  | -658.7   | -2133.8  | -115.1   | -311.3   |
| c1mpyr-dca-p1  | -47.8  | -36.0     | -1231.6     | -3584.5     | -658.2  | -2131.9 | -551.7  | -1426.4 | -659.1   | -2135.2  | -553.2   | -1432.7  |
| c1mpyr-dca-p2  | -52.8  | -39.5     | -1232.9     | -3588.1     | -658.0  | -2131.6 | -551.7  | -1426.8 | -658.9   | -2135.0  | -553.5   | -1434.1  |
| c1mpyr-dca-p3  | -50.0  | -37.1     | -1230.5     | -3588.3     | -657.8  | -2131.4 | -551.9  | -1427.8 | -658.7   | -2134.8  | -553.6   | -1434.7  |
| c1mpyr-dca-p4  | -51.1  | -37.8     | -1231.9     | -3586.9     | -657.8  | -2131.4 | -551.7  | -1426.8 | -658.7   | -2134.8  | -553.5   | -1434.0  |
| c1mpyr-mes-p1  | -46.5  | -30.5     | -1339.5     | -3909.8     | -657.7  | -2131.5 | -660.7  | -1752.9 | -658.7   | -2135.2  | -663.0   | -1761.9  |
| c1mpyr-mes-p2  | -40.1  | -25.7     | -1337.0     | -3906.6     | -658.0  | -2132.1 | -660.7  | -1752.9 | -658.7   | -2135.2  | -662.8   | -1761.3  |
| c1mpyr-ntf2-p1 | -61.9  | -41.9     | -2754.1     | -7391.7     | -658.0  | -2131.0 | -2070.8 | -5224.1 | -659.2   | -2135.8  | -2073.9  | -5235.0  |
| c1mpyr-ntf2-p2 | -49.4  | -31.3     | -2749.0     | -7382.6     | -657.7  | -2130.8 | -2070.7 | -5222.9 | -658.9   | -2135.2  | -2073.4  | -5232.8  |
| c1mpyr-ntf2-p3 | -59.4  | -40.1     | -2753.2     | -7390.0     | -658.0  | -2131.3 | -2070.7 | -5223.8 | -659.1   | -2135.7  | -2073.7  | -5234.6  |
| c1mpyr-ntf2-p5 | -50.0  | -32.3     | -2749.5     | -7382.7     | -657.9  | -2131.1 | -2070.5 | -5222.6 | -659.0   | -2135.2  | -2073.2  | -5232.4  |
| c1mpyr-pf6-p1  | -38.7  | -26.0     | -1700.5     | -4783.8     | -657.7  | -2131.0 | -1026.5 | -2630.5 | -658.5   | -2134.2  | -1028.2  | -2637.4  |
| c1mpyr-pf6-p2  | -35.1  | -23.5     | -1699.1     | -4782.1     | -657.8  | -2131.1 | -1026.5 | -2630.6 | -658.5   | -2133.9  | -1028.2  | -2637.1  |
| c1mpyr-tos-p1  | -46.2  | -29.0     | -1923.2     | -5447.2     | -657.7  | -2131.5 | -1244.7 | -3290.2 | -658.8   | -2135.7  | -1247.2  | -3299.7  |
| c1mpyr-tos-p2  | -39.9  | -24.5     | -1920.3     | -5444.0     | -657.9  | -2131.7 | -1244.7 | -3290.2 | -658.7   | -2135.2  | -1247.0  | -3298.9  |



|               |       |       |         |         |        |         |         |         |        |         |         |         |
|---------------|-------|-------|---------|---------|--------|---------|---------|---------|--------|---------|---------|---------|
| c2mim-bf4-p1  | -41.1 | -27.9 | -1479.3 | -4094.3 | -789.1 | -2330.7 | -673.1  | -1739.7 | -790.2 | -2334.9 | -674.6  | -1746.0 |
| c2mim-bf4-p2  | -38.4 | -26.0 | -1477.6 | -4092.4 | -788.7 | -2330.1 | -673.1  | -1739.7 | -789.8 | -2334.2 | -674.5  | -1745.6 |
| c2mim-br-p1   | -56.2 | -36.8 | -930.0  | -2645.9 | -791.2 | -2340.6 | -114.2  | -273.7  | -791.7 | -2342.3 | -118.7  | -286.4  |
| c2mim-br-p2   | -39.2 | -22.0 | -924.7  | -2637.9 | -792.3 | -2343.3 | -114.2  | -273.7  | -792.6 | -2344.4 | -118.2  | -285.4  |
| c2mim-br-p3   | -39.0 | -22.5 | -924.0  | -2636.7 | -791.6 | -2342.4 | -114.2  | -273.7  | -791.9 | -2343.5 | -118.1  | -284.8  |
| c2mim-br-p4   | -56.3 | -37.2 | -930.6  | -2646.7 | -791.7 | -2341.4 | -114.2  | -273.7  | -792.2 | -2343.2 | -118.6  | -286.0  |
| c2mim-cl-p1   | -42.4 | -30.3 | -923.7  | -2668.1 | -791.2 | -2340.5 | -113.6  | -304.1  | -791.7 | -2342.3 | -115.3  | -312.2  |
| c2mim-cl-p2   | -28.5 | -18.3 | -920.7  | -2662.1 | -792.5 | -2344.0 | -113.6  | -304.1  | -792.8 | -2345.1 | -115.1  | -311.4  |
| c2mim-cl-p3   | -28.9 | -19.1 | -920.1  | -2661.3 | -791.8 | -2343.0 | -113.6  | -304.1  | -792.1 | -2344.1 | -115.0  | -311.1  |
| c2mim-cl-p4   | -42.1 | -30.1 | -923.8  | -2668.5 | -791.5 | -2341.0 | -113.6  | -304.1  | -792.0 | -2342.9 | -115.3  | -311.9  |
| c2mim-dca-p1  | -71.7 | -55.1 | -1378.4 | -3815.7 | -789.1 | -2331.4 | -558.4  | -1443.5 | -790.4 | -2336.4 | -560.4  | -1451.8 |
| c2mim-dca-p2  | -67.0 | -51.6 | -1376.9 | -3812.5 | -789.3 | -2331.4 | -558.5  | -1443.3 | -790.4 | -2335.9 | -560.3  | -1451.1 |
| c2mim-dca-p3  | -71.7 | -55.5 | -1379.3 | -3815.7 | -789.7 | -2331.8 | -558.6  | -1443.2 | -790.9 | -2336.6 | -560.5  | -1451.4 |
| c2mim-dca-p4  | -68.3 | -52.7 | -1377.2 | -3813.3 | -789.2 | -2331.3 | -558.5  | -1443.2 | -790.4 | -2336.1 | -560.3  | -1451.0 |
| c2mim-dca-p5  | -70.1 | -54.2 | -1378.0 | -3814.4 | -789.2 | -2331.5 | -558.6  | -1443.1 | -790.5 | -2336.4 | -560.4  | -1451.0 |
| c2mim-dca-p6  | -70.3 | -54.6 | -1377.7 | -3814.4 | -789.0 | -2330.9 | -558.6  | -1443.2 | -790.3 | -2335.9 | -560.4  | -1450.9 |
| c2mim-mes-p1  | -58.2 | -40.3 | -1475.9 | -4115.4 | -789.9 | -2331.9 | -660.4  | -1751.0 | -791.1 | -2336.7 | -662.9  | -1760.4 |
| c2mim-mes-p2  | -53.2 | -36.1 | -1472.8 | -4111.8 | -789.1 | -2330.7 | -660.5  | -1751.2 | -790.3 | -2335.5 | -662.8  | -1760.0 |
| c2mim-ntf2-p1 | -96.6 | -68.1 | -2901.0 | -7611.7 | -789.2 | -2330.9 | -2072.0 | -5224.0 | -791.2 | -2338.7 | -2076.1 | -5238.6 |
| c2mim-ntf2-p2 | -61.9 | -40.2 | -2887.7 | -7591.8 | -789.7 | -2333.1 | -2071.6 | -5223.2 | -790.8 | -2338.0 | -2075.0 | -5235.5 |
| c2mim-ntf2-p3 | -58.6 | -37.2 | -2886.5 | -7587.9 | -789.1 | -2331.7 | -2072.0 | -5223.0 | -790.5 | -2337.3 | -2075.0 | -5234.3 |
| c2mim-ntf2-p4 | -84.6 | -59.4 | -2896.6 | -7604.8 | -789.2 | -2331.0 | -2072.3 | -5224.3 | -791.0 | -2338.0 | -2075.9 | -5237.1 |
| c2mim-pf6-p1  | -46.8 | -31.8 | -1834.7 | -4988.1 | -789.0 | -2330.7 | -1026.3 | -2630.0 | -790.2 | -2335.1 | -1028.3 | -2637.6 |
| c2mim-pf6-p2  | -43.1 | -29.1 | -1832.5 | -4985.6 | -788.7 | -2330.0 | -1026.3 | -2630.1 | -789.8 | -2334.3 | -1028.1 | -2636.9 |
| c2mim-tos-p1  | -60.2 | -40.4 | -2060.8 | -5654.2 | -789.7 | -2331.7 | -1244.9 | -3288.5 | -791.1 | -2337.2 | -1247.6 | -3298.6 |
| c2mim-tos-p2  | -53.9 | -35.2 | -2057.3 | -5650.0 | -789.1 | -2330.8 | -1244.9 | -3288.7 | -790.4 | -2336.2 | -1247.4 | -3298.1 |
| c2mpyr-bf4-p1 | -38.6 | -26.0 | -1442.5 | -4194.6 | -753.5 | -2434.6 | -672.6  | -1737.8 | -754.4 | -2438.3 | -674.1  | -1744.3 |
| c2mpyr-bf4-p2 | -35.6 | -24.2 | -1441.8 | -4193.3 | -753.9 | -2435.1 | -672.6  | -1737.9 | -754.7 | -2438.3 | -674.0  | -1743.9 |
| c2mpyr-bf4-p3 | -35.0 | -23.6 | -1441.1 | -4192.8 | -753.6 | -2434.9 | -672.6  | -1737.8 | -754.3 | -2438.0 | -674.0  | -1743.9 |
| c2mpyr-br-p1  | -56.1 | -36.8 | -892.8  | -2741.0 | -754.1 | -2435.8 | -114.2  | -273.7  | -754.5 | -2437.2 | -118.7  | -286.7  |
| c2mpyr-br-p2  | -53.9 | -35.2 | -891.9  | -2740.4 | -754.1 | -2436.5 | -114.2  | -273.7  | -754.4 | -2437.7 | -118.6  | -286.5  |
| c2mpyr-br-p3  | -52.5 | -34.4 | -891.2  | -2739.1 | -754.0 | -2436.0 | -114.2  | -273.7  | -754.3 | -2437.1 | -118.4  | -286.0  |
| c2mpyr-cl-p1  | -43.2 | -31.6 | -887.1  | -2763.8 | -754.2 | -2435.8 | -113.6  | -304.1  | -754.5 | -2437.3 | -115.3  | -312.2  |
| c2mpyr-cl-p2  | -41.5 | -30.5 | -886.3  | -2763.1 | -753.9 | -2436.3 | -113.6  | -304.1  | -754.3 | -2437.5 | -115.3  | -311.9  |
| c2mpyr-cl-p3  | -40.6 | -29.9 | -886.1  | -2762.5 | -754.2 | -2436.1 | -113.6  | -304.1  | -754.5 | -2437.3 | -115.2  | -311.7  |
| c2mpyr-dca-p1 | -48.8 | -36.2 | -1327.5 | -3888.7 | -753.9 | -2435.3 | -551.7  | -1426.4 | -754.9 | -2438.8 | -553.3  | -1433.1 |
| c2mpyr-dca-p2 | -53.1 | -39.4 | -1328.8 | -3891.7 | -753.6 | -2435.1 | -551.8  | -1426.8 | -754.5 | -2438.7 | -553.5  | -1434.3 |
| c2mpyr-dca-p3 | -54.1 | -40.0 | -1328.9 | -3892.4 | -753.7 | -2435.0 | -551.7  | -1426.8 | -754.6 | -2438.7 | -553.6  | -1434.4 |
| c2mpyr-mes-p1 | -49.2 | -31.8 | -1436.1 | -4215.2 | -753.5 | -2435.1 | -660.7  | -1752.9 | -754.6 | -2439.2 | -663.1  | -1762.5 |



|                |        |       |         |         |        |         |         |         |        |         |         |         |
|----------------|--------|-------|---------|---------|--------|---------|---------|---------|--------|---------|---------|---------|
| c2mpyr-mes-p2  | -44.9  | -29.0 | -1434.8 | -4213.4 | -754.1 | -2435.5 | -660.7  | -1753.0 | -755.0 | -2439.2 | -663.0  | -1762.0 |
| c2mpyr-mes-p3  | -42.9  | -27.2 | -1433.6 | -4212.1 | -753.7 | -2435.6 | -660.7  | -1752.9 | -754.6 | -2439.1 | -662.9  | -1761.9 |
| c2mpyr-ntf2-p1 | -65.1  | -43.3 | -2851.1 | -7697.2 | -753.7 | -2434.3 | -2071.0 | -5224.2 | -755.1 | -2439.7 | -2074.3 | -5235.9 |
| c2mpyr-ntf2-p2 | -52.9  | -33.2 | -2846.1 | -7688.4 | -753.4 | -2434.3 | -2070.7 | -5223.1 | -754.7 | -2439.3 | -2073.6 | -5233.7 |
| c2mpyr-ntf2-p3 | -62.8  | -41.9 | -2850.1 | -7695.7 | -753.6 | -2434.6 | -2070.9 | -5224.0 | -754.8 | -2439.5 | -2074.1 | -5235.5 |
| c2mpyr-ntf2-p4 | -61.3  | -40.8 | -2849.5 | -7695.0 | -753.6 | -2434.6 | -2070.9 | -5224.1 | -754.8 | -2439.3 | -2074.1 | -5235.4 |
| c2mpyr-ntf2-p5 | -54.1  | -34.8 | -2846.4 | -7688.8 | -753.3 | -2434.3 | -2070.6 | -5222.9 | -754.5 | -2439.0 | -2073.5 | -5233.5 |
| c2mpyr-ntf2-p6 | -50.7  | -32.6 | -2845.6 | -7687.2 | -753.6 | -2434.6 | -2070.7 | -5223.0 | -754.7 | -2439.0 | -2073.4 | -5233.0 |
| c2mpyr-pf6-p1  | -39.8  | -26.4 | -1796.9 | -5088.3 | -753.6 | -2434.7 | -1026.5 | -2630.5 | -754.6 | -2438.2 | -1028.3 | -2637.7 |
| c2mpyr-pf6-p2  | -37.3  | -24.8 | -1795.9 | -5087.0 | -753.7 | -2434.7 | -1026.5 | -2630.6 | -754.5 | -2437.9 | -1028.2 | -2637.4 |
| c2mpyr-pf6-p3  | -36.7  | -24.1 | -1795.4 | -5086.6 | -753.5 | -2434.6 | -1026.5 | -2630.6 | -754.3 | -2437.8 | -1028.3 | -2637.5 |
| c2mpyr-tos-p1  | -49.2  | -30.4 | -2019.9 | -5752.7 | -753.5 | -2435.0 | -1244.7 | -3290.2 | -754.7 | -2439.7 | -1247.4 | -3300.4 |
| c2mpyr-tos-p2  | -45.0  | -27.7 | -2018.5 | -5750.9 | -754.1 | -2435.4 | -1244.7 | -3290.3 | -755.1 | -2439.6 | -1247.2 | -3299.8 |
| c3mim-bf4-p1   | -42.4  | -28.6 | -1572.3 | -4394.2 | -881.6 | -2629.7 | -673.1  | -1739.7 | -882.7 | -2634.1 | -674.7  | -1746.3 |
| c3mim-bf4-p2   | -41.4  | -28.1 | -1571.8 | -4393.5 | -881.5 | -2629.5 | -673.1  | -1739.7 | -882.6 | -2633.8 | -674.6  | -1746.1 |
| c3mim-br-p1    | -57.6  | -37.4 | -1023.1 | -2946.6 | -883.8 | -2640.5 | -114.2  | -273.7  | -884.3 | -2642.3 | -118.9  | -286.8  |
| c3mim-br-p2    | -40.3  | -22.5 | -1017.4 | -2938.3 | -884.6 | -2643.0 | -114.2  | -273.7  | -884.9 | -2644.2 | -118.3  | -285.8  |
| c3mim-br-p3    | -44.5  | -26.5 | -1019.0 | -2939.8 | -884.3 | -2642.3 | -114.2  | -273.7  | -884.6 | -2643.5 | -118.5  | -285.9  |
| c3mim-br-p4    | -59.2  | -38.6 | -1023.8 | -2947.9 | -883.9 | -2640.8 | -114.2  | -273.7  | -884.5 | -2642.8 | -118.9  | -287.0  |
| c3mim-cl-p1    | -43.3  | -30.8 | -1016.5 | -2968.5 | -883.7 | -2640.3 | -113.6  | -304.1  | -884.2 | -2642.2 | -115.4  | -312.4  |
| c3mim-cl-p2    | -29.1  | -18.5 | -1013.2 | -2962.2 | -884.9 | -2643.7 | -113.6  | -304.1  | -885.2 | -2644.9 | -115.2  | -311.6  |
| c3mim-cl-p3    | -32.8  | -22.2 | -1014.4 | -2963.4 | -884.5 | -2642.8 | -113.6  | -304.1  | -884.8 | -2644.0 | -115.2  | -311.6  |
| c3mim-cl-p4    | -44.0  | -31.1 | -1016.7 | -2969.1 | -883.7 | -2640.4 | -113.6  | -304.1  | -884.3 | -2642.5 | -115.4  | -312.5  |
| c3mim-dca-p1   | -73.5  | -56.1 | -1471.5 | -4115.7 | -881.5 | -2630.1 | -558.4  | -1443.5 | -882.9 | -2635.4 | -560.5  | -1452.3 |
| c3mim-dca-p2   | -74.7  | -57.4 | -1472.4 | -4117.0 | -882.0 | -2630.8 | -558.5  | -1443.3 | -883.3 | -2636.1 | -560.5  | -1452.0 |
| c3mim-dca-p3   | -62.5  | -46.7 | -1467.8 | -4110.4 | -882.1 | -2631.8 | -558.3  | -1443.5 | -883.1 | -2635.9 | -560.4  | -1452.1 |
| c3mim-dca-p4   | -75.9  | -58.5 | -1473.0 | -4116.4 | -881.7 | -2630.2 | -558.5  | -1443.1 | -883.0 | -2635.4 | -560.5  | -1451.9 |
| c3mim-dca-p5   | -72.3  | -55.6 | -1470.3 | -4114.2 | -881.1 | -2629.5 | -558.4  | -1443.2 | -882.5 | -2634.7 | -560.3  | -1451.3 |
| c3mim-dca-p6   | -70.9  | -54.9 | -1469.9 | -4113.4 | -881.2 | -2629.4 | -558.6  | -1443.3 | -882.5 | -2634.4 | -560.4  | -1451.1 |
| c3mim-mes-p1   | -61.6  | -42.3 | -1570.1 | -4416.7 | -882.4 | -2631.2 | -660.5  | -1751.1 | -883.8 | -2636.3 | -663.1  | -1761.3 |
| c3mim-mes-p2   | -54.2  | -36.6 | -1565.3 | -4411.1 | -881.3 | -2629.2 | -660.5  | -1751.2 | -882.5 | -2634.1 | -662.8  | -1760.3 |
| c3mim-ntf2-p1  | -101.8 | -71.2 | -2995.5 | -7913.9 | -881.6 | -2629.8 | -2072.1 | -5224.1 | -883.8 | -2638.3 | -2076.4 | -5239.8 |
| c3mim-ntf2-p2  | -67.7  | -44.0 | -2982.4 | -7893.9 | -882.0 | -2631.8 | -2071.6 | -5223.2 | -883.3 | -2637.2 | -2075.3 | -5236.5 |
| c3mim-ntf2-p3  | -61.5  | -38.8 | -2980.0 | -7888.6 | -881.5 | -2630.6 | -2072.0 | -5223.0 | -883.0 | -2636.5 | -2075.2 | -5235.1 |
| c3mim-ntf2-p4  | -86.7  | -61.0 | -2989.2 | -7904.5 | -881.2 | -2629.1 | -2072.3 | -5224.3 | -883.1 | -2636.4 | -2075.9 | -5237.2 |
| c3mim-pf6-p1   | -48.6  | -33.3 | -1927.4 | -5288.0 | -881.4 | -2629.4 | -1026.2 | -2629.8 | -882.6 | -2634.1 | -1028.2 | -2637.3 |
| c3mim-pf6-p2   | -43.5  | -29.2 | -1924.8 | -5284.5 | -880.9 | -2628.6 | -1026.3 | -2630.1 | -882.0 | -2633.0 | -1028.1 | -2637.0 |
| c3mim-tos-p1   | -64.6  | -43.1 | -2155.1 | -5956.1 | -882.2 | -2630.9 | -1244.9 | -3288.6 | -883.8 | -2636.9 | -1247.8 | -3299.6 |
| c3mim-tos-p2   | -61.4  | -41.0 | -2153.2 | -5953.6 | -881.8 | -2630.1 | -1244.9 | -3288.6 | -883.4 | -2635.9 | -1247.6 | -3298.9 |



|                |       |       |         |         |        |         |         |         |        |         |         |         |
|----------------|-------|-------|---------|---------|--------|---------|---------|---------|--------|---------|---------|---------|
| c3mpyr-bf4-p1  | -39.6 | -26.5 | -1535.4 | -4495.5 | -846.1 | -2734.8 | -672.6  | -1737.8 | -847.1 | -2738.7 | -674.1  | -1744.5 |
| c3mpyr-bf4-p2  | -36.2 | -24.4 | -1534.4 | -4493.8 | -846.4 | -2735.2 | -672.6  | -1737.9 | -847.2 | -2738.5 | -674.1  | -1744.1 |
| c3mpyr-bf4-p3  | -36.0 | -24.0 | -1534.0 | -4493.6 | -846.1 | -2735.1 | -672.6  | -1737.8 | -847.0 | -2738.4 | -674.1  | -1744.1 |
| c3mpyr-br-p1   | -57.9 | -37.7 | -986.1  | -3042.4 | -846.7 | -2736.0 | -114.2  | -273.7  | -847.1 | -2737.5 | -118.9  | -287.3  |
| c3mpyr-br-p2   | -54.1 | -35.2 | -984.3  | -3040.5 | -846.6 | -2736.3 | -114.2  | -273.7  | -847.0 | -2737.5 | -118.6  | -286.5  |
| c3mpyr-br-p3   | -54.1 | -35.3 | -984.4  | -3040.4 | -846.7 | -2736.2 | -114.2  | -273.7  | -847.0 | -2737.5 | -118.6  | -286.5  |
| c3mpyr-cl-p1   | -44.3 | -32.2 | -980.1  | -3064.9 | -846.8 | -2736.1 | -113.6  | -304.1  | -847.2 | -2737.6 | -115.4  | -312.5  |
| c3mpyr-cl-p2   | -42.2 | -30.8 | -979.1  | -3063.9 | -846.6 | -2736.5 | -113.6  | -304.1  | -846.9 | -2737.8 | -115.3  | -312.1  |
| c3mpyr-cl-p3   | -41.5 | -30.4 | -979.0  | -3063.4 | -846.7 | -2736.4 | -113.6  | -304.1  | -847.1 | -2737.6 | -115.3  | -312.0  |
| c3mpyr-dca-p1  | -51.3 | -37.6 | -1420.8 | -4190.6 | -846.3 | -2735.3 | -551.8  | -1426.7 | -847.3 | -2739.0 | -553.5  | -1433.9 |
| c3mpyr-dca-p2  | -53.5 | -39.4 | -1421.4 | -4192.2 | -846.2 | -2735.3 | -551.8  | -1426.8 | -847.2 | -2739.0 | -553.6  | -1434.4 |
| c3mpyr-dca-p3  | -49.5 | -36.3 | -1418.8 | -4192.5 | -846.3 | -2735.3 | -552.1  | -1428.1 | -847.2 | -2738.8 | -553.9  | -1435.1 |
| c3mpyr-dca-p4  | -52.3 | -38.4 | -1420.8 | -4191.8 | -846.4 | -2735.4 | -551.7  | -1426.7 | -847.4 | -2739.0 | -553.5  | -1434.2 |
| c3mpyr-dca-p5  | -54.5 | -40.0 | -1421.6 | -4193.0 | -846.3 | -2735.3 | -551.7  | -1426.8 | -847.3 | -2739.1 | -553.6  | -1434.6 |
| c3mpyr-mes-p1  | -50.9 | -32.8 | -1529.2 | -4516.6 | -846.1 | -2735.2 | -660.7  | -1752.9 | -847.3 | -2739.6 | -663.2  | -1762.9 |
| c3mpyr-mes-p2  | -45.8 | -29.2 | -1527.6 | -4514.3 | -846.7 | -2735.7 | -660.7  | -1753.0 | -847.7 | -2739.6 | -663.1  | -1762.3 |
| c3mpyr-mes-p3  | -44.6 | -28.2 | -1526.8 | -4513.4 | -846.3 | -2735.8 | -660.7  | -1752.9 | -847.2 | -2739.5 | -663.1  | -1762.3 |
| c3mpyr-ntf2-p1 | -68.0 | -45.1 | -2944.9 | -7999.5 | -846.4 | -2734.9 | -2070.9 | -5224.2 | -847.9 | -2740.5 | -2074.4 | -5236.4 |
| c3mpyr-ntf2-p2 | -52.9 | -33.2 | -2938.9 | -7988.5 | -846.1 | -2734.7 | -2070.7 | -5223.0 | -847.4 | -2739.7 | -2073.5 | -5233.5 |
| c3mpyr-ntf2-p3 | -63.6 | -42.1 | -2943.0 | -7996.5 | -846.1 | -2734.7 | -2070.9 | -5224.1 | -847.4 | -2739.8 | -2074.2 | -5236.0 |
| c3mpyr-ntf2-p4 | -64.4 | -42.8 | -2943.3 | -7997.0 | -846.2 | -2734.9 | -2070.8 | -5224.0 | -847.5 | -2740.0 | -2074.2 | -5235.9 |
| c3mpyr-ntf2-p5 | -54.7 | -34.8 | -2939.1 | -7989.5 | -845.9 | -2734.6 | -2070.6 | -5222.8 | -847.1 | -2739.4 | -2073.5 | -5233.7 |
| c3mpyr-ntf2-p6 | -53.5 | -34.2 | -2939.1 | -7989.1 | -846.2 | -2734.9 | -2070.7 | -5222.9 | -847.4 | -2739.5 | -2073.6 | -5233.5 |
| c3mpyr-pf6-p1  | -41.9 | -27.5 | -1889.8 | -5389.7 | -846.0 | -2734.6 | -1026.5 | -2630.5 | -847.0 | -2738.4 | -1028.4 | -2638.2 |
| c3mpyr-pf6-p2  | -37.8 | -24.8 | -1888.5 | -5387.4 | -846.2 | -2734.9 | -1026.5 | -2630.6 | -847.1 | -2738.2 | -1028.3 | -2637.6 |
| c3mpyr-pf6-p3  | -37.8 | -24.7 | -1888.3 | -5387.6 | -846.1 | -2734.8 | -1026.5 | -2630.6 | -846.9 | -2738.2 | -1028.3 | -2637.8 |
| c3mpyr-tos-p1  | -51.2 | -31.5 | -2113.1 | -6054.3 | -846.1 | -2735.2 | -1244.7 | -3290.2 | -847.4 | -2740.2 | -1247.5 | -3300.8 |
| c3mpyr-tos-p2  | -46.1 | -28.0 | -2111.4 | -6051.8 | -846.6 | -2735.6 | -1244.7 | -3290.3 | -847.8 | -2740.1 | -1247.3 | -3300.1 |
| c4mim-bf4-p1   | -43.3 | -29.1 | -1664.9 | -4693.7 | -973.9 | -2928.6 | -673.1  | -1739.7 | -975.1 | -2933.1 | -674.7  | -1746.6 |
| c4mim-bf4-p2   | -41.9 | -28.3 | -1664.1 | -4692.6 | -973.8 | -2928.2 | -673.1  | -1739.7 | -974.9 | -2932.6 | -674.7  | -1746.2 |
| c4mim-br-p1    | -59.2 | -38.3 | -1116.1 | -3247.4 | -976.2 | -2940.4 | -114.2  | -273.7  | -976.6 | -2942.2 | -119.1  | -287.3  |
| c4mim-br-p2    | -41.8 | -23.5 | -1110.5 | -3239.1 | -977.1 | -2942.9 | -114.2  | -273.7  | -977.4 | -2944.1 | -118.4  | -286.2  |
| c4mim-br-p3    | -47.1 | -28.2 | -1112.5 | -3241.2 | -976.7 | -2942.1 | -114.2  | -273.7  | -977.0 | -2943.3 | -118.7  | -286.5  |
| c4mim-br-p4    | -60.1 | -39.1 | -1116.5 | -3248.1 | -976.2 | -2940.4 | -114.2  | -273.7  | -976.8 | -2942.4 | -119.0  | -287.3  |
| c4mim-cl-p1    | -44.3 | -31.4 | -1109.2 | -3268.9 | -976.0 | -2940.1 | -113.6  | -304.1  | -976.6 | -2942.0 | -115.4  | -312.7  |
| c4mim-cl-p2    | -30.1 | -19.2 | -1106.0 | -3262.7 | -977.3 | -2943.6 | -113.6  | -304.1  | -977.6 | -2944.8 | -115.2  | -311.9  |
| c4mim-cl-p3    | -34.6 | -23.5 | -1107.4 | -3264.3 | -976.8 | -2942.5 | -113.6  | -304.1  | -977.2 | -2943.8 | -115.2  | -312.0  |
| c4mim-cl-p4    | -44.6 | -31.5 | -1109.2 | -3269.2 | -976.0 | -2940.1 | -113.6  | -304.1  | -976.6 | -2942.2 | -115.4  | -312.6  |
| c4mim-dca-p1   | -74.7 | -56.8 | -1564.2 | -4415.4 | -973.8 | -2929.0 | -558.4  | -1443.5 | -975.2 | -2934.4 | -560.6  | -1452.6 |



|                |       |       |         |         |        |         |         |         |        |         |         |         |
|----------------|-------|-------|---------|---------|--------|---------|---------|---------|--------|---------|---------|---------|
| c4mim-dca-p2   | -78.2 | -60.1 | -1566.2 | -4416.8 | -974.0 | -2929.2 | -558.5  | -1443.2 | -975.4 | -2934.5 | -560.6  | -1452.4 |
| c4mim-dca-p3   | -72.9 | -55.9 | -1562.6 | -4413.4 | -973.3 | -2928.2 | -558.4  | -1443.2 | -974.7 | -2933.5 | -560.3  | -1451.5 |
| c4mim-mes-p1   | -63.5 | -43.4 | -1663.1 | -4716.8 | -974.7 | -2930.1 | -660.5  | -1751.1 | -976.1 | -2935.4 | -663.2  | -1761.7 |
| c4mim-mes-p2   | -54.5 | -36.7 | -1657.5 | -4710.0 | -973.4 | -2927.9 | -660.5  | -1751.2 | -974.7 | -2932.8 | -662.9  | -1760.4 |
| c4mim-pf6-p1   | -50.9 | -34.2 | -2021.2 | -5588.6 | -973.8 | -2928.6 | -1026.3 | -2630.1 | -975.1 | -2933.5 | -1028.5 | -2638.5 |
| c4mim-pf6-p2   | -43.7 | -29.3 | -2017.1 | -5583.5 | -973.1 | -2927.3 | -1026.3 | -2630.1 | -974.3 | -2931.7 | -1028.1 | -2637.1 |
| c4mim-tos-p1   | -67.8 | -45.1 | -2248.7 | -6257.0 | -974.6 | -2929.9 | -1244.9 | -3288.6 | -976.2 | -2936.2 | -1248.0 | -3300.2 |
| c4mim-tos-p2   | -62.4 | -41.9 | -2246.5 | -6253.4 | -974.5 | -2929.5 | -1244.9 | -3288.6 | -976.0 | -2935.3 | -1247.7 | -3299.0 |
| c4mpyr-bf4-p1  | -39.9 | -26.6 | -1627.8 | -4795.4 | -938.4 | -3034.5 | -672.6  | -1737.8 | -939.4 | -3038.3 | -674.2  | -1744.7 |
| c4mpyr-bf4-p2  | -36.7 | -24.6 | -1626.8 | -4793.8 | -938.7 | -3034.8 | -672.6  | -1737.9 | -939.6 | -3038.2 | -674.1  | -1744.2 |
| c4mpyr-bf4-p3  | -36.3 | -24.2 | -1626.5 | -4793.6 | -938.5 | -3034.8 | -672.6  | -1737.9 | -939.4 | -3038.2 | -674.1  | -1744.3 |
| c4mpyr-br-p1   | -58.4 | -38.0 | -1078.6 | -3342.4 | -939.1 | -3035.7 | -114.2  | -273.7  | -939.5 | -3037.1 | -118.9  | -287.4  |
| c4mpyr-br-p2   | -54.7 | -35.6 | -1076.9 | -3340.7 | -939.0 | -3036.0 | -114.2  | -273.7  | -939.3 | -3037.3 | -118.7  | -286.7  |
| c4mpyr-br-p3   | -54.6 | -35.5 | -1077.0 | -3340.3 | -939.0 | -3035.9 | -114.2  | -273.7  | -939.3 | -3037.1 | -118.7  | -286.7  |
| c4mpyr-cl-p1   | -44.4 | -32.2 | -1072.4 | -3364.6 | -939.1 | -3035.7 | -113.6  | -304.1  | -939.5 | -3037.2 | -115.4  | -312.6  |
| c4mpyr-cl-p2   | -43.1 | -31.4 | -1071.8 | -3364.2 | -938.9 | -3036.2 | -113.6  | -304.1  | -939.3 | -3037.6 | -115.4  | -312.4  |
| c4mpyr-cl-p3   | -41.7 | -30.5 | -1071.3 | -3363.1 | -939.1 | -3036.0 | -113.6  | -304.1  | -939.4 | -3037.3 | -115.3  | -312.0  |
| c4mpyr-dca-p1  | -53.2 | -38.0 | -1512.6 | -4492.3 | -938.5 | -3034.5 | -551.8  | -1427.0 | -939.7 | -3038.6 | -553.7  | -1434.9 |
| c4mpyr-dca-p2  | -53.7 | -39.5 | -1513.8 | -4492.0 | -938.6 | -3035.0 | -551.8  | -1426.8 | -939.5 | -3038.7 | -553.6  | -1434.5 |
| c4mpyr-dca-p3  | -52.5 | -38.5 | -1513.5 | -4490.9 | -938.6 | -3034.8 | -551.8  | -1426.7 | -939.6 | -3038.7 | -553.5  | -1434.1 |
| c4mpyr-dca-p4  | -54.0 | -38.8 | -1513.4 | -4492.7 | -938.6 | -3034.9 | -551.8  | -1426.9 | -939.7 | -3039.1 | -553.7  | -1434.9 |
| c4mpyr-dca-p5  | -54.8 | -40.2 | -1514.0 | -4492.9 | -938.6 | -3034.9 | -551.7  | -1426.8 | -939.6 | -3038.8 | -553.6  | -1434.7 |
| c4mpyr-mes-p1  | -51.2 | -32.8 | -1621.6 | -4816.5 | -938.5 | -3034.9 | -660.7  | -1752.9 | -939.6 | -3039.3 | -663.3  | -1763.1 |
| c4mpyr-mes-p2  | -46.7 | -29.7 | -1620.2 | -4814.6 | -939.0 | -3035.4 | -660.7  | -1753.0 | -940.0 | -3039.3 | -663.1  | -1762.5 |
| c4mpyr-mes-p3  | -45.2 | -28.4 | -1619.4 | -4813.5 | -938.6 | -3035.5 | -660.7  | -1752.9 | -939.6 | -3039.3 | -663.1  | -1762.5 |
| c4mpyr-ntf2-p1 | -68.6 | -45.2 | -3037.3 | -8299.4 | -938.7 | -3034.5 | -2070.9 | -5224.1 | -940.2 | -3040.2 | -2074.4 | -5236.6 |
| c4mpyr-ntf2-p2 | -60.0 | -37.9 | -3033.6 | -8292.1 | -938.4 | -3034.2 | -2070.5 | -5222.6 | -939.9 | -3039.7 | -2073.7 | -5234.5 |
| c4mpyr-ntf2-p3 | -65.5 | -43.2 | -3036.1 | -8297.5 | -938.4 | -3034.5 | -2070.9 | -5224.1 | -939.8 | -3039.8 | -2074.3 | -5236.4 |
| c4mpyr-ntf2-p4 | -66.1 | -43.8 | -3036.3 | -8297.8 | -938.5 | -3034.5 | -2070.9 | -5224.1 | -939.9 | -3039.8 | -2074.3 | -5236.3 |
| c4mpyr-ntf2-p5 | -55.8 | -35.4 | -3031.8 | -8289.9 | -938.2 | -3034.3 | -2070.6 | -5222.8 | -939.5 | -3039.3 | -2073.6 | -5234.0 |
| c4mpyr-ntf2-p6 | -55.8 | -35.6 | -3032.3 | -8290.1 | -938.6 | -3034.5 | -2070.6 | -5222.8 | -939.8 | -3039.4 | -2073.6 | -5234.0 |
| c4mpyr-pf6-p1  | -42.2 | -27.6 | -1982.3 | -5689.6 | -938.3 | -3034.3 | -1026.5 | -2630.6 | -939.3 | -3038.2 | -1028.5 | -2638.4 |
| c4mpyr-pf6-p2  | -38.5 | -25.2 | -1981.1 | -5687.7 | -938.6 | -3034.6 | -1026.5 | -2630.6 | -939.5 | -3038.0 | -1028.3 | -2637.8 |
| c4mpyr-pf6-p3  | -38.3 | -24.9 | -1980.8 | -5687.6 | -938.4 | -3034.5 | -1026.5 | -2630.6 | -939.3 | -3037.9 | -1028.4 | -2637.9 |
| c4mpyr-tos-p1  | -51.7 | -31.8 | -2205.7 | -6354.4 | -938.5 | -3035.0 | -1244.7 | -3290.2 | -939.8 | -3039.9 | -1247.5 | -3301.0 |
| c4mpyr-tos-p2  | -47.1 | -28.7 | -2204.2 | -6352.3 | -939.0 | -3035.4 | -1244.7 | -3290.3 | -940.2 | -3039.9 | -1247.4 | -3300.3 |



## 2.2.8 CCT basis set

Table S 9: Raw CCT energies. Superscript \* indicates monomer calculated in the dimer basis set.

| ion pair       | E(int) | E(int) CP | E(dimer) SS | E(dimer) OS | E(A) SS | E(A) OS | E(B) SS | E(B) OS | E(A) SS* | E(A) OS* | E(B) SS* | E(B) OS* |
|----------------|--------|-----------|-------------|-------------|---------|---------|---------|---------|----------|----------|----------|----------|
| c1mim-bf4-p1   | -36.2  | -25.1     | -1584.7     | -4600.0     | -783.0  | -2420.1 | -785.9  | -2159.4 | -783.4   | -2421.4  | -788.8   | -2165.9  |
| c1mim-br-p1    | -48.3  | -37.4     | -984.7      | -2878.7     | -785.0  | -2427.9 | -177.4  | -425.0  | -785.2   | -2428.6  | -180.2   | -432.0   |
| c1mim-br-p2    | -33.3  | -24.2     | -978.2      | -2870.1     | -784.7  | -2427.9 | -177.4  | -425.0  | -784.8   | -2428.3  | -179.8   | -431.3   |
| c1mim-cl-p1    | -40.0  | -30.4     | -932.8      | -2836.6     | -784.8  | -2427.6 | -129.6  | -387.4  | -785.0   | -2428.3  | -131.9   | -393.8   |
| c1mim-cl-p2    | -30.9  | -22.9     | -929.7      | -2831.6     | -785.0  | -2428.5 | -129.6  | -387.4  | -785.0   | -2428.8  | -131.3   | -393.2   |
| c1mim-dca-p1   | -62.3  | -54.3     | -1436.5     | -4162.9     | -783.5  | -2421.4 | -624.1  | -1708.2 | -783.9   | -2422.7  | -625.9   | -1712.6  |
| c1mim-dca-p2   | -47.0  | -40.6     | -1429.7     | -4155.4     | -783.6  | -2422.5 | -623.7  | -1708.2 | -783.8   | -2423.2  | -625.2   | -1712.3  |
| c1mim-mes-p1   | -48.6  | -34.5     | -1554.1     | -4556.8     | -783.5  | -2420.9 | -747.7  | -2110.1 | -783.8   | -2422.2  | -751.8   | -2118.6  |
| c1mim-ntf2-p1  | -74.6  | -60.6     | -3200.9     | -8859.3     | -783.1  | -2420.2 | -2384.1 | -6398.2 | -783.5   | -2422.0  | -2387.9  | -6406.3  |
| c1mim-ntf2-p2  | -43.5  | -33.6     | -3187.4     | -8841.3     | -783.4  | -2422.0 | -2383.4 | -6396.4 | -783.5   | -2422.8  | -2386.0  | -6402.8  |
| c1mim-ntf2-p3  | -45.2  | -34.3     | -3189.0     | -8841.6     | -783.1  | -2421.0 | -2384.1 | -6397.2 | -783.4   | -2422.2  | -2387.0  | -6403.6  |
| c1mim-pf6-p1   | -39.5  | -27.2     | -1996.2     | -5703.2     | -783.0  | -2420.2 | -1195.8 | -3260.8 | -783.3   | -2421.3  | -1199.4  | -3268.1  |
| c1mim-tos-p1   | -45.3  | -32.4     | -2202.0     | -6376.3     | -783.2  | -2420.7 | -1397.3 | -3931.8 | -783.5   | -2421.9  | -1401.0  | -3939.5  |
| c1mpyr-bf4-p1  | -37.4  | -26.4     | -1543.5     | -4712.1     | -741.1  | -2533.7 | -785.5  | -2158.0 | -741.2   | -2534.4  | -788.7   | -2164.9  |
| c1mpyr-bf4-p2  | -34.5  | -24.7     | -1542.3     | -4710.8     | -741.2  | -2533.9 | -785.5  | -2158.0 | -741.3   | -2534.4  | -788.4   | -2164.3  |
| c1mpyr-br-p1   | -50.3  | -40.0     | -942.3      | -2986.8     | -741.7  | -2534.7 | -177.4  | -425.0  | -741.8   | -2535.0  | -180.2   | -432.1   |
| c1mpyr-br-p2   | -47.9  | -38.2     | -941.2      | -2985.7     | -741.7  | -2534.9 | -177.4  | -425.0  | -741.8   | -2535.2  | -180.0   | -431.7   |
| c1mpyr-cl-p1   | -44.2  | -35.3     | -891.7      | -2946.1     | -741.8  | -2534.8 | -129.6  | -387.4  | -741.8   | -2535.1  | -131.8   | -393.8   |
| c1mpyr-cl-p2   | -43.0  | -34.5     | -891.1      | -2945.6     | -741.8  | -2535.0 | -129.6  | -387.4  | -741.8   | -2535.2  | -131.7   | -393.5   |
| c1mpyr-dca-p1  | -44.0  | -37.7     | -1381.1     | -4250.3     | -741.6  | -2534.4 | -618.1  | -1693.3 | -741.7   | -2535.0  | -619.8   | -1697.2  |
| c1mpyr-dca-p2  | -47.5  | -41.3     | -1382.1     | -4252.6     | -741.4  | -2534.1 | -618.1  | -1693.6 | -741.6   | -2534.8  | -619.7   | -1697.4  |
| c1mpyr-dca-p3  | -44.9  | -38.7     | -1379.3     | -4252.9     | -741.1  | -2533.9 | -618.1  | -1694.3 | -741.3   | -2534.6  | -619.5   | -1698.2  |
| c1mpyr-dca-p4  | -46.1  | -39.9     | -1381.2     | -4251.6     | -741.1  | -2533.9 | -618.1  | -1693.6 | -741.3   | -2534.6  | -619.7   | -1697.3  |
| c1mpyr-mes-p1  | -46.1  | -32.8     | -1510.9     | -4669.2     | -741.1  | -2534.0 | -747.7  | -2111.3 | -741.2   | -2534.7  | -751.7   | -2119.8  |
| c1mpyr-mes-p2  | -41.2  | -29.4     | -1508.8     | -4666.9     | -741.3  | -2534.3 | -747.7  | -2111.3 | -741.4   | -2534.9  | -751.1   | -2118.9  |
| c1mpyr-ntf2-p1 | -52.8  | -42.3     | -3148.0     | -8960.1     | -741.4  | -2533.8 | -2382.6 | -6397.5 | -741.6   | -2534.5  | -2385.7  | -6404.0  |
| c1mpyr-ntf2-p2 | -40.6  | -31.4     | -3142.8     | -8951.4     | -741.1  | -2533.5 | -2382.6 | -6396.4 | -741.3   | -2534.2  | -2385.3  | -6402.1  |
| c1mpyr-ntf2-p3 | -51.5  | -41.3     | -3147.4     | -8959.1     | -741.4  | -2533.9 | -2382.6 | -6397.2 | -741.5   | -2534.5  | -2385.5  | -6403.7  |
| c1mpyr-ntf2-p5 | -41.8  | -32.4     | -3143.5     | -8951.9     | -741.3  | -2533.7 | -2382.5 | -6396.1 | -741.5   | -2534.4  | -2385.2  | -6402.0  |
| c1mpyr-pf6-p1  | -37.8  | -26.5     | -1954.0     | -5815.5     | -741.1  | -2533.6 | -1195.9 | -3261.2 | -741.2   | -2534.2  | -1199.4  | -3268.3  |
| c1mpyr-pf6-p2  | -34.9  | -24.7     | -1952.8     | -5814.2     | -741.2  | -2533.7 | -1196.0 | -3261.3 | -741.3   | -2534.2  | -1199.1  | -3267.8  |
| c1mpyr-tos-p1  | -42.7  | -30.2     | -2158.7     | -6488.1     | -741.1  | -2534.0 | -1396.6 | -3932.4 | -741.2   | -2534.7  | -1400.3  | -3940.2  |
| c1mpyr-tos-p2  | -37.6  | -26.4     | -2156.1     | -6485.7     | -741.2  | -2534.1 | -1396.6 | -3932.3 | -741.3   | -2534.7  | -1399.9  | -3939.5  |



|               |       |       |         |         |        |         |         |         |        |         |         |         |
|---------------|-------|-------|---------|---------|--------|---------|---------|---------|--------|---------|---------|---------|
| c2mim-bf4-p1  | -38.6 | -26.5 | -1691.1 | -4956.7 | -888.2 | -2775.7 | -785.9  | -2159.4 | -888.6 | -2777.0 | -789.1  | -2166.5 |
| c2mim-bf4-p2  | -35.9 | -24.8 | -1689.3 | -4954.7 | -887.8 | -2775.1 | -785.9  | -2159.4 | -888.1 | -2776.3 | -788.8  | -2165.9 |
| c2mim-br-p1   | -50.0 | -38.6 | -1090.0 | -3234.8 | -889.6 | -2782.9 | -177.4  | -425.0  | -889.8 | -2783.6 | -180.4  | -432.4  |
| c2mim-br-p2   | -37.3 | -27.3 | -1085.9 | -3229.1 | -890.6 | -2784.8 | -177.4  | -425.0  | -890.7 | -2785.2 | -180.0  | -431.9  |
| c2mim-br-p3   | -37.6 | -27.6 | -1085.3 | -3228.4 | -889.8 | -2783.9 | -177.4  | -425.0  | -889.9 | -2784.3 | -180.0  | -431.8  |
| c2mim-br-p4   | -49.8 | -38.8 | -1090.7 | -3235.7 | -890.3 | -2784.0 | -177.4  | -425.0  | -890.5 | -2784.7 | -180.3  | -432.1  |
| c2mim-cl-p1   | -42.0 | -31.8 | -1038.3 | -3192.9 | -889.5 | -2782.8 | -129.6  | -387.4  | -889.7 | -2783.4 | -132.1  | -394.3  |
| c2mim-cl-p2   | -33.6 | -24.8 | -1036.8 | -3190.0 | -890.8 | -2785.4 | -129.6  | -387.4  | -890.9 | -2785.8 | -131.5  | -393.7  |
| c2mim-cl-p3   | -34.0 | -25.2 | -1036.1 | -3189.4 | -890.1 | -2784.4 | -129.6  | -387.4  | -890.1 | -2784.8 | -131.6  | -393.8  |
| c2mim-cl-p4   | -41.1 | -31.4 | -1038.4 | -3193.3 | -890.0 | -2783.6 | -129.6  | -387.4  | -890.2 | -2784.3 | -131.9  | -393.9  |
| c2mim-dca-p1  | -64.2 | -56.0 | -1541.8 | -4519.0 | -888.1 | -2776.1 | -623.9  | -1708.5 | -888.5 | -2777.4 | -625.8  | -1713.1 |
| c2mim-dca-p2  | -60.3 | -52.4 | -1540.4 | -4516.6 | -888.3 | -2776.1 | -624.0  | -1708.3 | -888.6 | -2777.4 | -625.9  | -1712.7 |
| c2mim-dca-p3  | -64.5 | -56.3 | -1543.0 | -4519.6 | -888.8 | -2776.7 | -624.1  | -1708.3 | -889.1 | -2778.1 | -626.1  | -1713.0 |
| c2mim-dca-p4  | -61.0 | -53.3 | -1540.6 | -4517.0 | -888.2 | -2776.1 | -624.0  | -1708.3 | -888.5 | -2777.4 | -625.8  | -1712.5 |
| c2mim-dca-p5  | -62.6 | -54.5 | -1541.3 | -4518.0 | -888.2 | -2776.2 | -624.1  | -1708.2 | -888.6 | -2777.6 | -625.9  | -1712.7 |
| c2mim-dca-p6  | -62.7 | -54.7 | -1541.0 | -4518.0 | -888.1 | -2775.8 | -624.1  | -1708.3 | -888.4 | -2777.2 | -625.9  | -1712.7 |
| c2mim-mes-p1  | -54.5 | -39.4 | -1662.3 | -4915.7 | -889.0 | -2776.9 | -747.6  | -2110.0 | -889.3 | -2778.1 | -752.0  | -2119.1 |
| c2mim-mes-p2  | -49.4 | -35.0 | -1659.0 | -4912.2 | -888.1 | -2775.7 | -747.7  | -2110.2 | -888.5 | -2777.0 | -751.9  | -2118.8 |
| c2mim-ntf2-p1 | -81.4 | -65.7 | -3309.2 | -9218.5 | -888.3 | -2775.8 | -2384.1 | -6398.1 | -888.8 | -2777.6 | -2388.4 | -6407.3 |
| c2mim-ntf2-p2 | -54.2 | -42.3 | -3297.6 | -9203.6 | -888.5 | -2777.5 | -2383.7 | -6397.3 | -888.8 | -2778.4 | -2386.9 | -6404.8 |
| c2mim-ntf2-p3 | -48.7 | -37.0 | -3295.8 | -9198.5 | -888.1 | -2776.3 | -2384.1 | -6397.1 | -888.4 | -2777.5 | -2387.3 | -6404.1 |
| c2mim-ntf2-p4 | -71.7 | -57.4 | -3305.2 | -9213.4 | -888.2 | -2775.8 | -2384.4 | -6398.4 | -888.6 | -2777.5 | -2388.3 | -6406.8 |
| c2mim-pf6-p1  | -43.8 | -30.0 | -2103.3 | -6060.8 | -888.1 | -2775.6 | -1195.8 | -3260.8 | -888.4 | -2776.8 | -1199.9 | -3269.0 |
| c2mim-pf6-p2  | -39.8 | -27.4 | -2101.0 | -6058.2 | -887.7 | -2775.0 | -1195.8 | -3260.8 | -888.0 | -2776.1 | -1199.5 | -3268.2 |
| c2mim-tos-p1  | -53.2 | -38.5 | -2311.3 | -6736.3 | -888.8 | -2776.7 | -1397.2 | -3931.7 | -889.2 | -2778.0 | -1401.4 | -3940.4 |
| c2mim-tos-p2  | -47.1 | -33.3 | -2307.7 | -6732.2 | -888.1 | -2775.8 | -1397.2 | -3931.8 | -888.5 | -2777.1 | -1401.2 | -3939.9 |
| c2mpyr-bf4-p1 | -38.1 | -26.8 | -1650.6 | -5070.7 | -847.9 | -2891.8 | -785.5  | -2157.9 | -848.0 | -2892.6 | -788.8  | -2165.1 |
| c2mpyr-bf4-p2 | -35.9 | -25.2 | -1650.1 | -5070.0 | -848.4 | -2892.3 | -785.5  | -2158.0 | -848.5 | -2893.0 | -788.6  | -2164.8 |
| c2mpyr-bf4-p3 | -35.5 | -25.2 | -1649.5 | -5069.5 | -848.0 | -2892.1 | -785.5  | -2158.0 | -848.1 | -2892.7 | -788.5  | -2164.5 |
| c2mpyr-br-p1  | -51.4 | -40.7 | -1049.6 | -3345.5 | -848.5 | -2892.8 | -177.4  | -425.0  | -848.6 | -2893.1 | -180.3  | -432.3  |
| c2mpyr-br-p2  | -49.8 | -39.4 | -1048.8 | -3345.1 | -848.5 | -2893.3 | -177.4  | -425.0  | -848.5 | -2893.6 | -180.2  | -432.1  |
| c2mpyr-br-p3  | -48.9 | -38.9 | -1048.3 | -3344.3 | -848.4 | -2892.9 | -177.4  | -425.0  | -848.5 | -2893.2 | -180.1  | -431.9  |
| c2mpyr-cl-p1  | -44.8 | -35.7 | -998.7  | -3304.5 | -848.6 | -2892.9 | -129.6  | -387.4  | -848.7 | -2893.2 | -131.9  | -393.9  |
| c2mpyr-cl-p2  | -43.7 | -34.8 | -998.0  | -3304.2 | -848.3 | -2893.1 | -129.6  | -387.4  | -848.4 | -2893.4 | -131.8  | -393.8  |
| c2mpyr-cl-p3  | -43.3 | -34.7 | -998.0  | -3303.9 | -848.6 | -2893.1 | -129.6  | -387.4  | -848.6 | -2893.3 | -131.7  | -393.6  |
| c2mpyr-dca-p1 | -44.1 | -37.8 | -1487.9 | -4608.5 | -848.4 | -2892.5 | -618.1  | -1693.3 | -848.5 | -2893.1 | -619.8  | -1697.2 |
| c2mpyr-dca-p2 | -47.5 | -40.9 | -1489.0 | -4610.5 | -848.0 | -2892.2 | -618.2  | -1693.7 | -848.2 | -2892.9 | -619.9  | -1697.6 |
| c2mpyr-dca-p3 | -47.9 | -41.6 | -1489.0 | -4610.9 | -848.1 | -2892.2 | -618.1  | -1693.6 | -848.3 | -2892.9 | -619.7  | -1697.4 |
| c2mpyr-mes-p1 | -47.7 | -33.7 | -1618.4 | -5028.3 | -847.9 | -2892.1 | -747.7  | -2111.3 | -848.1 | -2892.9 | -751.9  | -2120.1 |



|                |       |       |         |         |        |         |         |         |        |         |         |         |
|----------------|-------|-------|---------|---------|--------|---------|---------|---------|--------|---------|---------|---------|
| c2mpyr-mes-p2  | -44.1 | -30.9 | -1617.3 | -5027.2 | -848.6 | -2892.7 | -747.7  | -2111.4 | -848.7 | -2893.3 | -751.7  | -2119.8 |
| c2mpyr-mes-p3  | -42.9 | -30.5 | -1616.3 | -5026.2 | -848.1 | -2892.5 | -747.7  | -2111.3 | -848.2 | -2893.2 | -751.3  | -2119.2 |
| c2mpyr-ntf2-p1 | -53.9 | -43.0 | -3255.5 | -9318.8 | -848.2 | -2891.8 | -2382.8 | -6397.6 | -848.4 | -2892.6 | -2386.0 | -6404.3 |
| c2mpyr-ntf2-p2 | -42.9 | -33.1 | -3250.7 | -9310.9 | -847.9 | -2891.6 | -2382.6 | -6396.6 | -848.0 | -2892.4 | -2385.4 | -6402.6 |
| c2mpyr-ntf2-p3 | -53.0 | -42.1 | -3254.9 | -9318.1 | -848.0 | -2891.9 | -2382.7 | -6397.5 | -848.2 | -2892.6 | -2385.9 | -6404.2 |
| c2mpyr-ntf2-p4 | -52.0 | -41.6 | -3254.4 | -9317.8 | -848.0 | -2891.9 | -2382.7 | -6397.5 | -848.2 | -2892.5 | -2385.8 | -6404.1 |
| c2mpyr-ntf2-p5 | -44.5 | -34.4 | -3251.2 | -9311.6 | -847.7 | -2891.6 | -2382.5 | -6396.4 | -847.9 | -2892.3 | -2385.5 | -6402.7 |
| c2mpyr-ntf2-p6 | -41.9 | -32.5 | -3250.5 | -9310.5 | -848.1 | -2891.9 | -2382.6 | -6396.5 | -848.2 | -2892.5 | -2385.4 | -6402.4 |
| c2mpyr-pf6-p1  | -38.2 | -26.7 | -2061.3 | -6174.1 | -848.1 | -2892.0 | -1195.9 | -3261.2 | -848.2 | -2892.6 | -1199.4 | -3268.4 |
| c2mpyr-pf6-p2  | -36.3 | -25.3 | -2060.5 | -6173.2 | -848.1 | -2892.0 | -1196.0 | -3261.3 | -848.3 | -2892.5 | -1199.4 | -3268.2 |
| c2mpyr-pf6-p3  | -35.6 | -25.1 | -2059.9 | -6172.8 | -848.0 | -2891.9 | -1196.0 | -3261.3 | -848.1 | -2892.4 | -1199.2 | -3268.0 |
| c2mpyr-tos-p1  | -44.5 | -31.4 | -2266.2 | -6847.3 | -847.9 | -2892.1 | -1396.6 | -3932.4 | -848.1 | -2892.9 | -1400.6 | -3940.6 |
| c2mpyr-tos-p2  | -41.1 | -28.7 | -2265.1 | -6846.2 | -848.5 | -2892.6 | -1396.6 | -3932.4 | -848.7 | -2893.3 | -1400.4 | -3940.2 |
| c3mim-bf4-p1   | -39.5 | -27.0 | -1795.3 | -5311.6 | -992.0 | -3130.2 | -785.9  | -2159.4 | -992.3 | -3131.5 | -789.2  | -2166.8 |
| c3mim-bf4-p2   | -38.5 | -26.6 | -1794.8 | -5311.2 | -992.0 | -3130.1 | -785.9  | -2159.4 | -992.3 | -3131.5 | -789.1  | -2166.5 |
| c3mim-br-p1    | -50.8 | -39.1 | -1194.2 | -3590.2 | -993.4 | -3137.9 | -177.4  | -425.0  | -993.6 | -3138.6 | -180.5  | -432.6  |
| c3mim-br-p2    | -37.8 | -27.6 | -1189.7 | -3584.1 | -994.1 | -3139.5 | -177.4  | -425.0  | -994.2 | -3140.0 | -180.0  | -431.9  |
| c3mim-br-p3    | -42.1 | -31.1 | -1191.3 | -3585.9 | -993.7 | -3139.0 | -177.4  | -425.0  | -993.8 | -3139.4 | -180.3  | -432.5  |
| c3mim-br-p4    | -51.8 | -39.8 | -1194.9 | -3591.5 | -993.7 | -3138.5 | -177.4  | -425.0  | -993.9 | -3139.3 | -180.6  | -432.8  |
| c3mim-cl-p1    | -42.4 | -32.1 | -1142.3 | -3548.1 | -993.3 | -3137.6 | -129.6  | -387.4  | -993.5 | -3138.3 | -132.1  | -394.4  |
| c3mim-cl-p2    | -33.7 | -24.9 | -1140.3 | -3544.8 | -994.3 | -3140.1 | -129.6  | -387.4  | -994.5 | -3140.5 | -131.6  | -393.7  |
| c3mim-cl-p3    | -37.2 | -27.5 | -1141.5 | -3546.1 | -993.9 | -3139.4 | -129.6  | -387.4  | -994.0 | -3139.8 | -131.9  | -394.3  |
| c3mim-cl-p4    | -42.4 | -32.0 | -1142.4 | -3548.7 | -993.5 | -3138.2 | -129.6  | -387.4  | -993.7 | -3138.9 | -132.1  | -394.4  |
| c3mim-dca-p1   | -65.2 | -56.8 | -1646.0 | -4874.0 | -991.9 | -3130.3 | -624.0  | -1708.6 | -992.2 | -3131.8 | -625.9  | -1713.2 |
| c3mim-dca-p2   | -66.2 | -57.8 | -1646.8 | -4875.1 | -992.3 | -3131.0 | -624.0  | -1708.4 | -992.7 | -3132.4 | -626.0  | -1713.0 |
| c3mim-dca-p3   | -57.3 | -49.5 | -1643.0 | -4870.7 | -992.3 | -3131.8 | -623.8  | -1708.5 | -992.6 | -3132.8 | -625.6  | -1713.2 |
| c3mim-dca-p4   | -67.7 | -58.9 | -1647.6 | -4874.9 | -992.0 | -3130.6 | -624.0  | -1708.3 | -992.4 | -3132.0 | -626.1  | -1713.1 |
| c3mim-dca-p5   | -63.8 | -55.7 | -1644.6 | -4872.6 | -991.4 | -3129.8 | -623.9  | -1708.3 | -991.8 | -3131.3 | -625.7  | -1712.7 |
| c3mim-dca-p6   | -62.9 | -54.8 | -1644.4 | -4872.3 | -991.5 | -3129.8 | -624.1  | -1708.4 | -991.9 | -3131.2 | -625.9  | -1712.8 |
| c3mim-mes-p1   | -57.4 | -41.4 | -1767.6 | -5271.9 | -992.8 | -3131.6 | -747.7  | -2110.1 | -993.2 | -3132.9 | -752.3  | -2119.7 |
| c3mim-mes-p2   | -50.0 | -35.4 | -1762.7 | -5266.7 | -991.7 | -3129.8 | -747.7  | -2110.2 | -992.0 | -3131.1 | -751.9  | -2119.0 |
| c3mim-ntf2-p1  | -85.2 | -68.5 | -3414.7 | -9575.1 | -992.0 | -3130.3 | -2384.1 | -6398.2 | -992.5 | -3132.2 | -2388.7 | -6407.9 |
| c3mim-ntf2-p2  | -58.5 | -45.7 | -3403.4 | -9560.1 | -992.2 | -3131.7 | -2383.7 | -6397.3 | -992.5 | -3132.7 | -2387.2 | -6405.3 |
| c3mim-ntf2-p3  | -50.6 | -38.3 | -3400.4 | -9553.9 | -991.8 | -3130.7 | -2384.1 | -6397.2 | -992.1 | -3132.0 | -2387.5 | -6404.5 |
| c3mim-ntf2-p4  | -72.8 | -58.8 | -3408.8 | -9568.0 | -991.6 | -3129.5 | -2384.4 | -6398.5 | -992.0 | -3131.2 | -2388.2 | -6406.7 |
| c3mim-pf6-p1   | -44.0 | -30.9 | -2206.8 | -6415.1 | -991.7 | -3129.8 | -1195.8 | -3260.6 | -992.0 | -3130.9 | -1199.6 | -3268.4 |
| c3mim-pf6-p2   | -39.9 | -27.5 | -2204.5 | -6412.5 | -991.3 | -3129.1 | -1195.8 | -3260.8 | -991.5 | -3130.2 | -1199.5 | -3268.2 |
| c3mim-tos-p1   | -56.6 | -40.9 | -2416.7 | -7092.7 | -992.6 | -3131.3 | -1397.2 | -3931.7 | -993.0 | -3132.7 | -1401.7 | -3941.0 |
| c3mim-tos-p2   | -53.3 | -38.5 | -2414.8 | -7090.6 | -992.3 | -3130.7 | -1397.3 | -3931.8 | -992.6 | -3132.1 | -1401.5 | -3940.6 |



|                |       |       |         |         |         |         |         |         |         |         |         |         |
|----------------|-------|-------|---------|---------|---------|---------|---------|---------|---------|---------|---------|---------|
| c3mpyr-bf4-p1  | -38.5 | -27.0 | -1754.4 | -5426.0 | -951.5  | -3246.8 | -785.5  | -2157.9 | -951.7  | -3247.6 | -788.8  | -2165.2 |
| c3mpyr-bf4-p2  | -36.1 | -25.3 | -1753.7 | -5425.0 | -951.9  | -3247.1 | -785.5  | -2158.0 | -952.1  | -3247.8 | -788.6  | -2164.9 |
| c3mpyr-bf4-p3  | -35.9 | -25.4 | -1753.3 | -5424.7 | -951.6  | -3247.0 | -785.5  | -2158.0 | -951.8  | -3247.6 | -788.5  | -2164.6 |
| c3mpyr-br-p1   | -52.3 | -41.4 | -1153.7 | -3701.0 | -952.2  | -3247.8 | -177.4  | -425.0  | -952.3  | -3248.1 | -180.4  | -432.4  |
| c3mpyr-br-p2   | -49.7 | -39.1 | -1152.2 | -3699.8 | -952.1  | -3247.9 | -177.4  | -425.0  | -952.1  | -3248.2 | -180.3  | -432.3  |
| c3mpyr-br-p3   | -49.7 | -39.5 | -1152.3 | -3699.8 | -952.1  | -3247.9 | -177.4  | -425.0  | -952.2  | -3248.2 | -180.2  | -432.0  |
| c3mpyr-cl-p1   | -45.2 | -36.0 | -1102.5 | -3659.8 | -952.2  | -3247.9 | -129.6  | -387.4  | -952.3  | -3248.2 | -131.9  | -394.0  |
| c3mpyr-cl-p2   | -44.0 | -35.0 | -1101.7 | -3659.3 | -952.0  | -3248.0 | -129.6  | -387.4  | -952.1  | -3248.3 | -131.8  | -393.9  |
| c3mpyr-cl-p3   | -43.6 | -34.9 | -1101.7 | -3659.1 | -952.2  | -3248.0 | -129.6  | -387.4  | -952.3  | -3248.3 | -131.8  | -393.7  |
| c3mpyr-dca-p1  | -45.3 | -38.7 | -1591.9 | -4964.1 | -951.8  | -3247.2 | -618.2  | -1693.5 | -952.0  | -3247.9 | -619.9  | -1697.5 |
| c3mpyr-dca-p2  | -47.5 | -40.8 | -1592.6 | -4965.5 | -951.7  | -3247.1 | -618.1  | -1693.7 | -951.8  | -3247.8 | -619.9  | -1697.7 |
| c3mpyr-dca-p3  | -43.7 | -37.5 | -1589.5 | -4965.9 | -951.8  | -3247.2 | -618.2  | -1694.6 | -951.9  | -3247.8 | -619.7  | -1698.4 |
| c3mpyr-dca-p4  | -45.9 | -39.7 | -1591.8 | -4965.0 | -951.9  | -3247.3 | -618.1  | -1693.5 | -952.1  | -3248.0 | -619.7  | -1697.3 |
| c3mpyr-dca-p5  | -47.8 | -41.4 | -1592.6 | -4965.8 | -951.7  | -3247.2 | -618.1  | -1693.6 | -951.9  | -3247.9 | -619.8  | -1697.5 |
| c3mpyr-mes-p1  | -48.6 | -34.3 | -1722.3 | -5383.9 | -951.5  | -3247.1 | -747.7  | -2111.3 | -951.7  | -3247.9 | -752.0  | -2120.3 |
| c3mpyr-mes-p2  | -44.4 | -31.1 | -1721.0 | -5382.3 | -952.2  | -3247.6 | -747.7  | -2111.4 | -952.3  | -3248.3 | -751.7  | -2119.8 |
| c3mpyr-mes-p3  | -43.9 | -31.1 | -1720.4 | -5381.7 | -951.7  | -3247.5 | -747.7  | -2111.3 | -951.9  | -3248.2 | -751.5  | -2119.5 |
| c3mpyr-ntf2-p1 | -55.9 | -44.6 | -3360.2 | -9675.0 | -951.9  | -3247.0 | -2382.8 | -6397.6 | -952.1  | -3247.9 | -2386.0 | -6404.5 |
| c3mpyr-ntf2-p2 | -42.4 | -33.0 | -3354.4 | -9665.4 | -951.6  | -3246.7 | -2382.6 | -6396.5 | -951.8  | -3247.4 | -2385.3 | -6402.3 |
| c3mpyr-ntf2-p3 | -53.2 | -42.3 | -3358.6 | -9673.2 | -951.6  | -3246.8 | -2382.7 | -6397.5 | -951.8  | -3247.5 | -2385.9 | -6404.3 |
| c3mpyr-ntf2-p4 | -54.2 | -43.2 | -3359.1 | -9673.8 | -951.7  | -3246.9 | -2382.7 | -6397.4 | -951.8  | -3247.6 | -2385.9 | -6404.2 |
| c3mpyr-ntf2-p5 | -44.5 | -34.3 | -3354.8 | -9666.5 | -951.4  | -3246.6 | -2382.5 | -6396.3 | -951.6  | -3247.3 | -2385.4 | -6402.6 |
| c3mpyr-ntf2-p6 | -43.7 | -33.8 | -3355.0 | -9666.5 | -951.7  | -3246.9 | -2382.6 | -6396.4 | -951.9  | -3247.6 | -2385.5 | -6402.6 |
| c3mpyr-pf6-p1  | -39.4 | -27.5 | -2165.1 | -6529.6 | -951.5  | -3246.7 | -1195.9 | -3261.2 | -951.6  | -3247.3 | -1199.6 | -3268.7 |
| c3mpyr-pf6-p2  | -36.3 | -25.2 | -2164.0 | -6528.1 | -951.7  | -3246.9 | -1196.0 | -3261.2 | -951.9  | -3247.4 | -1199.4 | -3268.2 |
| c3mpyr-pf6-p3  | -36.2 | -25.4 | -2163.8 | -6528.1 | -951.6  | -3246.9 | -1196.0 | -3261.3 | -951.7  | -3247.4 | -1199.3 | -3268.1 |
| c3mpyr-tos-p1  | -45.7 | -32.1 | -2370.2 | -7203.0 | -951.5  | -3247.1 | -1396.6 | -3932.3 | -951.7  | -3247.9 | -1400.6 | -3940.8 |
| c3mpyr-tos-p2  | -41.5 | -28.9 | -2368.8 | -7201.3 | -952.1  | -3247.5 | -1396.6 | -3932.4 | -952.3  | -3248.3 | -1400.4 | -3940.2 |
| c4mim-bf4-p1   | -40.1 | -27.4 | -1899.2 | -5666.4 | -1095.6 | -3484.5 | -785.9  | -2159.4 | -1095.9 | -3485.9 | -789.3  | -2167.0 |
| c4mim-bf4-p2   | -38.7 | -26.7 | -1898.4 | -5665.5 | -1095.5 | -3484.3 | -785.9  | -2159.4 | -1095.9 | -3485.7 | -789.1  | -2166.5 |
| c4mim-br-p1    | -51.8 | -39.8 | -1298.2 | -3945.7 | -1097.0 | -3492.8 | -177.4  | -425.0  | -1097.2 | -3493.5 | -180.6  | -432.8  |
| c4mim-br-p2    | -38.8 | -28.4 | -1293.7 | -3939.6 | -1097.7 | -3494.5 | -177.4  | -425.0  | -1097.8 | -3494.9 | -180.1  | -432.1  |
| c4mim-br-p3    | -44.0 | -32.5 | -1295.7 | -3941.8 | -1097.3 | -3493.9 | -177.4  | -425.0  | -1097.5 | -3494.3 | -180.5  | -432.8  |
| c4mim-br-p4    | -52.5 | -40.3 | -1298.7 | -3946.5 | -1097.2 | -3493.2 | -177.4  | -425.0  | -1097.4 | -3494.0 | -180.6  | -432.9  |
| c4mim-cl-p1    | -43.1 | -32.6 | -1246.1 | -3903.3 | -1096.8 | -3492.5 | -129.6  | -387.4  | -1097.0 | -3493.2 | -132.1  | -394.5  |
| c4mim-cl-p2    | -34.3 | -25.3 | -1244.2 | -3900.0 | -1097.9 | -3495.0 | -129.6  | -387.4  | -1098.0 | -3495.4 | -131.6  | -393.8  |
| c4mim-cl-p3    | -38.5 | -28.5 | -1245.6 | -3901.7 | -1097.5 | -3494.2 | -129.6  | -387.4  | -1097.6 | -3494.7 | -132.0  | -394.5  |
| c4mim-cl-p4    | -42.9 | -32.3 | -1246.1 | -3903.7 | -1097.0 | -3492.9 | -129.6  | -387.4  | -1097.2 | -3493.6 | -132.2  | -394.5  |
| c4mim-dca-p1   | -66.0 | -57.4 | -1749.9 | -5228.8 | -1095.5 | -3484.7 | -624.0  | -1708.6 | -1095.9 | -3486.1 | -625.9  | -1713.3 |



|                |       |       |         |          |         |         |         |         |         |         |         |         |
|----------------|-------|-------|---------|----------|---------|---------|---------|---------|---------|---------|---------|---------|
| c4mim-dca-p2   | -69.4 | -60.3 | -1752.0 | -5230.3  | -1095.6 | -3485.0 | -624.0  | -1708.3 | -1096.0 | -3486.4 | -626.2  | -1713.3 |
| c4mim-dca-p3   | -64.1 | -56.0 | -1748.2 | -5227.1  | -1095.0 | -3484.0 | -623.9  | -1708.3 | -1095.4 | -3485.5 | -625.7  | -1712.8 |
| c4mim-mes-p1   | -58.6 | -42.4 | -1871.7 | -5626.9  | -1096.4 | -3485.9 | -747.7  | -2110.1 | -1096.8 | -3487.3 | -752.4  | -2119.9 |
| c4mim-mes-p2   | -50.1 | -35.5 | -1866.2 | -5621.0  | -1095.2 | -3484.0 | -747.7  | -2110.2 | -1095.5 | -3485.2 | -752.0  | -2119.1 |
| c4mim-pf6-p1   | -46.9 | -32.0 | -2312.1 | -6771.4  | -1095.5 | -3484.6 | -1195.8 | -3260.8 | -1095.8 | -3485.8 | -1200.3 | -3269.7 |
| c4mim-pf6-p2   | -40.0 | -27.5 | -2308.0 | -6766.8  | -1094.8 | -3483.3 | -1195.8 | -3260.8 | -1095.1 | -3484.5 | -1199.5 | -3268.3 |
| c4mim-tos-p1   | -58.9 | -42.8 | -2521.4 | -7448.4  | -1096.3 | -3485.7 | -1397.2 | -3931.7 | -1096.7 | -3487.2 | -1401.8 | -3941.3 |
| c4mim-tos-p2   | -54.4 | -39.7 | -2519.3 | -7445.8  | -1096.2 | -3485.5 | -1397.2 | -3931.7 | -1096.6 | -3487.0 | -1401.4 | -3940.4 |
| c4mpyr-bf4-p1  | -38.6 | -27.0 | -1857.9 | -5780.6  | -1055.0 | -3601.4 | -785.5  | -2158.0 | -1055.2 | -3602.2 | -788.8  | -2165.3 |
| c4mpyr-bf4-p2  | -36.2 | -25.4 | -1857.1 | -5779.7  | -1055.3 | -3601.7 | -785.5  | -2158.0 | -1055.5 | -3602.4 | -788.6  | -2164.9 |
| c4mpyr-bf4-p3  | -36.1 | -25.5 | -1856.8 | -5779.5  | -1055.1 | -3601.7 | -785.5  | -2158.0 | -1055.3 | -3602.3 | -788.5  | -2164.7 |
| c4mpyr-br-p1   | -52.5 | -41.5 | -1257.2 | -4055.7  | -1055.7 | -3602.4 | -177.4  | -425.0  | -1055.8 | -3602.7 | -180.4  | -432.5  |
| c4mpyr-br-p2   | -50.1 | -39.3 | -1255.8 | -4054.6  | -1055.5 | -3602.5 | -177.4  | -425.0  | -1055.6 | -3602.8 | -180.3  | -432.4  |
| c4mpyr-br-p3   | -50.0 | -39.7 | -1255.9 | -4054.5  | -1055.6 | -3602.5 | -177.4  | -425.0  | -1055.7 | -3602.8 | -180.2  | -432.0  |
| c4mpyr-cl-p1   | -45.2 | -35.9 | -1205.9 | -4014.3  | -1055.7 | -3602.4 | -129.6  | -387.4  | -1055.8 | -3602.7 | -131.9  | -394.0  |
| c4mpyr-cl-p2   | -44.5 | -35.4 | -1205.5 | -4014.3  | -1055.5 | -3602.7 | -129.6  | -387.4  | -1055.6 | -3603.0 | -131.9  | -393.9  |
| c4mpyr-cl-p3   | -43.6 | -34.8 | -1205.1 | -4013.7  | -1055.6 | -3602.6 | -129.6  | -387.4  | -1055.7 | -3602.8 | -131.8  | -393.7  |
| c4mpyr-dca-p1  | -45.3 | -39.1 | -1694.4 | -5319.4  | -1055.2 | -3601.5 | -618.1  | -1693.7 | -1055.4 | -3602.3 | -619.7  | -1697.4 |
| c4mpyr-dca-p2  | -47.5 | -40.8 | -1696.1 | -5320.1  | -1055.2 | -3601.8 | -618.1  | -1693.6 | -1055.3 | -3602.5 | -619.9  | -1697.7 |
| c4mpyr-dca-p3  | -46.0 | -39.3 | -1695.6 | -5319.0  | -1055.2 | -3601.7 | -618.2  | -1693.5 | -1055.4 | -3602.4 | -620.0  | -1697.6 |
| c4mpyr-dca-p4  | -46.9 | -40.4 | -1695.4 | -5320.1  | -1055.1 | -3601.7 | -618.1  | -1693.6 | -1055.3 | -3602.5 | -619.8  | -1697.4 |
| c4mpyr-dca-p5  | -48.0 | -41.5 | -1696.1 | -5320.5  | -1055.2 | -3601.7 | -618.1  | -1693.6 | -1055.4 | -3602.4 | -619.8  | -1697.5 |
| c4mpyr-mes-p1  | -48.6 | -34.3 | -1825.8 | -5738.4  | -1055.0 | -3601.6 | -747.7  | -2111.3 | -1055.2 | -3602.4 | -752.0  | -2120.3 |
| c4mpyr-mes-p2  | -44.9 | -31.5 | -1824.7 | -5737.2  | -1055.6 | -3602.2 | -747.7  | -2111.4 | -1055.8 | -3602.9 | -751.8  | -2119.9 |
| c4mpyr-mes-p3  | -44.1 | -31.2 | -1824.0 | -5736.5  | -1055.2 | -3602.1 | -747.7  | -2111.3 | -1055.4 | -3602.8 | -751.5  | -2119.5 |
| c4mpyr-ntf2-p1 | -56.1 | -44.7 | -3463.6 | -10029.6 | -1055.3 | -3601.5 | -2382.7 | -6397.5 | -1055.5 | -3602.4 | -2386.0 | -6404.5 |
| c4mpyr-ntf2-p2 | -47.8 | -36.9 | -3460.0 | -10022.7 | -1055.0 | -3601.2 | -2382.5 | -6396.1 | -1055.2 | -3602.2 | -2385.6 | -6402.7 |
| c4mpyr-ntf2-p3 | -54.5 | -43.3 | -3462.7 | -10028.6 | -1055.1 | -3601.5 | -2382.7 | -6397.5 | -1055.2 | -3602.3 | -2386.0 | -6404.4 |
| c4mpyr-ntf2-p4 | -55.3 | -44.1 | -3463.0 | -10029.0 | -1055.1 | -3601.5 | -2382.7 | -6397.5 | -1055.3 | -3602.3 | -2386.0 | -6404.5 |
| c4mpyr-ntf2-p5 | -45.1 | -34.8 | -3458.5 | -10021.5 | -1054.8 | -3601.2 | -2382.5 | -6396.3 | -1055.0 | -3602.0 | -2385.5 | -6402.7 |
| c4mpyr-ntf2-p6 | -45.4 | -35.0 | -3459.1 | -10021.9 | -1055.2 | -3601.5 | -2382.5 | -6396.3 | -1055.4 | -3602.2 | -2385.6 | -6402.8 |
| c4mpyr-pf6-p1  | -39.5 | -27.5 | -2268.6 | -6884.3  | -1054.9 | -3601.3 | -1195.9 | -3261.2 | -1055.1 | -3601.9 | -1199.6 | -3268.8 |
| c4mpyr-pf6-p2  | -36.6 | -25.5 | -2267.6 | -6883.0  | -1055.2 | -3601.5 | -1196.0 | -3261.2 | -1055.3 | -3602.1 | -1199.4 | -3268.3 |
| c4mpyr-pf6-p3  | -36.4 | -25.5 | -2267.3 | -6882.9  | -1055.1 | -3601.5 | -1196.0 | -3261.3 | -1055.2 | -3602.0 | -1199.3 | -3268.2 |
| c4mpyr-tos-p1  | -45.9 | -32.3 | -2473.9 | -7557.8  | -1055.1 | -3601.7 | -1396.6 | -3932.4 | -1055.3 | -3602.6 | -1400.7 | -3940.9 |
| c4mpyr-tos-p2  | -42.1 | -29.4 | -2472.7 | -7556.4  | -1055.6 | -3602.2 | -1396.7 | -3932.5 | -1055.8 | -3602.9 | -1400.5 | -3940.4 |



## 2.2.9 MCCT basis set

Table S 10: Raw MCCT energies. Superscript \* indicates monomer calculated in the dimer basis set.

| ion pair       | E(int) | E(int) CP | E(dimer) SS | E(dimer) OS | E(A) SS | E(A) OS | E(B) SS | E(B) OS | E(A) SS* | E(A) OS* | E(B) SS* | E(B) OS* |
|----------------|--------|-----------|-------------|-------------|---------|---------|---------|---------|----------|----------|----------|----------|
| c1mim-bf4-p1   | -31.8  | -24.7     | -1589.2     | -4610.2     | -783.5  | -2421.8 | -791.6  | -2170.7 | -783.9   | -2423.5  | -792.8   | -2174.5  |
| c1mim-br-p1    | -50.2  | -37.6     | -987.1      | -2883.8     | -785.5  | -2429.6 | -178.4  | -427.2  | -785.7   | -2430.4  | -181.8   | -435.4   |
| c1mim-br-p2    | -33.8  | -23.3     | -980.0      | -2874.2     | -785.2  | -2429.6 | -178.4  | -427.2  | -785.3   | -2430.0  | -181.3   | -434.4   |
| c1mim-cl-p1    | -39.3  | -29.9     | -935.1      | -2841.8     | -785.3  | -2429.3 | -131.4  | -391.6  | -785.5   | -2430.0  | -133.6   | -397.8   |
| c1mim-cl-p2    | -28.9  | -20.8     | -931.5      | -2836.0     | -785.4  | -2430.2 | -131.4  | -391.6  | -785.5   | -2430.6  | -133.2   | -397.3   |
| c1mim-dca-p1   | -62.0  | -54.4     | -1439.4     | -4169.7     | -784.0  | -2423.1 | -626.9  | -1713.2 | -784.4   | -2424.7  | -628.2   | -1717.5  |
| c1mim-dca-p2   | -46.0  | -39.8     | -1432.4     | -4161.8     | -784.1  | -2424.2 | -626.5  | -1713.3 | -784.3   | -2425.2  | -627.7   | -1717.3  |
| c1mim-mes-p1   | -43.5  | -34.0     | -1559.1     | -4567.3     | -784.0  | -2422.7 | -754.1  | -2122.0 | -784.4   | -2424.2  | -756.2   | -2127.5  |
| c1mim-ntf2-p1  | -72.4  | -60.1     | -3212.6     | -8885.1     | -783.5  | -2421.9 | -2396.7 | -6423.2 | -784.2   | -2424.6  | -2398.9  | -6429.9  |
| c1mim-ntf2-p2  | -40.8  | -31.8     | -3199.1     | -8866.7     | -783.8  | -2423.7 | -2396.0 | -6421.5 | -784.2   | -2425.2  | -2397.7  | -6426.9  |
| c1mim-ntf2-p3  | -43.0  | -33.4     | -3200.9     | -8867.2     | -783.6  | -2422.7 | -2396.6 | -6422.1 | -784.1   | -2424.8  | -2398.4  | -6427.5  |
| c1mim-pf6-p1   | -35.3  | -26.5     | -2003.7     | -5719.6     | -783.5  | -2421.9 | -1204.5 | -3278.1 | -783.9   | -2423.5  | -1206.4  | -3283.0  |
| c1mim-tos-p1   | -41.7  | -32.6     | -2207.8     | -6389.1     | -783.7  | -2422.4 | -1404.1 | -3945.1 | -784.1   | -2424.1  | -1405.9  | -3950.2  |
| c1mpyr-bf4-p1  | -31.5  | -25.2     | -1547.2     | -4720.9     | -741.3  | -2534.9 | -791.2  | -2169.2 | -741.5   | -2536.0  | -792.4   | -2173.0  |
| c1mpyr-bf4-p2  | -28.9  | -23.3     | -1546.1     | -4719.8     | -741.5  | -2535.1 | -791.2  | -2169.2 | -741.6   | -2536.0  | -792.3   | -2172.7  |
| c1mpyr-br-p1   | -50.9  | -39.3     | -943.9      | -2990.6     | -742.0  | -2536.0 | -178.4  | -427.2  | -742.1   | -2536.3  | -181.7   | -435.1   |
| c1mpyr-br-p2   | -48.3  | -37.4     | -942.7      | -2989.4     | -742.0  | -2536.2 | -178.4  | -427.2  | -742.0   | -2536.5  | -181.5   | -434.7   |
| c1mpyr-cl-p1   | -42.3  | -33.8     | -893.3      | -2950.1     | -742.0  | -2536.1 | -131.4  | -391.6  | -742.1   | -2536.4  | -133.5   | -397.6   |
| c1mpyr-cl-p2   | -41.0  | -32.7     | -892.6      | -2949.6     | -742.0  | -2536.2 | -131.4  | -391.6  | -742.1   | -2536.5  | -133.5   | -397.4   |
| c1mpyr-dca-p1  | -42.8  | -37.1     | -1383.4     | -4256.1     | -741.9  | -2535.7 | -620.9  | -1698.4 | -742.0   | -2536.5  | -622.0   | -1702.0  |
| c1mpyr-dca-p2  | -46.3  | -40.7     | -1384.5     | -4258.5     | -741.7  | -2535.4 | -620.8  | -1698.7 | -741.9   | -2536.2  | -622.0   | -1702.3  |
| c1mpyr-dca-p3  | -43.5  | -38.2     | -1381.6     | -4258.6     | -741.4  | -2535.2 | -620.8  | -1699.3 | -741.6   | -2536.0  | -621.7   | -1702.6  |
| c1mpyr-dca-p4  | -45.0  | -39.2     | -1383.5     | -4257.6     | -741.4  | -2535.2 | -620.9  | -1698.7 | -741.6   | -2536.0  | -622.0   | -1702.3  |
| c1mpyr-mes-p1  | -39.8  | -31.2     | -1515.2     | -4678.5     | -741.3  | -2535.2 | -754.1  | -2123.2 | -741.5   | -2536.2  | -756.1   | -2128.6  |
| c1mpyr-mes-p2  | -35.5  | -27.5     | -1513.3     | -4676.6     | -741.5  | -2535.6 | -754.1  | -2123.2 | -741.7   | -2536.4  | -756.0   | -2128.4  |
| c1mpyr-ntf2-p1 | -49.3  | -40.8     | -3159.2     | -8984.7     | -741.6  | -2535.0 | -2395.4 | -6422.6 | -741.9   | -2536.3  | -2397.1  | -6427.8  |
| c1mpyr-ntf2-p2 | -37.7  | -30.0     | -3154.3     | -8976.3     | -741.4  | -2534.8 | -2395.3 | -6421.6 | -741.7   | -2536.1  | -2396.8  | -6426.1  |
| c1mpyr-ntf2-p3 | -47.9  | -39.6     | -3158.6     | -8983.7     | -741.6  | -2535.2 | -2395.3 | -6422.4 | -741.9   | -2536.4  | -2396.9  | -6427.5  |
| c1mpyr-ntf2-p5 | -38.6  | -31.0     | -3155.0     | -8976.7     | -741.6  | -2535.0 | -2395.2 | -6421.3 | -741.8   | -2536.2  | -2396.7  | -6425.9  |
| c1mpyr-pf6-p1  | -32.4  | -25.0     | -1960.9     | -5830.8     | -741.3  | -2534.9 | -1204.6 | -3278.5 | -741.5   | -2535.8  | -1206.4  | -3283.0  |
| c1mpyr-pf6-p2  | -29.8  | -23.0     | -1959.8     | -5829.6     | -741.4  | -2535.0 | -1204.7 | -3278.6 | -741.6   | -2535.8  | -1206.3  | -3282.8  |
| c1mpyr-tos-p1  | -37.6  | -29.4     | -2163.7     | -6499.6     | -741.3  | -2535.3 | -1403.4 | -3945.6 | -741.6   | -2536.3  | -1405.2  | -3950.7  |
| c1mpyr-tos-p2  | -33.1  | -25.4     | -2161.2     | -6497.5     | -741.5  | -2535.4 | -1403.3 | -3945.5 | -741.7   | -2536.3  | -1405.1  | -3950.4  |



|               |       |       |         |         |        |         |         |         |        |         |         |         |
|---------------|-------|-------|---------|---------|--------|---------|---------|---------|--------|---------|---------|---------|
| c2mim-bf4-p1  | -33.8 | -26.2 | -1695.5 | -4966.9 | -888.7 | -2777.6 | -791.5  | -2170.7 | -889.2 | -2779.4 | -792.8  | -2174.8 |
| c2mim-bf4-p2  | -31.6 | -24.4 | -1693.9 | -4965.2 | -888.3 | -2777.0 | -791.6  | -2170.8 | -888.7 | -2778.7 | -792.8  | -2174.6 |
| c2mim-br-p1   | -52.2 | -38.8 | -1092.6 | -3240.2 | -890.2 | -2784.8 | -178.4  | -427.2  | -890.4 | -2785.6 | -182.1  | -436.0  |
| c2mim-br-p2   | -38.0 | -26.5 | -1087.9 | -3233.6 | -891.1 | -2786.8 | -178.4  | -427.2  | -891.2 | -2787.2 | -181.5  | -435.0  |
| c2mim-br-p3   | -38.3 | -26.9 | -1087.2 | -3232.9 | -890.3 | -2785.8 | -178.4  | -427.2  | -890.4 | -2786.2 | -181.5  | -435.0  |
| c2mim-br-p4   | -52.0 | -39.0 | -1093.2 | -3241.1 | -890.8 | -2785.9 | -178.4  | -427.2  | -891.0 | -2786.7 | -182.0  | -435.7  |
| c2mim-cl-p1   | -41.4 | -31.4 | -1040.8 | -3198.4 | -890.1 | -2784.7 | -131.4  | -391.6  | -890.3 | -2785.4 | -133.8  | -398.3  |
| c2mim-cl-p2   | -31.6 | -22.9 | -1038.6 | -3194.7 | -891.4 | -2787.3 | -131.4  | -391.6  | -891.5 | -2787.8 | -133.4  | -397.7  |
| c2mim-cl-p3   | -32.2 | -23.4 | -1038.0 | -3194.0 | -890.6 | -2786.3 | -131.4  | -391.6  | -890.7 | -2786.8 | -133.5  | -397.8  |
| c2mim-cl-p4   | -40.6 | -30.9 | -1040.9 | -3198.7 | -890.6 | -2785.5 | -131.4  | -391.6  | -890.7 | -2786.3 | -133.7  | -398.0  |
| c2mim-dca-p1  | -63.9 | -56.0 | -1544.7 | -4526.1 | -888.6 | -2777.9 | -626.7  | -1713.6 | -889.0 | -2779.6 | -628.1  | -1718.1 |
| c2mim-dca-p2  | -59.9 | -52.3 | -1543.3 | -4523.7 | -888.8 | -2778.0 | -626.8  | -1713.5 | -889.2 | -2779.6 | -628.1  | -1717.7 |
| c2mim-dca-p3  | -64.0 | -56.2 | -1545.8 | -4526.5 | -889.3 | -2778.6 | -626.9  | -1713.4 | -889.7 | -2780.2 | -628.3  | -1717.9 |
| c2mim-dca-p4  | -60.8 | -53.3 | -1543.5 | -4524.2 | -888.7 | -2778.0 | -626.8  | -1713.4 | -889.1 | -2779.6 | -628.1  | -1717.7 |
| c2mim-dca-p5  | -62.4 | -54.6 | -1544.3 | -4525.1 | -888.7 | -2778.1 | -626.9  | -1713.2 | -889.1 | -2779.8 | -628.2  | -1717.7 |
| c2mim-dca-p6  | -62.7 | -55.0 | -1544.1 | -4525.3 | -888.6 | -2777.8 | -626.9  | -1713.4 | -889.0 | -2779.4 | -628.2  | -1717.8 |
| c2mim-mes-p1  | -49.3 | -39.0 | -1667.2 | -4926.4 | -889.5 | -2778.8 | -754.1  | -2121.9 | -889.9 | -2780.5 | -756.3  | -2127.9 |
| c2mim-mes-p2  | -44.5 | -34.5 | -1664.0 | -4923.0 | -888.6 | -2777.6 | -754.2  | -2122.0 | -889.0 | -2779.2 | -756.3  | -2127.9 |
| c2mim-ntf2-p1 | -79.4 | -65.4 | -3321.0 | -9244.8 | -888.8 | -2777.7 | -2396.7 | -6423.1 | -889.5 | -2780.7 | -2399.3 | -6430.9 |
| c2mim-ntf2-p2 | -51.3 | -40.6 | -3309.2 | -9229.2 | -889.1 | -2779.4 | -2396.3 | -6422.4 | -889.5 | -2781.2 | -2398.4 | -6428.8 |
| c2mim-ntf2-p3 | -46.5 | -36.0 | -3307.6 | -9224.4 | -888.6 | -2778.2 | -2396.6 | -6422.1 | -889.1 | -2780.4 | -2398.6 | -6427.9 |
| c2mim-ntf2-p4 | -69.4 | -56.9 | -3317.0 | -9239.3 | -888.7 | -2777.7 | -2397.0 | -6423.5 | -889.4 | -2780.4 | -2399.3 | -6430.3 |
| c2mim-pf6-p1  | -39.0 | -29.4 | -2110.6 | -6077.1 | -888.6 | -2777.6 | -1204.5 | -3278.1 | -889.1 | -2779.3 | -1206.6 | -3283.4 |
| c2mim-pf6-p2  | -35.9 | -26.7 | -2108.6 | -6075.1 | -888.3 | -2776.9 | -1204.5 | -3278.1 | -888.7 | -2778.6 | -1206.5 | -3283.2 |
| c2mim-tos-p1  | -49.1 | -38.8 | -2316.9 | -6749.1 | -889.3 | -2778.6 | -1404.0 | -3944.9 | -889.8 | -2780.5 | -1406.1 | -3950.8 |
| c2mim-tos-p2  | -43.3 | -33.5 | -2313.4 | -6745.2 | -888.6 | -2777.7 | -1404.0 | -3945.1 | -889.1 | -2779.5 | -1406.0 | -3950.6 |
| c2mpyr-bf4-p1 | -32.3 | -25.7 | -1654.3 | -5079.9 | -848.2 | -2893.4 | -791.2  | -2169.2 | -848.5 | -2894.5 | -792.4  | -2173.2 |
| c2mpyr-bf4-p2 | -30.4 | -24.2 | -1654.0 | -5079.3 | -848.7 | -2893.8 | -791.2  | -2169.3 | -848.9 | -2894.8 | -792.4  | -2173.1 |
| c2mpyr-bf4-p3 | -30.1 | -23.9 | -1653.4 | -5078.9 | -848.3 | -2893.6 | -791.2  | -2169.2 | -848.5 | -2894.5 | -792.4  | -2173.0 |
| c2mpyr-br-p1  | -52.5 | -40.2 | -1051.4 | -3349.9 | -848.8 | -2894.3 | -178.4  | -427.2  | -848.9 | -2894.7 | -181.8  | -435.5  |
| c2mpyr-br-p2  | -50.6 | -38.7 | -1050.5 | -3349.4 | -848.8 | -2894.9 | -178.4  | -427.2  | -848.9 | -2895.2 | -181.8  | -435.3  |
| c2mpyr-br-p3  | -49.7 | -38.2 | -1050.0 | -3348.5 | -848.7 | -2894.4 | -178.4  | -427.2  | -848.8 | -2894.8 | -181.6  | -435.1  |
| c2mpyr-cl-p1  | -43.4 | -34.3 | -1000.5 | -3309.2 | -848.9 | -2894.4 | -131.4  | -391.6  | -849.0 | -2894.8 | -133.6  | -397.9  |
| c2mpyr-cl-p2  | -42.2 | -33.4 | -999.7  | -3308.7 | -848.6 | -2894.6 | -131.4  | -391.6  | -848.7 | -2894.9 | -133.6  | -397.8  |
| c2mpyr-cl-p3  | -41.7 | -33.1 | -999.7  | -3308.4 | -848.9 | -2894.6 | -131.4  | -391.6  | -848.9 | -2894.9 | -133.5  | -397.6  |
| c2mpyr-dca-p1 | -43.1 | -37.3 | -1490.4 | -4614.8 | -848.7 | -2894.0 | -620.9  | -1698.4 | -848.9 | -2894.9 | -622.0  | -1702.1 |
| c2mpyr-dca-p2 | -46.6 | -40.4 | -1491.5 | -4616.9 | -848.3 | -2893.7 | -620.9  | -1698.8 | -848.6 | -2894.6 | -622.2  | -1702.6 |
| c2mpyr-dca-p3 | -46.9 | -41.0 | -1491.4 | -4617.2 | -848.4 | -2893.8 | -620.9  | -1698.7 | -848.6 | -2894.6 | -622.0  | -1702.3 |
| c2mpyr-mes-p1 | -41.6 | -32.4 | -1622.7 | -5038.1 | -848.2 | -2893.7 | -754.1  | -2123.2 | -848.5 | -2894.7 | -756.3  | -2129.0 |



|                |       |       |         |         |        |         |         |         |        |         |         |         |
|----------------|-------|-------|---------|---------|--------|---------|---------|---------|--------|---------|---------|---------|
| c2mpyr-mes-p2  | -38.2 | -29.6 | -1621.7 | -5037.0 | -848.9 | -2894.2 | -754.2  | -2123.3 | -849.1 | -2895.1 | -756.2  | -2128.8 |
| c2mpyr-mes-p3  | -37.5 | -28.8 | -1620.9 | -5036.3 | -848.4 | -2894.1 | -754.1  | -2123.2 | -848.6 | -2894.9 | -756.2  | -2128.8 |
| c2mpyr-ntf2-p1 | -50.8 | -41.7 | -3267.0 | -9343.9 | -848.5 | -2893.3 | -2395.5 | -6422.7 | -848.9 | -2894.8 | -2397.3 | -6428.2 |
| c2mpyr-ntf2-p2 | -40.1 | -31.9 | -3262.3 | -9336.2 | -848.2 | -2893.2 | -2395.3 | -6421.7 | -848.5 | -2894.6 | -2396.9 | -6426.6 |
| c2mpyr-ntf2-p3 | -49.7 | -40.8 | -3266.3 | -9343.2 | -848.4 | -2893.4 | -2395.4 | -6422.6 | -848.7 | -2894.8 | -2397.3 | -6428.0 |
| c2mpyr-ntf2-p4 | -48.8 | -40.1 | -3265.8 | -9342.9 | -848.3 | -2893.4 | -2395.4 | -6422.7 | -848.6 | -2894.7 | -2397.2 | -6428.1 |
| c2mpyr-ntf2-p5 | -41.4 | -33.3 | -3262.7 | -9336.7 | -848.0 | -2893.2 | -2395.2 | -6421.5 | -848.4 | -2894.5 | -2396.8 | -6426.4 |
| c2mpyr-ntf2-p6 | -38.9 | -31.2 | -3262.1 | -9335.7 | -848.4 | -2893.4 | -2395.4 | -6421.7 | -848.7 | -2894.7 | -2396.9 | -6426.3 |
| c2mpyr-pf6-p1  | -33.4 | -25.4 | -2068.4 | -6190.0 | -848.4 | -2893.5 | -1204.6 | -3278.5 | -848.6 | -2894.5 | -1206.5 | -3283.3 |
| c2mpyr-pf6-p2  | -31.3 | -24.0 | -2067.5 | -6189.0 | -848.4 | -2893.5 | -1204.7 | -3278.6 | -848.7 | -2894.5 | -1206.4 | -3283.1 |
| c2mpyr-pf6-p3  | -30.8 | -23.5 | -2067.1 | -6188.7 | -848.3 | -2893.4 | -1204.7 | -3278.6 | -848.5 | -2894.3 | -1206.4 | -3283.1 |
| c2mpyr-tos-p1  | -39.7 | -30.7 | -2271.3 | -6859.3 | -848.2 | -2893.6 | -1403.5 | -3945.7 | -848.5 | -2894.9 | -1405.4 | -3951.2 |
| c2mpyr-tos-p2  | -36.5 | -28.0 | -2270.3 | -6858.2 | -848.8 | -2894.2 | -1403.4 | -3945.6 | -849.1 | -2895.2 | -1405.3 | -3950.9 |
| c3mim-bf4-p1   | -34.7 | -26.8 | -1799.8 | -5322.1 | -992.6 | -3132.3 | -791.6  | -2170.7 | -993.0 | -3134.1 | -792.9  | -2175.0 |
| c3mim-bf4-p2   | -33.8 | -26.2 | -1799.3 | -5321.7 | -992.6 | -3132.3 | -791.6  | -2170.8 | -993.0 | -3134.1 | -792.8  | -2174.9 |
| c3mim-br-p1    | -53.2 | -39.4 | -1196.9 | -3596.0 | -994.0 | -3140.0 | -178.4  | -427.2  | -994.2 | -3140.8 | -182.2  | -436.2  |
| c3mim-br-p2    | -38.6 | -26.9 | -1191.7 | -3588.9 | -994.7 | -3141.7 | -178.4  | -427.2  | -994.8 | -3142.2 | -181.6  | -435.2  |
| c3mim-br-p3    | -42.9 | -30.5 | -1193.3 | -3590.6 | -994.3 | -3141.1 | -178.4  | -427.2  | -994.4 | -3141.6 | -181.8  | -435.6  |
| c3mim-br-p4    | -54.2 | -40.1 | -1197.6 | -3597.1 | -994.3 | -3140.7 | -178.4  | -427.2  | -994.5 | -3141.5 | -182.2  | -436.4  |
| c3mim-cl-p1    | -42.1 | -31.8 | -1144.9 | -3553.9 | -993.9 | -3139.8 | -131.4  | -391.6  | -994.1 | -3140.5 | -133.8  | -398.4  |
| c3mim-cl-p2    | -31.9 | -23.0 | -1142.3 | -3549.8 | -995.0 | -3142.3 | -131.4  | -391.6  | -995.1 | -3142.8 | -133.4  | -397.8  |
| c3mim-cl-p3    | -35.4 | -26.1 | -1143.4 | -3551.0 | -994.5 | -3141.5 | -131.4  | -391.6  | -994.6 | -3142.0 | -133.6  | -398.1  |
| c3mim-cl-p4    | -41.9 | -31.7 | -1144.9 | -3554.4 | -994.1 | -3140.3 | -131.4  | -391.6  | -994.3 | -3141.1 | -133.8  | -398.4  |
| c3mim-dca-p1   | -65.0 | -56.8 | -1648.9 | -4881.3 | -992.4 | -3132.4 | -626.8  | -1713.7 | -992.8 | -3134.1 | -628.2  | -1718.3 |
| c3mim-dca-p2   | -66.1 | -57.9 | -1649.8 | -4882.5 | -992.8 | -3133.1 | -626.8  | -1713.5 | -993.3 | -3134.9 | -628.2  | -1718.0 |
| c3mim-dca-p3   | -56.3 | -49.0 | -1645.8 | -4877.6 | -992.9 | -3133.9 | -626.6  | -1713.6 | -993.2 | -3135.2 | -627.9  | -1718.0 |
| c3mim-dca-p4   | -67.2 | -59.0 | -1650.5 | -4882.2 | -992.6 | -3132.7 | -626.8  | -1713.3 | -993.0 | -3134.4 | -628.2  | -1718.0 |
| c3mim-dca-p5   | -63.9 | -55.9 | -1647.8 | -4880.2 | -992.0 | -3131.9 | -626.7  | -1713.4 | -992.4 | -3133.7 | -628.0  | -1717.8 |
| c3mim-dca-p6   | -63.0 | -55.1 | -1647.6 | -4879.9 | -992.1 | -3132.0 | -626.9  | -1713.4 | -992.5 | -3133.7 | -628.3  | -1717.9 |
| c3mim-mes-p1   | -52.0 | -41.1 | -1772.5 | -5282.7 | -993.4 | -3133.7 | -754.1  | -2121.9 | -993.8 | -3135.5 | -756.4  | -2128.4 |
| c3mim-mes-p2   | -45.2 | -34.9 | -1767.8 | -5277.8 | -992.3 | -3131.9 | -754.2  | -2122.1 | -992.7 | -3133.6 | -756.4  | -2128.0 |
| c3mim-ntf2-p1  | -83.4 | -68.4 | -3426.6 | -9601.7 | -992.6 | -3132.4 | -2396.7 | -6423.2 | -993.4 | -3135.5 | -2399.5 | -6431.5 |
| c3mim-ntf2-p2  | -55.7 | -44.2 | -3415.0 | -9586.0 | -992.8 | -3133.8 | -2396.3 | -6422.4 | -993.3 | -3135.8 | -2398.6 | -6429.3 |
| c3mim-ntf2-p3  | -48.5 | -37.5 | -3412.3 | -9580.2 | -992.3 | -3132.8 | -2396.7 | -6422.1 | -992.9 | -3135.1 | -2398.7 | -6428.3 |
| c3mim-ntf2-p4  | -70.8 | -58.4 | -3420.7 | -9594.4 | -992.2 | -3131.6 | -2397.0 | -6423.5 | -992.8 | -3134.4 | -2399.2 | -6430.3 |
| c3mim-pf6-p1   | -40.0 | -30.5 | -2214.4 | -6432.1 | -992.3 | -3131.9 | -1204.4 | -3277.9 | -992.7 | -3133.7 | -1206.5 | -3283.2 |
| c3mim-pf6-p2   | -36.1 | -26.8 | -2212.3 | -6429.6 | -991.9 | -3131.3 | -1204.5 | -3278.1 | -992.3 | -3133.0 | -1206.5 | -3283.3 |
| c3mim-tos-p1   | -52.4 | -41.4 | -2422.3 | -7105.7 | -993.2 | -3133.4 | -1404.0 | -3945.0 | -993.7 | -3135.5 | -1406.2 | -3951.2 |
| c3mim-tos-p2   | -49.4 | -39.0 | -2420.5 | -7103.7 | -992.8 | -3132.8 | -1404.1 | -3945.1 | -993.3 | -3134.8 | -1406.1 | -3951.0 |



|                |       |       |         |         |         |         |         |         |         |         |         |         |
|----------------|-------|-------|---------|---------|---------|---------|---------|---------|---------|---------|---------|---------|
| c3mpyr-bf4-p1  | -32.8 | -26.0 | -1758.2 | -5435.4 | -951.9  | -3248.6 | -791.2  | -2169.2 | -952.2  | -3249.8 | -792.4  | -2173.2 |
| c3mpyr-bf4-p2  | -30.6 | -24.2 | -1757.6 | -5434.6 | -952.3  | -3248.9 | -791.2  | -2169.2 | -952.5  | -3250.0 | -792.4  | -2173.1 |
| c3mpyr-bf4-p3  | -30.5 | -24.2 | -1757.3 | -5434.4 | -952.0  | -3248.8 | -791.2  | -2169.2 | -952.2  | -3249.8 | -792.4  | -2173.1 |
| c3mpyr-br-p1   | -53.6 | -41.0 | -1155.6 | -3705.7 | -952.6  | -3249.5 | -178.4  | -427.2  | -952.7  | -3250.0 | -181.9  | -435.7  |
| c3mpyr-br-p2   | -50.8 | -38.5 | -1154.1 | -3704.4 | -952.4  | -3249.6 | -178.4  | -427.2  | -952.5  | -3250.1 | -181.8  | -435.5  |
| c3mpyr-br-p3   | -50.8 | -38.9 | -1154.2 | -3704.3 | -952.5  | -3249.7 | -178.4  | -427.2  | -952.6  | -3250.1 | -181.7  | -435.3  |
| c3mpyr-cl-p1   | -44.0 | -34.7 | -1104.5 | -3664.7 | -952.6  | -3249.6 | -131.4  | -391.6  | -952.7  | -3250.0 | -133.7  | -398.0  |
| c3mpyr-cl-p2   | -42.7 | -33.6 | -1103.6 | -3664.2 | -952.4  | -3249.7 | -131.4  | -391.6  | -952.5  | -3250.1 | -133.6  | -397.9  |
| c3mpyr-cl-p3   | -42.2 | -33.4 | -1103.6 | -3663.9 | -952.6  | -3249.8 | -131.4  | -391.6  | -952.6  | -3250.1 | -133.6  | -397.8  |
| c3mpyr-dca-p1  | -44.4 | -38.4 | -1594.5 | -4970.6 | -952.2  | -3249.0 | -621.0  | -1698.6 | -952.4  | -3249.9 | -622.1  | -1702.3 |
| c3mpyr-dca-p2  | -46.7 | -40.4 | -1595.2 | -4972.2 | -952.0  | -3248.9 | -620.9  | -1698.8 | -952.3  | -3249.8 | -622.2  | -1702.7 |
| c3mpyr-dca-p3  | -42.6 | -37.2 | -1592.0 | -4972.3 | -952.1  | -3248.9 | -621.0  | -1699.6 | -952.4  | -3249.9 | -621.9  | -1702.9 |
| c3mpyr-dca-p4  | -45.1 | -39.3 | -1594.4 | -4971.6 | -952.3  | -3249.1 | -620.8  | -1698.7 | -952.5  | -3250.0 | -622.0  | -1702.3 |
| c3mpyr-dca-p5  | -47.0 | -41.0 | -1595.1 | -4972.4 | -952.1  | -3248.9 | -620.9  | -1698.7 | -952.3  | -3249.8 | -622.0  | -1702.4 |
| c3mpyr-mes-p1  | -42.6 | -33.1 | -1726.8 | -5393.9 | -951.9  | -3248.8 | -754.1  | -2123.2 | -952.2  | -3250.0 | -756.3  | -2129.1 |
| c3mpyr-mes-p2  | -38.7 | -29.8 | -1725.6 | -5392.5 | -952.6  | -3249.3 | -754.2  | -2123.3 | -952.8  | -3250.4 | -756.2  | -2128.9 |
| c3mpyr-mes-p3  | -38.4 | -29.5 | -1725.0 | -5392.1 | -952.1  | -3249.3 | -754.1  | -2123.2 | -952.3  | -3250.2 | -756.2  | -2128.9 |
| c3mpyr-ntf2-p1 | -53.0 | -43.5 | -3371.7 | -9700.6 | -952.3  | -3248.8 | -2395.5 | -6422.7 | -952.7  | -3250.4 | -2397.4 | -6428.4 |
| c3mpyr-ntf2-p2 | -40.3 | -32.0 | -3366.3 | -9691.4 | -952.0  | -3248.5 | -2395.3 | -6421.6 | -952.3  | -3249.9 | -2396.9 | -6426.6 |
| c3mpyr-ntf2-p3 | -50.2 | -41.0 | -3370.2 | -9698.7 | -952.0  | -3248.5 | -2395.5 | -6422.7 | -952.3  | -3250.0 | -2397.3 | -6428.2 |
| c3mpyr-ntf2-p4 | -51.1 | -41.8 | -3370.5 | -9699.2 | -952.0  | -3248.7 | -2395.4 | -6422.5 | -952.4  | -3250.1 | -2397.3 | -6428.2 |
| c3mpyr-ntf2-p5 | -41.6 | -33.2 | -3366.4 | -9692.0 | -951.7  | -3248.3 | -2395.2 | -6421.5 | -952.1  | -3249.8 | -2396.8 | -6426.5 |
| c3mpyr-ntf2-p6 | -40.8 | -32.6 | -3366.5 | -9691.9 | -952.1  | -3248.7 | -2395.3 | -6421.6 | -952.4  | -3250.0 | -2396.9 | -6426.5 |
| c3mpyr-pf6-p1  | -34.4 | -26.2 | -2172.2 | -6545.6 | -951.8  | -3248.4 | -1204.6 | -3278.5 | -952.1  | -3249.6 | -1206.5 | -3283.4 |
| c3mpyr-pf6-p2  | -31.5 | -23.9 | -2171.2 | -6544.3 | -952.1  | -3248.6 | -1204.6 | -3278.6 | -952.3  | -3249.6 | -1206.4 | -3283.1 |
| c3mpyr-pf6-p3  | -31.5 | -24.0 | -2171.0 | -6544.3 | -951.9  | -3248.6 | -1204.7 | -3278.6 | -952.2  | -3249.5 | -1206.5 | -3283.2 |
| c3mpyr-tos-p1  | -41.0 | -31.6 | -2375.4 | -7215.2 | -951.9  | -3248.8 | -1403.3 | -3945.5 | -952.2  | -3250.1 | -1405.4 | -3951.3 |
| c3mpyr-tos-p2  | -37.1 | -28.3 | -2374.1 | -7213.7 | -952.5  | -3249.3 | -1403.3 | -3945.6 | -952.8  | -3250.5 | -1405.3 | -3950.9 |
| c4mim-bf4-p1   | -35.3 | -27.3 | -1903.7 | -5677.0 | -1096.2 | -3486.9 | -791.6  | -2170.7 | -1096.7 | -3488.8 | -792.9  | -2175.1 |
| c4mim-bf4-p2   | -34.1 | -26.4 | -1903.0 | -5676.3 | -1096.2 | -3486.7 | -791.6  | -2170.8 | -1096.6 | -3488.5 | -792.9  | -2175.0 |
| c4mim-br-p1    | -54.4 | -40.3 | -1301.0 | -3951.8 | -1097.6 | -3495.2 | -178.4  | -427.2  | -1097.8 | -3496.0 | -182.3  | -436.5  |
| c4mim-br-p2    | -39.7 | -27.7 | -1295.9 | -3944.7 | -1098.4 | -3496.9 | -178.4  | -427.2  | -1098.5 | -3497.4 | -181.7  | -435.4  |
| c4mim-br-p3    | -45.0 | -32.1 | -1297.9 | -3946.9 | -1098.0 | -3496.2 | -178.4  | -427.2  | -1098.1 | -3496.7 | -181.9  | -435.9  |
| c4mim-br-p4    | -54.9 | -40.6 | -1301.4 | -3952.5 | -1097.8 | -3495.6 | -178.4  | -427.2  | -1098.0 | -3496.5 | -182.3  | -436.5  |
| c4mim-cl-p1    | -42.8 | -32.4 | -1248.8 | -3909.4 | -1097.5 | -3494.9 | -131.4  | -391.6  | -1097.7 | -3495.6 | -133.9  | -398.6  |
| c4mim-cl-p2    | -32.6 | -23.5 | -1246.3 | -3905.3 | -1098.6 | -3497.4 | -131.4  | -391.6  | -1098.7 | -3497.9 | -133.5  | -397.9  |
| c4mim-cl-p3    | -36.9 | -27.2 | -1247.7 | -3906.9 | -1098.1 | -3496.6 | -131.4  | -391.6  | -1098.2 | -3497.1 | -133.7  | -398.4  |
| c4mim-cl-p4    | -42.5 | -32.1 | -1248.7 | -3909.7 | -1097.6 | -3495.3 | -131.4  | -391.6  | -1097.8 | -3496.1 | -133.8  | -398.6  |
| c4mim-dca-p1   | -65.8 | -57.5 | -1753.0 | -5236.4 | -1096.1 | -3487.0 | -626.8  | -1713.7 | -1096.5 | -3488.8 | -628.2  | -1718.4 |



|                |       |       |         |          |         |         |         |         |         |         |         |         |
|----------------|-------|-------|---------|----------|---------|---------|---------|---------|---------|---------|---------|---------|
| c4mim-dca-p2   | -69.0 | -60.4 | -1755.0 | -5237.8  | -1096.3 | -3487.3 | -626.8  | -1713.4 | -1096.7 | -3489.1 | -628.3  | -1718.2 |
| c4mim-dca-p3   | -64.4 | -56.2 | -1751.5 | -5235.0  | -1095.6 | -3486.4 | -626.7  | -1713.4 | -1096.1 | -3488.2 | -628.1  | -1717.9 |
| c4mim-mes-p1   | -53.4 | -42.1 | -1876.7 | -5638.0  | -1097.1 | -3488.2 | -754.1  | -2121.9 | -1097.5 | -3490.1 | -756.5  | -2128.6 |
| c4mim-mes-p2   | -45.4 | -35.0 | -1871.4 | -5632.3  | -1095.8 | -3486.3 | -754.2  | -2122.1 | -1096.2 | -3488.0 | -756.4  | -2128.1 |
| c4mim-pf6-p1   | -42.0 | -31.6 | -2319.5 | -6788.1  | -1096.2 | -3486.9 | -1204.5 | -3278.1 | -1096.6 | -3488.8 | -1206.7 | -3283.9 |
| c4mim-pf6-p2   | -36.3 | -26.9 | -2315.9 | -6784.2  | -1095.4 | -3485.7 | -1204.5 | -3278.1 | -1095.9 | -3487.4 | -1206.6 | -3283.4 |
| c4mim-tos-p1   | -54.7 | -43.3 | -2527.1 | -7461.7  | -1096.9 | -3488.1 | -1404.0 | -3945.0 | -1097.5 | -3490.2 | -1406.3 | -3951.5 |
| c4mim-tos-p2   | -50.6 | -40.0 | -2525.2 | -7459.3  | -1096.9 | -3487.9 | -1404.0 | -3945.0 | -1097.4 | -3489.8 | -1406.1 | -3951.1 |
| c4mpyr-bf4-p1  | -33.0 | -26.1 | -1861.8 | -5790.3  | -1055.4 | -3603.4 | -791.2  | -2169.2 | -1055.7 | -3604.6 | -792.4  | -2173.3 |
| c4mpyr-bf4-p2  | -30.9 | -24.4 | -1861.2 | -5789.6  | -1055.8 | -3603.7 | -791.2  | -2169.2 | -1056.0 | -3604.8 | -792.4  | -2173.2 |
| c4mpyr-bf4-p3  | -30.8 | -24.4 | -1860.9 | -5789.5  | -1055.5 | -3603.6 | -791.2  | -2169.2 | -1055.8 | -3604.6 | -792.4  | -2173.2 |
| c4mpyr-br-p1   | -54.0 | -41.2 | -1259.3 | -4060.8  | -1056.1 | -3604.3 | -178.4  | -427.2  | -1056.2 | -3604.8 | -182.0  | -435.8  |
| c4mpyr-br-p2   | -51.3 | -38.8 | -1257.8 | -4059.6  | -1056.0 | -3604.5 | -178.4  | -427.2  | -1056.1 | -3604.9 | -181.9  | -435.7  |
| c4mpyr-br-p3   | -51.2 | -39.1 | -1257.9 | -4059.4  | -1056.0 | -3604.5 | -178.4  | -427.2  | -1056.1 | -3604.9 | -181.8  | -435.4  |
| c4mpyr-cl-p1   | -44.1 | -34.7 | -1208.0 | -4019.6  | -1056.1 | -3604.4 | -131.4  | -391.6  | -1056.2 | -3604.8 | -133.7  | -398.1  |
| c4mpyr-cl-p2   | -43.3 | -34.1 | -1207.5 | -4019.5  | -1055.9 | -3604.7 | -131.4  | -391.6  | -1056.0 | -3605.1 | -133.7  | -398.1  |
| c4mpyr-cl-p3   | -42.2 | -33.3 | -1207.1 | -4018.7  | -1056.1 | -3604.6 | -131.4  | -391.6  | -1056.2 | -3604.9 | -133.6  | -397.8  |
| c4mpyr-dca-p1  | -44.9 | -38.7 | -1697.2 | -5326.5  | -1055.6 | -3603.5 | -620.9  | -1698.9 | -1055.9 | -3604.5 | -622.0  | -1702.6 |
| c4mpyr-dca-p2  | -46.8 | -40.5 | -1698.8 | -5327.2  | -1055.6 | -3603.8 | -620.9  | -1698.8 | -1055.8 | -3604.7 | -622.2  | -1702.7 |
| c4mpyr-dca-p3  | -45.2 | -39.1 | -1698.2 | -5325.9  | -1055.6 | -3603.7 | -620.9  | -1698.6 | -1055.9 | -3604.6 | -622.1  | -1702.4 |
| c4mpyr-dca-p4  | -46.3 | -39.9 | -1698.1 | -5327.1  | -1055.6 | -3603.7 | -620.9  | -1698.8 | -1055.8 | -3604.7 | -622.1  | -1702.6 |
| c4mpyr-dca-p5  | -47.2 | -41.1 | -1698.7 | -5327.4  | -1055.6 | -3603.7 | -620.9  | -1698.8 | -1055.9 | -3604.7 | -622.0  | -1702.5 |
| c4mpyr-mes-p1  | -42.7 | -33.1 | -1830.3 | -5748.8  | -1055.4 | -3603.6 | -754.1  | -2123.2 | -1055.7 | -3604.8 | -756.3  | -2129.2 |
| c4mpyr-mes-p2  | -39.3 | -30.2 | -1829.3 | -5747.7  | -1056.1 | -3604.2 | -754.2  | -2123.3 | -1056.3 | -3605.2 | -756.3  | -2129.0 |
| c4mpyr-mes-p3  | -38.7 | -29.7 | -1828.7 | -5747.1  | -1055.7 | -3604.1 | -754.1  | -2123.2 | -1055.9 | -3605.1 | -756.2  | -2128.9 |
| c4mpyr-ntf2-p1 | -53.4 | -43.6 | -3475.2 | -10055.5 | -1055.8 | -3603.5 | -2395.4 | -6422.6 | -1056.2 | -3605.1 | -2397.4 | -6428.5 |
| c4mpyr-ntf2-p2 | -45.7 | -36.0 | -3471.8 | -10049.0 | -1055.5 | -3603.2 | -2395.2 | -6421.3 | -1055.9 | -3605.0 | -2397.0 | -6426.9 |
| c4mpyr-ntf2-p3 | -51.6 | -42.1 | -3474.3 | -10054.4 | -1055.5 | -3603.5 | -2395.4 | -6422.7 | -1055.9 | -3605.0 | -2397.4 | -6428.4 |
| c4mpyr-ntf2-p4 | -52.4 | -42.8 | -3474.6 | -10054.8 | -1055.6 | -3603.5 | -2395.4 | -6422.6 | -1055.9 | -3604.9 | -2397.3 | -6428.5 |
| c4mpyr-ntf2-p5 | -42.4 | -33.8 | -3470.2 | -10047.4 | -1055.2 | -3603.2 | -2395.2 | -6421.5 | -1055.6 | -3604.7 | -2396.8 | -6426.5 |
| c4mpyr-ntf2-p6 | -42.5 | -33.9 | -3470.8 | -10047.6 | -1055.6 | -3603.5 | -2395.3 | -6421.5 | -1056.0 | -3604.9 | -2397.0 | -6426.6 |
| c4mpyr-pf6-p1  | -34.7 | -26.3 | -2275.8 | -6900.6  | -1055.4 | -3603.2 | -1204.6 | -3278.5 | -1055.7 | -3604.4 | -1206.6 | -3283.5 |
| c4mpyr-pf6-p2  | -32.1 | -24.3 | -2274.9 | -6899.5  | -1055.7 | -3603.5 | -1204.6 | -3278.6 | -1055.9 | -3604.5 | -1206.5 | -3283.3 |
| c4mpyr-pf6-p3  | -31.8 | -24.1 | -2274.7 | -6899.4  | -1055.5 | -3603.5 | -1204.7 | -3278.6 | -1055.7 | -3604.4 | -1206.5 | -3283.3 |
| c4mpyr-tos-p1  | -41.3 | -31.8 | -2479.2 | -7570.4  | -1055.5 | -3603.7 | -1403.4 | -3945.6 | -1055.8 | -3605.0 | -1405.5 | -3951.5 |
| c4mpyr-tos-p2  | -37.9 | -28.9 | -2478.1 | -7569.2  | -1056.1 | -3604.1 | -1403.5 | -3945.7 | -1056.4 | -3605.4 | -1405.5 | -3951.2 |



## 2.2.10 JCCT basis set

Table S 11: Raw JCCT energies. Superscript \* indicates monomer calculated in the dimer basis set.

| ion pair       | E(int) | E(int) CP | E(dimer) SS | E(dimer) OS | E(A) SS | E(A) OS | E(B) SS | E(B) OS | E(A) SS* | E(A) OS* | E(B) SS* | E(B) OS* |
|----------------|--------|-----------|-------------|-------------|---------|---------|---------|---------|----------|----------|----------|----------|
| c1mim-bf4-p1   | -35.0  | -28.1     | -1597.7     | -4638.9     | -785.5  | -2429.7 | -796.9  | -2189.5 | -786.0   | -2432.1  | -797.6   | -2192.9  |
| c1mim-br-p1    | -51.4  | -39.7     | -993.4      | -2900.7     | -787.5  | -2437.7 | -182.3  | -435.2  | -787.7   | -2438.6  | -185.0   | -443.1   |
| c1mim-br-p2    | -32.5  | -23.6     | -985.4      | -2889.4     | -787.2  | -2437.7 | -182.3  | -435.2  | -787.3   | -2438.2  | -184.4   | -441.4   |
| c1mim-cl-p1    | -38.6  | -31.9     | -939.9      | -2856.6     | -787.3  | -2437.4 | -134.4  | -398.8  | -787.5   | -2438.3  | -135.3   | -403.4   |
| c1mim-cl-p2    | -26.4  | -21.1     | -935.7      | -2849.6     | -787.5  | -2438.3 | -134.4  | -398.8  | -787.6   | -2438.8  | -135.1   | -402.8   |
| c1mim-dca-p1   | -64.8  | -57.1     | -1444.9     | -4189.8     | -786.0  | -2431.0 | -629.5  | -1723.4 | -786.4   | -2433.3  | -630.3   | -1727.5  |
| c1mim-dca-p2   | -46.4  | -40.7     | -1437.1     | -4180.2     | -786.1  | -2432.1 | -629.2  | -1723.4 | -786.3   | -2433.5  | -629.8   | -1726.9  |
| c1mim-mes-p1   | -46.1  | -37.8     | -1567.7     | -4594.6     | -786.0  | -2430.6 | -760.0  | -2139.6 | -786.5   | -2433.0  | -761.0   | -2144.1  |
| c1mim-ntf2-p1  | -77.6  | -64.5     | -3233.8     | -8952.6     | -785.5  | -2429.8 | -2414.4 | -6479.0 | -786.3   | -2433.8  | -2415.8  | -6485.8  |
| c1mim-ntf2-p2  | -41.7  | -33.2     | -3218.9     | -8931.1     | -785.8  | -2431.7 | -2413.6 | -6477.2 | -786.2   | -2433.7  | -2414.7  | -6482.1  |
| c1mim-ntf2-p3  | -46.4  | -36.8     | -3221.5     | -8933.3     | -785.6  | -2430.7 | -2414.3 | -6477.9 | -786.2   | -2433.7  | -2415.3  | -6482.9  |
| c1mim-pf6-p1   | -37.5  | -30.4     | -2017.6     | -5761.6     | -785.5  | -2429.8 | -1215.7 | -3310.7 | -786.0   | -2432.3  | -1216.3  | -3314.2  |
| c1mim-tos-p1   | -45.0  | -36.2     | -2217.9     | -6422.9     | -785.7  | -2430.3 | -1411.2 | -3968.5 | -786.2   | -2433.1  | -1412.2  | -3973.1  |
| c1mpyr-bf4-p1  | -33.3  | -27.5     | -1554.9     | -4747.7     | -743.1  | -2541.8 | -796.5  | -2187.9 | -743.4   | -2543.5  | -797.1   | -2191.0  |
| c1mpyr-bf4-p2  | -30.3  | -25.2     | -1553.7     | -4746.3     | -743.2  | -2542.0 | -796.5  | -2187.9 | -743.5   | -2543.4  | -797.1   | -2190.8  |
| c1mpyr-br-p1   | -50.0  | -40.0     | -949.1      | -3004.9     | -743.7  | -2542.9 | -182.3  | -435.2  | -743.9   | -2543.4  | -184.7   | -442.0   |
| c1mpyr-br-p2   | -47.0  | -37.9     | -947.8      | -3003.5     | -743.7  | -2543.1 | -182.3  | -435.2  | -743.8   | -2543.6  | -184.5   | -441.5   |
| c1mpyr-cl-p1   | -40.0  | -34.5     | -897.2      | -2962.7     | -743.8  | -2542.9 | -134.4  | -398.8  | -743.9   | -2543.5  | -135.2   | -402.8   |
| c1mpyr-cl-p2   | -38.5  | -33.4     | -896.5      | -2962.0     | -743.8  | -2543.2 | -134.4  | -398.8  | -743.9   | -2543.6  | -135.1   | -402.5   |
| c1mpyr-dca-p1  | -43.7  | -38.4     | -1388.0     | -4273.8     | -743.6  | -2542.6 | -623.5  | -1708.4 | -743.9   | -2543.9  | -624.1   | -1711.4  |
| c1mpyr-dca-p2  | -47.6  | -42.1     | -1389.1     | -4276.4     | -743.4  | -2542.3 | -623.4  | -1708.7 | -743.7   | -2543.7  | -624.1   | -1711.9  |
| c1mpyr-dca-p3  | -45.0  | -39.4     | -1386.4     | -4276.5     | -743.1  | -2542.0 | -623.4  | -1709.3 | -743.5   | -2543.6  | -624.0   | -1712.4  |
| c1mpyr-dca-p4  | -46.2  | -40.5     | -1388.1     | -4275.5     | -743.2  | -2542.1 | -623.5  | -1708.8 | -743.5   | -2543.5  | -624.1   | -1712.0  |
| c1mpyr-mes-p1  | -40.5  | -33.5     | -1523.0     | -4703.6     | -743.1  | -2542.1 | -760.1  | -2140.8 | -743.4   | -2543.8  | -760.9   | -2144.9  |
| c1mpyr-mes-p2  | -35.1  | -29.1     | -1520.8     | -4701.0     | -743.3  | -2542.5 | -760.1  | -2140.8 | -743.6   | -2543.9  | -760.8   | -2144.5  |
| c1mpyr-ntf2-p1 | -51.8  | -42.9     | -3179.2     | -9048.9     | -743.4  | -2541.9 | -2412.9 | -6478.1 | -743.9   | -2544.1  | -2414.0  | -6483.2  |
| c1mpyr-ntf2-p2 | -40.1  | -32.4     | -3174.3     | -9040.4     | -743.1  | -2541.6 | -2412.8 | -6477.0 | -743.6   | -2543.8  | -2413.7  | -6481.2  |
| c1mpyr-ntf2-p3 | -49.9  | -41.5     | -3178.4     | -9047.6     | -743.4  | -2542.1 | -2412.8 | -6477.9 | -743.8   | -2544.1  | -2413.9  | -6482.7  |
| c1mpyr-ntf2-p5 | -41.0  | -33.5     | -3175.0     | -9040.7     | -743.3  | -2541.9 | -2412.7 | -6476.7 | -743.8   | -2543.9  | -2413.5  | -6480.9  |
| c1mpyr-pf6-p1  | -33.4  | -27.8     | -1974.1     | -5870.9     | -743.1  | -2541.7 | -1215.8 | -3311.0 | -743.4   | -2543.4  | -1216.3  | -3314.1  |
| c1mpyr-pf6-p2  | -30.4  | -25.6     | -1972.9     | -5869.5     | -743.2  | -2541.9 | -1215.8 | -3311.2 | -743.5   | -2543.3  | -1216.3  | -3313.8  |
| c1mpyr-tos-p1  | -39.0  | -31.6     | -2173.1     | -6531.3     | -743.1  | -2542.1 | -1410.8 | -3969.4 | -743.5   | -2544.1  | -1411.6  | -3973.6  |
| c1mpyr-tos-p2  | -33.7  | -27.2     | -2170.4     | -6528.9     | -743.2  | -2542.3 | -1410.7 | -3969.4 | -743.6   | -2543.9  | -1411.5  | -3973.1  |



|               |       |       |         |         |        |         |         |         |        |         |         |         |
|---------------|-------|-------|---------|---------|--------|---------|---------|---------|--------|---------|---------|---------|
| c2mim-bf4-p1  | -37.0 | -29.7 | -1704.3 | -4996.7 | -891.0 | -2786.6 | -796.9  | -2189.5 | -891.5 | -2789.0 | -797.6  | -2193.2 |
| c2mim-bf4-p2  | -34.6 | -27.6 | -1702.7 | -4995.0 | -890.6 | -2786.0 | -796.9  | -2189.5 | -891.1 | -2788.4 | -797.6  | -2193.0 |
| c2mim-br-p1   | -53.0 | -40.8 | -1099.0 | -3258.0 | -892.5 | -2794.0 | -182.3  | -435.2  | -892.7 | -2794.9 | -185.2  | -443.4  |
| c2mim-br-p2   | -36.4 | -26.8 | -1093.4 | -3249.7 | -893.4 | -2795.9 | -182.3  | -435.2  | -893.5 | -2796.4 | -184.5  | -441.8  |
| c2mim-br-p3   | -37.6 | -27.5 | -1093.1 | -3249.7 | -892.7 | -2795.1 | -182.3  | -435.2  | -892.8 | -2795.6 | -184.7  | -442.1  |
| c2mim-br-p4   | -53.3 | -41.1 | -1099.8 | -3259.2 | -893.1 | -2795.1 | -182.3  | -435.2  | -893.3 | -2796.0 | -185.1  | -443.4  |
| c2mim-cl-p1   | -40.2 | -33.4 | -1045.7 | -3214.0 | -892.4 | -2793.9 | -134.4  | -398.8  | -892.6 | -2794.8 | -135.3  | -403.6  |
| c2mim-cl-p2   | -28.9 | -23.2 | -1043.0 | -3209.1 | -893.7 | -2796.5 | -134.4  | -398.8  | -893.8 | -2797.0 | -135.1  | -402.9  |
| c2mim-cl-p3   | -29.9 | -24.1 | -1042.6 | -3209.0 | -892.9 | -2795.6 | -134.4  | -398.8  | -893.1 | -2796.2 | -135.2  | -403.1  |
| c2mim-cl-p4   | -39.9 | -33.0 | -1045.9 | -3214.6 | -892.9 | -2794.7 | -134.4  | -398.8  | -893.1 | -2795.6 | -135.3  | -403.6  |
| c2mim-dca-p1  | -66.6 | -58.5 | -1550.4 | -4547.4 | -891.0 | -2787.0 | -629.4  | -1723.8 | -891.4 | -2789.4 | -630.2  | -1728.2 |
| c2mim-dca-p2  | -62.5 | -54.8 | -1549.0 | -4544.7 | -891.1 | -2787.0 | -629.4  | -1723.6 | -891.5 | -2789.3 | -630.3  | -1727.8 |
| c2mim-dca-p3  | -66.9 | -58.8 | -1551.5 | -4547.7 | -891.6 | -2787.6 | -629.6  | -1723.5 | -892.1 | -2790.0 | -630.4  | -1727.9 |
| c2mim-dca-p4  | -63.8 | -55.8 | -1549.3 | -4545.6 | -891.0 | -2787.1 | -629.4  | -1723.5 | -891.5 | -2789.5 | -630.3  | -1727.8 |
| c2mim-dca-p5  | -65.4 | -57.2 | -1550.1 | -4546.4 | -891.0 | -2787.2 | -629.5  | -1723.4 | -891.5 | -2789.6 | -630.4  | -1727.8 |
| c2mim-dca-p6  | -65.6 | -57.6 | -1549.8 | -4546.5 | -890.9 | -2786.7 | -629.5  | -1723.5 | -891.3 | -2789.1 | -630.4  | -1727.8 |
| c2mim-mes-p1  | -51.8 | -42.8 | -1676.1 | -4954.7 | -891.7 | -2787.8 | -760.0  | -2139.5 | -892.2 | -2790.2 | -761.1  | -2144.4 |
| c2mim-mes-p2  | -47.1 | -38.3 | -1672.9 | -4951.5 | -891.0 | -2786.7 | -760.0  | -2139.7 | -891.5 | -2789.2 | -761.1  | -2144.4 |
| c2mim-ntf2-p1 | -84.6 | -70.1 | -3342.3 | -9313.3 | -891.1 | -2786.7 | -2414.4 | -6478.9 | -891.9 | -2791.0 | -2416.0 | -6486.6 |
| c2mim-ntf2-p2 | -53.0 | -42.7 | -3329.5 | -9295.3 | -891.3 | -2788.4 | -2413.9 | -6478.1 | -891.9 | -2791.0 | -2415.2 | -6484.0 |
| c2mim-ntf2-p3 | -49.8 | -39.5 | -3328.5 | -9291.6 | -890.8 | -2787.2 | -2414.3 | -6477.9 | -891.5 | -2790.4 | -2415.4 | -6483.3 |
| c2mim-ntf2-p4 | -74.4 | -61.2 | -3338.3 | -9307.8 | -891.0 | -2786.8 | -2414.7 | -6479.2 | -891.8 | -2790.8 | -2416.1 | -6486.2 |
| c2mim-pf6-p1  | -41.5 | -33.6 | -2124.8 | -6120.4 | -890.9 | -2786.6 | -1215.7 | -3310.6 | -891.4 | -2789.1 | -1216.4 | -3314.7 |
| c2mim-pf6-p2  | -38.1 | -30.6 | -2122.7 | -6118.2 | -890.5 | -2785.9 | -1215.7 | -3310.7 | -891.0 | -2788.5 | -1216.4 | -3314.4 |
| c2mim-tos-p1  | -52.4 | -42.7 | -2327.2 | -6783.8 | -891.6 | -2787.6 | -1411.1 | -3968.4 | -892.2 | -2790.4 | -1412.3 | -3973.5 |
| c2mim-tos-p2  | -46.5 | -37.1 | -2323.8 | -6780.1 | -890.9 | -2786.7 | -1411.2 | -3968.5 | -891.5 | -2789.6 | -1412.2 | -3973.4 |
| c2mpyr-bf4-p1 | -34.2 | -28.0 | -1662.4 | -5107.9 | -850.3 | -2901.4 | -796.5  | -2187.9 | -850.7 | -2903.3 | -797.1  | -2191.2 |
| c2mpyr-bf4-p2 | -31.7 | -26.2 | -1661.9 | -5107.0 | -850.8 | -2901.9 | -796.5  | -2188.0 | -851.1 | -2903.4 | -797.1  | -2191.0 |
| c2mpyr-bf4-p3 | -31.3 | -25.8 | -1661.3 | -5106.6 | -850.4 | -2901.7 | -796.5  | -2187.9 | -850.7 | -2903.2 | -797.1  | -2191.0 |
| c2mpyr-br-p1  | -51.7 | -41.0 | -1056.9 | -3365.5 | -850.9 | -2902.4 | -182.3  | -435.2  | -851.1 | -2903.0 | -184.8  | -442.5  |
| c2mpyr-br-p2  | -49.0 | -39.2 | -1055.9 | -3364.4 | -850.9 | -2903.0 | -182.3  | -435.2  | -851.0 | -2903.4 | -184.6  | -442.0  |
| c2mpyr-br-p3  | -48.6 | -38.8 | -1055.5 | -3363.9 | -850.8 | -2902.6 | -182.3  | -435.2  | -851.0 | -2903.1 | -184.6  | -442.0  |
| c2mpyr-cl-p1  | -41.0 | -35.1 | -1004.7 | -3322.9 | -851.0 | -2902.5 | -134.4  | -398.8  | -851.1 | -2903.1 | -135.2  | -403.0  |
| c2mpyr-cl-p2  | -39.3 | -34.0 | -1003.8 | -3322.1 | -850.7 | -2902.7 | -134.4  | -398.8  | -850.8 | -2903.2 | -135.2  | -402.7  |
| c2mpyr-cl-p3  | -39.1 | -33.7 | -1003.9 | -3322.0 | -851.0 | -2902.7 | -134.4  | -398.8  | -851.1 | -2903.2 | -135.2  | -402.7  |
| c2mpyr-dca-p1 | -44.2 | -38.6 | -1495.3 | -4633.7 | -850.8 | -2902.1 | -623.5  | -1708.4 | -851.1 | -2903.6 | -624.1  | -1711.5 |
| c2mpyr-dca-p2 | -47.5 | -41.8 | -1496.3 | -4635.8 | -850.4 | -2901.8 | -623.5  | -1708.8 | -850.7 | -2903.2 | -624.2  | -1712.1 |
| c2mpyr-dca-p3 | -48.2 | -42.5 | -1496.4 | -4636.3 | -850.5 | -2901.8 | -623.4  | -1708.7 | -850.8 | -2903.3 | -624.1  | -1712.0 |
| c2mpyr-mes-p1 | -42.2 | -34.6 | -1630.8 | -5064.3 | -850.3 | -2901.7 | -760.1  | -2140.8 | -850.7 | -2903.6 | -761.0  | -2145.2 |



|                |       |       |         |         |        |         |         |         |        |         |         |         |
|----------------|-------|-------|---------|---------|--------|---------|---------|---------|--------|---------|---------|---------|
| c2mpyr-mes-p2  | -38.3 | -31.7 | -1629.7 | -5062.9 | -851.0 | -2902.3 | -760.1  | -2140.9 | -851.3 | -2903.8 | -760.9  | -2144.8 |
| c2mpyr-mes-p3  | -37.0 | -30.4 | -1628.6 | -5061.9 | -850.5 | -2902.2 | -760.1  | -2140.8 | -850.8 | -2903.7 | -760.9  | -2144.7 |
| c2mpyr-ntf2-p1 | -53.6 | -44.0 | -3287.3 | -9409.6 | -850.6 | -2901.4 | -2413.1 | -6478.3 | -851.2 | -2903.9 | -2414.2 | -6483.6 |
| c2mpyr-ntf2-p2 | -42.9 | -34.4 | -3282.7 | -9401.8 | -850.3 | -2901.2 | -2412.8 | -6477.2 | -850.8 | -2903.7 | -2413.8 | -6481.8 |
| c2mpyr-ntf2-p3 | -52.0 | -42.9 | -3286.5 | -9408.5 | -850.4 | -2901.5 | -2413.0 | -6478.1 | -850.9 | -2903.7 | -2414.1 | -6483.3 |
| c2mpyr-ntf2-p4 | -51.0 | -42.0 | -3285.9 | -9408.1 | -850.4 | -2901.5 | -2413.0 | -6478.2 | -850.9 | -2903.7 | -2414.1 | -6483.3 |
| c2mpyr-ntf2-p5 | -44.0 | -35.9 | -3283.0 | -9402.0 | -850.1 | -2901.2 | -2412.7 | -6477.0 | -850.6 | -2903.4 | -2413.7 | -6481.5 |
| c2mpyr-ntf2-p6 | -41.6 | -33.7 | -3282.4 | -9401.1 | -850.5 | -2901.5 | -2412.9 | -6477.1 | -851.0 | -2903.6 | -2413.8 | -6481.5 |
| c2mpyr-pf6-p1  | -34.2 | -28.1 | -2081.8 | -6231.2 | -850.5 | -2901.6 | -1215.8 | -3311.0 | -850.9 | -2903.4 | -1216.4 | -3314.3 |
| c2mpyr-pf6-p2  | -31.8 | -26.5 | -2080.9 | -6230.0 | -850.5 | -2901.6 | -1215.8 | -3311.1 | -850.9 | -2903.1 | -1216.3 | -3314.1 |
| c2mpyr-pf6-p3  | -31.3 | -26.1 | -2080.4 | -6229.7 | -850.4 | -2901.5 | -1215.8 | -3311.1 | -850.7 | -2903.0 | -1216.3 | -3314.0 |
| c2mpyr-tos-p1  | -41.0 | -32.9 | -2281.0 | -6892.2 | -850.3 | -2901.7 | -1410.8 | -3969.4 | -850.8 | -2903.9 | -1411.7 | -3973.9 |
| c2mpyr-tos-p2  | -37.2 | -30.2 | -2279.8 | -6890.8 | -850.9 | -2902.2 | -1410.8 | -3969.5 | -851.3 | -2904.0 | -1411.6 | -3973.5 |
| c3mim-bf4-p1   | -38.0 | -30.3 | -1808.8 | -5353.0 | -995.1 | -3142.3 | -796.9  | -2189.5 | -995.6 | -3144.8 | -797.7  | -2193.4 |
| c3mim-bf4-p2   | -37.3 | -29.6 | -1808.4 | -5352.7 | -995.1 | -3142.2 | -796.9  | -2189.5 | -995.6 | -3144.9 | -797.6  | -2193.3 |
| c3mim-br-p1    | -54.2 | -41.5 | -1203.5 | -3614.9 | -996.6 | -3150.2 | -182.3  | -435.2  | -996.8 | -3151.1 | -185.3  | -443.8  |
| c3mim-br-p2    | -37.2 | -27.2 | -1197.6 | -3606.2 | -997.3 | -3151.9 | -182.3  | -435.2  | -997.4 | -3152.5 | -184.6  | -442.1  |
| c3mim-br-p3    | -42.5 | -31.4 | -1199.5 | -3608.6 | -996.9 | -3151.3 | -182.3  | -435.2  | -997.1 | -3152.0 | -184.9  | -442.8  |
| c3mim-br-p4    | -56.0 | -42.4 | -1204.5 | -3616.6 | -996.8 | -3150.9 | -182.3  | -435.2  | -997.1 | -3151.9 | -185.5  | -444.3  |
| c3mim-cl-p1    | -40.9 | -33.9 | -1150.0 | -3570.5 | -996.5 | -3150.0 | -134.4  | -398.8  | -996.7 | -3150.9 | -135.4  | -403.7  |
| c3mim-cl-p2    | -29.2 | -23.4 | -1147.0 | -3565.3 | -997.5 | -3152.4 | -134.4  | -398.8  | -997.6 | -3153.0 | -135.1  | -403.1  |
| c3mim-cl-p3    | -33.3 | -26.9 | -1148.3 | -3567.0 | -997.1 | -3151.8 | -134.4  | -398.8  | -997.3 | -3152.4 | -135.2  | -403.4  |
| c3mim-cl-p4    | -41.4 | -33.9 | -1150.2 | -3571.4 | -996.6 | -3150.5 | -134.4  | -398.8  | -996.9 | -3151.5 | -135.4  | -404.0  |
| c3mim-dca-p1   | -67.9 | -59.4 | -1654.9 | -4903.8 | -995.0 | -3142.5 | -629.4  | -1723.8 | -995.5 | -3145.1 | -630.3  | -1728.4 |
| c3mim-dca-p2   | -69.3 | -60.7 | -1655.8 | -4905.0 | -995.4 | -3143.1 | -629.4  | -1723.6 | -995.9 | -3145.7 | -630.3  | -1728.2 |
| c3mim-dca-p3   | -57.9 | -50.6 | -1651.3 | -4898.9 | -995.4 | -3143.9 | -629.2  | -1723.7 | -995.8 | -3145.8 | -630.0  | -1727.9 |
| c3mim-dca-p4   | -70.5 | -61.8 | -1656.6 | -4904.7 | -995.1 | -3142.7 | -629.5  | -1723.5 | -995.6 | -3145.3 | -630.4  | -1728.2 |
| c3mim-dca-p5   | -67.5 | -58.8 | -1653.9 | -4902.9 | -994.5 | -3141.9 | -629.3  | -1723.5 | -995.1 | -3144.6 | -630.2  | -1728.2 |
| c3mim-dca-p6   | -66.0 | -57.8 | -1653.6 | -4902.1 | -994.6 | -3142.0 | -629.5  | -1723.6 | -995.1 | -3144.3 | -630.4  | -1728.0 |
| c3mim-mes-p1   | -54.6 | -44.9 | -1781.6 | -5312.0 | -995.9 | -3143.7 | -760.0  | -2139.6 | -996.4 | -3146.3 | -761.2  | -2144.8 |
| c3mim-mes-p2   | -47.9 | -38.7 | -1777.0 | -5307.4 | -994.8 | -3142.0 | -760.0  | -2139.7 | -995.3 | -3144.7 | -761.1  | -2144.6 |
| c3mim-ntf2-p1  | -88.6 | -73.2 | -3448.2 | -9671.3 | -995.1 | -3142.4 | -2414.4 | -6479.0 | -996.0 | -3146.9 | -2416.1 | -6487.2 |
| c3mim-ntf2-p2  | -57.7 | -46.6 | -3435.6 | -9653.4 | -995.3 | -3143.9 | -2414.0 | -6478.1 | -995.9 | -3146.7 | -2415.3 | -6484.5 |
| c3mim-ntf2-p3  | -52.0 | -41.0 | -3433.5 | -9648.3 | -994.9 | -3142.8 | -2414.3 | -6477.9 | -995.5 | -3146.1 | -2415.5 | -6483.6 |
| c3mim-ntf2-p4  | -76.3 | -62.7 | -3442.5 | -9664.1 | -994.7 | -3141.7 | -2414.6 | -6479.3 | -995.5 | -3145.8 | -2416.1 | -6486.4 |
| c3mim-pf6-p1   | -42.6 | -34.8 | -2229.0 | -6476.6 | -994.8 | -3142.0 | -1215.6 | -3310.4 | -995.4 | -3144.6 | -1216.3 | -3314.4 |
| c3mim-pf6-p2   | -38.4 | -30.7 | -2226.6 | -6473.8 | -994.4 | -3141.3 | -1215.7 | -3310.7 | -994.9 | -3143.9 | -1216.4 | -3314.5 |
| c3mim-tos-p1   | -55.9 | -45.4 | -2432.9 | -7141.6 | -995.7 | -3143.4 | -1411.2 | -3968.4 | -996.3 | -3146.5 | -1412.4 | -3974.0 |
| c3mim-tos-p2   | -53.2 | -42.9 | -2431.2 | -7139.9 | -995.4 | -3142.8 | -1411.2 | -3968.5 | -996.0 | -3146.0 | -1412.3 | -3973.8 |



|                |       |       |         |         |         |         |         |         |         |         |         |         |
|----------------|-------|-------|---------|---------|---------|---------|---------|---------|---------|---------|---------|---------|
| c3mpyr-bf4-p1  | -34.7 | -28.4 | -1766.6 | -5464.6 | -954.3  | -3257.8 | -796.5  | -2187.9 | -954.7  | -3259.7 | -797.1  | -2191.3 |
| c3mpyr-bf4-p2  | -32.1 | -26.3 | -1765.9 | -5463.4 | -954.6  | -3258.1 | -796.5  | -2188.0 | -955.0  | -3259.7 | -797.1  | -2191.1 |
| c3mpyr-bf4-p3  | -31.9 | -26.2 | -1765.4 | -5463.2 | -954.4  | -3258.0 | -796.5  | -2187.9 | -954.7  | -3259.6 | -797.1  | -2191.1 |
| c3mpyr-br-p1   | -52.9 | -41.8 | -1161.5 | -3722.5 | -955.0  | -3258.7 | -182.3  | -435.2  | -955.1  | -3259.4 | -184.9  | -442.7  |
| c3mpyr-br-p2   | -49.8 | -39.2 | -1159.9 | -3720.9 | -954.8  | -3258.8 | -182.3  | -435.2  | -954.9  | -3259.4 | -184.8  | -442.4  |
| c3mpyr-br-p3   | -49.8 | -39.6 | -1160.0 | -3721.0 | -954.9  | -3258.9 | -182.3  | -435.2  | -955.0  | -3259.5 | -184.7  | -442.2  |
| c3mpyr-cl-p1   | -41.6 | -35.6 | -1108.9 | -3679.6 | -955.0  | -3258.8 | -134.4  | -398.8  | -955.1  | -3259.5 | -135.2  | -403.1  |
| c3mpyr-cl-p2   | -40.0 | -34.3 | -1108.0 | -3678.8 | -954.7  | -3258.9 | -134.4  | -398.8  | -954.9  | -3259.5 | -135.2  | -402.9  |
| c3mpyr-cl-p3   | -39.7 | -34.1 | -1108.0 | -3678.7 | -954.9  | -3259.0 | -134.4  | -398.8  | -955.1  | -3259.5 | -135.2  | -402.8  |
| c3mpyr-dca-p1  | -45.7 | -39.8 | -1599.7 | -4990.8 | -954.5  | -3258.1 | -623.5  | -1708.6 | -954.9  | -3259.7 | -624.2  | -1711.9 |
| c3mpyr-dca-p2  | -47.8 | -41.8 | -1600.4 | -4992.2 | -954.4  | -3258.1 | -623.5  | -1708.8 | -954.8  | -3259.6 | -624.2  | -1712.2 |
| c3mpyr-dca-p3  | -44.0 | -38.4 | -1597.3 | -4992.4 | -954.5  | -3258.1 | -623.5  | -1709.6 | -954.9  | -3259.6 | -624.1  | -1712.7 |
| c3mpyr-dca-p4  | -46.5 | -40.7 | -1599.7 | -4991.9 | -954.7  | -3258.3 | -623.4  | -1708.7 | -955.0  | -3259.8 | -624.1  | -1711.9 |
| c3mpyr-dca-p5  | -48.4 | -42.5 | -1600.4 | -4992.7 | -954.5  | -3258.1 | -623.4  | -1708.7 | -954.8  | -3259.7 | -624.1  | -1712.1 |
| c3mpyr-mes-p1  | -43.2 | -35.4 | -1735.1 | -5421.3 | -954.3  | -3258.0 | -760.1  | -2140.8 | -954.8  | -3260.0 | -761.0  | -2145.3 |
| c3mpyr-mes-p2  | -38.9 | -31.9 | -1733.8 | -5419.6 | -954.9  | -3258.5 | -760.1  | -2140.9 | -955.3  | -3260.2 | -760.9  | -2145.0 |
| c3mpyr-mes-p3  | -38.1 | -31.2 | -1733.1 | -5418.9 | -954.5  | -3258.5 | -760.1  | -2140.8 | -954.8  | -3260.1 | -760.9  | -2144.9 |
| c3mpyr-ntf2-p1 | -56.0 | -45.9 | -3392.4 | -9767.5 | -954.7  | -3258.0 | -2413.0 | -6478.3 | -955.3  | -3260.6 | -2414.2 | -6483.8 |
| c3mpyr-ntf2-p2 | -42.8 | -34.3 | -3386.9 | -9757.9 | -954.3  | -3257.7 | -2412.8 | -6477.1 | -954.9  | -3260.1 | -2413.8 | -6481.6 |
| c3mpyr-ntf2-p3 | -52.6 | -43.2 | -3390.7 | -9765.2 | -954.3  | -3257.7 | -2413.0 | -6478.2 | -954.9  | -3260.1 | -2414.2 | -6483.6 |
| c3mpyr-ntf2-p4 | -53.5 | -44.0 | -3391.0 | -9765.8 | -954.4  | -3257.9 | -2413.0 | -6478.1 | -955.0  | -3260.3 | -2414.1 | -6483.4 |
| c3mpyr-ntf2-p5 | -44.3 | -35.9 | -3387.0 | -9758.6 | -954.1  | -3257.5 | -2412.7 | -6476.9 | -954.6  | -3259.8 | -2413.7 | -6481.6 |
| c3mpyr-ntf2-p6 | -43.6 | -35.2 | -3387.2 | -9758.5 | -954.5  | -3257.9 | -2412.8 | -6477.0 | -955.0  | -3260.2 | -2413.8 | -6481.6 |
| c3mpyr-pf6-p1  | -35.4 | -29.1 | -2186.0 | -6588.1 | -954.2  | -3257.6 | -1215.8 | -3311.1 | -954.7  | -3259.6 | -1216.4 | -3314.4 |
| c3mpyr-pf6-p2  | -32.1 | -26.5 | -2184.9 | -6586.4 | -954.5  | -3257.8 | -1215.8 | -3311.1 | -954.8  | -3259.4 | -1216.3 | -3314.2 |
| c3mpyr-pf6-p3  | -32.1 | -26.5 | -2184.6 | -6586.5 | -954.3  | -3257.8 | -1215.8 | -3311.1 | -954.7  | -3259.4 | -1216.3 | -3314.1 |
| c3mpyr-tos-p1  | -42.3 | -33.9 | -2385.4 | -7249.3 | -954.3  | -3258.0 | -1410.7 | -3969.4 | -954.8  | -3260.3 | -1411.7 | -3974.0 |
| c3mpyr-tos-p2  | -38.0 | -30.4 | -2384.0 | -7247.5 | -954.9  | -3258.5 | -1410.7 | -3969.4 | -955.3  | -3260.4 | -1411.6 | -3973.7 |
| c4mim-bf4-p1   | -38.6 | -30.8 | -1913.0 | -5708.9 | -1099.0 | -3497.8 | -796.9  | -2189.5 | -1099.5 | -3500.4 | -797.7  | -2193.5 |
| c4mim-bf4-p2   | -37.6 | -29.8 | -1912.3 | -5708.3 | -1098.9 | -3497.6 | -796.9  | -2189.5 | -1099.5 | -3500.3 | -797.7  | -2193.4 |
| c4mim-br-p1    | -55.4 | -42.4 | -1307.9 | -3971.7 | -1100.5 | -3506.4 | -182.3  | -435.2  | -1100.7 | -3507.3 | -185.4  | -444.0  |
| c4mim-br-p2    | -38.4 | -28.1 | -1302.0 | -3963.0 | -1101.2 | -3508.0 | -182.3  | -435.2  | -1101.3 | -3508.6 | -184.7  | -442.2  |
| c4mim-br-p3    | -44.9 | -33.1 | -1304.5 | -3966.1 | -1100.8 | -3507.4 | -182.3  | -435.2  | -1101.0 | -3508.1 | -185.1  | -443.2  |
| c4mim-br-p4    | -56.7 | -42.9 | -1308.6 | -3973.0 | -1100.7 | -3506.8 | -182.3  | -435.2  | -1100.9 | -3507.8 | -185.5  | -444.5  |
| c4mim-cl-p1    | -41.6 | -34.4 | -1254.2 | -3927.0 | -1100.3 | -3506.1 | -134.4  | -398.8  | -1100.5 | -3507.0 | -135.4  | -403.8  |
| c4mim-cl-p2    | -29.9 | -24.0 | -1251.1 | -3921.8 | -1101.4 | -3508.5 | -134.4  | -398.8  | -1101.5 | -3509.2 | -135.2  | -403.1  |
| c4mim-cl-p3    | -34.8 | -28.2 | -1252.8 | -3923.9 | -1101.0 | -3507.8 | -134.4  | -398.8  | -1101.2 | -3508.5 | -135.3  | -403.6  |
| c4mim-cl-p4    | -41.9 | -34.3 | -1254.3 | -3927.7 | -1100.5 | -3506.4 | -134.4  | -398.8  | -1100.7 | -3507.4 | -135.4  | -404.1  |
| c4mim-dca-p1   | -68.8 | -60.1 | -1759.2 | -5259.8 | -1098.9 | -3498.1 | -629.4  | -1723.8 | -1099.4 | -3500.7 | -630.3  | -1728.5 |



|                |       |       |         |          |         |         |         |         |         |         |         |         |
|----------------|-------|-------|---------|----------|---------|---------|---------|---------|---------|---------|---------|---------|
| c4mim-dca-p2   | -72.3 | -63.2 | -1761.3 | -5261.3  | -1099.1 | -3498.3 | -629.5  | -1723.5 | -1099.6 | -3501.0 | -630.4  | -1728.4 |
| c4mim-dca-p3   | -68.0 | -59.1 | -1757.9 | -5258.7  | -1098.4 | -3497.4 | -629.3  | -1723.5 | -1098.9 | -3500.0 | -630.3  | -1728.3 |
| c4mim-mes-p1   | -56.0 | -46.0 | -1886.1 | -5668.4  | -1099.8 | -3499.2 | -760.0  | -2139.6 | -1100.4 | -3501.9 | -761.2  | -2145.0 |
| c4mim-mes-p2   | -48.1 | -38.8 | -1880.9 | -5662.9  | -1098.6 | -3497.3 | -760.1  | -2139.7 | -1099.1 | -3500.0 | -761.1  | -2144.7 |
| c4mim-pf6-p1   | -44.7 | -36.0 | -2334.2 | -6833.5  | -1098.9 | -3497.9 | -1215.7 | -3310.6 | -1099.5 | -3500.7 | -1216.5 | -3315.1 |
| c4mim-pf6-p2   | -38.5 | -30.7 | -2330.4 | -6829.3  | -1098.2 | -3496.6 | -1215.7 | -3310.7 | -1098.7 | -3499.3 | -1216.4 | -3314.6 |
| c4mim-tos-p1   | -58.4 | -47.4 | -2538.0 | -7498.6  | -1099.7 | -3499.0 | -1411.2 | -3968.4 | -1100.3 | -3502.3 | -1412.4 | -3974.2 |
| c4mim-tos-p2   | -54.2 | -43.8 | -2536.1 | -7496.3  | -1099.6 | -3498.8 | -1411.2 | -3968.5 | -1100.3 | -3502.0 | -1412.4 | -3973.9 |
| c4mpyr-bf4-p1  | -34.9 | -28.4 | -1870.5 | -5820.6  | -1058.1 | -3613.6 | -796.5  | -2187.9 | -1058.6 | -3615.6 | -797.1  | -2191.4 |
| c4mpyr-bf4-p2  | -32.4 | -26.5 | -1869.7 | -5819.5  | -1058.4 | -3613.9 | -796.5  | -2188.0 | -1058.8 | -3615.6 | -797.1  | -2191.2 |
| c4mpyr-bf4-p3  | -32.2 | -26.3 | -1869.4 | -5819.4  | -1058.2 | -3613.9 | -796.5  | -2187.9 | -1058.6 | -3615.5 | -797.1  | -2191.2 |
| c4mpyr-br-p1   | -53.4 | -42.1 | -1265.5 | -4078.7  | -1058.8 | -3614.6 | -182.3  | -435.2  | -1058.9 | -3615.3 | -185.0  | -442.9  |
| c4mpyr-br-p2   | -50.4 | -39.5 | -1263.8 | -4077.3  | -1058.6 | -3614.7 | -182.3  | -435.2  | -1058.7 | -3615.3 | -184.9  | -442.6  |
| c4mpyr-br-p3   | -50.3 | -39.8 | -1264.0 | -4077.2  | -1058.7 | -3614.7 | -182.3  | -435.2  | -1058.8 | -3615.3 | -184.8  | -442.4  |
| c4mpyr-cl-p1   | -41.7 | -35.6 | -1212.7 | -4035.5  | -1058.8 | -3614.6 | -134.4  | -398.8  | -1058.9 | -3615.3 | -135.3  | -403.1  |
| c4mpyr-cl-p2   | -40.6 | -34.8 | -1212.1 | -4035.1  | -1058.6 | -3614.9 | -134.4  | -398.8  | -1058.7 | -3615.5 | -135.2  | -403.0  |
| c4mpyr-cl-p3   | -39.8 | -34.1 | -1211.8 | -4034.6  | -1058.7 | -3614.8 | -134.4  | -398.8  | -1058.9 | -3615.4 | -135.2  | -402.9  |
| c4mpyr-dca-p1  | -46.6 | -40.0 | -1702.8 | -5348.1  | -1058.3 | -3613.7 | -623.5  | -1708.9 | -1058.7 | -3615.5 | -624.2  | -1712.4 |
| c4mpyr-dca-p2  | -47.9 | -41.8 | -1704.2 | -5348.3  | -1058.3 | -3614.0 | -623.5  | -1708.8 | -1058.6 | -3615.6 | -624.2  | -1712.3 |
| c4mpyr-dca-p3  | -46.7 | -40.5 | -1703.8 | -5347.3  | -1058.3 | -3613.9 | -623.5  | -1708.6 | -1058.7 | -3615.6 | -624.2  | -1712.0 |
| c4mpyr-dca-p4  | -47.9 | -41.2 | -1703.7 | -5348.7  | -1058.2 | -3614.0 | -623.5  | -1708.8 | -1058.7 | -3615.8 | -624.2  | -1712.4 |
| c4mpyr-dca-p5  | -48.6 | -42.6 | -1704.3 | -5348.8  | -1058.3 | -3614.0 | -623.5  | -1708.8 | -1058.6 | -3615.5 | -624.1  | -1712.2 |
| c4mpyr-mes-p1  | -43.3 | -35.4 | -1838.9 | -5777.3  | -1058.1 | -3613.9 | -760.1  | -2140.8 | -1058.6 | -3615.9 | -761.0  | -2145.4 |
| c4mpyr-mes-p2  | -39.6 | -32.4 | -1837.8 | -5775.9  | -1058.8 | -3614.4 | -760.1  | -2140.9 | -1059.1 | -3616.2 | -761.0  | -2145.1 |
| c4mpyr-mes-p3  | -38.5 | -31.5 | -1837.1 | -5775.0  | -1058.3 | -3614.3 | -760.1  | -2140.8 | -1058.7 | -3616.1 | -760.9  | -2145.0 |
| c4mpyr-ntf2-p1 | -56.3 | -46.0 | -3496.2 | -10123.5 | -1058.4 | -3613.8 | -2413.0 | -6478.2 | -1059.1 | -3616.5 | -2414.2 | -6483.9 |
| c4mpyr-ntf2-p2 | -48.6 | -38.7 | -3492.7 | -10116.7 | -1058.1 | -3613.4 | -2412.7 | -6476.7 | -1058.8 | -3616.3 | -2413.8 | -6481.9 |
| c4mpyr-ntf2-p3 | -54.1 | -44.3 | -3495.1 | -10122.0 | -1058.1 | -3613.7 | -2413.0 | -6478.2 | -1058.7 | -3616.1 | -2414.2 | -6483.7 |
| c4mpyr-ntf2-p4 | -55.0 | -44.9 | -3495.4 | -10122.6 | -1058.2 | -3613.7 | -2413.0 | -6478.1 | -1058.8 | -3616.3 | -2414.2 | -6483.8 |
| c4mpyr-ntf2-p5 | -45.2 | -36.5 | -3491.1 | -10115.0 | -1057.9 | -3613.4 | -2412.7 | -6476.9 | -1058.4 | -3615.8 | -2413.7 | -6481.7 |
| c4mpyr-ntf2-p6 | -45.5 | -36.6 | -3491.8 | -10115.4 | -1058.3 | -3613.7 | -2412.8 | -6476.9 | -1058.9 | -3616.2 | -2413.8 | -6481.7 |
| c4mpyr-pf6-p1  | -35.7 | -29.2 | -2289.9 | -6944.2  | -1058.0 | -3613.5 | -1215.8 | -3311.1 | -1058.5 | -3615.5 | -1216.4 | -3314.5 |
| c4mpyr-pf6-p2  | -32.7 | -26.9 | -2288.9 | -6942.8  | -1058.3 | -3613.8 | -1215.8 | -3311.1 | -1058.7 | -3615.5 | -1216.4 | -3314.3 |
| c4mpyr-pf6-p3  | -32.4 | -26.7 | -2288.6 | -6942.6  | -1058.1 | -3613.7 | -1215.8 | -3311.1 | -1058.5 | -3615.4 | -1216.4 | -3314.2 |
| c4mpyr-tos-p1  | -42.7 | -34.1 | -2489.4 | -7605.5  | -1058.1 | -3613.9 | -1410.7 | -3969.4 | -1058.7 | -3616.3 | -1411.7 | -3974.1 |
| c4mpyr-tos-p2  | -38.8 | -31.0 | -2488.1 | -7604.0  | -1058.7 | -3614.4 | -1410.8 | -3969.4 | -1059.2 | -3616.5 | -1411.7 | -3973.8 |



### 2.2.11 ACCT basis set

Table S 12: Raw ACCT energies. Superscript \* indicates monomer calculated in the dimer basis set.

| ion pair       | E(int) | E(int) CP | E(dimer) SS | E(dimer) OS | E(A) SS | E(A) OS | E(B) SS | E(B) OS | E(A) SS* | E(A) OS* | E(B) SS* | E(B) OS* |
|----------------|--------|-----------|-------------|-------------|---------|---------|---------|---------|----------|----------|----------|----------|
| c1mim-bf4-p1   | -37.1  | -30.1     | -1610.5     | -4707.0     | -790.9  | -2459.3 | -803.8  | -2226.4 | -791.3   | -2461.5  | -804.3   | -2230.5  |
| c1mim-br-p1    | -58.4  | -42.6     | -1004.9     | -2947.0     | -793.0  | -2467.5 | -186.0  | -447.0  | -793.1   | -2468.4  | -189.9   | -457.9   |
| c1mim-br-p2    | -41.2  | -25.7     | -997.1      | -2937.6     | -792.8  | -2467.7 | -186.0  | -447.0  | -792.9   | -2468.3  | -189.7   | -458.1   |
| c1mim-cl-p1    | -41.1  | -34.8     | -947.9      | -2897.3     | -792.8  | -2467.2 | -136.2  | -408.0  | -793.0   | -2468.1  | -136.7   | -412.7   |
| c1mim-cl-p2    | -29.7  | -23.0     | -943.6      | -2891.6     | -793.0  | -2468.3 | -136.2  | -408.0  | -793.1   | -2468.9  | -136.7   | -413.4   |
| c1mim-dca-p1   | -67.0  | -59.8     | -1454.9     | -4243.8     | -791.4  | -2460.7 | -633.3  | -1746.2 | -791.8   | -2463.0  | -633.8   | -1750.2  |
| c1mim-dca-p2   | -49.7  | -43.0     | -1447.1     | -4235.3     | -791.5  | -2461.9 | -633.0  | -1746.3 | -791.8   | -2463.6  | -633.5   | -1750.5  |
| c1mim-mes-p1   | -49.1  | -40.5     | -1581.5     | -4661.7     | -791.4  | -2460.3 | -767.7  | -2174.7 | -791.8   | -2462.6  | -768.3   | -2179.9  |
| c1mim-ntf2-p1  | -80.9  | -67.0     | -3262.2     | -9088.5     | -791.0  | -2459.5 | -2436.8 | -6582.5 | -791.5   | -2463.2  | -2438.0  | -6591.0  |
| c1mim-ntf2-p2  | -45.6  | -34.4     | -3247.1     | -9067.7     | -791.3  | -2461.4 | -2436.0 | -6580.6 | -791.6   | -2463.8  | -2437.0  | -6587.9  |
| c1mim-ntf2-p3  | -50.1  | -38.8     | -3250.0     | -9069.7     | -791.0  | -2460.4 | -2436.7 | -6581.5 | -791.4   | -2463.2  | -2437.7  | -6588.5  |
| c1mim-pf6-p1   | -40.5  | -32.5     | -2036.5     | -5853.0     | -790.9  | -2459.5 | -1228.5 | -3370.2 | -791.3   | -2461.6  | -1229.1  | -3375.2  |
| c1mim-tos-p1   | -47.9  | -38.7     | -2235.7     | -6512.1     | -791.1  | -2459.9 | -1423.0 | -4026.0 | -791.5   | -2462.6  | -1423.7  | -4031.4  |
| c1mpyr-bf4-p1  | -36.9  | -29.4     | -1569.1     | -4821.6     | -749.8  | -2575.9 | -803.3  | -2224.7 | -750.0   | -2577.5  | -804.0   | -2229.9  |
| c1mpyr-bf4-p2  | -33.9  | -26.9     | -1567.8     | -4820.1     | -749.9  | -2576.1 | -803.3  | -2224.7 | -750.1   | -2577.4  | -803.9   | -2229.6  |
| c1mpyr-br-p1   | -61.0  | -42.8     | -962.7      | -3058.8     | -750.5  | -2577.0 | -186.0  | -447.0  | -750.6   | -2577.6  | -190.5   | -460.1   |
| c1mpyr-br-p2   | -57.9  | -40.6     | -961.3      | -3057.3     | -750.5  | -2577.2 | -186.0  | -447.0  | -750.6   | -2577.7  | -190.3   | -459.5   |
| c1mpyr-cl-p1   | -44.0  | -37.1     | -906.5      | -3009.3     | -750.6  | -2577.1 | -136.2  | -408.0  | -750.6   | -2577.7  | -136.7   | -413.6   |
| c1mpyr-cl-p2   | -42.6  | -36.0     | -905.8      | -3008.7     | -750.5  | -2577.3 | -136.2  | -408.0  | -750.6   | -2577.8  | -136.7   | -413.5   |
| c1mpyr-dca-p1  | -46.6  | -40.6     | -1399.2     | -4333.0     | -750.4  | -2576.7 | -627.3  | -1731.2 | -750.6   | -2578.2  | -627.7   | -1735.1  |
| c1mpyr-dca-p2  | -50.7  | -44.5     | -1400.4     | -4335.7     | -750.2  | -2576.4 | -627.2  | -1731.6 | -750.4   | -2577.9  | -627.7   | -1735.6  |
| c1mpyr-dca-p3  | -47.8  | -41.0     | -1397.4     | -4335.8     | -749.9  | -2576.1 | -627.2  | -1732.2 | -750.1   | -2577.6  | -627.8   | -1736.7  |
| c1mpyr-dca-p4  | -49.1  | -42.8     | -1399.3     | -4334.6     | -749.9  | -2576.1 | -627.3  | -1731.6 | -750.1   | -2577.6  | -627.8   | -1735.6  |
| c1mpyr-mes-p1  | -45.0  | -35.9     | -1538.1     | -4776.5     | -749.8  | -2576.2 | -767.7  | -2175.9 | -750.1   | -2578.0  | -768.5   | -2182.2  |
| c1mpyr-mes-p2  | -39.4  | -31.2     | -1535.9     | -4773.8     | -750.0  | -2576.6 | -767.7  | -2175.9 | -750.2   | -2578.2  | -768.4   | -2181.6  |
| c1mpyr-ntf2-p1 | -56.5  | -44.5     | -3208.8     | -9190.6     | -750.1  | -2576.0 | -2435.3 | -6581.5 | -750.4   | -2578.1  | -2436.4  | -6589.8  |
| c1mpyr-ntf2-p2 | -44.4  | -34.0     | -3203.9     | -9181.6     | -749.9  | -2575.7 | -2435.1 | -6580.4 | -750.1   | -2577.7  | -2436.1  | -6587.6  |
| c1mpyr-ntf2-p3 | -54.7  | -43.0     | -3208.1     | -9189.3     | -750.1  | -2576.1 | -2435.2 | -6581.2 | -750.4   | -2578.2  | -2436.3  | -6589.4  |
| c1mpyr-ntf2-p5 | -45.5  | -35.2     | -3204.6     | -9182.0     | -750.1  | -2576.0 | -2435.0 | -6580.1 | -750.3   | -2577.9  | -2436.0  | -6587.3  |
| c1mpyr-pf6-p1  | -38.1  | -29.6     | -1994.4     | -5968.4     | -749.8  | -2575.8 | -1228.6 | -3370.6 | -750.0   | -2577.4  | -1229.3  | -3376.6  |
| c1mpyr-pf6-p2  | -35.1  | -27.2     | -1993.2     | -5967.0     | -749.9  | -2576.0 | -1228.6 | -3370.7 | -750.1   | -2577.3  | -1229.3  | -3376.3  |
| c1mpyr-tos-p1  | -43.5  | -33.9     | -2192.3     | -6626.7     | -749.8  | -2576.2 | -1422.6 | -4026.9 | -750.1   | -2578.2  | -1423.4  | -4033.3  |
| c1mpyr-tos-p2  | -38.0  | -29.3     | -2189.6     | -6624.0     | -750.0  | -2576.4 | -1422.5 | -4026.8 | -750.2   | -2578.0  | -1423.3  | -4032.9  |



|               |       |       |         |         |        |         |         |         |        |         |         |         |
|---------------|-------|-------|---------|---------|--------|---------|---------|---------|--------|---------|---------|---------|
| c2mim-bf4-p1  | -39.7 | -31.8 | -1718.2 | -5070.3 | -897.4 | -2821.3 | -803.8  | -2226.3 | -897.7 | -2823.5 | -804.3  | -2231.1 |
| c2mim-bf4-p2  | -36.8 | -29.5 | -1716.4 | -5068.2 | -896.9 | -2820.6 | -803.8  | -2226.4 | -897.3 | -2822.7 | -804.3  | -2230.7 |
| c2mim-br-p1   | -61.2 | -43.9 | -1111.8 | -3310.3 | -898.9 | -2828.9 | -186.0  | -447.0  | -899.1 | -2829.8 | -190.3  | -459.1  |
| c2mim-br-p2   | -46.2 | -29.4 | -1106.4 | -3303.9 | -899.9 | -2831.1 | -186.0  | -447.0  | -900.0 | -2831.8 | -190.0  | -459.1  |
| c2mim-br-p3   | -46.4 | -29.9 | -1105.8 | -3302.8 | -899.2 | -2830.0 | -186.0  | -447.0  | -899.3 | -2830.7 | -190.0  | -458.7  |
| c2mim-br-p4   | -60.4 | -43.9 | -1112.3 | -3310.9 | -899.6 | -2830.0 | -186.0  | -447.0  | -899.8 | -2830.9 | -190.1  | -458.4  |
| c2mim-cl-p1   | -43.2 | -36.5 | -1054.8 | -3260.3 | -898.9 | -2828.8 | -136.2  | -408.0  | -899.0 | -2829.7 | -136.7  | -413.2  |
| c2mim-cl-p2   | -32.7 | -25.4 | -1052.1 | -3256.7 | -900.2 | -2831.7 | -136.2  | -408.0  | -900.3 | -2832.4 | -136.8  | -413.9  |
| c2mim-cl-p3   | -33.1 | -26.2 | -1051.4 | -3255.7 | -899.4 | -2830.5 | -136.2  | -408.0  | -899.5 | -2831.2 | -136.7  | -413.5  |
| c2mim-cl-p4   | -42.3 | -35.8 | -1054.9 | -3260.6 | -899.4 | -2829.6 | -136.2  | -408.0  | -899.5 | -2830.6 | -136.7  | -412.9  |
| c2mim-dca-p1  | -69.2 | -61.1 | -1561.3 | -4606.7 | -897.3 | -2821.7 | -633.2  | -1746.6 | -897.7 | -2824.2 | -633.8  | -1751.3 |
| c2mim-dca-p2  | -64.9 | -57.3 | -1559.9 | -4604.0 | -897.5 | -2821.8 | -633.3  | -1746.4 | -897.8 | -2824.1 | -633.8  | -1750.8 |
| c2mim-dca-p3  | -69.3 | -61.4 | -1562.5 | -4607.2 | -898.1 | -2822.5 | -633.4  | -1746.4 | -898.4 | -2824.9 | -634.0  | -1750.9 |
| c2mim-dca-p4  | -66.0 | -58.4 | -1560.1 | -4604.5 | -897.4 | -2821.7 | -633.3  | -1746.3 | -897.7 | -2824.1 | -633.8  | -1750.6 |
| c2mim-dca-p5  | -67.4 | -59.9 | -1560.9 | -4605.3 | -897.4 | -2821.8 | -633.4  | -1746.2 | -897.7 | -2824.2 | -633.9  | -1750.5 |
| c2mim-dca-p6  | -67.7 | -60.2 | -1560.7 | -4605.4 | -897.3 | -2821.4 | -633.4  | -1746.3 | -897.6 | -2823.8 | -633.9  | -1750.5 |
| c2mim-mes-p1  | -55.4 | -45.7 | -1690.9 | -5027.4 | -898.2 | -2822.6 | -767.6  | -2174.6 | -898.6 | -2825.1 | -768.4  | -2180.7 |
| c2mim-mes-p2  | -50.1 | -40.9 | -1687.6 | -5023.4 | -897.3 | -2821.3 | -767.7  | -2174.7 | -897.7 | -2823.8 | -768.4  | -2180.3 |
| c2mim-ntf2-p1 | -88.7 | -72.8 | -3371.8 | -9455.1 | -897.5 | -2821.5 | -2436.8 | -6582.4 | -898.1 | -2825.4 | -2438.2 | -6592.5 |
| c2mim-ntf2-p2 | -57.8 | -44.4 | -3358.8 | -9437.7 | -897.7 | -2823.2 | -2436.3 | -6581.6 | -898.2 | -2826.0 | -2437.6 | -6590.4 |
| c2mim-ntf2-p3 | -54.2 | -41.7 | -3358.0 | -9433.6 | -897.3 | -2822.0 | -2436.7 | -6581.4 | -897.7 | -2825.0 | -2437.8 | -6589.4 |
| c2mim-ntf2-p4 | -77.7 | -63.6 | -3367.6 | -9448.8 | -897.4 | -2821.4 | -2437.1 | -6582.8 | -897.9 | -2825.1 | -2438.3 | -6591.6 |
| c2mim-pf6-p1  | -45.2 | -35.9 | -2144.8 | -6217.5 | -897.3 | -2821.2 | -1228.4 | -3370.1 | -897.6 | -2823.5 | -1229.2 | -3376.1 |
| c2mim-pf6-p2  | -41.0 | -32.6 | -2142.5 | -6214.6 | -896.9 | -2820.6 | -1228.5 | -3370.2 | -897.2 | -2822.8 | -1229.1 | -3375.4 |
| c2mim-tos-p1  | -56.1 | -45.5 | -2346.2 | -6878.9 | -898.0 | -2822.3 | -1422.9 | -4025.8 | -898.4 | -2825.2 | -1423.8 | -4032.3 |
| c2mim-tos-p2  | -49.4 | -39.6 | -2342.5 | -6874.4 | -897.3 | -2821.3 | -1423.0 | -4025.9 | -897.7 | -2824.1 | -1423.7 | -4031.8 |
| c2mpyr-bf4-p1 | -37.8 | -29.8 | -1677.5 | -5187.0 | -858.0 | -2940.7 | -803.3  | -2224.7 | -858.2 | -2942.4 | -804.0  | -2230.1 |
| c2mpyr-bf4-p2 | -35.2 | -27.9 | -1677.0 | -5186.0 | -858.5 | -2941.2 | -803.3  | -2224.8 | -858.7 | -2942.8 | -803.9  | -2229.7 |
| c2mpyr-bf4-p3 | -34.9 | -27.5 | -1676.4 | -5185.7 | -858.1 | -2941.0 | -803.3  | -2224.7 | -858.3 | -2942.4 | -804.0  | -2229.9 |
| c2mpyr-br-p1  | -62.7 | -43.7 | -1071.5 | -3424.7 | -858.7 | -2941.8 | -186.0  | -447.0  | -858.7 | -2942.4 | -190.7  | -460.6  |
| c2mpyr-br-p2  | -60.5 | -42.1 | -1070.5 | -3424.0 | -858.6 | -2942.3 | -186.0  | -447.0  | -858.7 | -2942.9 | -190.6  | -460.3  |
| c2mpyr-br-p3  | -59.5 | -41.5 | -1070.0 | -3423.0 | -858.6 | -2941.9 | -186.0  | -447.0  | -858.6 | -2942.4 | -190.4  | -460.0  |
| c2mpyr-cl-p1  | -44.8 | -37.6 | -1014.9 | -3374.7 | -858.7 | -2941.8 | -136.2  | -408.0  | -858.8 | -2942.5 | -136.8  | -413.9  |
| c2mpyr-cl-p2  | -43.6 | -36.6 | -1014.1 | -3374.2 | -858.5 | -2942.1 | -136.2  | -408.0  | -858.5 | -2942.7 | -136.8  | -413.7  |
| c2mpyr-cl-p3  | -43.1 | -36.2 | -1014.1 | -3373.9 | -858.7 | -2942.0 | -136.2  | -408.0  | -858.8 | -2942.6 | -136.8  | -413.7  |
| c2mpyr-dca-p1 | -46.9 | -40.7 | -1507.4 | -4698.0 | -858.5 | -2941.4 | -627.3  | -1731.3 | -858.7 | -2943.0 | -627.8  | -1735.3 |
| c2mpyr-dca-p2 | -50.8 | -44.1 | -1508.5 | -4700.5 | -858.1 | -2941.1 | -627.3  | -1731.6 | -858.4 | -2942.7 | -627.9  | -1735.9 |
| c2mpyr-dca-p3 | -51.3 | -44.8 | -1508.6 | -4700.9 | -858.2 | -2941.1 | -627.3  | -1731.6 | -858.4 | -2942.7 | -627.8  | -1735.8 |
| c2mpyr-mes-p1 | -46.7 | -37.1 | -1646.9 | -5142.6 | -858.0 | -2941.1 | -767.7  | -2175.9 | -858.3 | -2943.0 | -768.5  | -2182.5 |



|                |       |       |         |         |         |         |         |         |         |         |         |         |
|----------------|-------|-------|---------|---------|---------|---------|---------|---------|---------|---------|---------|---------|
| c2mpyr-mes-p2  | -42.8 | -34.0 | -1645.8 | -5141.1 | -858.7  | -2941.6 | -767.7  | -2176.0 | -858.9  | -2943.4 | -768.5  | -2182.1 |
| c2mpyr-mes-p3  | -41.4 | -32.6 | -1644.7 | -5140.0 | -858.2  | -2941.5 | -767.7  | -2175.9 | -858.4  | -2943.2 | -768.4  | -2182.0 |
| c2mpyr-ntf2-p1 | -58.4 | -45.7 | -3317.9 | -9556.6 | -858.3  | -2940.7 | -2435.4 | -6581.7 | -858.7  | -2943.1 | -2436.7 | -6590.4 |
| c2mpyr-ntf2-p2 | -47.2 | -36.0 | -3313.2 | -9548.3 | -858.0  | -2940.5 | -2435.2 | -6580.6 | -858.3  | -2942.7 | -2436.2 | -6588.3 |
| c2mpyr-ntf2-p3 | -56.9 | -44.6 | -3317.1 | -9555.6 | -858.1  | -2940.8 | -2435.3 | -6581.5 | -858.5  | -2943.0 | -2436.5 | -6590.1 |
| c2mpyr-ntf2-p4 | -55.7 | -43.6 | -3316.5 | -9555.0 | -858.1  | -2940.8 | -2435.4 | -6581.6 | -858.4  | -2943.0 | -2436.6 | -6590.1 |
| c2mpyr-ntf2-p5 | -48.6 | -37.6 | -3313.6 | -9548.7 | -857.8  | -2940.5 | -2435.1 | -6580.4 | -858.1  | -2942.7 | -2436.1 | -6587.9 |
| c2mpyr-ntf2-p6 | -46.0 | -35.4 | -3313.0 | -9547.6 | -858.2  | -2940.8 | -2435.2 | -6580.5 | -858.5  | -2942.8 | -2436.2 | -6587.9 |
| c2mpyr-pf6-p1  | -38.6 | -29.8 | -2103.0 | -6333.8 | -858.2  | -2940.9 | -1228.6 | -3370.6 | -858.4  | -2942.6 | -1229.3 | -3376.7 |
| c2mpyr-pf6-p2  | -36.5 | -28.2 | -2102.2 | -6332.7 | -858.2  | -2940.9 | -1228.6 | -3370.7 | -858.4  | -2942.4 | -1229.3 | -3376.5 |
| c2mpyr-pf6-p3  | -36.0 | -27.7 | -2101.6 | -6332.5 | -858.1  | -2940.8 | -1228.6 | -3370.7 | -858.3  | -2942.2 | -1229.3 | -3376.6 |
| c2mpyr-tos-p1  | -45.5 | -35.2 | -2301.1 | -6992.8 | -858.0  | -2941.1 | -1422.6 | -4026.8 | -858.3  | -2943.2 | -1423.5 | -4033.7 |
| c2mpyr-tos-p2  | -41.7 | -32.3 | -2300.0 | -6991.4 | -858.6  | -2941.6 | -1422.6 | -4026.9 | -858.9  | -2943.5 | -1423.4 | -4033.3 |
| c3mim-bf4-p1   | -40.8 | -32.5 | -1823.6 | -5431.7 | -1002.4 | -3182.0 | -803.8  | -2226.4 | -1002.8 | -3184.3 | -804.4  | -2231.4 |
| c3mim-bf4-p2   | -39.6 | -31.7 | -1823.1 | -5431.1 | -1002.4 | -3182.0 | -803.8  | -2226.4 | -1002.8 | -3184.2 | -804.3  | -2231.2 |
| c3mim-br-p1    | -62.5 | -44.5 | -1217.3 | -3672.5 | -1004.0 | -3190.2 | -186.0  | -447.0  | -1004.2 | -3191.1 | -190.5  | -459.5  |
| c3mim-br-p2    | -47.1 | -29.7 | -1211.5 | -3665.6 | -1004.8 | -3192.2 | -186.0  | -447.0  | -1004.9 | -3192.9 | -190.1  | -459.5  |
| c3mim-br-p3    | -52.1 | -34.1 | -1213.5 | -3667.4 | -1004.4 | -3191.4 | -186.0  | -447.0  | -1004.5 | -3192.1 | -190.4  | -459.8  |
| c3mim-br-p4    | -63.0 | -45.2 | -1218.0 | -3673.3 | -1004.3 | -3190.9 | -186.0  | -447.0  | -1004.5 | -3191.9 | -190.4  | -459.3  |
| c3mim-cl-p1    | -43.9 | -36.9 | -1160.0 | -3621.9 | -1003.9 | -3189.9 | -136.2  | -408.0  | -1004.1 | -3190.9 | -136.7  | -413.4  |
| c3mim-cl-p2    | -33.0 | -25.6 | -1157.0 | -3618.1 | -1005.0 | -3192.8 | -136.2  | -408.0  | -1005.1 | -3193.5 | -136.8  | -414.0  |
| c3mim-cl-p3    | -36.6 | -29.3 | -1158.1 | -3619.0 | -1004.6 | -3191.8 | -136.2  | -408.0  | -1004.7 | -3192.6 | -136.8  | -413.8  |
| c3mim-cl-p4    | -43.5 | -36.6 | -1160.1 | -3622.2 | -1004.1 | -3190.5 | -136.2  | -408.0  | -1004.3 | -3191.5 | -136.7  | -413.2  |
| c3mim-dca-p1   | -70.5 | -62.0 | -1666.8 | -4968.1 | -1002.3 | -3182.2 | -633.3  | -1746.6 | -1002.7 | -3184.8 | -633.9  | -1751.5 |
| c3mim-dca-p2   | -71.8 | -63.4 | -1667.7 | -4969.4 | -1002.7 | -3182.9 | -633.3  | -1746.5 | -1003.1 | -3185.5 | -633.9  | -1751.3 |
| c3mim-dca-p3   | -61.2 | -53.0 | -1663.2 | -4964.1 | -1002.8 | -3183.8 | -633.1  | -1746.5 | -1003.1 | -3185.9 | -633.7  | -1751.6 |
| c3mim-dca-p4   | -73.1 | -64.5 | -1668.5 | -4969.2 | -1002.5 | -3182.4 | -633.3  | -1746.3 | -1002.9 | -3185.0 | -633.9  | -1751.3 |
| c3mim-dca-p5   | -69.3 | -61.3 | -1665.7 | -4966.7 | -1001.9 | -3181.7 | -633.2  | -1746.3 | -1002.3 | -3184.2 | -633.7  | -1750.8 |
| c3mim-dca-p6   | -67.9 | -60.4 | -1665.4 | -4966.0 | -1002.0 | -3181.7 | -633.4  | -1746.4 | -1002.3 | -3184.1 | -633.9  | -1750.6 |
| c3mim-mes-p1   | -58.4 | -47.9 | -1797.5 | -5390.1 | -1003.3 | -3183.6 | -767.7  | -2174.6 | -1003.7 | -3186.2 | -768.5  | -2181.2 |
| c3mim-mes-p2   | -50.7 | -41.3 | -1792.6 | -5384.3 | -1002.1 | -3181.6 | -767.7  | -2174.7 | -1002.5 | -3184.2 | -768.4  | -2180.5 |
| c3mim-ntf2-p1  | -93.0 | -75.9 | -3478.6 | -9818.5 | -1002.5 | -3182.1 | -2436.8 | -6582.5 | -1003.1 | -3186.3 | -2438.3 | -6593.4 |
| c3mim-ntf2-p2  | -62.9 | -48.4 | -3466.0 | -9801.2 | -1002.7 | -3183.7 | -2436.3 | -6581.5 | -1003.2 | -3186.7 | -2437.7 | -6591.2 |
| c3mim-ntf2-p3  | -56.6 | -43.3 | -3464.0 | -9795.6 | -1002.2 | -3182.6 | -2436.8 | -6581.4 | -1002.7 | -3185.8 | -2437.9 | -6589.9 |
| c3mim-ntf2-p4  | -79.4 | -65.1 | -3472.7 | -9810.0 | -1002.0 | -3181.3 | -2437.1 | -6582.9 | -1002.6 | -3185.0 | -2438.3 | -6591.7 |
| c3mim-pf6-p1   | -46.2 | -36.9 | -2249.8 | -6578.5 | -1002.2 | -3181.6 | -1228.4 | -3369.9 | -1002.5 | -3184.0 | -1229.1 | -3375.8 |
| c3mim-pf6-p2   | -41.3 | -32.7 | -2247.3 | -6575.2 | -1001.7 | -3180.9 | -1228.5 | -3370.2 | -1002.1 | -3183.2 | -1229.1 | -3375.5 |
| c3mim-tos-p1   | -59.8 | -48.2 | -2452.9 | -7242.0 | -1003.1 | -3183.2 | -1422.9 | -4025.8 | -1003.6 | -3186.3 | -1423.9 | -4032.9 |
| c3mim-tos-p2   | -56.5 | -45.5 | -2451.0 | -7239.8 | -1002.8 | -3182.7 | -1422.9 | -4025.9 | -1003.3 | -3185.7 | -1423.8 | -4032.5 |



|                |       |       |         |         |         |         |         |         |         |         |         |         |
|----------------|-------|-------|---------|---------|---------|---------|---------|---------|---------|---------|---------|---------|
| c3mpyr-bf4-p1  | -38.4 | -30.2 | -1782.7 | -5548.8 | -962.9  | -3302.1 | -803.3  | -2224.7 | -963.2  | -3303.9 | -804.0  | -2230.3 |
| c3mpyr-bf4-p2  | -35.6 | -28.0 | -1781.9 | -5547.5 | -963.3  | -3302.4 | -803.3  | -2224.8 | -963.5  | -3304.0 | -804.0  | -2229.9 |
| c3mpyr-bf4-p3  | -35.5 | -27.8 | -1781.4 | -5547.4 | -963.0  | -3302.3 | -803.3  | -2224.7 | -963.2  | -3303.9 | -804.0  | -2230.0 |
| c3mpyr-br-p1   | -64.1 | -44.5 | -1177.0 | -3787.0 | -963.6  | -3303.2 | -186.0  | -447.0  | -963.7  | -3303.8 | -190.8  | -461.1  |
| c3mpyr-br-p2   | -60.5 | -41.9 | -1175.3 | -3785.0 | -963.5  | -3303.2 | -186.0  | -447.0  | -963.6  | -3303.9 | -190.6  | -460.4  |
| c3mpyr-br-p3   | -60.8 | -42.2 | -1175.5 | -3785.3 | -963.5  | -3303.3 | -186.0  | -447.0  | -963.6  | -3303.9 | -190.6  | -460.4  |
| c3mpyr-cl-p1   | -45.5 | -38.1 | -1120.0 | -3736.5 | -963.7  | -3303.2 | -136.2  | -408.0  | -963.7  | -3303.9 | -136.8  | -414.0  |
| c3mpyr-cl-p2   | -44.0 | -36.8 | -1119.2 | -3735.7 | -963.4  | -3303.4 | -136.2  | -408.0  | -963.5  | -3304.0 | -136.8  | -413.8  |
| c3mpyr-cl-p3   | -43.7 | -36.6 | -1119.2 | -3735.6 | -963.6  | -3303.4 | -136.2  | -408.0  | -963.7  | -3304.0 | -136.8  | -413.8  |
| c3mpyr-dca-p1  | -48.4 | -41.9 | -1612.7 | -5060.2 | -963.2  | -3302.5 | -627.4  | -1731.5 | -963.4  | -3304.2 | -627.8  | -1735.6 |
| c3mpyr-dca-p2  | -50.9 | -44.1 | -1613.4 | -5061.9 | -963.1  | -3302.5 | -627.3  | -1731.6 | -963.3  | -3304.1 | -627.9  | -1736.0 |
| c3mpyr-dca-p3  | -46.8 | -39.9 | -1610.3 | -5062.0 | -963.2  | -3302.5 | -627.4  | -1732.5 | -963.4  | -3304.1 | -628.0  | -1737.0 |
| c3mpyr-dca-p4  | -49.4 | -42.9 | -1612.7 | -5061.3 | -963.3  | -3302.6 | -627.2  | -1731.5 | -963.5  | -3304.2 | -627.7  | -1735.7 |
| c3mpyr-dca-p5  | -51.4 | -44.8 | -1613.5 | -5062.3 | -963.1  | -3302.5 | -627.3  | -1731.6 | -963.3  | -3304.1 | -627.8  | -1735.8 |
| c3mpyr-mes-p1  | -47.8 | -37.9 | -1752.1 | -5504.7 | -962.9  | -3302.4 | -767.7  | -2175.9 | -963.2  | -3304.4 | -768.5  | -2182.7 |
| c3mpyr-mes-p2  | -43.3 | -34.2 | -1750.8 | -5502.8 | -963.6  | -3302.9 | -767.7  | -2176.0 | -963.8  | -3304.7 | -768.5  | -2182.3 |
| c3mpyr-mes-p3  | -42.6 | -33.4 | -1750.1 | -5502.1 | -963.1  | -3302.8 | -767.7  | -2175.9 | -963.4  | -3304.7 | -768.5  | -2182.2 |
| c3mpyr-ntf2-p1 | -61.0 | -47.7 | -3423.9 | -9919.8 | -963.3  | -3302.3 | -2435.4 | -6581.7 | -963.7  | -3304.8 | -2436.7 | -6590.9 |
| c3mpyr-ntf2-p2 | -47.2 | -35.9 | -3418.3 | -9909.5 | -963.0  | -3302.0 | -2435.1 | -6580.5 | -963.3  | -3304.2 | -2436.2 | -6588.2 |
| c3mpyr-ntf2-p3 | -57.5 | -44.8 | -3422.2 | -9917.3 | -963.0  | -3302.1 | -2435.4 | -6581.6 | -963.3  | -3304.4 | -2436.6 | -6590.4 |
| c3mpyr-ntf2-p4 | -58.4 | -45.5 | -3422.5 | -9917.9 | -963.1  | -3302.2 | -2435.3 | -6581.5 | -963.4  | -3304.6 | -2436.6 | -6590.4 |
| c3mpyr-ntf2-p5 | -48.8 | -37.5 | -3418.5 | -9910.2 | -962.7  | -3301.8 | -2435.0 | -6580.3 | -963.1  | -3304.1 | -2436.0 | -6588.0 |
| c3mpyr-ntf2-p6 | -48.0 | -36.9 | -3418.7 | -9910.2 | -963.1  | -3302.2 | -2435.1 | -6580.4 | -963.4  | -3304.3 | -2436.2 | -6588.1 |
| c3mpyr-pf6-p1  | -40.2 | -30.9 | -2208.2 | -6696.0 | -962.8  | -3302.0 | -1228.6 | -3370.6 | -963.1  | -3303.7 | -1229.4 | -3377.1 |
| c3mpyr-pf6-p2  | -36.6 | -28.1 | -2207.0 | -6694.1 | -963.1  | -3302.2 | -1228.6 | -3370.6 | -963.3  | -3303.8 | -1229.3 | -3376.6 |
| c3mpyr-pf6-p3  | -36.8 | -28.2 | -2206.8 | -6694.4 | -962.9  | -3302.1 | -1228.6 | -3370.7 | -963.2  | -3303.6 | -1229.4 | -3376.8 |
| c3mpyr-tos-p1  | -46.8 | -36.2 | -2406.4 | -7355.1 | -962.9  | -3302.4 | -1422.5 | -4026.8 | -963.2  | -3304.6 | -1423.5 | -4034.0 |
| c3mpyr-tos-p2  | -42.3 | -32.5 | -2405.0 | -7353.1 | -963.5  | -3302.9 | -1422.5 | -4026.9 | -963.8  | -3304.9 | -1423.4 | -4033.5 |
| c4mim-bf4-p1   | -41.5 | -32.9 | -1928.8 | -5792.8 | -1107.3 | -3542.7 | -803.8  | -2226.3 | -1107.7 | -3544.9 | -804.4  | -2231.6 |
| c4mim-bf4-p2   | -39.9 | -31.8 | -1928.0 | -5791.8 | -1107.3 | -3542.5 | -803.8  | -2226.4 | -1107.6 | -3544.7 | -804.4  | -2231.3 |
| c4mim-br-p1    | -64.1 | -45.4 | -1322.8 | -4034.6 | -1108.9 | -3551.4 | -186.0  | -447.0  | -1109.0 | -3552.4 | -190.6  | -460.0  |
| c4mim-br-p2    | -48.6 | -30.7 | -1317.0 | -4027.7 | -1109.7 | -3553.4 | -186.0  | -447.0  | -1109.8 | -3554.1 | -190.3  | -459.9  |
| c4mim-br-p3    | -54.7 | -35.8 | -1319.5 | -4030.2 | -1109.3 | -3552.6 | -186.0  | -447.0  | -1109.4 | -3553.4 | -190.7  | -460.4  |
| c4mim-br-p4    | -64.1 | -45.7 | -1323.2 | -4035.0 | -1109.1 | -3551.9 | -186.0  | -447.0  | -1109.3 | -3552.9 | -190.6  | -459.7  |
| c4mim-cl-p1    | -44.7 | -37.4 | -1265.1 | -3983.6 | -1108.7 | -3551.1 | -136.2  | -408.0  | -1108.9 | -3552.1 | -136.8  | -413.5  |
| c4mim-cl-p2    | -33.7 | -26.1 | -1262.1 | -3979.7 | -1109.9 | -3554.0 | -136.2  | -408.0  | -1110.0 | -3554.7 | -136.8  | -414.1  |
| c4mim-cl-p3    | -38.2 | -30.6 | -1263.7 | -3981.1 | -1109.4 | -3553.0 | -136.2  | -408.0  | -1109.5 | -3553.8 | -136.8  | -414.0  |
| c4mim-cl-p4    | -44.0 | -37.0 | -1265.1 | -3983.6 | -1108.9 | -3551.6 | -136.2  | -408.0  | -1109.1 | -3552.6 | -136.7  | -413.3  |
| c4mim-dca-p1   | -71.4 | -62.6 | -1772.0 | -5329.3 | -1107.2 | -3542.8 | -633.3  | -1746.7 | -1107.6 | -3545.4 | -633.9  | -1751.7 |



|                |       |       |         |          |         |         |         |         |         |         |         |         |
|----------------|-------|-------|---------|----------|---------|---------|---------|---------|---------|---------|---------|---------|
| c4mim-dca-p2   | -75.0 | -66.0 | -1774.2 | -5331.0  | -1107.4 | -3543.1 | -633.3  | -1746.3 | -1107.8 | -3545.8 | -634.0  | -1751.6 |
| c4mim-dca-p3   | -69.6 | -61.6 | -1770.6 | -5327.5  | -1106.7 | -3542.2 | -633.2  | -1746.4 | -1107.1 | -3544.7 | -633.7  | -1750.9 |
| c4mim-mes-p1   | -59.9 | -49.0 | -1902.9 | -5751.6  | -1108.2 | -3544.1 | -767.7  | -2174.6 | -1108.6 | -3546.9 | -768.5  | -2181.5 |
| c4mim-mes-p2   | -50.9 | -41.4 | -1897.4 | -5744.9  | -1106.9 | -3542.0 | -767.7  | -2174.7 | -1107.3 | -3544.6 | -768.4  | -2180.6 |
| c4mim-pf6-p1   | -48.7 | -38.4 | -2356.2 | -6941.1  | -1107.3 | -3542.7 | -1228.4 | -3370.1 | -1107.6 | -3545.1 | -1229.3 | -3376.9 |
| c4mim-pf6-p2   | -41.4 | -32.7 | -2352.1 | -6935.8  | -1106.5 | -3541.4 | -1228.5 | -3370.2 | -1106.9 | -3543.6 | -1229.1 | -3375.6 |
| c4mim-tos-p1   | -62.4 | -50.3 | -2558.9 | -7604.3  | -1108.0 | -3543.9 | -1422.9 | -4025.8 | -1108.5 | -3547.1 | -1423.9 | -4033.3 |
| c4mim-tos-p2   | -57.6 | -46.5 | -2556.8 | -7601.3  | -1108.0 | -3543.7 | -1423.0 | -4025.9 | -1108.4 | -3546.7 | -1423.9 | -4032.6 |
| c4mpyr-bf4-p1  | -38.6 | -30.3 | -1887.5 | -5909.9  | -1067.7 | -3663.0 | -803.3  | -2224.7 | -1067.9 | -3664.8 | -804.0  | -2230.4 |
| c4mpyr-bf4-p2  | -35.8 | -28.2 | -1886.7 | -5908.6  | -1068.0 | -3663.3 | -803.3  | -2224.8 | -1068.2 | -3664.9 | -804.0  | -2230.0 |
| c4mpyr-bf4-p3  | -35.8 | -28.0 | -1886.3 | -5908.6  | -1067.8 | -3663.2 | -803.3  | -2224.8 | -1068.0 | -3664.8 | -804.0  | -2230.1 |
| c4mpyr-br-p1   | -64.6 | -44.7 | -1281.9 | -4148.2  | -1068.4 | -3664.0 | -186.0  | -447.0  | -1068.5 | -3664.7 | -190.9  | -461.3  |
| c4mpyr-br-p2   | -61.2 | -42.1 | -1280.2 | -4146.4  | -1068.2 | -3664.1 | -186.0  | -447.0  | -1068.3 | -3664.8 | -190.7  | -460.7  |
| c4mpyr-br-p3   | -61.4 | -42.5 | -1280.4 | -4146.5  | -1068.3 | -3664.2 | -186.0  | -447.0  | -1068.4 | -3664.8 | -190.7  | -460.6  |
| c4mpyr-cl-p1   | -45.5 | -38.1 | -1224.8 | -4097.4  | -1068.4 | -3664.1 | -136.2  | -408.0  | -1068.5 | -3664.7 | -136.8  | -414.0  |
| c4mpyr-cl-p2   | -44.6 | -37.3 | -1224.2 | -4097.2  | -1068.2 | -3664.4 | -136.2  | -408.0  | -1068.3 | -3665.1 | -136.8  | -414.0  |
| c4mpyr-cl-p3   | -43.7 | -36.6 | -1223.9 | -4096.5  | -1068.4 | -3664.2 | -136.2  | -408.0  | -1068.4 | -3664.8 | -136.8  | -413.8  |
| c4mpyr-dca-p1  | -48.9 | -42.0 | -1716.6 | -5422.2  | -1067.9 | -3663.1 | -627.3  | -1731.7 | -1068.1 | -3664.8 | -627.8  | -1736.1 |
| c4mpyr-dca-p2  | -50.9 | -44.0 | -1718.2 | -5423.0  | -1067.9 | -3663.4 | -627.3  | -1731.6 | -1068.1 | -3665.1 | -627.9  | -1736.1 |
| c4mpyr-dca-p3  | -49.4 | -42.7 | -1717.7 | -5421.7  | -1067.9 | -3663.3 | -627.3  | -1731.5 | -1068.1 | -3665.0 | -627.8  | -1735.7 |
| c4mpyr-dca-p4  | -50.5 | -43.4 | -1717.5 | -5423.0  | -1067.8 | -3663.4 | -627.3  | -1731.6 | -1068.1 | -3665.1 | -627.8  | -1736.1 |
| c4mpyr-dca-p5  | -51.6 | -44.9 | -1718.3 | -5423.4  | -1067.9 | -3663.3 | -627.3  | -1731.6 | -1068.1 | -3665.0 | -627.8  | -1735.9 |
| c4mpyr-mes-p1  | -48.0 | -37.9 | -1856.9 | -5865.7  | -1067.7 | -3663.3 | -767.7  | -2175.9 | -1068.0 | -3665.3 | -768.6  | -2182.8 |
| c4mpyr-mes-p2  | -44.0 | -34.6 | -1855.7 | -5864.1  | -1068.3 | -3663.9 | -767.7  | -2176.0 | -1068.6 | -3665.7 | -768.5  | -2182.5 |
| c4mpyr-mes-p3  | -43.0 | -33.6 | -1855.0 | -5863.3  | -1067.9 | -3663.8 | -767.7  | -2175.9 | -1068.2 | -3665.6 | -768.5  | -2182.3 |
| c4mpyr-ntf2-p1 | -61.4 | -47.7 | -3528.6 | -10280.8 | -1068.0 | -3663.1 | -2435.4 | -6581.6 | -1068.4 | -3665.7 | -2436.7 | -6591.0 |
| c4mpyr-ntf2-p2 | -53.0 | -40.4 | -3525.1 | -10273.5 | -1067.7 | -3662.8 | -2435.0 | -6580.1 | -1068.0 | -3665.3 | -2436.2 | -6588.7 |
| c4mpyr-ntf2-p3 | -59.0 | -45.9 | -3527.6 | -10279.2 | -1067.7 | -3663.1 | -2435.4 | -6581.6 | -1068.1 | -3665.5 | -2436.7 | -6590.7 |
| c4mpyr-ntf2-p4 | -59.8 | -46.5 | -3527.9 | -10279.8 | -1067.8 | -3663.1 | -2435.3 | -6581.6 | -1068.2 | -3665.5 | -2436.7 | -6590.8 |
| c4mpyr-ntf2-p5 | -49.7 | -38.2 | -3523.5 | -10271.7 | -1067.5 | -3662.8 | -2435.0 | -6580.3 | -1067.8 | -3665.1 | -2436.1 | -6588.2 |
| c4mpyr-ntf2-p6 | -50.0 | -38.3 | -3524.2 | -10272.2 | -1067.9 | -3663.1 | -2435.1 | -6580.3 | -1068.2 | -3665.3 | -2436.2 | -6588.4 |
| c4mpyr-pf6-p1  | -40.5 | -30.9 | -2313.0 | -7057.1  | -1067.6 | -3662.9 | -1228.6 | -3370.6 | -1067.9 | -3664.6 | -1229.4 | -3377.3 |
| c4mpyr-pf6-p2  | -37.2 | -28.5 | -2312.0 | -7055.5  | -1067.9 | -3663.1 | -1228.6 | -3370.6 | -1068.1 | -3664.7 | -1229.4 | -3376.8 |
| c4mpyr-pf6-p3  | -37.2 | -28.4 | -2311.7 | -7055.6  | -1067.7 | -3663.1 | -1228.6 | -3370.7 | -1067.9 | -3664.6 | -1229.4 | -3377.0 |
| c4mpyr-tos-p1  | -47.2 | -36.4 | -2511.4 | -7716.3  | -1067.8 | -3663.4 | -1422.5 | -4026.8 | -1068.1 | -3665.6 | -1423.5 | -4034.1 |
| c4mpyr-tos-p2  | -43.1 | -33.1 | -2510.1 | -7714.6  | -1068.3 | -3663.8 | -1422.6 | -4026.8 | -1068.6 | -3665.9 | -1423.5 | -4033.6 |



## 2.2.12 CCQ basis set

Table S 13: Raw CCQ energies. Superscript \* indicates monomer calculated in the dimer basis set.

| ion pair       | E(int) | E(int) CP | E(dimer) SS | E(dimer) OS | E(A) SS | E(A) OS | E(B) SS | E(B) OS | E(A) SS* | E(A) OS* | E(B) SS* | E(B) OS* |
|----------------|--------|-----------|-------------|-------------|---------|---------|---------|---------|----------|----------|----------|----------|
| clmim-bf4-p1   | -34.9  | -29.3     | -1653.6     | -5010.1     | -809.3  | -2596.4 | -828.2  | -2394.7 | -809.5   | -2597.1  | -829.6   | -2398.2  |
| clmim-br-p1    | -50.8  | -43.5     | -1073.8     | -3199.1     | -811.3  | -2603.8 | -238.6  | -568.3  | -811.4   | -2604.2  | -240.5   | -573.3   |
| clmim-br-p2    | -33.9  | -27.6     | -1066.1     | -3189.4     | -811.0  | -2603.7 | -238.6  | -568.3  | -811.0   | -2603.9  | -240.3   | -572.8   |
| clmim-cl-p1    | -41.1  | -35.8     | -968.6      | -3067.3     | -811.1  | -2603.5 | -138.0  | -442.1  | -811.2   | -2603.9  | -139.1   | -445.8   |
| clmim-cl-p2    | -30.2  | -25.7     | -964.4      | -3061.3     | -811.2  | -2604.2 | -138.0  | -442.1  | -811.2   | -2604.4  | -138.8   | -445.5   |
| clmim-dca-p1   | -63.4  | -59.4     | -1486.5     | -4474.1     | -809.8  | -2597.6 | -646.8  | -1842.9 | -809.9   | -2598.3  | -647.6   | -1845.3  |
| clmim-dca-p2   | -47.1  | -43.7     | -1479.0     | -4466.0     | -809.9  | -2598.6 | -646.5  | -1842.9 | -810.0   | -2599.0  | -647.2   | -1845.2  |
| clmim-mes-p1   | -47.2  | -40.2     | -1619.1     | -4934.5     | -809.8  | -2597.3 | -786.4  | -2312.9 | -810.0   | -2597.9  | -788.2   | -2317.3  |
| clmim-ntf2-p1  | -73.1  | -66.1     | -3350.2     | -9682.6     | -809.4  | -2596.5 | -2507.0 | -7046.7 | -809.5   | -2597.5  | -2508.6  | -7051.1  |
| clmim-ntf2-p2  | -40.6  | -35.4     | -3335.6     | -9664.0     | -809.6  | -2598.2 | -2506.2 | -7045.0 | -809.7   | -2598.6  | -2507.4  | -7048.6  |
| clmim-ntf2-p3  | -44.2  | -38.6     | -3338.2     | -9665.3     | -809.4  | -2597.2 | -2507.0 | -7045.8 | -809.5   | -2597.9  | -2508.2  | -7049.3  |
| clmim-pf6-p1   | -37.6  | -31.6     | -2092.1     | -6240.4     | -809.3  | -2596.5 | -1265.5 | -3623.6 | -809.5   | -2597.1  | -1267.0  | -3627.3  |
| clmim-tos-p1   | -44.3  | -38.0     | -2287.1     | -6885.1     | -809.5  | -2597.0 | -1455.9 | -4265.4 | -809.7   | -2597.7  | -1457.4  | -4269.4  |
| clmpyr-bf4-p1  | -34.9  | -29.3     | -1610.0     | -5121.2     | -765.7  | -2709.4 | -827.9  | -2393.3 | -765.7   | -2709.8  | -829.3   | -2397.0  |
| clmpyr-bf4-p2  | -32.2  | -27.1     | -1608.7     | -5120.1     | -765.8  | -2709.6 | -827.9  | -2393.3 | -765.9   | -2709.9  | -829.2   | -2396.8  |
| clmpyr-br-p1   | -51.3  | -44.2     | -1028.8     | -3306.3     | -766.4  | -2710.5 | -238.6  | -568.3  | -766.4   | -2710.6  | -240.5   | -573.3   |
| clmpyr-br-p2   | -48.9  | -42.2     | -1027.6     | -3305.3     | -766.4  | -2710.7 | -238.6  | -568.3  | -766.4   | -2710.8  | -240.4   | -573.1   |
| clmpyr-cl-p1   | -43.8  | -38.8     | -925.0      | -3175.9     | -766.4  | -2710.5 | -138.0  | -442.1  | -766.5   | -2710.7  | -139.1   | -445.8   |
| clmpyr-cl-p2   | -42.6  | -37.8     | -924.3      | -3175.5     | -766.4  | -2710.7 | -138.0  | -442.1  | -766.4   | -2710.9  | -139.0   | -445.7   |
| clmpyr-dca-p1  | -43.9  | -40.7     | -1428.7     | -4561.2     | -766.2  | -2710.2 | -641.0  | -1828.7 | -766.3   | -2710.5  | -641.7   | -1830.8  |
| clmpyr-dca-p2  | -47.7  | -44.5     | -1429.9     | -4563.7     | -766.0  | -2709.9 | -640.9  | -1829.0 | -766.1   | -2710.2  | -641.6   | -1831.1  |
| clmpyr-dca-p3  | -44.5  | -41.3     | -1426.8     | -4563.5     | -765.8  | -2709.7 | -640.9  | -1829.5 | -765.8   | -2710.0  | -641.5   | -1831.7  |
| clmpyr-dca-p4  | -46.2  | -43.0     | -1428.8     | -4562.8     | -765.8  | -2709.7 | -641.0  | -1829.0 | -765.8   | -2710.0  | -641.7   | -1831.1  |
| clmpyr-mes-p1  | -43.3  | -36.6     | -1573.4     | -5045.5     | -765.7  | -2709.7 | -786.4  | -2313.9 | -765.7   | -2710.1  | -788.1   | -2318.4  |
| clmpyr-mes-p2  | -38.4  | -32.4     | -1571.2     | -5043.3     | -765.9  | -2710.1 | -786.3  | -2313.9 | -765.9   | -2710.4  | -787.9   | -2317.9  |
| clmpyr-ntf2-p1 | -50.0  | -44.6     | -3294.6     | -9782.0     | -766.0  | -2709.5 | -2505.4 | -7045.7 | -766.1   | -2709.9  | -2506.7  | -7049.3  |
| clmpyr-ntf2-p2 | -38.7  | -34.0     | -3289.8     | -9774.0     | -765.7  | -2709.3 | -2505.3 | -7044.8 | -765.8   | -2709.7  | -2506.4  | -7047.9  |
| clmpyr-ntf2-p3 | -48.5  | -43.3     | -3293.9     | -9781.0     | -766.0  | -2709.7 | -2505.3 | -7045.4 | -766.1   | -2710.0  | -2506.5  | -7048.9  |
| clmpyr-ntf2-p5 | -39.9  | -35.2     | -3290.5     | -9774.6     | -765.9  | -2709.5 | -2505.2 | -7044.5 | -766.0   | -2709.9  | -2506.3  | -7047.7  |
| clmpyr-pf6-p1  | -35.2  | -29.5     | -2047.7     | -6352.0     | -765.7  | -2709.4 | -1265.6 | -3623.9 | -765.7   | -2709.7  | -1267.1  | -3627.7  |
| clmpyr-pf6-p2  | -32.6  | -27.3     | -2046.5     | -6350.9     | -765.8  | -2709.5 | -1265.6 | -3624.0 | -765.8   | -2709.8  | -1267.0  | -3627.5  |
| clmpyr-tos-p1  | -40.2  | -34.2     | -2241.3     | -6995.6     | -765.7  | -2709.8 | -1455.3 | -4265.9 | -765.8   | -2710.1  | -1456.8  | -4270.0  |
| clmpyr-tos-p2  | -35.2  | -29.7     | -2238.6     | -6993.4     | -765.8  | -2709.9 | -1455.3 | -4265.9 | -765.9   | -2710.2  | -1456.6  | -4269.6  |



|               |       |       |         |          |        |         |         |         |        |         |         |         |
|---------------|-------|-------|---------|----------|--------|---------|---------|---------|--------|---------|---------|---------|
| c2mim-bf4-p1  | -37.1 | -31.0 | -1763.3 | -5391.1  | -917.9 | -2976.4 | -828.2  | -2394.7 | -918.0 | -2977.0 | -829.7  | -2398.5 |
| c2mim-bf4-p2  | -34.5 | -28.9 | -1761.5 | -5389.2  | -917.4 | -2975.8 | -828.2  | -2394.7 | -917.6 | -2976.4 | -829.6  | -2398.3 |
| c2mim-br-p1   | -52.6 | -44.8 | -1182.4 | -3579.6  | -919.3 | -2983.1 | -238.6  | -568.3  | -919.3 | -2983.5 | -240.7  | -573.6  |
| c2mim-br-p2   | -38.2 | -31.1 | -1177.3 | -3573.0  | -920.2 | -2985.0 | -238.6  | -568.3  | -920.3 | -2985.2 | -240.5  | -573.3  |
| c2mim-br-p3   | -38.4 | -31.6 | -1176.7 | -3572.2  | -919.4 | -2984.0 | -238.6  | -568.3  | -919.5 | -2984.2 | -240.4  | -573.1  |
| c2mim-br-p4   | -52.3 | -44.8 | -1183.1 | -3580.5  | -920.0 | -2984.3 | -238.6  | -568.3  | -920.0 | -2984.7 | -240.6  | -573.4  |
| c2mim-cl-p1   | -43.0 | -37.4 | -1077.5 | -3447.9  | -919.2 | -2983.0 | -138.0  | -442.1  | -919.3 | -2983.4 | -139.2  | -446.1  |
| c2mim-cl-p2   | -32.9 | -27.9 | -1074.9 | -3444.1  | -920.5 | -2985.5 | -138.0  | -442.1  | -920.5 | -2985.8 | -139.0  | -445.8  |
| c2mim-cl-p3   | -33.5 | -28.5 | -1074.3 | -3443.5  | -919.7 | -2984.5 | -138.0  | -442.1  | -919.7 | -2984.7 | -139.0  | -445.8  |
| c2mim-cl-p4   | -42.1 | -36.7 | -1077.6 | -3448.3  | -919.7 | -2983.9 | -138.0  | -442.1  | -919.8 | -2984.3 | -139.2  | -445.9  |
| c2mim-dca-p1  | -65.0 | -60.8 | -1594.9 | -4854.5  | -917.8 | -2976.7 | -646.7  | -1843.2 | -917.9 | -2977.4 | -647.6  | -1845.8 |
| c2mim-dca-p2  | -61.1 | -57.0 | -1593.6 | -4852.1  | -918.0 | -2976.8 | -646.8  | -1843.1 | -918.1 | -2977.4 | -647.6  | -1845.5 |
| c2mim-dca-p3  | -65.3 | -61.1 | -1596.1 | -4855.1  | -918.5 | -2977.5 | -646.9  | -1843.0 | -918.6 | -2978.1 | -647.7  | -1845.6 |
| c2mim-dca-p4  | -62.1 | -58.1 | -1593.8 | -4852.7  | -917.8 | -2976.8 | -646.8  | -1843.0 | -918.0 | -2977.4 | -647.6  | -1845.4 |
| c2mim-dca-p5  | -63.5 | -59.4 | -1594.6 | -4853.5  | -917.8 | -2976.9 | -646.9  | -1842.9 | -918.0 | -2977.6 | -647.7  | -1845.4 |
| c2mim-dca-p6  | -63.9 | -59.7 | -1594.3 | -4853.6  | -917.7 | -2976.5 | -646.9  | -1843.0 | -917.9 | -2977.2 | -647.7  | -1845.5 |
| c2mim-mes-p1  | -53.0 | -45.4 | -1730.6 | -5317.7  | -918.6 | -2977.6 | -786.3  | -2312.7 | -918.8 | -2978.2 | -788.3  | -2317.6 |
| c2mim-mes-p2  | -47.8 | -40.7 | -1727.3 | -5314.1  | -917.8 | -2976.4 | -786.4  | -2312.9 | -917.9 | -2977.1 | -788.2  | -2317.4 |
| c2mim-ntf2-p1 | -79.5 | -71.7 | -3461.8 | -10065.9 | -917.9 | -2976.5 | -2507.0 | -7046.7 | -918.1 | -2977.5 | -2508.8 | -7051.6 |
| c2mim-ntf2-p2 | -51.2 | -45.0 | -3449.2 | -10050.6 | -918.2 | -2978.0 | -2506.5 | -7045.9 | -918.3 | -2978.5 | -2507.9 | -7050.1 |
| c2mim-ntf2-p3 | -47.6 | -41.5 | -3448.3 | -10046.6 | -917.7 | -2976.9 | -2507.0 | -7045.7 | -917.8 | -2977.6 | -2508.3 | -7049.6 |
| c2mim-ntf2-p4 | -70.0 | -62.9 | -3457.7 | -10060.8 | -917.9 | -2976.5 | -2507.3 | -7047.0 | -918.0 | -2977.4 | -2508.9 | -7051.4 |
| c2mim-pf6-p1  | -41.6 | -34.9 | -2202.4 | -6622.2  | -917.8 | -2976.3 | -1265.4 | -3623.5 | -917.9 | -2976.9 | -1267.2 | -3627.8 |
| c2mim-pf6-p2  | -37.8 | -31.8 | -2200.1 | -6619.8  | -917.4 | -2975.7 | -1265.5 | -3623.6 | -917.5 | -2976.3 | -1267.0 | -3627.3 |
| c2mim-tos-p1  | -51.8 | -44.7 | -2399.6 | -7269.2  | -918.5 | -2977.4 | -1455.8 | -4265.3 | -918.6 | -2978.1 | -1457.6 | -4269.8 |
| c2mim-tos-p2  | -45.6 | -39.0 | -2396.0 | -7265.2  | -917.8 | -2976.5 | -1455.9 | -4265.4 | -917.9 | -2977.2 | -1457.5 | -4269.5 |
| c2mpyr-bf4-p1 | -35.5 | -29.7 | -1720.4 | -5504.0  | -875.9 | -3092.0 | -827.9  | -2393.3 | -875.9 | -3092.3 | -829.3  | -2397.1 |
| c2mpyr-bf4-p2 | -33.2 | -27.9 | -1719.9 | -5503.3  | -876.4 | -3092.4 | -827.9  | -2393.3 | -876.4 | -3092.7 | -829.2  | -2396.9 |
| c2mpyr-bf4-p3 | -33.0 | -27.7 | -1719.2 | -5503.0  | -876.0 | -3092.1 | -827.9  | -2393.3 | -876.0 | -3092.5 | -829.2  | -2396.9 |
| c2mpyr-br-p1  | -52.3 | -45.0 | -1139.4 | -3689.3  | -876.6 | -3092.9 | -238.6  | -568.3  | -876.6 | -3093.1 | -240.6  | -573.5  |
| c2mpyr-br-p2  | -50.5 | -43.4 | -1138.6 | -3688.8  | -876.5 | -3093.4 | -238.6  | -568.3  | -876.5 | -3093.6 | -240.5  | -573.4  |
| c2mpyr-br-p3  | -49.9 | -42.9 | -1138.1 | -3688.2  | -876.5 | -3093.0 | -238.6  | -568.3  | -876.5 | -3093.2 | -240.5  | -573.2  |
| c2mpyr-cl-p1  | -44.3 | -39.2 | -1035.3 | -3558.7  | -876.6 | -3093.0 | -138.0  | -442.1  | -876.6 | -3093.1 | -139.1  | -445.9  |
| c2mpyr-cl-p2  | -43.1 | -38.2 | -1034.5 | -3558.2  | -876.3 | -3093.1 | -138.0  | -442.1  | -876.4 | -3093.3 | -139.1  | -445.8  |
| c2mpyr-cl-p3  | -42.9 | -38.0 | -1034.6 | -3558.1  | -876.6 | -3093.1 | -138.0  | -442.1  | -876.6 | -3093.3 | -139.0  | -445.7  |
| c2mpyr-dca-p1 | -44.0 | -40.8 | -1538.9 | -4943.7  | -876.4 | -3092.6 | -641.0  | -1828.7 | -876.4 | -3092.9 | -641.7  | -1830.8 |
| c2mpyr-dca-p2 | -47.5 | -44.1 | -1540.0 | -4945.8  | -876.0 | -3092.3 | -641.0  | -1829.1 | -876.1 | -3092.6 | -641.8  | -1831.3 |
| c2mpyr-dca-p3 | -48.1 | -44.8 | -1540.1 | -4946.3  | -876.1 | -3092.3 | -640.9  | -1829.0 | -876.2 | -3092.6 | -641.7  | -1831.1 |
| c2mpyr-mes-p1 | -44.6 | -37.6 | -1684.2 | -5428.8  | -875.9 | -3092.3 | -786.4  | -2313.9 | -876.0 | -3092.7 | -788.2  | -2318.5 |



|                |       |       |         |          |         |         |         |         |         |         |         |         |
|----------------|-------|-------|---------|----------|---------|---------|---------|---------|---------|---------|---------|---------|
| c2mpyr-mes-p2  | -41.1 | -34.5 | -1683.1 | -5427.7  | -876.6  | -3092.8 | -786.4  | -2314.0 | -876.6  | -3093.1 | -788.1  | -2318.3 |
| c2mpyr-mes-p3  | -39.9 | -33.6 | -1682.0 | -5426.7  | -876.1  | -3092.6 | -786.3  | -2313.9 | -876.1  | -3092.9 | -788.0  | -2318.1 |
| c2mpyr-ntf2-p1 | -51.3 | -45.6 | -3405.6 | -10165.2 | -876.2  | -3091.9 | -2505.5 | -7045.8 | -876.3  | -3092.4 | -2506.9 | -7049.6 |
| c2mpyr-ntf2-p2 | -40.8 | -35.9 | -3400.9 | -10157.7 | -875.9  | -3091.7 | -2505.3 | -7044.9 | -875.9  | -3092.1 | -2506.5 | -7048.2 |
| c2mpyr-ntf2-p3 | -50.2 | -44.6 | -3404.9 | -10164.4 | -876.0  | -3092.0 | -2505.4 | -7045.7 | -876.1  | -3092.4 | -2506.8 | -7049.4 |
| c2mpyr-ntf2-p4 | -49.1 | -43.7 | -3404.3 | -10164.0 | -876.0  | -3092.0 | -2505.4 | -7045.7 | -876.1  | -3092.4 | -2506.8 | -7049.4 |
| c2mpyr-ntf2-p5 | -42.4 | -37.4 | -3401.4 | -10158.4 | -875.7  | -3091.7 | -2505.2 | -7044.7 | -875.8  | -3092.1 | -2506.4 | -7048.0 |
| c2mpyr-ntf2-p6 | -40.0 | -35.3 | -3400.8 | -10157.5 | -876.1  | -3092.0 | -2505.4 | -7044.9 | -876.2  | -3092.4 | -2506.5 | -7048.0 |
| c2mpyr-pf6-p1  | -35.5 | -29.7 | -2158.3 | -6734.8  | -876.1  | -3092.1 | -1265.6 | -3623.9 | -876.2  | -3092.4 | -1267.1 | -3627.7 |
| c2mpyr-pf6-p2  | -33.5 | -28.1 | -2157.4 | -6733.9  | -876.1  | -3092.1 | -1265.6 | -3624.0 | -876.2  | -3092.4 | -1267.1 | -3627.6 |
| c2mpyr-pf6-p3  | -33.1 | -27.7 | -2157.0 | -6733.7  | -876.0  | -3092.0 | -1265.6 | -3624.0 | -876.0  | -3092.3 | -1267.1 | -3627.6 |
| c2mpyr-tos-p1  | -41.8 | -35.4 | -2352.1 | -7379.1  | -875.9  | -3092.2 | -1455.3 | -4265.9 | -876.0  | -3092.6 | -1456.9 | -4270.2 |
| c2mpyr-tos-p2  | -38.4 | -32.4 | -2351.0 | -7377.9  | -876.5  | -3092.7 | -1455.3 | -4266.0 | -876.6  | -3093.1 | -1456.8 | -4269.9 |
| c3mim-bf4-p1   | -38.0 | -31.6 | -1870.8 | -5770.4  | -1025.0 | -3355.3 | -828.2  | -2394.7 | -1025.2 | -3355.9 | -829.8  | -2398.7 |
| c3mim-bf4-p2   | -36.9 | -30.9 | -1870.3 | -5769.9  | -1025.0 | -3355.3 | -828.2  | -2394.7 | -1025.2 | -3355.9 | -829.7  | -2398.5 |
| c3mim-br-p1    | -53.4 | -45.4 | -1289.9 | -3959.4  | -1026.4 | -3362.5 | -238.6  | -568.3  | -1026.5 | -3362.9 | -240.8  | -573.8  |
| c3mim-br-p2    | -38.7 | -31.5 | -1284.5 | -3952.4  | -1027.1 | -3364.1 | -238.6  | -568.3  | -1027.2 | -3364.3 | -240.5  | -573.4  |
| c3mim-br-p3    | -43.1 | -35.6 | -1286.1 | -3954.1  | -1026.7 | -3363.5 | -238.6  | -568.3  | -1026.8 | -3363.7 | -240.6  | -573.6  |
| c3mim-br-p4    | -54.1 | -46.0 | -1290.6 | -3960.4  | -1026.7 | -3363.2 | -238.6  | -568.3  | -1026.8 | -3363.7 | -240.8  | -573.8  |
| c3mim-cl-p1    | -43.5 | -37.7 | -1184.8 | -3827.4  | -1026.3 | -3362.3 | -138.0  | -442.1  | -1026.4 | -3362.7 | -139.3  | -446.2  |
| c3mim-cl-p2    | -33.1 | -28.0 | -1181.8 | -3823.3  | -1027.4 | -3364.6 | -138.0  | -442.1  | -1027.4 | -3364.9 | -139.0  | -445.9  |
| c3mim-cl-p3    | -36.7 | -31.3 | -1183.1 | -3824.5  | -1026.9 | -3363.9 | -138.0  | -442.1  | -1027.0 | -3364.1 | -139.1  | -446.1  |
| c3mim-cl-p4    | -43.1 | -37.4 | -1184.9 | -3827.8  | -1026.5 | -3362.9 | -138.0  | -442.1  | -1026.6 | -3363.3 | -139.2  | -446.1  |
| c3mim-dca-p1   | -66.0 | -61.6 | -1702.5 | -5233.9  | -1024.9 | -3355.5 | -646.7  | -1843.3 | -1025.1 | -3356.2 | -647.6  | -1845.9 |
| c3mim-dca-p2   | -67.2 | -62.9 | -1703.4 | -5235.0  | -1025.3 | -3356.1 | -646.8  | -1843.1 | -1025.4 | -3356.8 | -647.6  | -1845.7 |
| c3mim-dca-p3   | -57.3 | -53.2 | -1699.1 | -5230.1  | -1025.4 | -3356.8 | -646.6  | -1843.1 | -1025.5 | -3357.3 | -647.4  | -1845.8 |
| c3mim-dca-p4   | -68.5 | -64.0 | -1704.2 | -5234.9  | -1025.0 | -3355.7 | -646.8  | -1843.0 | -1025.2 | -3356.4 | -647.7  | -1845.7 |
| c3mim-dca-p5   | -65.0 | -60.8 | -1701.3 | -5232.7  | -1024.5 | -3354.9 | -646.7  | -1843.0 | -1024.6 | -3355.7 | -647.5  | -1845.5 |
| c3mim-dca-p6   | -64.0 | -59.8 | -1701.1 | -5232.3  | -1024.5 | -3355.0 | -646.9  | -1843.0 | -1024.7 | -3355.7 | -647.7  | -1845.5 |
| c3mim-mes-p1   | -55.6 | -47.6 | -1839.2 | -5698.1  | -1025.9 | -3356.7 | -786.4  | -2312.8 | -1026.0 | -3357.4 | -788.4  | -2317.9 |
| c3mim-mes-p2   | -48.3 | -41.0 | -1834.4 | -5693.0  | -1024.7 | -3355.0 | -786.4  | -2312.9 | -1024.9 | -3355.7 | -788.2  | -2317.5 |
| c3mim-ntf2-p1  | -83.1 | -74.8 | -3570.6 | -10446.7 | -1025.1 | -3355.4 | -2507.0 | -7046.8 | -1025.3 | -3356.4 | -2508.9 | -7052.0 |
| c3mim-ntf2-p2  | -55.5 | -48.8 | -3558.4 | -10431.5 | -1025.3 | -3356.7 | -2506.5 | -7045.9 | -1025.4 | -3357.3 | -2508.1 | -7050.4 |
| c3mim-ntf2-p3  | -49.4 | -43.1 | -3556.3 | -10426.4 | -1024.8 | -3355.7 | -2507.0 | -7045.7 | -1024.9 | -3356.4 | -2508.4 | -7049.8 |
| c3mim-ntf2-p4  | -71.3 | -64.2 | -3564.8 | -10440.0 | -1024.6 | -3354.7 | -2507.2 | -7047.0 | -1024.8 | -3355.5 | -2508.8 | -7051.5 |
| c3mim-pf6-p1   | -42.3 | -35.8 | -2309.5 | -7001.2  | -1024.7 | -3354.9 | -1265.4 | -3623.4 | -1024.9 | -3355.5 | -1267.1 | -3627.4 |
| c3mim-pf6-p2   | -37.9 | -31.8 | -2307.1 | -6998.5  | -1024.3 | -3354.3 | -1265.5 | -3623.6 | -1024.4 | -3354.9 | -1267.0 | -3627.4 |
| c3mim-tos-p1   | -54.9 | -47.4 | -2508.3 | -7649.9  | -1025.7 | -3356.5 | -1455.9 | -4265.3 | -1025.8 | -3357.2 | -1457.7 | -4270.1 |
| c3mim-tos-p2   | -51.7 | -44.6 | -2506.5 | -7647.9  | -1025.4 | -3355.9 | -1455.9 | -4265.4 | -1025.5 | -3356.7 | -1457.6 | -4269.9 |



|                |       |       |         |          |         |         |         |         |         |         |         |         |
|----------------|-------|-------|---------|----------|---------|---------|---------|---------|---------|---------|---------|---------|
| c3mpyr-bf4-p1  | -35.9 | -30.0 | -1827.6 | -5883.7  | -982.9  | -3471.3 | -827.9  | -2393.3 | -983.0  | -3471.7 | -829.4  | -2397.2 |
| c3mpyr-bf4-p2  | -33.4 | -28.0 | -1826.8 | -5882.6  | -983.3  | -3471.6 | -827.9  | -2393.3 | -983.3  | -3471.9 | -829.3  | -2397.0 |
| c3mpyr-bf4-p3  | -33.3 | -27.9 | -1826.4 | -5882.5  | -983.0  | -3471.5 | -827.9  | -2393.3 | -983.0  | -3471.8 | -829.2  | -2396.9 |
| c3mpyr-br-p1   | -53.3 | -45.7 | -1246.9 | -4069.2  | -983.6  | -3472.3 | -238.6  | -568.3  | -983.6  | -3472.5 | -240.6  | -573.6  |
| c3mpyr-br-p2   | -50.2 | -43.0 | -1245.3 | -4067.6  | -983.4  | -3472.3 | -238.6  | -568.3  | -983.5  | -3472.5 | -240.5  | -573.4  |
| c3mpyr-br-p3   | -50.7 | -43.6 | -1245.5 | -4068.0  | -983.5  | -3472.4 | -238.6  | -568.3  | -983.5  | -3472.6 | -240.5  | -573.3  |
| c3mpyr-cl-p1   | -44.8 | -39.5 | -1142.5 | -3938.3  | -983.6  | -3472.3 | -138.0  | -442.1  | -983.7  | -3472.5 | -139.1  | -446.0  |
| c3mpyr-cl-p2   | -43.3 | -38.3 | -1141.6 | -3937.6  | -983.3  | -3472.4 | -138.0  | -442.1  | -983.4  | -3472.6 | -139.1  | -445.8  |
| c3mpyr-cl-p3   | -43.2 | -38.3 | -1141.7 | -3937.7  | -983.6  | -3472.5 | -138.0  | -442.1  | -983.6  | -3472.6 | -139.1  | -445.8  |
| c3mpyr-dca-p1  | -45.2 | -41.8 | -1646.3 | -5323.7  | -983.2  | -3471.7 | -641.0  | -1828.9 | -983.2  | -3472.0 | -641.8  | -1831.1 |
| c3mpyr-dca-p2  | -47.5 | -44.0 | -1647.0 | -5325.2  | -983.0  | -3471.6 | -641.0  | -1829.1 | -983.1  | -3472.0 | -641.8  | -1831.3 |
| c3mpyr-dca-p3  | -43.2 | -40.0 | -1643.7 | -5325.1  | -983.1  | -3471.6 | -641.0  | -1829.8 | -983.2  | -3472.0 | -641.7  | -1831.9 |
| c3mpyr-dca-p4  | -46.1 | -42.8 | -1646.3 | -5324.7  | -983.3  | -3471.8 | -640.9  | -1828.9 | -983.4  | -3472.1 | -641.6  | -1831.1 |
| c3mpyr-dca-p5  | -48.1 | -44.7 | -1647.1 | -5325.6  | -983.1  | -3471.6 | -640.9  | -1829.0 | -983.2  | -3472.0 | -641.7  | -1831.2 |
| c3mpyr-mes-p1  | -45.4 | -38.3 | -1791.5 | -5808.7  | -982.9  | -3471.6 | -786.3  | -2313.9 | -983.0  | -3472.0 | -788.2  | -2318.7 |
| c3mpyr-mes-p2  | -41.3 | -34.7 | -1790.2 | -5807.1  | -983.6  | -3472.0 | -786.4  | -2314.0 | -983.6  | -3472.4 | -788.1  | -2318.4 |
| c3mpyr-mes-p3  | -40.8 | -34.3 | -1789.5 | -5806.6  | -983.1  | -3471.9 | -786.3  | -2313.9 | -983.1  | -3472.3 | -788.0  | -2318.2 |
| c3mpyr-ntf2-p1 | -53.4 | -47.4 | -3513.6 | -10545.8 | -983.3  | -3471.5 | -2505.5 | -7045.8 | -983.4  | -3472.0 | -2506.9 | -7049.7 |
| c3mpyr-ntf2-p2 | -40.7 | -35.8 | -3508.1 | -10536.9 | -982.9  | -3471.2 | -2505.3 | -7044.8 | -983.0  | -3471.6 | -2506.5 | -7048.1 |
| c3mpyr-ntf2-p3 | -50.4 | -44.8 | -3512.0 | -10543.9 | -982.9  | -3471.2 | -2505.5 | -7045.7 | -983.0  | -3471.7 | -2506.9 | -7049.5 |
| c3mpyr-ntf2-p4 | -51.3 | -45.6 | -3512.3 | -10544.4 | -983.0  | -3471.4 | -2505.4 | -7045.6 | -983.1  | -3471.8 | -2506.8 | -7049.4 |
| c3mpyr-ntf2-p5 | -42.3 | -37.3 | -3508.3 | -10537.6 | -982.7  | -3471.0 | -2505.2 | -7044.7 | -982.8  | -3471.5 | -2506.4 | -7048.0 |
| c3mpyr-ntf2-p6 | -41.7 | -36.7 | -3508.6 | -10537.7 | -983.1  | -3471.4 | -2505.3 | -7044.8 | -983.2  | -3471.8 | -2506.5 | -7048.1 |
| c3mpyr-pf6-p1  | -36.7 | -30.6 | -2265.5 | -7114.7  | -982.8  | -3471.2 | -1265.6 | -3623.9 | -982.9  | -3471.5 | -1267.2 | -3627.9 |
| c3mpyr-pf6-p2  | -33.5 | -27.9 | -2264.3 | -7113.1  | -983.1  | -3471.3 | -1265.6 | -3624.0 | -983.2  | -3471.7 | -1267.1 | -3627.6 |
| c3mpyr-pf6-p3  | -33.7 | -28.1 | -2264.1 | -7113.3  | -982.9  | -3471.3 | -1265.6 | -3624.0 | -983.0  | -3471.6 | -1267.1 | -3627.7 |
| c3mpyr-tos-p1  | -42.8 | -36.2 | -2459.4 | -7759.0  | -982.9  | -3471.6 | -1455.3 | -4265.9 | -983.0  | -3472.0 | -1456.9 | -4270.3 |
| c3mpyr-tos-p2  | -38.7 | -32.6 | -2458.0 | -7757.4  | -983.5  | -3472.0 | -1455.3 | -4265.9 | -983.6  | -3472.4 | -1456.8 | -4270.0 |
| c4mim-bf4-p1   | -38.5 | -32.1 | -1978.1 | -6149.5  | -1132.0 | -3734.2 | -828.2  | -2394.7 | -1132.2 | -3734.8 | -829.8  | -2398.8 |
| c4mim-bf4-p2   | -37.1 | -31.0 | -1977.3 | -6148.7  | -1132.0 | -3734.0 | -828.2  | -2394.7 | -1132.1 | -3734.6 | -829.7  | -2398.6 |
| c4mim-br-p1    | -54.4 | -46.2 | -1397.3 | -4339.3  | -1133.4 | -3741.9 | -238.6  | -568.3  | -1133.5 | -3742.2 | -240.8  | -573.9  |
| c4mim-br-p2    | -39.8 | -32.3 | -1391.9 | -4332.4  | -1134.1 | -3743.4 | -238.6  | -568.3  | -1134.2 | -3743.7 | -240.6  | -573.5  |
| c4mim-br-p3    | -45.1 | -37.3 | -1394.1 | -4334.5  | -1133.7 | -3742.8 | -238.6  | -568.3  | -1133.8 | -3743.1 | -240.7  | -573.8  |
| c4mim-br-p4    | -54.7 | -46.5 | -1397.8 | -4339.8  | -1133.6 | -3742.4 | -238.6  | -568.3  | -1133.7 | -3742.8 | -240.8  | -573.9  |
| c4mim-cl-p1    | -44.1 | -38.2 | -1292.0 | -4207.1  | -1133.2 | -3741.6 | -138.0  | -442.1  | -1133.3 | -3742.0 | -139.3  | -446.3  |
| c4mim-cl-p2    | -33.6 | -28.5 | -1289.1 | -4203.0  | -1134.3 | -3743.9 | -138.0  | -442.1  | -1134.4 | -3744.2 | -139.0  | -446.0  |
| c4mim-cl-p3    | -38.0 | -32.5 | -1290.7 | -4204.6  | -1133.9 | -3743.2 | -138.0  | -442.1  | -1133.9 | -3743.4 | -139.2  | -446.2  |
| c4mim-cl-p4    | -43.6 | -37.8 | -1291.9 | -4207.2  | -1133.4 | -3742.0 | -138.0  | -442.1  | -1133.5 | -3742.4 | -139.3  | -446.2  |
| c4mim-dca-p1   | -66.7 | -62.3 | -1809.8 | -5613.1  | -1131.9 | -3734.3 | -646.7  | -1843.3 | -1132.1 | -3735.0 | -647.6  | -1846.0 |



|                |       |       |         |          |         |         |         |         |         |         |         |         |
|----------------|-------|-------|---------|----------|---------|---------|---------|---------|---------|---------|---------|---------|
| c4mim-dca-p2   | -70.1 | -65.5 | -1811.9 | -5614.6  | -1132.1 | -3734.6 | -646.8  | -1843.0 | -1132.2 | -3735.3 | -647.7  | -1845.9 |
| c4mim-dca-p3   | -65.2 | -61.0 | -1808.3 | -5611.6  | -1131.4 | -3733.6 | -646.7  | -1843.0 | -1131.6 | -3734.4 | -647.5  | -1845.5 |
| c4mim-mes-p1   | -56.8 | -48.6 | -1946.8 | -6077.6  | -1132.9 | -3735.5 | -786.4  | -2312.8 | -1133.0 | -3736.2 | -788.4  | -2318.1 |
| c4mim-mes-p2   | -48.4 | -41.1 | -1941.2 | -6071.7  | -1131.6 | -3733.6 | -786.4  | -2312.9 | -1131.7 | -3734.3 | -788.3  | -2317.6 |
| c4mim-pf6-p1   | -44.5 | -37.3 | -2418.0 | -7381.6  | -1131.9 | -3734.2 | -1265.5 | -3623.5 | -1132.1 | -3734.8 | -1267.3 | -3628.2 |
| c4mim-pf6-p2   | -37.9 | -31.8 | -2413.9 | -7377.2  | -1131.2 | -3733.0 | -1265.5 | -3623.6 | -1131.3 | -3733.5 | -1267.0 | -3627.4 |
| c4mim-tos-p1   | -57.1 | -49.4 | -2616.4 | -8030.0  | -1132.7 | -3735.4 | -1455.9 | -4265.3 | -1132.9 | -3736.1 | -1457.8 | -4270.3 |
| c4mim-tos-p2   | -52.9 | -45.8 | -2614.4 | -8027.6  | -1132.7 | -3735.2 | -1455.9 | -4265.3 | -1132.8 | -3735.9 | -1457.6 | -4269.9 |
| c4mpyr-bf4-p1  | -36.0 | -30.0 | -1934.4 | -6262.7  | -1089.7 | -3850.3 | -827.9  | -2393.3 | -1089.8 | -3850.7 | -829.4  | -2397.2 |
| c4mpyr-bf4-p2  | -33.5 | -28.0 | -1933.6 | -6261.7  | -1090.1 | -3850.6 | -827.9  | -2393.3 | -1090.1 | -3850.9 | -829.3  | -2397.0 |
| c4mpyr-bf4-p3  | -33.5 | -28.1 | -1933.3 | -6261.7  | -1089.8 | -3850.5 | -827.9  | -2393.3 | -1089.9 | -3850.8 | -829.3  | -2397.0 |
| c4mpyr-br-p1   | -53.5 | -45.9 | -1353.8 | -4448.3  | -1090.4 | -3851.3 | -238.6  | -568.3  | -1090.5 | -3851.5 | -240.7  | -573.7  |
| c4mpyr-br-p2   | -50.6 | -43.3 | -1352.2 | -4446.9  | -1090.3 | -3851.3 | -238.6  | -568.3  | -1090.3 | -3851.5 | -240.6  | -573.4  |
| c4mpyr-br-p3   | -51.0 | -43.8 | -1352.5 | -4447.2  | -1090.3 | -3851.3 | -238.6  | -568.3  | -1090.4 | -3851.6 | -240.5  | -573.4  |
| c4mpyr-cl-p1   | -44.8 | -39.5 | -1249.3 | -4317.3  | -1090.4 | -3851.3 | -138.0  | -442.1  | -1090.5 | -3851.5 | -139.2  | -446.0  |
| c4mpyr-cl-p2   | -43.9 | -38.7 | -1248.7 | -4317.0  | -1090.2 | -3851.5 | -138.0  | -442.1  | -1090.2 | -3851.7 | -139.1  | -445.9  |
| c4mpyr-cl-p3   | -43.2 | -38.2 | -1248.5 | -4316.6  | -1090.4 | -3851.4 | -138.0  | -442.1  | -1090.4 | -3851.6 | -139.1  | -445.8  |
| c4mpyr-dca-p1  | -45.2 | -42.0 | -1752.2 | -5703.4  | -1089.9 | -3850.4 | -640.9  | -1829.1 | -1090.0 | -3850.8 | -641.7  | -1831.2 |
| c4mpyr-dca-p2  | -47.5 | -44.0 | -1753.8 | -5704.2  | -1089.9 | -3850.6 | -641.0  | -1829.1 | -1090.0 | -3851.0 | -641.8  | -1831.3 |
| c4mpyr-dca-p3  | -46.0 | -42.5 | -1753.4 | -5703.1  | -1089.9 | -3850.6 | -641.0  | -1828.9 | -1090.0 | -3850.9 | -641.8  | -1831.2 |
| c4mpyr-dca-p4  | -46.9 | -43.5 | -1753.2 | -5704.2  | -1089.9 | -3850.6 | -641.0  | -1829.0 | -1090.0 | -3851.0 | -641.7  | -1831.2 |
| c4mpyr-dca-p5  | -48.2 | -44.8 | -1753.9 | -5704.7  | -1089.9 | -3850.6 | -641.0  | -1829.0 | -1090.0 | -3850.9 | -641.7  | -1831.2 |
| c4mpyr-mes-p1  | -45.4 | -38.2 | -1898.3 | -6187.7  | -1089.8 | -3850.6 | -786.3  | -2313.9 | -1089.8 | -3851.0 | -788.2  | -2318.7 |
| c4mpyr-mes-p2  | -41.8 | -35.1 | -1897.2 | -6186.4  | -1090.4 | -3851.1 | -786.4  | -2314.0 | -1090.5 | -3851.4 | -788.2  | -2318.5 |
| c4mpyr-mes-p3  | -41.0 | -34.5 | -1896.4 | -6185.7  | -1089.9 | -3850.9 | -786.4  | -2313.9 | -1090.0 | -3851.3 | -788.0  | -2318.3 |
| c4mpyr-ntf2-p1 | -53.5 | -47.5 | -3620.4 | -10924.8 | -1090.1 | -3850.4 | -2505.5 | -7045.7 | -1090.2 | -3850.9 | -2506.9 | -7049.7 |
| c4mpyr-ntf2-p2 | -45.6 | -40.1 | -3616.9 | -10918.2 | -1089.8 | -3850.1 | -2505.2 | -7044.5 | -1089.8 | -3850.6 | -2506.5 | -7048.1 |
| c4mpyr-ntf2-p3 | -51.6 | -45.9 | -3619.4 | -10923.6 | -1089.8 | -3850.4 | -2505.5 | -7045.7 | -1089.9 | -3850.8 | -2506.9 | -7049.6 |
| c4mpyr-ntf2-p4 | -52.3 | -46.5 | -3619.7 | -10924.0 | -1089.9 | -3850.4 | -2505.4 | -7045.7 | -1090.0 | -3850.8 | -2506.9 | -7049.6 |
| c4mpyr-ntf2-p5 | -43.0 | -37.9 | -3615.4 | -10917.0 | -1089.5 | -3850.1 | -2505.2 | -7044.7 | -1089.6 | -3850.5 | -2506.4 | -7048.0 |
| c4mpyr-ntf2-p6 | -43.2 | -38.1 | -3616.1 | -10917.5 | -1090.0 | -3850.4 | -2505.3 | -7044.7 | -1090.0 | -3850.8 | -2506.5 | -7048.2 |
| c4mpyr-pf6-p1  | -36.8 | -30.7 | -2372.4 | -7493.7  | -1089.7 | -3850.2 | -1265.6 | -3623.9 | -1089.7 | -3850.5 | -1267.2 | -3628.0 |
| c4mpyr-pf6-p2  | -33.9 | -28.3 | -2371.4 | -7492.5  | -1090.0 | -3850.4 | -1265.6 | -3624.0 | -1090.0 | -3850.7 | -1267.1 | -3627.7 |
| c4mpyr-pf6-p3  | -33.9 | -28.3 | -2371.1 | -7492.5  | -1089.8 | -3850.3 | -1265.6 | -3624.0 | -1089.8 | -3850.6 | -1267.1 | -3627.7 |
| c4mpyr-tos-p1  | -43.0 | -36.4 | -2566.5 | -8138.2  | -1089.8 | -3850.6 | -1455.3 | -4265.9 | -1089.9 | -3851.1 | -1457.0 | -4270.4 |
| c4mpyr-tos-p2  | -39.3 | -33.2 | -2565.2 | -8136.9  | -1090.4 | -3851.0 | -1455.4 | -4266.0 | -1090.5 | -3851.4 | -1456.9 | -4270.1 |



### 2.2.13 ACCQ basis set

Table S 14: Raw ACCQ energies. Superscript \* indicates monomer calculated in the dimer basis set.

| ion pair       | E(int) | E(int) CP | E(dimer) SS | E(dimer) OS | E(A) SS | E(A) OS | E(B) SS | E(B) OS | E(A) SS* | E(A) OS* | E(B) SS* | E(B) OS* |
|----------------|--------|-----------|-------------|-------------|---------|---------|---------|---------|----------|----------|----------|----------|
| clmim-bf4-p1   | -34.6  | -31.3     | -1662.2     | -5064.5     | -812.0  | -2615.8 | -834.5  | -2429.9 | -812.1   | -2616.7  | -834.6   | -2432.0  |
| clmim-br-p1    | -57.4  | -45.1     | -1082.7     | -3235.5     | -813.9  | -2623.3 | -242.7  | -580.9  | -814.0   | -2623.8  | -246.1   | -589.2   |
| clmim-br-p2    | -40.5  | -28.0     | -1074.8     | -3226.2     | -813.7  | -2623.3 | -242.7  | -580.9  | -813.7   | -2623.6  | -246.0   | -589.6   |
| clmim-cl-p1    | -39.9  | -36.8     | -973.4      | -3096.7     | -813.8  | -2623.0 | -140.6  | -452.7  | -813.8   | -2623.5  | -140.8   | -455.2   |
| clmim-cl-p2    | -28.8  | -25.1     | -968.9      | -3091.1     | -813.9  | -2623.9 | -140.6  | -452.7  | -813.9   | -2624.2  | -140.8   | -456.0   |
| clmim-dca-p1   | -64.9  | -61.5     | -1492.6     | -4514.7     | -812.4  | -2617.0 | -650.2  | -1862.9 | -812.5   | -2618.0  | -650.3   | -1865.1  |
| clmim-dca-p2   | -47.8  | -44.5     | -1484.8     | -4506.3     | -812.5  | -2618.1 | -649.8  | -1862.9 | -812.6   | -2618.7  | -650.0   | -1865.2  |
| clmim-mes-p1   | -46.4  | -42.2     | -1628.1     | -4986.8     | -812.5  | -2616.7 | -793.3  | -2346.0 | -812.6   | -2617.7  | -793.6   | -2348.8  |
| clmim-ntf2-p1  | -75.0  | -68.4     | -3370.1     | -9799.7     | -812.0  | -2615.9 | -2524.3 | -7142.5 | -812.2   | -2617.5  | -2524.8  | -7146.9  |
| clmim-ntf2-p2  | -41.0  | -35.5     | -3354.9     | -9780.2     | -812.3  | -2617.6 | -2523.5 | -7140.8 | -812.4   | -2618.6  | -2523.9  | -7144.7  |
| clmim-ntf2-p3  | -45.6  | -40.2     | -3358.1     | -9782.2     | -812.0  | -2616.7 | -2524.3 | -7141.6 | -812.2   | -2617.9  | -2524.7  | -7145.4  |
| clmim-pf6-p1   | -37.7  | -33.6     | -2105.3     | -6316.1     | -812.0  | -2615.9 | -1276.4 | -3679.6 | -812.1   | -2616.8  | -1276.6  | -3682.3  |
| clmim-tos-p1   | -44.5  | -40.2     | -2297.9     | -6952.7     | -812.2  | -2616.4 | -1464.5 | -4313.2 | -812.3   | -2617.5  | -1464.7  | -4315.9  |
| clmpyr-bf4-p1  | -34.2  | -30.4     | -1618.3     | -5175.9     | -768.4  | -2729.1 | -834.1  | -2428.4 | -768.5   | -2729.7  | -834.3   | -2431.1  |
| clmpyr-bf4-p2  | -31.5  | -28.0     | -1617.1     | -5174.7     | -768.6  | -2729.3 | -834.1  | -2428.4 | -768.6   | -2729.8  | -834.3   | -2431.0  |
| clmpyr-br-p1   | -58.9  | -45.0     | -1037.9     | -3343.8     | -769.1  | -2730.1 | -242.7  | -580.9  | -769.2   | -2730.4  | -246.5   | -590.6   |
| clmpyr-br-p2   | -55.9  | -42.8     | -1036.5     | -3342.4     | -769.1  | -2730.3 | -242.7  | -580.9  | -769.2   | -2730.6  | -246.3   | -590.0   |
| clmpyr-cl-p1   | -42.5  | -38.8     | -929.5      | -3205.8     | -769.2  | -2730.2 | -140.6  | -452.7  | -769.2   | -2730.5  | -140.8   | -456.0   |
| clmpyr-cl-p2   | -41.3  | -37.7     | -928.9      | -3205.3     | -769.2  | -2730.4 | -140.6  | -452.7  | -769.2   | -2730.6  | -140.8   | -455.9   |
| clmpyr-dca-p1  | -44.6  | -41.7     | -1434.6     | -4601.7     | -769.0  | -2729.8 | -644.3  | -1848.6 | -769.1   | -2730.4  | -644.4   | -1850.7  |
| clmpyr-dca-p2  | -48.7  | -45.7     | -1435.8     | -4604.4     | -768.8  | -2729.5 | -644.2  | -1848.9 | -768.9   | -2730.1  | -644.4   | -1851.1  |
| clmpyr-dca-p3  | -45.2  | -42.0     | -1432.7     | -4603.9     | -768.5  | -2729.3 | -644.1  | -1849.4 | -768.6   | -2729.9  | -644.3   | -1851.7  |
| clmpyr-dca-p4  | -47.1  | -44.1     | -1434.8     | -4603.3     | -768.5  | -2729.3 | -644.2  | -1848.9 | -768.6   | -2729.9  | -644.4   | -1851.1  |
| clmpyr-mes-p1  | -41.9  | -37.4     | -1582.1     | -5098.1     | -768.4  | -2729.4 | -793.3  | -2347.1 | -768.5   | -2730.1  | -793.7   | -2350.5  |
| clmpyr-mes-p2  | -36.9  | -32.8     | -1579.9     | -5095.8     | -768.7  | -2729.7 | -793.3  | -2347.1 | -768.7   | -2730.4  | -793.6   | -2350.2  |
| clmpyr-ntf2-p1 | -51.0  | -45.2     | -3314.1     | -9899.0     | -768.8  | -2729.2 | -2522.7 | -7141.5 | -768.9   | -2730.1  | -2523.2  | -7145.8  |
| clmpyr-ntf2-p2 | -39.9  | -34.7     | -3309.5     | -9891.0     | -768.5  | -2728.9 | -2522.6 | -7140.5 | -768.6   | -2729.8  | -2523.0  | -7144.4  |
| clmpyr-ntf2-p3 | -49.5  | -43.8     | -3313.4     | -9898.0     | -768.8  | -2729.3 | -2522.6 | -7141.2 | -768.8   | -2730.2  | -2523.1  | -7145.5  |
| clmpyr-ntf2-p5 | -41.2  | -36.0     | -3310.2     | -9891.7     | -768.7  | -2729.2 | -2522.5 | -7140.3 | -768.8   | -2730.0  | -2522.9  | -7144.1  |
| clmpyr-pf6-p1  | -34.9  | -30.5     | -2060.7     | -6428.1     | -768.4  | -2729.0 | -1276.5 | -3679.9 | -768.5   | -2729.7  | -1276.8  | -3683.3  |
| clmpyr-pf6-p2  | -32.2  | -28.2     | -2059.5     | -6427.0     | -768.6  | -2729.2 | -1276.5 | -3680.0 | -768.6   | -2729.7  | -1276.8  | -3683.2  |
| clmpyr-tos-p1  | -39.9  | -35.3     | -2252.0     | -7063.7     | -768.5  | -2729.4 | -1464.0 | -4313.9 | -768.5   | -2730.2  | -1464.4  | -4317.3  |
| clmpyr-tos-p2  | -34.8  | -30.6     | -2249.3     | -7061.4     | -768.6  | -2729.5 | -1464.0 | -4313.9 | -768.6   | -2730.2  | -1464.3  | -4317.0  |



|               |       |       |         |          |        |         |         |         |        |         |         |         |
|---------------|-------|-------|---------|----------|--------|---------|---------|---------|--------|---------|---------|---------|
| c2mim-bf4-p1  | -36.8 | -33.1 | -1772.2 | -5448.5  | -920.9 | -2998.7 | -834.5  | -2429.8 | -921.0 | -2999.6 | -834.7  | -2432.4 |
| c2mim-bf4-p2  | -34.2 | -30.7 | -1770.5 | -5446.6  | -920.5 | -2998.0 | -834.5  | -2429.9 | -920.6 | -2998.9 | -834.7  | -2432.2 |
| c2mim-br-p1   | -60.2 | -46.5 | -1192.1 | -3619.6  | -922.4 | -3005.6 | -242.7  | -580.9  | -922.4 | -3006.0 | -246.5  | -590.2  |
| c2mim-br-p2   | -45.6 | -31.7 | -1186.7 | -3613.4  | -923.3 | -3007.6 | -242.7  | -580.9  | -923.4 | -3007.9 | -246.5  | -590.7  |
| c2mim-br-p3   | -45.8 | -32.3 | -1186.1 | -3612.4  | -922.5 | -3006.6 | -242.7  | -580.9  | -922.6 | -3006.8 | -246.4  | -590.4  |
| c2mim-br-p4   | -59.4 | -46.4 | -1192.6 | -3620.2  | -923.1 | -3006.8 | -242.7  | -580.9  | -923.1 | -3007.2 | -246.3  | -589.7  |
| c2mim-cl-p1   | -42.0 | -38.5 | -1082.7 | -3480.4  | -922.3 | -3005.5 | -140.6  | -452.7  | -922.3 | -3005.9 | -140.8  | -455.5  |
| c2mim-cl-p2   | -31.5 | -27.5 | -1079.8 | -3476.8  | -923.6 | -3008.1 | -140.6  | -452.7  | -923.6 | -3008.4 | -140.9  | -456.2  |
| c2mim-cl-p3   | -32.2 | -28.3 | -1079.3 | -3476.1  | -922.8 | -3007.1 | -140.6  | -452.7  | -922.8 | -3007.4 | -140.8  | -456.0  |
| c2mim-cl-p4   | -41.0 | -37.7 | -1082.9 | -3480.7  | -922.8 | -3006.4 | -140.6  | -452.7  | -922.8 | -3006.8 | -140.8  | -455.3  |
| c2mim-dca-p1  | -66.5 | -62.7 | -1601.5 | -4898.2  | -920.9 | -2999.0 | -650.0  | -1863.2 | -921.0 | -3000.0 | -650.3  | -1865.7 |
| c2mim-dca-p2  | -62.5 | -58.9 | -1600.1 | -4895.7  | -921.0 | -2999.1 | -650.1  | -1863.1 | -921.1 | -3000.0 | -650.3  | -1865.4 |
| c2mim-dca-p3  | -66.8 | -63.0 | -1602.7 | -4898.8  | -921.6 | -2999.8 | -650.2  | -1863.0 | -921.7 | -3000.8 | -650.4  | -1865.5 |
| c2mim-dca-p4  | -63.6 | -60.0 | -1600.4 | -4896.3  | -920.9 | -2999.0 | -650.1  | -1863.0 | -921.0 | -3000.0 | -650.3  | -1865.3 |
| c2mim-dca-p5  | -65.1 | -61.5 | -1601.1 | -4897.1  | -920.9 | -2999.1 | -650.2  | -1862.9 | -921.0 | -3000.1 | -650.4  | -1865.2 |
| c2mim-dca-p6  | -65.3 | -61.8 | -1600.9 | -4897.2  | -920.8 | -2998.8 | -650.2  | -1863.0 | -920.9 | -2999.7 | -650.4  | -1865.3 |
| c2mim-mes-p1  | -52.1 | -47.4 | -1739.9 | -5373.0  | -921.7 | -2999.9 | -793.3  | -2345.9 | -921.8 | -3001.0 | -793.6  | -2349.1 |
| c2mim-mes-p2  | -47.0 | -42.6 | -1736.6 | -5369.3  | -920.8 | -2998.7 | -793.3  | -2346.1 | -921.0 | -2999.7 | -793.6  | -2349.0 |
| c2mim-ntf2-p1 | -81.8 | -74.3 | -3482.1 | -10186.4 | -921.0 | -2998.8 | -2524.3 | -7142.5 | -921.2 | -3000.5 | -2524.9 | -7147.7 |
| c2mim-ntf2-p2 | -52.1 | -45.6 | -3469.0 | -10170.2 | -921.2 | -3000.3 | -2523.8 | -7141.7 | -921.3 | -3001.5 | -2524.3 | -7146.4 |
| c2mim-ntf2-p3 | -49.2 | -43.1 | -3468.5 | -10166.6 | -920.8 | -2999.2 | -2524.3 | -7141.6 | -920.9 | -3000.5 | -2524.8 | -7145.9 |
| c2mim-ntf2-p4 | -71.7 | -65.0 | -3478.0 | -10180.9 | -920.9 | -2998.7 | -2524.7 | -7142.9 | -921.1 | -3000.3 | -2525.1 | -7147.4 |
| c2mim-pf6-p1  | -41.8 | -37.2 | -2216.0 | -6701.1  | -920.8 | -2998.6 | -1276.4 | -3679.5 | -920.9 | -2999.6 | -1276.7 | -3682.8 |
| c2mim-pf6-p2  | -37.9 | -33.7 | -2213.7 | -6698.5  | -920.4 | -2997.9 | -1276.4 | -3679.6 | -920.5 | -2998.9 | -1276.7 | -3682.4 |
| c2mim-tos-p1  | -52.0 | -47.1 | -2410.8 | -7339.8  | -921.5 | -2999.7 | -1464.4 | -4313.0 | -921.7 | -3000.8 | -1464.7 | -4316.3 |
| c2mim-tos-p2  | -45.8 | -41.2 | -2407.2 | -7335.7  | -920.8 | -2998.7 | -1464.4 | -4313.1 | -921.0 | -2999.9 | -1464.7 | -4316.1 |
| c2mpyr-bf4-p1 | -34.7 | -30.9 | -1729.1 | -5561.7  | -879.1 | -3114.6 | -834.1  | -2428.3 | -879.1 | -3115.3 | -834.3  | -2431.2 |
| c2mpyr-bf4-p2 | -32.6 | -29.0 | -1728.6 | -5561.1  | -879.6 | -3115.1 | -834.1  | -2428.4 | -879.6 | -3115.7 | -834.3  | -2431.1 |
| c2mpyr-bf4-p3 | -32.2 | -28.6 | -1728.0 | -5560.7  | -879.2 | -3114.8 | -834.1  | -2428.4 | -879.2 | -3115.4 | -834.3  | -2431.1 |
| c2mpyr-br-p1  | -60.5 | -45.8 | -1149.1 | -3730.3  | -879.7 | -3115.6 | -242.7  | -580.9  | -879.8 | -3115.9 | -246.8  | -591.2  |
| c2mpyr-br-p2  | -58.6 | -44.2 | -1148.2 | -3729.7  | -879.7 | -3116.1 | -242.7  | -580.9  | -879.7 | -3116.3 | -246.7  | -591.0  |
| c2mpyr-br-p3  | -57.4 | -43.6 | -1147.6 | -3728.7  | -879.6 | -3115.7 | -242.7  | -580.9  | -879.7 | -3115.9 | -246.5  | -590.6  |
| c2mpyr-cl-p1  | -43.1 | -39.2 | -1040.3 | -3591.6  | -879.8 | -3115.6 | -140.6  | -452.7  | -879.8 | -3115.9 | -140.9  | -456.1  |
| c2mpyr-cl-p2  | -42.0 | -38.2 | -1039.6 | -3591.2  | -879.5 | -3115.8 | -140.6  | -452.7  | -879.5 | -3116.1 | -140.9  | -456.0  |
| c2mpyr-cl-p3  | -41.6 | -37.9 | -1039.6 | -3591.0  | -879.8 | -3115.8 | -140.6  | -452.7  | -879.8 | -3116.1 | -140.8  | -456.0  |
| c2mpyr-dca-p1 | -44.8 | -41.8 | -1545.2 | -4987.3  | -879.6 | -3115.2 | -644.3  | -1848.6 | -879.6 | -3115.8 | -644.4  | -1850.8 |
| c2mpyr-dca-p2 | -48.4 | -45.3 | -1546.4 | -4989.5  | -879.2 | -3115.0 | -644.3  | -1849.0 | -879.3 | -3115.6 | -644.5  | -1851.3 |
| c2mpyr-dca-p3 | -49.1 | -46.0 | -1546.4 | -4990.0  | -879.3 | -3114.9 | -644.2  | -1848.9 | -879.3 | -3115.5 | -644.4  | -1851.2 |
| c2mpyr-mes-p1 | -43.2 | -38.5 | -1693.2 | -5484.5  | -879.1 | -3114.9 | -793.3  | -2347.1 | -879.1 | -3115.7 | -793.7  | -2350.6 |



|                |       |       |         |          |         |         |         |         |         |         |         |         |
|----------------|-------|-------|---------|----------|---------|---------|---------|---------|---------|---------|---------|---------|
| c2mpyr-mes-p2  | -39.8 | -35.4 | -1692.2 | -5483.4  | -879.8  | -3115.5 | -793.3  | -2347.2 | -879.8  | -3116.1 | -793.7  | -2350.6 |
| c2mpyr-mes-p3  | -38.5 | -34.1 | -1691.1 | -5482.3  | -879.3  | -3115.3 | -793.3  | -2347.1 | -879.3  | -3115.9 | -793.6  | -2350.4 |
| c2mpyr-ntf2-p1 | -52.4 | -46.4 | -3425.6 | -10285.3 | -879.4  | -3114.6 | -2522.9 | -7141.6 | -879.5  | -3115.5 | -2523.3 | -7146.1 |
| c2mpyr-ntf2-p2 | -42.3 | -36.7 | -3421.1 | -10278.0 | -879.0  | -3114.4 | -2522.6 | -7140.7 | -879.1  | -3115.3 | -2523.1 | -7144.9 |
| c2mpyr-ntf2-p3 | -51.3 | -45.3 | -3424.9 | -10284.5 | -879.2  | -3114.7 | -2522.8 | -7141.5 | -879.3  | -3115.5 | -2523.2 | -7146.0 |
| c2mpyr-ntf2-p4 | -50.2 | -44.3 | -3424.2 | -10284.1 | -879.2  | -3114.6 | -2522.8 | -7141.5 | -879.3  | -3115.5 | -2523.3 | -7146.0 |
| c2mpyr-ntf2-p5 | -43.9 | -38.4 | -3421.6 | -10278.6 | -878.9  | -3114.4 | -2522.5 | -7140.5 | -879.0  | -3115.2 | -2523.0 | -7144.6 |
| c2mpyr-ntf2-p6 | -41.5 | -36.2 | -3421.0 | -10277.7 | -879.3  | -3114.7 | -2522.7 | -7140.6 | -879.4  | -3115.5 | -2523.1 | -7144.6 |
| c2mpyr-pf6-p1  | -35.2 | -30.7 | -2171.7 | -6814.0  | -879.3  | -3114.7 | -1276.5 | -3679.9 | -879.3  | -3115.4 | -1276.8 | -3683.3 |
| c2mpyr-pf6-p2  | -33.3 | -29.1 | -2170.9 | -6813.1  | -879.3  | -3114.8 | -1276.5 | -3680.0 | -879.4  | -3115.3 | -1276.8 | -3683.3 |
| c2mpyr-pf6-p3  | -32.9 | -28.6 | -2170.3 | -6812.9  | -879.1  | -3114.7 | -1276.5 | -3680.0 | -879.2  | -3115.2 | -1276.8 | -3683.3 |
| c2mpyr-tos-p1  | -41.4 | -36.6 | -2363.1 | -7450.2  | -879.1  | -3114.9 | -1464.0 | -4313.9 | -879.1  | -3115.7 | -1464.4 | -4317.5 |
| c2mpyr-tos-p2  | -38.1 | -33.6 | -2362.1 | -7449.1  | -879.7  | -3115.4 | -1464.0 | -4314.0 | -879.8  | -3116.1 | -1464.3 | -4317.3 |
| c3mim-bf4-p1   | -37.7 | -33.7 | -1880.2 | -5830.7  | -1028.5 | -3380.4 | -834.5  | -2429.9 | -1028.6 | -3381.4 | -834.7  | -2432.5 |
| c3mim-bf4-p2   | -36.7 | -32.9 | -1879.6 | -5830.2  | -1028.5 | -3380.4 | -834.5  | -2429.9 | -1028.6 | -3381.4 | -834.7  | -2432.4 |
| c3mim-br-p1    | -61.4 | -47.1 | -1300.1 | -4002.6  | -1029.9 | -3387.9 | -242.7  | -580.9  | -1030.0 | -3388.3 | -246.7  | -590.7  |
| c3mim-br-p2    | -46.5 | -32.0 | -1294.3 | -3995.9  | -1030.6 | -3389.5 | -242.7  | -580.9  | -1030.7 | -3389.8 | -246.6  | -591.1  |
| c3mim-br-p3    | -51.3 | -36.5 | -1296.2 | -3997.8  | -1030.2 | -3388.9 | -242.7  | -580.9  | -1030.3 | -3389.2 | -246.8  | -591.2  |
| c3mim-br-p4    | -62.0 | -47.7 | -1300.8 | -4003.5  | -1030.2 | -3388.6 | -242.7  | -580.9  | -1030.2 | -3389.0 | -246.7  | -590.6  |
| c3mim-cl-p1    | -42.5 | -38.9 | -1190.4 | -3862.8  | -1029.8 | -3387.6 | -140.6  | -452.7  | -1029.8 | -3388.0 | -140.8  | -455.6  |
| c3mim-cl-p2    | -31.7 | -27.6 | -1187.2 | -3858.9  | -1030.9 | -3390.1 | -140.6  | -452.7  | -1030.9 | -3390.4 | -140.9  | -456.3  |
| c3mim-cl-p3    | -35.5 | -31.4 | -1188.5 | -3860.1  | -1030.4 | -3389.3 | -140.6  | -452.7  | -1030.5 | -3389.6 | -140.9  | -456.2  |
| c3mim-cl-p4    | -42.0 | -38.5 | -1190.5 | -3863.1  | -1030.0 | -3388.2 | -140.6  | -452.7  | -1030.0 | -3388.7 | -140.8  | -455.6  |
| c3mim-dca-p1   | -67.5 | -63.6 | -1709.4 | -5280.4  | -1028.3 | -3380.6 | -650.1  | -1863.3 | -1028.5 | -3381.6 | -650.3  | -1865.9 |
| c3mim-dca-p2   | -69.0 | -65.0 | -1710.4 | -5281.7  | -1028.7 | -3381.2 | -650.1  | -1863.1 | -1028.9 | -3382.3 | -650.3  | -1865.7 |
| c3mim-dca-p3   | -58.5 | -54.6 | -1705.8 | -5276.5  | -1028.8 | -3382.0 | -649.9  | -1863.1 | -1028.9 | -3382.8 | -650.1  | -1865.9 |
| c3mim-dca-p4   | -70.3 | -66.2 | -1711.1 | -5281.5  | -1028.5 | -3380.8 | -650.1  | -1863.0 | -1028.6 | -3381.9 | -650.4  | -1865.6 |
| c3mim-dca-p5   | -66.7 | -62.9 | -1708.3 | -5279.3  | -1027.9 | -3380.0 | -650.0  | -1863.0 | -1028.0 | -3381.1 | -650.2  | -1865.4 |
| c3mim-dca-p6   | -65.5 | -61.9 | -1708.1 | -5278.7  | -1028.0 | -3380.0 | -650.2  | -1863.1 | -1028.1 | -3381.0 | -650.4  | -1865.4 |
| c3mim-mes-p1   | -54.7 | -49.6 | -1848.8 | -5756.4  | -1029.3 | -3381.9 | -793.3  | -2346.0 | -1029.4 | -3383.0 | -793.7  | -2349.4 |
| c3mim-mes-p2   | -47.5 | -43.0 | -1844.0 | -5751.1  | -1028.2 | -3380.0 | -793.3  | -2346.1 | -1028.3 | -3381.1 | -793.7  | -2349.1 |
| c3mim-ntf2-p1  | -85.5 | -77.4 | -3591.2 | -10570.3 | -1028.5 | -3380.5 | -2524.3 | -7142.6 | -1028.7 | -3382.3 | -2524.9 | -7148.2 |
| c3mim-ntf2-p2  | -56.7 | -49.7 | -3578.6 | -10554.2 | -1028.7 | -3381.9 | -2523.8 | -7141.7 | -1028.8 | -3383.1 | -2524.4 | -7146.8 |
| c3mim-ntf2-p3  | -51.2 | -44.7 | -3576.8 | -10549.3 | -1028.2 | -3380.9 | -2524.3 | -7141.6 | -1028.4 | -3382.2 | -2524.8 | -7146.1 |
| c3mim-ntf2-p4  | -73.2 | -66.4 | -3585.5 | -10563.0 | -1028.1 | -3379.7 | -2524.6 | -7142.9 | -1028.2 | -3381.3 | -2525.1 | -7147.5 |
| c3mim-pf6-p1   | -42.7 | -38.1 | -2323.5 | -7083.0  | -1028.2 | -3380.0 | -1276.3 | -3679.3 | -1028.3 | -3381.0 | -1276.6 | -3682.5 |
| c3mim-pf6-p2   | -38.1 | -33.8 | -2321.0 | -7080.0  | -1027.7 | -3379.3 | -1276.4 | -3679.6 | -1027.8 | -3380.3 | -1276.7 | -3682.5 |
| c3mim-tos-p1   | -55.2 | -49.9 | -2519.9 | -7723.5  | -1029.1 | -3381.6 | -1464.4 | -4313.1 | -1029.3 | -3382.8 | -1464.8 | -4316.6 |
| c3mim-tos-p2   | -52.2 | -47.1 | -2518.1 | -7721.5  | -1028.8 | -3381.1 | -1464.4 | -4313.1 | -1029.0 | -3382.3 | -1464.8 | -4316.5 |



|                |       |       |         |          |         |         |         |         |         |         |         |         |
|----------------|-------|-------|---------|----------|---------|---------|---------|---------|---------|---------|---------|---------|
| c3mpyr-bf4-p1  | -35.2 | -31.2 | -1836.7 | -5944.3  | -986.5  | -3496.9 | -834.1  | -2428.3 | -986.5  | -3497.6 | -834.3  | -2431.3 |
| c3mpyr-bf4-p2  | -32.8 | -29.0 | -1835.9 | -5943.3  | -986.8  | -3497.1 | -834.1  | -2428.4 | -986.9  | -3497.8 | -834.3  | -2431.2 |
| c3mpyr-bf4-p3  | -32.6 | -28.9 | -1835.5 | -5943.1  | -986.5  | -3497.0 | -834.1  | -2428.4 | -986.6  | -3497.6 | -834.3  | -2431.2 |
| c3mpyr-br-p1   | -61.9 | -46.6 | -1257.1 | -4113.4  | -987.2  | -3497.8 | -242.7  | -580.9  | -987.2  | -3498.1 | -246.9  | -591.6  |
| c3mpyr-br-p2   | -58.6 | -43.9 | -1255.4 | -4111.6  | -987.0  | -3497.8 | -242.7  | -580.9  | -987.0  | -3498.1 | -246.7  | -591.2  |
| c3mpyr-br-p3   | -58.7 | -44.3 | -1255.5 | -4111.7  | -987.1  | -3497.9 | -242.7  | -580.9  | -987.1  | -3498.2 | -246.7  | -590.9  |
| c3mpyr-cl-p1   | -43.6 | -39.7 | -1147.9 | -3974.1  | -987.2  | -3497.9 | -140.6  | -452.7  | -987.2  | -3498.2 | -140.9  | -456.1  |
| c3mpyr-cl-p2   | -42.3 | -38.4 | -1147.1 | -3973.4  | -986.9  | -3497.9 | -140.6  | -452.7  | -986.9  | -3498.2 | -140.9  | -456.1  |
| c3mpyr-cl-p3   | -42.0 | -38.2 | -1147.1 | -3973.4  | -987.1  | -3498.0 | -140.6  | -452.7  | -987.2  | -3498.3 | -140.9  | -456.0  |
| c3mpyr-dca-p1  | -46.1 | -43.0 | -1653.0 | -5370.2  | -986.7  | -3497.2 | -644.3  | -1848.8 | -986.8  | -3497.8 | -644.5  | -1851.1 |
| c3mpyr-dca-p2  | -48.4 | -45.2 | -1653.7 | -5371.7  | -986.6  | -3497.1 | -644.3  | -1849.0 | -986.6  | -3497.8 | -644.5  | -1851.3 |
| c3mpyr-dca-p3  | -44.1 | -40.8 | -1650.4 | -5371.5  | -986.7  | -3497.2 | -644.3  | -1849.7 | -986.8  | -3497.8 | -644.5  | -1852.0 |
| c3mpyr-dca-p4  | -47.1 | -43.9 | -1653.0 | -5371.3  | -986.9  | -3497.3 | -644.2  | -1848.8 | -986.9  | -3498.0 | -644.4  | -1851.1 |
| c3mpyr-dca-p5  | -49.1 | -45.9 | -1653.8 | -5372.2  | -986.7  | -3497.1 | -644.2  | -1848.9 | -986.7  | -3497.8 | -644.4  | -1851.2 |
| c3mpyr-mes-p1  | -44.1 | -39.2 | -1800.9 | -5867.2  | -986.5  | -3497.1 | -793.3  | -2347.1 | -986.6  | -3497.9 | -793.7  | -2350.7 |
| c3mpyr-mes-p2  | -40.1 | -35.5 | -1799.6 | -5865.7  | -987.1  | -3497.6 | -793.3  | -2347.2 | -987.2  | -3498.3 | -793.7  | -2350.6 |
| c3mpyr-mes-p3  | -39.4 | -34.9 | -1798.9 | -5865.1  | -986.6  | -3497.5 | -793.3  | -2347.1 | -986.7  | -3498.2 | -793.7  | -2350.5 |
| c3mpyr-ntf2-p1 | -54.7 | -48.4 | -3534.0 | -10669.0 | -986.9  | -3497.1 | -2522.8 | -7141.6 | -986.9  | -3498.0 | -2523.3 | -7146.4 |
| c3mpyr-ntf2-p2 | -42.2 | -36.6 | -3528.6 | -10660.0 | -986.5  | -3496.7 | -2522.6 | -7140.6 | -986.6  | -3497.6 | -2523.1 | -7144.8 |
| c3mpyr-ntf2-p3 | -51.6 | -45.5 | -3532.3 | -10667.0 | -986.5  | -3496.8 | -2522.8 | -7141.6 | -986.6  | -3497.7 | -2523.3 | -7146.2 |
| c3mpyr-ntf2-p4 | -52.5 | -46.3 | -3532.7 | -10667.5 | -986.6  | -3496.9 | -2522.7 | -7141.4 | -986.7  | -3497.9 | -2523.2 | -7146.1 |
| c3mpyr-ntf2-p5 | -43.9 | -38.3 | -3528.9 | -10660.8 | -986.3  | -3496.6 | -2522.5 | -7140.4 | -986.4  | -3497.5 | -2522.9 | -7144.6 |
| c3mpyr-ntf2-p6 | -43.3 | -37.7 | -3529.1 | -10660.9 | -986.7  | -3496.9 | -2522.6 | -7140.5 | -986.7  | -3497.8 | -2523.1 | -7144.8 |
| c3mpyr-pf6-p1  | -36.5 | -31.8 | -2279.3 | -7196.8  | -986.4  | -3496.7 | -1276.5 | -3679.9 | -986.4  | -3497.4 | -1276.9 | -3683.6 |
| c3mpyr-pf6-p2  | -33.3 | -28.9 | -2278.1 | -7195.2  | -986.7  | -3496.9 | -1276.5 | -3680.0 | -986.7  | -3497.5 | -1276.8 | -3683.3 |
| c3mpyr-pf6-p3  | -33.5 | -29.1 | -2277.9 | -7195.4  | -986.5  | -3496.8 | -1276.5 | -3680.0 | -986.5  | -3497.5 | -1276.9 | -3683.4 |
| c3mpyr-tos-p1  | -42.5 | -37.5 | -2470.9 | -7833.0  | -986.5  | -3497.1 | -1464.0 | -4313.9 | -986.5  | -3498.0 | -1464.3 | -4317.6 |
| c3mpyr-tos-p2  | -38.5 | -33.8 | -2469.6 | -7831.4  | -987.1  | -3497.5 | -1464.0 | -4313.9 | -987.2  | -3498.3 | -1464.3 | -4317.4 |
| c4mim-bf4-p1   | -38.3 | -34.2 | -1987.8 | -6212.7  | -1135.8 | -3762.0 | -834.5  | -2429.9 | -1135.9 | -3763.0 | -834.7  | -2432.6 |
| c4mim-bf4-p2   | -36.9 | -33.0 | -1987.0 | -6211.8  | -1135.8 | -3761.8 | -834.5  | -2429.9 | -1135.9 | -3762.8 | -834.7  | -2432.4 |
| c4mim-br-p1    | -62.8 | -48.0 | -1408.0 | -4385.6  | -1137.3 | -3770.0 | -242.7  | -580.9  | -1137.3 | -3770.4 | -246.9  | -591.0  |
| c4mim-br-p2    | -48.0 | -33.0 | -1402.3 | -4378.9  | -1138.0 | -3771.7 | -242.7  | -580.9  | -1138.1 | -3772.0 | -246.8  | -591.4  |
| c4mim-br-p3    | -53.9 | -38.3 | -1404.7 | -4381.4  | -1137.6 | -3771.0 | -242.7  | -580.9  | -1137.6 | -3771.3 | -247.0  | -591.8  |
| c4mim-br-p4    | -63.0 | -48.2 | -1408.4 | -4386.1  | -1137.5 | -3770.5 | -242.7  | -580.9  | -1137.5 | -3771.0 | -246.8  | -591.0  |
| c4mim-cl-p1    | -43.1 | -39.4 | -1298.0 | -4245.3  | -1137.1 | -3769.7 | -140.6  | -452.7  | -1137.2 | -3770.2 | -140.8  | -455.7  |
| c4mim-cl-p2    | -32.3 | -28.1 | -1294.8 | -4241.3  | -1138.2 | -3772.2 | -140.6  | -452.7  | -1138.3 | -3772.5 | -140.9  | -456.3  |
| c4mim-cl-p3    | -36.9 | -32.7 | -1296.4 | -4243.0  | -1137.8 | -3771.4 | -140.6  | -452.7  | -1137.8 | -3771.7 | -140.9  | -456.3  |
| c4mim-cl-p4    | -42.5 | -38.9 | -1297.9 | -4245.3  | -1137.3 | -3770.2 | -140.6  | -452.7  | -1137.3 | -3770.6 | -140.8  | -455.6  |
| c4mim-dca-p1   | -68.3 | -64.2 | -1817.1 | -5662.5  | -1135.7 | -3762.2 | -650.1  | -1863.3 | -1135.8 | -3763.2 | -650.3  | -1866.0 |



|                |       |       |         |          |         |         |         |         |         |         |         |         |
|----------------|-------|-------|---------|----------|---------|---------|---------|---------|---------|---------|---------|---------|
| c4mim-dca-p2   | -71.9 | -67.7 | -1819.3 | -5664.2  | -1135.9 | -3762.4 | -650.1  | -1863.0 | -1136.0 | -3763.5 | -650.4  | -1865.8 |
| c4mim-dca-p3   | -67.0 | -63.2 | -1815.7 | -5661.0  | -1135.2 | -3761.5 | -650.0  | -1863.0 | -1135.3 | -3762.6 | -650.2  | -1865.4 |
| c4mim-mes-p1   | -56.0 | -50.7 | -1956.7 | -6138.7  | -1136.7 | -3763.5 | -793.3  | -2346.0 | -1136.8 | -3764.6 | -793.7  | -2349.6 |
| c4mim-mes-p2   | -47.6 | -43.0 | -1951.3 | -6132.6  | -1135.4 | -3761.4 | -793.3  | -2346.1 | -1135.5 | -3762.5 | -793.7  | -2349.1 |
| c4mim-pf6-p1   | -44.9 | -39.6 | -2432.3 | -7466.3  | -1135.8 | -3762.0 | -1276.4 | -3679.5 | -1135.9 | -3763.1 | -1276.7 | -3683.3 |
| c4mim-pf6-p2   | -38.1 | -33.8 | -2428.3 | -7461.6  | -1135.0 | -3760.8 | -1276.4 | -3679.6 | -1135.1 | -3761.8 | -1276.7 | -3682.5 |
| c4mim-tos-p1   | -57.5 | -51.9 | -2628.3 | -8106.5  | -1136.5 | -3763.3 | -1464.4 | -4313.1 | -1136.7 | -3764.6 | -1464.8 | -4316.8 |
| c4mim-tos-p2   | -53.3 | -48.1 | -2626.4 | -8104.0  | -1136.5 | -3763.1 | -1464.4 | -4313.1 | -1136.6 | -3764.3 | -1464.8 | -4316.5 |
| c4mpyr-bf4-p1  | -35.3 | -31.3 | -1943.9 | -6326.1  | -1093.7 | -3878.6 | -834.1  | -2428.4 | -1093.8 | -3879.3 | -834.3  | -2431.4 |
| c4mpyr-bf4-p2  | -33.0 | -29.1 | -1943.2 | -6325.2  | -1094.0 | -3878.9 | -834.1  | -2428.4 | -1094.1 | -3879.6 | -834.3  | -2431.2 |
| c4mpyr-bf4-p3  | -32.9 | -29.0 | -1942.8 | -6325.1  | -1093.8 | -3878.8 | -834.1  | -2428.4 | -1093.8 | -3879.5 | -834.3  | -2431.3 |
| c4mpyr-br-p1   | -62.5 | -46.8 | -1364.5 | -4495.5  | -1094.4 | -3879.6 | -242.7  | -580.9  | -1094.4 | -3879.9 | -247.0  | -591.8  |
| c4mpyr-br-p2   | -59.4 | -44.2 | -1362.8 | -4494.0  | -1094.2 | -3879.7 | -242.7  | -580.9  | -1094.2 | -3879.9 | -246.9  | -591.5  |
| c4mpyr-br-p3   | -59.3 | -44.6 | -1363.0 | -4493.9  | -1094.3 | -3879.7 | -242.7  | -580.9  | -1094.3 | -3880.0 | -246.8  | -591.2  |
| c4mpyr-cl-p1   | -43.6 | -39.7 | -1255.1 | -4355.9  | -1094.4 | -3879.6 | -140.6  | -452.7  | -1094.4 | -3879.9 | -140.9  | -456.1  |
| c4mpyr-cl-p2   | -42.8 | -38.9 | -1254.5 | -4355.7  | -1094.2 | -3879.9 | -140.6  | -452.7  | -1094.2 | -3880.2 | -140.9  | -456.2  |
| c4mpyr-cl-p3   | -42.0 | -38.2 | -1254.3 | -4355.2  | -1094.4 | -3879.8 | -140.6  | -452.7  | -1094.4 | -3880.1 | -140.9  | -456.0  |
| c4mpyr-dca-p1  | -46.3 | -43.0 | -1759.3 | -5752.8  | -1093.9 | -3878.7 | -644.2  | -1849.0 | -1093.9 | -3879.4 | -644.4  | -1851.4 |
| c4mpyr-dca-p2  | -48.4 | -45.2 | -1760.9 | -5753.6  | -1093.9 | -3879.0 | -644.3  | -1849.0 | -1093.9 | -3879.6 | -644.5  | -1851.3 |
| c4mpyr-dca-p3  | -46.9 | -43.7 | -1760.5 | -5752.4  | -1093.9 | -3878.9 | -644.3  | -1848.8 | -1094.0 | -3879.6 | -644.5  | -1851.1 |
| c4mpyr-dca-p4  | -47.8 | -44.6 | -1760.2 | -5753.6  | -1093.8 | -3878.9 | -644.3  | -1849.0 | -1093.9 | -3879.6 | -644.5  | -1851.3 |
| c4mpyr-dca-p5  | -49.2 | -46.0 | -1761.1 | -5754.1  | -1093.9 | -3878.9 | -644.2  | -1848.9 | -1093.9 | -3879.6 | -644.4  | -1851.3 |
| c4mpyr-mes-p1  | -44.1 | -39.2 | -1908.1 | -6249.1  | -1093.7 | -3878.9 | -793.3  | -2347.1 | -1093.8 | -3879.7 | -793.7  | -2350.8 |
| c4mpyr-mes-p2  | -40.6 | -35.9 | -1907.0 | -6247.9  | -1094.4 | -3879.4 | -793.3  | -2347.2 | -1094.4 | -3880.2 | -793.7  | -2350.7 |
| c4mpyr-mes-p3  | -39.7 | -35.1 | -1906.2 | -6247.1  | -1093.9 | -3879.3 | -793.3  | -2347.1 | -1094.0 | -3880.0 | -793.7  | -2350.6 |
| c4mpyr-ntf2-p1 | -54.9 | -48.4 | -3641.1 | -11050.8 | -1094.0 | -3878.8 | -2522.8 | -7141.5 | -1094.1 | -3879.8 | -2523.3 | -7146.4 |
| c4mpyr-ntf2-p2 | -47.2 | -41.1 | -3637.8 | -11044.3 | -1093.7 | -3878.5 | -2522.5 | -7140.2 | -1093.8 | -3879.4 | -2523.0 | -7144.8 |
| c4mpyr-ntf2-p3 | -52.9 | -46.7 | -3640.2 | -11049.6 | -1093.7 | -3878.7 | -2522.8 | -7141.5 | -1093.8 | -3879.6 | -2523.3 | -7146.3 |
| c4mpyr-ntf2-p4 | -53.6 | -47.2 | -3640.4 | -11050.0 | -1093.8 | -3878.7 | -2522.8 | -7141.5 | -1093.9 | -3879.7 | -2523.3 | -7146.3 |
| c4mpyr-ntf2-p5 | -44.6 | -38.9 | -3636.4 | -11043.1 | -1093.5 | -3878.4 | -2522.5 | -7140.4 | -1093.6 | -3879.3 | -2522.9 | -7144.7 |
| c4mpyr-ntf2-p6 | -45.0 | -39.1 | -3637.0 | -11043.6 | -1093.9 | -3878.7 | -2522.6 | -7140.5 | -1094.0 | -3879.7 | -2523.0 | -7144.9 |
| c4mpyr-pf6-p1  | -36.6 | -31.8 | -2386.5 | -7578.7  | -1093.6 | -3878.5 | -1276.5 | -3680.0 | -1093.7 | -3879.2 | -1276.9 | -3683.6 |
| c4mpyr-pf6-p2  | -33.8 | -29.3 | -2385.5 | -7577.4  | -1093.9 | -3878.7 | -1276.5 | -3680.0 | -1094.0 | -3879.4 | -1276.8 | -3683.4 |
| c4mpyr-pf6-p3  | -33.8 | -29.3 | -2385.3 | -7577.5  | -1093.7 | -3878.7 | -1276.5 | -3680.0 | -1093.8 | -3879.3 | -1276.9 | -3683.5 |
| c4mpyr-tos-p1  | -42.7 | -37.7 | -2578.3 | -8215.1  | -1093.8 | -3879.0 | -1464.0 | -4313.9 | -1093.8 | -3879.8 | -1464.4 | -4317.6 |
| c4mpyr-tos-p2  | -39.2 | -34.3 | -2577.1 | -8213.7  | -1094.3 | -3879.4 | -1464.0 | -4313.9 | -1094.4 | -3880.2 | -1464.4 | -4317.5 |



## 2.2.14 ACC5 basis set

Table S 15: Raw ACC5 energies. Superscript \* indicates monomer calculated in the dimer basis set.

| ion pair      | E(int) | E(int) CP | E(dimer) SS | E(dimer) OS | E(A) SS | E(A) OS | E(B) SS | E(B) OS | E(A) SS* | E(A) OS* | E(B) SS* | E(B) OS* |
|---------------|--------|-----------|-------------|-------------|---------|---------|---------|---------|----------|----------|----------|----------|
| c1mim-bf4-p1  | -33.5  | -31.7     | -1677.3     | -5212.7     | -817.6  | -2677.5 | -844.0  | -2517.4 | -817.7   | -2677.9  | -844.1   | -2518.6  |
| c1mim-cl-p1   | -39.8  | -37.6     | -981.0      | -3177.9     | -819.4  | -2684.6 | -142.5  | -472.5  | -819.4   | -2684.8  | -142.6   | -474.5   |
| c1mim-cl-p2   | -28.5  | -25.9     | -976.4      | -3172.0     | -819.5  | -2685.3 | -142.5  | -472.5  | -819.6   | -2685.5  | -142.6   | -474.9   |
| c1mim-dca-p1  | -63.7  | -62.1     | -1503.0     | -4623.7     | -818.1  | -2678.7 | -654.9  | -1911.3 | -818.1   | -2679.1  | -655.0   | -1912.4  |
| c1mim-dca-p2  | -46.8  | -45.1     | -1495.1     | -4615.4     | -818.2  | -2679.7 | -654.6  | -1911.3 | -818.2   | -2680.0  | -654.6   | -1912.5  |
| c1mim-mes-p1  | -44.9  | -42.8     | -1642.8     | -5122.5     | -818.1  | -2678.4 | -802.5  | -2421.4 | -818.2   | -2678.8  | -802.6   | -2422.9  |
| c1mim-ntf2-p1 | -72.1  | -68.9     | -3404.9     | -10104.5    | -817.7  | -2677.6 | -2553.8 | -7388.2 | -817.7   | -2678.3  | -2553.9  | -7390.5  |
| c1mim-ntf2-p2 | -38.7  | -35.9     | -3389.7     | -10085.5    | -817.9  | -2679.2 | -2552.9 | -7386.5 | -818.0   | -2679.7  | -2553.1  | -7388.6  |
| c1mim-ntf2-p3 | -43.4  | -40.6     | -3392.9     | -10087.6    | -817.7  | -2678.3 | -2553.8 | -7387.3 | -817.7   | -2678.9  | -2553.9  | -7389.4  |
| c1mim-pf6-p1  | -36.3  | -34.1     | -2126.7     | -6512.6     | -817.6  | -2677.6 | -1292.2 | -3815.6 | -817.7   | -2678.0  | -1292.4  | -3817.2  |
| c1mim-tos-p1  | -42.9  | -40.7     | -2316.8     | -7133.4     | -817.8  | -2678.1 | -1477.8 | -4433.6 | -817.9   | -2678.6  | -1478.0  | -4435.1  |
| c1mpyr-bf4-p1 | -32.8  | -30.8     | -1632.7     | -5321.9     | -773.4  | -2788.9 | -843.6  | -2515.9 | -773.4   | -2789.2  | -843.7   | -2517.5  |
| c1mpyr-bf4-p2 | -30.2  | -28.4     | -1631.5     | -5320.9     | -773.5  | -2789.0 | -843.6  | -2515.9 | -773.6   | -2789.3  | -843.7   | -2517.4  |
| c1mpyr-cl-p1  | -42.1  | -39.4     | -936.4      | -3284.9     | -774.2  | -2790.0 | -142.5  | -472.5  | -774.2   | -2790.1  | -142.6   | -474.9   |
| c1mpyr-cl-p2  | -40.9  | -38.3     | -935.7      | -3284.5     | -774.1  | -2790.1 | -142.5  | -472.5  | -774.2   | -2790.2  | -142.6   | -474.9   |
| c1mpyr-dca-p1 | -43.5  | -42.2     | -1444.3     | -4709.1     | -774.0  | -2789.6 | -649.0  | -1897.3 | -774.0   | -2789.9  | -649.1   | -1898.3  |
| c1mpyr-dca-p2 | -47.6  | -46.1     | -1445.5     | -4711.7     | -773.8  | -2789.3 | -649.0  | -1897.6 | -773.8   | -2789.6  | -649.1   | -1898.7  |
| c1mpyr-dca-p3 | -43.8  | -42.4     | -1442.3     | -4711.0     | -773.5  | -2789.1 | -648.9  | -1898.0 | -773.5   | -2789.4  | -648.9   | -1899.1  |
| c1mpyr-dca-p4 | -45.9  | -44.5     | -1444.4     | -4710.7     | -773.5  | -2789.1 | -649.0  | -1897.6 | -773.5   | -2789.4  | -649.1   | -1898.7  |



## 2.2.15 CC(D+d) basis set

Table S 16: Raw CC(D+d) energies. Superscript \* indicates monomer calculated in the dimer basis set.

| ion pair       | E(int) | E(int) CP | E(dimer) SS | E(dimer) OS | E(A) SS | E(A) OS | E(B) SS | E(B) OS | E(A) SS* | E(A) OS* | E(B) SS* | E(B) OS* |
|----------------|--------|-----------|-------------|-------------|---------|---------|---------|---------|----------|----------|----------|----------|
| clmim-bf4-p1   | -34.2  | -14.5     | -1294.2     | -3566.1     | -669.7  | -1957.2 | -611.2  | -1588.1 | -670.4   | -1959.2  | -616.7   | -1599.5  |
| clmim-br-p1    | -36.4  | -22.0     | -789.0      | -2224.7     | -672.0  | -1967.2 | -101.1  | -237.0  | -672.5   | -1968.5  | -104.4   | -246.3   |
| clmim-br-p2    | -23.8  | -13.3     | -784.6      | -2216.9     | -671.8  | -1967.9 | -101.1  | -237.0  | -672.0   | -1968.4  | -103.5   | -244.3   |
| clmim-cl-p1    | -33.1  | -15.9     | -783.6      | -2248.1     | -671.8  | -1966.8 | -98.1   | -261.8  | -672.3   | -1968.1  | -102.3   | -273.1   |
| clmim-cl-p2    | -25.3  | -12.1     | -782.1      | -2243.7     | -672.0  | -1968.5 | -98.1   | -261.8  | -672.2   | -1969.0  | -101.2   | -271.2   |
| clmim-dca-p1   | -55.0  | -40.7     | -1228.7     | -3362.6     | -670.1  | -1958.6 | -533.7  | -1373.9 | -671.2   | -1961.2  | -537.1   | -1381.2  |
| clmim-dca-p2   | -41.8  | -30.9     | -1223.5     | -3356.2     | -670.3  | -1960.1 | -533.4  | -1374.0 | -670.8   | -1961.4  | -536.1   | -1380.5  |
| clmim-mes-p1   | -43.6  | -18.9     | -1295.0     | -3602.4     | -670.1  | -1958.0 | -605.6  | -1620.3 | -670.9   | -1960.1  | -612.8   | -1634.7  |
| clmim-ntf2-p1  | -68.7  | -44.4     | -2610.7     | -6845.7     | -669.7  | -1957.4 | -1911.4 | -4849.2 | -670.6   | -1959.9  | -1918.4  | -4863.0  |
| clmim-ntf2-p2  | -42.3  | -25.7     | -2600.4     | -6829.8     | -670.1  | -1959.7 | -1910.7 | -4847.4 | -670.5   | -1960.8  | -1915.5  | -4857.6  |
| clmim-ntf2-p3  | -40.7  | -20.8     | -2599.9     | -6828.5     | -669.8  | -1958.4 | -1911.3 | -4848.3 | -670.4   | -1960.1  | -1917.2  | -4860.0  |
| clmim-pf6-p1   | -37.0  | -16.0     | -1604.1     | -4366.9     | -669.7  | -1957.3 | -919.8  | -2387.2 | -670.2   | -1959.0  | -926.1   | -2399.7  |
| clmim-tos-p1   | -39.6  | -16.8     | -1859.1     | -5084.1     | -669.8  | -1957.8 | -1171.4 | -3104.6 | -670.6   | -1959.9  | -1178.0  | -3117.8  |
| clmpyr-bf4-p1  | -36.4  | -16.7     | -1257.3     | -3662.4     | -631.2  | -2054.5 | -610.9  | -1586.7 | -631.5   | -2055.5  | -616.7   | -1599.2  |
| clmpyr-bf4-p2  | -33.4  | -15.9     | -1256.2     | -3660.8     | -631.3  | -2054.7 | -610.9  | -1586.7 | -631.7   | -2055.6  | -616.1   | -1597.9  |
| clmpyr-br-p1   | -39.3  | -26.6     | -750.6      | -2314.4     | -631.8  | -2055.8 | -101.1  | -237.0  | -632.0   | -2056.3  | -104.3   | -245.9   |
| clmpyr-br-p2   | -37.5  | -25.5     | -749.8      | -2313.7     | -631.8  | -2056.1 | -101.1  | -237.0  | -632.0   | -2056.5  | -104.0   | -245.4   |
| clmpyr-cl-p1   | -37.3  | -22.4     | -746.1      | -2338.8     | -631.8  | -2055.9 | -98.1   | -261.8  | -632.0   | -2056.3  | -101.9   | -272.3   |
| clmpyr-cl-p2   | -36.3  | -22.1     | -745.7      | -2338.5     | -631.8  | -2056.1 | -98.1   | -261.8  | -632.0   | -2056.5  | -101.6   | -271.9   |
| clmpyr-dca-p1  | -39.5  | -28.4     | -1177.7     | -3433.1     | -631.7  | -2055.4 | -527.0  | -1357.2 | -632.1   | -2056.4  | -530.1   | -1363.7  |
| clmpyr-dca-p2  | -43.6  | -31.9     | -1178.9     | -3435.8     | -631.5  | -2055.0 | -527.0  | -1357.6 | -632.0   | -2056.2  | -530.2   | -1364.3  |
| clmpyr-dca-p3  | -40.3  | -29.3     | -1175.9     | -3435.9     | -631.3  | -2054.8 | -527.1  | -1358.4 | -631.7   | -2055.9  | -529.9   | -1365.2  |
| clmpyr-dca-p4  | -41.9  | -30.8     | -1177.9     | -3434.6     | -631.3  | -2054.8 | -527.0  | -1357.6 | -631.7   | -2056.0  | -530.1   | -1363.9  |
| clmpyr-mes-p1  | -43.3  | -19.5     | -1256.9     | -3700.1     | -631.2  | -2055.0 | -605.7  | -1621.9 | -631.6   | -2056.1  | -613.1   | -1636.8  |
| clmpyr-mes-p2  | -38.9  | -18.0     | -1255.3     | -3698.1     | -631.4  | -2055.5 | -605.7  | -1621.9 | -631.8   | -2056.5  | -612.0   | -1635.1  |
| clmpyr-ntf2-p1 | -52.6  | -33.4     | -2564.6     | -6933.6     | -631.5  | -2054.5 | -1910.4 | -4849.2 | -631.9   | -2055.5  | -1916.3  | -4861.0  |
| clmpyr-ntf2-p2 | -40.7  | -22.4     | -2559.7     | -6925.3     | -631.2  | -2054.3 | -1910.4 | -4848.4 | -631.6   | -2055.2  | -1916.1  | -4859.7  |
| clmpyr-ntf2-p3 | -51.2  | -32.6     | -2564.1     | -6932.5     | -631.4  | -2054.8 | -1910.3 | -4849.0 | -631.8   | -2055.7  | -1916.1  | -4860.4  |
| clmpyr-ntf2-p5 | -42.3  | -23.1     | -2560.5     | -6926.2     | -631.4  | -2054.5 | -1910.4 | -4848.2 | -631.8   | -2055.5  | -1916.3  | -4860.1  |
| clmpyr-pf6-p1  | -37.7  | -17.2     | -1566.7     | -4464.0     | -631.2  | -2054.4 | -919.9  | -2387.5 | -631.5   | -2055.2  | -926.3   | -2400.6  |
| clmpyr-pf6-p2  | -35.1  | -16.2     | -1565.7     | -4462.7     | -631.3  | -2054.6 | -919.9  | -2387.7 | -631.5   | -2055.2  | -925.8   | -2399.7  |
| clmpyr-tos-p1  | -39.2  | -16.6     | -1820.7     | -5181.2     | -631.2  | -2055.0 | -1170.8 | -3105.6 | -631.6   | -2056.1  | -1177.9  | -3119.7  |
| clmpyr-tos-p2  | -34.3  | -14.4     | -1818.4     | -5178.7     | -631.3  | -2055.1 | -1170.8 | -3105.6 | -631.7   | -2056.0  | -1177.0  | -3117.9  |



|               |       |       |         |         |        |         |         |         |        |         |         |         |
|---------------|-------|-------|---------|---------|--------|---------|---------|---------|--------|---------|---------|---------|
| c2mim-bf4-p1  | -36.3 | -14.9 | -1385.3 | -3855.9 | -759.7 | -2246.0 | -611.2  | -1588.1 | -760.4 | -2248.0 | -617.3  | -1600.7 |
| c2mim-bf4-p2  | -33.9 | -14.4 | -1383.8 | -3854.0 | -759.2 | -2245.3 | -611.2  | -1588.1 | -759.9 | -2247.2 | -616.7  | -1599.5 |
| c2mim-br-p1   | -37.3 | -22.4 | -879.0  | -2513.8 | -761.6 | -2255.8 | -101.1  | -237.0  | -762.1 | -2257.0 | -104.6  | -246.7  |
| c2mim-br-p2   | -27.6 | -15.5 | -876.9  | -2509.3 | -762.4 | -2258.1 | -101.1  | -237.0  | -762.7 | -2258.8 | -103.9  | -245.3  |
| c2mim-br-p3   | -27.3 | -15.4 | -876.1  | -2508.4 | -761.8 | -2257.3 | -101.1  | -237.0  | -762.0 | -2257.9 | -104.0  | -245.2  |
| c2mim-br-p4   | -37.7 | -23.1 | -879.6  | -2514.8 | -762.0 | -2256.6 | -101.1  | -237.0  | -762.5 | -2257.9 | -104.5  | -246.4  |
| c2mim-cl-p1   | -34.3 | -16.3 | -873.8  | -2537.6 | -761.5 | -2255.6 | -98.1   | -261.8  | -762.0 | -2256.8 | -102.5  | -273.8  |
| c2mim-cl-p2   | -28.2 | -13.4 | -873.9  | -2535.6 | -762.6 | -2258.8 | -98.1   | -261.8  | -762.9 | -2259.4 | -101.7  | -272.2  |
| c2mim-cl-p3   | -28.0 | -13.2 | -873.2  | -2534.7 | -762.0 | -2257.9 | -98.1   | -261.8  | -762.2 | -2258.5 | -101.8  | -272.2  |
| c2mim-cl-p4   | -34.1 | -16.6 | -873.9  | -2538.0 | -761.8 | -2256.1 | -98.1   | -261.8  | -762.3 | -2257.4 | -102.4  | -273.2  |
| c2mim-dca-p1  | -57.0 | -42.9 | -1319.0 | -3652.2 | -759.6 | -2246.6 | -533.6  | -1374.3 | -760.6 | -2249.1 | -537.0  | -1381.5 |
| c2mim-dca-p2  | -53.7 | -39.8 | -1317.9 | -3650.0 | -759.8 | -2246.6 | -533.6  | -1374.1 | -760.7 | -2249.1 | -537.1  | -1381.2 |
| c2mim-dca-p3  | -57.5 | -42.9 | -1319.9 | -3652.4 | -760.0 | -2246.8 | -533.8  | -1374.1 | -761.0 | -2249.3 | -537.4  | -1381.8 |
| c2mim-dca-p4  | -54.2 | -40.8 | -1318.0 | -3650.2 | -759.7 | -2246.6 | -533.7  | -1374.1 | -760.6 | -2249.0 | -536.9  | -1380.9 |
| c2mim-dca-p5  | -55.4 | -41.0 | -1318.5 | -3651.0 | -759.7 | -2246.7 | -533.8  | -1373.9 | -760.7 | -2249.3 | -537.1  | -1381.3 |
| c2mim-dca-p6  | -55.5 | -41.3 | -1318.1 | -3651.0 | -759.6 | -2246.2 | -533.8  | -1374.1 | -760.6 | -2248.8 | -537.1  | -1381.2 |
| c2mim-mes-p1  | -49.0 | -22.5 | -1387.7 | -3894.3 | -760.3 | -2247.1 | -605.5  | -1620.1 | -761.1 | -2249.2 | -613.4  | -1635.8 |
| c2mim-mes-p2  | -44.7 | -19.6 | -1384.9 | -3891.2 | -759.6 | -2246.0 | -605.6  | -1620.3 | -760.4 | -2248.0 | -613.0  | -1635.1 |
| c2mim-ntf2-p1 | -74.9 | -48.0 | -2703.5 | -7137.9 | -759.7 | -2246.2 | -1911.4 | -4849.1 | -760.7 | -2248.7 | -1919.3 | -4864.6 |
| c2mim-ntf2-p2 | -53.4 | -32.0 | -2695.2 | -7125.8 | -760.1 | -2248.2 | -1911.1 | -4848.4 | -760.6 | -2249.6 | -1917.4 | -4861.4 |
| c2mim-ntf2-p3 | -44.6 | -22.7 | -2691.6 | -7119.0 | -759.6 | -2246.9 | -1911.3 | -4848.2 | -760.2 | -2248.5 | -1917.8 | -4861.3 |
| c2mim-ntf2-p4 | -65.4 | -41.4 | -2699.7 | -7132.6 | -759.6 | -2246.1 | -1911.7 | -4849.5 | -760.5 | -2248.4 | -1918.6 | -4863.4 |
| c2mim-pf6-p1  | -41.4 | -17.3 | -1695.9 | -4657.9 | -759.6 | -2245.9 | -919.8  | -2387.2 | -760.2 | -2247.7 | -927.1  | -2401.6 |
| c2mim-pf6-p2  | -37.4 | -16.3 | -1693.7 | -4655.2 | -759.2 | -2245.3 | -919.8  | -2387.2 | -759.8 | -2246.9 | -926.1  | -2399.8 |
| c2mim-tos-p1  | -46.8 | -20.8 | -1952.6 | -5376.9 | -760.2 | -2246.9 | -1171.3 | -3104.4 | -761.0 | -2249.2 | -1179.0 | -3119.5 |
| c2mim-tos-p2  | -41.5 | -17.5 | -1949.7 | -5373.3 | -759.6 | -2246.0 | -1171.3 | -3104.5 | -760.4 | -2248.2 | -1178.4 | -3118.4 |
| c2mpyr-bf4-p1 | -37.2 | -17.0 | -1348.9 | -3953.8 | -722.5 | -2345.4 | -610.9  | -1586.7 | -722.9 | -2346.5 | -616.9  | -1599.5 |
| c2mpyr-bf4-p2 | -35.3 | -16.2 | -1348.7 | -3953.2 | -723.0 | -2345.9 | -610.9  | -1586.7 | -723.4 | -2347.0 | -616.5  | -1598.8 |
| c2mpyr-bf4-p3 | -34.3 | -16.3 | -1347.9 | -3952.4 | -722.6 | -2345.7 | -610.9  | -1586.7 | -723.0 | -2346.6 | -616.2  | -1598.2 |
| c2mpyr-br-p1  | -40.2 | -27.1 | -842.3  | -2605.8 | -723.1 | -2346.6 | -101.1  | -237.0  | -723.4 | -2347.2 | -104.4  | -246.1  |
| c2mpyr-br-p2  | -39.2 | -26.4 | -841.8  | -2605.7 | -723.0 | -2347.2 | -101.1  | -237.0  | -723.3 | -2347.8 | -104.3  | -245.9  |
| c2mpyr-br-p3  | -38.3 | -26.0 | -841.4  | -2604.9 | -723.1 | -2346.8 | -101.1  | -237.0  | -723.3 | -2347.3 | -104.1  | -245.6  |
| c2mpyr-cl-p1  | -37.9 | -22.7 | -837.7  | -2630.1 | -723.2 | -2346.7 | -98.1   | -261.8  | -723.4 | -2347.2 | -102.0  | -272.5  |
| c2mpyr-cl-p2  | -37.1 | -22.4 | -837.1  | -2629.9 | -722.9 | -2347.0 | -98.1   | -261.8  | -723.1 | -2347.5 | -101.8  | -272.2  |
| c2mpyr-cl-p3  | -36.6 | -22.2 | -837.1  | -2629.6 | -723.2 | -2346.9 | -98.1   | -261.8  | -723.4 | -2347.4 | -101.7  | -272.0  |
| c2mpyr-dca-p1 | -39.8 | -28.6 | -1269.1 | -3724.1 | -723.0 | -2346.2 | -527.0  | -1357.3 | -723.5 | -2347.3 | -530.1  | -1363.7 |
| c2mpyr-dca-p2 | -43.1 | -31.3 | -1270.2 | -3726.2 | -722.7 | -2345.9 | -527.1  | -1357.7 | -723.2 | -2347.2 | -530.3  | -1364.3 |
| c2mpyr-dca-p3 | -44.1 | -32.3 | -1270.3 | -3727.0 | -722.7 | -2345.8 | -527.0  | -1357.6 | -723.3 | -2347.1 | -530.3  | -1364.4 |
| c2mpyr-mes-p1 | -45.1 | -20.3 | -1348.9 | -3992.1 | -722.5 | -2345.8 | -605.7  | -1621.9 | -723.0 | -2347.0 | -613.4  | -1637.3 |



|                |       |       |         |         |        |         |         |         |        |         |         |         |
|----------------|-------|-------|---------|---------|--------|---------|---------|---------|--------|---------|---------|---------|
| c2mpyr-mes-p2  | -41.7 | -18.6 | -1348.0 | -3991.1 | -723.2 | -2346.4 | -605.7  | -1622.1 | -723.6 | -2347.5 | -612.9  | -1636.4 |
| c2mpyr-mes-p3  | -40.5 | -18.7 | -1347.2 | -3990.0 | -722.8 | -2346.4 | -605.7  | -1621.9 | -723.2 | -2347.4 | -612.4  | -1635.6 |
| c2mpyr-ntf2-p1 | -53.4 | -33.7 | -2656.4 | -7225.0 | -722.8 | -2345.3 | -1910.5 | -4849.4 | -723.3 | -2346.4 | -1916.6 | -4861.4 |
| c2mpyr-ntf2-p2 | -42.9 | -23.7 | -2652.1 | -7217.5 | -722.5 | -2345.2 | -1910.4 | -4848.5 | -722.9 | -2346.2 | -1916.4 | -4860.5 |
| c2mpyr-ntf2-p3 | -53.5 | -33.0 | -2656.3 | -7224.9 | -722.6 | -2345.4 | -1910.4 | -4849.2 | -723.1 | -2346.6 | -1916.8 | -4861.8 |
| c2mpyr-ntf2-p4 | -51.6 | -32.8 | -2655.5 | -7224.0 | -722.7 | -2345.5 | -1910.4 | -4849.3 | -723.1 | -2346.5 | -1916.3 | -4860.9 |
| c2mpyr-ntf2-p5 | -44.1 | -24.3 | -2652.4 | -7218.1 | -722.4 | -2345.2 | -1910.4 | -4848.4 | -722.8 | -2346.3 | -1916.5 | -4860.6 |
| c2mpyr-ntf2-p6 | -42.2 | -23.1 | -2651.9 | -7217.3 | -722.7 | -2345.4 | -1910.5 | -4848.5 | -723.1 | -2346.4 | -1916.4 | -4860.3 |
| c2mpyr-pf6-p1  | -38.0 | -17.4 | -1658.4 | -4755.2 | -722.7 | -2345.5 | -919.9  | -2387.6 | -723.0 | -2346.4 | -926.3  | -2400.6 |
| c2mpyr-pf6-p2  | -36.3 | -16.5 | -1657.8 | -4754.4 | -722.8 | -2345.6 | -919.9  | -2387.7 | -723.1 | -2346.5 | -926.0  | -2400.1 |
| c2mpyr-pf6-p3  | -35.7 | -16.5 | -1657.3 | -4754.0 | -722.6 | -2345.5 | -919.9  | -2387.6 | -722.9 | -2346.2 | -925.9  | -2399.9 |
| c2mpyr-tos-p1  | -41.2 | -17.6 | -1912.7 | -5473.3 | -722.5 | -2345.8 | -1170.9 | -3105.7 | -723.0 | -2347.0 | -1178.2 | -3120.2 |
| c2mpyr-tos-p2  | -38.0 | -15.9 | -1911.8 | -5472.3 | -723.1 | -2346.3 | -1170.9 | -3105.8 | -723.6 | -2347.5 | -1177.7 | -3119.3 |
| c3mim-bf4-p1   | -37.3 | -15.1 | -1474.4 | -4144.3 | -848.3 | -2533.8 | -611.2  | -1588.1 | -849.1 | -2535.8 | -617.5  | -1601.2 |
| c3mim-bf4-p2   | -36.6 | -15.4 | -1473.9 | -4143.7 | -848.2 | -2533.5 | -611.2  | -1588.1 | -849.0 | -2535.6 | -617.2  | -1600.5 |
| c3mim-br-p1    | -37.9 | -22.6 | -967.9  | -2802.8 | -850.3 | -2544.5 | -101.1  | -237.0  | -850.8 | -2545.8 | -104.6  | -246.9  |
| c3mim-br-p2    | -28.1 | -15.8 | -965.5  | -2798.0 | -850.9 | -2546.5 | -101.1  | -237.0  | -851.2 | -2547.2 | -104.0  | -245.4  |
| c3mim-br-p3    | -30.7 | -17.5 | -966.4  | -2799.0 | -850.6 | -2546.0 | -101.1  | -237.0  | -850.8 | -2546.7 | -104.3  | -246.1  |
| c3mim-br-p4    | -39.3 | -23.5 | -968.5  | -2803.9 | -850.3 | -2544.7 | -101.1  | -237.0  | -850.9 | -2546.0 | -104.8  | -247.2  |
| c3mim-cl-p1    | -34.7 | -16.4 | -962.6  | -2826.4 | -850.2 | -2544.3 | -98.1   | -261.8  | -850.7 | -2545.5 | -102.5  | -273.9  |
| c3mim-cl-p2    | -28.5 | -13.6 | -962.5  | -2824.2 | -851.1 | -2547.2 | -98.1   | -261.8  | -851.4 | -2547.8 | -101.7  | -272.3  |
| c3mim-cl-p3    | -30.5 | -14.3 | -963.0  | -2824.8 | -850.8 | -2546.6 | -98.1   | -261.8  | -851.0 | -2547.2 | -102.2  | -273.1  |
| c3mim-cl-p4    | -35.6 | -16.8 | -962.8  | -2827.1 | -850.1 | -2544.3 | -98.1   | -261.8  | -850.7 | -2545.6 | -102.8  | -274.1  |
| c3mim-dca-p1   | -58.0 | -43.6 | -1408.0 | -3940.5 | -848.2 | -2534.3 | -533.6  | -1374.4 | -849.2 | -2536.8 | -537.1  | -1381.7 |
| c3mim-dca-p2   | -58.8 | -44.1 | -1408.7 | -3941.3 | -848.6 | -2534.8 | -533.7  | -1374.2 | -849.7 | -2537.5 | -537.2  | -1381.5 |
| c3mim-dca-p3   | -51.5 | -37.9 | -1405.9 | -3937.7 | -848.7 | -2535.7 | -533.5  | -1374.3 | -849.4 | -2537.5 | -536.8  | -1382.0 |
| c3mim-dca-p4   | -60.4 | -44.9 | -1409.6 | -3941.3 | -848.4 | -2534.4 | -533.7  | -1374.0 | -849.4 | -2537.0 | -537.5  | -1382.0 |
| c3mim-dca-p5   | -56.6 | -42.4 | -1406.7 | -3939.0 | -847.8 | -2533.7 | -533.6  | -1374.1 | -848.9 | -2536.3 | -537.0  | -1381.2 |
| c3mim-dca-p6   | -55.6 | -41.4 | -1406.4 | -3938.6 | -847.9 | -2533.6 | -533.8  | -1374.1 | -848.9 | -2536.3 | -537.1  | -1381.3 |
| c3mim-mes-p1   | -51.8 | -23.7 | -1477.7 | -4183.8 | -849.0 | -2535.1 | -605.5  | -1620.2 | -849.8 | -2537.2 | -613.9  | -1636.9 |
| c3mim-mes-p2   | -45.3 | -20.0 | -1473.5 | -4179.2 | -848.0 | -2533.5 | -605.6  | -1620.3 | -848.8 | -2535.6 | -613.1  | -1635.3 |
| c3mim-ntf2-p1  | -78.4 | -50.0 | -2793.7 | -7427.7 | -848.3 | -2534.0 | -1911.4 | -4849.2 | -849.4 | -2536.6 | -1919.8 | -4865.6 |
| c3mim-ntf2-p2  | -57.6 | -34.4 | -2785.7 | -7415.8 | -848.6 | -2535.8 | -1911.1 | -4848.3 | -849.2 | -2537.3 | -1918.1 | -4862.6 |
| c3mim-ntf2-p3  | -46.6 | -23.7 | -2781.1 | -7407.9 | -848.2 | -2534.6 | -1911.3 | -4848.2 | -848.8 | -2536.4 | -1918.1 | -4861.9 |
| c3mim-ntf2-p4  | -66.4 | -42.8 | -2788.1 | -7420.8 | -847.9 | -2533.3 | -1911.7 | -4849.6 | -848.8 | -2535.6 | -1918.5 | -4863.2 |
| c3mim-pf6-p1   | -41.8 | -18.6 | -1784.3 | -4945.7 | -848.0 | -2533.5 | -919.7  | -2387.0 | -848.7 | -2535.2 | -926.7  | -2400.9 |
| c3mim-pf6-p2   | -37.4 | -16.4 | -1782.2 | -4942.8 | -847.7 | -2532.8 | -919.8  | -2387.2 | -848.2 | -2534.5 | -926.1  | -2399.8 |
| c3mim-tos-p1   | -50.0 | -22.4 | -2042.8 | -5666.6 | -848.8 | -2534.9 | -1171.3 | -3104.4 | -849.7 | -2537.2 | -1179.5 | -3120.5 |
| c3mim-tos-p2   | -47.2 | -21.2 | -2040.9 | -5664.3 | -848.3 | -2533.8 | -1171.3 | -3104.6 | -849.1 | -2536.1 | -1179.0 | -3119.7 |



|                |       |       |         |         |        |         |         |         |        |         |         |         |
|----------------|-------|-------|---------|---------|--------|---------|---------|---------|--------|---------|---------|---------|
| c3mpyr-bf4-p1  | -37.7 | -17.1 | -1437.8 | -4242.9 | -811.2 | -2634.2 | -610.9  | -1586.7 | -811.7 | -2635.3 | -617.0  | -1599.7 |
| c3mpyr-bf4-p2  | -35.7 | -16.3 | -1437.4 | -4242.1 | -811.6 | -2634.5 | -610.9  | -1586.7 | -812.0 | -2635.6 | -616.6  | -1599.0 |
| c3mpyr-bf4-p3  | -34.7 | -16.4 | -1436.7 | -4241.3 | -811.3 | -2634.4 | -610.9  | -1586.7 | -811.7 | -2635.4 | -616.3  | -1598.3 |
| c3mpyr-br-p1   | -41.0 | -27.6 | -931.4  | -2895.0 | -811.9 | -2635.4 | -101.1  | -237.0  | -812.1 | -2635.9 | -104.4  | -246.3  |
| c3mpyr-br-p2   | -38.8 | -26.2 | -930.2  | -2893.9 | -811.7 | -2635.5 | -101.1  | -237.0  | -812.0 | -2636.1 | -104.2  | -245.7  |
| c3mpyr-br-p3   | -39.0 | -26.4 | -930.3  | -2894.1 | -811.8 | -2635.6 | -101.1  | -237.0  | -812.0 | -2636.1 | -104.2  | -245.7  |
| c3mpyr-cl-p1   | -38.4 | -22.8 | -926.5  | -2919.2 | -811.9 | -2635.5 | -98.1   | -261.8  | -812.1 | -2636.0 | -102.1  | -272.7  |
| c3mpyr-cl-p2   | -37.4 | -22.5 | -926.0  | -2918.8 | -811.7 | -2635.7 | -98.1   | -261.8  | -811.9 | -2636.2 | -101.9  | -272.3  |
| c3mpyr-cl-p3   | -37.0 | -22.3 | -925.9  | -2918.6 | -811.9 | -2635.7 | -98.1   | -261.8  | -812.1 | -2636.2 | -101.8  | -272.1  |
| c3mpyr-dca-p1  | -41.2 | -29.4 | -1358.3 | -4013.7 | -811.5 | -2634.6 | -527.1  | -1357.5 | -811.9 | -2635.8 | -530.4  | -1364.5 |
| c3mpyr-dca-p2  | -43.1 | -31.3 | -1358.8 | -4014.9 | -811.3 | -2634.6 | -527.1  | -1357.7 | -811.9 | -2635.9 | -530.3  | -1364.3 |
| c3mpyr-dca-p3  | -39.6 | -28.7 | -1356.0 | -4015.7 | -811.5 | -2634.6 | -527.3  | -1358.7 | -811.9 | -2635.8 | -530.0  | -1365.2 |
| c3mpyr-dca-p4  | -41.7 | -30.6 | -1358.1 | -4014.5 | -811.6 | -2634.7 | -527.0  | -1357.6 | -812.1 | -2635.9 | -530.0  | -1363.9 |
| c3mpyr-dca-p5  | -44.1 | -32.1 | -1359.0 | -4015.7 | -811.4 | -2634.6 | -527.0  | -1357.6 | -812.0 | -2635.9 | -530.3  | -1364.4 |
| c3mpyr-mes-p1  | -46.0 | -20.7 | -1437.9 | -4281.5 | -811.2 | -2634.5 | -605.7  | -1621.9 | -811.7 | -2635.7 | -613.6  | -1637.6 |
| c3mpyr-mes-p2  | -42.2 | -18.8 | -1436.8 | -4280.0 | -811.8 | -2635.1 | -605.7  | -1622.1 | -812.3 | -2636.2 | -613.0  | -1636.6 |
| c3mpyr-mes-p3  | -41.4 | -19.0 | -1436.3 | -4279.4 | -811.4 | -2635.1 | -605.7  | -1621.9 | -811.9 | -2636.2 | -612.5  | -1635.9 |
| c3mpyr-ntf2-p1 | -55.9 | -34.9 | -2746.2 | -7515.4 | -811.6 | -2634.3 | -1910.4 | -4849.4 | -812.1 | -2635.5 | -1916.9 | -4862.3 |
| c3mpyr-ntf2-p2 | -41.5 | -23.4 | -2740.5 | -7505.1 | -811.3 | -2634.1 | -1910.4 | -4848.4 | -811.7 | -2635.0 | -1915.9 | -4859.6 |
| c3mpyr-ntf2-p3 | -53.5 | -33.2 | -2745.0 | -7513.6 | -811.2 | -2634.1 | -1910.5 | -4849.3 | -811.7 | -2635.2 | -1916.8 | -4861.8 |
| c3mpyr-ntf2-p4 | -53.8 | -33.9 | -2745.2 | -7513.8 | -811.4 | -2634.3 | -1910.4 | -4849.2 | -811.8 | -2635.3 | -1916.6 | -4861.5 |
| c3mpyr-ntf2-p5 | -44.3 | -24.4 | -2741.1 | -7506.9 | -811.1 | -2633.9 | -1910.4 | -4848.3 | -811.5 | -2635.0 | -1916.5 | -4860.6 |
| c3mpyr-ntf2-p6 | -44.2 | -24.0 | -2741.4 | -7507.3 | -811.4 | -2634.2 | -1910.5 | -4848.4 | -811.8 | -2635.2 | -1916.7 | -4861.0 |
| c3mpyr-pf6-p1  | -39.2 | -17.8 | -1747.3 | -5044.5 | -811.1 | -2634.0 | -919.9  | -2387.6 | -811.5 | -2634.9 | -926.5  | -2401.1 |
| c3mpyr-pf6-p2  | -36.3 | -16.5 | -1746.4 | -5043.1 | -811.4 | -2634.3 | -919.9  | -2387.6 | -811.8 | -2635.1 | -926.0  | -2400.1 |
| c3mpyr-pf6-p3  | -36.2 | -16.7 | -1746.1 | -5043.1 | -811.3 | -2634.2 | -919.9  | -2387.6 | -811.6 | -2635.0 | -925.9  | -2400.0 |
| c3mpyr-tos-p1  | -42.3 | -18.1 | -2001.8 | -5762.7 | -811.2 | -2634.5 | -1170.8 | -3105.6 | -811.7 | -2635.8 | -1178.4 | -3120.5 |
| c3mpyr-tos-p2  | -38.5 | -16.2 | -2000.6 | -5761.2 | -811.8 | -2635.0 | -1170.8 | -3105.7 | -812.3 | -2636.2 | -1177.7 | -3119.4 |
| c4mim-bf4-p1   | -37.9 | -15.3 | -1563.0 | -4432.4 | -936.7 | -2821.5 | -611.2  | -1588.1 | -937.5 | -2823.6 | -617.6  | -1601.4 |
| c4mim-bf4-p2   | -36.8 | -15.5 | -1562.3 | -4431.4 | -936.5 | -2821.0 | -611.2  | -1588.1 | -937.3 | -2823.1 | -617.2  | -1600.6 |
| c4mim-br-p1    | -38.6 | -23.1 | -1056.7 | -3091.9 | -938.7 | -2833.1 | -101.1  | -237.0  | -939.3 | -2834.4 | -104.7  | -247.1  |
| c4mim-br-p2    | -29.0 | -16.3 | -1054.4 | -3087.1 | -939.4 | -2835.1 | -101.1  | -237.0  | -939.7 | -2835.8 | -104.1  | -245.7  |
| c4mim-br-p3    | -32.1 | -18.4 | -1055.5 | -3088.4 | -939.1 | -2834.6 | -101.1  | -237.0  | -939.3 | -2835.3 | -104.5  | -246.4  |
| c4mim-br-p4    | -39.8 | -23.8 | -1057.0 | -3092.6 | -938.7 | -2833.0 | -101.1  | -237.0  | -939.2 | -2834.3 | -104.9  | -247.3  |
| c4mim-cl-p1    | -35.3 | -16.8 | -1051.3 | -3115.3 | -938.6 | -2832.9 | -98.1   | -261.8  | -939.1 | -2834.1 | -102.6  | -274.0  |
| c4mim-cl-p2    | -29.1 | -13.8 | -1051.2 | -3113.2 | -939.6 | -2835.7 | -98.1   | -261.8  | -939.9 | -2836.4 | -101.8  | -272.5  |
| c4mim-cl-p3    | -31.5 | -14.8 | -1051.8 | -3113.9 | -939.2 | -2835.1 | -98.1   | -261.8  | -939.5 | -2835.7 | -102.3  | -273.4  |
| c4mim-cl-p4    | -36.0 | -17.0 | -1051.3 | -3115.7 | -938.5 | -2832.6 | -98.1   | -261.8  | -939.0 | -2833.9 | -102.8  | -274.3  |
| c4mim-dca-p1   | -58.7 | -44.1 | -1496.8 | -4228.6 | -936.6 | -2822.0 | -533.6  | -1374.4 | -937.7 | -2824.6 | -537.1  | -1381.8 |



|                |       |       |         |         |        |         |         |         |        |         |         |         |
|----------------|-------|-------|---------|---------|--------|---------|---------|---------|--------|---------|---------|---------|
| c4mim-dca-p2   | -61.8 | -46.0 | -1498.7 | -4229.9 | -936.8 | -2822.2 | -533.7  | -1374.1 | -937.9 | -2824.8 | -537.6  | -1382.3 |
| c4mim-dca-p3   | -56.9 | -42.6 | -1495.2 | -4226.9 | -936.2 | -2821.2 | -533.6  | -1374.1 | -937.2 | -2823.9 | -537.0  | -1381.3 |
| c4mim-mes-p1   | -53.0 | -24.4 | -1566.7 | -4472.2 | -937.4 | -2822.8 | -605.5  | -1620.2 | -938.3 | -2824.9 | -614.0  | -1637.2 |
| c4mim-mes-p2   | -45.4 | -20.0 | -1561.9 | -4466.8 | -936.3 | -2821.0 | -605.6  | -1620.4 | -937.1 | -2823.1 | -613.1  | -1635.4 |
| c4mim-pf6-p1   | -44.2 | -18.4 | -1874.3 | -5235.2 | -936.7 | -2821.6 | -919.8  | -2387.2 | -937.3 | -2823.4 | -927.6  | -2402.7 |
| c4mim-pf6-p2   | -37.5 | -16.4 | -1870.5 | -5230.4 | -936.0 | -2820.4 | -919.8  | -2387.2 | -936.6 | -2822.0 | -926.1  | -2399.8 |
| c4mim-tos-p1   | -52.1 | -23.8 | -2132.2 | -5955.6 | -937.3 | -2822.7 | -1171.3 | -3104.4 | -938.3 | -2825.1 | -1179.7 | -3121.0 |
| c4mim-tos-p2   | -48.2 | -22.4 | -2130.3 | -5952.9 | -937.1 | -2822.1 | -1171.3 | -3104.4 | -938.1 | -2824.5 | -1178.9 | -3119.3 |
| c4mpyr-bf4-p1  | -37.8 | -17.1 | -1526.2 | -4531.1 | -899.6 | -2922.3 | -610.9  | -1586.7 | -900.0 | -2923.4 | -617.0  | -1599.8 |
| c4mpyr-bf4-p2  | -35.8 | -16.4 | -1525.7 | -4530.4 | -899.9 | -2922.7 | -610.9  | -1586.7 | -900.4 | -2923.8 | -616.6  | -1599.0 |
| c4mpyr-bf4-p3  | -34.9 | -16.5 | -1525.2 | -4529.7 | -899.7 | -2922.6 | -610.9  | -1586.7 | -900.1 | -2923.6 | -616.3  | -1598.4 |
| c4mpyr-br-p1   | -41.2 | -27.7 | -1019.8 | -3183.3 | -900.2 | -2923.5 | -101.1  | -237.0  | -900.5 | -2924.1 | -104.5  | -246.3  |
| c4mpyr-br-p2   | -39.0 | -26.3 | -1018.6 | -3182.3 | -900.1 | -2923.7 | -101.1  | -237.0  | -900.3 | -2924.2 | -104.3  | -245.7  |
| c4mpyr-br-p3   | -39.2 | -26.5 | -1018.8 | -3182.4 | -900.2 | -2923.7 | -101.1  | -237.0  | -900.4 | -2924.2 | -104.2  | -245.8  |
| c4mpyr-cl-p1   | -38.4 | -22.8 | -1014.9 | -3207.3 | -900.2 | -2923.6 | -98.1   | -261.8  | -900.5 | -2924.1 | -102.1  | -272.7  |
| c4mpyr-cl-p2   | -38.0 | -22.8 | -1014.5 | -3207.4 | -900.0 | -2924.0 | -98.1   | -261.8  | -900.3 | -2924.5 | -101.9  | -272.5  |
| c4mpyr-cl-p3   | -36.9 | -22.2 | -1014.2 | -3206.7 | -900.2 | -2923.8 | -98.1   | -261.8  | -900.4 | -2924.3 | -101.8  | -272.1  |
| c4mpyr-dca-p1  | -41.3 | -30.6 | -1445.7 | -4302.6 | -899.8 | -2922.4 | -527.0  | -1357.8 | -900.3 | -2923.7 | -529.9  | -1363.8 |
| c4mpyr-dca-p2  | -43.2 | -31.4 | -1447.2 | -4303.2 | -899.7 | -2922.8 | -527.1  | -1357.7 | -900.3 | -2924.1 | -530.3  | -1364.4 |
| c4mpyr-dca-p3  | -41.9 | -29.8 | -1446.7 | -4302.2 | -899.8 | -2922.7 | -527.1  | -1357.5 | -900.2 | -2923.8 | -530.5  | -1364.6 |
| c4mpyr-dca-p4  | -42.8 | -31.4 | -1446.7 | -4303.3 | -899.7 | -2922.7 | -527.0  | -1357.7 | -900.3 | -2924.0 | -530.1  | -1364.0 |
| c4mpyr-dca-p5  | -44.2 | -32.3 | -1447.4 | -4304.0 | -899.8 | -2922.7 | -527.0  | -1357.7 | -900.3 | -2924.0 | -530.3  | -1364.5 |
| c4mpyr-mes-p1  | -46.1 | -20.8 | -1526.2 | -4569.7 | -899.6 | -2922.7 | -605.7  | -1621.9 | -900.1 | -2923.8 | -613.6  | -1637.6 |
| c4mpyr-mes-p2  | -42.6 | -19.1 | -1525.3 | -4568.5 | -900.2 | -2923.3 | -605.7  | -1622.1 | -900.7 | -2924.4 | -613.0  | -1636.6 |
| c4mpyr-mes-p3  | -41.7 | -19.2 | -1524.7 | -4567.7 | -899.8 | -2923.3 | -605.7  | -1621.9 | -900.3 | -2924.4 | -612.6  | -1636.0 |
| c4mpyr-ntf2-p1 | -56.0 | -35.1 | -2834.6 | -7803.4 | -899.9 | -2922.4 | -1910.4 | -4849.3 | -900.4 | -2923.6 | -1916.9 | -4862.0 |
| c4mpyr-ntf2-p2 | -47.0 | -26.4 | -2830.8 | -7796.3 | -899.6 | -2922.1 | -1910.3 | -4848.1 | -900.0 | -2923.2 | -1916.7 | -4860.7 |
| c4mpyr-ntf2-p3 | -54.7 | -33.9 | -2833.9 | -7802.5 | -899.6 | -2922.4 | -1910.5 | -4849.3 | -900.1 | -2923.5 | -1916.9 | -4862.1 |
| c4mpyr-ntf2-p4 | -54.8 | -34.6 | -2834.0 | -7802.6 | -899.7 | -2922.4 | -1910.4 | -4849.3 | -900.2 | -2923.5 | -1916.7 | -4861.7 |
| c4mpyr-ntf2-p5 | -44.7 | -24.8 | -2829.6 | -7795.3 | -899.4 | -2922.1 | -1910.4 | -4848.3 | -899.8 | -2923.2 | -1916.5 | -4860.6 |
| c4mpyr-ntf2-p6 | -45.4 | -24.9 | -2830.3 | -7796.1 | -899.8 | -2922.4 | -1910.5 | -4848.4 | -900.2 | -2923.4 | -1916.8 | -4861.1 |
| c4mpyr-pf6-p1  | -39.3 | -17.8 | -1835.7 | -5332.8 | -899.5 | -2922.2 | -919.9  | -2387.6 | -899.9 | -2923.1 | -926.6  | -2401.2 |
| c4mpyr-pf6-p2  | -36.6 | -16.7 | -1834.9 | -5331.5 | -899.8 | -2922.5 | -919.9  | -2387.6 | -900.2 | -2923.3 | -926.0  | -2400.2 |
| c4mpyr-pf6-p3  | -36.4 | -16.7 | -1834.6 | -5331.4 | -899.7 | -2922.4 | -919.9  | -2387.6 | -900.0 | -2923.2 | -926.0  | -2400.1 |
| c4mpyr-tos-p1  | -42.6 | -18.3 | -2090.3 | -6051.1 | -899.6 | -2922.7 | -1170.8 | -3105.7 | -900.1 | -2924.0 | -1178.4 | -3120.6 |
| c4mpyr-tos-p2  | -39.1 | -16.7 | -2089.4 | -6049.9 | -900.2 | -2923.2 | -1170.9 | -3105.8 | -900.7 | -2924.4 | -1177.9 | -3119.6 |



## 2.2.16 ACC(D+d) basis set

Table S 17: Raw ACC(D+d) energies. Superscript \* indicates monomer calculated in the dimer basis set.

| ion pair       | E(int) | E(int) CP | E(dimer) SS | E(dimer) OS | E(A) SS | E(A) OS | E(B) SS | E(B) OS | E(A) SS* | E(A) OS* | E(B) SS* | E(B) OS* |
|----------------|--------|-----------|-------------|-------------|---------|---------|---------|---------|----------|----------|----------|----------|
| clmim-bf4-p1   | -38.5  | -26.5     | -1384.3     | -3793.0     | -695.3  | -2030.6 | -673.1  | -1739.7 | -696.3   | -2034.6  | -674.5   | -1745.4  |
| clmim-br-p1    | -54.2  | -35.8     | -835.8      | -2344.6     | -697.8  | -2040.6 | -114.2  | -273.7  | -698.2   | -2042.4  | -118.4   | -285.6   |
| clmim-br-p2    | -33.6  | -18.5     | -827.9      | -2332.9     | -697.7  | -2041.6 | -114.2  | -273.7  | -698.0   | -2042.6  | -117.7   | -284.0   |
| clmim-cl-p1    | -40.7  | -29.1     | -832.4      | -2373.8     | -697.6  | -2040.3 | -116.6  | -311.0  | -698.1   | -2042.2  | -118.2   | -318.6   |
| clmim-cl-p2    | -24.9  | -15.8     | -827.7      | -2365.1     | -698.0  | -2042.3 | -116.6  | -311.0  | -698.3   | -2043.3  | -117.9   | -317.5   |
| clmim-dca-p1   | -69.1  | -54.0     | -1284.4     | -3514.3     | -695.9  | -2032.2 | -558.5  | -1443.1 | -697.0   | -2036.8  | -560.3   | -1450.5  |
| clmim-dca-p2   | -49.2  | -36.5     | -1276.5     | -3504.1     | -696.1  | -2033.8 | -558.2  | -1443.2 | -696.9   | -2037.0  | -559.9   | -1450.3  |
| clmim-mes-p1   | -51.3  | -35.3     | -1382.8     | -3819.3     | -695.7  | -2031.5 | -664.3  | -1759.2 | -696.9   | -2036.0  | -666.5   | -1767.4  |
| clmim-ntf2-p1  | -87.3  | -62.5     | -2810.5     | -7321.3     | -695.3  | -2030.8 | -2079.1 | -5239.2 | -697.1   | -2038.0  | -2082.5  | -5251.6  |
| clmim-ntf2-p2  | -48.6  | -30.5     | -2795.3     | -7298.2     | -695.9  | -2033.4 | -2078.3 | -5237.4 | -696.8   | -2037.3  | -2081.1  | -5247.7  |
| clmim-ntf2-p3  | -53.7  | -34.3     | -2797.9     | -7300.8     | -695.5  | -2031.9 | -2079.1 | -5238.4 | -696.8   | -2037.3  | -2081.8  | -5248.5  |
| clmim-pf6-p1   | -42.1  | -28.8     | -1740.7     | -4689.6     | -695.3  | -2030.8 | -1028.1 | -2634.1 | -696.3   | -2034.8  | -1029.7  | -2640.6  |
| clmim-tos-p1   | -51.5  | -34.1     | -1966.7     | -5357.1     | -695.4  | -2031.2 | -1248.8 | -3296.8 | -696.8   | -2036.3  | -1251.1  | -3305.5  |
| clmpyr-bf4-p1  | -37.1  | -25.4     | -1346.3     | -3890.0     | -657.7  | -2131.0 | -672.6  | -1737.8 | -658.5   | -2134.4  | -674.0   | -1743.9  |
| clmpyr-bf4-p2  | -33.5  | -22.9     | -1344.8     | -3888.2     | -657.8  | -2131.3 | -672.6  | -1737.8 | -658.5   | -2134.1  | -673.9   | -1743.6  |
| clmpyr-br-p1   | -53.9  | -35.7     | -796.3      | -2436.2     | -658.4  | -2132.3 | -114.2  | -273.7  | -658.7   | -2133.6  | -118.5   | -286.0   |
| clmpyr-br-p2   | -50.3  | -33.4     | -794.9      | -2434.4     | -658.4  | -2132.7 | -114.2  | -273.7  | -658.7   | -2133.7  | -118.2   | -285.2   |
| clmpyr-cl-p1   | -41.7  | -30.9     | -793.9      | -2466.3     | -658.4  | -2132.4 | -116.6  | -311.0  | -658.7   | -2133.7  | -118.1   | -318.7   |
| clmpyr-cl-p2   | -39.5  | -29.5     | -793.1      | -2465.2     | -658.4  | -2132.7 | -116.6  | -311.0  | -658.7   | -2133.8  | -118.1   | -318.2   |
| clmpyr-dca-p1  | -47.8  | -36.0     | -1231.6     | -3584.5     | -658.2  | -2131.9 | -551.7  | -1426.4 | -659.1   | -2135.2  | -553.2   | -1432.7  |
| clmpyr-dca-p2  | -52.8  | -39.5     | -1232.9     | -3588.1     | -658.0  | -2131.6 | -551.7  | -1426.8 | -658.9   | -2135.0  | -553.5   | -1434.1  |
| clmpyr-dca-p3  | -50.0  | -37.1     | -1230.5     | -3588.3     | -657.8  | -2131.4 | -551.9  | -1427.8 | -658.7   | -2134.8  | -553.6   | -1434.7  |
| clmpyr-dca-p4  | -51.1  | -37.8     | -1231.9     | -3586.9     | -657.8  | -2131.4 | -551.7  | -1426.8 | -658.7   | -2134.8  | -553.5   | -1434.0  |
| clmpyr-mes-p1  | -46.0  | -30.2     | -1343.2     | -3917.5     | -657.7  | -2131.5 | -664.5  | -1760.9 | -658.7   | -2135.2  | -666.8   | -1769.8  |
| clmpyr-mes-p2  | -39.7  | -25.4     | -1340.8     | -3914.4     | -658.0  | -2132.1 | -664.5  | -1760.9 | -658.7   | -2135.1  | -666.6   | -1769.2  |
| clmpyr-ntf2-p1 | -61.5  | -41.6     | -2760.9     | -7406.3     | -658.0  | -2131.0 | -2077.7 | -5239.0 | -659.2   | -2135.8  | -2080.8  | -5249.8  |
| clmpyr-ntf2-p2 | -48.9  | -30.9     | -2755.9     | -7397.4     | -657.7  | -2130.8 | -2077.7 | -5238.1 | -658.9   | -2135.2  | -2080.4  | -5247.9  |
| clmpyr-ntf2-p3 | -59.0  | -39.8     | -2759.9     | -7404.7     | -658.0  | -2131.3 | -2077.6 | -5238.7 | -659.1   | -2135.7  | -2080.6  | -5249.4  |
| clmpyr-ntf2-p5 | -49.5  | -31.9     | -2756.4     | -7397.5     | -657.9  | -2131.1 | -2077.6 | -5237.8 | -659.0   | -2135.2  | -2080.3  | -5247.5  |
| clmpyr-pf6-p1  | -38.7  | -26.0     | -1702.3     | -4787.8     | -657.7  | -2131.0 | -1028.2 | -2634.5 | -658.5   | -2134.2  | -1030.0  | -2641.4  |
| clmpyr-pf6-p2  | -35.1  | -23.5     | -1700.9     | -4786.1     | -657.8  | -2131.1 | -1028.2 | -2634.7 | -658.5   | -2133.9  | -1029.9  | -2641.1  |
| clmpyr-tos-p1  | -45.7  | -28.5     | -1926.9     | -5454.9     | -657.7  | -2131.5 | -1248.6 | -3298.3 | -658.8   | -2135.7  | -1251.1  | -3307.7  |
| clmpyr-tos-p2  | -39.4  | -24.1     | -1924.0     | -5451.7     | -657.9  | -2131.7 | -1248.5 | -3298.3 | -658.7   | -2135.2  | -1250.8  | -3306.9  |



|               |       |       |         |         |        |         |         |         |        |         |         |         |
|---------------|-------|-------|---------|---------|--------|---------|---------|---------|--------|---------|---------|---------|
| c2mim-bf4-p1  | -41.1 | -27.9 | -1479.3 | -4094.3 | -789.1 | -2330.7 | -673.1  | -1739.7 | -790.2 | -2334.9 | -674.6  | -1746.0 |
| c2mim-bf4-p2  | -38.4 | -26.0 | -1477.6 | -4092.4 | -788.7 | -2330.1 | -673.1  | -1739.7 | -789.8 | -2334.2 | -674.5  | -1745.6 |
| c2mim-br-p1   | -56.2 | -36.8 | -930.0  | -2645.9 | -791.2 | -2340.6 | -114.2  | -273.7  | -791.7 | -2342.3 | -118.7  | -286.4  |
| c2mim-br-p2   | -39.2 | -22.0 | -924.7  | -2637.9 | -792.3 | -2343.3 | -114.2  | -273.7  | -792.6 | -2344.4 | -118.2  | -285.4  |
| c2mim-br-p3   | -39.0 | -22.5 | -924.0  | -2636.7 | -791.6 | -2342.4 | -114.2  | -273.7  | -791.9 | -2343.5 | -118.1  | -284.8  |
| c2mim-br-p4   | -56.3 | -37.2 | -930.6  | -2646.7 | -791.7 | -2341.4 | -114.2  | -273.7  | -792.2 | -2343.2 | -118.6  | -286.0  |
| c2mim-cl-p1   | -42.6 | -30.5 | -926.7  | -2675.1 | -791.2 | -2340.5 | -116.6  | -311.0  | -791.7 | -2342.3 | -118.3  | -319.1  |
| c2mim-cl-p2   | -28.6 | -18.4 | -923.7  | -2669.0 | -792.5 | -2344.0 | -116.6  | -311.0  | -792.8 | -2345.1 | -118.1  | -318.3  |
| c2mim-cl-p3   | -28.9 | -19.2 | -923.1  | -2668.3 | -791.8 | -2343.0 | -116.6  | -311.0  | -792.1 | -2344.1 | -118.0  | -318.0  |
| c2mim-cl-p4   | -42.2 | -30.2 | -926.8  | -2675.5 | -791.5 | -2341.0 | -116.6  | -311.0  | -792.0 | -2342.9 | -118.2  | -318.8  |
| c2mim-dca-p1  | -71.7 | -55.1 | -1378.4 | -3815.7 | -789.1 | -2331.4 | -558.4  | -1443.5 | -790.4 | -2336.4 | -560.4  | -1451.8 |
| c2mim-dca-p2  | -67.0 | -51.6 | -1376.9 | -3812.5 | -789.3 | -2331.4 | -558.5  | -1443.3 | -790.4 | -2335.9 | -560.3  | -1451.1 |
| c2mim-dca-p3  | -71.7 | -55.5 | -1379.3 | -3815.7 | -789.7 | -2331.8 | -558.6  | -1443.2 | -790.9 | -2336.6 | -560.5  | -1451.4 |
| c2mim-dca-p4  | -68.3 | -52.7 | -1377.2 | -3813.3 | -789.2 | -2331.3 | -558.5  | -1443.2 | -790.4 | -2336.1 | -560.3  | -1451.0 |
| c2mim-dca-p5  | -70.1 | -54.2 | -1378.0 | -3814.4 | -789.2 | -2331.5 | -558.6  | -1443.1 | -790.5 | -2336.4 | -560.4  | -1451.0 |
| c2mim-dca-p6  | -70.3 | -54.6 | -1377.7 | -3814.4 | -789.0 | -2330.9 | -558.6  | -1443.2 | -790.3 | -2335.9 | -560.4  | -1450.9 |
| c2mim-mes-p1  | -57.8 | -40.0 | -1479.7 | -4123.2 | -789.9 | -2331.9 | -664.3  | -1759.0 | -791.1 | -2336.7 | -666.7  | -1768.4 |
| c2mim-mes-p2  | -52.8 | -35.9 | -1476.5 | -4119.6 | -789.1 | -2330.7 | -664.4  | -1759.2 | -790.3 | -2335.5 | -666.6  | -1767.9 |
| c2mim-ntf2-p1 | -96.3 | -67.9 | -2907.9 | -7626.6 | -789.2 | -2330.9 | -2079.1 | -5239.2 | -791.2 | -2338.7 | -2083.1 | -5253.6 |
| c2mim-ntf2-p2 | -61.5 | -39.9 | -2894.6 | -7606.7 | -789.7 | -2333.1 | -2078.6 | -5238.4 | -790.8 | -2338.0 | -2082.0 | -5250.6 |
| c2mim-ntf2-p3 | -58.1 | -36.9 | -2893.4 | -7602.9 | -789.1 | -2331.7 | -2079.1 | -5238.3 | -790.5 | -2337.3 | -2082.1 | -5249.6 |
| c2mim-ntf2-p4 | -84.2 | -59.2 | -2903.5 | -7619.7 | -789.2 | -2331.0 | -2079.3 | -5239.4 | -791.0 | -2338.0 | -2082.8 | -5252.1 |
| c2mim-pf6-p1  | -46.8 | -31.8 | -1836.5 | -4992.1 | -789.0 | -2330.7 | -1028.0 | -2634.1 | -790.2 | -2335.1 | -1030.0 | -2641.6 |
| c2mim-pf6-p2  | -43.1 | -29.1 | -1834.3 | -4989.6 | -788.7 | -2330.0 | -1028.1 | -2634.1 | -789.8 | -2334.3 | -1029.8 | -2640.9 |
| c2mim-tos-p1  | -59.7 | -40.0 | -2064.5 | -5662.0 | -789.7 | -2331.7 | -1248.8 | -3296.6 | -791.1 | -2337.2 | -1251.4 | -3306.7 |
| c2mim-tos-p2  | -53.4 | -34.8 | -2061.0 | -5657.8 | -789.1 | -2330.8 | -1248.8 | -3296.8 | -790.4 | -2336.2 | -1251.3 | -3306.1 |
| c2mpyr-bf4-p1 | -38.6 | -26.0 | -1442.5 | -4194.6 | -753.5 | -2434.6 | -672.6  | -1737.8 | -754.4 | -2438.3 | -674.1  | -1744.3 |
| c2mpyr-bf4-p2 | -35.6 | -24.2 | -1441.8 | -4193.3 | -753.9 | -2435.1 | -672.6  | -1737.9 | -754.7 | -2438.3 | -674.0  | -1743.9 |
| c2mpyr-bf4-p3 | -35.0 | -23.6 | -1441.1 | -4192.8 | -753.6 | -2434.9 | -672.6  | -1737.8 | -754.3 | -2438.0 | -674.0  | -1743.9 |
| c2mpyr-br-p1  | -56.1 | -36.8 | -892.8  | -2741.0 | -754.1 | -2435.8 | -114.2  | -273.7  | -754.5 | -2437.2 | -118.7  | -286.7  |
| c2mpyr-br-p2  | -53.9 | -35.2 | -891.9  | -2740.4 | -754.1 | -2436.5 | -114.2  | -273.7  | -754.4 | -2437.7 | -118.6  | -286.5  |
| c2mpyr-br-p3  | -52.5 | -34.4 | -891.2  | -2739.1 | -754.0 | -2436.0 | -114.2  | -273.7  | -754.3 | -2437.1 | -118.4  | -286.0  |
| c2mpyr-cl-p1  | -43.3 | -31.7 | -890.1  | -2770.8 | -754.2 | -2435.8 | -116.6  | -311.0  | -754.5 | -2437.3 | -118.3  | -319.1  |
| c2mpyr-cl-p2  | -41.5 | -30.6 | -889.3  | -2770.1 | -753.9 | -2436.3 | -116.6  | -311.0  | -754.3 | -2437.5 | -118.2  | -318.8  |
| c2mpyr-cl-p3  | -40.7 | -30.0 | -889.1  | -2769.4 | -754.2 | -2436.1 | -116.6  | -311.0  | -754.5 | -2437.3 | -118.1  | -318.6  |
| c2mpyr-dca-p1 | -48.8 | -36.2 | -1327.5 | -3888.7 | -753.9 | -2435.3 | -551.7  | -1426.4 | -754.9 | -2438.8 | -553.3  | -1433.1 |
| c2mpyr-dca-p2 | -53.1 | -39.4 | -1328.8 | -3891.7 | -753.6 | -2435.1 | -551.8  | -1426.8 | -754.5 | -2438.7 | -553.5  | -1434.3 |
| c2mpyr-dca-p3 | -54.1 | -40.0 | -1328.9 | -3892.4 | -753.7 | -2435.0 | -551.7  | -1426.8 | -754.6 | -2438.7 | -553.6  | -1434.4 |
| c2mpyr-mes-p1 | -48.7 | -31.5 | -1439.8 | -4222.9 | -753.5 | -2435.1 | -664.5  | -1760.9 | -754.6 | -2439.2 | -667.0  | -1770.4 |



|                |        |       |         |         |        |         |         |         |        |         |         |         |
|----------------|--------|-------|---------|---------|--------|---------|---------|---------|--------|---------|---------|---------|
| c2mpyr-mes-p2  | -44.5  | -28.7 | -1438.5 | -4221.2 | -754.1 | -2435.5 | -664.6  | -1761.0 | -755.0 | -2439.2 | -666.8  | -1769.9 |
| c2mpyr-mes-p3  | -42.5  | -26.9 | -1437.4 | -4219.8 | -753.7 | -2435.6 | -664.5  | -1760.9 | -754.6 | -2439.1 | -666.8  | -1769.8 |
| c2mpyr-ntf2-p1 | -64.6  | -43.0 | -2857.8 | -7711.8 | -753.7 | -2434.3 | -2077.9 | -5239.1 | -755.1 | -2439.7 | -2081.1 | -5250.7 |
| c2mpyr-ntf2-p2 | -52.4  | -32.8 | -2852.9 | -7703.3 | -753.4 | -2434.3 | -2077.8 | -5238.3 | -754.7 | -2439.3 | -2080.6 | -5248.7 |
| c2mpyr-ntf2-p3 | -62.3  | -41.6 | -2856.9 | -7710.4 | -753.6 | -2434.6 | -2077.8 | -5239.0 | -754.8 | -2439.5 | -2081.0 | -5250.4 |
| c2mpyr-ntf2-p4 | -60.8  | -40.5 | -2856.2 | -7709.6 | -753.6 | -2434.6 | -2077.8 | -5239.0 | -754.8 | -2439.3 | -2080.9 | -5250.2 |
| c2mpyr-ntf2-p5 | -53.6  | -34.4 | -2853.3 | -7703.6 | -753.3 | -2434.3 | -2077.7 | -5238.1 | -754.5 | -2439.0 | -2080.5 | -5248.6 |
| c2mpyr-ntf2-p6 | -50.3  | -32.2 | -2852.4 | -7702.0 | -753.6 | -2434.6 | -2077.8 | -5238.2 | -754.7 | -2438.9 | -2080.5 | -5248.1 |
| c2mpyr-pf6-p1  | -39.9  | -26.4 | -1798.6 | -5092.3 | -753.6 | -2434.7 | -1028.2 | -2634.5 | -754.6 | -2438.2 | -1030.0 | -2641.7 |
| c2mpyr-pf6-p2  | -37.3  | -24.8 | -1797.6 | -5091.0 | -753.7 | -2434.7 | -1028.2 | -2634.6 | -754.5 | -2437.9 | -1030.0 | -2641.4 |
| c2mpyr-pf6-p3  | -36.7  | -24.1 | -1797.1 | -5090.6 | -753.5 | -2434.6 | -1028.2 | -2634.6 | -754.3 | -2437.8 | -1030.0 | -2641.5 |
| c2mpyr-tos-p1  | -48.6  | -30.0 | -2023.6 | -5760.4 | -753.5 | -2435.0 | -1248.6 | -3298.3 | -754.7 | -2439.7 | -1251.3 | -3308.4 |
| c2mpyr-tos-p2  | -44.5  | -27.4 | -2022.3 | -5758.7 | -754.1 | -2435.4 | -1248.6 | -3298.4 | -755.1 | -2439.6 | -1251.1 | -3307.8 |
| c3mim-bf4-p1   | -42.4  | -28.6 | -1572.3 | -4394.2 | -881.6 | -2629.7 | -673.1  | -1739.7 | -882.7 | -2634.1 | -674.7  | -1746.3 |
| c3mim-bf4-p2   | -41.4  | -28.1 | -1571.8 | -4393.5 | -881.5 | -2629.5 | -673.1  | -1739.7 | -882.6 | -2633.8 | -674.6  | -1746.1 |
| c3mim-br-p1    | -57.6  | -37.4 | -1023.1 | -2946.6 | -883.8 | -2640.5 | -114.2  | -273.7  | -884.3 | -2642.3 | -118.9  | -286.8  |
| c3mim-br-p2    | -40.3  | -22.5 | -1017.4 | -2938.3 | -884.6 | -2643.0 | -114.2  | -273.7  | -884.9 | -2644.2 | -118.3  | -285.8  |
| c3mim-br-p3    | -44.5  | -26.5 | -1019.0 | -2939.8 | -884.3 | -2642.3 | -114.2  | -273.7  | -884.6 | -2643.5 | -118.5  | -285.9  |
| c3mim-br-p4    | -59.2  | -38.6 | -1023.8 | -2947.9 | -883.9 | -2640.8 | -114.2  | -273.7  | -884.5 | -2642.8 | -118.9  | -287.0  |
| c3mim-cl-p1    | -43.4  | -30.9 | -1019.5 | -2975.4 | -883.7 | -2640.3 | -116.6  | -311.0  | -884.2 | -2642.2 | -118.3  | -319.3  |
| c3mim-cl-p2    | -29.2  | -18.7 | -1016.2 | -2969.2 | -884.9 | -2643.7 | -116.6  | -311.0  | -885.2 | -2644.9 | -118.1  | -318.6  |
| c3mim-cl-p3    | -32.8  | -22.3 | -1017.4 | -2970.4 | -884.5 | -2642.8 | -116.6  | -311.0  | -884.8 | -2644.0 | -118.1  | -318.5  |
| c3mim-cl-p4    | -44.1  | -31.2 | -1019.7 | -2976.1 | -883.7 | -2640.4 | -116.6  | -311.0  | -884.3 | -2642.5 | -118.3  | -319.4  |
| c3mim-dca-p1   | -73.5  | -56.1 | -1471.5 | -4115.7 | -881.5 | -2630.1 | -558.4  | -1443.5 | -882.9 | -2635.4 | -560.5  | -1452.3 |
| c3mim-dca-p2   | -74.7  | -57.4 | -1472.4 | -4117.0 | -882.0 | -2630.8 | -558.5  | -1443.3 | -883.3 | -2636.1 | -560.5  | -1452.0 |
| c3mim-dca-p3   | -62.5  | -46.7 | -1467.8 | -4110.4 | -882.1 | -2631.8 | -558.3  | -1443.5 | -883.1 | -2635.9 | -560.4  | -1452.1 |
| c3mim-dca-p4   | -75.9  | -58.5 | -1473.0 | -4116.4 | -881.7 | -2630.2 | -558.5  | -1443.1 | -883.0 | -2635.4 | -560.5  | -1451.9 |
| c3mim-dca-p5   | -72.3  | -55.6 | -1470.3 | -4114.2 | -881.1 | -2629.5 | -558.4  | -1443.2 | -882.5 | -2634.7 | -560.3  | -1451.3 |
| c3mim-dca-p6   | -70.9  | -54.9 | -1469.9 | -4113.4 | -881.2 | -2629.4 | -558.6  | -1443.3 | -882.5 | -2634.4 | -560.4  | -1451.1 |
| c3mim-mes-p1   | -61.2  | -42.0 | -1573.8 | -4424.5 | -882.4 | -2631.2 | -664.3  | -1759.1 | -883.8 | -2636.3 | -666.9  | -1769.2 |
| c3mim-mes-p2   | -53.9  | -36.4 | -1569.0 | -4418.9 | -881.3 | -2629.2 | -664.4  | -1759.2 | -882.5 | -2634.1 | -666.7  | -1768.2 |
| c3mim-ntf2-p1  | -101.4 | -71.0 | -3002.4 | -7928.8 | -881.6 | -2629.8 | -2079.1 | -5239.3 | -883.8 | -2638.3 | -2083.4 | -5254.8 |
| c3mim-ntf2-p2  | -67.3  | -43.7 | -2989.3 | -7908.8 | -882.0 | -2631.8 | -2078.6 | -5238.4 | -883.3 | -2637.1 | -2082.3 | -5251.6 |
| c3mim-ntf2-p3  | -61.0  | -38.4 | -2986.9 | -7903.5 | -881.5 | -2630.6 | -2079.1 | -5238.3 | -883.0 | -2636.5 | -2082.3 | -5250.3 |
| c3mim-ntf2-p4  | -86.4  | -60.8 | -2996.0 | -7919.5 | -881.2 | -2629.1 | -2079.3 | -5239.5 | -883.1 | -2636.4 | -2082.8 | -5252.2 |
| c3mim-pf6-p1   | -48.6  | -33.3 | -1929.1 | -5292.0 | -881.4 | -2629.4 | -1028.0 | -2633.8 | -882.6 | -2634.1 | -1029.9 | -2641.3 |
| c3mim-pf6-p2   | -43.5  | -29.2 | -1926.6 | -5288.6 | -880.9 | -2628.6 | -1028.1 | -2634.1 | -882.0 | -2633.0 | -1029.8 | -2641.0 |
| c3mim-tos-p1   | -64.1  | -42.7 | -2158.8 | -5963.8 | -882.2 | -2630.9 | -1248.8 | -3296.7 | -883.8 | -2636.9 | -1251.7 | -3307.6 |
| c3mim-tos-p2   | -60.9  | -40.7 | -2157.0 | -5961.4 | -881.8 | -2630.1 | -1248.8 | -3296.8 | -883.4 | -2635.9 | -1251.5 | -3307.0 |



|                |       |       |         |         |        |         |         |         |        |         |         |         |
|----------------|-------|-------|---------|---------|--------|---------|---------|---------|--------|---------|---------|---------|
| c3mpyr-bf4-p1  | -39.6 | -26.5 | -1535.4 | -4495.5 | -846.1 | -2734.8 | -672.6  | -1737.8 | -847.1 | -2738.7 | -674.1  | -1744.5 |
| c3mpyr-bf4-p2  | -36.2 | -24.4 | -1534.4 | -4493.8 | -846.4 | -2735.2 | -672.6  | -1737.9 | -847.2 | -2738.5 | -674.1  | -1744.1 |
| c3mpyr-bf4-p3  | -36.0 | -24.0 | -1534.0 | -4493.6 | -846.1 | -2735.1 | -672.6  | -1737.8 | -847.0 | -2738.4 | -674.1  | -1744.1 |
| c3mpyr-br-p1   | -57.9 | -37.7 | -986.1  | -3042.4 | -846.7 | -2736.0 | -114.2  | -273.7  | -847.1 | -2737.5 | -118.9  | -287.3  |
| c3mpyr-br-p2   | -54.1 | -35.2 | -984.3  | -3040.5 | -846.6 | -2736.3 | -114.2  | -273.7  | -847.0 | -2737.5 | -118.6  | -286.5  |
| c3mpyr-br-p3   | -54.1 | -35.3 | -984.4  | -3040.4 | -846.7 | -2736.2 | -114.2  | -273.7  | -847.0 | -2737.5 | -118.6  | -286.5  |
| c3mpyr-cl-p1   | -44.4 | -32.3 | -983.1  | -3071.8 | -846.8 | -2736.1 | -116.6  | -311.0  | -847.2 | -2737.6 | -118.3  | -319.4  |
| c3mpyr-cl-p2   | -42.3 | -30.9 | -982.1  | -3070.8 | -846.6 | -2736.5 | -116.6  | -311.0  | -846.9 | -2737.8 | -118.2  | -319.0  |
| c3mpyr-cl-p3   | -41.6 | -30.6 | -982.0  | -3070.3 | -846.7 | -2736.4 | -116.6  | -311.0  | -847.1 | -2737.6 | -118.2  | -318.9  |
| c3mpyr-dca-p1  | -51.3 | -37.6 | -1420.8 | -4190.6 | -846.3 | -2735.3 | -551.8  | -1426.7 | -847.3 | -2739.0 | -553.5  | -1433.9 |
| c3mpyr-dca-p2  | -53.5 | -39.4 | -1421.4 | -4192.2 | -846.2 | -2735.3 | -551.8  | -1426.8 | -847.2 | -2739.0 | -553.6  | -1434.4 |
| c3mpyr-dca-p3  | -49.5 | -36.3 | -1418.8 | -4192.5 | -846.3 | -2735.3 | -552.1  | -1428.1 | -847.2 | -2738.8 | -553.9  | -1435.1 |
| c3mpyr-dca-p4  | -52.3 | -38.4 | -1420.8 | -4191.8 | -846.4 | -2735.4 | -551.7  | -1426.7 | -847.4 | -2739.0 | -553.5  | -1434.2 |
| c3mpyr-dca-p5  | -54.5 | -40.0 | -1421.6 | -4193.0 | -846.3 | -2735.3 | -551.7  | -1426.8 | -847.3 | -2739.1 | -553.6  | -1434.6 |
| c3mpyr-mes-p1  | -50.5 | -32.5 | -1532.9 | -4524.3 | -846.1 | -2735.2 | -664.5  | -1760.9 | -847.3 | -2739.6 | -667.0  | -1770.8 |
| c3mpyr-mes-p2  | -45.4 | -29.0 | -1531.3 | -4522.0 | -846.7 | -2735.7 | -664.6  | -1761.0 | -847.7 | -2739.6 | -666.9  | -1770.2 |
| c3mpyr-mes-p3  | -44.2 | -27.9 | -1530.6 | -4521.2 | -846.3 | -2735.8 | -664.5  | -1760.9 | -847.2 | -2739.5 | -666.9  | -1770.2 |
| c3mpyr-ntf2-p1 | -67.5 | -44.9 | -2951.6 | -8014.1 | -846.4 | -2734.9 | -2077.8 | -5239.1 | -847.9 | -2740.5 | -2081.2 | -5251.2 |
| c3mpyr-ntf2-p2 | -52.4 | -32.9 | -2945.7 | -8003.3 | -846.1 | -2734.7 | -2077.7 | -5238.1 | -847.4 | -2739.7 | -2080.5 | -5248.6 |
| c3mpyr-ntf2-p3 | -63.2 | -41.9 | -2949.7 | -8011.2 | -846.1 | -2734.7 | -2077.8 | -5239.1 | -847.4 | -2739.8 | -2081.1 | -5250.8 |
| c3mpyr-ntf2-p4 | -64.0 | -42.5 | -2950.0 | -8011.6 | -846.2 | -2734.9 | -2077.8 | -5238.9 | -847.5 | -2740.0 | -2081.0 | -5250.7 |
| c3mpyr-ntf2-p5 | -54.2 | -34.4 | -2946.0 | -8004.3 | -845.9 | -2734.6 | -2077.6 | -5238.0 | -847.1 | -2739.4 | -2080.5 | -5248.8 |
| c3mpyr-ntf2-p6 | -53.0 | -33.8 | -2946.0 | -8003.9 | -846.2 | -2734.9 | -2077.7 | -5238.1 | -847.4 | -2739.5 | -2080.6 | -5248.6 |
| c3mpyr-pf6-p1  | -41.9 | -27.5 | -1891.6 | -5393.7 | -846.0 | -2734.6 | -1028.2 | -2634.5 | -847.0 | -2738.4 | -1030.2 | -2642.2 |
| c3mpyr-pf6-p2  | -37.8 | -24.8 | -1890.2 | -5391.5 | -846.2 | -2734.9 | -1028.2 | -2634.6 | -847.1 | -2738.2 | -1030.0 | -2641.6 |
| c3mpyr-pf6-p3  | -37.8 | -24.7 | -1890.0 | -5391.6 | -846.1 | -2734.8 | -1028.2 | -2634.6 | -846.9 | -2738.2 | -1030.1 | -2641.8 |
| c3mpyr-tos-p1  | -50.6 | -31.1 | -2116.8 | -6062.0 | -846.1 | -2735.2 | -1248.5 | -3298.3 | -847.4 | -2740.2 | -1251.3 | -3308.8 |
| c3mpyr-tos-p2  | -45.6 | -27.7 | -2115.1 | -6059.6 | -846.6 | -2735.6 | -1248.6 | -3298.4 | -847.8 | -2740.0 | -1251.1 | -3308.1 |
| c4mim-bf4-p1   | -43.3 | -29.1 | -1664.9 | -4693.7 | -973.9 | -2928.6 | -673.1  | -1739.7 | -975.1 | -2933.1 | -674.7  | -1746.6 |
| c4mim-bf4-p2   | -41.9 | -28.3 | -1664.1 | -4692.6 | -973.8 | -2928.2 | -673.1  | -1739.7 | -974.9 | -2932.6 | -674.7  | -1746.2 |
| c4mim-br-p1    | -59.2 | -38.3 | -1116.1 | -3247.4 | -976.2 | -2940.4 | -114.2  | -273.7  | -976.6 | -2942.2 | -119.1  | -287.3  |
| c4mim-br-p2    | -41.8 | -23.5 | -1110.5 | -3239.1 | -977.1 | -2942.9 | -114.2  | -273.7  | -977.4 | -2944.1 | -118.4  | -286.2  |
| c4mim-br-p3    | -47.1 | -28.2 | -1112.5 | -3241.2 | -976.7 | -2942.1 | -114.2  | -273.7  | -977.0 | -2943.3 | -118.7  | -286.5  |
| c4mim-br-p4    | -60.1 | -39.1 | -1116.5 | -3248.1 | -976.2 | -2940.4 | -114.2  | -273.7  | -976.8 | -2942.4 | -119.0  | -287.3  |
| c4mim-cl-p1    | -44.4 | -31.6 | -1112.2 | -3275.9 | -976.0 | -2940.1 | -116.6  | -311.0  | -976.6 | -2942.0 | -118.4  | -319.6  |
| c4mim-cl-p2    | -30.2 | -19.3 | -1109.0 | -3269.7 | -977.3 | -2943.6 | -116.6  | -311.0  | -977.6 | -2944.8 | -118.2  | -318.8  |
| c4mim-cl-p3    | -34.7 | -23.6 | -1110.4 | -3271.3 | -976.8 | -2942.5 | -116.6  | -311.0  | -977.2 | -2943.8 | -118.2  | -318.9  |
| c4mim-cl-p4    | -44.7 | -31.7 | -1112.2 | -3276.2 | -976.0 | -2940.1 | -116.6  | -311.0  | -976.6 | -2942.2 | -118.4  | -319.5  |
| c4mim-dca-p1   | -74.7 | -56.8 | -1564.2 | -4415.4 | -973.8 | -2929.0 | -558.4  | -1443.5 | -975.2 | -2934.4 | -560.6  | -1452.6 |



|                |       |       |         |         |        |         |         |         |        |         |         |         |
|----------------|-------|-------|---------|---------|--------|---------|---------|---------|--------|---------|---------|---------|
| c4mim-dca-p2   | -78.2 | -60.1 | -1566.2 | -4416.8 | -974.0 | -2929.2 | -558.5  | -1443.2 | -975.4 | -2934.5 | -560.6  | -1452.4 |
| c4mim-dca-p3   | -72.9 | -55.9 | -1562.6 | -4413.4 | -973.3 | -2928.2 | -558.4  | -1443.2 | -974.7 | -2933.5 | -560.3  | -1451.5 |
| c4mim-mes-p1   | -63.1 | -43.2 | -1666.8 | -4724.5 | -974.7 | -2930.1 | -664.3  | -1759.1 | -976.1 | -2935.4 | -667.0  | -1769.6 |
| c4mim-mes-p2   | -54.2 | -36.5 | -1661.2 | -4717.8 | -973.4 | -2927.9 | -664.4  | -1759.2 | -974.7 | -2932.8 | -666.7  | -1768.4 |
| c4mim-pf6-p1   | -50.9 | -34.2 | -2022.9 | -5592.6 | -973.8 | -2928.6 | -1028.0 | -2634.1 | -975.1 | -2933.5 | -1030.2 | -2642.5 |
| c4mim-pf6-p2   | -43.7 | -29.3 | -2018.8 | -5587.5 | -973.1 | -2927.3 | -1028.1 | -2634.1 | -974.3 | -2931.7 | -1029.9 | -2641.1 |
| c4mim-tos-p1   | -67.2 | -44.7 | -2252.5 | -6264.7 | -974.6 | -2929.9 | -1248.8 | -3296.7 | -976.2 | -2936.1 | -1251.9 | -3308.2 |
| c4mim-tos-p2   | -61.9 | -41.4 | -2250.2 | -6261.2 | -974.5 | -2929.5 | -1248.8 | -3296.7 | -976.0 | -2935.3 | -1251.6 | -3307.1 |
| c4mpyr-bf4-p1  | -39.9 | -26.6 | -1627.8 | -4795.4 | -938.4 | -3034.5 | -672.6  | -1737.8 | -939.4 | -3038.3 | -674.2  | -1744.7 |
| c4mpyr-bf4-p2  | -36.7 | -24.6 | -1626.8 | -4793.8 | -938.7 | -3034.8 | -672.6  | -1737.9 | -939.6 | -3038.2 | -674.1  | -1744.2 |
| c4mpyr-bf4-p3  | -36.3 | -24.2 | -1626.5 | -4793.6 | -938.5 | -3034.8 | -672.6  | -1737.9 | -939.4 | -3038.2 | -674.1  | -1744.3 |
| c4mpyr-br-p1   | -58.4 | -38.0 | -1078.6 | -3342.4 | -939.1 | -3035.7 | -114.2  | -273.7  | -939.5 | -3037.1 | -118.9  | -287.4  |
| c4mpyr-br-p2   | -54.7 | -35.6 | -1076.9 | -3340.7 | -939.0 | -3036.0 | -114.2  | -273.7  | -939.3 | -3037.3 | -118.7  | -286.7  |
| c4mpyr-br-p3   | -54.6 | -35.5 | -1077.0 | -3340.3 | -939.0 | -3035.9 | -114.2  | -273.7  | -939.3 | -3037.1 | -118.7  | -286.7  |
| c4mpyr-cl-p1   | -44.5 | -32.4 | -1075.4 | -3371.6 | -939.1 | -3035.7 | -116.6  | -311.0  | -939.5 | -3037.2 | -118.3  | -319.5  |
| c4mpyr-cl-p2   | -43.2 | -31.5 | -1074.8 | -3371.2 | -938.9 | -3036.2 | -116.6  | -311.0  | -939.3 | -3037.6 | -118.3  | -319.3  |
| c4mpyr-cl-p3   | -41.7 | -30.6 | -1074.3 | -3370.1 | -939.1 | -3036.0 | -116.6  | -311.0  | -939.4 | -3037.3 | -118.2  | -319.0  |
| c4mpyr-dca-p1  | -53.2 | -38.0 | -1512.6 | -4492.3 | -938.5 | -3034.5 | -551.8  | -1427.0 | -939.7 | -3038.6 | -553.7  | -1434.9 |
| c4mpyr-dca-p2  | -53.7 | -39.5 | -1513.8 | -4492.0 | -938.6 | -3035.0 | -551.8  | -1426.8 | -939.5 | -3038.7 | -553.6  | -1434.5 |
| c4mpyr-dca-p3  | -52.5 | -38.5 | -1513.5 | -4490.9 | -938.6 | -3034.8 | -551.8  | -1426.7 | -939.6 | -3038.7 | -553.5  | -1434.1 |
| c4mpyr-dca-p4  | -54.0 | -38.8 | -1513.4 | -4492.7 | -938.6 | -3034.9 | -551.8  | -1426.9 | -939.7 | -3039.1 | -553.7  | -1434.9 |
| c4mpyr-dca-p5  | -54.8 | -40.2 | -1514.0 | -4492.9 | -938.6 | -3034.9 | -551.7  | -1426.8 | -939.6 | -3038.8 | -553.6  | -1434.7 |
| c4mpyr-mes-p1  | -50.7 | -32.6 | -1625.3 | -4824.2 | -938.5 | -3034.9 | -664.5  | -1760.9 | -939.6 | -3039.3 | -667.1  | -1771.0 |
| c4mpyr-mes-p2  | -46.3 | -29.5 | -1623.9 | -4822.3 | -939.0 | -3035.4 | -664.6  | -1761.0 | -940.0 | -3039.3 | -667.0  | -1770.5 |
| c4mpyr-mes-p3  | -44.7 | -28.1 | -1623.1 | -4821.2 | -938.6 | -3035.5 | -664.5  | -1760.9 | -939.6 | -3039.3 | -666.9  | -1770.4 |
| c4mpyr-ntf2-p1 | -68.1 | -44.9 | -3044.0 | -8314.1 | -938.7 | -3034.5 | -2077.8 | -5239.0 | -940.2 | -3040.2 | -2081.3 | -5251.4 |
| c4mpyr-ntf2-p2 | -59.4 | -37.4 | -3040.4 | -8306.9 | -938.4 | -3034.2 | -2077.6 | -5237.7 | -939.8 | -3039.7 | -2080.8 | -5249.5 |
| c4mpyr-ntf2-p3 | -65.1 | -43.0 | -3042.8 | -8312.1 | -938.4 | -3034.5 | -2077.8 | -5239.0 | -939.8 | -3039.8 | -2081.2 | -5251.2 |
| c4mpyr-ntf2-p4 | -65.7 | -43.5 | -3043.0 | -8312.5 | -938.5 | -3034.5 | -2077.8 | -5239.0 | -939.9 | -3039.8 | -2081.2 | -5251.1 |
| c4mpyr-ntf2-p5 | -55.4 | -35.0 | -3038.7 | -8304.8 | -938.2 | -3034.3 | -2077.6 | -5238.0 | -939.5 | -3039.2 | -2080.6 | -5249.1 |
| c4mpyr-ntf2-p6 | -55.3 | -35.2 | -3039.2 | -8304.9 | -938.6 | -3034.5 | -2077.7 | -5238.0 | -939.8 | -3039.4 | -2080.7 | -5249.0 |
| c4mpyr-pf6-p1  | -42.2 | -27.6 | -1984.0 | -5693.6 | -938.3 | -3034.3 | -1028.2 | -2634.6 | -939.3 | -3038.2 | -1030.2 | -2642.4 |
| c4mpyr-pf6-p2  | -38.5 | -25.3 | -1982.8 | -5691.7 | -938.6 | -3034.6 | -1028.2 | -2634.6 | -939.5 | -3038.0 | -1030.1 | -2641.8 |
| c4mpyr-pf6-p3  | -38.3 | -24.9 | -1982.5 | -5691.6 | -938.4 | -3034.5 | -1028.2 | -2634.6 | -939.3 | -3037.9 | -1030.1 | -2641.9 |
| c4mpyr-tos-p1  | -51.1 | -31.3 | -2209.4 | -6362.1 | -938.5 | -3035.0 | -1248.6 | -3298.3 | -939.8 | -3039.9 | -1251.4 | -3309.0 |
| c4mpyr-tos-p2  | -46.6 | -28.3 | -2207.9 | -6360.1 | -939.0 | -3035.4 | -1248.6 | -3298.4 | -940.2 | -3039.8 | -1251.2 | -3308.4 |



## 2.2.17 CC(T+d) basis set

Table S 18: Raw CC(T+d) energies. Superscript \* indicates monomer calculated in the dimer basis set.

| ion pair       | E(int) | E(int) CP | E(dimer) SS | E(dimer) OS | E(A) SS | E(A) OS | E(B) SS | E(B) OS | E(A) SS* | E(A) OS* | E(B) SS* | E(B) OS* |
|----------------|--------|-----------|-------------|-------------|---------|---------|---------|---------|----------|----------|----------|----------|
| clmim-bf4-p1   | -36.2  | -25.1     | -1584.7     | -4600.0     | -783.0  | -2420.1 | -785.9  | -2159.4 | -783.4   | -2421.4  | -788.8   | -2165.9  |
| clmim-br-p1    | -48.3  | -37.4     | -984.7      | -2878.7     | -785.0  | -2427.9 | -177.4  | -425.0  | -785.2   | -2428.6  | -180.2   | -432.0   |
| clmim-br-p2    | -33.3  | -24.2     | -978.2      | -2870.1     | -784.7  | -2427.9 | -177.4  | -425.0  | -784.8   | -2428.3  | -179.8   | -431.3   |
| clmim-cl-p1    | -39.9  | -30.5     | -933.5      | -2838.3     | -784.8  | -2427.6 | -130.4  | -389.2  | -785.0   | -2428.3  | -132.6   | -395.5   |
| clmim-cl-p2    | -30.7  | -22.9     | -930.4      | -2833.3     | -785.0  | -2428.5 | -130.4  | -389.2  | -785.0   | -2428.8  | -132.0   | -394.9   |
| clmim-dca-p1   | -62.3  | -54.3     | -1436.5     | -4162.9     | -783.5  | -2421.4 | -624.1  | -1708.2 | -783.9   | -2422.7  | -625.9   | -1712.6  |
| clmim-dca-p2   | -47.0  | -40.6     | -1429.7     | -4155.4     | -783.6  | -2422.5 | -623.7  | -1708.2 | -783.8   | -2423.2  | -625.2   | -1712.3  |
| clmim-mes-p1   | -48.4  | -34.4     | -1556.7     | -4560.9     | -783.5  | -2420.9 | -750.3  | -2114.4 | -783.8   | -2422.2  | -754.4   | -2122.8  |
| clmim-ntf2-p1  | -74.4  | -60.4     | -3205.6     | -8867.1     | -783.1  | -2420.2 | -2389.0 | -6406.0 | -783.5   | -2422.0  | -2392.7  | -6414.1  |
| clmim-ntf2-p2  | -43.3  | -33.4     | -3192.1     | -8849.0     | -783.4  | -2422.0 | -2388.2 | -6404.3 | -783.5   | -2422.8  | -2390.8  | -6410.6  |
| clmim-ntf2-p3  | -45.0  | -34.1     | -3193.8     | -8849.3     | -783.1  | -2421.0 | -2389.0 | -6405.1 | -783.4   | -2422.2  | -2391.9  | -6411.5  |
| clmim-pf6-p1   | -39.5  | -27.2     | -1997.6     | -5705.6     | -783.0  | -2420.2 | -1197.2 | -3263.3 | -783.3   | -2421.3  | -1200.8  | -3270.5  |
| clmim-tos-p1   | -45.1  | -32.2     | -2204.6     | -6380.5     | -783.2  | -2420.7 | -1399.9 | -3936.2 | -783.5   | -2421.9  | -1403.6  | -3943.8  |
| clmpyr-bf4-p1  | -37.4  | -26.4     | -1543.5     | -4712.1     | -741.1  | -2533.7 | -785.5  | -2158.0 | -741.2   | -2534.4  | -788.7   | -2164.9  |
| clmpyr-bf4-p2  | -34.5  | -24.7     | -1542.3     | -4710.8     | -741.2  | -2533.9 | -785.5  | -2158.0 | -741.3   | -2534.4  | -788.4   | -2164.3  |
| clmpyr-br-p1   | -50.3  | -40.0     | -942.3      | -2986.8     | -741.7  | -2534.7 | -177.4  | -425.0  | -741.8   | -2535.0  | -180.2   | -432.1   |
| clmpyr-br-p2   | -47.9  | -38.2     | -941.2      | -2985.7     | -741.7  | -2534.9 | -177.4  | -425.0  | -741.8   | -2535.2  | -180.0   | -431.7   |
| clmpyr-cl-p1   | -44.0  | -35.4     | -892.4      | -2947.8     | -741.8  | -2534.8 | -130.4  | -389.2  | -741.8   | -2535.1  | -132.5   | -395.4   |
| clmpyr-cl-p2   | -42.8  | -34.6     | -891.8      | -2947.3     | -741.8  | -2535.0 | -130.4  | -389.2  | -741.8   | -2535.2  | -132.4   | -395.1   |
| clmpyr-dca-p1  | -44.0  | -37.7     | -1381.1     | -4250.3     | -741.6  | -2534.4 | -618.1  | -1693.3 | -741.7   | -2535.0  | -619.8   | -1697.2  |
| clmpyr-dca-p2  | -47.5  | -41.3     | -1382.1     | -4252.6     | -741.4  | -2534.1 | -618.1  | -1693.6 | -741.6   | -2534.8  | -619.7   | -1697.4  |
| clmpyr-dca-p3  | -44.9  | -38.7     | -1379.3     | -4252.9     | -741.1  | -2533.9 | -618.1  | -1694.3 | -741.3   | -2534.6  | -619.5   | -1698.2  |
| clmpyr-dca-p4  | -46.1  | -39.9     | -1381.2     | -4251.6     | -741.1  | -2533.9 | -618.1  | -1693.6 | -741.3   | -2534.6  | -619.7   | -1697.3  |
| clmpyr-mes-p1  | -45.8  | -32.6     | -1513.5     | -4673.2     | -741.1  | -2534.0 | -750.3  | -2115.5 | -741.2   | -2534.7  | -754.3   | -2124.0  |
| clmpyr-mes-p2  | -40.9  | -29.2     | -1511.4     | -4671.0     | -741.3  | -2534.3 | -750.3  | -2115.5 | -741.4   | -2534.9  | -753.7   | -2123.1  |
| clmpyr-ntf2-p1 | -52.6  | -42.1     | -3152.6     | -8967.7     | -741.4  | -2533.8 | -2387.4 | -6405.2 | -741.6   | -2534.5  | -2390.4  | -6411.7  |
| clmpyr-ntf2-p2 | -40.3  | -31.1     | -3147.6     | -8959.1     | -741.1  | -2533.5 | -2387.4 | -6404.3 | -741.3   | -2534.2  | -2390.1  | -6409.9  |
| clmpyr-ntf2-p3 | -51.3  | -41.1     | -3152.1     | -8966.7     | -741.4  | -2533.9 | -2387.3 | -6404.9 | -741.5   | -2534.5  | -2390.3  | -6411.3  |
| clmpyr-ntf2-p5 | -41.6  | -32.2     | -3148.3     | -8959.6     | -741.3  | -2533.7 | -2387.3 | -6404.0 | -741.5   | -2534.4  | -2390.0  | -6409.8  |
| clmpyr-pf6-p1  | -37.8  | -26.5     | -1955.4     | -5818.0     | -741.1  | -2533.6 | -1197.3 | -3263.6 | -741.2   | -2534.2  | -1200.7  | -3270.7  |
| clmpyr-pf6-p2  | -34.9  | -24.7     | -1954.2     | -5816.7     | -741.2  | -2533.7 | -1197.3 | -3263.7 | -741.3   | -2534.2  | -1200.5  | -3270.3  |
| clmpyr-tos-p1  | -42.4  | -29.9     | -2161.2     | -6492.2     | -741.1  | -2534.0 | -1399.3 | -3936.6 | -741.2   | -2534.7  | -1403.0  | -3944.5  |
| clmpyr-tos-p2  | -37.3  | -26.1     | -2158.6     | -6489.8     | -741.2  | -2534.1 | -1399.2 | -3936.6 | -741.3   | -2534.7  | -1402.6  | -3943.7  |



|               |       |       |         |         |        |         |         |         |        |         |         |         |
|---------------|-------|-------|---------|---------|--------|---------|---------|---------|--------|---------|---------|---------|
| c2mim-bf4-p1  | -38.6 | -26.5 | -1691.1 | -4956.7 | -888.2 | -2775.7 | -785.9  | -2159.4 | -888.6 | -2777.0 | -789.1  | -2166.5 |
| c2mim-bf4-p2  | -35.9 | -24.8 | -1689.3 | -4954.7 | -887.8 | -2775.1 | -785.9  | -2159.4 | -888.1 | -2776.3 | -788.8  | -2165.9 |
| c2mim-br-p1   | -50.0 | -38.6 | -1090.0 | -3234.8 | -889.6 | -2782.9 | -177.4  | -425.0  | -889.8 | -2783.6 | -180.4  | -432.4  |
| c2mim-br-p2   | -37.3 | -27.3 | -1085.9 | -3229.1 | -890.6 | -2784.8 | -177.4  | -425.0  | -890.7 | -2785.2 | -180.0  | -431.9  |
| c2mim-br-p3   | -37.6 | -27.6 | -1085.3 | -3228.4 | -889.8 | -2783.9 | -177.4  | -425.0  | -889.9 | -2784.3 | -180.0  | -431.8  |
| c2mim-br-p4   | -49.8 | -38.8 | -1090.7 | -3235.7 | -890.3 | -2784.0 | -177.4  | -425.0  | -890.5 | -2784.7 | -180.3  | -432.1  |
| c2mim-cl-p1   | -41.8 | -31.9 | -1039.1 | -3194.6 | -889.5 | -2782.8 | -130.4  | -389.2  | -889.7 | -2783.4 | -132.7  | -395.9  |
| c2mim-cl-p2   | -33.4 | -24.9 | -1037.5 | -3191.7 | -890.8 | -2785.4 | -130.4  | -389.2  | -890.9 | -2785.8 | -132.2  | -395.3  |
| c2mim-cl-p3   | -33.9 | -25.2 | -1036.9 | -3191.0 | -890.1 | -2784.4 | -130.4  | -389.2  | -890.1 | -2784.8 | -132.3  | -395.4  |
| c2mim-cl-p4   | -41.0 | -31.4 | -1039.2 | -3195.0 | -890.0 | -2783.6 | -130.4  | -389.2  | -890.2 | -2784.3 | -132.6  | -395.6  |
| c2mim-dca-p1  | -64.2 | -56.0 | -1541.8 | -4519.0 | -888.1 | -2776.1 | -623.9  | -1708.5 | -888.5 | -2777.4 | -625.8  | -1713.1 |
| c2mim-dca-p2  | -60.3 | -52.4 | -1540.4 | -4516.6 | -888.3 | -2776.1 | -624.0  | -1708.3 | -888.6 | -2777.4 | -625.9  | -1712.7 |
| c2mim-dca-p3  | -64.5 | -56.3 | -1543.0 | -4519.6 | -888.8 | -2776.7 | -624.1  | -1708.3 | -889.1 | -2778.1 | -626.1  | -1713.0 |
| c2mim-dca-p4  | -61.0 | -53.3 | -1540.6 | -4517.0 | -888.2 | -2776.1 | -624.0  | -1708.3 | -888.5 | -2777.4 | -625.8  | -1712.5 |
| c2mim-dca-p5  | -62.6 | -54.5 | -1541.3 | -4518.0 | -888.2 | -2776.2 | -624.1  | -1708.2 | -888.6 | -2777.6 | -625.9  | -1712.7 |
| c2mim-dca-p6  | -62.7 | -54.7 | -1541.0 | -4518.0 | -888.1 | -2775.8 | -624.1  | -1708.3 | -888.4 | -2777.2 | -625.9  | -1712.7 |
| c2mim-mes-p1  | -54.3 | -39.2 | -1664.8 | -4919.8 | -889.0 | -2776.9 | -750.3  | -2114.3 | -889.3 | -2778.1 | -754.6  | -2123.3 |
| c2mim-mes-p2  | -49.2 | -34.9 | -1661.5 | -4916.3 | -888.1 | -2775.7 | -750.3  | -2114.4 | -888.5 | -2777.0 | -754.5  | -2123.0 |
| c2mim-ntf2-p1 | -81.2 | -65.6 | -3314.0 | -9226.3 | -888.3 | -2775.8 | -2389.0 | -6406.0 | -888.8 | -2777.6 | -2393.2 | -6415.1 |
| c2mim-ntf2-p2 | -54.0 | -42.1 | -3302.3 | -9211.4 | -888.5 | -2777.5 | -2388.5 | -6405.2 | -888.8 | -2778.4 | -2391.8 | -6412.6 |
| c2mim-ntf2-p3 | -48.5 | -36.7 | -3300.6 | -9206.3 | -888.1 | -2776.3 | -2389.0 | -6405.1 | -888.4 | -2777.5 | -2392.2 | -6412.0 |
| c2mim-ntf2-p4 | -71.5 | -57.3 | -3309.9 | -9221.1 | -888.2 | -2775.8 | -2389.2 | -6406.2 | -888.6 | -2777.5 | -2393.1 | -6414.6 |
| c2mim-pf6-p1  | -43.8 | -30.0 | -2104.7 | -6063.3 | -888.1 | -2775.6 | -1197.2 | -3263.2 | -888.4 | -2776.8 | -1201.2 | -3271.4 |
| c2mim-pf6-p2  | -39.8 | -27.4 | -2102.3 | -6060.7 | -887.7 | -2775.0 | -1197.2 | -3263.3 | -888.0 | -2776.1 | -1200.8 | -3270.6 |
| c2mim-tos-p1  | -52.9 | -38.2 | -2313.8 | -6740.4 | -888.8 | -2776.7 | -1399.9 | -3936.0 | -889.2 | -2778.0 | -1404.1 | -3944.7 |
| c2mim-tos-p2  | -46.8 | -33.1 | -2310.3 | -6736.4 | -888.1 | -2775.8 | -1399.9 | -3936.1 | -888.5 | -2777.1 | -1403.8 | -3944.2 |
| c2mpyr-bf4-p1 | -38.1 | -26.8 | -1650.6 | -5070.7 | -847.9 | -2891.8 | -785.5  | -2157.9 | -848.0 | -2892.6 | -788.8  | -2165.1 |
| c2mpyr-bf4-p2 | -35.9 | -25.2 | -1650.1 | -5070.0 | -848.4 | -2892.3 | -785.5  | -2158.0 | -848.5 | -2893.0 | -788.6  | -2164.8 |
| c2mpyr-bf4-p3 | -35.5 | -25.2 | -1649.5 | -5069.5 | -848.0 | -2892.1 | -785.5  | -2158.0 | -848.1 | -2892.7 | -788.5  | -2164.5 |
| c2mpyr-br-p1  | -51.4 | -40.7 | -1049.6 | -3345.5 | -848.5 | -2892.8 | -177.4  | -425.0  | -848.6 | -2893.1 | -180.3  | -432.3  |
| c2mpyr-br-p2  | -49.8 | -39.4 | -1048.8 | -3345.1 | -848.5 | -2893.3 | -177.4  | -425.0  | -848.5 | -2893.6 | -180.2  | -432.1  |
| c2mpyr-br-p3  | -48.9 | -38.9 | -1048.3 | -3344.3 | -848.4 | -2892.9 | -177.4  | -425.0  | -848.5 | -2893.2 | -180.1  | -431.9  |
| c2mpyr-cl-p1  | -44.6 | -35.7 | -999.4  | -3306.2 | -848.6 | -2892.9 | -130.4  | -389.2  | -848.7 | -2893.2 | -132.5  | -395.5  |
| c2mpyr-cl-p2  | -43.6 | -34.9 | -998.7  | -3305.9 | -848.3 | -2893.1 | -130.4  | -389.2  | -848.4 | -2893.4 | -132.5  | -395.4  |
| c2mpyr-cl-p3  | -43.1 | -34.7 | -998.7  | -3305.6 | -848.6 | -2893.1 | -130.4  | -389.2  | -848.6 | -2893.3 | -132.4  | -395.2  |
| c2mpyr-dca-p1 | -44.1 | -37.8 | -1487.9 | -4608.5 | -848.4 | -2892.5 | -618.1  | -1693.3 | -848.5 | -2893.1 | -619.8  | -1697.2 |
| c2mpyr-dca-p2 | -47.5 | -40.9 | -1489.0 | -4610.5 | -848.0 | -2892.2 | -618.2  | -1693.7 | -848.2 | -2892.9 | -619.9  | -1697.6 |
| c2mpyr-dca-p3 | -47.9 | -41.6 | -1489.0 | -4610.9 | -848.1 | -2892.2 | -618.1  | -1693.6 | -848.3 | -2892.9 | -619.7  | -1697.4 |
| c2mpyr-mes-p1 | -47.5 | -33.5 | -1620.9 | -5032.4 | -847.9 | -2892.1 | -750.3  | -2115.5 | -848.1 | -2892.9 | -754.5  | -2124.3 |



|                |       |       |         |         |        |         |         |         |        |         |         |         |
|----------------|-------|-------|---------|---------|--------|---------|---------|---------|--------|---------|---------|---------|
| c2mpyr-mes-p2  | -43.9 | -30.8 | -1619.8 | -5031.3 | -848.6 | -2892.7 | -750.3  | -2115.6 | -848.7 | -2893.3 | -754.3  | -2124.0 |
| c2mpyr-mes-p3  | -42.7 | -30.3 | -1618.8 | -5030.2 | -848.1 | -2892.5 | -750.3  | -2115.5 | -848.2 | -2893.2 | -754.0  | -2123.4 |
| c2mpyr-ntf2-p1 | -53.7 | -42.8 | -3260.2 | -9326.4 | -848.2 | -2891.8 | -2387.5 | -6405.3 | -848.4 | -2892.6 | -2390.7 | -6412.0 |
| c2mpyr-ntf2-p2 | -42.7 | -32.9 | -3255.4 | -9318.6 | -847.9 | -2891.6 | -2387.4 | -6404.4 | -848.0 | -2892.4 | -2390.3 | -6410.4 |
| c2mpyr-ntf2-p3 | -52.8 | -41.9 | -3259.6 | -9325.7 | -848.0 | -2891.9 | -2387.4 | -6405.1 | -848.2 | -2892.6 | -2390.6 | -6411.9 |
| c2mpyr-ntf2-p4 | -51.8 | -41.4 | -3259.0 | -9325.4 | -848.0 | -2891.9 | -2387.5 | -6405.2 | -848.2 | -2892.5 | -2390.5 | -6411.8 |
| c2mpyr-ntf2-p5 | -44.2 | -34.2 | -3255.9 | -9319.2 | -847.7 | -2891.6 | -2387.3 | -6404.2 | -847.9 | -2892.3 | -2390.3 | -6410.5 |
| c2mpyr-ntf2-p6 | -41.6 | -32.3 | -3255.3 | -9318.2 | -848.1 | -2891.9 | -2387.5 | -6404.4 | -848.2 | -2892.5 | -2390.2 | -6410.2 |
| c2mpyr-pf6-p1  | -38.3 | -26.8 | -2062.6 | -6176.6 | -848.1 | -2892.0 | -1197.3 | -3263.6 | -848.2 | -2892.6 | -1200.8 | -3270.8 |
| c2mpyr-pf6-p2  | -36.3 | -25.3 | -2061.8 | -6175.7 | -848.1 | -2892.0 | -1197.3 | -3263.7 | -848.3 | -2892.5 | -1200.7 | -3270.7 |
| c2mpyr-pf6-p3  | -35.7 | -25.1 | -2061.3 | -6175.3 | -848.0 | -2891.9 | -1197.3 | -3263.7 | -848.1 | -2892.4 | -1200.6 | -3270.4 |
| c2mpyr-tos-p1  | -44.2 | -31.1 | -2268.7 | -6851.4 | -847.9 | -2892.1 | -1399.3 | -3936.7 | -848.1 | -2892.9 | -1403.2 | -3944.9 |
| c2mpyr-tos-p2  | -40.8 | -28.5 | -2267.7 | -6850.3 | -848.5 | -2892.6 | -1399.3 | -3936.7 | -848.7 | -2893.3 | -1403.0 | -3944.5 |
| c3mim-bf4-p1   | -39.5 | -27.0 | -1795.3 | -5311.6 | -992.0 | -3130.2 | -785.9  | -2159.4 | -992.3 | -3131.5 | -789.2  | -2166.8 |
| c3mim-bf4-p2   | -38.5 | -26.6 | -1794.8 | -5311.2 | -992.0 | -3130.1 | -785.9  | -2159.4 | -992.3 | -3131.5 | -789.1  | -2166.5 |
| c3mim-br-p1    | -50.8 | -39.1 | -1194.2 | -3590.2 | -993.4 | -3137.9 | -177.4  | -425.0  | -993.6 | -3138.6 | -180.5  | -432.6  |
| c3mim-br-p2    | -37.8 | -27.6 | -1189.7 | -3584.1 | -994.1 | -3139.5 | -177.4  | -425.0  | -994.2 | -3140.0 | -180.0  | -431.9  |
| c3mim-br-p3    | -42.1 | -31.1 | -1191.3 | -3585.9 | -993.7 | -3139.0 | -177.4  | -425.0  | -993.8 | -3139.4 | -180.3  | -432.5  |
| c3mim-br-p4    | -51.8 | -39.8 | -1194.9 | -3591.5 | -993.7 | -3138.5 | -177.4  | -425.0  | -993.9 | -3139.3 | -180.6  | -432.8  |
| c3mim-cl-p1    | -42.3 | -32.2 | -1143.0 | -3549.8 | -993.3 | -3137.6 | -130.4  | -389.2  | -993.5 | -3138.3 | -132.8  | -396.0  |
| c3mim-cl-p2    | -33.6 | -25.0 | -1141.1 | -3546.5 | -994.3 | -3140.1 | -130.4  | -389.2  | -994.5 | -3140.5 | -132.2  | -395.4  |
| c3mim-cl-p3    | -37.0 | -27.6 | -1142.2 | -3547.7 | -993.9 | -3139.4 | -130.4  | -389.2  | -994.0 | -3139.8 | -132.6  | -395.9  |
| c3mim-cl-p4    | -42.3 | -32.1 | -1143.1 | -3550.4 | -993.5 | -3138.2 | -130.4  | -389.2  | -993.7 | -3138.9 | -132.8  | -396.1  |
| c3mim-dca-p1   | -65.2 | -56.8 | -1646.0 | -4874.0 | -991.9 | -3130.3 | -624.0  | -1708.6 | -992.2 | -3131.8 | -625.9  | -1713.2 |
| c3mim-dca-p2   | -66.2 | -57.8 | -1646.8 | -4875.1 | -992.3 | -3131.0 | -624.0  | -1708.4 | -992.7 | -3132.4 | -626.0  | -1713.0 |
| c3mim-dca-p3   | -57.3 | -49.5 | -1643.0 | -4870.7 | -992.3 | -3131.8 | -623.8  | -1708.5 | -992.6 | -3132.8 | -625.6  | -1713.2 |
| c3mim-dca-p4   | -67.7 | -58.9 | -1647.6 | -4874.9 | -992.0 | -3130.6 | -624.0  | -1708.3 | -992.4 | -3132.0 | -626.1  | -1713.1 |
| c3mim-dca-p5   | -63.8 | -55.7 | -1644.6 | -4872.6 | -991.4 | -3129.8 | -623.9  | -1708.3 | -991.8 | -3131.3 | -625.7  | -1712.7 |
| c3mim-dca-p6   | -62.9 | -54.8 | -1644.4 | -4872.3 | -991.5 | -3129.8 | -624.1  | -1708.4 | -991.9 | -3131.2 | -625.9  | -1712.8 |
| c3mim-mes-p1   | -57.1 | -41.2 | -1770.1 | -5276.0 | -992.8 | -3131.6 | -750.3  | -2114.3 | -993.2 | -3132.9 | -754.9  | -2123.9 |
| c3mim-mes-p2   | -49.8 | -35.3 | -1765.3 | -5270.8 | -991.7 | -3129.8 | -750.3  | -2114.5 | -992.0 | -3131.1 | -754.6  | -2123.2 |
| c3mim-ntf2-p1  | -85.0 | -68.4 | -3419.5 | -9582.8 | -992.0 | -3130.3 | -2389.0 | -6406.1 | -992.5 | -3132.2 | -2393.5 | -6415.7 |
| c3mim-ntf2-p2  | -58.3 | -45.6 | -3408.1 | -9567.9 | -992.2 | -3131.7 | -2388.5 | -6405.2 | -992.5 | -3132.7 | -2392.1 | -6413.1 |
| c3mim-ntf2-p3  | -50.4 | -38.1 | -3405.2 | -9561.7 | -991.8 | -3130.7 | -2389.0 | -6405.1 | -992.1 | -3132.0 | -2392.3 | -6412.4 |
| c3mim-ntf2-p4  | -72.7 | -58.6 | -3413.6 | -9575.8 | -991.6 | -3129.5 | -2389.2 | -6406.3 | -992.0 | -3131.2 | -2393.0 | -6414.5 |
| c3mim-pf6-p1   | -44.0 | -30.9 | -2208.1 | -6417.6 | -991.7 | -3129.8 | -1197.1 | -3263.1 | -992.0 | -3130.9 | -1201.0 | -3270.9 |
| c3mim-pf6-p2   | -39.9 | -27.5 | -2205.9 | -6414.9 | -991.3 | -3129.1 | -1197.2 | -3263.3 | -991.5 | -3130.2 | -1200.8 | -3270.7 |
| c3mim-tos-p1   | -56.3 | -40.7 | -2419.3 | -7096.8 | -992.6 | -3131.3 | -1399.9 | -3936.0 | -993.0 | -3132.7 | -1404.3 | -3945.3 |
| c3mim-tos-p2   | -53.0 | -38.3 | -2417.3 | -7094.7 | -992.3 | -3130.7 | -1399.9 | -3936.1 | -992.6 | -3132.1 | -1404.1 | -3944.9 |



|                |       |       |         |         |         |         |         |         |         |         |         |         |
|----------------|-------|-------|---------|---------|---------|---------|---------|---------|---------|---------|---------|---------|
| c3mpyr-bf4-p1  | -38.5 | -27.0 | -1754.4 | -5426.0 | -951.5  | -3246.8 | -785.5  | -2157.9 | -951.7  | -3247.6 | -788.8  | -2165.2 |
| c3mpyr-bf4-p2  | -36.1 | -25.3 | -1753.7 | -5425.0 | -951.9  | -3247.1 | -785.5  | -2158.0 | -952.1  | -3247.8 | -788.6  | -2164.9 |
| c3mpyr-bf4-p3  | -35.9 | -25.4 | -1753.3 | -5424.7 | -951.6  | -3247.0 | -785.5  | -2158.0 | -951.8  | -3247.6 | -788.5  | -2164.6 |
| c3mpyr-br-p1   | -52.3 | -41.4 | -1153.7 | -3701.0 | -952.2  | -3247.8 | -177.4  | -425.0  | -952.3  | -3248.1 | -180.4  | -432.4  |
| c3mpyr-br-p2   | -49.7 | -39.1 | -1152.2 | -3699.8 | -952.1  | -3247.9 | -177.4  | -425.0  | -952.1  | -3248.2 | -180.3  | -432.3  |
| c3mpyr-br-p3   | -49.7 | -39.5 | -1152.3 | -3699.8 | -952.1  | -3247.9 | -177.4  | -425.0  | -952.2  | -3248.2 | -180.2  | -432.0  |
| c3mpyr-cl-p1   | -45.1 | -36.0 | -1103.3 | -3661.5 | -952.2  | -3247.9 | -130.4  | -389.2  | -952.3  | -3248.2 | -132.6  | -395.6  |
| c3mpyr-cl-p2   | -43.9 | -35.1 | -1102.5 | -3661.0 | -952.0  | -3248.0 | -130.4  | -389.2  | -952.1  | -3248.3 | -132.5  | -395.5  |
| c3mpyr-cl-p3   | -43.5 | -34.9 | -1102.5 | -3660.8 | -952.2  | -3248.0 | -130.4  | -389.2  | -952.3  | -3248.3 | -132.4  | -395.3  |
| c3mpyr-dca-p1  | -45.3 | -38.7 | -1591.9 | -4964.1 | -951.8  | -3247.2 | -618.2  | -1693.5 | -952.0  | -3247.9 | -619.9  | -1697.5 |
| c3mpyr-dca-p2  | -47.5 | -40.8 | -1592.6 | -4965.5 | -951.7  | -3247.1 | -618.1  | -1693.7 | -951.8  | -3247.8 | -619.9  | -1697.7 |
| c3mpyr-dca-p3  | -43.7 | -37.5 | -1589.5 | -4965.9 | -951.8  | -3247.2 | -618.2  | -1694.6 | -951.9  | -3247.8 | -619.7  | -1698.4 |
| c3mpyr-dca-p4  | -45.9 | -39.7 | -1591.8 | -4965.0 | -951.9  | -3247.3 | -618.1  | -1693.5 | -952.1  | -3248.0 | -619.7  | -1697.3 |
| c3mpyr-dca-p5  | -47.8 | -41.4 | -1592.6 | -4965.8 | -951.7  | -3247.2 | -618.1  | -1693.6 | -951.9  | -3247.9 | -619.8  | -1697.5 |
| c3mpyr-mes-p1  | -48.4 | -34.1 | -1724.9 | -5387.9 | -951.5  | -3247.1 | -750.3  | -2115.5 | -951.7  | -3247.9 | -754.6  | -2124.5 |
| c3mpyr-mes-p2  | -44.2 | -30.9 | -1723.6 | -5386.4 | -952.2  | -3247.6 | -750.3  | -2115.7 | -952.3  | -3248.3 | -754.4  | -2124.0 |
| c3mpyr-mes-p3  | -43.6 | -30.9 | -1722.9 | -5385.8 | -951.7  | -3247.5 | -750.3  | -2115.5 | -951.9  | -3248.2 | -754.1  | -2123.7 |
| c3mpyr-ntf2-p1 | -55.7 | -44.5 | -3364.8 | -9682.6 | -951.9  | -3247.0 | -2387.5 | -6405.3 | -952.1  | -3247.9 | -2390.8 | -6412.2 |
| c3mpyr-ntf2-p2 | -42.2 | -32.8 | -3359.2 | -9673.0 | -951.6  | -3246.7 | -2387.4 | -6404.3 | -951.8  | -3247.4 | -2390.1 | -6410.1 |
| c3mpyr-ntf2-p3 | -53.0 | -42.1 | -3363.3 | -9680.8 | -951.6  | -3246.8 | -2387.5 | -6405.2 | -951.8  | -3247.5 | -2390.7 | -6412.0 |
| c3mpyr-ntf2-p4 | -54.0 | -43.0 | -3363.7 | -9681.3 | -951.7  | -3246.9 | -2387.4 | -6405.1 | -951.8  | -3247.6 | -2390.6 | -6411.9 |
| c3mpyr-ntf2-p5 | -44.2 | -34.1 | -3359.5 | -9674.2 | -951.4  | -3246.6 | -2387.3 | -6404.2 | -951.6  | -3247.3 | -2390.3 | -6410.4 |
| c3mpyr-ntf2-p6 | -43.5 | -33.5 | -3359.7 | -9674.2 | -951.7  | -3246.9 | -2387.4 | -6404.3 | -951.9  | -3247.6 | -2390.4 | -6410.4 |
| c3mpyr-pf6-p1  | -39.5 | -27.5 | -2166.5 | -6532.0 | -951.5  | -3246.7 | -1197.3 | -3263.6 | -951.6  | -3247.3 | -1200.9 | -3271.1 |
| c3mpyr-pf6-p2  | -36.3 | -25.2 | -2165.4 | -6530.5 | -951.7  | -3246.9 | -1197.3 | -3263.7 | -951.9  | -3247.4 | -1200.7 | -3270.7 |
| c3mpyr-pf6-p3  | -36.3 | -25.4 | -2165.1 | -6530.6 | -951.6  | -3246.9 | -1197.3 | -3263.7 | -951.7  | -3247.4 | -1200.6 | -3270.5 |
| c3mpyr-tos-p1  | -45.4 | -31.8 | -2372.8 | -7207.0 | -951.5  | -3247.1 | -1399.2 | -3936.6 | -951.7  | -3247.9 | -1403.3 | -3945.1 |
| c3mpyr-tos-p2  | -41.2 | -28.7 | -2371.4 | -7205.4 | -952.1  | -3247.5 | -1399.2 | -3936.7 | -952.3  | -3248.3 | -1403.0 | -3944.5 |
| c4mim-bf4-p1   | -40.1 | -27.4 | -1899.2 | -5666.4 | -1095.6 | -3484.5 | -785.9  | -2159.4 | -1095.9 | -3485.9 | -789.3  | -2167.0 |
| c4mim-bf4-p2   | -38.7 | -26.7 | -1898.4 | -5665.5 | -1095.5 | -3484.3 | -785.9  | -2159.4 | -1095.9 | -3485.7 | -789.1  | -2166.5 |
| c4mim-br-p1    | -51.8 | -39.8 | -1298.2 | -3945.7 | -1097.0 | -3492.8 | -177.4  | -425.0  | -1097.2 | -3493.5 | -180.6  | -432.8  |
| c4mim-br-p2    | -38.8 | -28.4 | -1293.7 | -3939.6 | -1097.7 | -3494.5 | -177.4  | -425.0  | -1097.8 | -3494.9 | -180.1  | -432.1  |
| c4mim-br-p3    | -44.0 | -32.5 | -1295.7 | -3941.8 | -1097.3 | -3493.9 | -177.4  | -425.0  | -1097.5 | -3494.3 | -180.5  | -432.8  |
| c4mim-br-p4    | -52.5 | -40.3 | -1298.7 | -3946.5 | -1097.2 | -3493.2 | -177.4  | -425.0  | -1097.4 | -3494.0 | -180.6  | -432.9  |
| c4mim-cl-p1    | -42.9 | -32.7 | -1246.9 | -3905.0 | -1096.8 | -3492.5 | -130.4  | -389.2  | -1097.0 | -3493.2 | -132.8  | -396.1  |
| c4mim-cl-p2    | -34.1 | -25.3 | -1244.9 | -3901.7 | -1097.9 | -3495.0 | -130.4  | -389.2  | -1098.0 | -3495.4 | -132.3  | -395.5  |
| c4mim-cl-p3    | -38.4 | -28.5 | -1246.4 | -3903.3 | -1097.5 | -3494.2 | -130.4  | -389.2  | -1097.6 | -3494.7 | -132.7  | -396.2  |
| c4mim-cl-p4    | -42.8 | -32.4 | -1246.8 | -3905.4 | -1097.0 | -3492.9 | -130.4  | -389.2  | -1097.2 | -3493.6 | -132.8  | -396.1  |
| c4mim-dca-p1   | -66.0 | -57.4 | -1749.9 | -5228.8 | -1095.5 | -3484.7 | -624.0  | -1708.6 | -1095.9 | -3486.1 | -625.9  | -1713.3 |



|                |       |       |         |          |         |         |         |         |         |         |         |         |
|----------------|-------|-------|---------|----------|---------|---------|---------|---------|---------|---------|---------|---------|
| c4mim-dca-p2   | -69.4 | -60.3 | -1752.0 | -5230.3  | -1095.6 | -3485.0 | -624.0  | -1708.3 | -1096.0 | -3486.4 | -626.2  | -1713.3 |
| c4mim-dca-p3   | -64.1 | -56.0 | -1748.2 | -5227.1  | -1095.0 | -3484.0 | -623.9  | -1708.3 | -1095.4 | -3485.5 | -625.7  | -1712.8 |
| c4mim-mes-p1   | -58.4 | -42.2 | -1874.3 | -5631.0  | -1096.4 | -3485.9 | -750.3  | -2114.3 | -1096.8 | -3487.3 | -755.0  | -2124.1 |
| c4mim-mes-p2   | -49.9 | -35.3 | -1868.8 | -5625.1  | -1095.2 | -3484.0 | -750.3  | -2114.5 | -1095.5 | -3485.2 | -754.6  | -2123.3 |
| c4mim-pf6-p1   | -46.9 | -32.0 | -2313.5 | -6773.9  | -1095.5 | -3484.6 | -1197.2 | -3263.2 | -1095.8 | -3485.8 | -1201.6 | -3272.2 |
| c4mim-pf6-p2   | -40.0 | -27.5 | -2309.4 | -6769.2  | -1094.8 | -3483.3 | -1197.2 | -3263.3 | -1095.1 | -3484.5 | -1200.9 | -3270.7 |
| c4mim-tos-p1   | -58.5 | -42.5 | -2524.0 | -7452.5  | -1096.3 | -3485.7 | -1399.9 | -3936.0 | -1096.7 | -3487.2 | -1404.5 | -3945.6 |
| c4mim-tos-p2   | -54.1 | -39.5 | -2521.9 | -7449.9  | -1096.2 | -3485.5 | -1399.9 | -3936.0 | -1096.6 | -3487.0 | -1404.0 | -3944.7 |
| c4mpyr-bf4-p1  | -38.6 | -27.0 | -1857.9 | -5780.6  | -1055.0 | -3601.4 | -785.5  | -2158.0 | -1055.2 | -3602.2 | -788.8  | -2165.3 |
| c4mpyr-bf4-p2  | -36.2 | -25.4 | -1857.1 | -5779.7  | -1055.3 | -3601.7 | -785.5  | -2158.0 | -1055.5 | -3602.4 | -788.6  | -2164.9 |
| c4mpyr-bf4-p3  | -36.1 | -25.5 | -1856.8 | -5779.5  | -1055.1 | -3601.7 | -785.5  | -2158.0 | -1055.3 | -3602.3 | -788.5  | -2164.7 |
| c4mpyr-br-p1   | -52.5 | -41.5 | -1257.2 | -4055.7  | -1055.7 | -3602.4 | -177.4  | -425.0  | -1055.8 | -3602.7 | -180.4  | -432.5  |
| c4mpyr-br-p2   | -50.1 | -39.3 | -1255.8 | -4054.6  | -1055.5 | -3602.5 | -177.4  | -425.0  | -1055.6 | -3602.8 | -180.3  | -432.4  |
| c4mpyr-br-p3   | -50.0 | -39.7 | -1255.9 | -4054.5  | -1055.6 | -3602.5 | -177.4  | -425.0  | -1055.7 | -3602.8 | -180.2  | -432.0  |
| c4mpyr-cl-p1   | -45.0 | -36.0 | -1206.7 | -4016.0  | -1055.7 | -3602.4 | -130.4  | -389.2  | -1055.8 | -3602.7 | -132.6  | -395.6  |
| c4mpyr-cl-p2   | -44.4 | -35.5 | -1206.2 | -4016.0  | -1055.5 | -3602.7 | -130.4  | -389.2  | -1055.6 | -3603.0 | -132.5  | -395.6  |
| c4mpyr-cl-p3   | -43.4 | -34.9 | -1205.9 | -4015.3  | -1055.6 | -3602.6 | -130.4  | -389.2  | -1055.7 | -3602.9 | -132.4  | -395.3  |
| c4mpyr-dca-p1  | -45.3 | -39.1 | -1694.4 | -5319.4  | -1055.2 | -3601.5 | -618.1  | -1693.7 | -1055.4 | -3602.3 | -619.7  | -1697.4 |
| c4mpyr-dca-p2  | -47.5 | -40.8 | -1696.1 | -5320.1  | -1055.2 | -3601.8 | -618.1  | -1693.6 | -1055.3 | -3602.5 | -619.9  | -1697.7 |
| c4mpyr-dca-p3  | -46.0 | -39.3 | -1695.6 | -5319.0  | -1055.2 | -3601.7 | -618.2  | -1693.5 | -1055.4 | -3602.4 | -620.0  | -1697.6 |
| c4mpyr-dca-p4  | -46.9 | -40.4 | -1695.4 | -5320.1  | -1055.1 | -3601.7 | -618.1  | -1693.6 | -1055.3 | -3602.5 | -619.8  | -1697.4 |
| c4mpyr-dca-p5  | -48.0 | -41.5 | -1696.1 | -5320.5  | -1055.2 | -3601.7 | -618.1  | -1693.6 | -1055.4 | -3602.4 | -619.8  | -1697.5 |
| c4mpyr-mes-p1  | -48.4 | -34.1 | -1828.3 | -5742.5  | -1055.0 | -3601.6 | -750.3  | -2115.5 | -1055.2 | -3602.4 | -754.6  | -2124.5 |
| c4mpyr-mes-p2  | -44.7 | -31.3 | -1827.2 | -5741.3  | -1055.6 | -3602.2 | -750.3  | -2115.6 | -1055.8 | -3602.9 | -754.4  | -2124.1 |
| c4mpyr-mes-p3  | -43.9 | -31.0 | -1826.5 | -5740.5  | -1055.2 | -3602.1 | -750.3  | -2115.5 | -1055.4 | -3602.8 | -754.1  | -2123.7 |
| c4mpyr-ntf2-p1 | -55.9 | -44.6 | -3468.2 | -10037.2 | -1055.3 | -3601.5 | -2387.5 | -6405.2 | -1055.5 | -3602.4 | -2390.8 | -6412.1 |
| c4mpyr-ntf2-p2 | -47.6 | -36.7 | -3464.7 | -10030.4 | -1055.0 | -3601.2 | -2387.3 | -6403.9 | -1055.2 | -3602.2 | -2390.4 | -6410.5 |
| c4mpyr-ntf2-p3 | -54.3 | -43.2 | -3467.4 | -10036.1 | -1055.1 | -3601.5 | -2387.5 | -6405.2 | -1055.2 | -3602.3 | -2390.7 | -6412.1 |
| c4mpyr-ntf2-p4 | -55.1 | -43.9 | -3467.7 | -10036.6 | -1055.1 | -3601.5 | -2387.5 | -6405.2 | -1055.3 | -3602.2 | -2390.7 | -6412.1 |
| c4mpyr-ntf2-p5 | -44.9 | -34.6 | -3463.2 | -10029.2 | -1054.8 | -3601.2 | -2387.3 | -6404.2 | -1055.0 | -3602.0 | -2390.3 | -6410.5 |
| c4mpyr-ntf2-p6 | -45.1 | -34.8 | -3463.9 | -10029.5 | -1055.2 | -3601.5 | -2387.4 | -6404.2 | -1055.4 | -3602.2 | -2390.4 | -6410.6 |
| c4mpyr-pf6-p1  | -39.6 | -27.5 | -2270.0 | -6886.7  | -1054.9 | -3601.3 | -1197.3 | -3263.7 | -1055.1 | -3601.9 | -1201.0 | -3271.2 |
| c4mpyr-pf6-p2  | -36.7 | -25.5 | -2269.0 | -6885.4  | -1055.2 | -3601.5 | -1197.3 | -3263.7 | -1055.3 | -3602.1 | -1200.7 | -3270.7 |
| c4mpyr-pf6-p3  | -36.5 | -25.6 | -2268.7 | -6885.3  | -1055.1 | -3601.5 | -1197.3 | -3263.7 | -1055.2 | -3602.0 | -1200.7 | -3270.6 |
| c4mpyr-tos-p1  | -45.6 | -32.0 | -2476.4 | -7561.9  | -1055.1 | -3601.7 | -1399.3 | -3936.7 | -1055.3 | -3602.6 | -1403.3 | -3945.1 |
| c4mpyr-tos-p2  | -41.9 | -29.2 | -2475.2 | -7560.5  | -1055.6 | -3602.2 | -1399.3 | -3936.7 | -1055.8 | -3602.9 | -1403.2 | -3944.7 |



## 2.2.18 ACC(T+d) basis set

Table S 19: Raw ACC(T+d) energies. Superscript \* indicates monomer calculated in the dimer basis set.

| ion pair       | E(int) | E(int) CP | E(dimer) SS | E(dimer) OS | E(A) SS | E(A) OS | E(B) SS | E(B) OS | E(A) SS* | E(A) OS* | E(B) SS* | E(B) OS* |
|----------------|--------|-----------|-------------|-------------|---------|---------|---------|---------|----------|----------|----------|----------|
| clmim-bf4-p1   | -37.1  | -30.1     | -1610.5     | -4707.0     | -790.9  | -2459.3 | -803.8  | -2226.4 | -791.3   | -2461.5  | -804.3   | -2230.5  |
| clmim-br-p1    | -58.4  | -42.6     | -1004.9     | -2947.0     | -793.0  | -2467.5 | -186.0  | -447.0  | -793.1   | -2468.4  | -189.9   | -457.9   |
| clmim-br-p2    | -41.2  | -25.7     | -997.1      | -2937.6     | -792.8  | -2467.7 | -186.0  | -447.0  | -792.9   | -2468.3  | -189.7   | -458.1   |
| clmim-cl-p1    | -41.1  | -34.9     | -948.5      | -2898.7     | -792.8  | -2467.2 | -136.8  | -409.3  | -793.0   | -2468.1  | -137.2   | -414.0   |
| clmim-cl-p2    | -29.7  | -23.0     | -944.2      | -2892.9     | -793.0  | -2468.3 | -136.8  | -409.3  | -793.1   | -2468.9  | -137.3   | -414.7   |
| clmim-dca-p1   | -67.0  | -59.8     | -1454.9     | -4243.8     | -791.4  | -2460.7 | -633.3  | -1746.2 | -791.8   | -2463.0  | -633.8   | -1750.2  |
| clmim-dca-p2   | -49.7  | -43.0     | -1447.1     | -4235.3     | -791.5  | -2461.9 | -633.0  | -1746.3 | -791.8   | -2463.6  | -633.5   | -1750.5  |
| clmim-mes-p1   | -49.0  | -40.4     | -1584.0     | -4665.5     | -791.4  | -2460.3 | -770.2  | -2178.6 | -791.8   | -2462.6  | -770.8   | -2183.8  |
| clmim-ntf2-p1  | -80.7  | -66.9     | -3266.7     | -9095.7     | -791.0  | -2459.5 | -2441.5 | -6589.8 | -791.5   | -2463.2  | -2442.6  | -6598.3  |
| clmim-ntf2-p2  | -45.4  | -34.2     | -3251.7     | -9074.9     | -791.3  | -2461.4 | -2440.6 | -6587.9 | -791.6   | -2463.8  | -2441.7  | -6595.2  |
| clmim-ntf2-p3  | -49.9  | -38.6     | -3254.7     | -9076.9     | -791.0  | -2460.4 | -2441.4 | -6588.9 | -791.4   | -2463.2  | -2442.4  | -6595.9  |
| clmim-pf6-p1   | -40.5  | -32.5     | -2037.7     | -5855.2     | -790.9  | -2459.5 | -1229.7 | -3372.3 | -791.3   | -2461.6  | -1230.3  | -3377.3  |
| clmim-tos-p1   | -47.7  | -38.5     | -2238.2     | -6516.0     | -791.1  | -2459.9 | -1425.5 | -4029.9 | -791.5   | -2462.6  | -1426.2  | -4035.4  |
| clmpyr-bf4-p1  | -36.9  | -29.4     | -1569.1     | -4821.6     | -749.8  | -2575.9 | -803.3  | -2224.7 | -750.0   | -2577.5  | -804.0   | -2229.9  |
| clmpyr-bf4-p2  | -33.9  | -26.9     | -1567.8     | -4820.1     | -749.9  | -2576.1 | -803.3  | -2224.7 | -750.1   | -2577.4  | -803.9   | -2229.6  |
| clmpyr-br-p1   | -61.0  | -42.8     | -962.7      | -3058.8     | -750.5  | -2577.0 | -186.0  | -447.0  | -750.6   | -2577.6  | -190.5   | -460.1   |
| clmpyr-br-p2   | -57.9  | -40.6     | -961.3      | -3057.3     | -750.5  | -2577.2 | -186.0  | -447.0  | -750.6   | -2577.7  | -190.3   | -459.5   |
| clmpyr-cl-p1   | -44.0  | -37.2     | -907.1      | -3010.6     | -750.6  | -2577.1 | -136.8  | -409.3  | -750.6   | -2577.7  | -137.3   | -414.9   |
| clmpyr-cl-p2   | -42.5  | -36.0     | -906.4      | -3010.0     | -750.5  | -2577.3 | -136.8  | -409.3  | -750.6   | -2577.8  | -137.3   | -414.8   |
| clmpyr-dca-p1  | -46.6  | -40.6     | -1399.2     | -4333.0     | -750.4  | -2576.7 | -627.3  | -1731.2 | -750.6   | -2578.2  | -627.7   | -1735.1  |
| clmpyr-dca-p2  | -50.7  | -44.5     | -1400.4     | -4335.7     | -750.2  | -2576.4 | -627.2  | -1731.6 | -750.4   | -2577.9  | -627.7   | -1735.6  |
| clmpyr-dca-p3  | -47.8  | -41.0     | -1397.4     | -4335.8     | -749.9  | -2576.1 | -627.2  | -1732.2 | -750.1   | -2577.6  | -627.8   | -1736.7  |
| clmpyr-dca-p4  | -49.1  | -42.8     | -1399.3     | -4334.6     | -749.9  | -2576.1 | -627.3  | -1731.6 | -750.1   | -2577.6  | -627.8   | -1735.6  |
| clmpyr-mes-p1  | -44.8  | -35.8     | -1540.5     | -4780.3     | -749.8  | -2576.2 | -770.2  | -2179.8 | -750.1   | -2578.0  | -771.0   | -2186.0  |
| clmpyr-mes-p2  | -39.2  | -31.1     | -1538.3     | -4777.6     | -750.0  | -2576.6 | -770.2  | -2179.8 | -750.2   | -2578.2  | -770.9   | -2185.5  |
| clmpyr-ntf2-p1 | -56.3  | -44.4     | -3213.3     | -9197.6     | -750.1  | -2576.0 | -2439.8 | -6588.7 | -750.4   | -2578.1  | -2441.0  | -6597.0  |
| clmpyr-ntf2-p2 | -44.1  | -33.8     | -3208.5     | -9188.8     | -749.9  | -2575.7 | -2439.8 | -6587.8 | -750.1   | -2577.7  | -2440.8  | -6594.9  |
| clmpyr-ntf2-p3 | -54.5  | -42.8     | -3212.5     | -9196.4     | -750.1  | -2576.1 | -2439.7 | -6588.4 | -750.4   | -2578.2  | -2440.9  | -6596.6  |
| clmpyr-ntf2-p5 | -45.2  | -35.0     | -3209.2     | -9189.2     | -750.1  | -2576.0 | -2439.7 | -6587.5 | -750.3   | -2577.9  | -2440.6  | -6594.5  |
| clmpyr-pf6-p1  | -38.1  | -29.6     | -1995.6     | -5970.5     | -749.8  | -2575.8 | -1229.8 | -3372.7 | -750.0   | -2577.4  | -1230.5  | -3378.7  |
| clmpyr-pf6-p2  | -35.1  | -27.2     | -1994.4     | -5969.1     | -749.9  | -2576.0 | -1229.8 | -3372.8 | -750.1   | -2577.3  | -1230.5  | -3378.5  |
| clmpyr-tos-p1  | -43.2  | -33.7     | -2194.8     | -6630.5     | -749.8  | -2576.2 | -1425.1 | -4030.8 | -750.1   | -2578.2  | -1425.9  | -4037.3  |
| clmpyr-tos-p2  | -37.7  | -29.0     | -2192.1     | -6627.8     | -750.0  | -2576.4 | -1425.0 | -4030.8 | -750.2   | -2578.0  | -1425.8  | -4036.8  |



|               |       |       |         |         |        |         |         |         |        |         |         |         |
|---------------|-------|-------|---------|---------|--------|---------|---------|---------|--------|---------|---------|---------|
| c2mim-bf4-p1  | -39.7 | -31.8 | -1718.2 | -5070.3 | -897.4 | -2821.3 | -803.8  | -2226.3 | -897.7 | -2823.5 | -804.3  | -2231.1 |
| c2mim-bf4-p2  | -36.8 | -29.5 | -1716.4 | -5068.2 | -896.9 | -2820.6 | -803.8  | -2226.4 | -897.3 | -2822.7 | -804.3  | -2230.7 |
| c2mim-br-p1   | -61.2 | -43.9 | -1111.8 | -3310.3 | -898.9 | -2828.9 | -186.0  | -447.0  | -899.1 | -2829.8 | -190.3  | -459.1  |
| c2mim-br-p2   | -46.2 | -29.4 | -1106.4 | -3303.9 | -899.9 | -2831.1 | -186.0  | -447.0  | -900.0 | -2831.8 | -190.0  | -459.1  |
| c2mim-br-p3   | -46.4 | -29.9 | -1105.8 | -3302.8 | -899.2 | -2830.0 | -186.0  | -447.0  | -899.3 | -2830.7 | -190.0  | -458.7  |
| c2mim-br-p4   | -60.4 | -43.9 | -1112.3 | -3310.9 | -899.6 | -2830.0 | -186.0  | -447.0  | -899.8 | -2830.9 | -190.1  | -458.4  |
| c2mim-cl-p1   | -43.2 | -36.5 | -1055.3 | -3261.6 | -898.9 | -2828.8 | -136.8  | -409.3  | -899.0 | -2829.7 | -137.3  | -414.5  |
| c2mim-cl-p2   | -32.7 | -25.5 | -1052.6 | -3258.1 | -900.2 | -2831.7 | -136.8  | -409.3  | -900.3 | -2832.4 | -137.3  | -415.2  |
| c2mim-cl-p3   | -33.0 | -26.2 | -1052.0 | -3257.1 | -899.4 | -2830.5 | -136.8  | -409.3  | -899.5 | -2831.2 | -137.3  | -414.8  |
| c2mim-cl-p4   | -42.3 | -35.8 | -1055.5 | -3261.9 | -899.4 | -2829.6 | -136.8  | -409.3  | -899.5 | -2830.6 | -137.3  | -414.2  |
| c2mim-dca-p1  | -69.2 | -61.1 | -1561.3 | -4606.7 | -897.3 | -2821.7 | -633.2  | -1746.6 | -897.7 | -2824.2 | -633.8  | -1751.3 |
| c2mim-dca-p2  | -64.9 | -57.3 | -1559.9 | -4604.0 | -897.5 | -2821.8 | -633.3  | -1746.4 | -897.8 | -2824.1 | -633.8  | -1750.8 |
| c2mim-dca-p3  | -69.3 | -61.4 | -1562.5 | -4607.2 | -898.1 | -2822.5 | -633.4  | -1746.4 | -898.4 | -2824.9 | -634.0  | -1750.9 |
| c2mim-dca-p4  | -66.0 | -58.4 | -1560.1 | -4604.5 | -897.4 | -2821.7 | -633.3  | -1746.3 | -897.7 | -2824.1 | -633.8  | -1750.6 |
| c2mim-dca-p5  | -67.4 | -59.9 | -1560.9 | -4605.3 | -897.4 | -2821.8 | -633.4  | -1746.2 | -897.7 | -2824.2 | -633.9  | -1750.5 |
| c2mim-dca-p6  | -67.7 | -60.2 | -1560.7 | -4605.4 | -897.3 | -2821.4 | -633.4  | -1746.3 | -897.6 | -2823.8 | -633.9  | -1750.5 |
| c2mim-mes-p1  | -55.2 | -45.5 | -1693.4 | -5031.2 | -898.2 | -2822.6 | -770.2  | -2178.5 | -898.6 | -2825.1 | -770.9  | -2184.6 |
| c2mim-mes-p2  | -49.9 | -40.8 | -1690.1 | -5027.3 | -897.3 | -2821.3 | -770.2  | -2178.6 | -897.7 | -2823.8 | -770.9  | -2184.2 |
| c2mim-ntf2-p1 | -88.5 | -72.7 | -3376.4 | -9462.3 | -897.5 | -2821.5 | -2441.5 | -6589.8 | -898.1 | -2825.4 | -2442.8 | -6599.8 |
| c2mim-ntf2-p2 | -57.6 | -44.2 | -3363.4 | -9445.0 | -897.7 | -2823.2 | -2441.0 | -6588.9 | -898.2 | -2826.0 | -2442.2 | -6597.8 |
| c2mim-ntf2-p3 | -54.0 | -41.5 | -3362.7 | -9440.8 | -897.3 | -2822.0 | -2441.5 | -6588.8 | -897.7 | -2825.0 | -2442.5 | -6596.7 |
| c2mim-ntf2-p4 | -77.5 | -63.5 | -3372.2 | -9456.0 | -897.4 | -2821.4 | -2441.8 | -6590.1 | -897.9 | -2825.1 | -2443.0 | -6598.8 |
| c2mim-pf6-p1  | -45.2 | -35.9 | -2146.0 | -6219.6 | -897.3 | -2821.2 | -1229.7 | -3372.3 | -897.6 | -2823.5 | -1230.4 | -3378.2 |
| c2mim-pf6-p2  | -41.0 | -32.6 | -2143.7 | -6216.7 | -896.9 | -2820.6 | -1229.7 | -3372.3 | -897.2 | -2822.8 | -1230.3 | -3377.5 |
| c2mim-tos-p1  | -55.8 | -45.2 | -2348.6 | -6882.8 | -898.0 | -2822.3 | -1425.5 | -4029.8 | -898.4 | -2825.2 | -1426.3 | -4036.2 |
| c2mim-tos-p2  | -49.2 | -39.4 | -2345.0 | -6878.3 | -897.3 | -2821.3 | -1425.5 | -4029.9 | -897.7 | -2824.1 | -1426.3 | -4035.7 |
| c2mpyr-bf4-p1 | -37.8 | -29.8 | -1677.5 | -5187.0 | -858.0 | -2940.7 | -803.3  | -2224.7 | -858.2 | -2942.4 | -804.0  | -2230.1 |
| c2mpyr-bf4-p2 | -35.2 | -27.9 | -1677.0 | -5186.0 | -858.5 | -2941.2 | -803.3  | -2224.8 | -858.7 | -2942.8 | -803.9  | -2229.7 |
| c2mpyr-bf4-p3 | -34.9 | -27.5 | -1676.4 | -5185.7 | -858.1 | -2941.0 | -803.3  | -2224.7 | -858.3 | -2942.4 | -804.0  | -2229.9 |
| c2mpyr-br-p1  | -62.7 | -43.7 | -1071.5 | -3424.7 | -858.7 | -2941.8 | -186.0  | -447.0  | -858.7 | -2942.4 | -190.7  | -460.6  |
| c2mpyr-br-p2  | -60.5 | -42.1 | -1070.5 | -3424.0 | -858.6 | -2942.3 | -186.0  | -447.0  | -858.7 | -2942.9 | -190.6  | -460.3  |
| c2mpyr-br-p3  | -59.5 | -41.5 | -1070.0 | -3423.0 | -858.6 | -2941.9 | -186.0  | -447.0  | -858.6 | -2942.4 | -190.4  | -460.0  |
| c2mpyr-cl-p1  | -44.8 | -37.7 | -1015.5 | -3376.0 | -858.7 | -2941.8 | -136.8  | -409.3  | -858.8 | -2942.5 | -137.3  | -415.2  |
| c2mpyr-cl-p2  | -43.5 | -36.6 | -1014.7 | -3375.5 | -858.5 | -2942.1 | -136.8  | -409.3  | -858.5 | -2942.7 | -137.3  | -415.0  |
| c2mpyr-cl-p3  | -43.1 | -36.3 | -1014.7 | -3375.2 | -858.7 | -2942.0 | -136.8  | -409.3  | -858.8 | -2942.6 | -137.3  | -415.0  |
| c2mpyr-dca-p1 | -46.9 | -40.7 | -1507.4 | -4698.0 | -858.5 | -2941.4 | -627.3  | -1731.3 | -858.7 | -2943.0 | -627.8  | -1735.3 |
| c2mpyr-dca-p2 | -50.8 | -44.1 | -1508.5 | -4700.5 | -858.1 | -2941.1 | -627.3  | -1731.6 | -858.4 | -2942.7 | -627.9  | -1735.9 |
| c2mpyr-dca-p3 | -51.3 | -44.8 | -1508.6 | -4700.9 | -858.2 | -2941.1 | -627.3  | -1731.6 | -858.4 | -2942.7 | -627.8  | -1735.8 |
| c2mpyr-mes-p1 | -46.5 | -36.9 | -1649.3 | -5146.4 | -858.0 | -2941.1 | -770.2  | -2179.8 | -858.3 | -2943.0 | -771.0  | -2186.4 |



|                |       |       |         |         |         |         |         |         |         |         |         |         |
|----------------|-------|-------|---------|---------|---------|---------|---------|---------|---------|---------|---------|---------|
| c2mpyr-mes-p2  | -42.7 | -33.8 | -1648.2 | -5144.9 | -858.7  | -2941.6 | -770.2  | -2179.9 | -858.9  | -2943.4 | -771.0  | -2186.0 |
| c2mpyr-mes-p3  | -41.2 | -32.5 | -1647.1 | -5143.8 | -858.2  | -2941.5 | -770.2  | -2179.8 | -858.4  | -2943.2 | -771.0  | -2185.9 |
| c2mpyr-ntf2-p1 | -58.2 | -45.6 | -3322.4 | -9563.7 | -858.3  | -2940.7 | -2440.0 | -6588.9 | -858.7  | -2943.1 | -2441.2 | -6597.5 |
| c2mpyr-ntf2-p2 | -46.9 | -35.8 | -3317.7 | -9555.4 | -858.0  | -2940.5 | -2439.8 | -6587.9 | -858.3  | -2942.7 | -2440.8 | -6595.5 |
| c2mpyr-ntf2-p3 | -56.7 | -44.4 | -3321.6 | -9562.6 | -858.1  | -2940.8 | -2439.9 | -6588.7 | -858.5  | -2943.0 | -2441.1 | -6597.2 |
| c2mpyr-ntf2-p4 | -55.5 | -43.4 | -3321.0 | -9562.1 | -858.1  | -2940.8 | -2439.9 | -6588.8 | -858.4  | -2943.0 | -2441.1 | -6597.2 |
| c2mpyr-ntf2-p5 | -48.4 | -37.4 | -3318.2 | -9555.9 | -857.8  | -2940.5 | -2439.7 | -6587.7 | -858.1  | -2942.7 | -2440.7 | -6595.2 |
| c2mpyr-ntf2-p6 | -45.7 | -35.2 | -3317.6 | -9554.8 | -858.2  | -2940.8 | -2439.8 | -6587.9 | -858.5  | -2942.8 | -2440.8 | -6595.1 |
| c2mpyr-pf6-p1  | -38.6 | -29.8 | -2104.2 | -6335.9 | -858.2  | -2940.9 | -1229.8 | -3372.7 | -858.4  | -2942.6 | -1230.5 | -3378.8 |
| c2mpyr-pf6-p2  | -36.5 | -28.2 | -2103.4 | -6334.8 | -858.2  | -2940.9 | -1229.8 | -3372.8 | -858.4  | -2942.4 | -1230.5 | -3378.6 |
| c2mpyr-pf6-p3  | -36.0 | -27.7 | -2102.9 | -6334.6 | -858.1  | -2940.8 | -1229.8 | -3372.8 | -858.3  | -2942.2 | -1230.6 | -3378.7 |
| c2mpyr-tos-p1  | -45.2 | -35.0 | -2303.6 | -6996.6 | -858.0  | -2941.1 | -1425.1 | -4030.8 | -858.3  | -2943.2 | -1426.0 | -4037.7 |
| c2mpyr-tos-p2  | -41.5 | -32.1 | -2302.5 | -6995.2 | -858.6  | -2941.6 | -1425.1 | -4030.9 | -858.9  | -2943.5 | -1425.9 | -4037.2 |
| c3mim-bf4-p1   | -40.8 | -32.5 | -1823.6 | -5431.7 | -1002.4 | -3182.0 | -803.8  | -2226.4 | -1002.8 | -3184.3 | -804.4  | -2231.4 |
| c3mim-bf4-p2   | -39.6 | -31.7 | -1823.1 | -5431.1 | -1002.4 | -3182.0 | -803.8  | -2226.4 | -1002.8 | -3184.2 | -804.3  | -2231.2 |
| c3mim-br-p1    | -62.5 | -44.5 | -1217.3 | -3672.5 | -1004.0 | -3190.2 | -186.0  | -447.0  | -1004.2 | -3191.1 | -190.5  | -459.5  |
| c3mim-br-p2    | -47.1 | -29.7 | -1211.5 | -3665.6 | -1004.8 | -3192.2 | -186.0  | -447.0  | -1004.9 | -3192.9 | -190.1  | -459.5  |
| c3mim-br-p3    | -52.1 | -34.1 | -1213.5 | -3667.4 | -1004.4 | -3191.4 | -186.0  | -447.0  | -1004.5 | -3192.1 | -190.4  | -459.8  |
| c3mim-br-p4    | -63.0 | -45.2 | -1218.0 | -3673.3 | -1004.3 | -3190.9 | -186.0  | -447.0  | -1004.5 | -3191.9 | -190.4  | -459.3  |
| c3mim-cl-p1    | -43.9 | -36.9 | -1160.6 | -3623.2 | -1003.9 | -3189.9 | -136.8  | -409.3  | -1004.1 | -3190.9 | -137.3  | -414.7  |
| c3mim-cl-p2    | -33.0 | -25.6 | -1157.5 | -3619.4 | -1005.0 | -3192.8 | -136.8  | -409.3  | -1005.1 | -3193.5 | -137.3  | -415.3  |
| c3mim-cl-p3    | -36.6 | -29.4 | -1158.7 | -3620.3 | -1004.6 | -3191.8 | -136.8  | -409.3  | -1004.7 | -3192.6 | -137.3  | -415.1  |
| c3mim-cl-p4    | -43.5 | -36.7 | -1160.7 | -3623.6 | -1004.1 | -3190.5 | -136.8  | -409.3  | -1004.3 | -3191.5 | -137.3  | -414.5  |
| c3mim-dca-p1   | -70.5 | -62.0 | -1666.8 | -4968.1 | -1002.3 | -3182.2 | -633.3  | -1746.6 | -1002.7 | -3184.8 | -633.9  | -1751.5 |
| c3mim-dca-p2   | -71.8 | -63.4 | -1667.7 | -4969.4 | -1002.7 | -3182.9 | -633.3  | -1746.5 | -1003.1 | -3185.5 | -633.9  | -1751.3 |
| c3mim-dca-p3   | -61.2 | -53.0 | -1663.2 | -4964.1 | -1002.8 | -3183.8 | -633.1  | -1746.5 | -1003.1 | -3185.9 | -633.7  | -1751.6 |
| c3mim-dca-p4   | -73.1 | -64.5 | -1668.5 | -4969.2 | -1002.5 | -3182.4 | -633.3  | -1746.3 | -1002.9 | -3185.0 | -633.9  | -1751.3 |
| c3mim-dca-p5   | -69.3 | -61.3 | -1665.7 | -4966.7 | -1001.9 | -3181.7 | -633.2  | -1746.3 | -1002.3 | -3184.2 | -633.7  | -1750.8 |
| c3mim-dca-p6   | -67.9 | -60.4 | -1665.4 | -4966.0 | -1002.0 | -3181.7 | -633.4  | -1746.4 | -1002.3 | -3184.1 | -633.9  | -1750.6 |
| c3mim-mes-p1   | -58.2 | -47.7 | -1799.9 | -5393.9 | -1003.3 | -3183.6 | -770.2  | -2178.5 | -1003.7 | -3186.2 | -771.0  | -2185.1 |
| c3mim-mes-p2   | -50.6 | -41.2 | -1795.1 | -5388.1 | -1002.1 | -3181.6 | -770.2  | -2178.7 | -1002.5 | -3184.2 | -770.9  | -2184.4 |
| c3mim-ntf2-p1  | -92.9 | -75.8 | -3483.2 | -9825.7 | -1002.5 | -3182.1 | -2441.5 | -6589.9 | -1003.1 | -3186.3 | -2443.0 | -6600.7 |
| c3mim-ntf2-p2  | -62.7 | -48.2 | -3470.5 | -9808.5 | -1002.7 | -3183.7 | -2441.0 | -6588.9 | -1003.2 | -3186.7 | -2442.3 | -6598.5 |
| c3mim-ntf2-p3  | -56.3 | -43.1 | -3468.6 | -9802.9 | -1002.2 | -3182.6 | -2441.5 | -6588.8 | -1002.7 | -3185.8 | -2442.6 | -6597.3 |
| c3mim-ntf2-p4  | -79.2 | -65.0 | -3477.3 | -9817.3 | -1002.0 | -3181.3 | -2441.7 | -6590.2 | -1002.6 | -3185.0 | -2442.9 | -6599.0 |
| c3mim-pf6-p1   | -46.2 | -36.9 | -2251.0 | -6580.6 | -1002.2 | -3181.6 | -1229.6 | -3372.1 | -1002.5 | -3184.0 | -1230.3 | -3377.9 |
| c3mim-pf6-p2   | -41.3 | -32.7 | -2248.5 | -6577.3 | -1001.7 | -3180.9 | -1229.7 | -3372.3 | -1002.1 | -3183.2 | -1230.3 | -3377.7 |
| c3mim-tos-p1   | -59.5 | -48.0 | -2455.3 | -7245.8 | -1003.1 | -3183.2 | -1425.5 | -4029.8 | -1003.6 | -3186.3 | -1426.4 | -4036.9 |
| c3mim-tos-p2   | -56.3 | -45.3 | -2453.5 | -7243.7 | -1002.8 | -3182.7 | -1425.5 | -4029.9 | -1003.3 | -3185.7 | -1426.4 | -4036.5 |



|                |       |       |         |         |         |         |         |         |         |         |         |         |
|----------------|-------|-------|---------|---------|---------|---------|---------|---------|---------|---------|---------|---------|
| c3mpyr-bf4-p1  | -38.4 | -30.2 | -1782.7 | -5548.8 | -962.9  | -3302.1 | -803.3  | -2224.7 | -963.2  | -3303.9 | -804.0  | -2230.3 |
| c3mpyr-bf4-p2  | -35.6 | -28.0 | -1781.9 | -5547.5 | -963.3  | -3302.4 | -803.3  | -2224.8 | -963.5  | -3304.0 | -804.0  | -2229.9 |
| c3mpyr-bf4-p3  | -35.5 | -27.8 | -1781.4 | -5547.4 | -963.0  | -3302.3 | -803.3  | -2224.7 | -963.2  | -3303.9 | -804.0  | -2230.0 |
| c3mpyr-br-p1   | -64.1 | -44.5 | -1177.0 | -3787.0 | -963.6  | -3303.2 | -186.0  | -447.0  | -963.7  | -3303.8 | -190.8  | -461.1  |
| c3mpyr-br-p2   | -60.5 | -41.9 | -1175.3 | -3785.0 | -963.5  | -3303.2 | -186.0  | -447.0  | -963.6  | -3303.9 | -190.6  | -460.4  |
| c3mpyr-br-p3   | -60.8 | -42.2 | -1175.5 | -3785.3 | -963.5  | -3303.3 | -186.0  | -447.0  | -963.6  | -3303.9 | -190.6  | -460.4  |
| c3mpyr-cl-p1   | -45.4 | -38.1 | -1120.6 | -3737.8 | -963.7  | -3303.2 | -136.8  | -409.3  | -963.7  | -3303.9 | -137.3  | -415.3  |
| c3mpyr-cl-p2   | -43.9 | -36.8 | -1119.8 | -3737.0 | -963.4  | -3303.4 | -136.8  | -409.3  | -963.5  | -3304.0 | -137.3  | -415.1  |
| c3mpyr-cl-p3   | -43.6 | -36.6 | -1119.8 | -3736.9 | -963.6  | -3303.4 | -136.8  | -409.3  | -963.7  | -3304.0 | -137.3  | -415.1  |
| c3mpyr-dca-p1  | -48.4 | -41.9 | -1612.7 | -5060.2 | -963.2  | -3302.5 | -627.4  | -1731.5 | -963.4  | -3304.2 | -627.8  | -1735.6 |
| c3mpyr-dca-p2  | -50.9 | -44.1 | -1613.4 | -5061.9 | -963.1  | -3302.5 | -627.3  | -1731.6 | -963.3  | -3304.1 | -627.9  | -1736.0 |
| c3mpyr-dca-p3  | -46.8 | -39.9 | -1610.3 | -5062.0 | -963.2  | -3302.5 | -627.4  | -1732.5 | -963.4  | -3304.1 | -628.0  | -1737.0 |
| c3mpyr-dca-p4  | -49.4 | -42.9 | -1612.7 | -5061.3 | -963.3  | -3302.6 | -627.2  | -1731.5 | -963.5  | -3304.2 | -627.7  | -1735.7 |
| c3mpyr-dca-p5  | -51.4 | -44.8 | -1613.5 | -5062.3 | -963.1  | -3302.5 | -627.3  | -1731.6 | -963.3  | -3304.1 | -627.8  | -1735.8 |
| c3mpyr-mes-p1  | -47.6 | -37.7 | -1754.6 | -5508.5 | -962.9  | -3302.4 | -770.2  | -2179.8 | -963.2  | -3304.4 | -771.0  | -2186.6 |
| c3mpyr-mes-p2  | -43.2 | -34.0 | -1753.2 | -5506.6 | -963.6  | -3302.9 | -770.2  | -2179.9 | -963.8  | -3304.7 | -771.0  | -2186.2 |
| c3mpyr-mes-p3  | -42.4 | -33.3 | -1752.5 | -5505.9 | -963.1  | -3302.8 | -770.2  | -2179.8 | -963.4  | -3304.7 | -771.0  | -2186.1 |
| c3mpyr-ntf2-p1 | -60.8 | -47.5 | -3428.4 | -9926.8 | -963.3  | -3302.3 | -2440.0 | -6588.8 | -963.7  | -3304.8 | -2441.2 | -6598.0 |
| c3mpyr-ntf2-p2 | -46.9 | -35.7 | -3422.9 | -9916.6 | -963.0  | -3302.0 | -2439.8 | -6587.8 | -963.3  | -3304.2 | -2440.8 | -6595.5 |
| c3mpyr-ntf2-p3 | -57.3 | -44.6 | -3426.7 | -9924.4 | -963.0  | -3302.1 | -2439.9 | -6588.8 | -963.3  | -3304.4 | -2441.2 | -6597.5 |
| c3mpyr-ntf2-p4 | -58.2 | -45.4 | -3427.0 | -9924.9 | -963.1  | -3302.2 | -2439.9 | -6588.6 | -963.4  | -3304.6 | -2441.1 | -6597.5 |
| c3mpyr-ntf2-p5 | -48.6 | -37.3 | -3423.1 | -9917.4 | -962.7  | -3301.8 | -2439.7 | -6587.7 | -963.1  | -3304.1 | -2440.7 | -6595.3 |
| c3mpyr-ntf2-p6 | -47.8 | -36.7 | -3423.3 | -9917.4 | -963.1  | -3302.2 | -2439.8 | -6587.8 | -963.4  | -3304.3 | -2440.8 | -6595.4 |
| c3mpyr-pf6-p1  | -40.2 | -30.9 | -2209.4 | -6698.1 | -962.8  | -3302.0 | -1229.8 | -3372.7 | -963.1  | -3303.7 | -1230.6 | -3379.2 |
| c3mpyr-pf6-p2  | -36.6 | -28.1 | -2208.2 | -6696.2 | -963.1  | -3302.2 | -1229.8 | -3372.7 | -963.3  | -3303.8 | -1230.5 | -3378.7 |
| c3mpyr-pf6-p3  | -36.8 | -28.2 | -2208.0 | -6696.5 | -962.9  | -3302.1 | -1229.8 | -3372.8 | -963.2  | -3303.6 | -1230.6 | -3378.9 |
| c3mpyr-tos-p1  | -46.5 | -35.9 | -2408.9 | -7358.9 | -962.9  | -3302.4 | -1425.1 | -4030.8 | -963.2  | -3304.6 | -1426.0 | -4038.0 |
| c3mpyr-tos-p2  | -42.0 | -32.3 | -2407.5 | -7356.9 | -963.5  | -3302.9 | -1425.1 | -4030.9 | -963.8  | -3304.9 | -1425.9 | -4037.4 |
| c4mim-bf4-p1   | -41.5 | -32.9 | -1928.8 | -5792.8 | -1107.3 | -3542.7 | -803.8  | -2226.3 | -1107.7 | -3544.9 | -804.4  | -2231.6 |
| c4mim-bf4-p2   | -39.9 | -31.8 | -1928.0 | -5791.8 | -1107.3 | -3542.5 | -803.8  | -2226.4 | -1107.6 | -3544.7 | -804.4  | -2231.3 |
| c4mim-br-p1    | -64.1 | -45.4 | -1322.8 | -4034.6 | -1108.9 | -3551.4 | -186.0  | -447.0  | -1109.0 | -3552.4 | -190.6  | -460.0  |
| c4mim-br-p2    | -48.6 | -30.7 | -1317.0 | -4027.7 | -1109.7 | -3553.4 | -186.0  | -447.0  | -1109.8 | -3554.1 | -190.3  | -459.9  |
| c4mim-br-p3    | -54.7 | -35.8 | -1319.5 | -4030.2 | -1109.3 | -3552.6 | -186.0  | -447.0  | -1109.4 | -3553.4 | -190.7  | -460.4  |
| c4mim-br-p4    | -64.1 | -45.7 | -1323.2 | -4035.0 | -1109.1 | -3551.9 | -186.0  | -447.0  | -1109.3 | -3552.9 | -190.6  | -459.7  |
| c4mim-cl-p1    | -44.7 | -37.5 | -1265.7 | -3984.9 | -1108.7 | -3551.1 | -136.8  | -409.3  | -1108.9 | -3552.1 | -137.3  | -414.8  |
| c4mim-cl-p2    | -33.7 | -26.2 | -1262.7 | -3981.0 | -1109.9 | -3554.0 | -136.8  | -409.3  | -1110.0 | -3554.7 | -137.4  | -415.4  |
| c4mim-cl-p3    | -38.1 | -30.6 | -1264.2 | -3982.4 | -1109.4 | -3553.0 | -136.8  | -409.3  | -1109.5 | -3553.8 | -137.3  | -415.3  |
| c4mim-cl-p4    | -44.0 | -37.1 | -1265.6 | -3985.0 | -1108.9 | -3551.6 | -136.8  | -409.3  | -1109.1 | -3552.6 | -137.3  | -414.6  |
| c4mim-dca-p1   | -71.4 | -62.6 | -1772.0 | -5329.3 | -1107.2 | -3542.8 | -633.3  | -1746.7 | -1107.6 | -3545.4 | -633.9  | -1751.7 |



|                |       |       |         |          |         |         |         |         |         |         |         |         |
|----------------|-------|-------|---------|----------|---------|---------|---------|---------|---------|---------|---------|---------|
| c4mim-dca-p2   | -75.0 | -66.0 | -1774.2 | -5331.0  | -1107.4 | -3543.1 | -633.3  | -1746.3 | -1107.8 | -3545.8 | -634.0  | -1751.6 |
| c4mim-dca-p3   | -69.6 | -61.6 | -1770.6 | -5327.5  | -1106.7 | -3542.2 | -633.2  | -1746.4 | -1107.1 | -3544.7 | -633.7  | -1750.9 |
| c4mim-mes-p1   | -59.7 | -48.8 | -1905.4 | -5755.4  | -1108.2 | -3544.1 | -770.2  | -2178.6 | -1108.6 | -3546.9 | -771.1  | -2185.4 |
| c4mim-mes-p2   | -50.8 | -41.3 | -1899.8 | -5748.7  | -1106.9 | -3542.0 | -770.2  | -2178.7 | -1107.3 | -3544.6 | -770.9  | -2184.5 |
| c4mim-pf6-p1   | -48.7 | -38.4 | -2357.4 | -6943.2  | -1107.3 | -3542.7 | -1229.7 | -3372.3 | -1107.6 | -3545.1 | -1230.5 | -3379.0 |
| c4mim-pf6-p2   | -41.4 | -32.7 | -2353.3 | -6937.9  | -1106.5 | -3541.4 | -1229.7 | -3372.3 | -1106.9 | -3543.6 | -1230.3 | -3377.7 |
| c4mim-tos-p1   | -62.2 | -50.0 | -2561.3 | -7608.1  | -1108.0 | -3543.9 | -1425.5 | -4029.8 | -1108.5 | -3547.1 | -1426.5 | -4037.3 |
| c4mim-tos-p2   | -57.3 | -46.3 | -2559.3 | -7605.1  | -1108.0 | -3543.7 | -1425.5 | -4029.9 | -1108.4 | -3546.7 | -1426.4 | -4036.6 |
| c4mpyr-bf4-p1  | -38.6 | -30.3 | -1887.5 | -5909.9  | -1067.7 | -3663.0 | -803.3  | -2224.7 | -1067.9 | -3664.8 | -804.0  | -2230.4 |
| c4mpyr-bf4-p2  | -35.8 | -28.2 | -1886.7 | -5908.6  | -1068.0 | -3663.3 | -803.3  | -2224.8 | -1068.2 | -3664.9 | -804.0  | -2230.0 |
| c4mpyr-bf4-p3  | -35.8 | -28.0 | -1886.3 | -5908.6  | -1067.8 | -3663.2 | -803.3  | -2224.8 | -1068.0 | -3664.8 | -804.0  | -2230.1 |
| c4mpyr-br-p1   | -64.6 | -44.7 | -1281.9 | -4148.2  | -1068.4 | -3664.0 | -186.0  | -447.0  | -1068.5 | -3664.7 | -190.9  | -461.3  |
| c4mpyr-br-p2   | -61.2 | -42.1 | -1280.2 | -4146.4  | -1068.2 | -3664.1 | -186.0  | -447.0  | -1068.3 | -3664.8 | -190.7  | -460.7  |
| c4mpyr-br-p3   | -61.4 | -42.5 | -1280.4 | -4146.5  | -1068.3 | -3664.2 | -186.0  | -447.0  | -1068.4 | -3664.8 | -190.7  | -460.6  |
| c4mpyr-cl-p1   | -45.5 | -38.1 | -1225.3 | -4098.7  | -1068.4 | -3664.1 | -136.8  | -409.3  | -1068.5 | -3664.7 | -137.4  | -415.3  |
| c4mpyr-cl-p2   | -44.6 | -37.3 | -1224.8 | -4098.5  | -1068.2 | -3664.4 | -136.8  | -409.3  | -1068.3 | -3665.1 | -137.3  | -415.3  |
| c4mpyr-cl-p3   | -43.6 | -36.6 | -1224.5 | -4097.9  | -1068.4 | -3664.2 | -136.8  | -409.3  | -1068.4 | -3664.8 | -137.3  | -415.1  |
| c4mpyr-dca-p1  | -48.9 | -42.0 | -1716.6 | -5422.2  | -1067.9 | -3663.1 | -627.3  | -1731.7 | -1068.1 | -3664.8 | -627.8  | -1736.1 |
| c4mpyr-dca-p2  | -50.9 | -44.0 | -1718.2 | -5423.0  | -1067.9 | -3663.4 | -627.3  | -1731.6 | -1068.1 | -3665.1 | -627.9  | -1736.1 |
| c4mpyr-dca-p3  | -49.4 | -42.7 | -1717.7 | -5421.7  | -1067.9 | -3663.3 | -627.3  | -1731.5 | -1068.1 | -3665.0 | -627.8  | -1735.7 |
| c4mpyr-dca-p4  | -50.5 | -43.4 | -1717.5 | -5423.0  | -1067.8 | -3663.4 | -627.3  | -1731.6 | -1068.1 | -3665.1 | -627.8  | -1736.1 |
| c4mpyr-dca-p5  | -51.6 | -44.9 | -1718.3 | -5423.4  | -1067.9 | -3663.3 | -627.3  | -1731.6 | -1068.1 | -3665.0 | -627.8  | -1735.9 |
| c4mpyr-mes-p1  | -47.8 | -37.7 | -1859.3 | -5869.5  | -1067.7 | -3663.3 | -770.2  | -2179.8 | -1068.0 | -3665.3 | -771.1  | -2186.7 |
| c4mpyr-mes-p2  | -43.8 | -34.5 | -1858.2 | -5867.9  | -1068.3 | -3663.9 | -770.2  | -2179.9 | -1068.6 | -3665.7 | -771.0  | -2186.3 |
| c4mpyr-mes-p3  | -42.8 | -33.5 | -1857.4 | -5867.1  | -1067.9 | -3663.8 | -770.2  | -2179.8 | -1068.2 | -3665.6 | -771.0  | -2186.2 |
| c4mpyr-ntf2-p1 | -61.1 | -47.5 | -3533.1 | -10287.9 | -1068.0 | -3663.1 | -2439.9 | -6588.8 | -1068.4 | -3665.7 | -2441.3 | -6598.1 |
| c4mpyr-ntf2-p2 | -52.7 | -40.2 | -3529.7 | -10280.7 | -1067.7 | -3662.8 | -2439.7 | -6587.4 | -1068.0 | -3665.3 | -2440.8 | -6596.0 |
| c4mpyr-ntf2-p3 | -58.8 | -45.8 | -3532.1 | -10286.3 | -1067.7 | -3663.1 | -2439.9 | -6588.8 | -1068.1 | -3665.5 | -2441.2 | -6597.8 |
| c4mpyr-ntf2-p4 | -59.6 | -46.3 | -3532.3 | -10286.8 | -1067.8 | -3663.1 | -2439.9 | -6588.7 | -1068.2 | -3665.5 | -2441.2 | -6597.9 |
| c4mpyr-ntf2-p5 | -49.4 | -37.9 | -3528.1 | -10278.9 | -1067.5 | -3662.8 | -2439.7 | -6587.6 | -1067.8 | -3665.1 | -2440.7 | -6595.5 |
| c4mpyr-ntf2-p6 | -49.7 | -38.1 | -3528.8 | -10279.4 | -1067.9 | -3663.1 | -2439.8 | -6587.7 | -1068.2 | -3665.3 | -2440.8 | -6595.7 |
| c4mpyr-pf6-p1  | -40.5 | -30.9 | -2314.2 | -7059.3  | -1067.6 | -3662.9 | -1229.8 | -3372.7 | -1067.9 | -3664.6 | -1230.6 | -3379.4 |
| c4mpyr-pf6-p2  | -37.2 | -28.5 | -2313.2 | -7057.6  | -1067.9 | -3663.1 | -1229.8 | -3372.7 | -1068.1 | -3664.7 | -1230.6 | -3378.9 |
| c4mpyr-pf6-p3  | -37.2 | -28.4 | -2312.9 | -7057.7  | -1067.7 | -3663.1 | -1229.8 | -3372.8 | -1067.9 | -3664.6 | -1230.6 | -3379.1 |
| c4mpyr-tos-p1  | -46.9 | -36.1 | -2513.8 | -7720.1  | -1067.8 | -3663.4 | -1425.1 | -4030.8 | -1068.1 | -3665.6 | -1426.0 | -4038.1 |
| c4mpyr-tos-p2  | -42.8 | -32.9 | -2512.6 | -7718.4  | -1068.3 | -3663.8 | -1425.1 | -4030.8 | -1068.6 | -3665.9 | -1426.0 | -4037.6 |



## 2.3 CBS extrapolated MP2

### 2.3.1 D→T

Table S 20: Raw CBS (D→T) energies. Superscript \* indicates monomer calculated in the dimer basis set.

| ion pair       | E(int) | E(int) CP | E(dimer) SS | E(dimer) OS | E(A) SS | E(A) OS | E(B) SS | E(B) OS | E(A) SS* | E(A) OS* | E(B) SS* | E(B) OS* |
|----------------|--------|-----------|-------------|-------------|---------|---------|---------|---------|----------|----------|----------|----------|
| clmim-bf4-p1   | -37.1  | -29.6     | -1707.0     | -5035.3     | -830.8  | -2615.0 | -859.4  | -2400.0 | -831.0   | -2616.0  | -861.3   | -2404.4  |
| clmim-br-p1    | -53.3  | -43.9     | -1067.1     | -3154.2     | -832.5  | -2621.9 | -209.5  | -504.1  | -832.6   | -2622.4  | -212.2   | -510.2   |
| clmim-br-p2    | -37.4  | -28.8     | -1059.7     | -3145.1     | -832.3  | -2621.6 | -209.5  | -504.1  | -832.3   | -2621.9  | -211.8   | -510.0   |
| clmim-cl-p1    | -43.1  | -36.6     | -996.4      | -3086.8     | -832.4  | -2621.6 | -143.7  | -442.5  | -832.4   | -2622.0  | -145.2   | -447.0   |
| clmim-cl-p2    | -33.4  | -27.5     | -992.7      | -3081.6     | -832.5  | -2622.1 | -143.7  | -442.5  | -832.5   | -2622.4  | -144.9   | -446.9   |
| clmim-dca-p1   | -65.3  | -60.1     | -1524.0     | -4499.8     | -831.3  | -2616.2 | -662.1  | -1848.9 | -831.3   | -2617.1  | -663.3   | -1852.1  |
| clmim-dca-p2   | -49.2  | -44.7     | -1516.6     | -4491.9     | -831.3  | -2617.2 | -661.8  | -1848.9 | -831.4   | -2617.7  | -662.7   | -1851.9  |
| clmim-mes-p1   | -50.5  | -41.0     | -1665.0     | -4962.3     | -831.3  | -2615.9 | -809.4  | -2320.2 | -831.4   | -2616.7  | -812.1   | -2326.0  |
| clmim-ntf2-p1  | -76.8  | -67.2     | -3452.5     | -9713.9     | -830.8  | -2615.1 | -2586.4 | -7057.3 | -831.0   | -2616.5  | -2588.7  | -7062.9  |
| clmim-ntf2-p2  | -43.8  | -36.8     | -3437.7     | -9695.0     | -831.1  | -2616.7 | -2585.6 | -7055.6 | -831.1   | -2617.3  | -2587.3  | -7060.2  |
| clmim-ntf2-p3  | -46.8  | -39.8     | -3440.3     | -9695.9     | -830.8  | -2615.8 | -2586.4 | -7056.3 | -831.0   | -2616.8  | -2588.1  | -7060.5  |
| clmim-pf6-p1   | -40.5  | -32.0     | -2162.1     | -6267.8     | -830.8  | -2615.1 | -1312.9 | -3630.7 | -830.9   | -2616.0  | -1315.4  | -3635.7  |
| clmim-tos-p1   | -47.5  | -38.9     | -2348.1     | -6924.0     | -830.9  | -2615.6 | -1494.2 | -4283.9 | -831.1   | -2616.4  | -1496.6  | -4289.2  |
| clmpyr-bf4-p1  | -37.8  | -30.5     | -1664.0     | -5154.1     | -787.3  | -2735.4 | -859.0  | -2398.5 | -787.4   | -2736.0  | -861.0   | -2403.1  |
| clmpyr-bf4-p2  | -35.0  | -28.3     | -1662.7     | -5152.8     | -787.5  | -2735.6 | -859.0  | -2398.5 | -787.5   | -2736.0  | -860.9   | -2402.8  |
| clmpyr-br-p1   | -55.0  | -45.6     | -1023.1     | -3269.9     | -788.0  | -2736.4 | -209.5  | -504.1  | -788.0   | -2736.6  | -212.2   | -510.5   |
| clmpyr-br-p2   | -52.3  | -43.5     | -1021.7     | -3268.7     | -788.0  | -2736.6 | -209.5  | -504.1  | -788.0   | -2736.7  | -212.0   | -510.1   |
| clmpyr-cl-p1   | -47.3  | -40.8     | -953.9      | -3204.1     | -788.1  | -2736.4 | -143.7  | -442.5  | -788.1   | -2736.6  | -145.3   | -447.2   |
| clmpyr-cl-p2   | -46.0  | -39.8     | -953.2      | -3203.6     | -788.0  | -2736.6 | -143.7  | -442.5  | -788.0   | -2736.7  | -145.2   | -447.0   |
| clmpyr-dca-p1  | -45.9  | -41.6     | -1466.8     | -4594.4     | -787.9  | -2736.1 | -656.5  | -1834.8 | -787.9   | -2736.5  | -657.6   | -1837.6  |
| clmpyr-dca-p2  | -49.1  | -45.2     | -1467.7     | -4596.5     | -787.7  | -2735.9 | -656.4  | -1835.1 | -787.7   | -2736.3  | -657.4   | -1837.6  |
| clmpyr-dca-p3  | -46.8  | -42.6     | -1464.9     | -4596.9     | -787.4  | -2735.6 | -656.4  | -1835.7 | -787.4   | -2736.1  | -657.2   | -1838.4  |
| clmpyr-dca-p4  | -47.8  | -43.7     | -1466.8     | -4595.6     | -787.4  | -2735.6 | -656.4  | -1835.1 | -787.4   | -2736.1  | -657.5   | -1837.7  |
| clmpyr-mes-p1  | -47.0  | -38.2     | -1619.6     | -5080.8     | -787.3  | -2735.7 | -809.3  | -2321.1 | -787.4   | -2736.2  | -811.8   | -2326.8  |
| clmpyr-mes-p2  | -41.8  | -34.1     | -1617.3     | -5078.4     | -787.5  | -2736.0 | -809.3  | -2321.1 | -787.5   | -2736.3  | -811.5   | -2326.3  |
| clmpyr-ntf2-p1 | -52.6  | -45.9     | -3396.7     | -9820.0     | -787.7  | -2735.5 | -2584.7 | -7056.2 | -787.7   | -2736.2  | -2586.5  | -7060.4  |
| clmpyr-ntf2-p2 | -40.3  | -34.9     | -3391.5     | -9811.2     | -787.4  | -2735.3 | -2584.6 | -7055.1 | -787.5   | -2735.8  | -2586.0  | -7058.4  |
| clmpyr-ntf2-p3 | -51.4  | -44.8     | -3396.1     | -9819.1     | -787.6  | -2735.6 | -2584.6 | -7055.9 | -787.7   | -2736.1  | -2586.3  | -7060.2  |
| clmpyr-ntf2-p5 | -41.3  | -36.1     | -3392.1     | -9811.6     | -787.6  | -2735.5 | -2584.5 | -7054.8 | -787.7   | -2736.0  | -2585.8  | -7058.0  |
| clmpyr-pf6-p1  | -37.8  | -30.5     | -2118.0     | -6386.6     | -787.3  | -2735.4 | -1313.0 | -3631.0 | -787.4   | -2735.9  | -1315.2  | -3635.6  |
| clmpyr-pf6-p2  | -34.8  | -28.3     | -2116.7     | -6385.3     | -787.4  | -2735.5 | -1313.0 | -3631.2 | -787.5   | -2735.8  | -1315.1  | -3635.3  |
| clmpyr-tos-p1  | -43.9  | -35.7     | -2302.7     | -7041.9     | -787.3  | -2735.7 | -1493.5 | -4284.2 | -787.4   | -2736.3  | -1495.8  | -4289.4  |



|               |       |       |         |          |        |         |         |         |        |         |         |         |
|---------------|-------|-------|---------|----------|--------|---------|---------|---------|--------|---------|---------|---------|
| c1mpyr-tos-p2 | -38.7 | -31.2 | -2299.9 | -7039.6  | -787.5 | -2735.8 | -1493.4 | -4284.2 | -787.5 | -2736.2 | -1495.6 | -4289.0 |
| c2mim-bf4-p1  | -39.5 | -31.5 | -1819.8 | -5420.1  | -942.3 | -2998.8 | -859.4  | -2400.0 | -942.5 | -2999.8 | -861.5  | -2404.8 |
| c2mim-bf4-p2  | -36.7 | -29.2 | -1818.0 | -5418.2  | -941.9 | -2998.1 | -859.4  | -2400.0 | -942.1 | -2999.1 | -861.3  | -2404.4 |
| c2mim-br-p1   | -55.3 | -45.4 | -1178.9 | -3538.4  | -943.5 | -3004.8 | -209.5  | -504.1  | -943.6 | -3005.3 | -212.4  | -510.6  |
| c2mim-br-p2   | -41.4 | -32.3 | -1174.0 | -3532.2  | -944.6 | -3006.6 | -209.5  | -504.1  | -944.6 | -3006.9 | -212.0  | -510.4  |
| c2mim-br-p3   | -41.9 | -32.7 | -1173.4 | -3531.6  | -943.7 | -3005.6 | -209.5  | -504.1  | -943.8 | -3005.9 | -212.1  | -510.4  |
| c2mim-br-p4   | -54.9 | -45.4 | -1179.6 | -3539.3  | -944.3 | -3006.1 | -209.5  | -504.1  | -944.3 | -3006.6 | -212.2  | -510.4  |
| c2mim-cl-p1   | -45.4 | -38.3 | -1108.5 | -3471.2  | -943.5 | -3004.7 | -143.7  | -442.5  | -943.5 | -3005.2 | -145.4  | -447.3  |
| c2mim-cl-p2   | -36.0 | -29.7 | -1106.2 | -3467.9  | -944.8 | -3007.1 | -143.7  | -442.5  | -944.8 | -3007.4 | -145.0  | -447.1  |
| c2mim-cl-p3   | -36.8 | -30.2 | -1105.6 | -3467.3  | -944.0 | -3006.1 | -143.7  | -442.5  | -944.0 | -3006.4 | -145.1  | -447.2  |
| c2mim-cl-p4   | -44.3 | -37.6 | -1108.6 | -3471.6  | -944.0 | -3005.7 | -143.7  | -442.5  | -944.1 | -3006.1 | -145.3  | -447.1  |
| c2mim-dca-p1  | -67.2 | -61.5 | -1635.6 | -4884.0  | -942.2 | -2999.0 | -662.0  | -1849.2 | -942.3 | -2999.9 | -663.2  | -1852.7 |
| c2mim-dca-p2  | -63.1 | -57.7 | -1634.2 | -4881.5  | -942.4 | -2999.1 | -662.0  | -1849.1 | -942.5 | -2999.9 | -663.2  | -1852.3 |
| c2mim-dca-p3  | -67.5 | -61.9 | -1636.9 | -4884.7  | -943.0 | -2999.8 | -662.2  | -1849.1 | -943.1 | -3000.7 | -663.4  | -1852.4 |
| c2mim-dca-p4  | -63.9 | -58.6 | -1634.3 | -4882.0  | -942.3 | -2999.1 | -662.0  | -1849.0 | -942.4 | -2999.9 | -663.2  | -1852.2 |
| c2mim-dca-p5  | -65.6 | -60.2 | -1635.2 | -4883.0  | -942.3 | -2999.2 | -662.1  | -1848.9 | -942.4 | -3000.1 | -663.3  | -1852.2 |
| c2mim-dca-p6  | -65.8 | -60.4 | -1634.9 | -4883.1  | -942.2 | -2998.8 | -662.1  | -1849.0 | -942.3 | -2999.7 | -663.3  | -1852.3 |
| c2mim-mes-p1  | -56.6 | -46.4 | -1779.6 | -5349.4  | -943.1 | -2999.9 | -809.3  | -2320.1 | -943.3 | -3000.9 | -812.1  | -2326.3 |
| c2mim-mes-p2  | -51.2 | -41.4 | -1776.1 | -5345.7  | -942.3 | -2998.8 | -809.4  | -2320.2 | -942.4 | -2999.7 | -812.2  | -2326.2 |
| c2mim-ntf2-p1 | -83.8 | -73.0 | -3567.4 | -10101.4 | -942.4 | -2998.9 | -2586.4 | -7057.3 | -942.7 | -3000.3 | -2589.0 | -7063.6 |
| c2mim-ntf2-p2 | -54.3 | -46.4 | -3554.3 | -10085.3 | -942.6 | -3000.3 | -2585.9 | -7056.5 | -942.7 | -3001.1 | -2587.8 | -7061.5 |
| c2mim-ntf2-p3 | -50.2 | -42.8 | -3553.4 | -10080.9 | -942.1 | -2999.2 | -2586.4 | -7056.3 | -942.4 | -3000.3 | -2588.2 | -7060.6 |
| c2mim-ntf2-p4 | -74.1 | -64.1 | -3563.3 | -10096.2 | -942.3 | -2998.9 | -2586.7 | -7057.5 | -942.6 | -3000.2 | -2589.2 | -7063.4 |
| c2mim-pf6-p1  | -44.7 | -35.4 | -2275.7 | -6653.5  | -942.2 | -2998.7 | -1312.9 | -3630.7 | -942.4 | -2999.6 | -1315.6 | -3636.2 |
| c2mim-pf6-p2  | -40.8 | -32.1 | -2273.2 | -6651.0  | -941.8 | -2998.0 | -1312.9 | -3630.7 | -942.0 | -2998.9 | -1315.4 | -3635.8 |
| c2mim-tos-p1  | -55.6 | -45.8 | -2464.0 | -7312.2  | -943.0 | -2999.7 | -1494.1 | -4283.8 | -943.1 | -3000.7 | -1496.8 | -4289.7 |
| c2mim-tos-p2  | -49.1 | -39.8 | -2460.2 | -7308.0  | -942.3 | -2998.8 | -1494.2 | -4283.9 | -942.4 | -2999.8 | -1496.8 | -4289.5 |
| c2mpyr-bf4-p1 | -38.5 | -30.9 | -1777.6 | -5541.0  | -900.7 | -3121.9 | -859.0  | -2398.5 | -900.7 | -3122.5 | -861.1  | -2403.2 |
| c2mpyr-bf4-p2 | -36.1 | -29.0 | -1777.0 | -5540.2  | -901.2 | -3122.4 | -859.0  | -2398.6 | -901.2 | -3122.8 | -861.0  | -2403.1 |
| c2mpyr-bf4-p3 | -35.9 | -29.0 | -1776.5 | -5539.9  | -900.8 | -3122.1 | -859.0  | -2398.5 | -900.8 | -3122.6 | -861.0  | -2403.0 |
| c2mpyr-br-p1  | -56.0 | -46.4 | -1136.8 | -3656.9  | -901.3 | -3122.8 | -209.5  | -504.1  | -901.3 | -3123.0 | -212.3  | -510.7  |
| c2mpyr-br-p2  | -54.2 | -44.8 | -1136.0 | -3656.4  | -901.3 | -3123.3 | -209.5  | -504.1  | -901.3 | -3123.5 | -212.2  | -510.6  |
| c2mpyr-br-p3  | -53.3 | -44.3 | -1135.4 | -3655.6  | -901.2 | -3122.9 | -209.5  | -504.1  | -901.2 | -3123.1 | -212.1  | -510.3  |
| c2mpyr-cl-p1  | -47.8 | -41.2 | -1067.4 | -3590.9  | -901.4 | -3122.8 | -143.7  | -442.5  | -901.4 | -3123.0 | -145.3  | -447.3  |
| c2mpyr-cl-p2  | -46.7 | -40.1 | -1066.5 | -3590.4  | -901.1 | -3123.0 | -143.7  | -442.5  | -901.1 | -3123.2 | -145.3  | -447.3  |
| c2mpyr-cl-p3  | -46.3 | -40.0 | -1066.6 | -3590.2  | -901.3 | -3123.0 | -143.7  | -442.5  | -901.4 | -3123.1 | -145.2  | -447.1  |
| c2mpyr-dca-p1 | -46.0 | -41.6 | -1580.1 | -4980.8  | -901.1 | -3122.5 | -656.5  | -1834.8 | -901.2 | -3122.9 | -657.6  | -1837.6 |
| c2mpyr-dca-p2 | -49.3 | -44.9 | -1581.2 | -4982.8  | -900.8 | -3122.2 | -656.5  | -1835.1 | -900.8 | -3122.6 | -657.7  | -1838.0 |
| c2mpyr-dca-p3 | -49.5 | -45.5 | -1581.0 | -4983.1  | -900.9 | -3122.3 | -656.4  | -1835.1 | -900.9 | -3122.7 | -657.4  | -1837.6 |



|                |       |       |         |          |         |         |         |         |         |         |         |         |
|----------------|-------|-------|---------|----------|---------|---------|---------|---------|---------|---------|---------|---------|
| c2mpyr-mes-p1  | -48.5 | -39.2 | -1733.5 | -5468.2  | -900.7  | -3122.2 | -809.3  | -2321.1 | -900.7  | -3122.8 | -812.0  | -2327.1 |
| c2mpyr-mes-p2  | -44.8 | -36.0 | -1732.4 | -5467.0  | -901.3  | -3122.7 | -809.3  | -2321.2 | -901.4  | -3123.2 | -811.9  | -2326.9 |
| c2mpyr-mes-p3  | -43.6 | -35.3 | -1731.3 | -5466.0  | -900.8  | -3122.5 | -809.3  | -2321.1 | -900.9  | -3122.9 | -811.7  | -2326.6 |
| c2mpyr-ntf2-p1 | -53.8 | -46.8 | -3510.9 | -10207.1 | -901.0  | -3121.9 | -2584.8 | -7056.3 | -901.1  | -3122.6 | -2586.7 | -7060.7 |
| c2mpyr-ntf2-p2 | -42.6 | -36.9 | -3505.9 | -10199.1 | -900.6  | -3121.7 | -2584.6 | -7055.3 | -900.7  | -3122.4 | -2586.1 | -7058.8 |
| c2mpyr-ntf2-p3 | -52.5 | -45.8 | -3510.1 | -10206.1 | -900.8  | -3122.0 | -2584.7 | -7056.1 | -900.9  | -3122.5 | -2586.6 | -7060.3 |
| c2mpyr-ntf2-p4 | -51.9 | -45.1 | -3509.6 | -10206.0 | -900.8  | -3121.9 | -2584.8 | -7056.2 | -900.9  | -3122.5 | -2586.6 | -7060.6 |
| c2mpyr-ntf2-p5 | -44.4 | -38.4 | -3506.4 | -10199.8 | -900.5  | -3121.7 | -2584.5 | -7055.1 | -900.6  | -3122.3 | -2586.1 | -7058.8 |
| c2mpyr-ntf2-p6 | -41.5 | -36.3 | -3505.7 | -10198.6 | -900.9  | -3122.0 | -2584.7 | -7055.2 | -900.9  | -3122.5 | -2586.1 | -7058.5 |
| c2mpyr-pf6-p1  | -38.3 | -30.7 | -2231.7 | -6773.6  | -900.9  | -3122.0 | -1313.0 | -3631.1 | -900.9  | -3122.6 | -1315.3 | -3635.8 |
| c2mpyr-pf6-p2  | -36.3 | -29.0 | -2230.9 | -6772.6  | -900.9  | -3122.1 | -1313.0 | -3631.2 | -900.9  | -3122.5 | -1315.3 | -3635.7 |
| c2mpyr-pf6-p3  | -35.6 | -28.7 | -2230.3 | -6772.2  | -900.7  | -3122.0 | -1313.0 | -3631.1 | -900.8  | -3122.4 | -1315.1 | -3635.5 |
| c2mpyr-tos-p1  | -45.6 | -37.0 | -2416.7 | -7429.4  | -900.6  | -3122.1 | -1493.5 | -4284.2 | -900.7  | -3122.8 | -1495.9 | -4289.7 |
| c2mpyr-tos-p2  | -42.1 | -33.9 | -2415.6 | -7428.2  | -901.3  | -3122.7 | -1493.5 | -4284.3 | -901.3  | -3123.1 | -1495.9 | -4289.5 |
| c3mim-bf4-p1   | -40.5 | -32.1 | -1930.4 | -5803.2  | -1052.5 | -3381.3 | -859.4  | -2400.0 | -1052.7 | -3382.3 | -861.6  | -2405.0 |
| c3mim-bf4-p2   | -39.3 | -31.3 | -1929.9 | -5802.7  | -1052.5 | -3381.3 | -859.4  | -2400.0 | -1052.7 | -3382.4 | -861.5  | -2404.8 |
| c3mim-br-p1    | -56.2 | -46.0 | -1289.5 | -3921.8  | -1053.7 | -3387.7 | -209.5  | -504.1  | -1053.7 | -3388.2 | -212.5  | -510.8  |
| c3mim-br-p2    | -41.9 | -32.6 | -1284.0 | -3915.1  | -1054.4 | -3389.3 | -209.5  | -504.1  | -1054.5 | -3389.6 | -212.1  | -510.5  |
| c3mim-br-p3    | -46.9 | -36.8 | -1286.0 | -3917.1  | -1054.0 | -3388.6 | -209.5  | -504.1  | -1054.1 | -3389.0 | -212.3  | -511.0  |
| c3mim-br-p4    | -57.1 | -46.7 | -1290.3 | -3923.0  | -1054.0 | -3388.6 | -209.5  | -504.1  | -1054.1 | -3389.1 | -212.5  | -510.9  |
| c3mim-cl-p1    | -45.9 | -38.7 | -1218.8 | -3854.3  | -1053.6 | -3387.5 | -143.7  | -442.5  | -1053.6 | -3387.9 | -145.4  | -447.4  |
| c3mim-cl-p2    | -36.1 | -29.8 | -1216.1 | -3850.6  | -1054.7 | -3389.7 | -143.7  | -442.5  | -1054.7 | -3390.1 | -145.0  | -447.2  |
| c3mim-cl-p3    | -40.3 | -33.1 | -1217.5 | -3852.1  | -1054.2 | -3389.0 | -143.7  | -442.5  | -1054.3 | -3389.3 | -145.3  | -447.6  |
| c3mim-cl-p4    | -45.6 | -38.4 | -1218.9 | -3854.9  | -1053.8 | -3388.2 | -143.7  | -442.5  | -1053.9 | -3388.7 | -145.4  | -447.4  |
| c3mim-dca-p1   | -68.2 | -62.4 | -1746.1 | -5267.0  | -1052.3 | -3381.3 | -662.0  | -1849.3 | -1052.5 | -3382.2 | -663.3  | -1852.8 |
| c3mim-dca-p2   | -69.4 | -63.5 | -1747.0 | -5268.2  | -1052.7 | -3382.0 | -662.0  | -1849.1 | -1052.9 | -3382.9 | -663.3  | -1852.6 |
| c3mim-dca-p3   | -59.7 | -54.4 | -1742.8 | -5263.5  | -1052.8 | -3382.8 | -661.8  | -1849.2 | -1052.9 | -3383.4 | -663.0  | -1852.6 |
| c3mim-dca-p4   | -70.8 | -64.8 | -1747.8 | -5268.0  | -1052.5 | -3381.6 | -662.1  | -1849.0 | -1052.6 | -3382.5 | -663.4  | -1852.5 |
| c3mim-dca-p5   | -66.9 | -61.3 | -1744.8 | -5265.7  | -1051.9 | -3380.8 | -661.9  | -1849.0 | -1052.0 | -3381.8 | -663.1  | -1852.3 |
| c3mim-dca-p6   | -66.0 | -60.5 | -1744.7 | -5265.4  | -1052.0 | -3380.9 | -662.1  | -1849.1 | -1052.1 | -3381.7 | -663.3  | -1852.4 |
| c3mim-mes-p1   | -59.4 | -48.7 | -1891.3 | -5733.6  | -1053.4 | -3382.7 | -809.3  | -2320.1 | -1053.5 | -3383.7 | -812.3  | -2326.7 |
| c3mim-mes-p2   | -51.8 | -41.8 | -1886.3 | -5728.3  | -1052.2 | -3380.9 | -809.4  | -2320.3 | -1052.3 | -3381.8 | -812.2  | -2326.4 |
| c3mim-ntf2-p1  | -87.7 | -76.2 | -3679.3 | -10486.0 | -1052.5 | -3381.3 | -2586.4 | -7057.3 | -1052.8 | -3382.9 | -2589.3 | -7064.1 |
| c3mim-ntf2-p2  | -58.6 | -50.4 | -3666.6 | -10469.8 | -1052.7 | -3382.6 | -2585.9 | -7056.5 | -1052.8 | -3383.5 | -2587.9 | -7061.7 |
| c3mim-ntf2-p3  | -52.0 | -44.3 | -3664.3 | -10464.3 | -1052.2 | -3381.7 | -2586.4 | -7056.3 | -1052.5 | -3382.8 | -2588.3 | -7060.8 |
| c3mim-ntf2-p4  | -75.3 | -65.4 | -3673.3 | -10478.9 | -1052.1 | -3380.6 | -2586.6 | -7057.6 | -1052.3 | -3381.9 | -2589.1 | -7063.4 |
| c3mim-pf6-p1   | -44.9 | -36.1 | -2385.5 | -7035.9  | -1052.2 | -3380.9 | -1312.9 | -3630.5 | -1052.4 | -3381.8 | -1315.4 | -3635.8 |
| c3mim-pf6-p2   | -41.0 | -32.2 | -2383.2 | -7033.3  | -1051.7 | -3380.2 | -1312.9 | -3630.7 | -1051.9 | -3381.1 | -1315.4 | -3635.9 |
| c3mim-tos-p1   | -59.0 | -48.5 | -2575.9 | -7696.7  | -1053.2 | -3382.4 | -1494.2 | -4283.8 | -1053.3 | -3383.5 | -1497.0 | -4290.2 |



|                |       |       |         |          |         |         |         |         |         |         |         |         |
|----------------|-------|-------|---------|----------|---------|---------|---------|---------|---------|---------|---------|---------|
| c3mim-tos-p2   | -55.6 | -45.7 | -2573.9 | -7694.6  | -1052.9 | -3382.0 | -1494.2 | -4283.9 | -1053.1 | -3383.0 | -1496.9 | -4289.9 |
| c3mpyr-bf4-p1  | -38.9 | -31.1 | -1887.7 | -5924.1  | -1010.6 | -3504.8 | -859.0  | -2398.5 | -1010.7 | -3505.5 | -861.2  | -2403.3 |
| c3mpyr-bf4-p2  | -36.2 | -29.1 | -1886.9 | -5923.0  | -1011.0 | -3505.1 | -859.0  | -2398.5 | -1011.0 | -3505.6 | -861.1  | -2403.1 |
| c3mpyr-bf4-p3  | -36.3 | -29.2 | -1886.5 | -5923.0  | -1010.7 | -3505.0 | -859.0  | -2398.5 | -1010.7 | -3505.4 | -861.0  | -2403.1 |
| c3mpyr-br-p1   | -57.0 | -47.2 | -1247.2 | -4040.3  | -1011.3 | -3505.7 | -209.5  | -504.1  | -1011.3 | -3505.9 | -212.4  | -510.8  |
| c3mpyr-br-p2   | -54.3 | -44.5 | -1245.7 | -4039.1  | -1011.2 | -3505.7 | -209.5  | -504.1  | -1011.2 | -3506.0 | -212.3  | -510.8  |
| c3mpyr-br-p3   | -54.2 | -45.0 | -1245.8 | -4039.0  | -1011.2 | -3505.8 | -209.5  | -504.1  | -1011.2 | -3506.0 | -212.2  | -510.4  |
| c3mpyr-cl-p1   | -48.3 | -41.5 | -1177.5 | -3974.0  | -1011.3 | -3505.7 | -143.7  | -442.5  | -1011.3 | -3505.9 | -145.3  | -447.4  |
| c3mpyr-cl-p2   | -47.0 | -40.3 | -1176.6 | -3973.4  | -1011.1 | -3505.8 | -143.7  | -442.5  | -1011.1 | -3506.0 | -145.3  | -447.4  |
| c3mpyr-cl-p3   | -46.6 | -40.2 | -1176.6 | -3973.3  | -1011.3 | -3505.9 | -143.7  | -442.5  | -1011.3 | -3506.0 | -145.2  | -447.2  |
| c3mpyr-dca-p1  | -47.0 | -42.7 | -1690.3 | -5364.2  | -1010.9 | -3505.1 | -656.5  | -1835.0 | -1010.9 | -3505.6 | -657.6  | -1837.8 |
| c3mpyr-dca-p2  | -49.3 | -44.8 | -1691.1 | -5365.7  | -1010.8 | -3505.1 | -656.5  | -1835.1 | -1010.8 | -3505.5 | -657.7  | -1838.0 |
| c3mpyr-dca-p3  | -45.4 | -41.3 | -1687.8 | -5366.0  | -1010.8 | -3505.1 | -656.5  | -1836.0 | -1010.9 | -3505.5 | -657.4  | -1838.7 |
| c3mpyr-dca-p4  | -47.7 | -43.5 | -1690.2 | -5365.2  | -1011.0 | -3505.3 | -656.4  | -1835.0 | -1011.0 | -3505.7 | -657.4  | -1837.7 |
| c3mpyr-dca-p5  | -49.4 | -45.4 | -1691.0 | -5365.9  | -1010.8 | -3505.1 | -656.4  | -1835.0 | -1010.8 | -3505.5 | -657.4  | -1837.7 |
| c3mpyr-mes-p1  | -49.4 | -39.8 | -1843.8 | -5851.6  | -1010.6 | -3505.0 | -809.3  | -2321.1 | -1010.7 | -3505.6 | -812.1  | -2327.2 |
| c3mpyr-mes-p2  | -45.1 | -36.2 | -1842.4 | -5850.0  | -1011.3 | -3505.5 | -809.3  | -2321.2 | -1011.3 | -3506.0 | -812.0  | -2327.0 |
| c3mpyr-mes-p3  | -44.6 | -36.0 | -1841.7 | -5849.4  | -1010.8 | -3505.4 | -809.3  | -2321.1 | -1010.8 | -3505.8 | -811.8  | -2326.8 |
| c3mpyr-ntf2-p1 | -55.6 | -48.6 | -3621.7 | -10591.0 | -1011.0 | -3505.0 | -2584.8 | -7056.3 | -1011.1 | -3505.8 | -2586.6 | -7060.6 |
| c3mpyr-ntf2-p2 | -42.5 | -36.8 | -3616.0 | -10581.7 | -1010.7 | -3504.7 | -2584.6 | -7055.2 | -1010.7 | -3505.3 | -2586.2 | -7058.7 |
| c3mpyr-ntf2-p3 | -52.9 | -46.0 | -3620.1 | -10589.2 | -1010.7 | -3504.7 | -2584.8 | -7056.2 | -1010.7 | -3505.4 | -2586.6 | -7060.5 |
| c3mpyr-ntf2-p4 | -54.0 | -47.0 | -3620.6 | -10589.9 | -1010.7 | -3504.9 | -2584.7 | -7056.1 | -1010.8 | -3505.5 | -2586.6 | -7060.6 |
| c3mpyr-ntf2-p5 | -44.3 | -38.3 | -3616.3 | -10582.5 | -1010.4 | -3504.5 | -2584.5 | -7055.0 | -1010.5 | -3505.2 | -2586.1 | -7058.7 |
| c3mpyr-ntf2-p6 | -43.3 | -37.7 | -3616.4 | -10582.3 | -1010.8 | -3504.9 | -2584.6 | -7055.1 | -1010.9 | -3505.5 | -2586.1 | -7058.6 |
| c3mpyr-pf6-p1  | -39.5 | -31.6 | -2341.9 | -7156.9  | -1010.5 | -3504.6 | -1313.0 | -3631.1 | -1010.6 | -3505.2 | -1315.4 | -3636.0 |
| c3mpyr-pf6-p2  | -36.2 | -28.9 | -2340.7 | -7155.3  | -1010.8 | -3504.8 | -1313.0 | -3631.1 | -1010.9 | -3505.3 | -1315.3 | -3635.7 |
| c3mpyr-pf6-p3  | -36.2 | -29.1 | -2340.4 | -7155.4  | -1010.6 | -3504.8 | -1313.0 | -3631.1 | -1010.7 | -3505.2 | -1315.2 | -3635.6 |
| c3mpyr-tos-p1  | -46.8 | -37.8 | -2527.0 | -7812.9  | -1010.6 | -3505.0 | -1493.4 | -4284.2 | -1010.7 | -3505.7 | -1496.0 | -4289.9 |
| c3mpyr-tos-p2  | -42.4 | -34.1 | -2525.5 | -7811.2  | -1011.2 | -3505.4 | -1493.4 | -4284.2 | -1011.3 | -3506.0 | -1495.8 | -4289.5 |
| c4mim-bf4-p1   | -41.1 | -32.5 | -2040.7 | -6185.9  | -1162.5 | -3763.7 | -859.4  | -2400.0 | -1162.7 | -3764.8 | -861.6  | -2405.1 |
| c4mim-bf4-p2   | -39.5 | -31.4 | -2039.9 | -6185.1  | -1162.4 | -3763.6 | -859.4  | -2400.0 | -1162.6 | -3764.7 | -861.5  | -2404.8 |
| c4mim-br-p1    | -57.3 | -46.8 | -1399.9 | -4305.2  | -1163.6 | -3770.6 | -209.5  | -504.1  | -1163.7 | -3771.1 | -212.5  | -511.0  |
| c4mim-br-p2    | -42.9 | -33.4 | -1394.5 | -4298.5  | -1164.4 | -3772.1 | -209.5  | -504.1  | -1164.4 | -3772.4 | -212.1  | -510.6  |
| c4mim-br-p3    | -49.0 | -38.5 | -1396.9 | -4301.1  | -1164.0 | -3771.4 | -209.5  | -504.1  | -1164.0 | -3771.8 | -212.5  | -511.2  |
| c4mim-br-p4    | -57.8 | -47.2 | -1400.4 | -4306.1  | -1163.9 | -3771.2 | -209.5  | -504.1  | -1164.0 | -3771.8 | -212.5  | -511.1  |
| c4mim-cl-p1    | -46.6 | -39.3 | -1329.0 | -4237.5  | -1163.4 | -3770.3 | -143.7  | -442.5  | -1163.5 | -3770.7 | -145.5  | -447.5  |
| c4mim-cl-p2    | -36.7 | -30.2 | -1326.3 | -4233.7  | -1164.6 | -3772.6 | -143.7  | -442.5  | -1164.6 | -3772.9 | -145.0  | -447.3  |
| c4mim-cl-p3    | -41.7 | -34.3 | -1328.1 | -4235.7  | -1164.2 | -3771.8 | -143.7  | -442.5  | -1164.2 | -3772.2 | -145.3  | -447.8  |
| c4mim-cl-p4    | -46.1 | -38.8 | -1329.0 | -4237.8  | -1163.7 | -3770.9 | -143.7  | -442.5  | -1163.7 | -3771.4 | -145.4  | -447.5  |



|                |       |       |         |          |         |         |         |         |         |         |         |         |
|----------------|-------|-------|---------|----------|---------|---------|---------|---------|---------|---------|---------|---------|
| c4mim-dca-p1   | -69.0 | -63.0 | -1856.5 | -5649.9  | -1162.3 | -3763.8 | -662.0  | -1849.3 | -1162.5 | -3764.7 | -663.3  | -1852.9 |
| c4mim-dca-p2   | -72.5 | -66.3 | -1858.6 | -5651.5  | -1162.5 | -3764.0 | -662.1  | -1849.0 | -1162.6 | -3765.0 | -663.4  | -1852.7 |
| c4mim-dca-p3   | -67.1 | -61.6 | -1854.8 | -5648.2  | -1161.8 | -3763.1 | -661.9  | -1849.0 | -1161.9 | -3764.1 | -663.1  | -1852.3 |
| c4mim-mes-p1   | -60.7 | -49.8 | -2001.9 | -6116.7  | -1163.3 | -3765.1 | -809.4  | -2320.1 | -1163.5 | -3766.1 | -812.4  | -2326.9 |
| c4mim-mes-p2   | -51.9 | -41.9 | -1996.1 | -6110.6  | -1162.0 | -3763.1 | -809.4  | -2320.3 | -1162.2 | -3764.0 | -812.2  | -2326.4 |
| c4mim-pf6-p1   | -47.9 | -37.7 | -2497.3 | -7420.3  | -1162.4 | -3763.7 | -1312.9 | -3630.7 | -1162.6 | -3764.7 | -1315.9 | -3636.8 |
| c4mim-pf6-p2   | -41.0 | -32.2 | -2493.1 | -7415.7  | -1161.6 | -3762.5 | -1312.9 | -3630.7 | -1161.8 | -3763.4 | -1315.5 | -3636.0 |
| c4mim-tos-p1   | -61.4 | -50.6 | -2687.0 | -8080.4  | -1163.2 | -3764.9 | -1494.2 | -4283.8 | -1163.4 | -3766.0 | -1497.1 | -4290.4 |
| c4mim-tos-p2   | -56.7 | -46.9 | -2684.8 | -8077.9  | -1163.2 | -3764.8 | -1494.2 | -4283.9 | -1163.4 | -3765.9 | -1496.8 | -4289.8 |
| c4mpyr-bf4-p1  | -39.0 | -31.2 | -1997.5 | -6306.7  | -1120.4 | -3887.3 | -859.0  | -2398.5 | -1120.5 | -3888.0 | -861.2  | -2403.4 |
| c4mpyr-bf4-p2  | -36.4 | -29.2 | -1996.7 | -6305.7  | -1120.8 | -3887.6 | -859.0  | -2398.5 | -1120.8 | -3888.1 | -861.1  | -2403.2 |
| c4mpyr-bf4-p3  | -36.6 | -29.4 | -1996.5 | -6305.8  | -1120.5 | -3887.6 | -859.0  | -2398.5 | -1120.6 | -3888.1 | -861.1  | -2403.2 |
| c4mpyr-br-p1   | -57.3 | -47.4 | -1357.2 | -4423.0  | -1121.1 | -3888.2 | -209.5  | -504.1  | -1121.1 | -3888.4 | -212.4  | -510.9  |
| c4mpyr-br-p2   | -54.7 | -44.7 | -1355.6 | -4421.9  | -1121.0 | -3888.3 | -209.5  | -504.1  | -1121.0 | -3888.5 | -212.4  | -510.9  |
| c4mpyr-br-p3   | -54.5 | -45.2 | -1355.8 | -4421.7  | -1121.0 | -3888.3 | -209.5  | -504.1  | -1121.1 | -3888.5 | -212.2  | -510.5  |
| c4mpyr-cl-p1   | -48.3 | -41.4 | -1287.3 | -4356.5  | -1121.1 | -3888.2 | -143.7  | -442.5  | -1121.1 | -3888.4 | -145.3  | -447.4  |
| c4mpyr-cl-p2   | -47.5 | -40.7 | -1286.7 | -4356.4  | -1120.9 | -3888.5 | -143.7  | -442.5  | -1120.9 | -3888.7 | -145.3  | -447.4  |
| c4mpyr-cl-p3   | -46.6 | -40.1 | -1286.4 | -4355.8  | -1121.1 | -3888.4 | -143.7  | -442.5  | -1121.1 | -3888.5 | -145.3  | -447.2  |
| c4mpyr-dca-p1  | -47.0 | -42.7 | -1799.2 | -5747.5  | -1120.6 | -3887.4 | -656.4  | -1835.2 | -1120.7 | -3888.0 | -657.5  | -1837.9 |
| c4mpyr-dca-p2  | -49.3 | -44.8 | -1800.9 | -5748.3  | -1120.6 | -3887.7 | -656.5  | -1835.1 | -1120.6 | -3888.1 | -657.7  | -1838.0 |
| c4mpyr-dca-p3  | -47.8 | -43.3 | -1800.4 | -5747.2  | -1120.7 | -3887.6 | -656.5  | -1835.0 | -1120.7 | -3888.1 | -657.6  | -1837.8 |
| c4mpyr-dca-p4  | -48.7 | -44.2 | -1800.2 | -5748.3  | -1120.6 | -3887.6 | -656.5  | -1835.1 | -1120.6 | -3888.2 | -657.5  | -1837.8 |
| c4mpyr-dca-p5  | -49.5 | -45.5 | -1800.8 | -5748.5  | -1120.6 | -3887.6 | -656.4  | -1835.1 | -1120.6 | -3888.1 | -657.5  | -1837.7 |
| c4mpyr-mes-p1  | -49.4 | -39.8 | -1953.6 | -6234.1  | -1120.4 | -3887.5 | -809.3  | -2321.1 | -1120.5 | -3888.2 | -812.1  | -2327.3 |
| c4mpyr-mes-p2  | -45.6 | -36.5 | -1952.4 | -6232.9  | -1121.1 | -3888.1 | -809.3  | -2321.2 | -1121.1 | -3888.6 | -812.0  | -2327.1 |
| c4mpyr-mes-p3  | -44.9 | -36.2 | -1951.7 | -6232.2  | -1120.6 | -3887.9 | -809.3  | -2321.1 | -1120.7 | -3888.4 | -811.8  | -2326.8 |
| c4mpyr-ntf2-p1 | -55.8 | -48.6 | -3731.5 | -10973.6 | -1120.8 | -3887.5 | -2584.8 | -7056.2 | -1120.9 | -3888.3 | -2586.7 | -7060.6 |
| c4mpyr-ntf2-p2 | -47.9 | -41.1 | -3728.0 | -10966.8 | -1120.5 | -3887.2 | -2584.5 | -7054.8 | -1120.6 | -3888.1 | -2586.2 | -7058.8 |
| c4mpyr-ntf2-p3 | -54.1 | -47.2 | -3730.6 | -10972.5 | -1120.5 | -3887.4 | -2584.8 | -7056.2 | -1120.6 | -3888.1 | -2586.6 | -7060.6 |
| c4mpyr-ntf2-p4 | -55.2 | -47.9 | -3731.0 | -10973.1 | -1120.6 | -3887.4 | -2584.8 | -7056.2 | -1120.6 | -3888.0 | -2586.7 | -7060.8 |
| c4mpyr-ntf2-p5 | -45.0 | -38.8 | -3726.4 | -10965.5 | -1120.2 | -3887.2 | -2584.5 | -7055.0 | -1120.3 | -3887.8 | -2586.1 | -7058.8 |
| c4mpyr-ntf2-p6 | -45.1 | -39.0 | -3727.0 | -10965.8 | -1120.7 | -3887.5 | -2584.5 | -7055.0 | -1120.7 | -3888.1 | -2586.2 | -7058.7 |
| c4mpyr-pf6-p1  | -39.6 | -31.6 | -2451.8 | -7539.5  | -1120.4 | -3887.2 | -1313.0 | -3631.1 | -1120.4 | -3887.8 | -1315.4 | -3636.1 |
| c4mpyr-pf6-p2  | -36.6 | -29.2 | -2450.7 | -7538.2  | -1120.7 | -3887.4 | -1313.0 | -3631.1 | -1120.7 | -3887.9 | -1315.3 | -3635.8 |
| c4mpyr-pf6-p3  | -36.4 | -29.3 | -2450.4 | -7538.1  | -1120.5 | -3887.4 | -1313.0 | -3631.1 | -1120.5 | -3887.8 | -1315.2 | -3635.7 |
| c4mpyr-tos-p1  | -47.0 | -37.9 | -2637.1 | -8195.7  | -1120.5 | -3887.6 | -1493.5 | -4284.2 | -1120.6 | -3888.3 | -1496.0 | -4289.9 |
| c4mpyr-tos-p2  | -43.1 | -34.6 | -2635.8 | -8194.3  | -1121.1 | -3888.1 | -1493.5 | -4284.3 | -1121.1 | -3888.6 | -1496.0 | -4289.7 |



### 2.3.2 augmented D→T

Table S 21: Raw CBS (augmented D→T) energies. Superscript \* indicates monomer calculated in the dimer basis set.

| ion pair       | E(int) | E(int) CP | E(dimer) SS | E(dimer) OS | E(A) SS | E(A) OS | E(B) SS | E(B) OS | E(A) SS* | E(A) OS* | E(B) SS* | E(B) OS* |
|----------------|--------|-----------|-------------|-------------|---------|---------|---------|---------|----------|----------|----------|----------|
| clmim-bf4-p1   | -36.6  | -31.6     | -1705.8     | -5091.8     | -831.2  | -2639.9 | -858.8  | -2431.3 | -831.2   | -2641.2  | -858.9   | -2434.8  |
| clmim-br-p1    | -60.1  | -45.5     | -1076.1     | -3200.7     | -833.1  | -2647.2 | -216.3  | -520.1  | -833.1   | -2647.8  | -220.0   | -530.4   |
| clmim-br-p2    | -44.5  | -28.8     | -1068.3     | -3192.3     | -832.8  | -2647.1 | -216.3  | -520.1  | -832.8   | -2647.6  | -220.0   | -531.4   |
| clmim-cl-p1    | -41.3  | -37.3     | -997.8      | -3120.7     | -832.9  | -2646.9 | -145.7  | -451.7  | -832.9   | -2647.4  | -145.7   | -455.2   |
| clmim-cl-p2    | -31.8  | -26.1     | -993.6      | -3116.2     | -833.0  | -2647.6 | -145.7  | -451.7  | -833.0   | -2648.2  | -145.9   | -456.7   |
| clmim-dca-p1   | -66.2  | -62.3     | -1526.7     | -4550.9     | -831.6  | -2641.1 | -664.8  | -1873.8 | -831.6   | -2642.4  | -664.8   | -1876.4  |
| clmim-dca-p2   | -49.9  | -45.7     | -1518.9     | -4543.1     | -831.7  | -2642.1 | -664.5  | -1873.9 | -831.7   | -2643.3  | -664.5   | -1876.9  |
| clmim-mes-p1   | -48.1  | -42.6     | -1666.8     | -5019.6     | -831.7  | -2640.8 | -812.8  | -2353.0 | -831.7   | -2642.3  | -812.8   | -2357.0  |
| clmim-ntf2-p1  | -78.0  | -68.9     | -3455.2     | -9838.9     | -831.2  | -2640.0 | -2590.4 | -7154.5 | -831.2   | -2642.2  | -2590.6  | -7161.2  |
| clmim-ntf2-p2  | -44.2  | -35.9     | -3440.3     | -9819.0     | -831.5  | -2641.6 | -2589.5 | -7152.5 | -831.6   | -2643.4  | -2589.9  | -7158.6  |
| clmim-ntf2-p3  | -48.4  | -40.6     | -3443.3     | -9820.8     | -831.2  | -2640.7 | -2590.3 | -7153.4 | -831.3   | -2642.6  | -2590.5  | -7159.1  |
| clmim-pf6-p1   | -39.9  | -34.0     | -2161.8     | -6344.6     | -831.2  | -2640.0 | -1313.6 | -3681.8 | -831.2   | -2641.3  | -1313.7  | -3686.1  |
| clmim-tos-p1   | -46.2  | -40.5     | -2350.6     | -7001.8     | -831.4  | -2640.4 | -1498.0 | -4336.4 | -831.4   | -2642.0  | -1498.0  | -4340.4  |
| clmpyr-bf4-p1  | -36.9  | -31.0     | -1662.9     | -5213.8     | -788.6  | -2763.2 | -858.4  | -2429.7 | -788.5   | -2764.0  | -858.7   | -2434.5  |
| clmpyr-bf4-p2  | -34.0  | -28.6     | -1661.7     | -5212.5     | -788.7  | -2763.4 | -858.4  | -2429.7 | -788.7   | -2764.1  | -858.7   | -2434.2  |
| clmpyr-br-p1   | -64.0  | -45.8     | -1032.8     | -3321.0     | -789.3  | -2764.2 | -216.3  | -520.1  | -789.3   | -2764.5  | -220.8   | -533.4   |
| clmpyr-br-p2   | -61.0  | -43.7     | -1031.4     | -3319.6     | -789.3  | -2764.4 | -216.3  | -520.1  | -789.3   | -2764.7  | -220.6   | -532.8   |
| clmpyr-cl-p1   | -45.0  | -39.8     | -955.2      | -3240.9     | -789.3  | -2764.3 | -145.7  | -451.7  | -789.3   | -2764.6  | -145.8   | -456.5   |
| clmpyr-cl-p2   | -43.9  | -38.7     | -954.6      | -3240.5     | -789.3  | -2764.4 | -145.7  | -451.7  | -789.3   | -2764.7  | -145.8   | -456.5   |
| clmpyr-dca-p1  | -46.1  | -42.5     | -1469.7     | -4648.1     | -789.2  | -2763.9 | -659.1  | -1859.6 | -789.1   | -2764.7  | -659.2   | -1862.4  |
| clmpyr-dca-p2  | -49.8  | -46.6     | -1470.9     | -4650.5     | -789.0  | -2763.7 | -659.0  | -1859.9 | -788.9   | -2764.4  | -659.0   | -1862.6  |
| clmpyr-dca-p3  | -46.9  | -42.6     | -1467.7     | -4650.5     | -788.7  | -2763.4 | -658.9  | -1860.3 | -788.6   | -2764.1  | -659.0   | -1863.9  |
| clmpyr-dca-p4  | -48.2  | -44.9     | -1469.8     | -4649.5     | -788.7  | -2763.4 | -659.1  | -1859.9 | -788.6   | -2764.1  | -659.1   | -1862.6  |
| clmpyr-mes-p1  | -44.4  | -38.2     | -1621.7     | -5141.5     | -788.6  | -2763.5 | -812.8  | -2354.0 | -788.5   | -2764.5  | -812.9   | -2359.1  |
| clmpyr-mes-p2  | -39.2  | -33.6     | -1619.6     | -5138.9     | -788.8  | -2763.8 | -812.8  | -2354.0 | -788.8   | -2764.8  | -812.9   | -2358.6  |
| clmpyr-ntf2-p1 | -54.2  | -45.6     | -3400.2     | -9948.0     | -788.9  | -2763.3 | -2588.7 | -7153.1 | -788.9   | -2764.4  | -2589.1  | -7160.3  |
| clmpyr-ntf2-p2 | -42.3  | -35.2     | -3395.5     | -9939.1     | -788.6  | -2763.0 | -2588.6 | -7152.0 | -788.5   | -2764.0  | -2588.9  | -7158.0  |
| clmpyr-ntf2-p3 | -52.8  | -44.2     | -3399.6     | -9946.9     | -788.9  | -2763.4 | -2588.6 | -7152.8 | -788.8   | -2764.5  | -2589.0  | -7159.9  |
| clmpyr-ntf2-p5 | -43.6  | -36.5     | -3396.2     | -9939.7     | -788.9  | -2763.3 | -2588.4 | -7151.7 | -788.8   | -2764.3  | -2588.7  | -7157.7  |
| clmpyr-pf6-p1  | -37.8  | -31.1     | -2118.2     | -6467.2     | -788.6  | -2763.1 | -1313.7 | -3682.2 | -788.5   | -2764.0  | -1314.0  | -3687.8  |
| clmpyr-pf6-p2  | -35.0  | -28.8     | -2117.0     | -6466.0     | -788.7  | -2763.3 | -1313.7 | -3682.3 | -788.7   | -2764.0  | -1314.0  | -3687.6  |
| clmpyr-tos-p1  | -42.4  | -36.0     | -2305.6     | -7123.3     | -788.6  | -2763.5 | -1497.5 | -4337.0 | -788.5   | -2764.5  | -1497.6  | -4342.3  |
| clmpyr-tos-p2  | -37.2  | -31.3     | -2303.0     | -7120.9     | -788.7  | -2763.6 | -1497.4 | -4337.0 | -788.7   | -2764.5  | -1497.5  | -4341.9  |



|               |       |       |         |          |        |         |         |         |        |         |         |         |
|---------------|-------|-------|---------|----------|--------|---------|---------|---------|--------|---------|---------|---------|
| c2mim-bf4-p1  | -39.1 | -33.5 | -1818.7 | -5481.2  | -943.0 | -3027.9 | -858.8  | -2431.2 | -943.0 | -3029.2 | -858.9  | -2435.4 |
| c2mim-bf4-p2  | -36.2 | -31.0 | -1816.9 | -5479.0  | -942.5 | -3027.2 | -858.8  | -2431.3 | -942.5 | -3028.4 | -858.9  | -2435.0 |
| c2mim-br-p1   | -63.3 | -46.9 | -1188.3 | -3590.1  | -944.3 | -3034.5 | -216.3  | -520.1  | -944.3 | -3035.0 | -220.5  | -531.8  |
| c2mim-br-p2   | -49.2 | -32.4 | -1182.9 | -3584.4  | -945.3 | -3036.5 | -216.3  | -520.1  | -945.3 | -3037.0 | -220.2  | -532.3  |
| c2mim-br-p3   | -49.5 | -33.0 | -1182.3 | -3583.2  | -944.4 | -3035.3 | -216.3  | -520.1  | -944.5 | -3035.8 | -220.3  | -532.0  |
| c2mim-br-p4   | -62.2 | -46.8 | -1188.8 | -3590.5  | -945.0 | -3035.8 | -216.3  | -520.1  | -945.0 | -3036.3 | -220.2  | -531.0  |
| c2mim-cl-p1   | -43.6 | -39.1 | -1109.9 | -3509.6  | -944.2 | -3034.3 | -145.7  | -451.7  | -944.2 | -3034.8 | -145.7  | -455.7  |
| c2mim-cl-p2   | -34.5 | -28.5 | -1107.4 | -3507.1  | -945.5 | -3037.0 | -145.7  | -451.7  | -945.6 | -3037.6 | -145.9  | -457.0  |
| c2mim-cl-p3   | -34.8 | -29.2 | -1106.7 | -3506.0  | -944.7 | -3035.8 | -145.7  | -451.7  | -944.7 | -3036.4 | -145.9  | -456.6  |
| c2mim-cl-p4   | -42.4 | -38.2 | -1110.1 | -3509.9  | -944.8 | -3035.4 | -145.7  | -451.7  | -944.8 | -3035.9 | -145.7  | -455.4  |
| c2mim-dca-p1  | -68.1 | -63.6 | -1638.3 | -4939.8  | -942.9 | -3028.1 | -664.7  | -1874.2 | -942.9 | -3029.6 | -664.7  | -1877.3 |
| c2mim-dca-p2  | -64.0 | -59.7 | -1637.0 | -4937.2  | -943.1 | -3028.3 | -664.8  | -1874.1 | -943.1 | -3029.7 | -664.8  | -1876.9 |
| c2mim-dca-p3  | -68.3 | -63.9 | -1639.6 | -4940.4  | -943.7 | -3029.1 | -664.9  | -1874.0 | -943.7 | -3030.5 | -664.9  | -1877.0 |
| c2mim-dca-p4  | -65.0 | -60.8 | -1637.2 | -4937.7  | -942.9 | -3028.2 | -664.8  | -1874.0 | -942.9 | -3029.6 | -664.7  | -1876.8 |
| c2mim-dca-p5  | -66.3 | -62.3 | -1637.9 | -4938.3  | -942.9 | -3028.3 | -664.9  | -1873.9 | -942.9 | -3029.7 | -664.8  | -1876.6 |
| c2mim-dca-p6  | -66.6 | -62.6 | -1637.7 | -4938.5  | -942.8 | -3028.0 | -664.9  | -1874.0 | -942.8 | -3029.3 | -664.8  | -1876.6 |
| c2mim-mes-p1  | -54.3 | -48.0 | -1781.5 | -5411.4  | -943.8 | -3029.1 | -812.8  | -2352.9 | -943.8 | -3030.7 | -812.8  | -2357.6 |
| c2mim-mes-p2  | -48.8 | -43.0 | -1778.0 | -5407.3  | -942.9 | -3027.8 | -812.8  | -2353.1 | -942.9 | -3029.4 | -812.8  | -2357.2 |
| c2mim-ntf2-p1 | -85.4 | -74.7 | -3570.0 | -10231.3 | -943.1 | -3028.0 | -2590.4 | -7154.4 | -943.1 | -3030.3 | -2590.6 | -7162.6 |
| c2mim-ntf2-p2 | -56.0 | -46.2 | -3557.2 | -10215.0 | -943.3 | -3029.5 | -2589.9 | -7153.5 | -943.3 | -3031.5 | -2590.2 | -7161.0 |
| c2mim-ntf2-p3 | -52.4 | -43.7 | -3556.6 | -10210.7 | -942.8 | -3028.4 | -2590.3 | -7153.4 | -942.8 | -3030.3 | -2590.6 | -7159.9 |
| c2mim-ntf2-p4 | -74.8 | -65.4 | -3566.0 | -10225.3 | -942.9 | -3027.9 | -2590.7 | -7154.8 | -942.9 | -3030.1 | -2591.0 | -7161.9 |
| c2mim-pf6-p1  | -44.5 | -37.6 | -2275.4 | -6735.1  | -942.9 | -3027.8 | -1313.6 | -3681.8 | -942.9 | -3029.2 | -1313.8 | -3687.0 |
| c2mim-pf6-p2  | -40.2 | -34.1 | -2273.0 | -6732.1  | -942.5 | -3027.1 | -1313.6 | -3681.8 | -942.5 | -3028.5 | -1313.7 | -3686.3 |
| c2mim-tos-p1  | -54.4 | -47.6 | -2466.3 | -7394.6  | -943.6 | -3028.9 | -1497.9 | -4336.2 | -943.6 | -3030.6 | -1498.0 | -4341.2 |
| c2mim-tos-p2  | -47.5 | -41.5 | -2462.6 | -7389.9  | -942.9 | -3027.9 | -1497.9 | -4336.4 | -942.9 | -3029.5 | -1498.0 | -4340.7 |
| c2mpyr-bf4-p1 | -37.5 | -31.5 | -1776.5 | -5604.9  | -902.0 | -3153.9 | -858.4  | -2429.7 | -901.9 | -3154.7 | -858.7  | -2434.7 |
| c2mpyr-bf4-p2 | -35.1 | -29.5 | -1776.1 | -5604.0  | -902.5 | -3154.4 | -858.4  | -2429.8 | -902.5 | -3155.2 | -858.6  | -2434.3 |
| c2mpyr-bf4-p3 | -34.9 | -29.2 | -1775.4 | -5603.7  | -902.1 | -3154.1 | -858.4  | -2429.7 | -902.0 | -3154.8 | -858.7  | -2434.5 |
| c2mpyr-br-p1  | -65.4 | -46.6 | -1146.7 | -3712.5  | -902.7 | -3154.8 | -216.3  | -520.1  | -902.7 | -3155.1 | -221.0  | -533.9  |
| c2mpyr-br-p2  | -63.3 | -45.0 | -1145.8 | -3711.8  | -902.6 | -3155.3 | -216.3  | -520.1  | -902.6 | -3155.7 | -220.9  | -533.5  |
| c2mpyr-br-p3  | -62.4 | -44.4 | -1145.2 | -3711.0  | -902.6 | -3154.9 | -216.3  | -520.1  | -902.6 | -3155.2 | -220.8  | -533.3  |
| c2mpyr-cl-p1  | -45.5 | -40.2 | -1068.7 | -3631.9  | -902.7 | -3154.9 | -145.7  | -451.7  | -902.7 | -3155.2 | -145.8  | -456.7  |
| c2mpyr-cl-p2  | -44.4 | -39.2 | -1067.9 | -3631.4  | -902.5 | -3155.0 | -145.7  | -451.7  | -902.4 | -3155.4 | -145.8  | -456.6  |
| c2mpyr-cl-p3  | -44.2 | -38.9 | -1068.0 | -3631.3  | -902.7 | -3155.0 | -145.7  | -451.7  | -902.7 | -3155.3 | -145.8  | -456.6  |
| c2mpyr-dca-p1 | -46.2 | -42.6 | -1583.1 | -5038.8  | -902.5 | -3154.5 | -659.1  | -1859.6 | -902.4 | -3155.3 | -659.2  | -1862.5 |
| c2mpyr-dca-p2 | -49.8 | -46.1 | -1584.2 | -5041.0  | -902.1 | -3154.2 | -659.1  | -1860.0 | -902.1 | -3155.0 | -659.1  | -1863.0 |
| c2mpyr-dca-p3 | -50.2 | -46.8 | -1584.2 | -5041.3  | -902.2 | -3154.2 | -659.1  | -1859.9 | -902.1 | -3154.9 | -659.0  | -1862.7 |
| c2mpyr-mes-p1 | -45.7 | -39.3 | -1735.6 | -5533.1  | -902.0 | -3154.1 | -812.8  | -2354.0 | -901.9 | -3155.2 | -812.9  | -2359.4 |



|                |       |       |         |          |         |         |         |         |         |         |         |         |
|----------------|-------|-------|---------|----------|---------|---------|---------|---------|---------|---------|---------|---------|
| c2mpyr-mes-p2  | -42.0 | -36.1 | -1734.6 | -5531.7  | -902.7  | -3154.7 | -812.8  | -2354.1 | -902.7  | -3155.7 | -812.9  | -2359.0 |
| c2mpyr-mes-p3  | -40.8 | -34.9 | -1733.5 | -5530.7  | -902.2  | -3154.5 | -812.8  | -2354.0 | -902.1  | -3155.5 | -812.9  | -2358.9 |
| c2mpyr-ntf2-p1 | -55.6 | -46.8 | -3514.5 | -10339.5 | -902.4  | -3153.9 | -2588.9 | -7153.3 | -902.3  | -3155.0 | -2589.3 | -7160.7 |
| c2mpyr-ntf2-p2 | -44.8 | -37.1 | -3509.8 | -10331.3 | -902.0  | -3153.6 | -2588.6 | -7152.2 | -901.9  | -3154.7 | -2588.9 | -7158.6 |
| c2mpyr-ntf2-p3 | -54.5 | -45.7 | -3513.8 | -10338.7 | -902.2  | -3153.9 | -2588.8 | -7153.1 | -902.1  | -3155.0 | -2589.1 | -7160.4 |
| c2mpyr-ntf2-p4 | -53.4 | -44.7 | -3513.1 | -10338.2 | -902.1  | -3153.9 | -2588.8 | -7153.2 | -902.1  | -3155.0 | -2589.2 | -7160.4 |
| c2mpyr-ntf2-p5 | -46.3 | -38.8 | -3510.4 | -10331.9 | -901.8  | -3153.6 | -2588.5 | -7152.0 | -901.7  | -3154.7 | -2588.7 | -7158.2 |
| c2mpyr-ntf2-p6 | -43.9 | -36.6 | -3509.8 | -10331.0 | -902.2  | -3153.9 | -2588.6 | -7152.1 | -902.1  | -3154.9 | -2588.9 | -7158.3 |
| c2mpyr-pf6-p1  | -38.1 | -31.3 | -2231.9 | -6858.3  | -902.2  | -3154.0 | -1313.7 | -3682.2 | -902.2  | -3154.9 | -1314.0 | -3687.9 |
| c2mpyr-pf6-p2  | -36.1 | -29.6 | -2231.1 | -6857.2  | -902.3  | -3154.0 | -1313.7 | -3682.3 | -902.2  | -3154.9 | -1314.0 | -3687.7 |
| c2mpyr-pf6-p3  | -35.8 | -29.2 | -2230.6 | -6857.1  | -902.1  | -3153.9 | -1313.7 | -3682.3 | -902.0  | -3154.6 | -1314.0 | -3687.9 |
| c2mpyr-tos-p1  | -43.9 | -37.3 | -2419.5 | -7514.9  | -902.0  | -3154.1 | -1497.5 | -4337.0 | -901.9  | -3155.2 | -1497.6 | -4342.5 |
| c2mpyr-tos-p2  | -40.3 | -34.2 | -2418.5 | -7513.7  | -902.7  | -3154.7 | -1497.4 | -4337.1 | -902.6  | -3155.7 | -1497.6 | -4342.1 |
| c3mim-bf4-p1   | -40.1 | -34.1 | -1929.5 | -5868.6  | -1053.3 | -3414.6 | -858.8  | -2431.3 | -1053.3 | -3415.9 | -859.0  | -2435.7 |
| c3mim-bf4-p2   | -38.9 | -33.2 | -1929.0 | -5868.0  | -1053.4 | -3414.7 | -858.8  | -2431.3 | -1053.4 | -3416.0 | -859.0  | -2435.4 |
| c3mim-br-p1    | -64.6 | -47.5 | -1299.1 | -3978.1  | -1054.7 | -3421.6 | -216.3  | -520.1  | -1054.6 | -3422.2 | -220.6  | -532.3  |
| c3mim-br-p2    | -50.0 | -32.8 | -1293.3 | -3971.8  | -1055.4 | -3423.4 | -216.3  | -520.1  | -1055.4 | -3423.9 | -220.4  | -532.6  |
| c3mim-br-p3    | -55.3 | -37.3 | -1295.3 | -3973.8  | -1054.9 | -3422.6 | -216.3  | -520.1  | -1054.9 | -3423.1 | -220.8  | -533.0  |
| c3mim-br-p4    | -64.7 | -48.0 | -1299.8 | -3978.8  | -1055.0 | -3422.5 | -216.3  | -520.1  | -1055.0 | -3423.1 | -220.5  | -531.9  |
| c3mim-cl-p1    | -44.1 | -39.4 | -1220.4 | -3897.1  | -1054.5 | -3421.4 | -145.7  | -451.7  | -1054.5 | -3421.9 | -145.7  | -455.9  |
| c3mim-cl-p2    | -34.7 | -28.6 | -1217.5 | -3894.2  | -1055.6 | -3423.9 | -145.7  | -451.7  | -1055.6 | -3424.5 | -145.9  | -457.1  |
| c3mim-cl-p3    | -38.2 | -32.3 | -1218.7 | -3895.0  | -1055.1 | -3423.0 | -145.7  | -451.7  | -1055.1 | -3423.6 | -145.9  | -456.8  |
| c3mim-cl-p4    | -43.3 | -38.9 | -1220.5 | -3897.2  | -1054.8 | -3422.2 | -145.7  | -451.7  | -1054.8 | -3422.7 | -145.7  | -455.6  |
| c3mim-dca-p1   | -69.2 | -64.4 | -1749.0 | -5327.0  | -1053.2 | -3414.6 | -664.8  | -1874.3 | -1053.2 | -3416.1 | -664.7  | -1877.6 |
| c3mim-dca-p2   | -70.5 | -65.9 | -1750.0 | -5328.3  | -1053.6 | -3415.3 | -664.8  | -1874.1 | -1053.6 | -3416.8 | -664.8  | -1877.3 |
| c3mim-dca-p3   | -60.6 | -55.6 | -1745.5 | -5323.6  | -1053.7 | -3416.2 | -664.6  | -1874.1 | -1053.7 | -3417.5 | -664.6  | -1877.8 |
| c3mim-dca-p4   | -71.9 | -67.1 | -1750.8 | -5328.2  | -1053.3 | -3414.9 | -664.8  | -1874.0 | -1053.3 | -3416.4 | -664.8  | -1877.4 |
| c3mim-dca-p5   | -68.0 | -63.7 | -1747.9 | -5325.6  | -1052.8 | -3414.2 | -664.7  | -1874.0 | -1052.7 | -3415.6 | -664.6  | -1876.9 |
| c3mim-dca-p6   | -66.7 | -62.7 | -1747.7 | -5325.0  | -1052.8 | -3414.2 | -664.9  | -1874.0 | -1052.8 | -3415.6 | -664.8  | -1876.8 |
| c3mim-mes-p1   | -57.1 | -50.2 | -1893.2 | -5800.0  | -1054.2 | -3416.1 | -812.8  | -2353.0 | -1054.2 | -3417.8 | -812.9  | -2358.1 |
| c3mim-mes-p2   | -49.3 | -43.3 | -1888.3 | -5794.1  | -1053.0 | -3414.2 | -812.8  | -2353.1 | -1053.0 | -3415.8 | -812.9  | -2357.4 |
| c3mim-ntf2-p1  | -89.4 | -77.9 | -3682.0 | -10620.4 | -1053.4 | -3414.7 | -2590.4 | -7154.5 | -1053.3 | -3417.1 | -2590.7 | -7163.3 |
| c3mim-ntf2-p2  | -60.9 | -50.3 | -3669.5 | -10604.3 | -1053.5 | -3416.0 | -2589.9 | -7153.5 | -1053.6 | -3418.1 | -2590.3 | -7161.6 |
| c3mim-ntf2-p3  | -54.5 | -45.2 | -3667.7 | -10598.6 | -1053.1 | -3415.0 | -2590.3 | -7153.4 | -1053.1 | -3417.0 | -2590.6 | -7160.3 |
| c3mim-ntf2-p4  | -76.3 | -66.8 | -3676.3 | -10612.4 | -1052.9 | -3413.9 | -2590.7 | -7154.9 | -1052.9 | -3416.0 | -2590.9 | -7162.0 |
| c3mim-pf6-p1   | -45.2 | -38.4 | -2385.6 | -7121.8  | -1053.0 | -3414.1 | -1313.5 | -3681.6 | -1053.0 | -3415.5 | -1313.7 | -3686.7 |
| c3mim-pf6-p2   | -40.3 | -34.1 | -2383.1 | -7118.6  | -1052.6 | -3413.5 | -1313.6 | -3681.8 | -1052.6 | -3414.8 | -1313.8 | -3686.5 |
| c3mim-tos-p1   | -57.8 | -50.4 | -2578.2 | -7783.5  | -1054.0 | -3415.8 | -1497.9 | -4336.2 | -1054.0 | -3417.6 | -1498.0 | -4341.7 |
| c3mim-tos-p2   | -54.4 | -47.4 | -2576.4 | -7781.4  | -1053.8 | -3415.4 | -1497.9 | -4336.3 | -1053.8 | -3417.2 | -1498.0 | -4341.4 |



|                |       |       |         |          |         |         |         |         |         |         |         |         |
|----------------|-------|-------|---------|----------|---------|---------|---------|---------|---------|---------|---------|---------|
| c3mpyr-bf4-p1  | -37.9 | -31.8 | -1886.8 | -5992.3  | -1012.1 | -3541.0 | -858.4  | -2429.7 | -1012.1 | -3541.9 | -858.7  | -2434.8 |
| c3mpyr-bf4-p2  | -35.3 | -29.6 | -1886.1 | -5991.2  | -1012.5 | -3541.3 | -858.4  | -2429.8 | -1012.5 | -3542.1 | -858.6  | -2434.5 |
| c3mpyr-bf4-p3  | -35.3 | -29.4 | -1885.6 | -5991.1  | -1012.2 | -3541.1 | -858.4  | -2429.7 | -1012.1 | -3541.9 | -858.7  | -2434.6 |
| c3mpyr-br-p1   | -66.7 | -47.4 | -1257.4 | -4100.5  | -1012.8 | -3541.9 | -216.3  | -520.1  | -1012.8 | -3542.3 | -221.1  | -534.2  |
| c3mpyr-br-p2   | -63.2 | -44.6 | -1255.6 | -4098.5  | -1012.7 | -3541.9 | -216.3  | -520.1  | -1012.7 | -3542.3 | -220.9  | -533.6  |
| c3mpyr-br-p3   | -63.7 | -45.1 | -1255.9 | -4098.9  | -1012.7 | -3542.0 | -216.3  | -520.1  | -1012.7 | -3542.4 | -220.9  | -533.7  |
| c3mpyr-cl-p1   | -45.9 | -40.6 | -1179.0 | -4019.3  | -1012.9 | -3542.0 | -145.7  | -451.7  | -1012.8 | -3542.3 | -145.8  | -456.7  |
| c3mpyr-cl-p2   | -44.7 | -39.3 | -1178.1 | -4018.6  | -1012.6 | -3542.0 | -145.7  | -451.7  | -1012.6 | -3542.4 | -145.8  | -456.7  |
| c3mpyr-cl-p3   | -44.5 | -39.2 | -1178.2 | -4018.7  | -1012.8 | -3542.1 | -145.7  | -451.7  | -1012.8 | -3542.4 | -145.8  | -456.7  |
| c3mpyr-dca-p1  | -47.2 | -43.8 | -1693.6 | -5426.4  | -1012.4 | -3541.4 | -659.2  | -1859.8 | -1012.3 | -3542.1 | -659.2  | -1862.6 |
| c3mpyr-dca-p2  | -49.8 | -46.0 | -1694.3 | -5428.1  | -1012.3 | -3541.3 | -659.1  | -1859.9 | -1012.2 | -3542.1 | -659.1  | -1863.0 |
| c3mpyr-dca-p3  | -45.7 | -41.4 | -1690.9 | -5428.1  | -1012.4 | -3541.3 | -659.1  | -1860.6 | -1012.3 | -3542.1 | -659.2  | -1864.1 |
| c3mpyr-dca-p4  | -48.1 | -44.7 | -1693.6 | -5427.5  | -1012.5 | -3541.5 | -659.0  | -1859.8 | -1012.5 | -3542.2 | -659.0  | -1862.6 |
| c3mpyr-dca-p5  | -50.1 | -46.7 | -1694.3 | -5428.3  | -1012.3 | -3541.3 | -659.1  | -1859.9 | -1012.2 | -3542.0 | -659.0  | -1862.7 |
| c3mpyr-mes-p1  | -46.6 | -40.0 | -1846.0 | -5920.7  | -1012.1 | -3541.2 | -812.7  | -2354.0 | -1012.1 | -3542.2 | -812.9  | -2359.5 |
| c3mpyr-mes-p2  | -42.3 | -36.2 | -1844.8 | -5919.0  | -1012.8 | -3541.7 | -812.8  | -2354.1 | -1012.7 | -3542.7 | -812.9  | -2359.2 |
| c3mpyr-mes-p3  | -41.7 | -35.7 | -1844.0 | -5918.4  | -1012.3 | -3541.6 | -812.8  | -2354.0 | -1012.3 | -3542.6 | -812.9  | -2359.0 |
| c3mpyr-ntf2-p1 | -58.1 | -48.7 | -3625.6 | -10728.4 | -1012.5 | -3541.2 | -2588.8 | -7153.3 | -1012.4 | -3542.4 | -2589.2 | -7161.1 |
| c3mpyr-ntf2-p2 | -44.8 | -37.0 | -3620.2 | -10718.4 | -1012.2 | -3540.9 | -2588.6 | -7152.1 | -1012.1 | -3541.9 | -2588.9 | -7158.6 |
| c3mpyr-ntf2-p3 | -54.9 | -45.9 | -3623.9 | -10726.0 | -1012.2 | -3540.9 | -2588.8 | -7153.2 | -1012.1 | -3542.1 | -2589.2 | -7160.7 |
| c3mpyr-ntf2-p4 | -55.8 | -46.7 | -3624.3 | -10726.7 | -1012.3 | -3541.1 | -2588.8 | -7153.0 | -1012.2 | -3542.3 | -2589.2 | -7160.7 |
| c3mpyr-ntf2-p5 | -46.3 | -38.7 | -3620.4 | -10719.0 | -1011.9 | -3540.7 | -2588.5 | -7151.9 | -1011.9 | -3541.8 | -2588.7 | -7158.2 |
| c3mpyr-ntf2-p6 | -45.8 | -38.1 | -3620.6 | -10719.2 | -1012.3 | -3541.1 | -2588.6 | -7152.0 | -1012.3 | -3542.1 | -2588.9 | -7158.5 |
| c3mpyr-pf6-p1  | -39.5 | -32.3 | -2342.2 | -7246.0  | -1012.0 | -3540.8 | -1313.7 | -3682.2 | -1012.0 | -3541.7 | -1314.0 | -3688.3 |
| c3mpyr-pf6-p2  | -36.1 | -29.5 | -2341.1 | -7244.3  | -1012.3 | -3541.0 | -1313.7 | -3682.2 | -1012.3 | -3541.9 | -1314.0 | -3687.8 |
| c3mpyr-pf6-p3  | -36.4 | -29.6 | -2340.9 | -7244.6  | -1012.2 | -3541.0 | -1313.7 | -3682.2 | -1012.1 | -3541.8 | -1314.0 | -3688.0 |
| c3mpyr-tos-p1  | -45.0 | -38.1 | -2530.0 | -7902.8  | -1012.1 | -3541.2 | -1497.4 | -4337.0 | -1012.0 | -3542.3 | -1497.6 | -4342.7 |
| c3mpyr-tos-p2  | -40.7 | -34.4 | -2528.7 | -7900.9  | -1012.8 | -3541.7 | -1497.4 | -4337.0 | -1012.7 | -3542.7 | -1497.5 | -4342.3 |
| c4mim-bf4-p1   | -40.7 | -34.6 | -2039.9 | -6255.6  | -1163.5 | -3801.2 | -858.8  | -2431.2 | -1163.5 | -3802.5 | -859.0  | -2435.8 |
| c4mim-bf4-p2   | -39.1 | -33.3 | -2039.1 | -6254.6  | -1163.5 | -3801.1 | -858.8  | -2431.3 | -1163.5 | -3802.5 | -859.0  | -2435.5 |
| c4mim-br-p1    | -66.1 | -48.4 | -1409.9 | -4366.1  | -1164.8 | -3808.7 | -216.3  | -520.1  | -1164.8 | -3809.3 | -220.8  | -532.7  |
| c4mim-br-p2    | -51.4 | -33.7 | -1404.0 | -4359.7  | -1165.5 | -3810.5 | -216.3  | -520.1  | -1165.6 | -3811.0 | -220.5  | -533.0  |
| c4mim-br-p3    | -57.9 | -39.0 | -1406.6 | -4362.4  | -1165.1 | -3809.7 | -216.3  | -520.1  | -1165.1 | -3810.2 | -221.0  | -533.6  |
| c4mim-br-p4    | -65.7 | -48.5 | -1410.2 | -4366.3  | -1165.0 | -3809.4 | -216.3  | -520.1  | -1165.0 | -3810.0 | -220.7  | -532.3  |
| c4mim-cl-p1    | -44.8 | -40.0 | -1330.8 | -4284.5  | -1164.6 | -3808.4 | -145.7  | -451.7  | -1164.6 | -3809.0 | -145.7  | -456.0  |
| c4mim-cl-p2    | -35.3 | -29.1 | -1327.9 | -4281.6  | -1165.8 | -3811.0 | -145.7  | -451.7  | -1165.8 | -3811.6 | -145.9  | -457.2  |
| c4mim-cl-p3    | -39.7 | -33.6 | -1329.4 | -4282.9  | -1165.3 | -3810.0 | -145.7  | -451.7  | -1165.3 | -3810.6 | -145.9  | -457.0  |
| c4mim-cl-p4    | -43.8 | -39.3 | -1330.7 | -4284.4  | -1164.8 | -3809.0 | -145.7  | -451.7  | -1164.8 | -3809.6 | -145.7  | -455.7  |
| c4mim-dca-p1   | -70.0 | -65.1 | -1859.5 | -5714.1  | -1163.4 | -3801.3 | -664.8  | -1874.3 | -1163.4 | -3802.7 | -664.8  | -1877.7 |



|                |       |       |         |          |         |         |         |         |         |         |         |         |
|----------------|-------|-------|---------|----------|---------|---------|---------|---------|---------|---------|---------|---------|
| c4mim-dca-p2   | -73.7 | -68.5 | -1861.7 | -5715.9  | -1163.6 | -3801.6 | -664.8  | -1874.0 | -1163.6 | -3803.1 | -664.8  | -1877.6 |
| c4mim-dca-p3   | -68.3 | -64.0 | -1858.1 | -5712.4  | -1162.9 | -3800.7 | -664.7  | -1874.0 | -1162.9 | -3802.1 | -664.6  | -1876.9 |
| c4mim-mes-p1   | -58.4 | -51.3 | -2003.9 | -6187.3  | -1164.4 | -3802.7 | -812.8  | -2353.0 | -1164.4 | -3804.4 | -812.9  | -2358.3 |
| c4mim-mes-p2   | -49.4 | -43.4 | -1998.4 | -6180.6  | -1163.1 | -3800.6 | -812.8  | -2353.1 | -1163.1 | -3802.2 | -812.9  | -2357.5 |
| c4mim-pf6-p1   | -47.8 | -40.1 | -2497.3 | -7510.5  | -1163.4 | -3801.2 | -1313.6 | -3681.8 | -1163.4 | -3802.7 | -1313.8 | -3687.8 |
| c4mim-pf6-p2   | -40.4 | -34.1 | -2493.2 | -7505.2  | -1162.7 | -3800.0 | -1313.6 | -3681.8 | -1162.7 | -3801.3 | -1313.8 | -3686.6 |
| c4mim-tos-p1   | -60.2 | -52.4 | -2689.5 | -8171.6  | -1164.2 | -3802.5 | -1497.9 | -4336.3 | -1164.2 | -3804.4 | -1498.0 | -4342.0 |
| c4mim-tos-p2   | -55.6 | -48.5 | -2687.5 | -8168.8  | -1164.2 | -3802.3 | -1497.9 | -4336.3 | -1164.2 | -3804.2 | -1498.0 | -4341.5 |
| c4mpyr-bf4-p1  | -38.1 | -31.8 | -1996.8 | -6379.2  | -1122.1 | -3927.6 | -858.4  | -2429.7 | -1122.0 | -3928.5 | -858.7  | -2434.9 |
| c4mpyr-bf4-p2  | -35.5 | -29.7 | -1996.1 | -6378.0  | -1122.5 | -3928.0 | -858.4  | -2429.8 | -1122.4 | -3928.8 | -858.6  | -2434.5 |
| c4mpyr-bf4-p3  | -35.6 | -29.6 | -1995.8 | -6378.1  | -1122.2 | -3927.9 | -858.4  | -2429.8 | -1122.2 | -3928.7 | -858.7  | -2434.7 |
| c4mpyr-br-p1   | -67.3 | -47.6 | -1367.6 | -4487.5  | -1122.8 | -3928.6 | -216.3  | -520.1  | -1122.8 | -3929.0 | -221.2  | -534.5  |
| c4mpyr-br-p2   | -64.0 | -44.9 | -1365.8 | -4485.7  | -1122.6 | -3928.6 | -216.3  | -520.1  | -1122.6 | -3929.0 | -221.0  | -533.9  |
| c4mpyr-br-p3   | -64.3 | -45.4 | -1366.1 | -4486.0  | -1122.7 | -3928.7 | -216.3  | -520.1  | -1122.7 | -3929.1 | -221.0  | -533.9  |
| c4mpyr-cl-p1   | -46.0 | -40.6 | -1288.9 | -4405.9  | -1122.8 | -3928.6 | -145.7  | -451.7  | -1122.8 | -3929.0 | -145.8  | -456.8  |
| c4mpyr-cl-p2   | -45.3 | -39.8 | -1288.4 | -4405.8  | -1122.6 | -3928.9 | -145.7  | -451.7  | -1122.6 | -3929.3 | -145.8  | -456.8  |
| c4mpyr-cl-p3   | -44.5 | -39.1 | -1288.1 | -4405.4  | -1122.8 | -3928.8 | -145.7  | -451.7  | -1122.8 | -3929.1 | -145.8  | -456.7  |
| c4mpyr-dca-p1  | -47.1 | -43.7 | -1802.5 | -5813.8  | -1122.3 | -3927.8 | -659.1  | -1860.0 | -1122.2 | -3928.5 | -659.0  | -1862.9 |
| c4mpyr-dca-p2  | -49.8 | -46.0 | -1804.3 | -5814.9  | -1122.3 | -3928.1 | -659.1  | -1859.9 | -1122.2 | -3928.8 | -659.1  | -1863.1 |
| c4mpyr-dca-p3  | -48.1 | -44.4 | -1803.8 | -5813.6  | -1122.3 | -3928.0 | -659.1  | -1859.8 | -1122.2 | -3928.8 | -659.1  | -1862.8 |
| c4mpyr-dca-p4  | -49.0 | -45.4 | -1803.5 | -5814.7  | -1122.3 | -3928.0 | -659.1  | -1859.9 | -1122.1 | -3928.7 | -659.1  | -1863.0 |
| c4mpyr-dca-p5  | -50.2 | -46.8 | -1804.3 | -5815.1  | -1122.3 | -3927.9 | -659.1  | -1859.9 | -1122.2 | -3928.7 | -659.0  | -1862.7 |
| c4mpyr-mes-p1  | -46.6 | -40.0 | -1956.0 | -6307.5  | -1122.1 | -3927.9 | -812.8  | -2354.0 | -1122.0 | -3928.9 | -812.9  | -2359.6 |
| c4mpyr-mes-p2  | -42.8 | -36.6 | -1954.9 | -6306.1  | -1122.8 | -3928.5 | -812.8  | -2354.1 | -1122.7 | -3929.4 | -812.9  | -2359.3 |
| c4mpyr-mes-p3  | -42.0 | -35.8 | -1954.1 | -6305.3  | -1122.3 | -3928.3 | -812.8  | -2354.0 | -1122.3 | -3929.3 | -812.9  | -2359.1 |
| c4mpyr-ntf2-p1 | -58.3 | -48.8 | -3735.5 | -11115.1 | -1122.5 | -3927.8 | -2588.8 | -7153.2 | -1122.3 | -3929.0 | -2589.2 | -7161.2 |
| c4mpyr-ntf2-p2 | -50.1 | -41.5 | -3732.0 | -11107.8 | -1122.1 | -3927.5 | -2588.5 | -7151.7 | -1122.0 | -3928.7 | -2588.8 | -7158.9 |
| c4mpyr-ntf2-p3 | -56.2 | -47.1 | -3734.5 | -11113.7 | -1122.2 | -3927.8 | -2588.8 | -7153.2 | -1122.1 | -3928.9 | -2589.2 | -7160.9 |
| c4mpyr-ntf2-p4 | -57.1 | -47.6 | -3734.8 | -11114.3 | -1122.3 | -3927.8 | -2588.8 | -7153.1 | -1122.2 | -3929.0 | -2589.2 | -7161.0 |
| c4mpyr-ntf2-p5 | -47.1 | -39.3 | -3730.6 | -11106.1 | -1121.9 | -3927.4 | -2588.4 | -7151.9 | -1121.8 | -3928.5 | -2588.7 | -7158.4 |
| c4mpyr-ntf2-p6 | -47.5 | -39.5 | -3731.3 | -11106.8 | -1122.3 | -3927.8 | -2588.5 | -7151.9 | -1122.2 | -3928.9 | -2588.8 | -7158.7 |
| c4mpyr-pf6-p1  | -39.7 | -32.4 | -2452.2 | -7632.9  | -1122.0 | -3927.5 | -1313.7 | -3682.2 | -1122.0 | -3928.4 | -1314.0 | -3688.4 |
| c4mpyr-pf6-p2  | -36.6 | -29.8 | -2451.3 | -7631.4  | -1122.3 | -3927.8 | -1313.7 | -3682.2 | -1122.3 | -3928.6 | -1314.0 | -3687.9 |
| c4mpyr-pf6-p3  | -36.7 | -29.8 | -2451.0 | -7631.6  | -1122.2 | -3927.7 | -1313.7 | -3682.2 | -1122.1 | -3928.5 | -1314.0 | -3688.1 |
| c4mpyr-tos-p1  | -45.3 | -38.3 | -2640.1 | -8289.7  | -1122.2 | -3928.0 | -1497.4 | -4337.0 | -1122.1 | -3929.1 | -1497.6 | -4342.8 |
| c4mpyr-tos-p2  | -41.4 | -35.0 | -2638.9 | -8288.1  | -1122.8 | -3928.4 | -1497.4 | -4337.0 | -1122.7 | -3929.4 | -1497.6 | -4342.4 |



### 2.3.3 T→Q

Table S 22: Raw CBS (T→Q) energies. Superscript \* indicates monomer calculated in the dimer basis set.

| ion pair       | E(int) | E(int) CP | E(dimer) SS | E(dimer) OS | E(A) SS | E(A) OS | E(B) SS | E(B) OS | E(A) SS* | E(A) OS* | E(B) SS* | E(B) OS* |
|----------------|--------|-----------|-------------|-------------|---------|---------|---------|---------|----------|----------|----------|----------|
| clmim-bf4-p1   | -33.9  | -32.4     | -1703.8     | -5309.3     | -828.5  | -2725.1 | -859.1  | -2566.4 | -828.5   | -2725.2  | -859.3   | -2567.7  |
| clmim-br-p1    | -52.6  | -47.9     | -1138.7     | -3432.9     | -830.5  | -2732.2 | -283.3  | -673.0  | -830.5   | -2732.4  | -284.5   | -676.4   |
| clmim-br-p2    | -34.3  | -30.1     | -1130.2     | -3422.4     | -830.1  | -2731.9 | -283.3  | -673.0  | -830.1   | -2732.0  | -284.4   | -676.0   |
| clmim-cl-p1    | -41.9  | -39.7     | -994.7      | -3235.6     | -830.3  | -2732.0 | -144.1  | -482.1  | -830.3   | -2732.1  | -144.4   | -483.8   |
| clmim-cl-p2    | -29.6  | -27.7     | -989.7      | -3229.0     | -830.4  | -2732.5 | -144.1  | -482.1  | -830.4   | -2732.6  | -144.3   | -483.7   |
| clmim-dca-p1   | -64.2  | -63.0     | -1522.9     | -4701.2     | -829.0  | -2726.3 | -663.4  | -1941.2 | -829.0   | -2726.5  | -663.5   | -1942.2  |
| clmim-dca-p2   | -47.1  | -45.9     | -1514.9     | -4692.7     | -829.1  | -2727.2 | -663.1  | -1941.2 | -829.0   | -2727.3  | -663.2   | -1942.2  |
| clmim-mes-p1   | -46.2  | -44.4     | -1666.6     | -5210.1     | -829.1  | -2726.0 | -814.6  | -2460.8 | -829.0   | -2726.2  | -814.7   | -2462.3  |
| clmim-ntf2-p1  | -72.1  | -70.2     | -3459.1     | -10283.3    | -828.6  | -2725.2 | -2596.6 | -7520.0 | -828.5   | -2725.5  | -2596.6  | -7521.6  |
| clmim-ntf2-p2  | -38.5  | -36.6     | -3443.8     | -10264.4    | -828.8  | -2726.7 | -2595.8 | -7518.3 | -828.8   | -2726.9  | -2595.9  | -7519.8  |
| clmim-ntf2-p3  | -43.5  | -41.8     | -3447.1     | -10266.5    | -828.6  | -2725.8 | -2596.6 | -7519.1 | -828.5   | -2726.1  | -2596.6  | -7520.5  |
| clmim-pf6-p1   | -36.2  | -34.9     | -2162.0     | -6632.4     | -828.5  | -2725.2 | -1316.3 | -3888.2 | -828.5   | -2725.4  | -1316.3  | -3889.4  |
| clmim-tos-p1   | -43.5  | -42.2     | -2349.1     | -7256.4     | -828.7  | -2725.7 | -1498.7 | -4508.9 | -828.7   | -2726.0  | -1498.6  | -4510.0  |
| clmpyr-bf4-p1  | -33.1  | -31.4     | -1658.5     | -5419.8     | -783.6  | -2837.7 | -858.8  | -2565.0 | -783.6   | -2837.8  | -858.9   | -2566.4  |
| clmpyr-bf4-p2  | -30.6  | -28.9     | -1657.2     | -5418.8     | -783.8  | -2837.9 | -858.8  | -2565.0 | -783.8   | -2838.0  | -859.0   | -2566.4  |
| clmpyr-br-p1   | -52.0  | -47.3     | -1091.9     | -3539.4     | -784.3  | -2838.7 | -283.3  | -673.0  | -784.3   | -2838.8  | -284.5   | -676.4   |
| clmpyr-br-p2   | -49.6  | -45.0     | -1090.7     | -3538.4     | -784.3  | -2838.9 | -283.3  | -673.0  | -784.3   | -2839.0  | -284.4   | -676.3   |
| clmpyr-cl-p1   | -43.5  | -41.4     | -949.2      | -3343.6     | -784.4  | -2838.8 | -144.1  | -482.1  | -784.4   | -2838.9  | -144.4   | -483.8   |
| clmpyr-cl-p2   | -42.3  | -40.3     | -948.6      | -3343.2     | -784.4  | -2838.9 | -144.1  | -482.1  | -784.4   | -2839.0  | -144.3   | -483.7   |
| clmpyr-dca-p1  | -43.8  | -42.9     | -1463.5     | -4788.1     | -784.2  | -2838.4 | -657.7  | -1927.5 | -784.2   | -2838.5  | -657.7   | -1928.3  |
| clmpyr-dca-p2  | -47.9  | -46.9     | -1464.7     | -4790.8     | -784.0  | -2838.1 | -657.6  | -1927.8 | -784.0   | -2838.3  | -657.6   | -1928.7  |
| clmpyr-dca-p3  | -44.2  | -43.2     | -1461.5     | -4790.1     | -783.7  | -2837.9 | -657.5  | -1928.2 | -783.7   | -2838.0  | -657.5   | -1929.1  |
| clmpyr-dca-p4  | -46.3  | -45.3     | -1463.6     | -4789.8     | -783.7  | -2837.9 | -657.6  | -1927.8 | -783.7   | -2838.0  | -657.7   | -1928.7  |
| clmpyr-mes-p1  | -41.2  | -39.4     | -1619.0     | -5320.1     | -783.6  | -2838.0 | -814.6  | -2461.7 | -783.6   | -2838.1  | -814.7   | -2463.3  |
| clmpyr-mes-p2  | -36.3  | -34.6     | -1616.8     | -5317.9     | -783.8  | -2838.3 | -814.6  | -2461.7 | -783.9   | -2838.5  | -814.7   | -2463.1  |
| clmpyr-ntf2-p1 | -48.0  | -46.3     | -3401.5     | -10381.8    | -784.0  | -2837.8 | -2594.9 | -7518.7 | -784.0   | -2838.0  | -2595.0  | -7520.2  |
| clmpyr-ntf2-p2 | -37.2  | -36.0     | -3397.0     | -10374.4    | -783.7  | -2837.6 | -2594.9 | -7517.9 | -783.7   | -2837.7  | -2594.9  | -7519.1  |
| clmpyr-ntf2-p3 | -46.4  | -44.7     | -3400.7     | -10380.8    | -784.0  | -2837.9 | -2594.8 | -7518.4 | -784.0   | -2838.1  | -2594.9  | -7519.8  |
| clmpyr-ntf2-p5 | -38.5  | -37.3     | -3397.7     | -10375.0    | -783.9  | -2837.8 | -2594.8 | -7517.6 | -783.9   | -2837.9  | -2594.7  | -7518.8  |
| clmpyr-pf6-p1  | -33.2  | -31.6     | -2116.1     | -6743.5     | -783.6  | -2837.7 | -1316.4 | -3888.6 | -783.7   | -2837.8  | -1316.5  | -3890.0  |
| clmpyr-pf6-p2  | -30.9  | -29.2     | -2114.9     | -6742.6     | -783.8  | -2837.8 | -1316.4 | -3888.7 | -783.8   | -2837.9  | -1316.6  | -3890.0  |
| clmpyr-tos-p1  | -38.4  | -37.0     | -2301.6     | -7366.0     | -783.7  | -2838.0 | -1498.1 | -4509.4 | -783.7   | -2838.1  | -1498.1  | -4510.7  |
| clmpyr-tos-p2  | -33.5  | -32.2     | -2298.8     | -7363.9     | -783.8  | -2838.1 | -1498.1 | -4509.3 | -783.8   | -2838.3  | -1498.0  | -4510.5  |



|               |       |       |         |          |        |         |         |         |        |         |         |         |
|---------------|-------|-------|---------|----------|--------|---------|---------|---------|--------|---------|---------|---------|
| c2mim-bf4-p1  | -36.1 | -34.3 | -1816.0 | -5708.0  | -939.5 | -3122.9 | -859.1  | -2566.4 | -939.5 | -3123.0 | -859.3  | -2567.8 |
| c2mim-bf4-p2  | -33.5 | -31.8 | -1814.1 | -5706.2  | -939.1 | -3122.2 | -859.1  | -2566.4 | -939.0 | -3122.4 | -859.3  | -2567.8 |
| c2mim-br-p1   | -54.5 | -49.4 | -1249.8 | -3831.2  | -940.9 | -3129.3 | -283.3  | -673.0  | -940.9 | -3129.4 | -284.7  | -676.7  |
| c2mim-br-p2   | -38.8 | -33.9 | -1244.0 | -3823.9  | -941.8 | -3131.0 | -283.3  | -673.0  | -941.8 | -3131.1 | -284.6  | -676.5  |
| c2mim-br-p3   | -39.1 | -34.5 | -1243.4 | -3823.1  | -941.1 | -3130.1 | -283.3  | -673.0  | -941.1 | -3130.1 | -284.5  | -676.3  |
| c2mim-br-p4   | -54.1 | -49.2 | -1250.5 | -3832.0  | -941.6 | -3130.5 | -283.3  | -673.0  | -941.6 | -3130.6 | -284.6  | -676.5  |
| c2mim-cl-p1   | -43.8 | -41.4 | -1106.0 | -3634.0  | -940.8 | -3129.2 | -144.1  | -482.1  | -940.8 | -3129.3 | -144.5  | -484.0  |
| c2mim-cl-p2   | -32.4 | -30.2 | -1102.7 | -3629.5  | -942.1 | -3131.6 | -144.1  | -482.1  | -942.1 | -3131.7 | -144.4  | -483.9  |
| c2mim-cl-p3   | -33.1 | -31.0 | -1102.2 | -3628.9  | -941.3 | -3130.5 | -144.1  | -482.1  | -941.3 | -3130.6 | -144.4  | -483.8  |
| c2mim-cl-p4   | -42.9 | -40.6 | -1106.2 | -3634.3  | -941.4 | -3130.1 | -144.1  | -482.1  | -941.3 | -3130.2 | -144.4  | -483.9  |
| c2mim-dca-p1  | -65.7 | -64.3 | -1633.7 | -5099.3  | -939.4 | -3123.1 | -663.3  | -1941.5 | -939.4 | -3123.3 | -663.4  | -1942.7 |
| c2mim-dca-p2  | -61.7 | -60.4 | -1632.3 | -5096.9  | -939.6 | -3123.2 | -663.4  | -1941.4 | -939.6 | -3123.4 | -663.5  | -1942.4 |
| c2mim-dca-p3  | -65.9 | -64.6 | -1635.0 | -5099.9  | -940.2 | -3123.9 | -663.5  | -1941.3 | -940.2 | -3124.1 | -663.6  | -1942.4 |
| c2mim-dca-p4  | -62.9 | -61.5 | -1632.7 | -5097.6  | -939.5 | -3123.2 | -663.4  | -1941.3 | -939.5 | -3123.4 | -663.5  | -1942.4 |
| c2mim-dca-p5  | -64.2 | -63.0 | -1633.4 | -5098.3  | -939.5 | -3123.3 | -663.5  | -1941.2 | -939.5 | -3123.5 | -663.5  | -1942.2 |
| c2mim-dca-p6  | -64.7 | -63.4 | -1633.2 | -5098.5  | -939.4 | -3122.9 | -663.5  | -1941.3 | -939.3 | -3123.1 | -663.5  | -1942.3 |
| c2mim-mes-p1  | -51.9 | -49.8 | -1780.5 | -5611.0  | -940.3 | -3124.1 | -814.6  | -2460.7 | -940.3 | -3124.3 | -814.7  | -2462.4 |
| c2mim-mes-p2  | -46.6 | -44.8 | -1777.1 | -5607.4  | -939.5 | -3122.9 | -814.6  | -2460.8 | -939.4 | -3123.1 | -814.7  | -2462.4 |
| c2mim-ntf2-p1 | -78.2 | -76.1 | -3573.1 | -10684.3 | -939.6 | -3123.0 | -2596.6 | -7519.9 | -939.6 | -3123.3 | -2596.6 | -7521.7 |
| c2mim-ntf2-p2 | -49.0 | -46.9 | -3559.9 | -10668.6 | -939.8 | -3124.3 | -2596.2 | -7519.2 | -939.8 | -3124.6 | -2596.2 | -7520.9 |
| c2mim-ntf2-p3 | -46.7 | -44.9 | -3559.6 | -10665.4 | -939.3 | -3123.3 | -2596.6 | -7519.0 | -939.3 | -3123.5 | -2596.7 | -7520.7 |
| c2mim-ntf2-p4 | -68.7 | -66.8 | -3569.0 | -10679.2 | -939.5 | -3122.9 | -2596.9 | -7520.2 | -939.5 | -3123.2 | -2596.9 | -7521.9 |
| c2mim-pf6-p1  | -40.0 | -38.5 | -2274.8 | -7031.9  | -939.4 | -3122.8 | -1316.3 | -3888.2 | -939.4 | -3123.0 | -1316.3 | -3889.6 |
| c2mim-pf6-p2  | -36.3 | -34.9 | -2272.5 | -7029.6  | -939.0 | -3122.2 | -1316.3 | -3888.3 | -939.0 | -3122.4 | -1316.3 | -3889.4 |
| c2mim-tos-p1  | -50.8 | -49.3 | -2464.1 | -7658.1  | -940.1 | -3123.9 | -1498.6 | -4508.7 | -940.1 | -3124.0 | -1498.6 | -4510.1 |
| c2mim-tos-p2  | -44.5 | -43.1 | -2460.3 | -7654.1  | -939.5 | -3123.0 | -1498.7 | -4508.8 | -939.4 | -3123.2 | -1498.6 | -4510.1 |
| c2mpyr-bf4-p1 | -33.5 | -31.8 | -1771.3 | -5820.3  | -896.3 | -3238.0 | -858.8  | -2565.0 | -896.3 | -3238.1 | -858.9  | -2566.4 |
| c2mpyr-bf4-p2 | -31.3 | -29.9 | -1770.8 | -5819.5  | -896.8 | -3238.4 | -858.8  | -2565.1 | -896.8 | -3238.5 | -858.9  | -2566.3 |
| c2mpyr-bf4-p3 | -31.1 | -29.5 | -1770.1 | -5819.3  | -896.4 | -3238.1 | -858.8  | -2565.0 | -896.4 | -3238.2 | -858.9  | -2566.4 |
| c2mpyr-br-p1  | -53.0 | -48.0 | -1205.0 | -3940.2  | -897.0 | -3238.9 | -283.3  | -673.0  | -897.0 | -3239.0 | -284.6  | -676.6  |
| c2mpyr-br-p2  | -51.1 | -46.3 | -1204.1 | -3939.6  | -896.9 | -3239.3 | -283.3  | -673.0  | -896.9 | -3239.4 | -284.5  | -676.4  |
| c2mpyr-br-p3  | -50.6 | -45.8 | -1203.6 | -3939.1  | -896.9 | -3239.0 | -283.3  | -673.0  | -896.9 | -3239.1 | -284.5  | -676.4  |
| c2mpyr-cl-p1  | -44.0 | -41.7 | -1062.1 | -3744.1  | -897.1 | -3239.0 | -144.1  | -482.1  | -897.1 | -3239.1 | -144.4  | -483.9  |
| c2mpyr-cl-p2  | -42.7 | -40.6 | -1061.2 | -3743.5  | -896.8 | -3239.1 | -144.1  | -482.1  | -896.8 | -3239.2 | -144.4  | -483.7  |
| c2mpyr-cl-p3  | -42.6 | -40.4 | -1061.3 | -3743.6  | -897.0 | -3239.1 | -144.1  | -482.1  | -897.0 | -3239.2 | -144.4  | -483.8  |
| c2mpyr-dca-p1 | -43.9 | -42.9 | -1576.1 | -5188.4  | -896.8 | -3238.6 | -657.7  | -1927.6 | -896.8 | -3238.7 | -657.7  | -1928.4 |
| c2mpyr-dca-p2 | -47.5 | -46.4 | -1577.3 | -5190.6  | -896.5 | -3238.3 | -657.7  | -1927.9 | -896.5 | -3238.4 | -657.7  | -1928.8 |
| c2mpyr-dca-p3 | -48.3 | -47.2 | -1577.4 | -5191.1  | -896.5 | -3238.2 | -657.6  | -1927.8 | -896.5 | -3238.4 | -657.6  | -1928.7 |
| c2mpyr-mes-p1 | -42.3 | -40.5 | -1732.2 | -5721.1  | -896.3 | -3238.3 | -814.6  | -2461.7 | -896.3 | -3238.4 | -814.7  | -2463.3 |



|                |       |       |         |          |         |         |         |         |         |         |         |         |
|----------------|-------|-------|---------|----------|---------|---------|---------|---------|---------|---------|---------|---------|
| c2mpyr-mes-p2  | -38.8 | -37.2 | -1731.1 | -5719.9  | -897.0  | -3238.8 | -814.6  | -2461.8 | -897.0  | -3238.9 | -814.7  | -2463.3 |
| c2mpyr-mes-p3  | -37.7 | -35.9 | -1730.0 | -5719.0  | -896.5  | -3238.5 | -814.6  | -2461.7 | -896.5  | -3238.7 | -814.7  | -2463.2 |
| c2mpyr-ntf2-p1 | -49.4 | -47.5 | -3515.1 | -10782.8 | -896.7  | -3238.0 | -2595.1 | -7518.8 | -896.7  | -3238.1 | -2595.2 | -7520.4 |
| c2mpyr-ntf2-p2 | -39.2 | -37.9 | -3510.6 | -10775.7 | -896.3  | -3237.8 | -2594.9 | -7518.0 | -896.3  | -3237.9 | -2594.9 | -7519.3 |
| c2mpyr-ntf2-p3 | -48.1 | -46.4 | -3514.3 | -10782.0 | -896.5  | -3238.0 | -2595.0 | -7518.7 | -896.5  | -3238.2 | -2595.0 | -7520.2 |
| c2mpyr-ntf2-p4 | -47.0 | -45.3 | -3513.7 | -10781.6 | -896.5  | -3238.0 | -2595.0 | -7518.7 | -896.5  | -3238.2 | -2595.1 | -7520.2 |
| c2mpyr-ntf2-p5 | -40.8 | -39.6 | -3511.1 | -10776.3 | -896.1  | -3237.8 | -2594.8 | -7517.8 | -896.2  | -3237.9 | -2594.7 | -7519.0 |
| c2mpyr-ntf2-p6 | -38.7 | -37.4 | -3510.5 | -10775.6 | -896.5  | -3238.0 | -2595.0 | -7518.0 | -896.5  | -3238.2 | -2594.9 | -7519.2 |
| c2mpyr-pf6-p1  | -33.4 | -31.9 | -2229.1 | -7144.0  | -896.5  | -3238.1 | -1316.4 | -3888.6 | -896.5  | -3238.2 | -1316.5 | -3889.9 |
| c2mpyr-pf6-p2  | -31.5 | -30.1 | -2228.2 | -7143.1  | -896.6  | -3238.1 | -1316.4 | -3888.7 | -896.6  | -3238.2 | -1316.5 | -3889.9 |
| c2mpyr-pf6-p3  | -31.3 | -29.6 | -2227.8 | -7143.0  | -896.4  | -3238.0 | -1316.4 | -3888.7 | -896.4  | -3238.1 | -1316.6 | -3890.1 |
| c2mpyr-tos-p1  | -39.7 | -38.3 | -2414.8 | -7767.1  | -896.3  | -3238.2 | -1498.2 | -4509.4 | -896.3  | -3238.4 | -1498.1 | -4510.7 |
| c2mpyr-tos-p2  | -36.4 | -35.2 | -2413.6 | -7765.9  | -897.0  | -3238.7 | -1498.1 | -4509.4 | -897.0  | -3238.9 | -1498.0 | -4510.6 |
| c3mim-bf4-p1   | -36.8 | -35.0 | -1926.0 | -6105.2  | -1049.1 | -3519.6 | -859.1  | -2566.4 | -1049.1 | -3519.7 | -859.4  | -2567.9 |
| c3mim-bf4-p2   | -35.7 | -34.0 | -1925.4 | -6104.7  | -1049.2 | -3519.6 | -859.1  | -2566.4 | -1049.1 | -3519.7 | -859.3  | -2567.8 |
| c3mim-br-p1    | -55.3 | -49.9 | -1359.8 | -4228.8  | -1050.5 | -3526.5 | -283.3  | -673.0  | -1050.5 | -3526.6 | -284.7  | -676.8  |
| c3mim-br-p2    | -39.4 | -34.3 | -1353.6 | -4221.2  | -1051.2 | -3528.0 | -283.3  | -673.0  | -1051.2 | -3528.1 | -284.6  | -676.6  |
| c3mim-br-p3    | -43.8 | -38.9 | -1355.4 | -4222.9  | -1050.8 | -3527.3 | -283.3  | -673.0  | -1050.8 | -3527.4 | -284.6  | -676.5  |
| c3mim-br-p4    | -55.7 | -50.5 | -1360.5 | -4229.6  | -1050.8 | -3527.2 | -283.3  | -673.0  | -1050.8 | -3527.4 | -284.7  | -676.7  |
| c3mim-cl-p1    | -44.2 | -41.8 | -1215.8 | -4031.3  | -1050.4 | -3526.3 | -144.1  | -482.1  | -1050.4 | -3526.4 | -144.5  | -484.0  |
| c3mim-cl-p2    | -32.6 | -30.3 | -1212.1 | -4026.6  | -1051.5 | -3528.5 | -144.1  | -482.1  | -1051.5 | -3528.6 | -144.4  | -483.9  |
| c3mim-cl-p3    | -36.3 | -34.1 | -1213.4 | -4027.8  | -1051.0 | -3527.7 | -144.1  | -482.1  | -1051.0 | -3527.8 | -144.4  | -483.9  |
| c3mim-cl-p4    | -43.6 | -41.3 | -1215.8 | -4031.5  | -1050.6 | -3526.9 | -144.1  | -482.1  | -1050.6 | -3527.0 | -144.4  | -483.9  |
| c3mim-dca-p1   | -66.6 | -65.1 | -1743.8 | -5496.5  | -1049.0 | -3519.7 | -663.4  | -1941.5 | -1049.0 | -3519.9 | -663.4  | -1942.8 |
| c3mim-dca-p2   | -68.0 | -66.6 | -1744.7 | -5497.7  | -1049.4 | -3520.3 | -663.4  | -1941.4 | -1049.4 | -3520.5 | -663.5  | -1942.5 |
| c3mim-dca-p3   | -57.3 | -56.0 | -1740.0 | -5492.3  | -1049.4 | -3521.0 | -663.2  | -1941.4 | -1049.4 | -3521.2 | -663.2  | -1942.5 |
| c3mim-dca-p4   | -69.2 | -67.8 | -1745.5 | -5497.5  | -1049.2 | -3520.0 | -663.4  | -1941.3 | -1049.1 | -3520.1 | -663.5  | -1942.5 |
| c3mim-dca-p5   | -65.8 | -64.5 | -1742.7 | -5495.4  | -1048.6 | -3519.2 | -663.3  | -1941.3 | -1048.6 | -3519.4 | -663.4  | -1942.3 |
| c3mim-dca-p6   | -64.8 | -63.5 | -1742.5 | -5495.0  | -1048.7 | -3519.2 | -663.5  | -1941.3 | -1048.6 | -3519.4 | -663.6  | -1942.4 |
| c3mim-mes-p1   | -54.3 | -52.1 | -1891.5 | -6009.2  | -1050.0 | -3521.1 | -814.6  | -2460.7 | -1050.0 | -3521.2 | -814.8  | -2462.6 |
| c3mim-mes-p2   | -47.0 | -45.2 | -1886.6 | -6004.1  | -1048.9 | -3519.4 | -814.6  | -2460.8 | -1048.8 | -3519.6 | -814.7  | -2462.4 |
| c3mim-ntf2-p1  | -81.6 | -79.4 | -3684.3 | -11082.8 | -1049.2 | -3519.7 | -2596.7 | -7520.0 | -1049.1 | -3520.0 | -2596.6 | -7522.0 |
| c3mim-ntf2-p2  | -53.3 | -51.1 | -3671.5 | -11067.4 | -1049.4 | -3520.9 | -2596.2 | -7519.2 | -1049.4 | -3521.2 | -2596.3 | -7521.1 |
| c3mim-ntf2-p3  | -48.5 | -46.5 | -3670.0 | -11063.0 | -1048.9 | -3520.0 | -2596.6 | -7519.0 | -1048.8 | -3520.2 | -2596.7 | -7520.8 |
| c3mim-ntf2-p4  | -70.2 | -68.2 | -3678.7 | -11076.4 | -1048.7 | -3518.9 | -2596.9 | -7520.3 | -1048.7 | -3519.3 | -2596.9 | -7522.0 |
| c3mim-pf6-p1   | -41.0 | -39.4 | -2384.4 | -7428.9  | -1048.9 | -3519.2 | -1316.2 | -3888.1 | -1048.8 | -3519.4 | -1316.3 | -3889.4 |
| c3mim-pf6-p2   | -36.4 | -35.0 | -2381.9 | -7426.1  | -1048.4 | -3518.6 | -1316.3 | -3888.3 | -1048.4 | -3518.8 | -1316.3 | -3889.5 |
| c3mim-tos-p1   | -53.8 | -52.2 | -2575.2 | -8056.6  | -1049.8 | -3520.8 | -1498.7 | -4508.8 | -1049.8 | -3521.0 | -1498.6 | -4510.3 |
| c3mim-tos-p2   | -50.6 | -49.1 | -2573.4 | -8054.6  | -1049.6 | -3520.3 | -1498.7 | -4508.8 | -1049.5 | -3520.5 | -1498.6 | -4510.2 |



|                |       |       |         |          |         |         |         |         |         |         |         |         |
|----------------|-------|-------|---------|----------|---------|---------|---------|---------|---------|---------|---------|---------|
| c3mpyr-bf4-p1  | -33.9 | -32.2 | -1881.0 | -6217.7  | -1005.8 | -3635.2 | -858.8  | -2565.0 | -1005.8 | -3635.3 | -858.9  | -2566.5 |
| c3mpyr-bf4-p2  | -31.4 | -29.9 | -1880.2 | -6216.6  | -1006.1 | -3635.4 | -858.8  | -2565.0 | -1006.1 | -3635.5 | -858.9  | -2566.3 |
| c3mpyr-bf4-p3  | -31.5 | -29.7 | -1879.7 | -6216.6  | -1005.8 | -3635.2 | -858.8  | -2565.0 | -1005.8 | -3635.4 | -859.0  | -2566.4 |
| c3mpyr-br-p1   | -54.0 | -48.9 | -1314.9 | -4337.9  | -1006.5 | -3636.1 | -283.3  | -673.0  | -1006.5 | -3636.2 | -284.6  | -676.7  |
| c3mpyr-br-p2   | -50.6 | -45.9 | -1313.2 | -4336.0  | -1006.3 | -3636.0 | -283.3  | -673.0  | -1006.3 | -3636.1 | -284.5  | -676.3  |
| c3mpyr-br-p3   | -51.4 | -46.6 | -1313.5 | -4336.7  | -1006.4 | -3636.1 | -283.3  | -673.0  | -1006.4 | -3636.3 | -284.5  | -676.5  |
| c3mpyr-cl-p1   | -44.5 | -42.2 | -1171.7 | -4141.5  | -1006.5 | -3636.1 | -144.1  | -482.1  | -1006.5 | -3636.2 | -144.4  | -483.9  |
| c3mpyr-cl-p2   | -42.8 | -40.7 | -1170.7 | -4140.6  | -1006.2 | -3636.1 | -144.1  | -482.1  | -1006.2 | -3636.2 | -144.4  | -483.8  |
| c3mpyr-cl-p3   | -43.0 | -40.7 | -1170.9 | -4140.9  | -1006.5 | -3636.2 | -144.1  | -482.1  | -1006.5 | -3636.4 | -144.4  | -483.8  |
| c3mpyr-dca-p1  | -45.2 | -44.1 | -1686.0 | -5586.1  | -1006.0 | -3635.5 | -657.7  | -1927.8 | -1006.0 | -3635.6 | -657.8  | -1928.6 |
| c3mpyr-dca-p2  | -47.5 | -46.4 | -1686.7 | -5587.6  | -1005.9 | -3635.4 | -657.7  | -1927.9 | -1005.9 | -3635.5 | -657.7  | -1928.8 |
| c3mpyr-dca-p3  | -42.9 | -41.9 | -1683.3 | -5587.2  | -1006.0 | -3635.4 | -657.7  | -1928.5 | -1006.0 | -3635.5 | -657.7  | -1929.4 |
| c3mpyr-dca-p4  | -46.2 | -45.1 | -1686.0 | -5587.3  | -1006.2 | -3635.6 | -657.6  | -1927.7 | -1006.2 | -3635.7 | -657.6  | -1928.7 |
| c3mpyr-dca-p5  | -48.2 | -47.1 | -1686.8 | -5588.2  | -1006.0 | -3635.4 | -657.6  | -1927.8 | -1006.0 | -3635.5 | -657.7  | -1928.7 |
| c3mpyr-mes-p1  | -43.1 | -41.2 | -1841.9 | -6118.7  | -1005.8 | -3635.4 | -814.6  | -2461.7 | -1005.8 | -3635.6 | -814.7  | -2463.4 |
| c3mpyr-mes-p2  | -39.1 | -37.3 | -1840.6 | -6117.1  | -1006.4 | -3635.8 | -814.6  | -2461.8 | -1006.4 | -3636.0 | -814.7  | -2463.3 |
| c3mpyr-mes-p3  | -38.6 | -36.7 | -1839.9 | -6116.6  | -1006.0 | -3635.7 | -814.6  | -2461.7 | -1006.0 | -3635.9 | -814.7  | -2463.3 |
| c3mpyr-ntf2-p1 | -51.6 | -49.5 | -3625.6 | -11181.3 | -1006.2 | -3635.3 | -2595.0 | -7518.8 | -1006.2 | -3635.5 | -2595.2 | -7520.6 |
| c3mpyr-ntf2-p2 | -39.5 | -37.8 | -3620.3 | -11172.8 | -1005.8 | -3635.0 | -2594.9 | -7517.9 | -1005.8 | -3635.2 | -2595.0 | -7519.3 |
| c3mpyr-ntf2-p3 | -48.4 | -46.6 | -3623.8 | -11179.2 | -1005.8 | -3635.0 | -2595.0 | -7518.8 | -1005.8 | -3635.2 | -2595.1 | -7520.3 |
| c3mpyr-ntf2-p4 | -49.2 | -47.3 | -3624.2 | -11179.7 | -1005.9 | -3635.2 | -2594.9 | -7518.6 | -1005.9 | -3635.4 | -2595.0 | -7520.2 |
| c3mpyr-ntf2-p5 | -40.7 | -39.5 | -3620.4 | -11173.3 | -1005.6 | -3634.9 | -2594.8 | -7517.8 | -1005.6 | -3635.0 | -2594.7 | -7518.9 |
| c3mpyr-ntf2-p6 | -40.2 | -38.8 | -3620.7 | -11173.5 | -1006.0 | -3635.2 | -2594.9 | -7517.9 | -1006.0 | -3635.4 | -2594.8 | -7519.1 |
| c3mpyr-pf6-p1  | -34.7 | -32.9 | -2338.7 | -7541.6  | -1005.7 | -3635.0 | -1316.4 | -3888.6 | -1005.7 | -3635.1 | -1316.5 | -3890.1 |
| c3mpyr-pf6-p2  | -31.5 | -29.9 | -2337.5 | -7540.1  | -1006.0 | -3635.1 | -1316.4 | -3888.7 | -1006.0 | -3635.3 | -1316.5 | -3889.9 |
| c3mpyr-pf6-p3  | -31.9 | -30.1 | -2337.4 | -7540.4  | -1005.8 | -3635.1 | -1316.4 | -3888.7 | -1005.8 | -3635.2 | -1316.6 | -3890.1 |
| c3mpyr-tos-p1  | -40.7 | -39.2 | -2524.5 | -8164.7  | -1005.8 | -3635.4 | -1498.1 | -4509.3 | -1005.8 | -3635.5 | -1498.0 | -4510.7 |
| c3mpyr-tos-p2  | -36.7 | -35.3 | -2523.1 | -8163.1  | -1006.4 | -3635.8 | -1498.1 | -4509.3 | -1006.4 | -3635.9 | -1498.0 | -4510.6 |
| c4mim-bf4-p1   | -37.3 | -35.5 | -2035.7 | -6502.1  | -1158.6 | -3916.3 | -859.1  | -2566.4 | -1158.6 | -3916.4 | -859.4  | -2568.0 |
| c4mim-bf4-p2   | -35.9 | -34.2 | -2034.9 | -6501.3  | -1158.5 | -3916.2 | -859.1  | -2566.4 | -1158.5 | -3916.3 | -859.3  | -2567.9 |
| c4mim-br-p1    | -56.3 | -50.8 | -1469.7 | -4626.5  | -1159.9 | -3923.6 | -283.3  | -673.0  | -1159.9 | -3923.7 | -284.8  | -676.9  |
| c4mim-br-p2    | -40.5 | -35.2 | -1463.6 | -4619.0  | -1160.7 | -3925.1 | -283.3  | -673.0  | -1160.7 | -3925.2 | -284.7  | -676.8  |
| c4mim-br-p3    | -45.9 | -40.7 | -1465.8 | -4621.1  | -1160.3 | -3924.5 | -283.3  | -673.0  | -1160.3 | -3924.5 | -284.7  | -676.7  |
| c4mim-br-p4    | -56.2 | -51.0 | -1470.1 | -4626.8  | -1160.2 | -3924.2 | -283.3  | -673.0  | -1160.2 | -3924.3 | -284.7  | -676.8  |
| c4mim-cl-p1    | -44.8 | -42.4 | -1325.4 | -4428.7  | -1159.8 | -3923.4 | -144.1  | -482.1  | -1159.8 | -3923.5 | -144.5  | -484.1  |
| c4mim-cl-p2    | -33.2 | -30.8 | -1321.8 | -4424.0  | -1160.9 | -3925.6 | -144.1  | -482.1  | -1160.9 | -3925.7 | -144.4  | -484.0  |
| c4mim-cl-p3    | -37.7 | -35.4 | -1323.5 | -4425.6  | -1160.4 | -3924.8 | -144.1  | -482.1  | -1160.4 | -3924.9 | -144.4  | -484.0  |
| c4mim-cl-p4    | -44.0 | -41.7 | -1325.4 | -4428.6  | -1160.0 | -3923.8 | -144.1  | -482.1  | -1160.0 | -3923.9 | -144.4  | -483.9  |
| c4mim-dca-p1   | -67.3 | -65.8 | -1853.6 | -5893.6  | -1158.5 | -3916.4 | -663.4  | -1941.6 | -1158.5 | -3916.6 | -663.5  | -1942.8 |



|                |       |       |         |          |         |         |         |         |         |         |         |         |
|----------------|-------|-------|---------|----------|---------|---------|---------|---------|---------|---------|---------|---------|
| c4mim-dca-p2   | -70.7 | -69.3 | -1855.7 | -5895.1  | -1158.7 | -3916.7 | -663.4  | -1941.3 | -1158.6 | -3916.8 | -663.5  | -1942.5 |
| c4mim-dca-p3   | -66.1 | -64.7 | -1852.2 | -5892.2  | -1158.0 | -3915.8 | -663.3  | -1941.3 | -1158.0 | -3916.0 | -663.4  | -1942.4 |
| c4mim-mes-p1   | -55.4 | -53.2 | -2001.5 | -6406.4  | -1159.5 | -3917.7 | -814.6  | -2460.7 | -1159.4 | -3917.9 | -814.8  | -2462.6 |
| c4mim-mes-p2   | -47.1 | -45.2 | -1996.0 | -6400.6  | -1158.2 | -3915.8 | -814.6  | -2460.8 | -1158.2 | -3916.0 | -814.7  | -2462.4 |
| c4mim-pf6-p1   | -42.8 | -41.1 | -2495.3 | -7826.9  | -1158.5 | -3916.3 | -1316.3 | -3888.2 | -1158.5 | -3916.5 | -1316.3 | -3889.7 |
| c4mim-pf6-p2   | -36.4 | -35.0 | -2491.2 | -7822.7  | -1157.8 | -3915.1 | -1316.3 | -3888.3 | -1157.8 | -3915.3 | -1316.3 | -3889.5 |
| c4mim-tos-p1   | -55.9 | -54.3 | -2685.8 | -8454.4  | -1159.3 | -3917.5 | -1498.7 | -4508.8 | -1159.3 | -3917.7 | -1498.6 | -4510.4 |
| c4mim-tos-p2   | -51.8 | -50.2 | -2683.8 | -8452.1  | -1159.3 | -3917.4 | -1498.7 | -4508.8 | -1159.3 | -3917.6 | -1498.6 | -4510.3 |
| c4mpyr-bf4-p1  | -34.0 | -32.2 | -1990.3 | -6614.5  | -1115.1 | -4031.9 | -858.8  | -2565.0 | -1115.1 | -4032.0 | -858.9  | -2566.5 |
| c4mpyr-bf4-p2  | -31.6 | -30.0 | -1989.5 | -6613.5  | -1115.4 | -4032.2 | -858.8  | -2565.0 | -1115.4 | -4032.3 | -858.9  | -2566.4 |
| c4mpyr-bf4-p3  | -31.7 | -29.9 | -1989.1 | -6613.6  | -1115.2 | -4032.1 | -858.8  | -2565.0 | -1115.2 | -4032.2 | -859.0  | -2566.5 |
| c4mpyr-br-p1   | -54.2 | -49.1 | -1424.3 | -4734.9  | -1115.8 | -4032.9 | -283.3  | -673.0  | -1115.8 | -4033.0 | -284.6  | -676.7  |
| c4mpyr-br-p2   | -50.9 | -46.2 | -1422.6 | -4733.1  | -1115.6 | -4032.9 | -283.3  | -673.0  | -1115.6 | -4033.0 | -284.5  | -676.4  |
| c4mpyr-br-p3   | -51.7 | -46.8 | -1423.0 | -4733.7  | -1115.7 | -4032.9 | -283.3  | -673.0  | -1115.7 | -4033.1 | -284.6  | -676.5  |
| c4mpyr-cl-p1   | -44.5 | -42.1 | -1281.0 | -4538.3  | -1115.8 | -4032.9 | -144.1  | -482.1  | -1115.8 | -4033.0 | -144.4  | -483.9  |
| c4mpyr-cl-p2   | -43.4 | -41.2 | -1280.3 | -4537.9  | -1115.6 | -4033.1 | -144.1  | -482.1  | -1115.6 | -4033.2 | -144.4  | -483.9  |
| c4mpyr-cl-p3   | -42.9 | -40.7 | -1280.1 | -4537.7  | -1115.8 | -4033.0 | -144.1  | -482.1  | -1115.8 | -4033.1 | -144.4  | -483.8  |
| c4mpyr-dca-p1  | -45.2 | -44.0 | -1794.3 | -5983.6  | -1115.3 | -4032.0 | -657.6  | -1927.9 | -1115.3 | -4032.1 | -657.7  | -1928.9 |
| c4mpyr-dca-p2  | -47.4 | -46.3 | -1796.0 | -5984.5  | -1115.2 | -4032.2 | -657.7  | -1927.9 | -1115.2 | -4032.4 | -657.7  | -1928.8 |
| c4mpyr-dca-p3  | -45.9 | -44.9 | -1795.6 | -5983.3  | -1115.3 | -4032.2 | -657.7  | -1927.7 | -1115.3 | -4032.3 | -657.7  | -1928.6 |
| c4mpyr-dca-p4  | -46.9 | -45.7 | -1795.3 | -5984.5  | -1115.2 | -4032.2 | -657.7  | -1927.9 | -1115.2 | -4032.3 | -657.7  | -1928.8 |
| c4mpyr-dca-p5  | -48.3 | -47.2 | -1796.1 | -5985.1  | -1115.3 | -4032.1 | -657.6  | -1927.8 | -1115.3 | -4032.3 | -657.7  | -1928.8 |
| c4mpyr-mes-p1  | -43.1 | -41.2 | -1951.2 | -6515.5  | -1115.1 | -4032.2 | -814.6  | -2461.7 | -1115.1 | -4032.3 | -814.7  | -2463.4 |
| c4mpyr-mes-p2  | -39.6 | -37.7 | -1950.1 | -6514.3  | -1115.8 | -4032.7 | -814.6  | -2461.8 | -1115.8 | -4032.8 | -814.7  | -2463.4 |
| c4mpyr-mes-p3  | -38.8 | -36.9 | -1949.3 | -6513.6  | -1115.3 | -4032.5 | -814.6  | -2461.7 | -1115.3 | -4032.7 | -814.7  | -2463.3 |
| c4mpyr-ntf2-p1 | -51.6 | -49.5 | -3734.8 | -11578.0 | -1115.4 | -4032.0 | -2595.0 | -7518.7 | -1115.4 | -4032.2 | -2595.2 | -7520.5 |
| c4mpyr-ntf2-p2 | -44.0 | -42.4 | -3731.5 | -11571.7 | -1115.1 | -4031.8 | -2594.8 | -7517.6 | -1115.1 | -4031.9 | -2594.8 | -7519.0 |
| c4mpyr-ntf2-p3 | -49.6 | -47.7 | -3733.7 | -11576.7 | -1115.1 | -4032.0 | -2595.0 | -7518.7 | -1115.1 | -4032.1 | -2595.1 | -7520.3 |
| c4mpyr-ntf2-p4 | -50.2 | -48.3 | -3734.0 | -11577.1 | -1115.2 | -4032.0 | -2595.0 | -7518.7 | -1115.2 | -4032.2 | -2595.1 | -7520.3 |
| c4mpyr-ntf2-p5 | -41.4 | -40.1 | -3730.0 | -11570.5 | -1114.9 | -4031.7 | -2594.8 | -7517.8 | -1114.9 | -4031.8 | -2594.7 | -7519.0 |
| c4mpyr-ntf2-p6 | -41.7 | -40.3 | -3730.6 | -11571.0 | -1115.3 | -4032.0 | -2594.9 | -7517.8 | -1115.3 | -4032.2 | -2594.8 | -7519.1 |
| c4mpyr-pf6-p1  | -34.8 | -33.0 | -2448.1 | -7938.5  | -1115.0 | -4031.8 | -1316.4 | -3888.6 | -1115.0 | -4031.9 | -1316.6 | -3890.2 |
| c4mpyr-pf6-p2  | -31.9 | -30.3 | -2447.0 | -7937.2  | -1115.3 | -4032.0 | -1316.4 | -3888.7 | -1115.3 | -4032.1 | -1316.5 | -3890.0 |
| c4mpyr-pf6-p3  | -32.1 | -30.3 | -2446.8 | -7937.4  | -1115.1 | -4031.9 | -1316.4 | -3888.7 | -1115.1 | -4032.1 | -1316.6 | -3890.1 |
| c4mpyr-tos-p1  | -40.9 | -39.4 | -2634.0 | -8561.7  | -1115.2 | -4032.3 | -1498.1 | -4509.3 | -1115.2 | -4032.4 | -1498.1 | -4510.8 |
| c4mpyr-tos-p2  | -37.3 | -35.9 | -2632.8 | -8560.4  | -1115.7 | -4032.6 | -1498.2 | -4509.4 | -1115.7 | -4032.8 | -1498.1 | -4510.7 |



### 2.3.4 augmented T→Q

Table S 23: Raw CBS (augmented T→Q) energies. Superscript \* indicates monomer calculated in the dimer basis set.

| ion pair       | E(int) | E(int) CP | E(dimer) SS | E(dimer) OS | E(A) SS | E(A) OS | E(B) SS | E(B) OS | E(A) SS* | E(A) OS* | E(B) SS* | E(B) OS* |
|----------------|--------|-----------|-------------|-------------|---------|---------|---------|---------|----------|----------|----------|----------|
| clmim-bf4-p1   | -32.7  | -32.1     | -1699.8     | -5325.4     | -827.3  | -2730.0 | -856.9  | -2578.4 | -827.3   | -2729.9  | -856.8   | -2579.1  |
| clmim-br-p1    | -56.8  | -47.0     | -1139.5     | -3446.1     | -829.2  | -2737.1 | -284.0  | -678.5  | -829.2   | -2737.2  | -287.1   | -685.1   |
| clmim-br-p2    | -39.9  | -29.7     | -1131.5     | -3436.8     | -828.9  | -2737.0 | -284.0  | -678.5  | -828.9   | -2736.9  | -287.1   | -685.6   |
| clmim-cl-p1    | -39.1  | -38.2     | -992.1      | -3242.1     | -829.1  | -2736.8 | -143.9  | -485.3  | -829.0   | -2736.9  | -143.8   | -486.3   |
| clmim-cl-p2    | -28.2  | -26.6     | -987.4      | -3236.7     | -829.2  | -2737.5 | -143.9  | -485.3  | -829.2   | -2737.4  | -143.9   | -487.1   |
| clmim-dca-p1   | -63.4  | -62.6     | -1520.2     | -4712.5     | -827.8  | -2731.1 | -662.4  | -1948.0 | -827.7   | -2731.1  | -662.4   | -1948.9  |
| clmim-dca-p2   | -46.4  | -45.7     | -1512.3     | -4704.1     | -827.8  | -2732.0 | -662.1  | -1948.0 | -827.8   | -2731.9  | -662.0   | -1949.0  |
| clmim-mes-p1   | -44.3  | -43.4     | -1662.0     | -5224.1     | -827.8  | -2730.8 | -812.1  | -2471.1 | -827.8   | -2730.8  | -812.1   | -2472.0  |
| clmim-ntf2-p1  | -70.6  | -69.4     | -3448.8     | -10318.7    | -827.4  | -2730.1 | -2588.2 | -7551.3 | -827.2   | -2730.1  | -2588.1  | -7552.6  |
| clmim-ntf2-p2  | -37.6  | -36.3     | -3433.6     | -10300.1    | -827.6  | -2731.6 | -2587.4 | -7549.6 | -827.5   | -2731.5  | -2587.3  | -7551.1  |
| clmim-ntf2-p3  | -42.3  | -41.1     | -3436.9     | -10302.1    | -827.4  | -2730.7 | -2588.2 | -7550.4 | -827.3   | -2730.7  | -2588.2  | -7551.8  |
| clmim-pf6-p1   | -35.6  | -34.5     | -2155.5     | -6654.1     | -827.3  | -2730.0 | -1311.3 | -3905.3 | -827.3   | -2730.0  | -1311.4  | -3906.5  |
| clmim-tos-p1   | -42.0  | -41.4     | -2343.3     | -7274.3     | -827.5  | -2730.6 | -1494.7 | -4522.8 | -827.4   | -2730.5  | -1494.7  | -4523.6  |
| clmpyr-bf4-p1  | -32.1  | -31.2     | -1654.1     | -5434.4     | -782.0  | -2840.9 | -856.5  | -2577.0 | -782.0   | -2840.9  | -856.5   | -2578.0  |
| clmpyr-bf4-p2  | -29.7  | -28.8     | -1653.0     | -5433.5     | -782.2  | -2841.0 | -856.5  | -2577.0 | -782.2   | -2841.0  | -856.5   | -2578.0  |
| clmpyr-br-p1   | -57.4  | -46.5     | -1092.7     | -3551.8     | -782.7  | -2841.9 | -284.0  | -678.5  | -782.7   | -2841.9  | -287.4   | -685.9   |
| clmpyr-br-p2   | -54.4  | -44.4     | -1091.3     | -3550.4     | -782.7  | -2842.1 | -284.0  | -678.5  | -782.7   | -2842.1  | -287.1   | -685.3   |
| clmpyr-cl-p1   | -41.5  | -40.0     | -946.4      | -3349.1     | -782.8  | -2842.0 | -143.9  | -485.3  | -782.8   | -2842.0  | -143.8   | -486.8   |
| clmpyr-cl-p2   | -40.4  | -38.9     | -945.7      | -3348.8     | -782.8  | -2842.1 | -143.9  | -485.3  | -782.8   | -2842.1  | -143.8   | -486.8   |
| clmpyr-dca-p1  | -43.2  | -42.6     | -1460.5     | -4797.8     | -782.6  | -2841.6 | -656.6  | -1934.3 | -782.6   | -2841.5  | -656.6   | -1935.0  |
| clmpyr-dca-p2  | -47.3  | -46.6     | -1461.7     | -4800.4     | -782.4  | -2841.3 | -656.6  | -1934.6 | -782.4   | -2841.2  | -656.6   | -1935.4  |
| clmpyr-dca-p3  | -43.4  | -42.8     | -1458.4     | -4799.6     | -782.1  | -2841.1 | -656.4  | -1934.9 | -782.1   | -2841.1  | -656.4   | -1935.7  |
| clmpyr-dca-p4  | -45.6  | -45.0     | -1460.6     | -4799.4     | -782.1  | -2841.1 | -656.6  | -1934.6 | -782.1   | -2841.0  | -656.6   | -1935.4  |
| clmpyr-mes-p1  | -39.6  | -38.5     | -1614.1     | -5332.8     | -782.0  | -2841.2 | -812.0  | -2472.1 | -782.0   | -2841.1  | -812.0   | -2473.3  |
| clmpyr-mes-p2  | -35.1  | -33.9     | -1612.0     | -5330.8     | -782.2  | -2841.5 | -812.0  | -2472.0 | -782.2   | -2841.4  | -812.0   | -2473.3  |
| clmpyr-ntf2-p1 | -47.0  | -45.8     | -3391.0     | -10416.0    | -782.4  | -2841.0 | -2586.5 | -7550.1 | -782.3   | -2840.9  | -2586.4  | -7551.5  |
| clmpyr-ntf2-p2 | -36.6  | -35.3     | -3386.5     | -10408.7    | -782.1  | -2840.7 | -2586.5 | -7549.3 | -782.0   | -2840.7  | -2586.5  | -7550.7  |
| clmpyr-ntf2-p3 | -45.7  | -44.4     | -3390.3     | -10415.1    | -782.4  | -2841.1 | -2586.4 | -7549.9 | -782.3   | -2841.0  | -2586.3  | -7551.3  |
| clmpyr-ntf2-p5 | -38.1  | -36.6     | -3387.2     | -10409.5    | -782.3  | -2841.0 | -2586.3 | -7549.0 | -782.3   | -2841.0  | -2586.3  | -7550.5  |
| clmpyr-pf6-p1  | -32.5  | -31.2     | -2109.1     | -6763.5     | -782.1  | -2840.8 | -1311.5 | -3905.7 | -782.0   | -2840.8  | -1311.5  | -3907.0  |
| clmpyr-pf6-p2  | -30.2  | -28.9     | -2107.9     | -6762.7     | -782.2  | -2840.9 | -1311.5 | -3905.8 | -782.1   | -2840.9  | -1311.5  | -3907.1  |
| clmpyr-tos-p1  | -37.2  | -36.3     | -2295.5     | -7382.6     | -782.1  | -2841.2 | -1494.3 | -4523.4 | -782.0   | -2841.1  | -1494.2  | -4524.5  |
| clmpyr-tos-p2  | -32.5  | -31.6     | -2292.9     | -7380.6     | -782.2  | -2841.3 | -1494.2 | -4523.4 | -782.1   | -2841.2  | -1494.2  | -4524.4  |



|               |       |       |         |          |        |         |         |         |        |         |         |         |
|---------------|-------|-------|---------|----------|--------|---------|---------|---------|--------|---------|---------|---------|
| c2mim-bf4-p1  | -34.8 | -34.0 | -1811.7 | -5724.5  | -938.1 | -3128.1 | -856.8  | -2578.3 | -938.0 | -3128.2 | -856.8  | -2579.2 |
| c2mim-bf4-p2  | -32.3 | -31.6 | -1809.9 | -5722.7  | -937.6 | -3127.4 | -856.9  | -2578.4 | -937.6 | -3127.5 | -856.8  | -2579.1 |
| c2mim-br-p1   | -59.4 | -48.4 | -1250.6 | -3845.3  | -939.4 | -3134.6 | -284.0  | -678.5  | -939.4 | -3134.6 | -287.5  | -685.9  |
| c2mim-br-p2   | -45.2 | -33.4 | -1245.3 | -3839.2  | -940.4 | -3136.4 | -284.0  | -678.5  | -940.4 | -3136.3 | -287.7  | -686.7  |
| c2mim-br-p3   | -45.5 | -34.0 | -1244.6 | -3838.4  | -939.6 | -3135.4 | -284.0  | -678.5  | -939.6 | -3135.4 | -287.5  | -686.5  |
| c2mim-br-p4   | -58.6 | -48.2 | -1251.2 | -3845.9  | -940.1 | -3135.8 | -284.0  | -678.5  | -940.1 | -3135.9 | -287.3  | -685.5  |
| c2mim-cl-p1   | -41.1 | -40.0 | -1103.1 | -3641.0  | -939.4 | -3134.5 | -143.9  | -485.3  | -939.4 | -3134.5 | -143.8  | -486.5  |
| c2mim-cl-p2   | -30.6 | -29.0 | -1100.1 | -3637.3  | -940.7 | -3136.9 | -143.9  | -485.3  | -940.6 | -3136.9 | -143.8  | -487.1  |
| c2mim-cl-p3   | -31.5 | -29.8 | -1099.6 | -3636.8  | -939.9 | -3135.9 | -143.9  | -485.3  | -939.8 | -3135.9 | -143.9  | -487.1  |
| c2mim-cl-p4   | -40.1 | -39.1 | -1103.3 | -3641.3  | -939.9 | -3135.4 | -143.9  | -485.3  | -939.9 | -3135.5 | -143.8  | -486.3  |
| c2mim-dca-p1  | -64.6 | -63.9 | -1630.8 | -5110.9  | -938.0 | -3128.4 | -662.3  | -1948.4 | -937.9 | -3128.3 | -662.3  | -1949.3 |
| c2mim-dca-p2  | -60.8 | -60.1 | -1629.4 | -5108.6  | -938.2 | -3128.5 | -662.4  | -1948.2 | -938.1 | -3128.4 | -662.3  | -1949.1 |
| c2mim-dca-p3  | -65.0 | -64.2 | -1632.0 | -5111.6  | -938.7 | -3129.2 | -662.5  | -1948.2 | -938.7 | -3129.1 | -662.4  | -1949.1 |
| c2mim-dca-p4  | -61.9 | -61.2 | -1629.7 | -5109.2  | -938.1 | -3128.4 | -662.4  | -1948.1 | -938.0 | -3128.4 | -662.3  | -1949.0 |
| c2mim-dca-p5  | -63.4 | -62.6 | -1630.5 | -5110.0  | -938.0 | -3128.5 | -662.5  | -1948.0 | -938.0 | -3128.5 | -662.4  | -1948.9 |
| c2mim-dca-p6  | -63.6 | -62.9 | -1630.2 | -5110.1  | -937.9 | -3128.2 | -662.4  | -1948.1 | -937.8 | -3128.1 | -662.4  | -1949.0 |
| c2mim-mes-p1  | -49.6 | -48.7 | -1775.6 | -5625.2  | -938.9 | -3129.3 | -812.0  | -2471.0 | -938.8 | -3129.3 | -812.0  | -2472.0 |
| c2mim-mes-p2  | -44.8 | -43.8 | -1772.3 | -5621.8  | -938.0 | -3128.1 | -812.1  | -2471.1 | -937.9 | -3128.1 | -812.1  | -2472.1 |
| c2mim-ntf2-p1 | -76.8 | -75.3 | -3562.5 | -10720.1 | -938.2 | -3128.2 | -2588.2 | -7551.2 | -938.1 | -3128.3 | -2588.1 | -7552.8 |
| c2mim-ntf2-p2 | -47.9 | -46.5 | -3549.4 | -10704.6 | -938.4 | -3129.6 | -2587.7 | -7550.4 | -938.3 | -3129.5 | -2587.6 | -7552.1 |
| c2mim-ntf2-p3 | -45.6 | -44.1 | -3549.1 | -10701.5 | -937.9 | -3128.6 | -2588.2 | -7550.4 | -937.8 | -3128.6 | -2588.2 | -7552.0 |
| c2mim-ntf2-p4 | -67.4 | -66.0 | -3558.5 | -10715.1 | -938.1 | -3128.1 | -2588.5 | -7551.6 | -937.9 | -3128.2 | -2588.5 | -7553.0 |
| c2mim-pf6-p1  | -39.4 | -38.1 | -2268.0 | -7054.0  | -938.0 | -3128.0 | -1311.3 | -3905.3 | -937.9 | -3128.0 | -1311.4 | -3906.7 |
| c2mim-pf6-p2  | -35.6 | -34.6 | -2265.7 | -7051.6  | -937.6 | -3127.4 | -1311.3 | -3905.3 | -937.5 | -3127.4 | -1311.4 | -3906.5 |
| c2mim-tos-p1  | -49.0 | -48.3 | -2457.9 | -7676.1  | -938.7 | -3129.1 | -1494.7 | -4522.6 | -938.6 | -3129.0 | -1494.6 | -4523.5 |
| c2mim-tos-p2  | -43.1 | -42.4 | -2454.3 | -7672.3  | -938.0 | -3128.1 | -1494.7 | -4522.7 | -937.9 | -3128.1 | -1494.7 | -4523.6 |
| c2mpyr-bf4-p1 | -32.5 | -31.6 | -1766.7 | -5835.2  | -894.4 | -3241.5 | -856.5  | -2576.9 | -894.4 | -3241.4 | -856.5  | -2578.0 |
| c2mpyr-bf4-p2 | -30.6 | -29.7 | -1766.3 | -5834.7  | -895.0 | -3241.9 | -856.5  | -2577.0 | -894.9 | -3241.8 | -856.5  | -2578.1 |
| c2mpyr-bf4-p3 | -30.3 | -29.4 | -1765.6 | -5834.3  | -894.5 | -3241.7 | -856.5  | -2577.0 | -894.5 | -3241.6 | -856.5  | -2578.0 |
| c2mpyr-br-p1  | -58.9 | -47.3 | -1205.7 | -3953.3  | -895.1 | -3242.4 | -284.0  | -678.5  | -895.1 | -3242.5 | -287.7  | -686.4  |
| c2mpyr-br-p2  | -57.2 | -45.7 | -1204.8 | -3952.8  | -895.0 | -3242.9 | -284.0  | -678.5  | -895.0 | -3242.8 | -287.6  | -686.4  |
| c2mpyr-br-p3  | -55.9 | -45.2 | -1204.2 | -3951.8  | -895.0 | -3242.5 | -284.0  | -678.5  | -895.0 | -3242.6 | -287.4  | -685.9  |
| c2mpyr-cl-p1  | -41.9 | -40.4 | -1058.9 | -3749.9  | -895.2 | -3242.5 | -143.9  | -485.3  | -895.2 | -3242.5 | -143.8  | -486.9  |
| c2mpyr-cl-p2  | -40.9 | -39.4 | -1058.1 | -3749.5  | -894.9 | -3242.6 | -143.9  | -485.3  | -894.9 | -3242.6 | -143.8  | -486.9  |
| c2mpyr-cl-p3  | -40.6 | -39.1 | -1058.2 | -3749.4  | -895.2 | -3242.6 | -143.9  | -485.3  | -895.1 | -3242.7 | -143.8  | -486.8  |
| c2mpyr-dca-p1 | -43.2 | -42.6 | -1572.8 | -5198.3  | -894.9 | -3242.1 | -656.7  | -1934.3 | -894.9 | -3242.0 | -656.6  | -1935.1 |
| c2mpyr-dca-p2 | -46.7 | -46.1 | -1574.0 | -5200.4  | -894.6 | -3241.8 | -656.7  | -1934.6 | -894.5 | -3241.7 | -656.6  | -1935.5 |
| c2mpyr-dca-p3 | -47.5 | -46.8 | -1574.1 | -5201.0  | -894.7 | -3241.8 | -656.6  | -1934.5 | -894.6 | -3241.7 | -656.6  | -1935.4 |
| c2mpyr-mes-p1 | -40.6 | -39.6 | -1727.0 | -5734.0  | -894.5 | -3241.8 | -812.0  | -2472.1 | -894.4 | -3241.7 | -812.0  | -2473.3 |



|                |       |       |         |          |         |         |         |         |         |         |         |         |
|----------------|-------|-------|---------|----------|---------|---------|---------|---------|---------|---------|---------|---------|
| c2mpyr-mes-p2  | -37.5 | -36.4 | -1726.0 | -5733.1  | -895.1  | -3242.3 | -812.0  | -2472.1 | -895.1  | -3242.2 | -812.1  | -2473.5 |
| c2mpyr-mes-p3  | -36.3 | -35.1 | -1724.9 | -5732.1  | -894.6  | -3242.1 | -812.0  | -2472.0 | -894.6  | -3242.0 | -812.0  | -2473.3 |
| c2mpyr-ntf2-p1 | -48.1 | -46.9 | -3504.2 | -10817.1 | -894.8  | -3241.5 | -2586.6 | -7550.2 | -894.7  | -3241.4 | -2586.6 | -7551.7 |
| c2mpyr-ntf2-p2 | -38.8 | -37.3 | -3499.8 | -10810.6 | -894.4  | -3241.3 | -2586.5 | -7549.4 | -894.4  | -3241.3 | -2586.5 | -7551.0 |
| c2mpyr-ntf2-p3 | -47.2 | -45.8 | -3503.5 | -10816.5 | -894.6  | -3241.5 | -2586.6 | -7550.1 | -894.5  | -3241.4 | -2586.5 | -7551.6 |
| c2mpyr-ntf2-p4 | -46.1 | -44.8 | -3502.8 | -10816.1 | -894.6  | -3241.5 | -2586.6 | -7550.2 | -894.5  | -3241.4 | -2586.5 | -7551.6 |
| c2mpyr-ntf2-p5 | -40.4 | -39.0 | -3500.4 | -10811.2 | -894.3  | -3241.3 | -2586.4 | -7549.2 | -894.2  | -3241.2 | -2586.4 | -7550.8 |
| c2mpyr-ntf2-p6 | -38.3 | -36.7 | -3499.8 | -10810.5 | -894.7  | -3241.5 | -2586.5 | -7549.3 | -894.6  | -3241.5 | -2586.5 | -7550.9 |
| c2mpyr-pf6-p1  | -32.7 | -31.4 | -2221.8 | -7164.3  | -894.7  | -3241.6 | -1311.5 | -3905.7 | -894.6  | -3241.5 | -1311.5 | -3907.1 |
| c2mpyr-pf6-p2  | -31.0 | -29.7 | -2221.0 | -7163.6  | -894.7  | -3241.6 | -1311.5 | -3905.8 | -894.6  | -3241.5 | -1311.5 | -3907.2 |
| c2mpyr-pf6-p3  | -30.6 | -29.3 | -2220.5 | -7163.4  | -894.5  | -3241.5 | -1311.5 | -3905.8 | -894.5  | -3241.5 | -1311.5 | -3907.1 |
| c2mpyr-tos-p1  | -38.5 | -37.6 | -2408.4 | -7783.9  | -894.4  | -3241.7 | -1494.3 | -4523.4 | -894.4  | -3241.6 | -1494.2 | -4524.5 |
| c2mpyr-tos-p2  | -35.5 | -34.5 | -2407.4 | -7783.1  | -895.1  | -3242.2 | -1494.2 | -4523.4 | -895.0  | -3242.1 | -1494.2 | -4524.6 |
| c3mim-bf4-p1   | -35.5 | -34.6 | -1921.4 | -6121.9  | -1047.5 | -3525.2 | -856.9  | -2578.4 | -1047.4 | -3525.2 | -856.8  | -2579.2 |
| c3mim-bf4-p2   | -34.6 | -33.7 | -1920.9 | -6121.5  | -1047.5 | -3525.1 | -856.9  | -2578.4 | -1047.4 | -3525.2 | -856.8  | -2579.2 |
| c3mim-br-p1    | -60.6 | -49.0 | -1360.5 | -4243.5  | -1048.8 | -3532.1 | -284.0  | -678.5  | -1048.8 | -3532.2 | -287.7  | -686.4  |
| c3mim-br-p2    | -46.1 | -33.7 | -1354.8 | -4236.9  | -1049.5 | -3533.6 | -284.0  | -678.5  | -1049.5 | -3533.6 | -287.9  | -687.1  |
| c3mim-br-p3    | -50.8 | -38.3 | -1356.5 | -4238.8  | -1049.1 | -3533.0 | -284.0  | -678.5  | -1049.1 | -3533.0 | -287.9  | -687.1  |
| c3mim-br-p4    | -61.3 | -49.5 | -1361.2 | -4244.4  | -1049.1 | -3532.8 | -284.0  | -678.5  | -1049.1 | -3532.9 | -287.8  | -686.5  |
| c3mim-cl-p1    | -41.4 | -40.4 | -1212.6 | -4038.6  | -1048.7 | -3531.9 | -143.9  | -485.3  | -1048.7 | -3531.9 | -143.8  | -486.5  |
| c3mim-cl-p2    | -30.8 | -29.1 | -1209.2 | -4034.6  | -1049.8 | -3534.1 | -143.9  | -485.3  | -1049.7 | -3534.1 | -143.8  | -487.1  |
| c3mim-cl-p3    | -34.7 | -33.0 | -1210.6 | -4036.0  | -1049.3 | -3533.4 | -143.9  | -485.3  | -1049.3 | -3533.4 | -143.8  | -487.1  |
| c3mim-cl-p4    | -41.0 | -39.9 | -1212.7 | -4038.8  | -1048.9 | -3532.4 | -143.9  | -485.3  | -1048.9 | -3532.5 | -143.8  | -486.5  |
| c3mim-dca-p1   | -65.4 | -64.7 | -1740.5 | -5508.3  | -1047.3 | -3525.3 | -662.3  | -1948.4 | -1047.2 | -3525.2 | -662.3  | -1949.3 |
| c3mim-dca-p2   | -67.0 | -66.3 | -1741.5 | -5509.7  | -1047.7 | -3525.9 | -662.4  | -1948.2 | -1047.6 | -3525.8 | -662.3  | -1949.1 |
| c3mim-dca-p3   | -56.5 | -55.7 | -1736.8 | -5504.4  | -1047.8 | -3526.5 | -662.1  | -1948.2 | -1047.7 | -3526.4 | -662.1  | -1949.3 |
| c3mim-dca-p4   | -68.2 | -67.4 | -1742.2 | -5509.5  | -1047.5 | -3525.5 | -662.4  | -1948.1 | -1047.4 | -3525.5 | -662.3  | -1949.1 |
| c3mim-dca-p5   | -64.8 | -64.1 | -1739.5 | -5507.4  | -1046.9 | -3524.8 | -662.3  | -1948.1 | -1046.8 | -3524.7 | -662.2  | -1949.0 |
| c3mim-dca-p6   | -63.7 | -63.0 | -1739.2 | -5506.9  | -1047.0 | -3524.8 | -662.5  | -1948.2 | -1046.9 | -3524.7 | -662.4  | -1949.1 |
| c3mim-mes-p1   | -52.0 | -50.9 | -1886.3 | -6023.7  | -1048.3 | -3526.6 | -812.1  | -2471.0 | -1048.2 | -3526.6 | -812.0  | -2472.2 |
| c3mim-mes-p2   | -45.1 | -44.2 | -1881.5 | -6018.7  | -1047.1 | -3524.8 | -812.1  | -2471.1 | -1047.1 | -3524.9 | -812.1  | -2472.1 |
| c3mim-ntf2-p1  | -80.1 | -78.5 | -3673.4 | -11118.9 | -1047.5 | -3525.3 | -2588.2 | -7551.3 | -1047.3 | -3525.3 | -2588.2 | -7553.1 |
| c3mim-ntf2-p2  | -52.2 | -50.6 | -3660.8 | -11103.7 | -1047.7 | -3526.5 | -2587.7 | -7550.4 | -1047.6 | -3526.4 | -2587.6 | -7552.2 |
| c3mim-ntf2-p3  | -47.3 | -45.7 | -3659.2 | -11099.4 | -1047.2 | -3525.5 | -2588.2 | -7550.4 | -1047.1 | -3525.5 | -2588.2 | -7552.1 |
| c3mim-ntf2-p4  | -68.8 | -67.4 | -3667.8 | -11112.5 | -1047.0 | -3524.5 | -2588.5 | -7551.6 | -1046.9 | -3524.5 | -2588.4 | -7553.1 |
| c3mim-pf6-p1   | -40.1 | -38.9 | -2377.3 | -7451.1  | -1047.2 | -3524.7 | -1311.3 | -3905.1 | -1047.1 | -3524.7 | -1311.3 | -3906.4 |
| c3mim-pf6-p2   | -35.7 | -34.6 | -2374.8 | -7448.4  | -1046.7 | -3524.1 | -1311.3 | -3905.3 | -1046.6 | -3524.2 | -1311.4 | -3906.5 |
| c3mim-tos-p1   | -51.8 | -51.1 | -2568.8 | -8074.8  | -1048.1 | -3526.3 | -1494.7 | -4522.7 | -1048.0 | -3526.2 | -1494.6 | -4523.6 |
| c3mim-tos-p2   | -49.0 | -48.2 | -2567.0 | -8073.1  | -1047.8 | -3525.8 | -1494.7 | -4522.7 | -1047.7 | -3525.8 | -1494.7 | -4523.7 |



|                |       |       |         |          |         |         |         |         |         |         |         |         |
|----------------|-------|-------|---------|----------|---------|---------|---------|---------|---------|---------|---------|---------|
| c3mpyr-bf4-p1  | -32.8 | -31.9 | -1876.1 | -6232.8  | -1003.7 | -3639.0 | -856.5  | -2576.9 | -1003.6 | -3638.9 | -856.5  | -2578.0 |
| c3mpyr-bf4-p2  | -30.7 | -29.8 | -1875.4 | -6232.1  | -1004.0 | -3639.2 | -856.5  | -2577.0 | -1003.9 | -3639.1 | -856.5  | -2578.1 |
| c3mpyr-bf4-p3  | -30.5 | -29.6 | -1874.9 | -6231.9  | -1003.7 | -3639.1 | -856.5  | -2577.0 | -1003.6 | -3639.0 | -856.5  | -2578.0 |
| c3mpyr-br-p1   | -60.4 | -48.1 | -1315.5 | -4351.6  | -1004.3 | -3639.9 | -284.0  | -678.5  | -1004.3 | -3639.9 | -287.9  | -686.9  |
| c3mpyr-br-p2   | -57.2 | -45.4 | -1313.8 | -4349.9  | -1004.2 | -3639.8 | -284.0  | -678.5  | -1004.1 | -3639.8 | -287.7  | -686.7  |
| c3mpyr-br-p3   | -57.1 | -45.9 | -1313.9 | -4349.9  | -1004.2 | -3640.0 | -284.0  | -678.5  | -1004.2 | -3640.0 | -287.6  | -686.2  |
| c3mpyr-cl-p1   | -42.3 | -40.8 | -1168.3 | -4147.6  | -1004.4 | -3640.0 | -143.9  | -485.3  | -1004.3 | -3640.0 | -143.8  | -486.9  |
| c3mpyr-cl-p2   | -41.1 | -39.6 | -1167.4 | -4146.9  | -1004.1 | -3639.9 | -143.9  | -485.3  | -1004.1 | -3639.9 | -143.8  | -486.9  |
| c3mpyr-cl-p3   | -40.9 | -39.4 | -1167.5 | -4147.0  | -1004.3 | -3640.1 | -143.9  | -485.3  | -1004.3 | -3640.1 | -143.8  | -486.8  |
| c3mpyr-dca-p1  | -44.4 | -43.8 | -1682.4 | -5596.4  | -1003.9 | -3639.3 | -656.7  | -1934.5 | -1003.8 | -3639.2 | -656.7  | -1935.3 |
| c3mpyr-dca-p2  | -46.6 | -46.0 | -1683.1 | -5597.8  | -1003.8 | -3639.2 | -656.7  | -1934.6 | -1003.7 | -3639.1 | -656.6  | -1935.4 |
| c3mpyr-dca-p3  | -42.1 | -41.5 | -1679.7 | -5597.3  | -1003.9 | -3639.2 | -656.6  | -1935.2 | -1003.8 | -3639.1 | -656.6  | -1936.0 |
| c3mpyr-dca-p4  | -45.5 | -44.7 | -1682.4 | -5597.5  | -1004.0 | -3639.4 | -656.6  | -1934.5 | -1004.0 | -3639.4 | -656.5  | -1935.4 |
| c3mpyr-dca-p5  | -47.4 | -46.8 | -1683.2 | -5598.4  | -1003.8 | -3639.2 | -656.6  | -1934.5 | -1003.8 | -3639.1 | -656.6  | -1935.4 |
| c3mpyr-mes-p1  | -41.3 | -40.2 | -1836.5 | -6131.8  | -1003.7 | -3639.2 | -812.0  | -2472.1 | -1003.6 | -3639.1 | -812.0  | -2473.3 |
| c3mpyr-mes-p2  | -37.7 | -36.5 | -1835.2 | -6130.6  | -1004.3 | -3639.6 | -812.0  | -2472.1 | -1004.2 | -3639.6 | -812.1  | -2473.5 |
| c3mpyr-mes-p3  | -37.1 | -35.9 | -1834.5 | -6130.0  | -1003.8 | -3639.5 | -812.0  | -2472.1 | -1003.7 | -3639.4 | -812.0  | -2473.4 |
| c3mpyr-ntf2-p1 | -50.1 | -48.9 | -3614.3 | -11215.7 | -1004.0 | -3639.2 | -2586.6 | -7550.2 | -1003.9 | -3639.0 | -2586.6 | -7551.7 |
| c3mpyr-ntf2-p2 | -38.5 | -37.1 | -3609.1 | -11207.7 | -1003.7 | -3638.8 | -2586.5 | -7549.3 | -1003.6 | -3638.8 | -2586.5 | -7550.9 |
| c3mpyr-ntf2-p3 | -47.4 | -46.0 | -3612.7 | -11214.0 | -1003.7 | -3638.9 | -2586.6 | -7550.2 | -1003.6 | -3638.8 | -2586.6 | -7551.7 |
| c3mpyr-ntf2-p4 | -48.2 | -46.8 | -3613.0 | -11214.5 | -1003.8 | -3639.0 | -2586.5 | -7550.0 | -1003.7 | -3639.0 | -2586.5 | -7551.6 |
| c3mpyr-ntf2-p5 | -40.3 | -38.8 | -3609.4 | -11208.5 | -1003.4 | -3638.6 | -2586.3 | -7549.2 | -1003.4 | -3638.6 | -2586.3 | -7550.8 |
| c3mpyr-ntf2-p6 | -39.8 | -38.2 | -3609.7 | -11208.8 | -1003.8 | -3639.0 | -2586.5 | -7549.3 | -1003.8 | -3639.0 | -2586.5 | -7551.0 |
| c3mpyr-pf6-p1  | -33.8 | -32.4 | -2331.1 | -7562.2  | -1003.6 | -3638.8 | -1311.5 | -3905.7 | -1003.5 | -3638.7 | -1311.5 | -3907.2 |
| c3mpyr-pf6-p2  | -30.9 | -29.6 | -2330.0 | -7560.9  | -1003.8 | -3639.0 | -1311.5 | -3905.7 | -1003.8 | -3638.9 | -1311.5 | -3907.2 |
| c3mpyr-pf6-p3  | -31.1 | -29.7 | -2329.8 | -7561.1  | -1003.7 | -3638.9 | -1311.5 | -3905.8 | -1003.6 | -3638.9 | -1311.5 | -3907.2 |
| c3mpyr-tos-p1  | -39.3 | -38.4 | -2517.9 | -8181.8  | -1003.6 | -3639.2 | -1494.2 | -4523.4 | -1003.5 | -3639.1 | -1494.2 | -4524.5 |
| c3mpyr-tos-p2  | -35.7 | -34.7 | -2516.6 | -8180.5  | -1004.3 | -3639.6 | -1494.2 | -4523.4 | -1004.2 | -3639.5 | -1494.2 | -4524.6 |
| c4mim-bf4-p1   | -36.0 | -35.1 | -2030.8 | -6519.1  | -1156.6 | -3922.1 | -856.8  | -2578.4 | -1156.6 | -3922.2 | -856.8  | -2579.3 |
| c4mim-bf4-p2   | -34.7 | -33.9 | -2030.1 | -6518.3  | -1156.6 | -3921.9 | -856.9  | -2578.4 | -1156.5 | -3922.0 | -856.8  | -2579.2 |
| c4mim-br-p1    | -61.9 | -49.8 | -1470.2 | -4641.7  | -1158.0 | -3929.5 | -284.0  | -678.5  | -1157.9 | -3929.6 | -287.9  | -686.7  |
| c4mim-br-p2    | -47.6 | -34.7 | -1464.6 | -4635.2  | -1158.7 | -3931.0 | -284.0  | -678.5  | -1158.7 | -3931.0 | -288.0  | -687.4  |
| c4mim-br-p3    | -53.4 | -40.1 | -1466.9 | -4637.7  | -1158.3 | -3930.4 | -284.0  | -678.5  | -1158.3 | -3930.4 | -288.2  | -687.7  |
| c4mim-br-p4    | -62.2 | -50.0 | -1470.7 | -4642.2  | -1158.2 | -3930.0 | -284.0  | -678.5  | -1158.2 | -3930.1 | -287.9  | -686.8  |
| c4mim-cl-p1    | -42.0 | -40.9 | -1322.0 | -4436.3  | -1157.8 | -3929.3 | -143.9  | -485.3  | -1157.8 | -3929.3 | -143.8  | -486.5  |
| c4mim-cl-p2    | -31.3 | -29.6 | -1318.7 | -4432.3  | -1158.9 | -3931.5 | -143.9  | -485.3  | -1158.9 | -3931.5 | -143.8  | -487.1  |
| c4mim-cl-p3    | -35.9 | -34.3 | -1320.3 | -4434.0  | -1158.5 | -3930.8 | -143.9  | -485.3  | -1158.4 | -3930.7 | -143.8  | -487.1  |
| c4mim-cl-p4    | -41.4 | -40.2 | -1321.9 | -4436.3  | -1158.0 | -3929.7 | -143.9  | -485.3  | -1157.9 | -3929.7 | -143.8  | -486.5  |
| c4mim-dca-p1   | -66.1 | -65.4 | -1850.0 | -5905.6  | -1156.5 | -3922.3 | -662.3  | -1948.4 | -1156.4 | -3922.2 | -662.3  | -1949.3 |



|                |       |       |         |          |         |         |         |         |         |         |         |         |
|----------------|-------|-------|---------|----------|---------|---------|---------|---------|---------|---------|---------|---------|
| c4mim-dca-p2   | -69.7 | -68.9 | -1852.2 | -5907.3  | -1156.7 | -3922.5 | -662.4  | -1948.1 | -1156.6 | -3922.5 | -662.3  | -1949.1 |
| c4mim-dca-p3   | -65.0 | -64.3 | -1848.7 | -5904.4  | -1156.0 | -3921.6 | -662.3  | -1948.1 | -1155.9 | -3921.6 | -662.2  | -1949.0 |
| c4mim-mes-p1   | -53.1 | -52.0 | -1996.0 | -6421.2  | -1157.5 | -3923.5 | -812.1  | -2471.0 | -1157.4 | -3923.5 | -812.0  | -2472.2 |
| c4mim-mes-p2   | -45.2 | -44.2 | -1990.6 | -6415.5  | -1156.2 | -3921.6 | -812.1  | -2471.1 | -1156.1 | -3921.6 | -812.1  | -2472.1 |
| c4mim-pf6-p1   | -42.1 | -40.6 | -2487.9 | -7849.6  | -1156.6 | -3922.1 | -1311.3 | -3905.3 | -1156.5 | -3922.2 | -1311.4 | -3906.9 |
| c4mim-pf6-p2   | -35.7 | -34.6 | -2483.9 | -7845.2  | -1155.8 | -3920.9 | -1311.3 | -3905.3 | -1155.7 | -3921.0 | -1311.4 | -3906.5 |
| c4mim-tos-p1   | -54.0 | -53.2 | -2679.0 | -8473.0  | -1157.4 | -3923.3 | -1494.7 | -4522.7 | -1157.2 | -3923.3 | -1494.6 | -4523.7 |
| c4mim-tos-p2   | -50.1 | -49.2 | -2677.1 | -8470.8  | -1157.3 | -3923.1 | -1494.7 | -4522.7 | -1157.2 | -3923.2 | -1494.7 | -4523.7 |
| c4mpyr-bf4-p1  | -32.9 | -32.0 | -1985.1 | -6629.9  | -1112.7 | -4036.0 | -856.5  | -2577.0 | -1112.6 | -4035.9 | -856.5  | -2578.0 |
| c4mpyr-bf4-p2  | -30.9 | -29.9 | -1984.4 | -6629.2  | -1113.0 | -4036.2 | -856.5  | -2577.0 | -1112.9 | -4036.2 | -856.5  | -2578.1 |
| c4mpyr-bf4-p3  | -30.7 | -29.8 | -1984.0 | -6629.1  | -1112.8 | -4036.1 | -856.5  | -2577.0 | -1112.7 | -4036.1 | -856.5  | -2578.0 |
| c4mpyr-br-p1   | -60.9 | -48.3 | -1424.8 | -4748.9  | -1113.4 | -4036.9 | -284.0  | -678.5  | -1113.4 | -4037.0 | -288.0  | -687.1  |
| c4mpyr-br-p2   | -58.0 | -45.6 | -1423.1 | -4747.5  | -1113.2 | -4036.9 | -284.0  | -678.5  | -1113.2 | -4036.9 | -287.9  | -687.0  |
| c4mpyr-br-p3   | -57.7 | -46.1 | -1423.2 | -4747.3  | -1113.3 | -4037.0 | -284.0  | -678.5  | -1113.3 | -4037.1 | -287.7  | -686.4  |
| c4mpyr-cl-p1   | -42.3 | -40.8 | -1277.3 | -4544.6  | -1113.4 | -4037.0 | -143.9  | -485.3  | -1113.4 | -4037.0 | -143.8  | -486.9  |
| c4mpyr-cl-p2   | -41.6 | -40.0 | -1276.7 | -4544.4  | -1113.1 | -4037.1 | -143.9  | -485.3  | -1113.1 | -4037.1 | -143.8  | -486.9  |
| c4mpyr-cl-p3   | -40.8 | -39.4 | -1276.4 | -4544.0  | -1113.3 | -4037.1 | -143.9  | -485.3  | -1113.3 | -4037.1 | -143.8  | -486.8  |
| c4mpyr-dca-p1  | -44.3 | -43.7 | -1790.4 | -5994.0  | -1112.9 | -4036.0 | -656.6  | -1934.7 | -1112.8 | -4035.9 | -656.6  | -1935.5 |
| c4mpyr-dca-p2  | -46.6 | -46.0 | -1792.1 | -5994.9  | -1112.8 | -4036.3 | -656.7  | -1934.6 | -1112.8 | -4036.2 | -656.6  | -1935.4 |
| c4mpyr-dca-p3  | -45.0 | -44.5 | -1791.6 | -5993.7  | -1112.9 | -4036.3 | -656.7  | -1934.5 | -1112.8 | -4036.1 | -656.6  | -1935.3 |
| c4mpyr-dca-p4  | -45.9 | -45.4 | -1791.4 | -5994.8  | -1112.8 | -4036.3 | -656.6  | -1934.6 | -1112.7 | -4036.1 | -656.6  | -1935.4 |
| c4mpyr-dca-p5  | -47.5 | -46.9 | -1792.3 | -5995.5  | -1112.8 | -4036.2 | -656.6  | -1934.6 | -1112.8 | -4036.1 | -656.6  | -1935.4 |
| c4mpyr-mes-p1  | -41.3 | -40.2 | -1945.5 | -6528.8  | -1112.7 | -4036.2 | -812.0  | -2472.1 | -1112.6 | -4036.1 | -812.0  | -2473.3 |
| c4mpyr-mes-p2  | -38.2 | -36.9 | -1944.4 | -6528.0  | -1113.3 | -4036.7 | -812.0  | -2472.1 | -1113.3 | -4036.7 | -812.1  | -2473.5 |
| c4mpyr-mes-p3  | -37.3 | -36.1 | -1943.6 | -6527.2  | -1112.9 | -4036.6 | -812.0  | -2472.1 | -1112.8 | -4036.5 | -812.0  | -2473.4 |
| c4mpyr-ntf2-p1 | -50.1 | -48.9 | -3723.3 | -11612.7 | -1113.0 | -4036.1 | -2586.6 | -7550.1 | -1112.9 | -4036.0 | -2586.5 | -7551.7 |
| c4mpyr-ntf2-p2 | -43.0 | -41.6 | -3720.1 | -11606.7 | -1112.7 | -4035.8 | -2586.3 | -7549.0 | -1112.6 | -4035.7 | -2586.3 | -7550.6 |
| c4mpyr-ntf2-p3 | -48.5 | -47.2 | -3722.3 | -11611.7 | -1112.7 | -4036.0 | -2586.6 | -7550.2 | -1112.6 | -4035.9 | -2586.5 | -7551.7 |
| c4mpyr-ntf2-p4 | -49.2 | -47.8 | -3722.6 | -11612.1 | -1112.8 | -4036.1 | -2586.6 | -7550.1 | -1112.7 | -4036.0 | -2586.5 | -7551.7 |
| c4mpyr-ntf2-p5 | -41.0 | -39.4 | -3718.7 | -11605.9 | -1112.4 | -4035.7 | -2586.3 | -7549.2 | -1112.4 | -4035.7 | -2586.3 | -7550.8 |
| c4mpyr-ntf2-p6 | -41.3 | -39.6 | -3719.4 | -11606.5 | -1112.9 | -4036.1 | -2586.4 | -7549.2 | -1112.8 | -4036.1 | -2586.4 | -7551.0 |
| c4mpyr-pf6-p1  | -33.9 | -32.5 | -2440.2 | -7959.3  | -1112.6 | -4035.9 | -1311.5 | -3905.7 | -1112.5 | -4035.8 | -1311.5 | -3907.2 |
| c4mpyr-pf6-p2  | -31.4 | -30.0 | -2439.2 | -7958.3  | -1112.9 | -4036.1 | -1311.5 | -3905.7 | -1112.8 | -4036.0 | -1311.5 | -3907.2 |
| c4mpyr-pf6-p3  | -31.3 | -29.9 | -2439.0 | -7958.3  | -1112.7 | -4036.0 | -1311.5 | -3905.8 | -1112.6 | -4036.0 | -1311.5 | -3907.2 |
| c4mpyr-tos-p1  | -39.5 | -38.6 | -2627.1 | -8579.0  | -1112.7 | -4036.3 | -1494.2 | -4523.4 | -1112.6 | -4036.2 | -1494.2 | -4524.5 |
| c4mpyr-tos-p2  | -36.3 | -35.3 | -2626.0 | -8578.0  | -1113.3 | -4036.7 | -1494.3 | -4523.4 | -1113.2 | -4036.7 | -1494.2 | -4524.6 |



### 2.3.5 augmented Q→5

Table S 24: Raw CBS (augmented Q→5) energies. Superscript \* indicates monomer calculated in the dimer basis set.

| ion pair      | E(int) | E(int) CP | E(dimer) SS | E(dimer) OS | E(A) SS | E(A) OS | E(B) SS | E(B) OS | E(A) SS* | E(A) OS* | E(B) SS* | E(B) OS* |
|---------------|--------|-----------|-------------|-------------|---------|---------|---------|---------|----------|----------|----------|----------|
| clmim-bf4-p1  | -32.3  | -32.1     | -1693.2     | -5368.1     | -823.6  | -2742.3 | -854.0  | -2609.2 | -823.5   | -2742.2  | -854.0   | -2609.5  |
| clmim-cl-p1   | -39.7  | -38.4     | -988.9      | -3263.1     | -825.3  | -2749.2 | -144.4  | -493.3  | -825.3   | -2749.1  | -144.4   | -494.7   |
| clmim-cl-p2   | -28.2  | -26.7     | -984.3      | -3256.9     | -825.4  | -2749.8 | -144.4  | -493.3  | -825.4   | -2749.8  | -144.4   | -494.7   |
| clmim-dca-p1  | -62.4  | -62.7     | -1513.8     | -4738.0     | -824.0  | -2743.4 | -659.9  | -1962.1 | -824.0   | -2743.3  | -659.8   | -1962.0  |
| clmim-dca-p2  | -45.7  | -45.7     | -1505.9     | -4729.9     | -824.1  | -2744.4 | -659.5  | -1962.1 | -824.1   | -2744.4  | -659.5   | -1962.1  |
| clmim-mes-p1  | -43.3  | -43.4     | -1658.2     | -5265.0     | -824.1  | -2743.2 | -812.2  | -2500.5 | -824.0   | -2743.0  | -812.1   | -2500.6  |
| clmim-ntf2-p1 | -69.1  | -69.4     | -3441.4     | -10424.2    | -823.6  | -2742.3 | -2584.6 | -7645.9 | -823.5   | -2742.1  | -2584.5  | -7646.0  |
| clmim-ntf2-p2 | -36.3  | -36.3     | -3426.2     | -10405.9    | -823.8  | -2743.9 | -2583.8 | -7644.2 | -823.8   | -2743.9  | -2583.7  | -7644.4  |
| clmim-ntf2-p3 | -41.1  | -41.0     | -3429.5     | -10408.0    | -823.6  | -2743.0 | -2584.7 | -7645.1 | -823.6   | -2742.9  | -2584.6  | -7645.4  |
| clmim-pf6-p1  | -34.8  | -34.6     | -2149.2     | -6718.7     | -823.6  | -2742.4 | -1308.9 | -3958.4 | -823.5   | -2742.3  | -1308.9  | -3958.7  |
| clmim-tos-p1  | -41.1  | -41.3     | -2336.6     | -7323.0     | -823.8  | -2742.9 | -1491.9 | -4559.9 | -823.7   | -2742.7  | -1491.8  | -4560.1  |
| clmpyr-bf4-p1 | -31.3  | -31.2     | -1647.8     | -5475.2     | -778.6  | -2851.6 | -853.6  | -2607.7 | -778.6   | -2851.5  | -853.6   | -2608.0  |
| clmpyr-bf4-p2 | -28.9  | -28.8     | -1646.6     | -5474.3     | -778.8  | -2851.8 | -853.6  | -2607.8 | -778.7   | -2851.7  | -853.6   | -2608.1  |
| clmpyr-cl-p1  | -41.5  | -40.1     | -943.5      | -3367.9     | -779.4  | -2852.7 | -144.4  | -493.3  | -779.4   | -2852.7  | -144.4   | -494.8   |
| clmpyr-cl-p2  | -40.5  | -39.0     | -942.9      | -3367.5     | -779.4  | -2852.8 | -144.4  | -493.3  | -779.3   | -2852.8  | -144.4   | -494.8   |
| clmpyr-dca-p1 | -42.4  | -42.6     | -1454.4     | -4821.8     | -779.2  | -2852.3 | -654.1  | -1948.3 | -779.2   | -2852.2  | -654.0   | -1948.3  |
| clmpyr-dca-p2 | -46.4  | -46.6     | -1455.6     | -4824.4     | -779.0  | -2852.0 | -654.0  | -1948.6 | -779.0   | -2852.0  | -653.9   | -1948.6  |
| clmpyr-dca-p3 | -42.3  | -42.7     | -1452.4     | -4823.4     | -778.7  | -2851.8 | -653.9  | -1949.0 | -778.7   | -2851.7  | -653.8   | -1948.8  |
| clmpyr-dca-p4 | -44.8  | -45.0     | -1454.6     | -4823.4     | -778.7  | -2851.8 | -654.0  | -1948.7 | -778.7   | -2851.7  | -654.0   | -1948.6  |



### 3.1.1 KSV(P) basis set

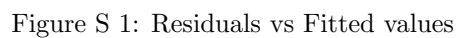



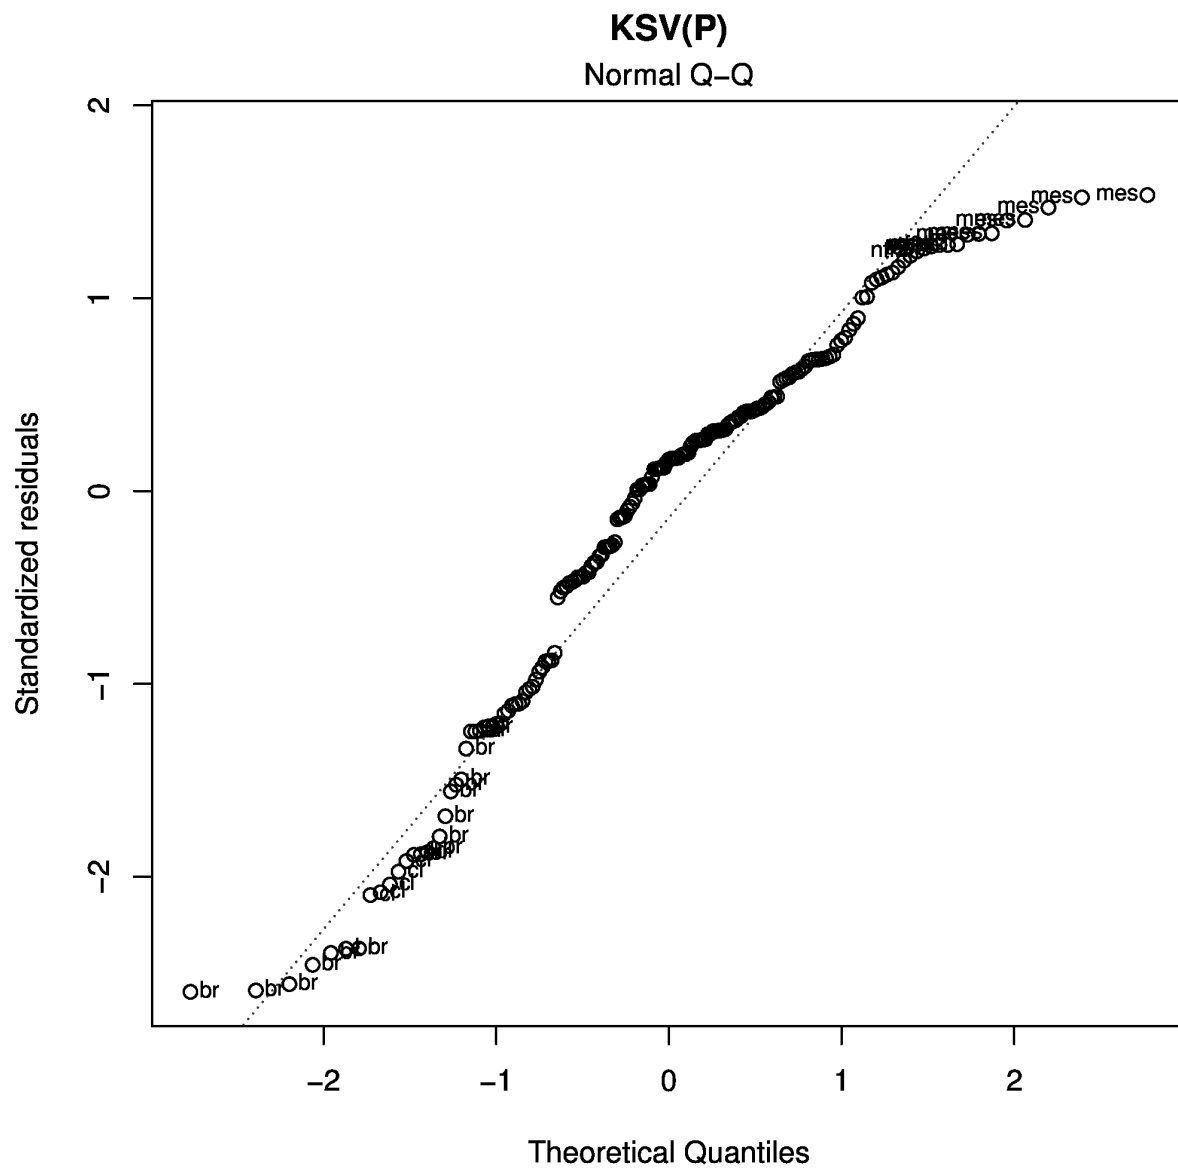

Figure S 2: Q-Q plot



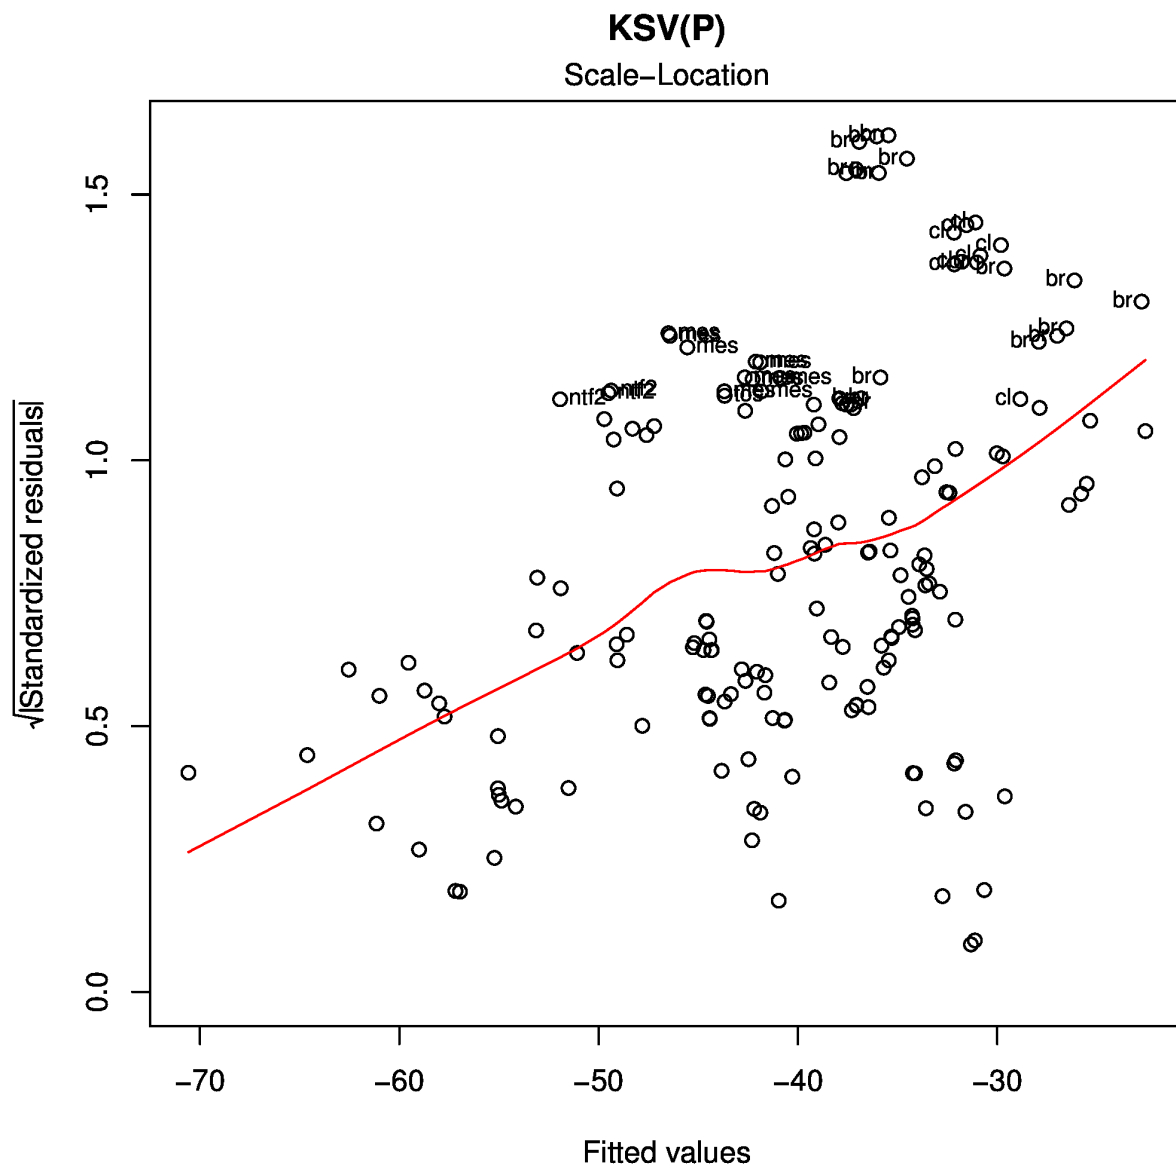

Figure S 3: Scale-Location plot







### 3.1.2 KSVP basis set

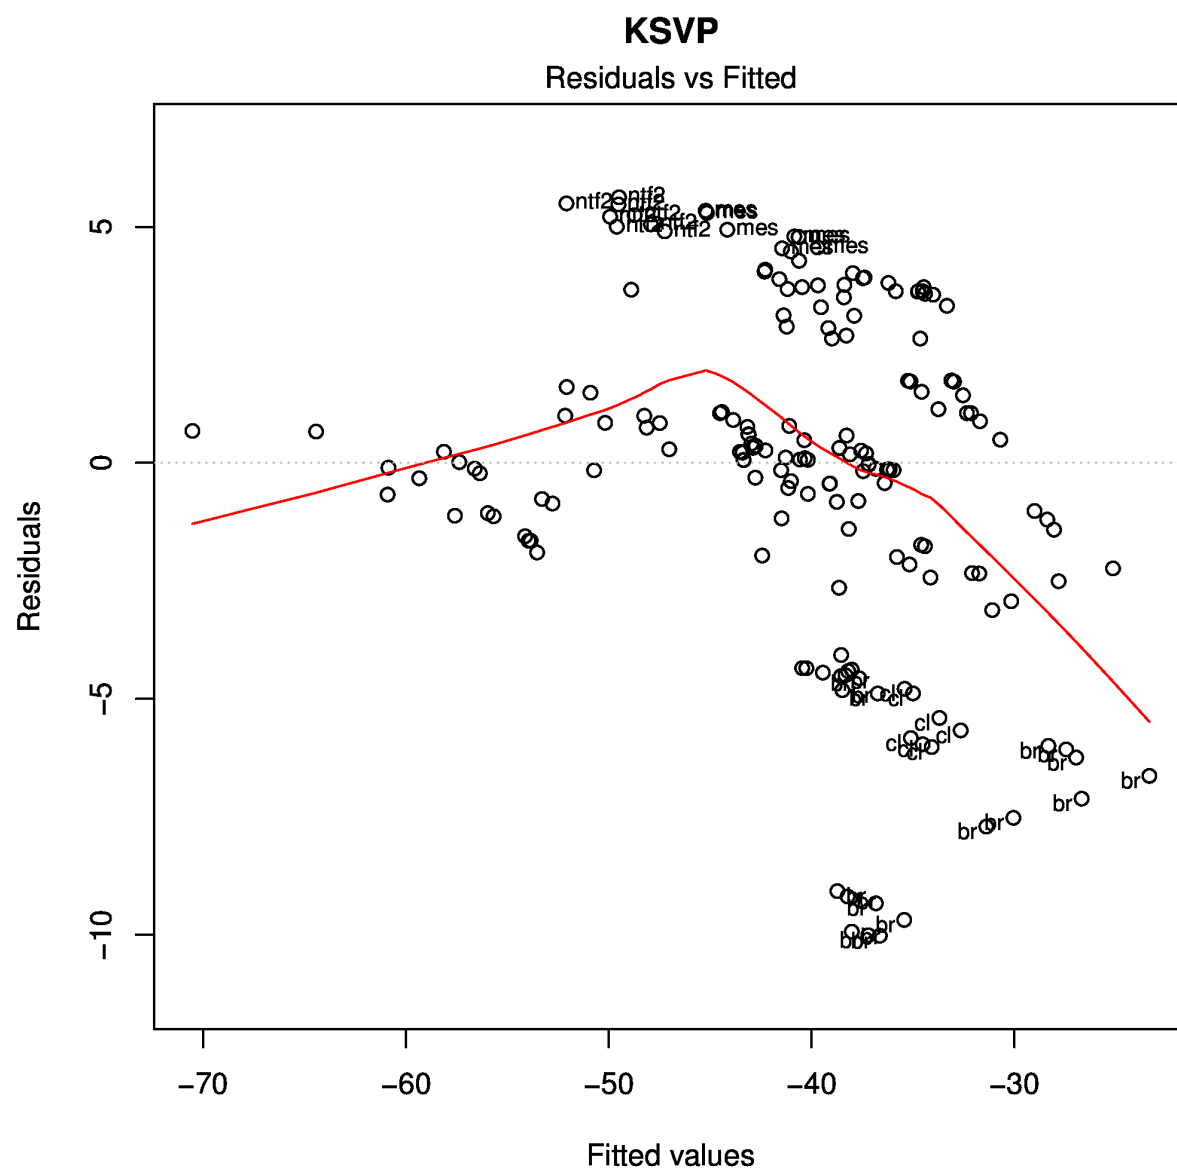

Figure S 5: Residuals vs Fitted values



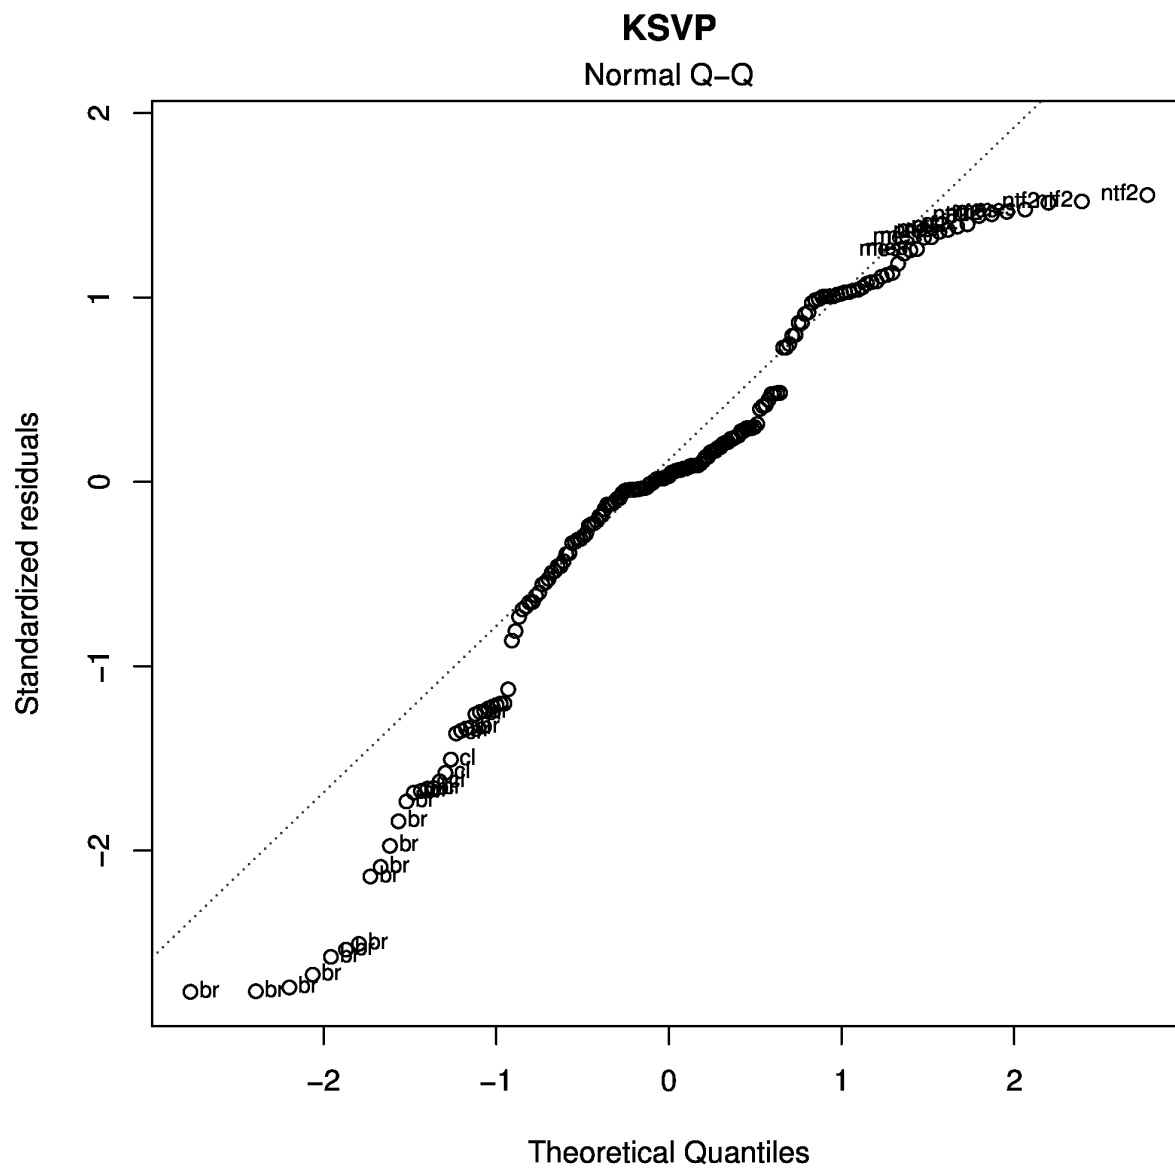

Figure S 6: Q-Q plot



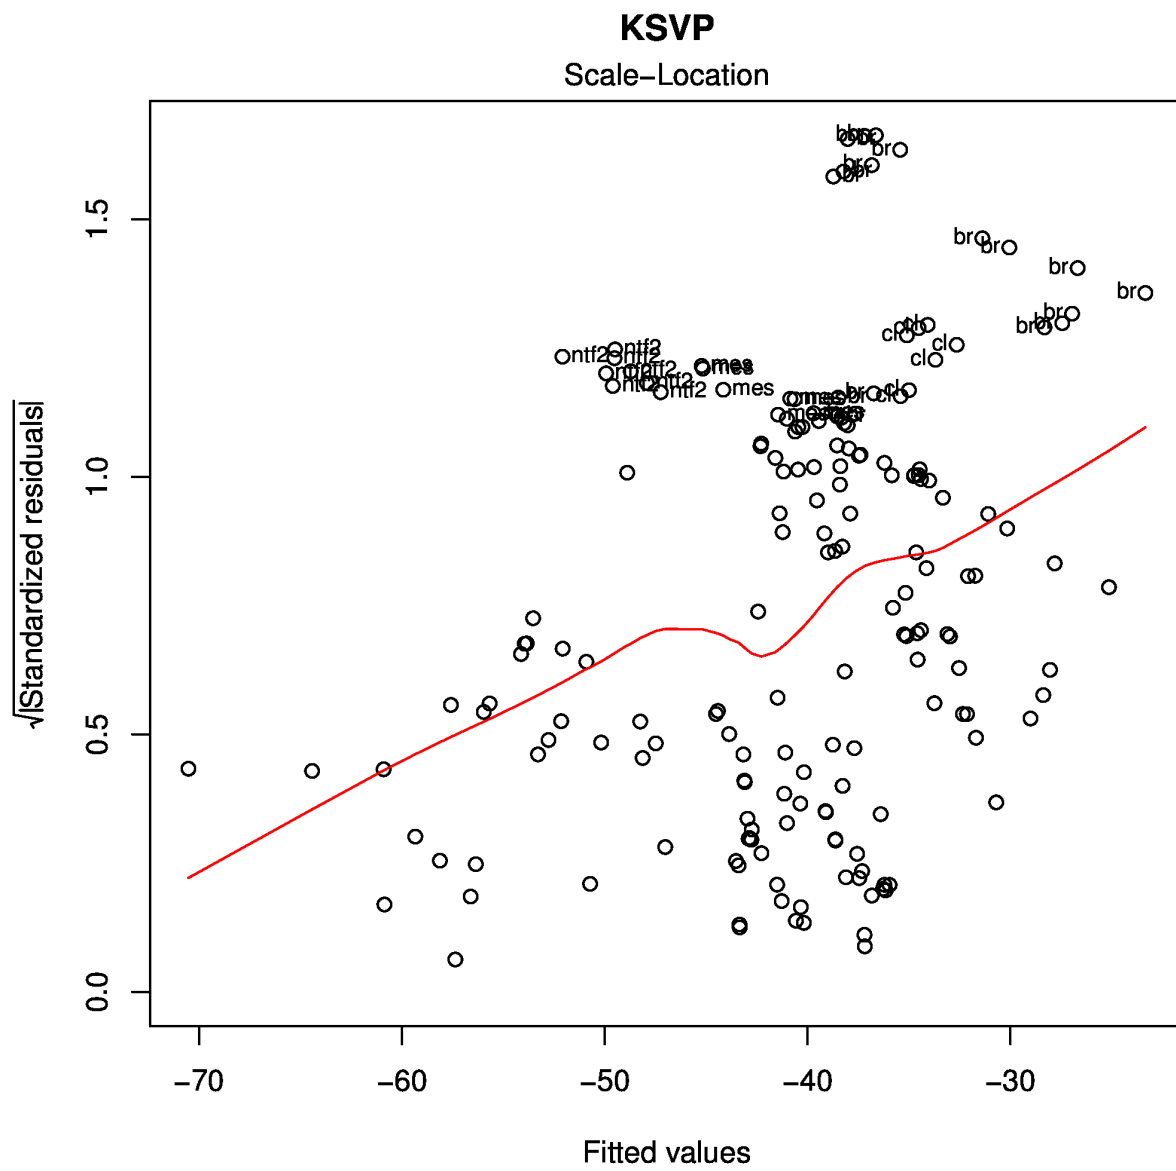

Figure S 7: Scale-Location plot



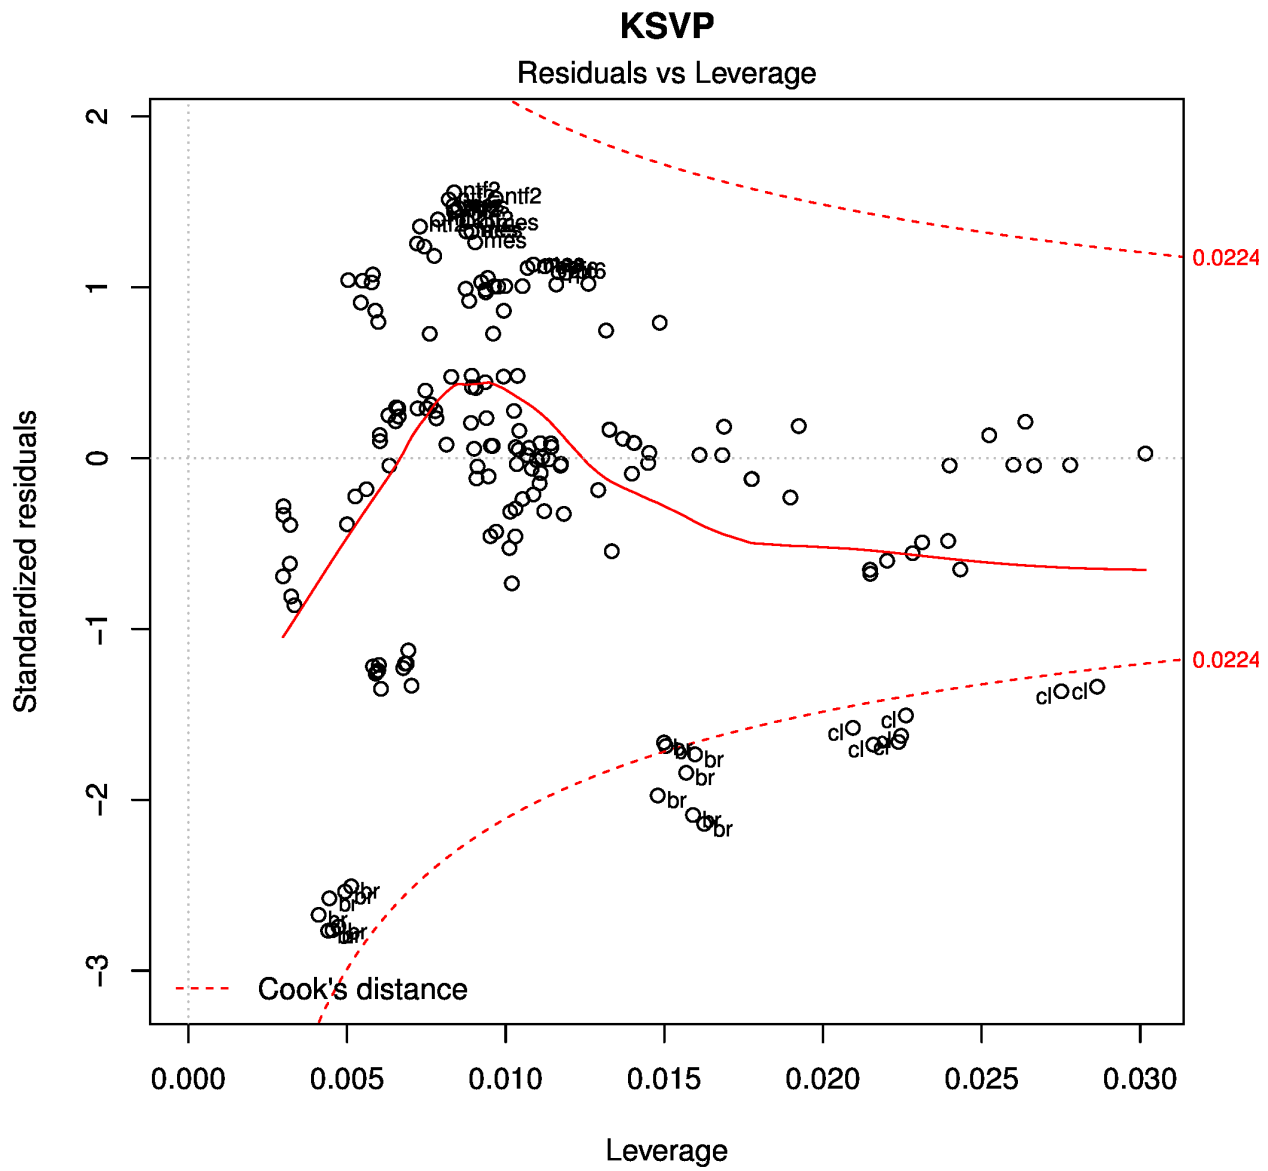

Figure S 8: Residuals vs Leverage plot



3.1.3 KTZVP basis set

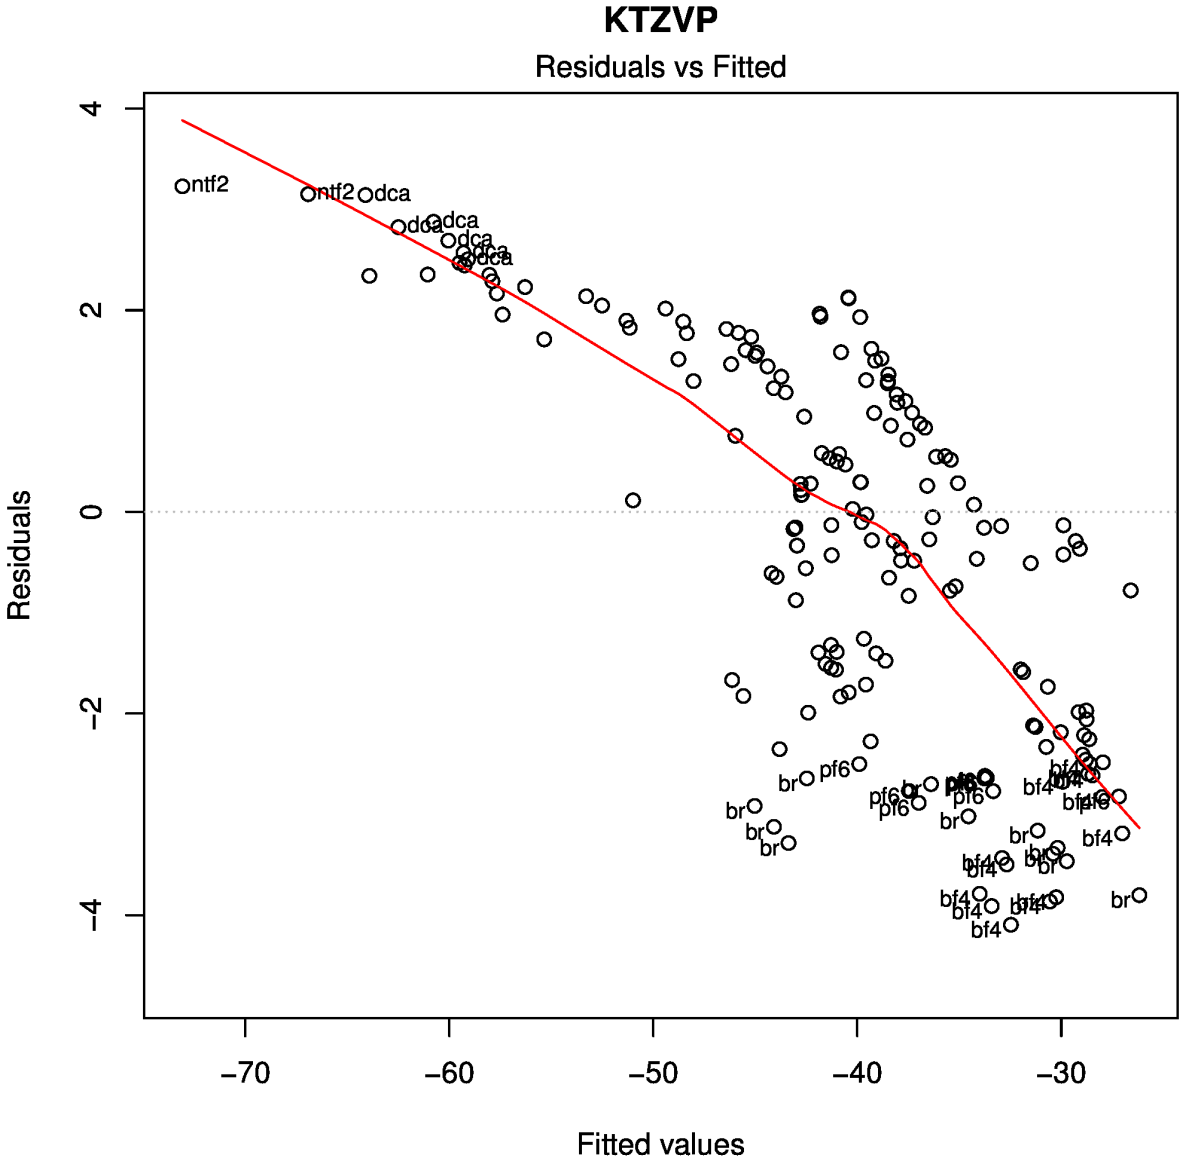

Figure S 9: Residuals vs Fitted values



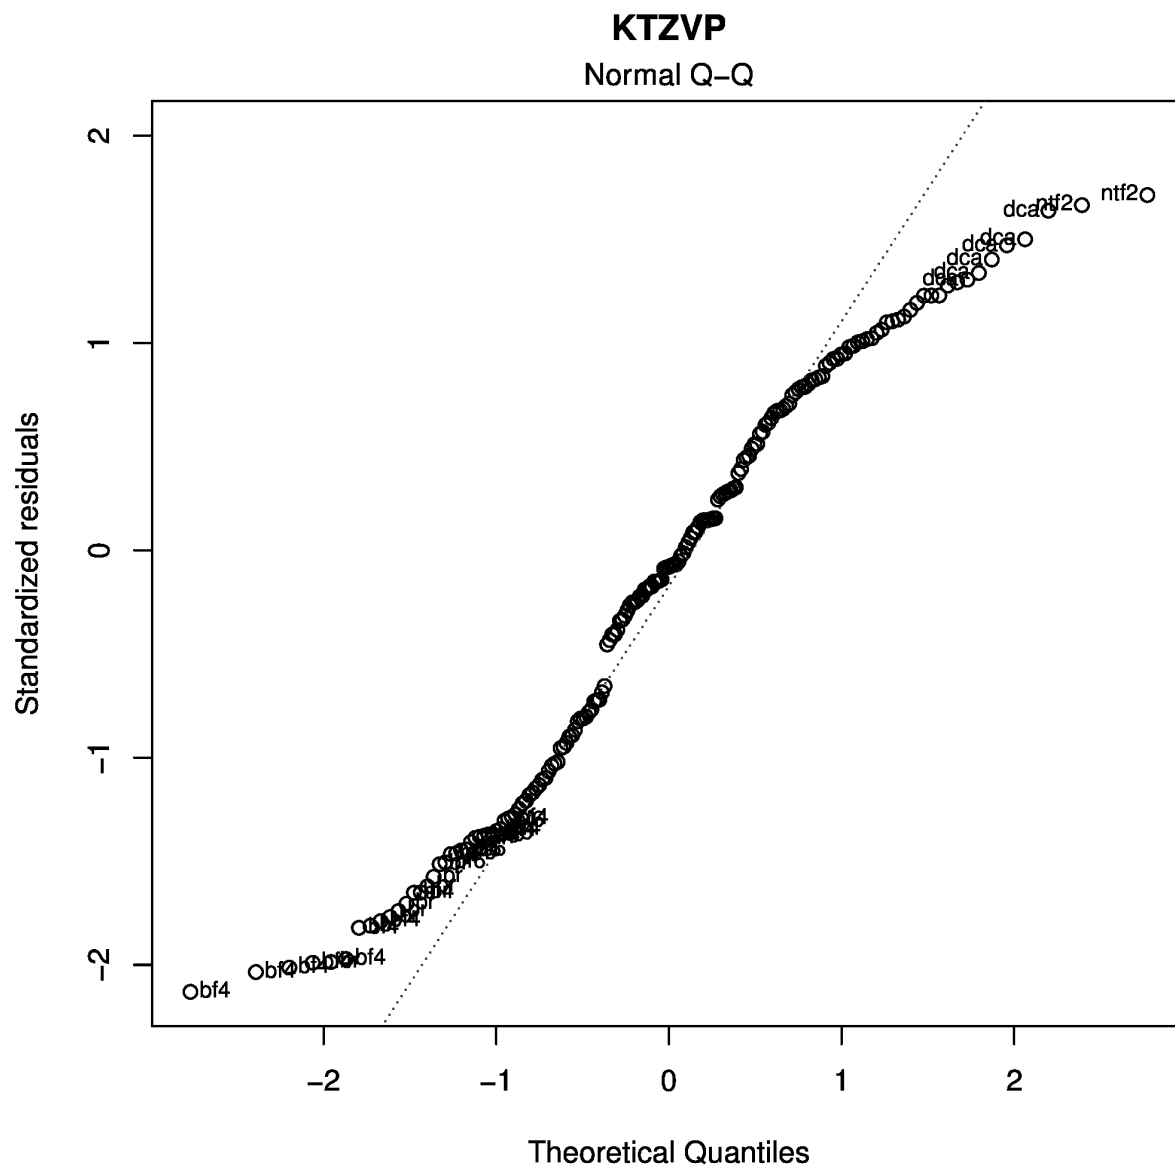

Figure S 10: Q-Q plot



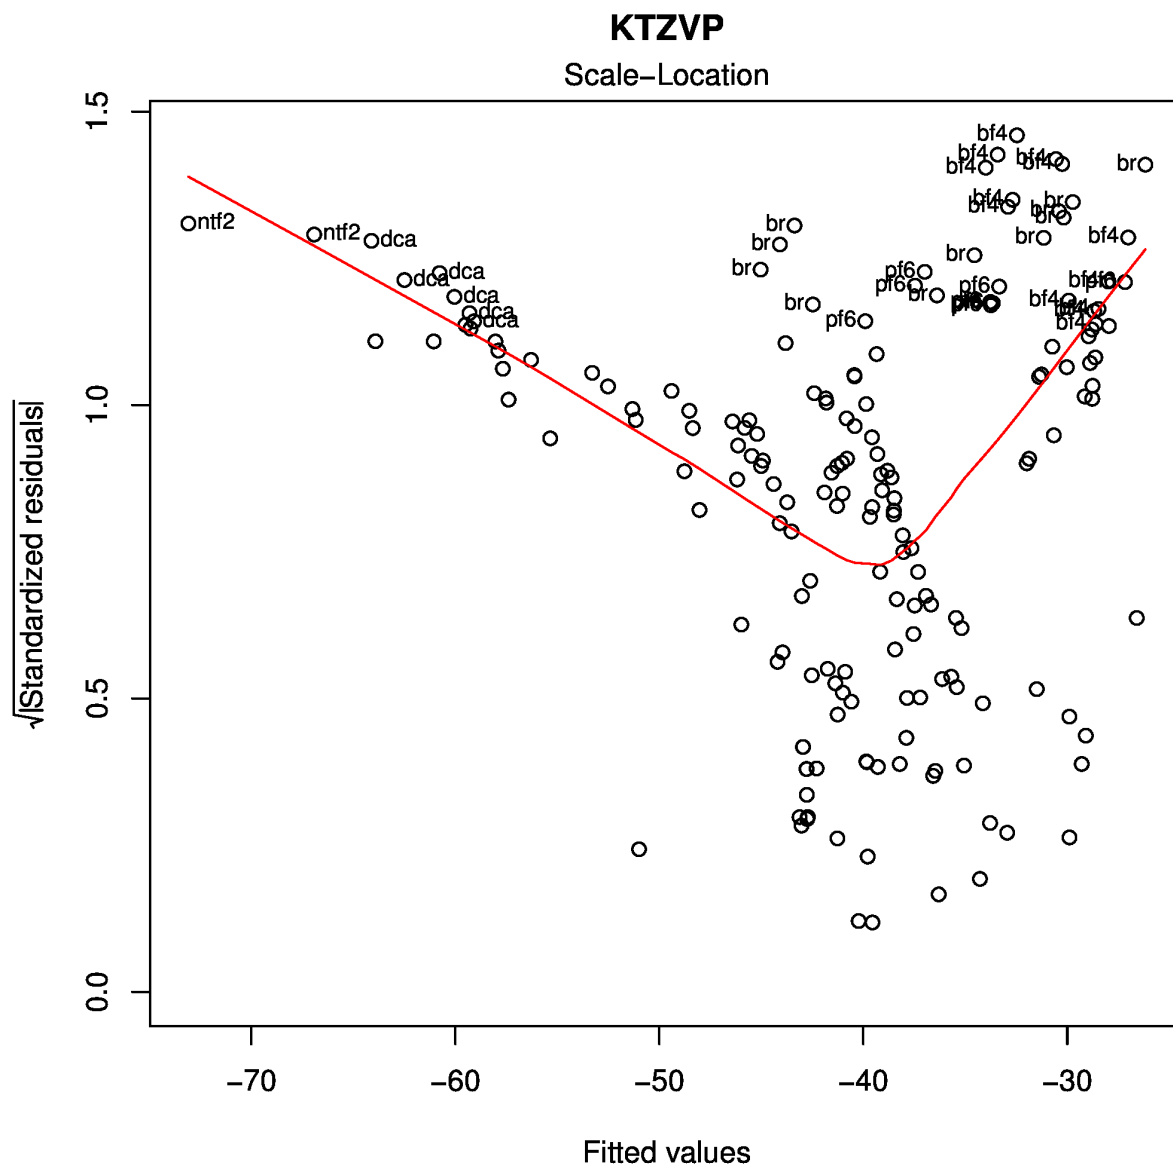

Figure S 11: Scale-Location plot







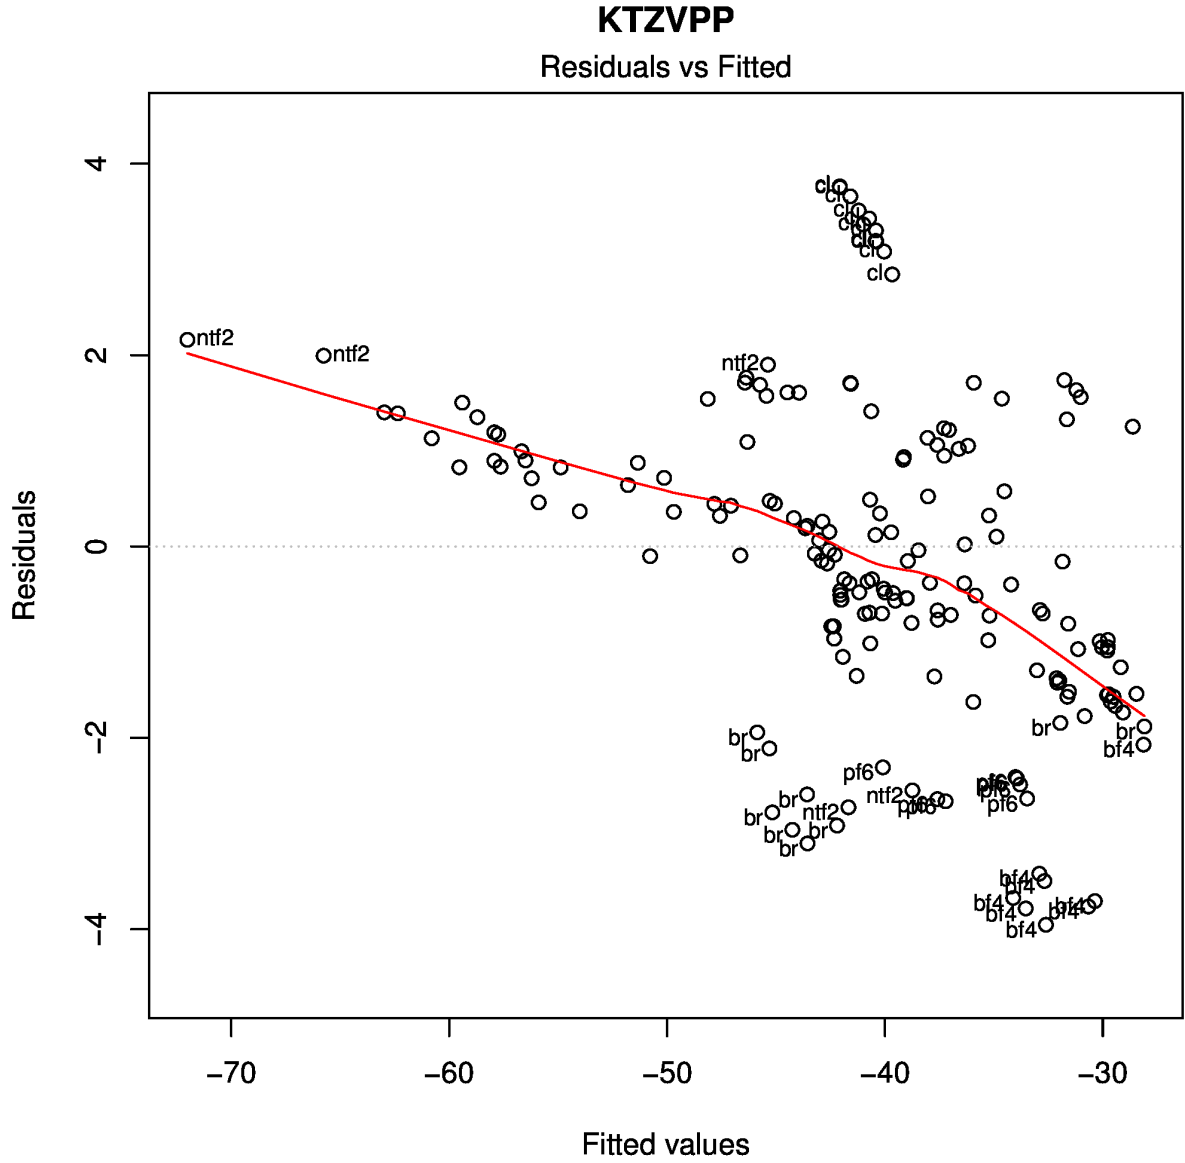

Figure S 13: Residuals vs Fitted values



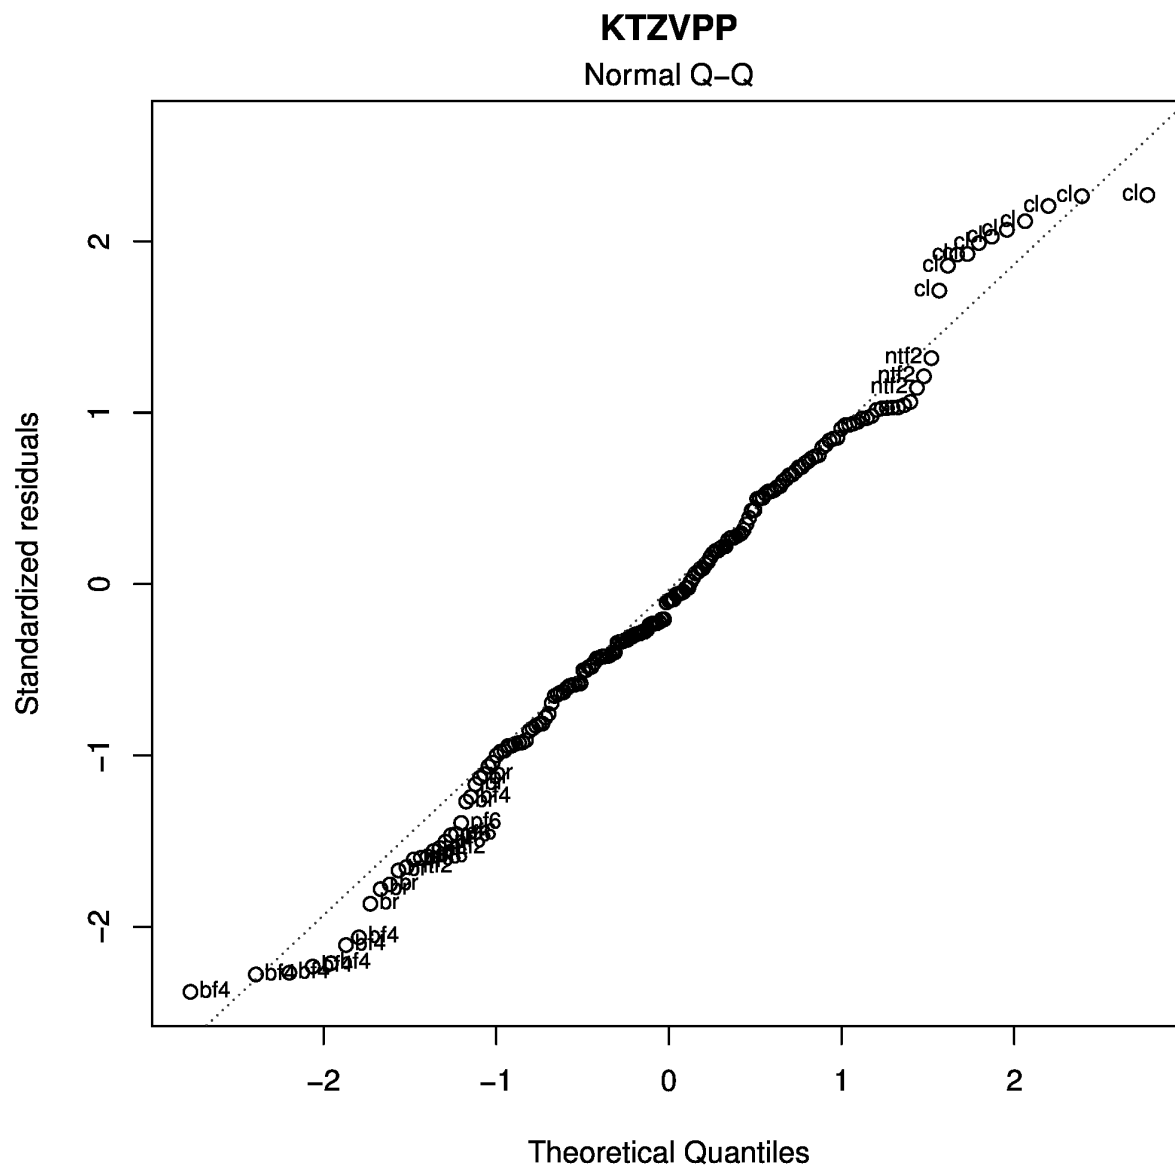

Figure S 14: Q-Q plot



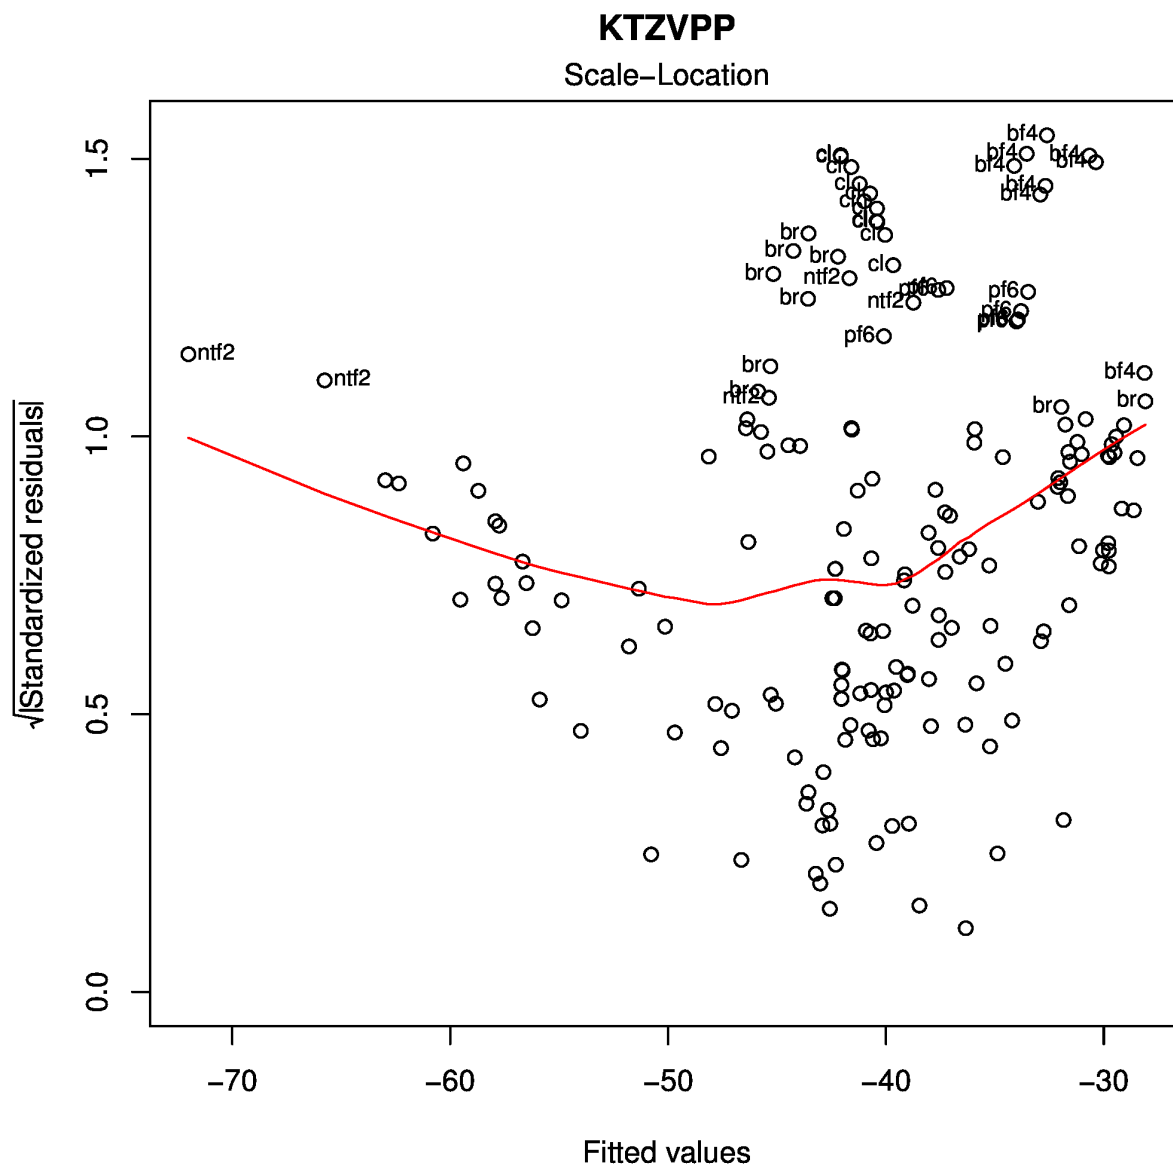

Figure S 15: Scale-Location plot







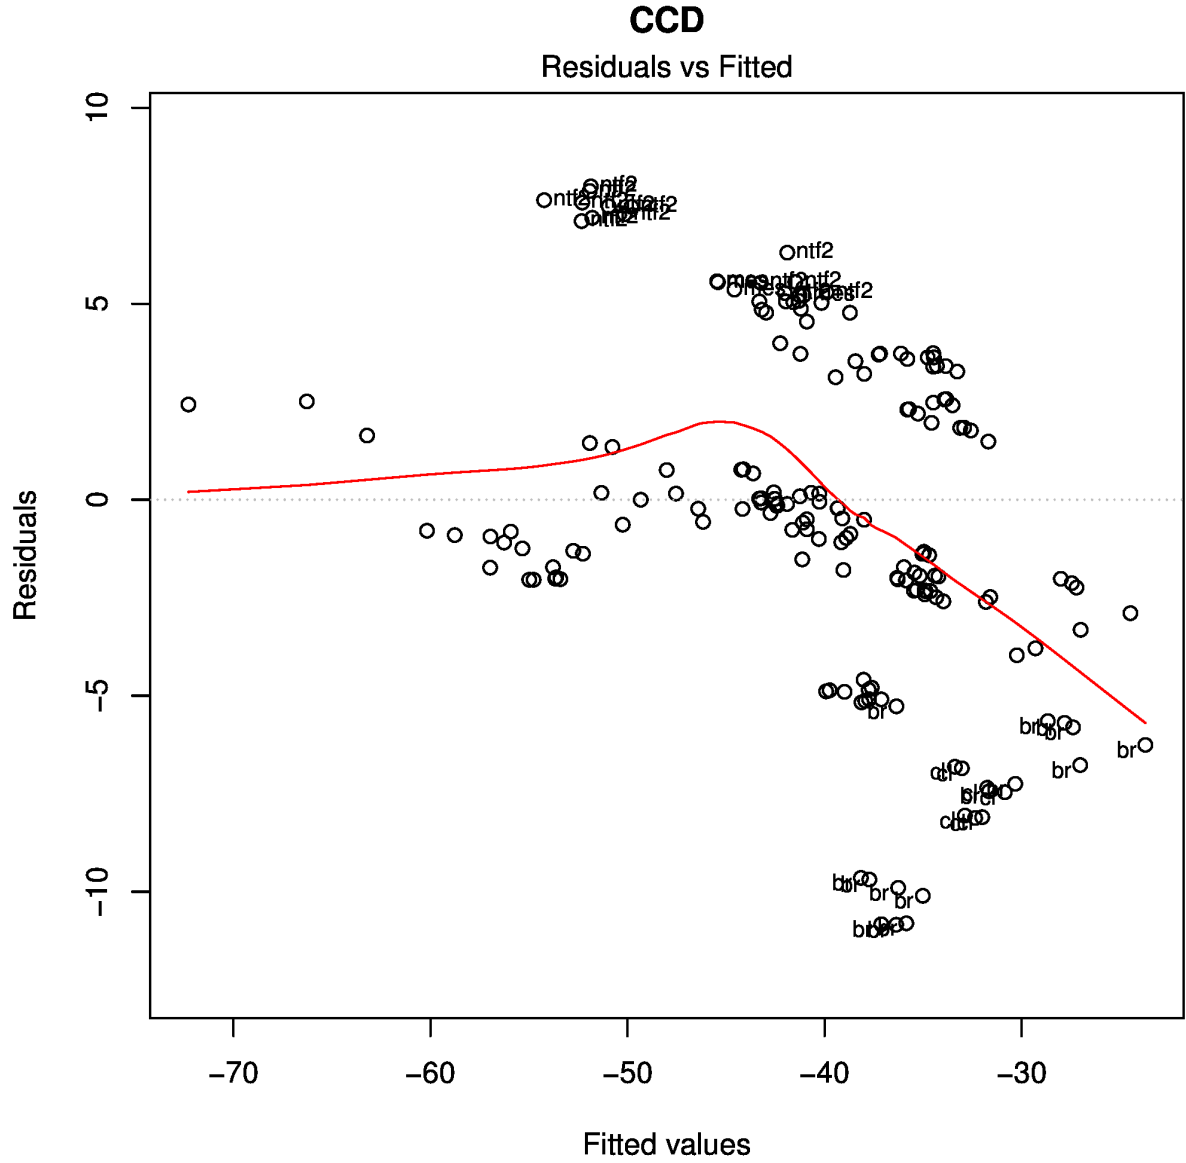

Figure S 17: Residuals vs Fitted values











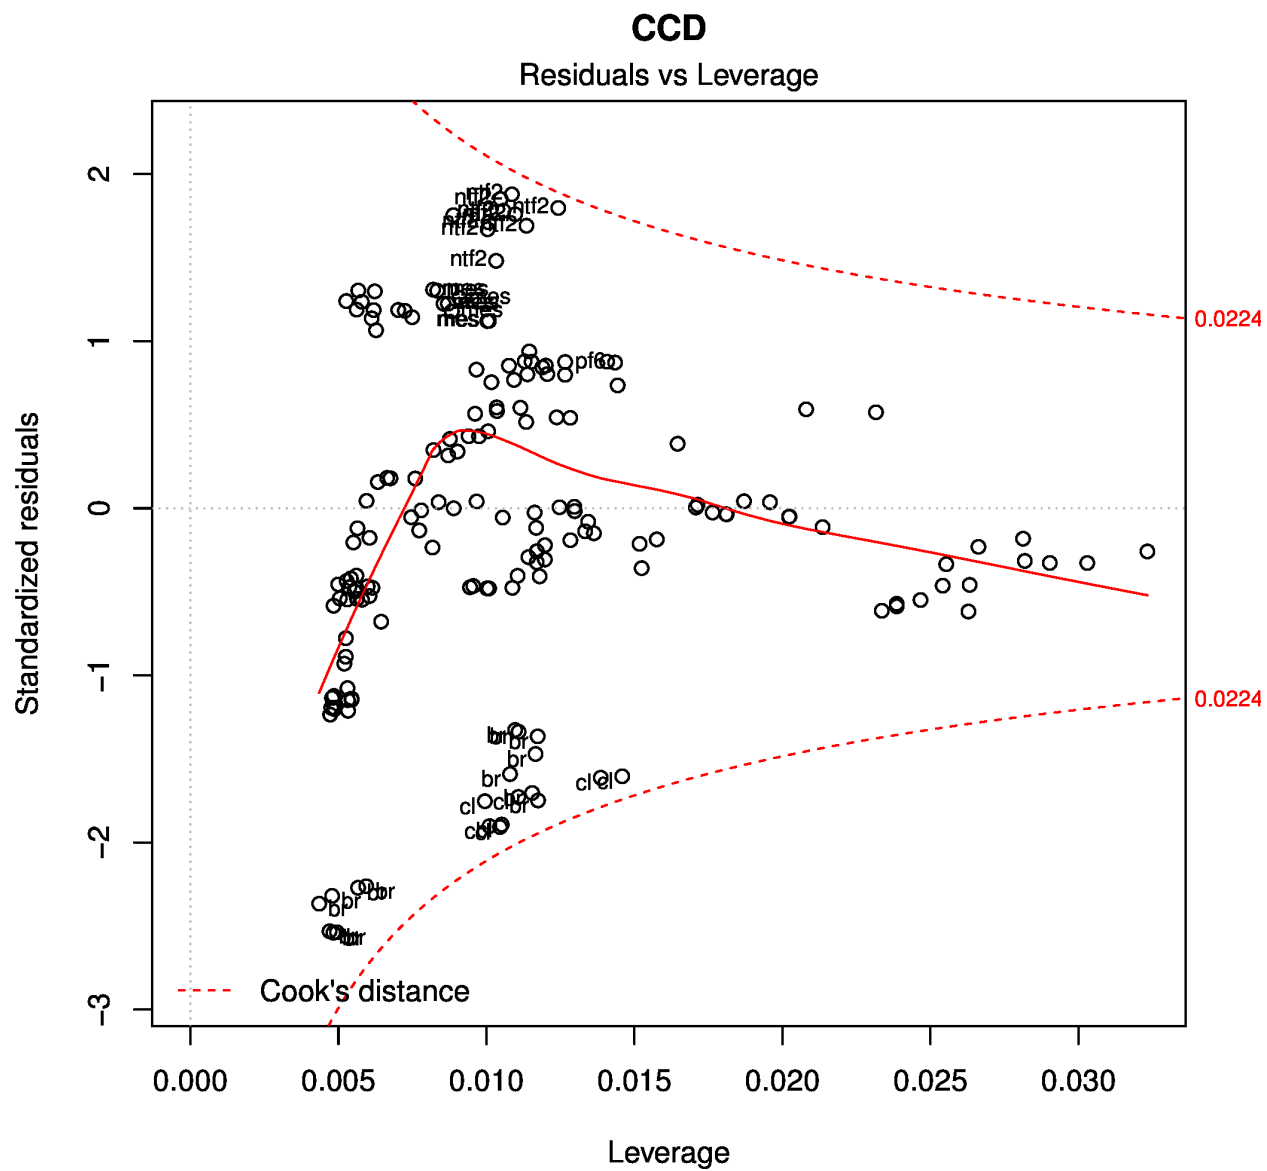

Figure S 20: Residuals vs Leverage plot



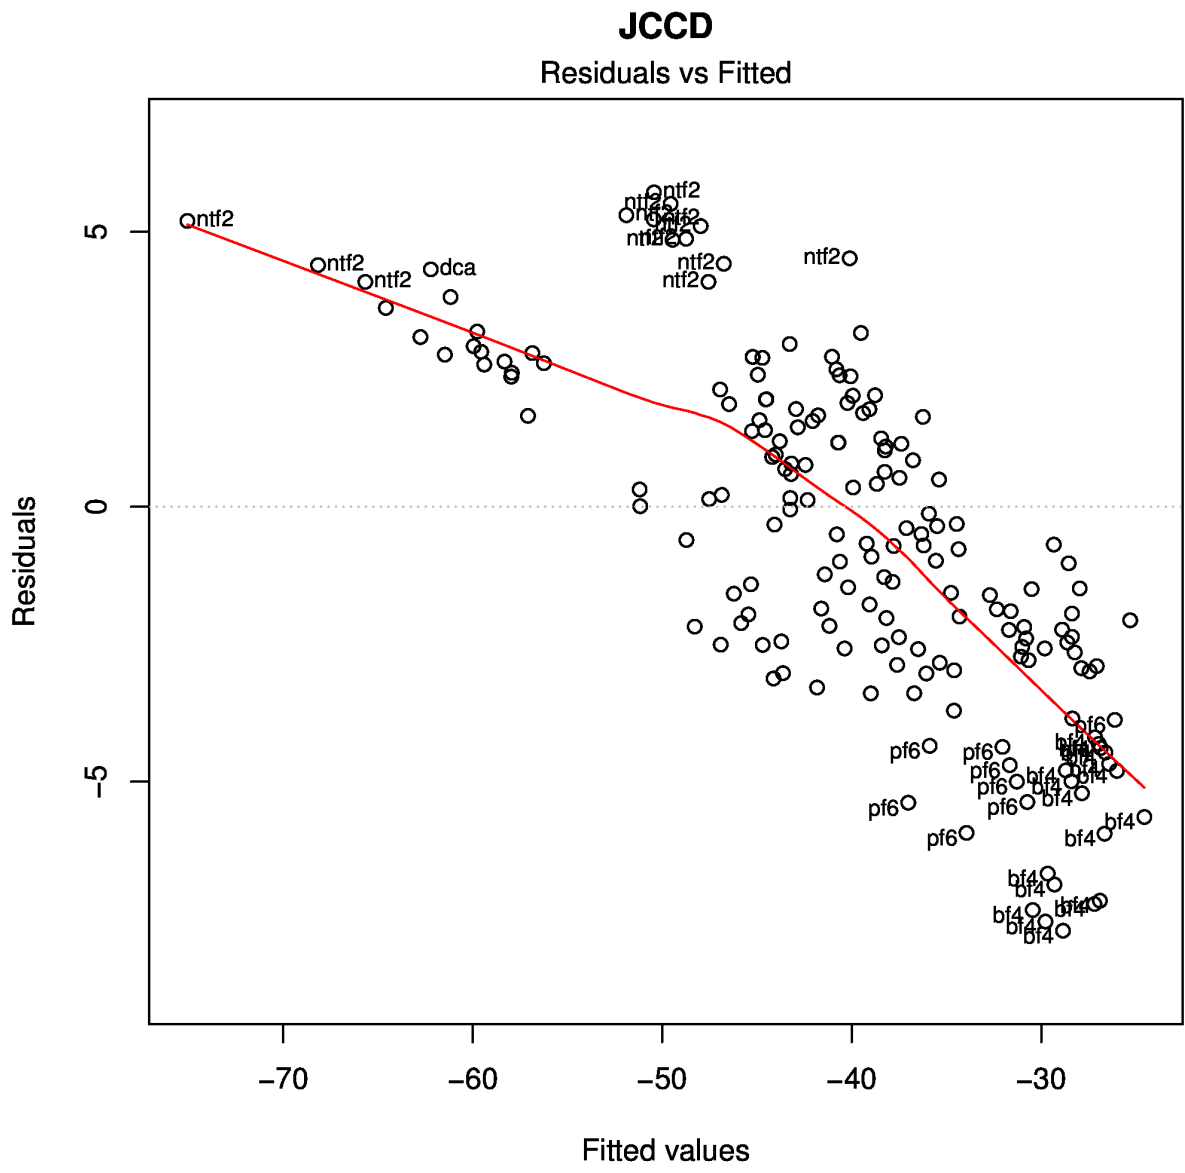

Figure S 21: Residuals vs Fitted values



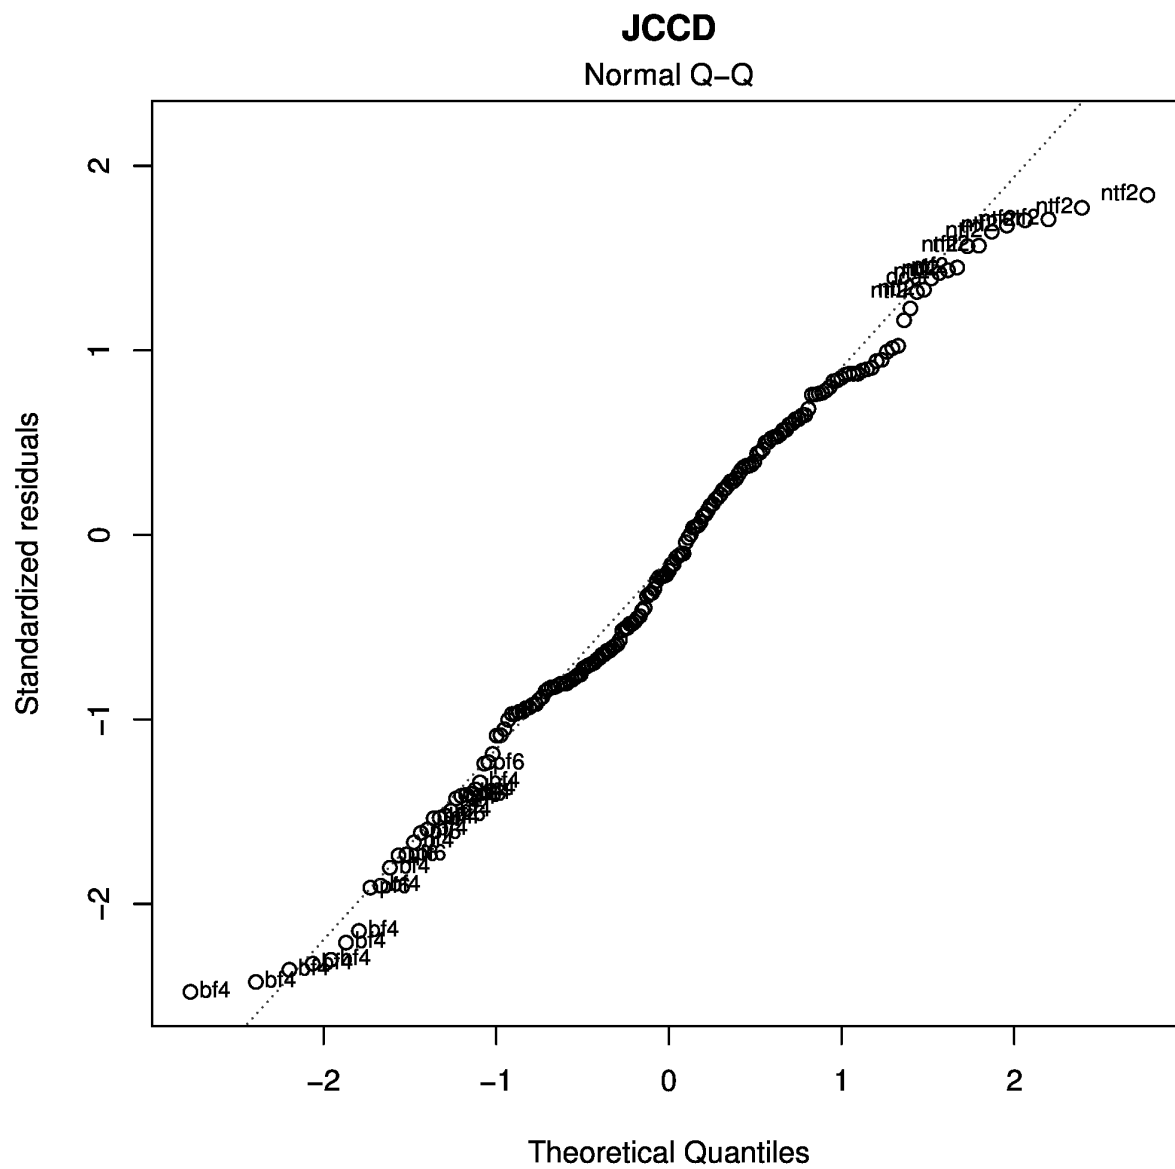

Figure S 22: Q-Q plot



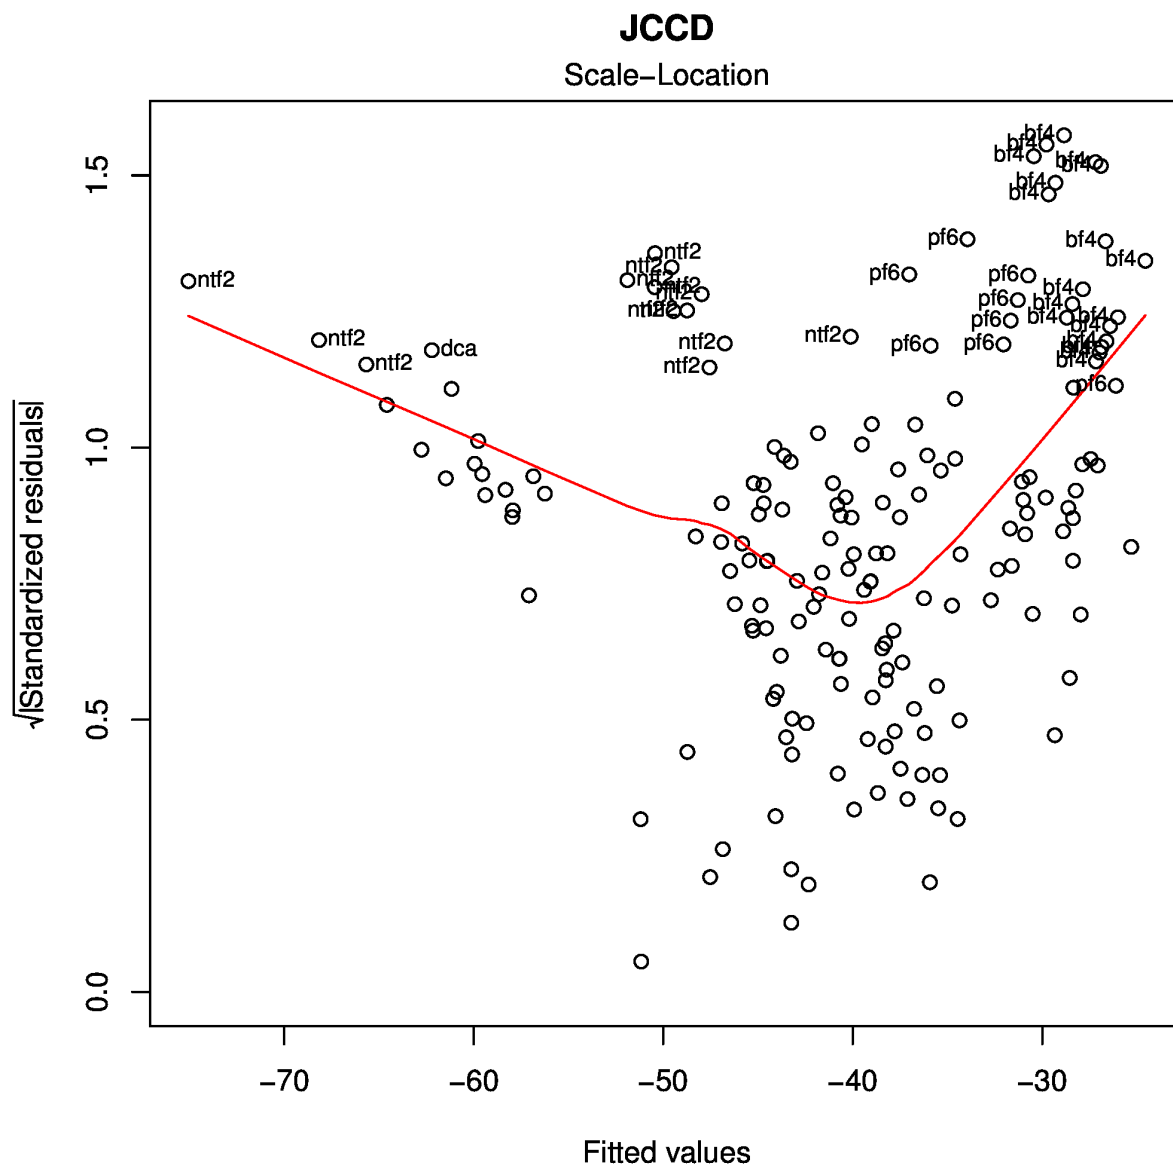

Figure S 23: Scale-Location plot



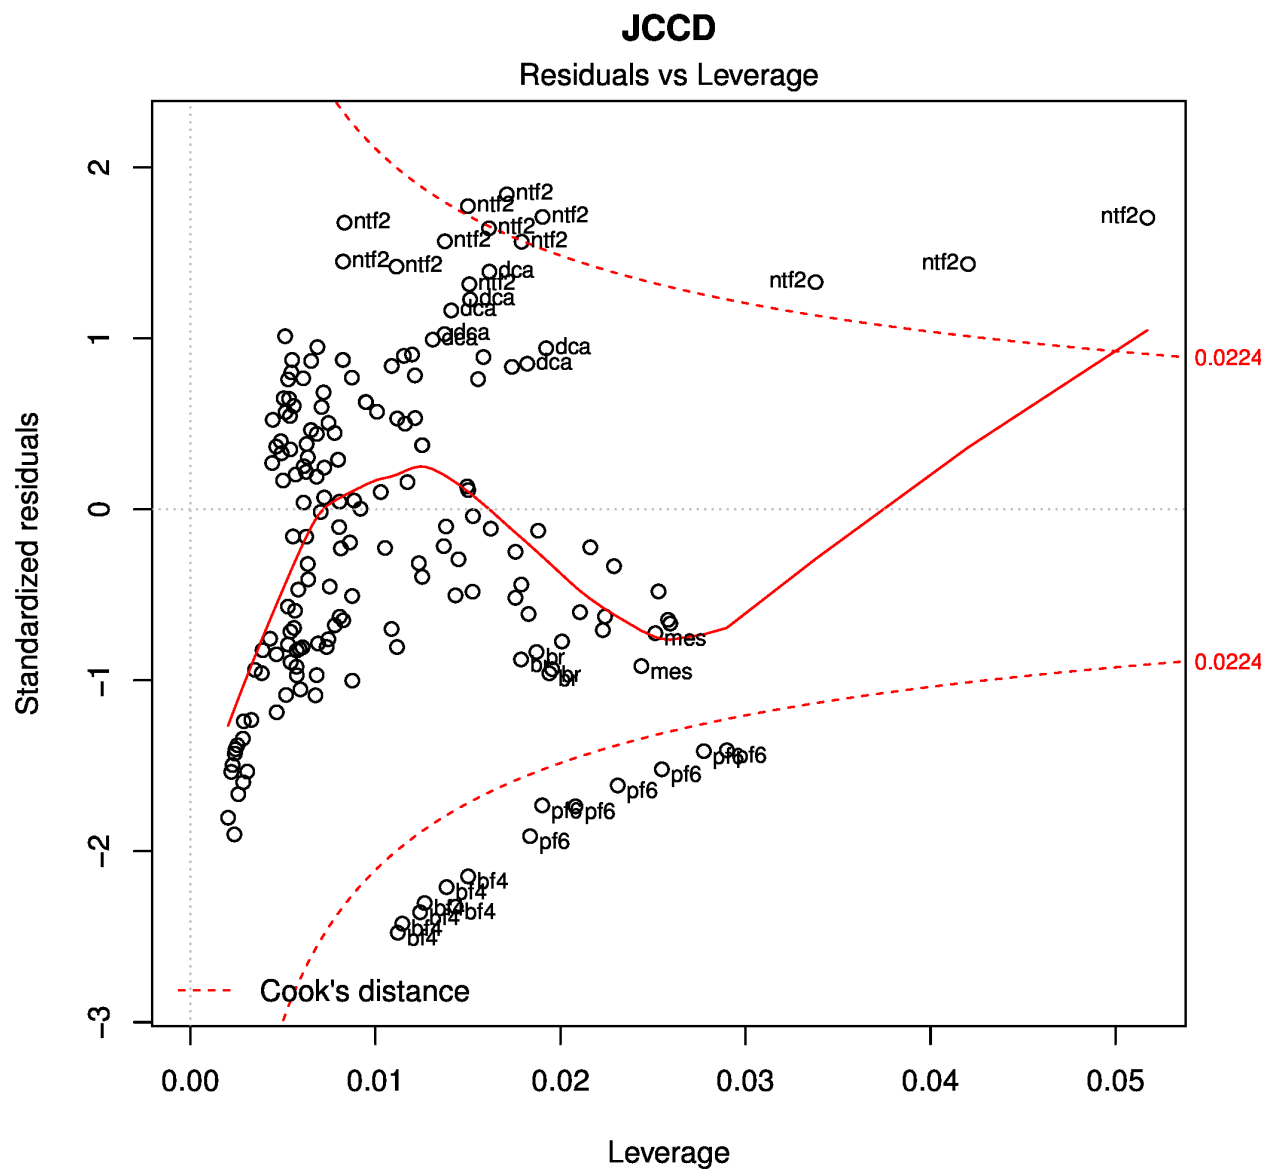

Figure S 24: Residuals vs Leverage plot



3.1.7 ACCD basis set

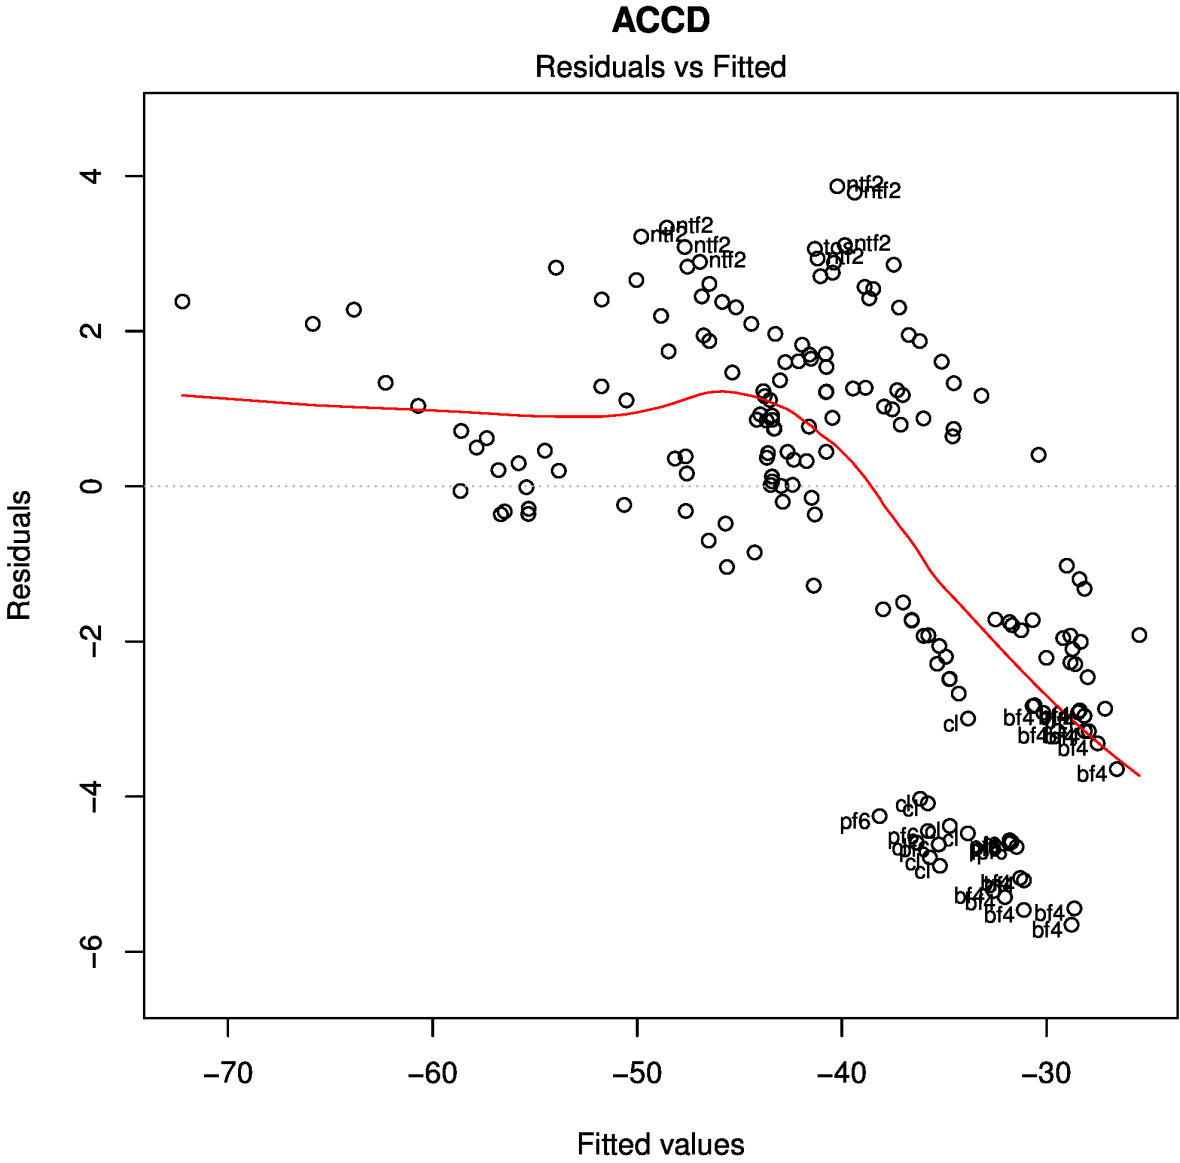

Figure S 25: Residuals vs Fitted values



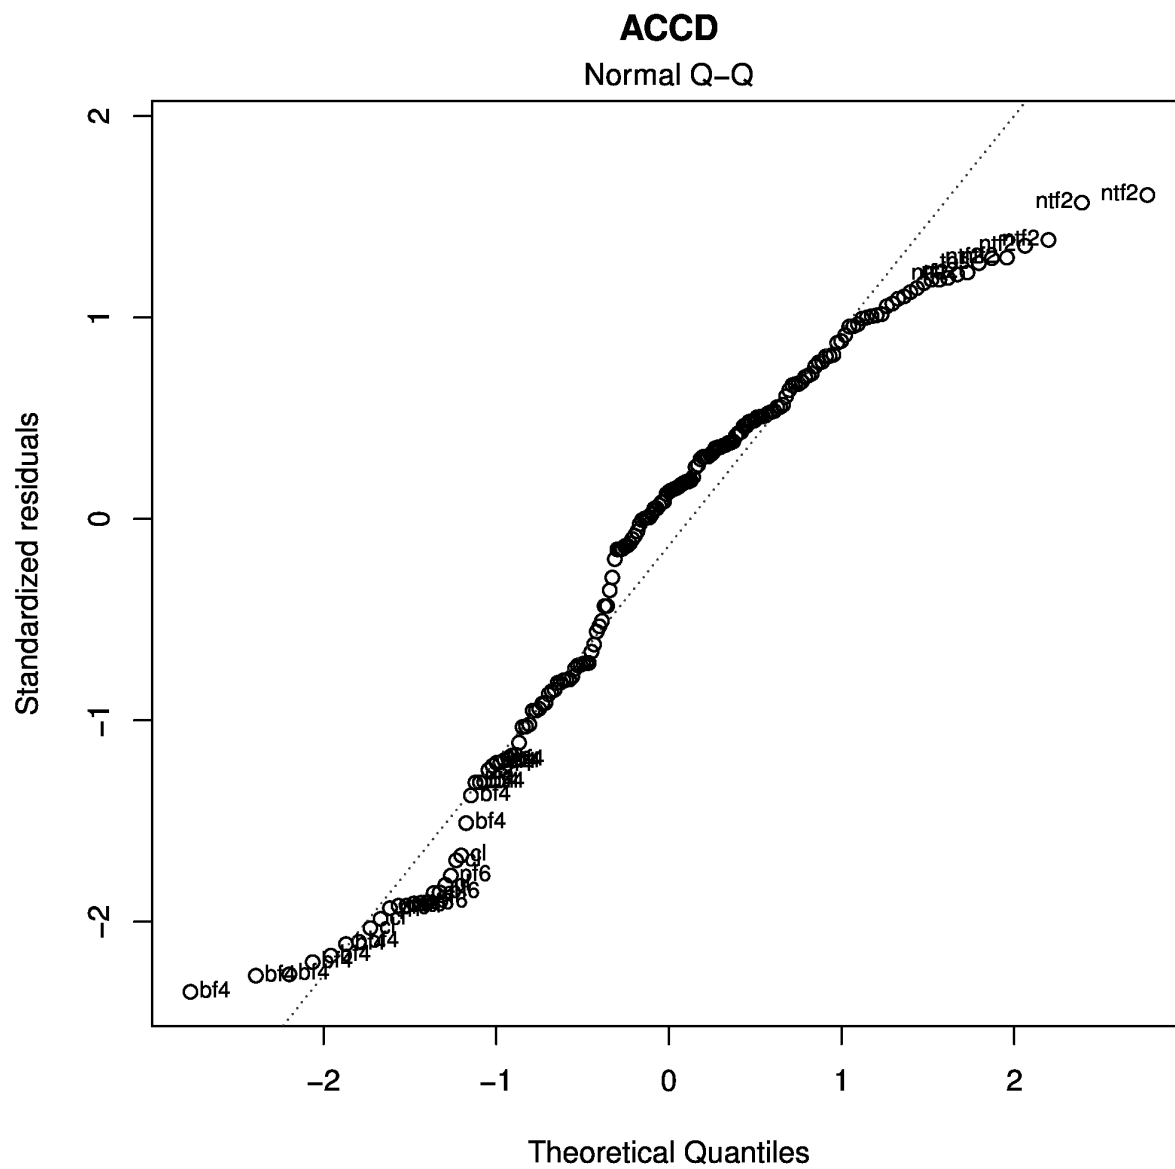

Figure S 26: Q-Q plot



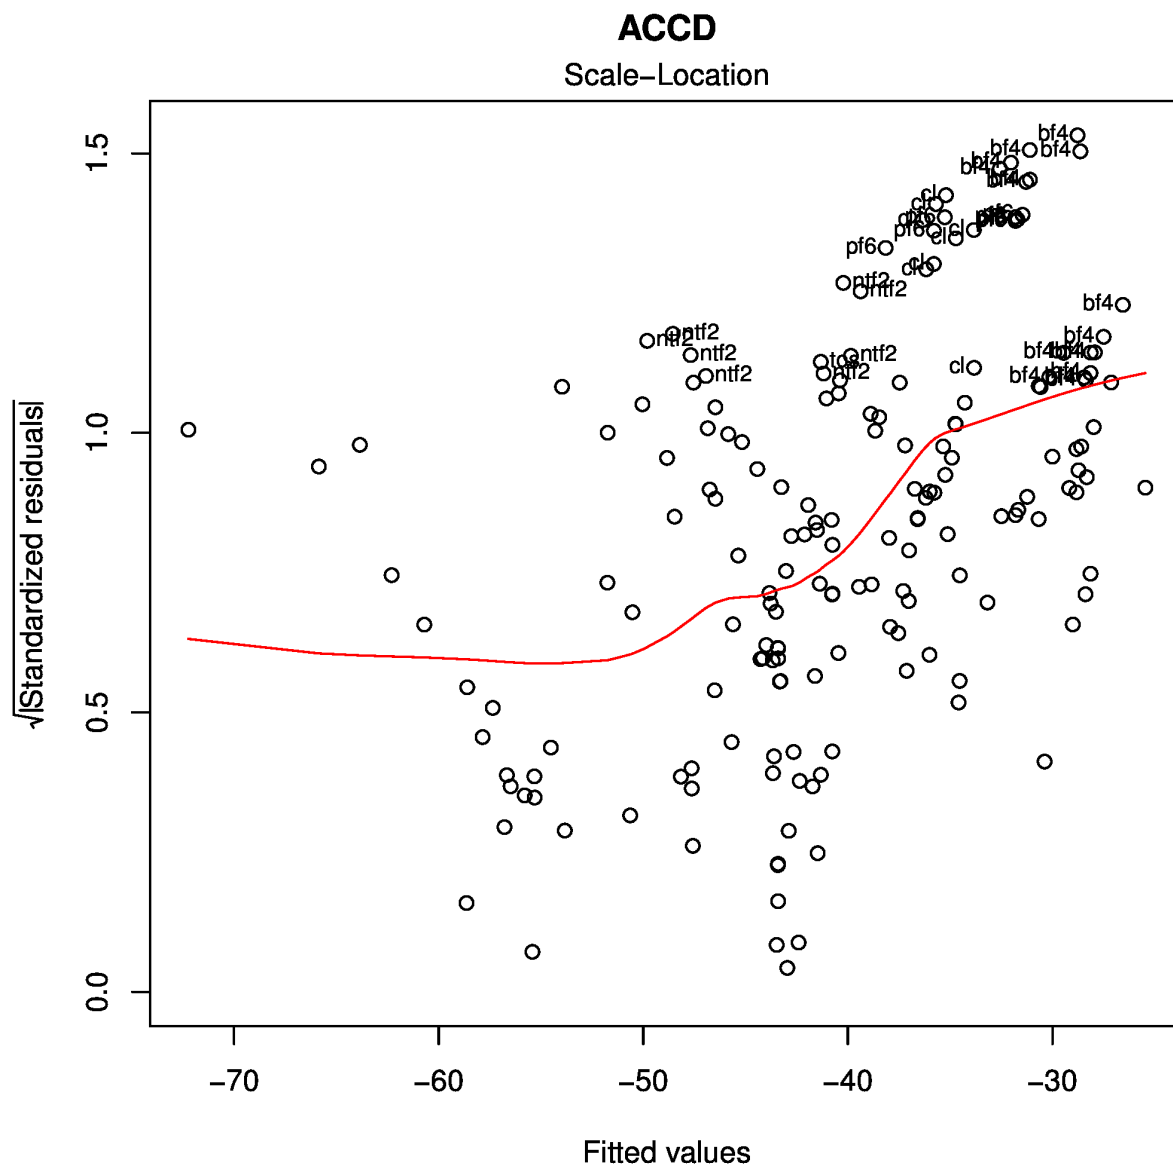

Figure S 27: Scale-Location plot



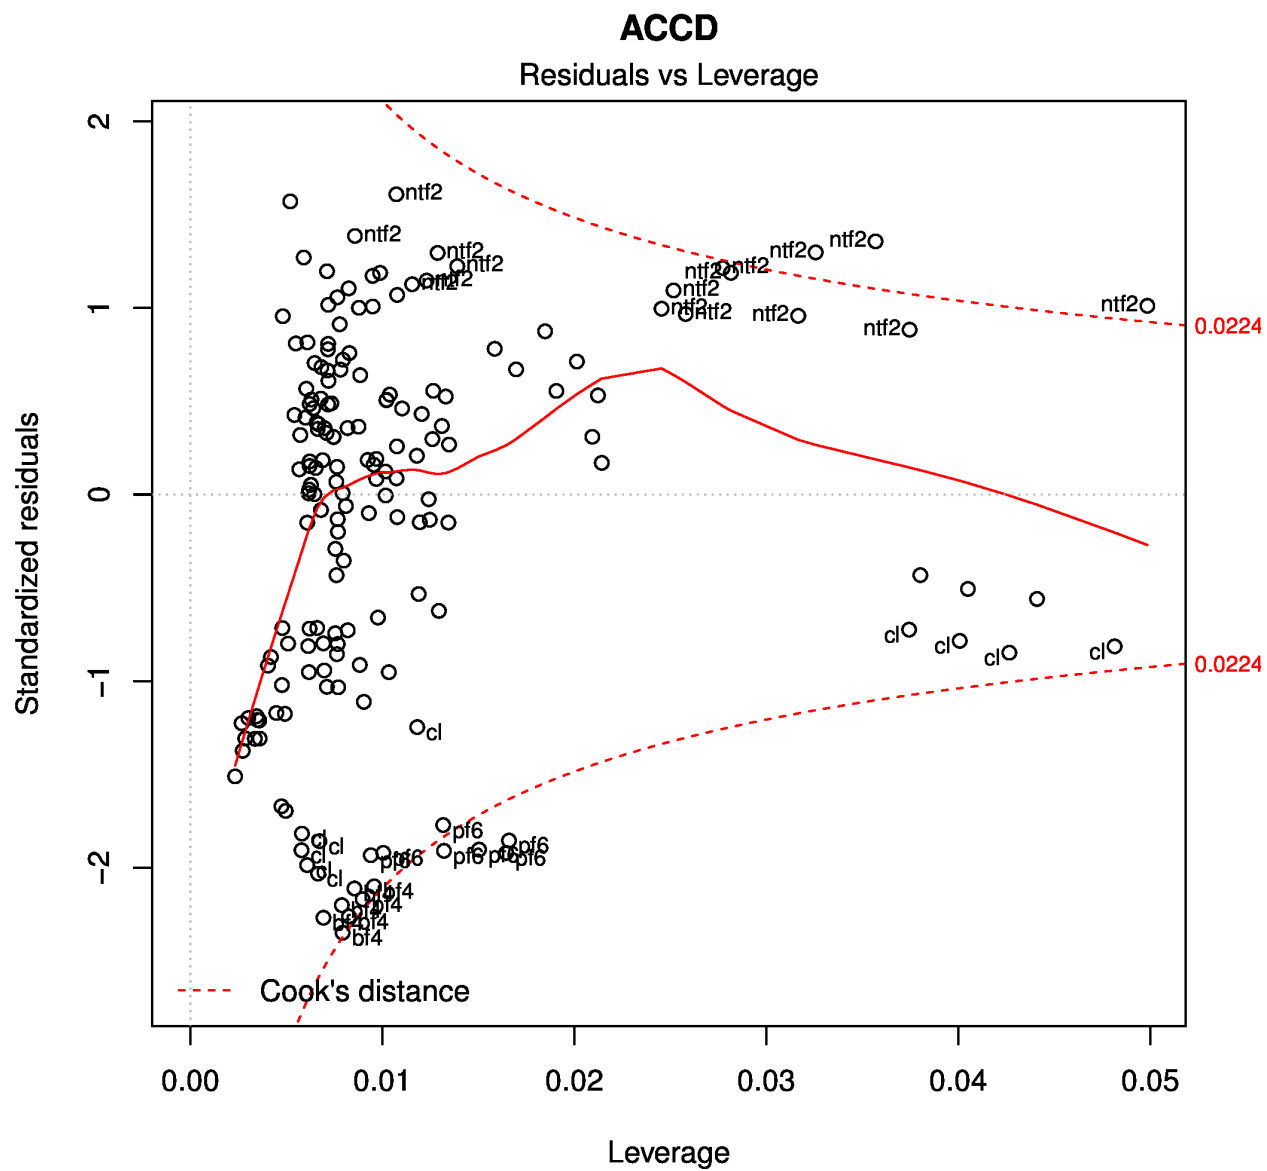

Figure S 28: Residuals vs Leverage plot



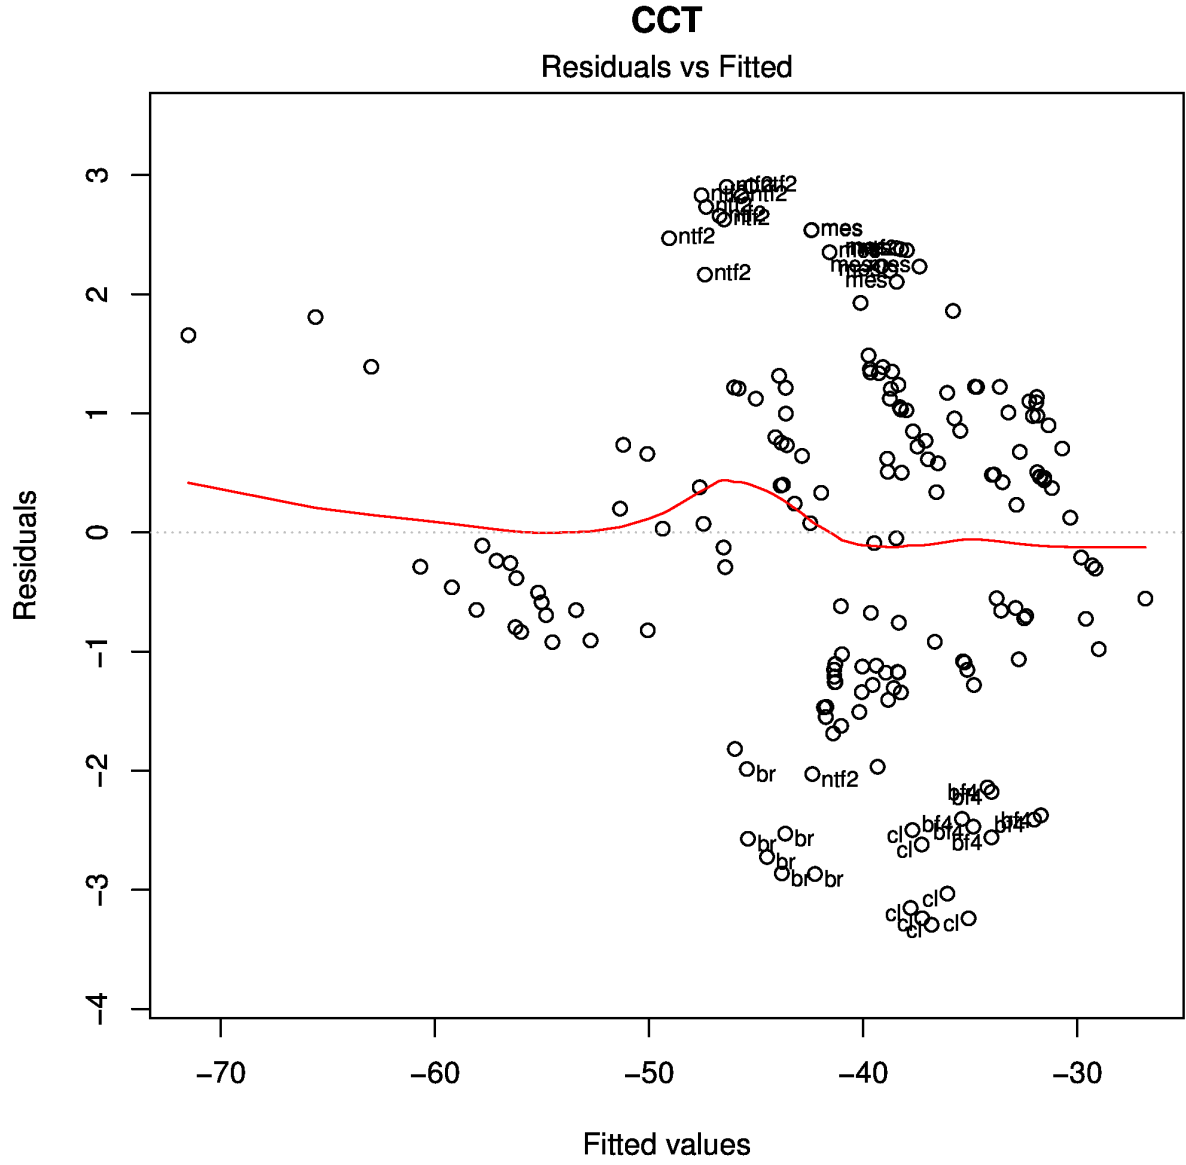

Figure S 29: Residuals vs Fitted values



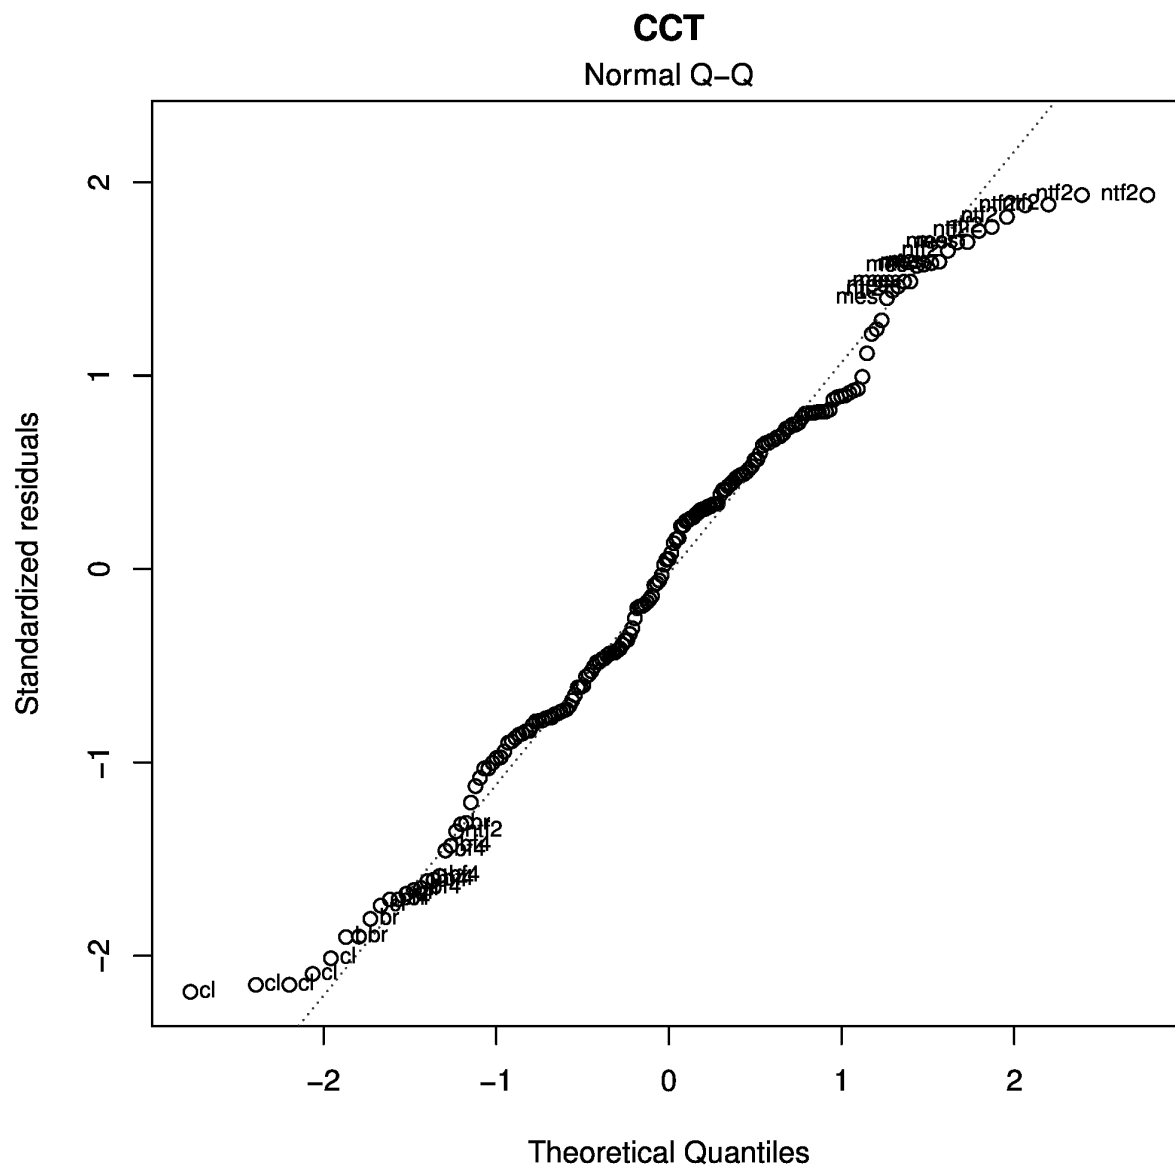

Figure S 30: Q-Q plot



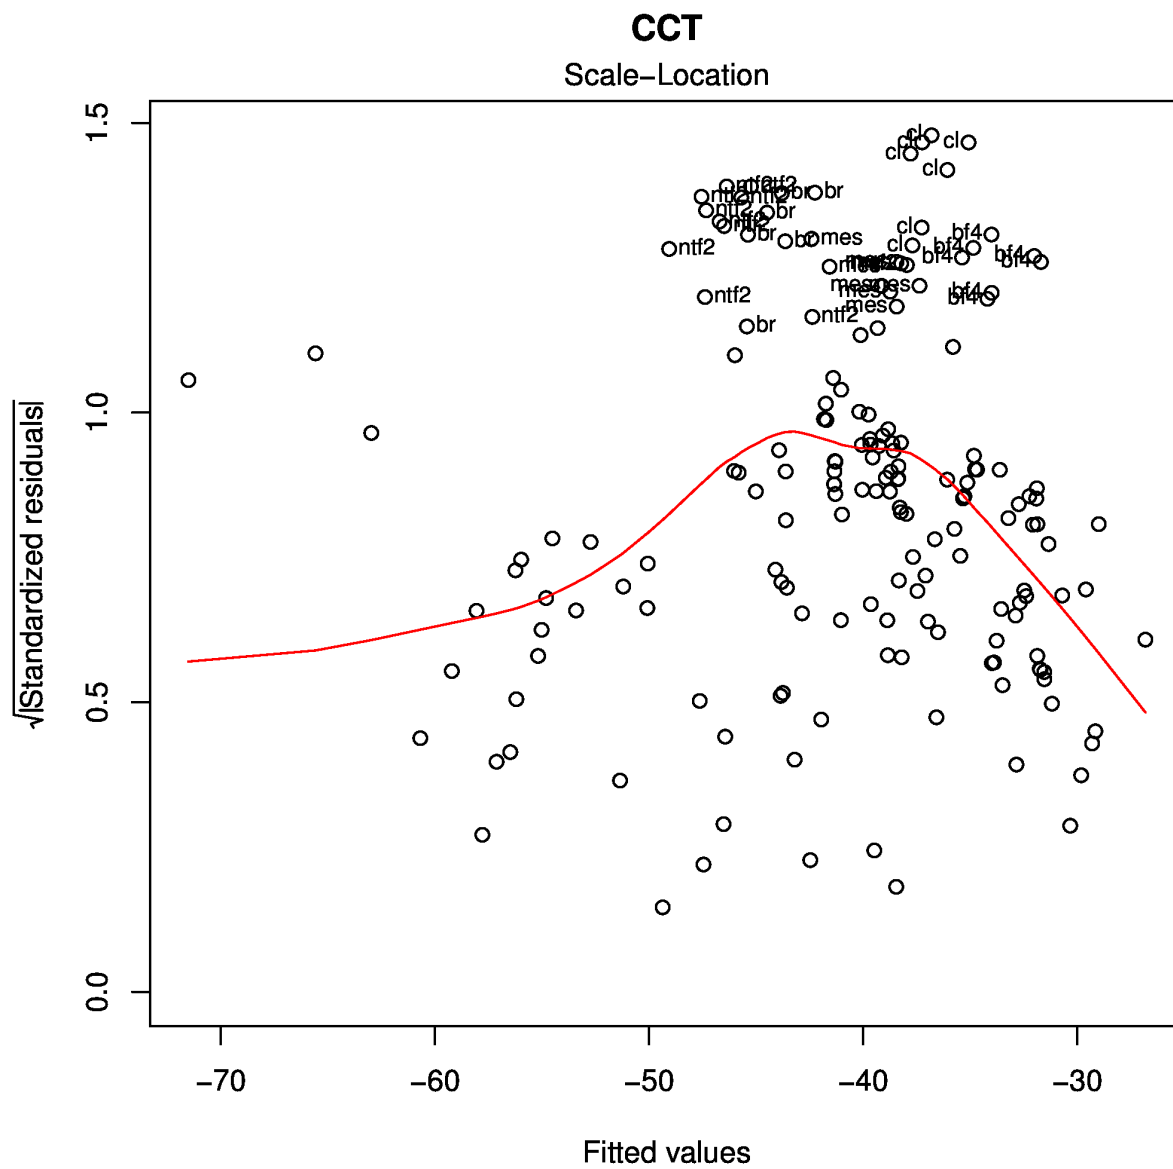

Figure S 31: Scale-Location plot







### 3.1.9 MCCT basis set

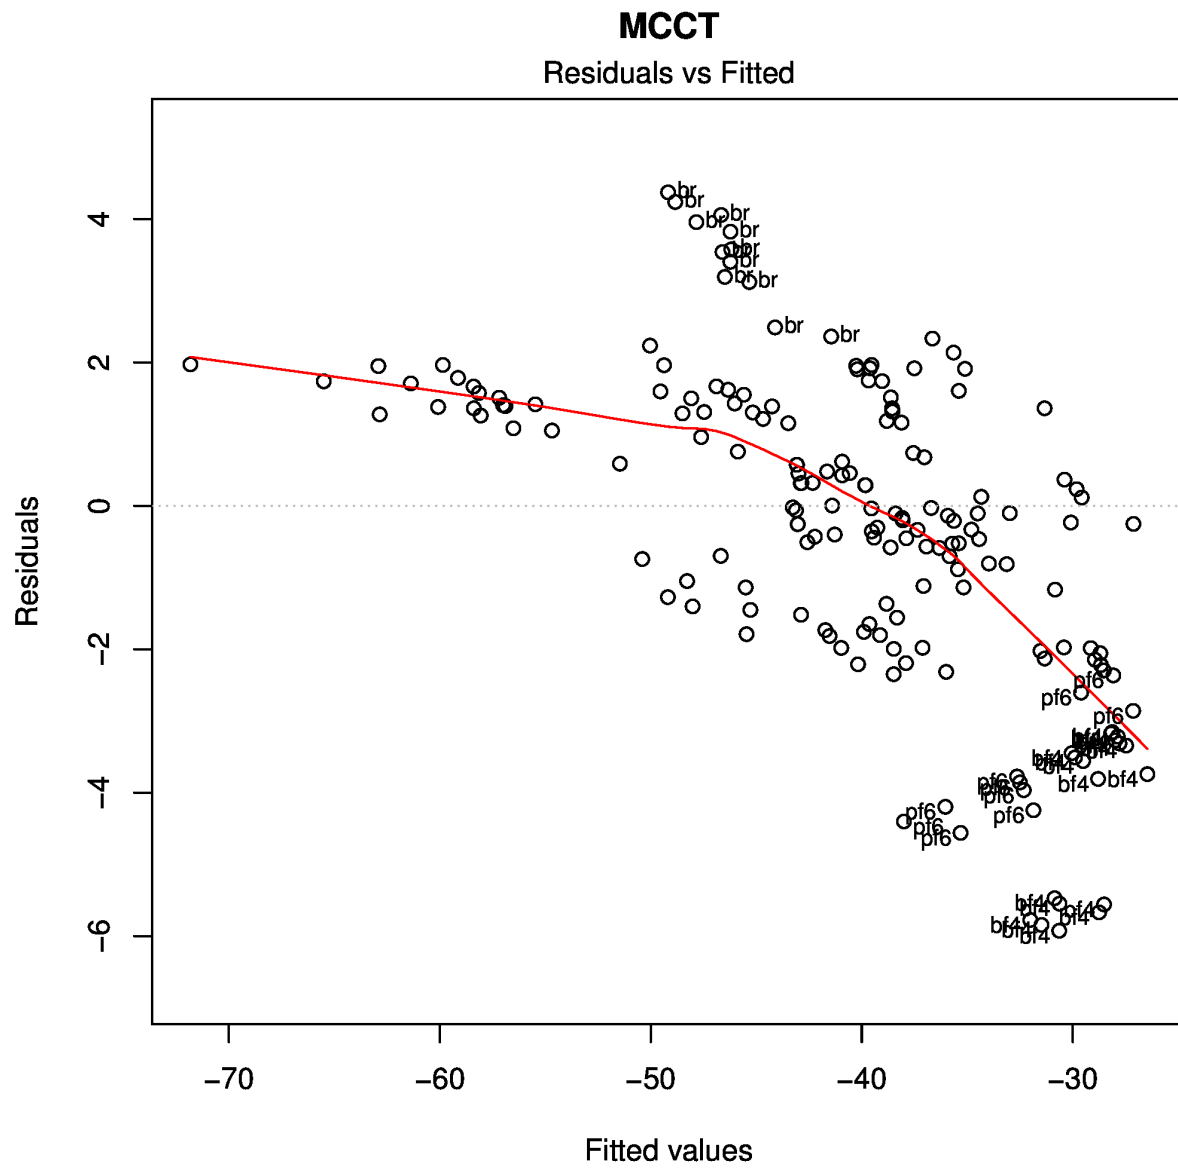

Figure S 33: Residuals vs Fitted values



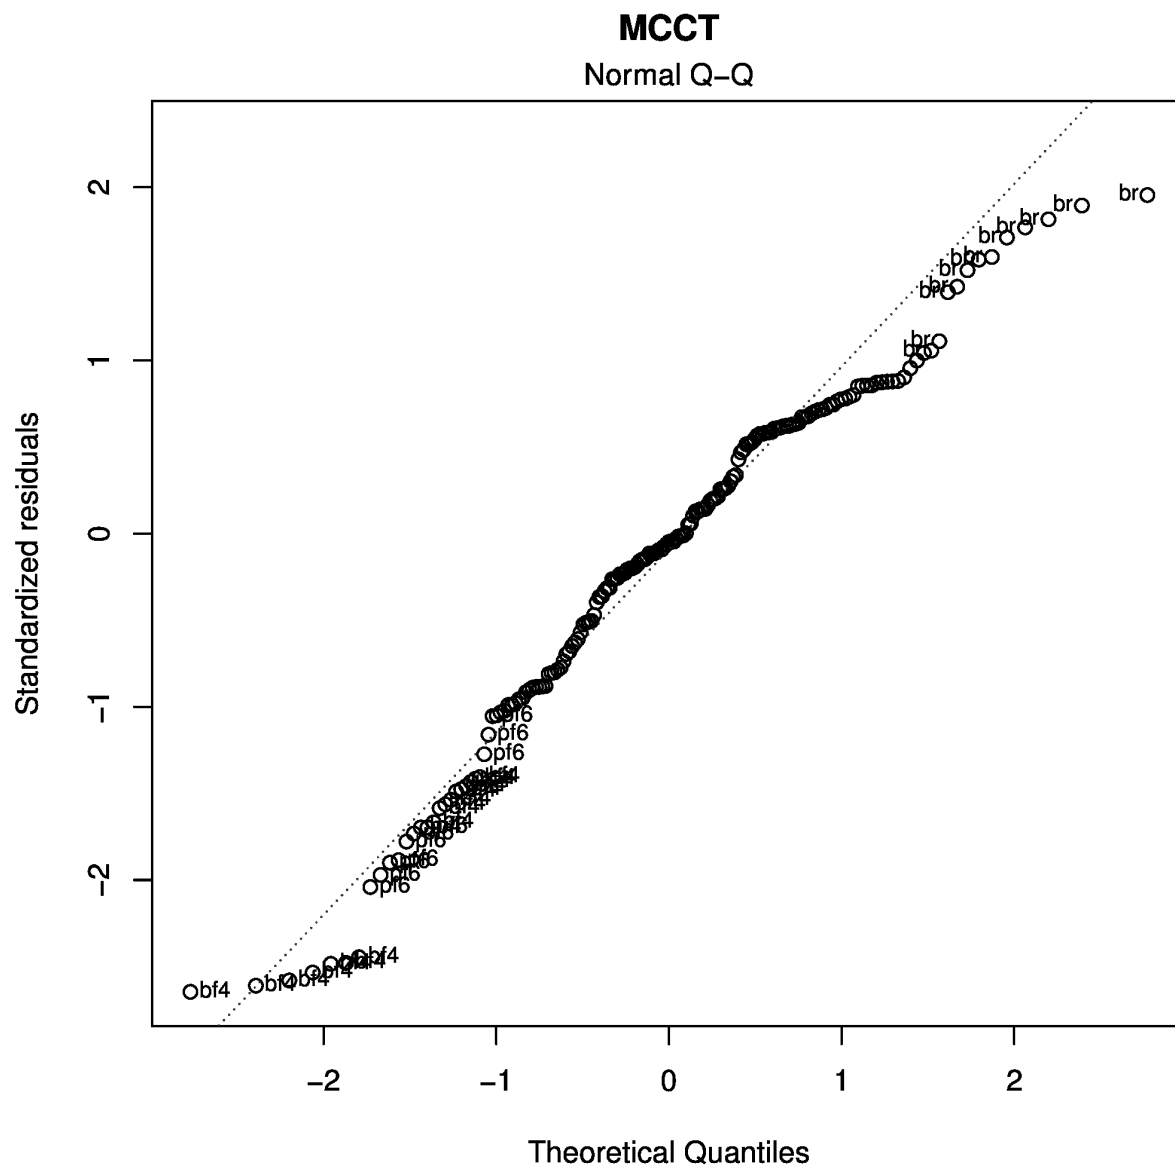

Figure S 34: Q-Q plot



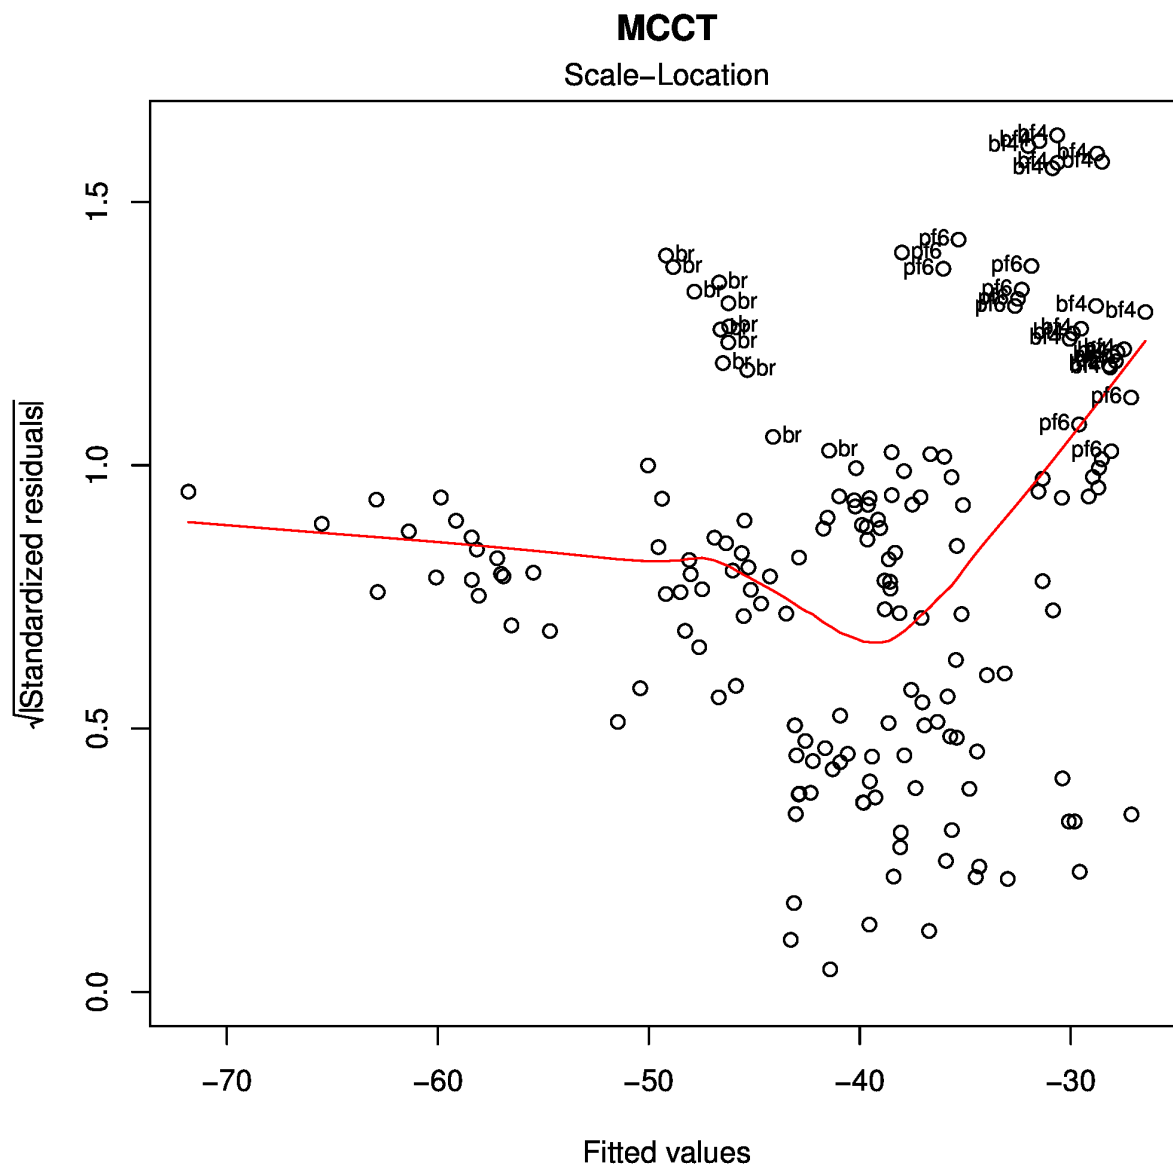

Figure S 35: Scale-Location plot



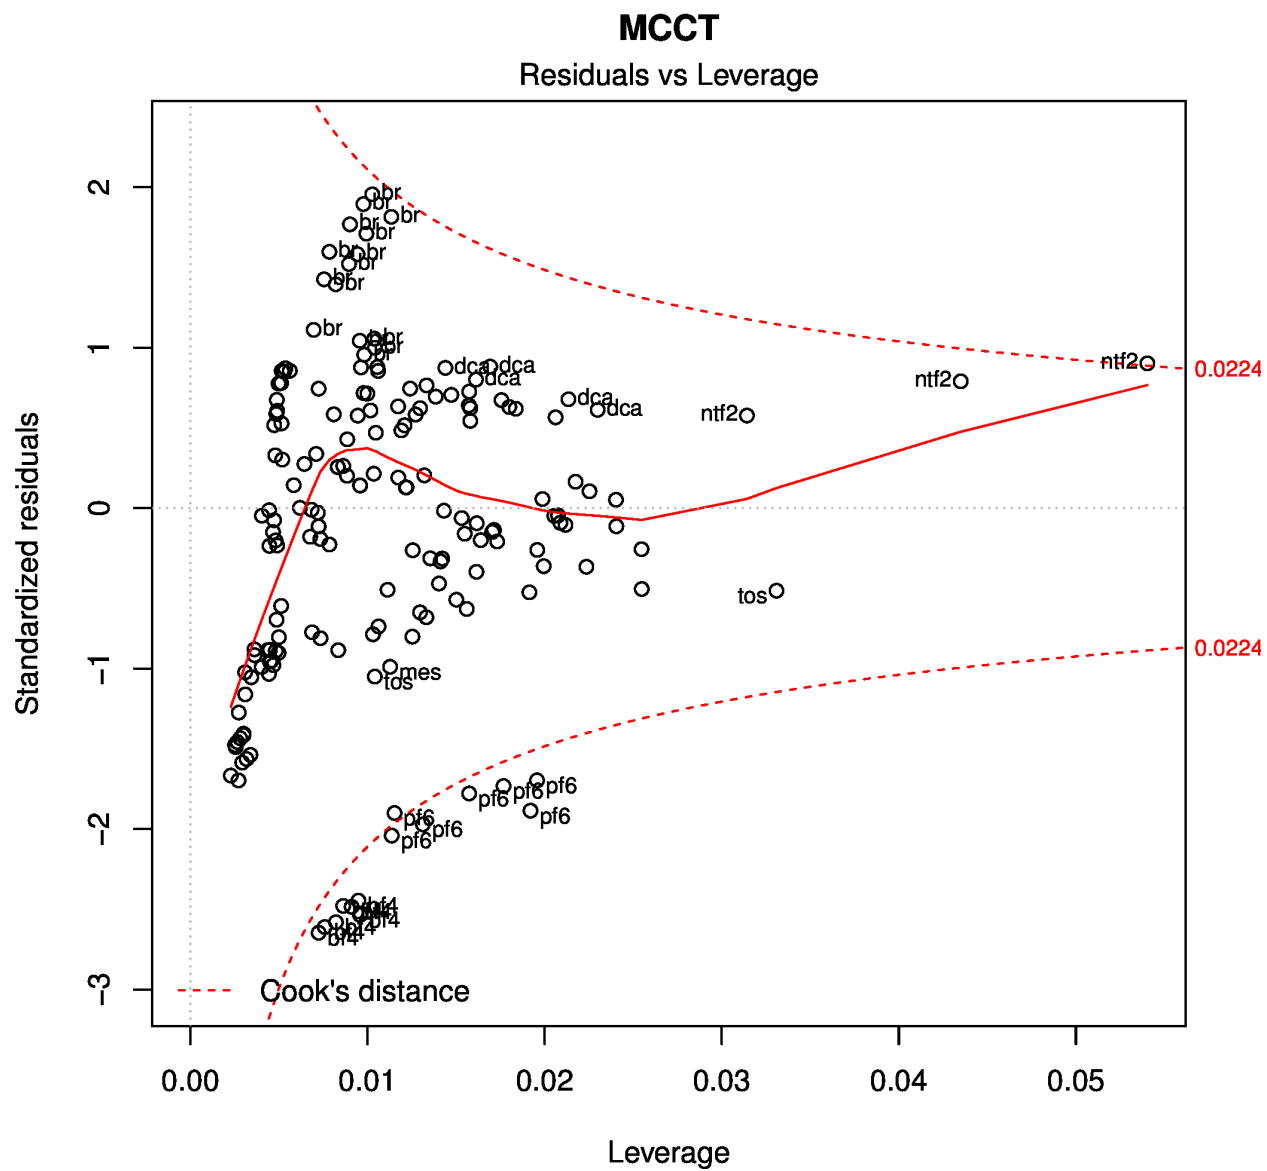

Figure S 36: Residuals vs Leverage plot



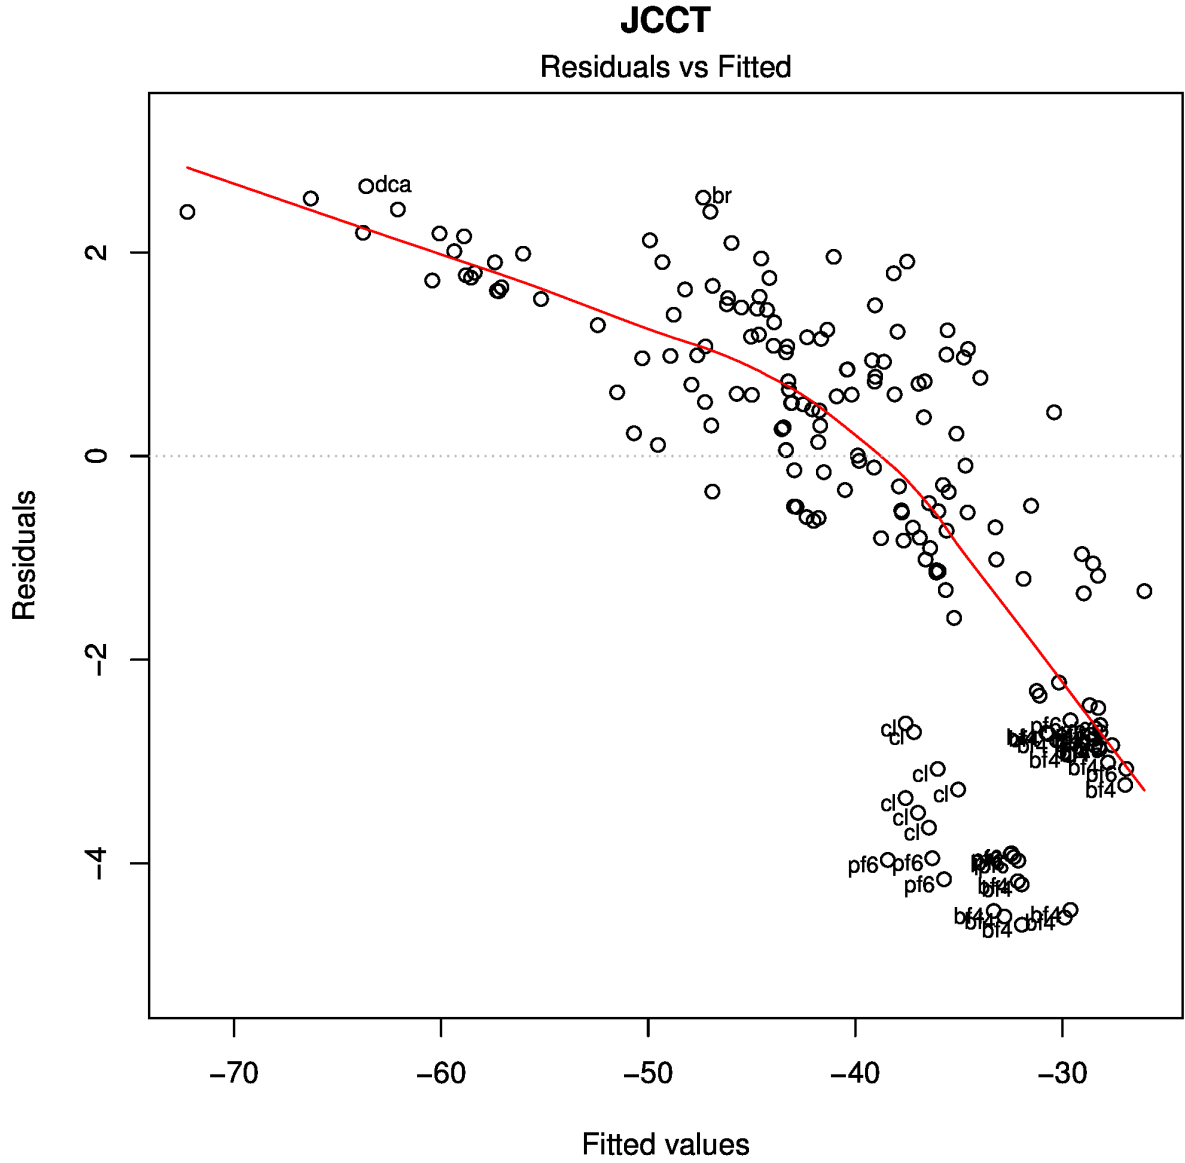

Figure S 37: Residuals vs Fitted values



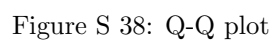



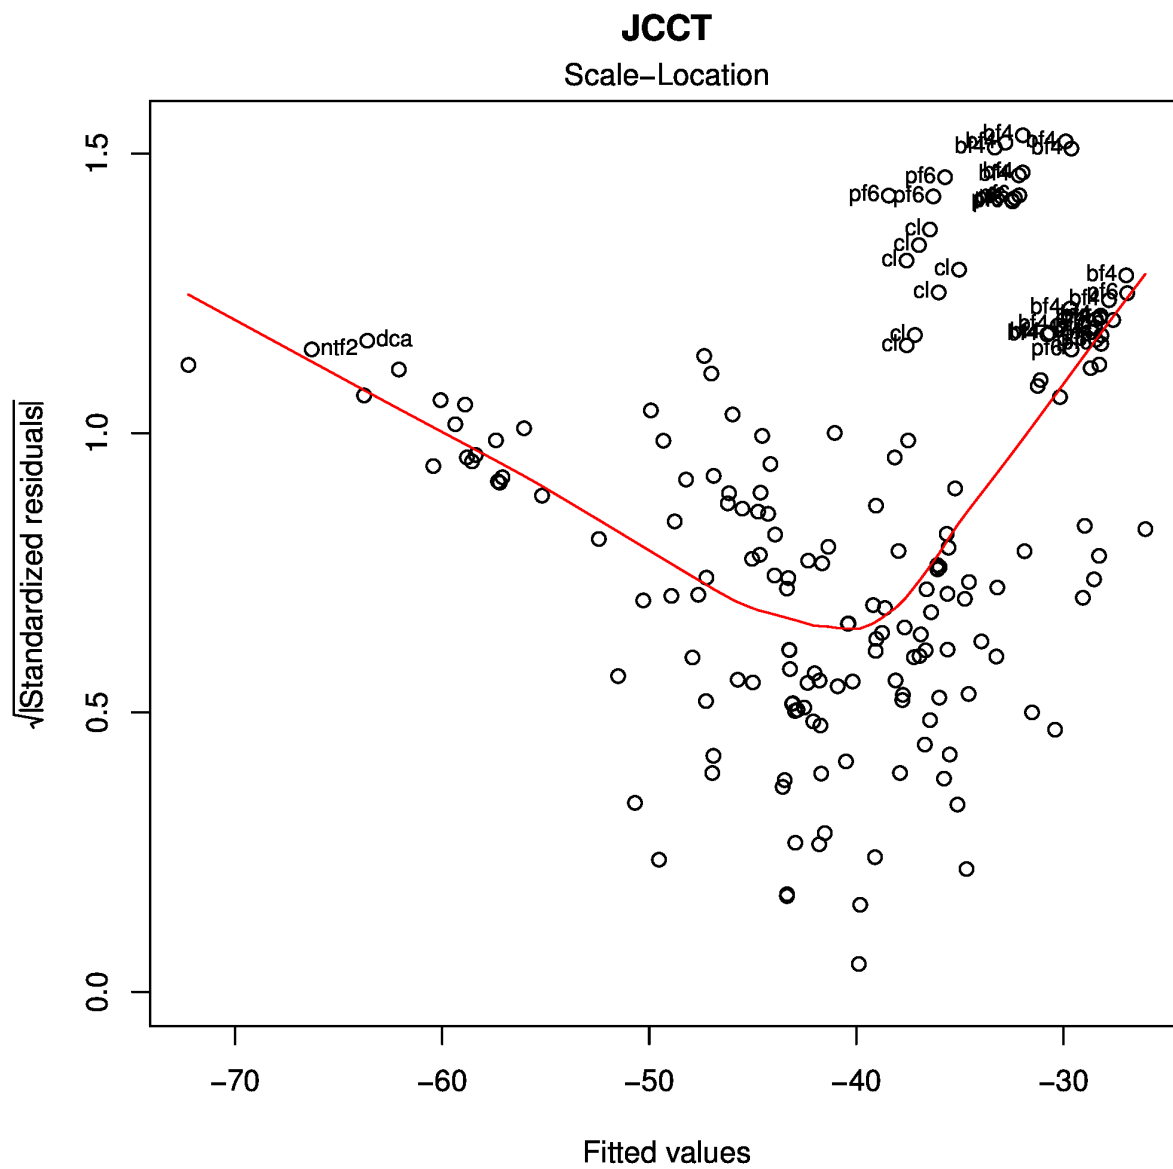

Figure S 39: Scale-Location plot



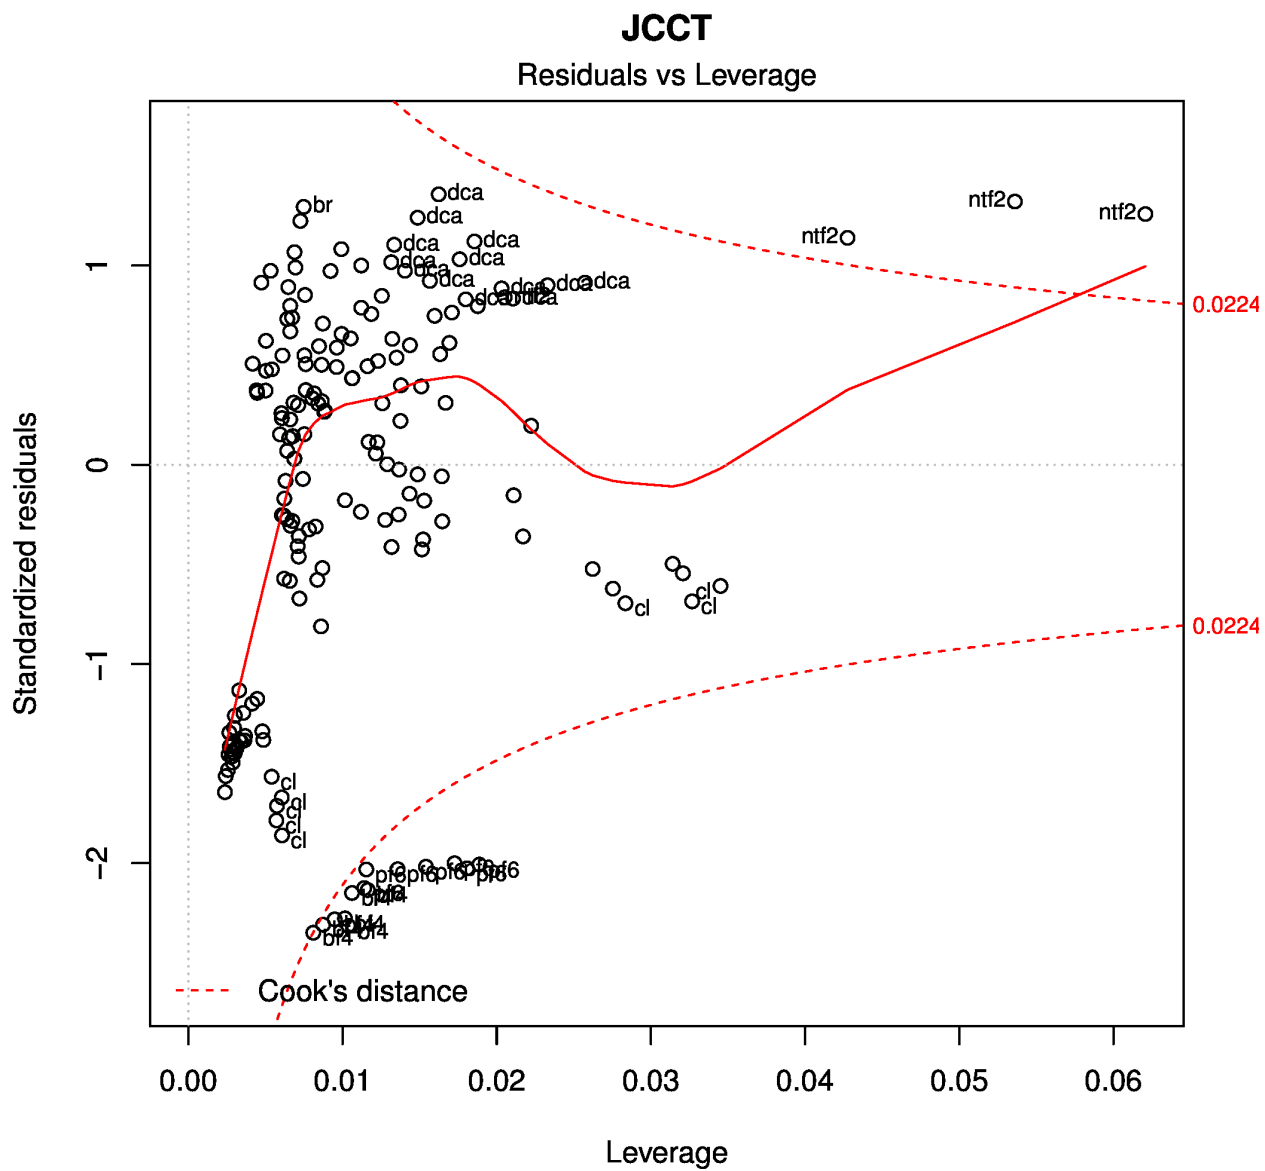

Figure S 40: Residuals vs Leverage plot



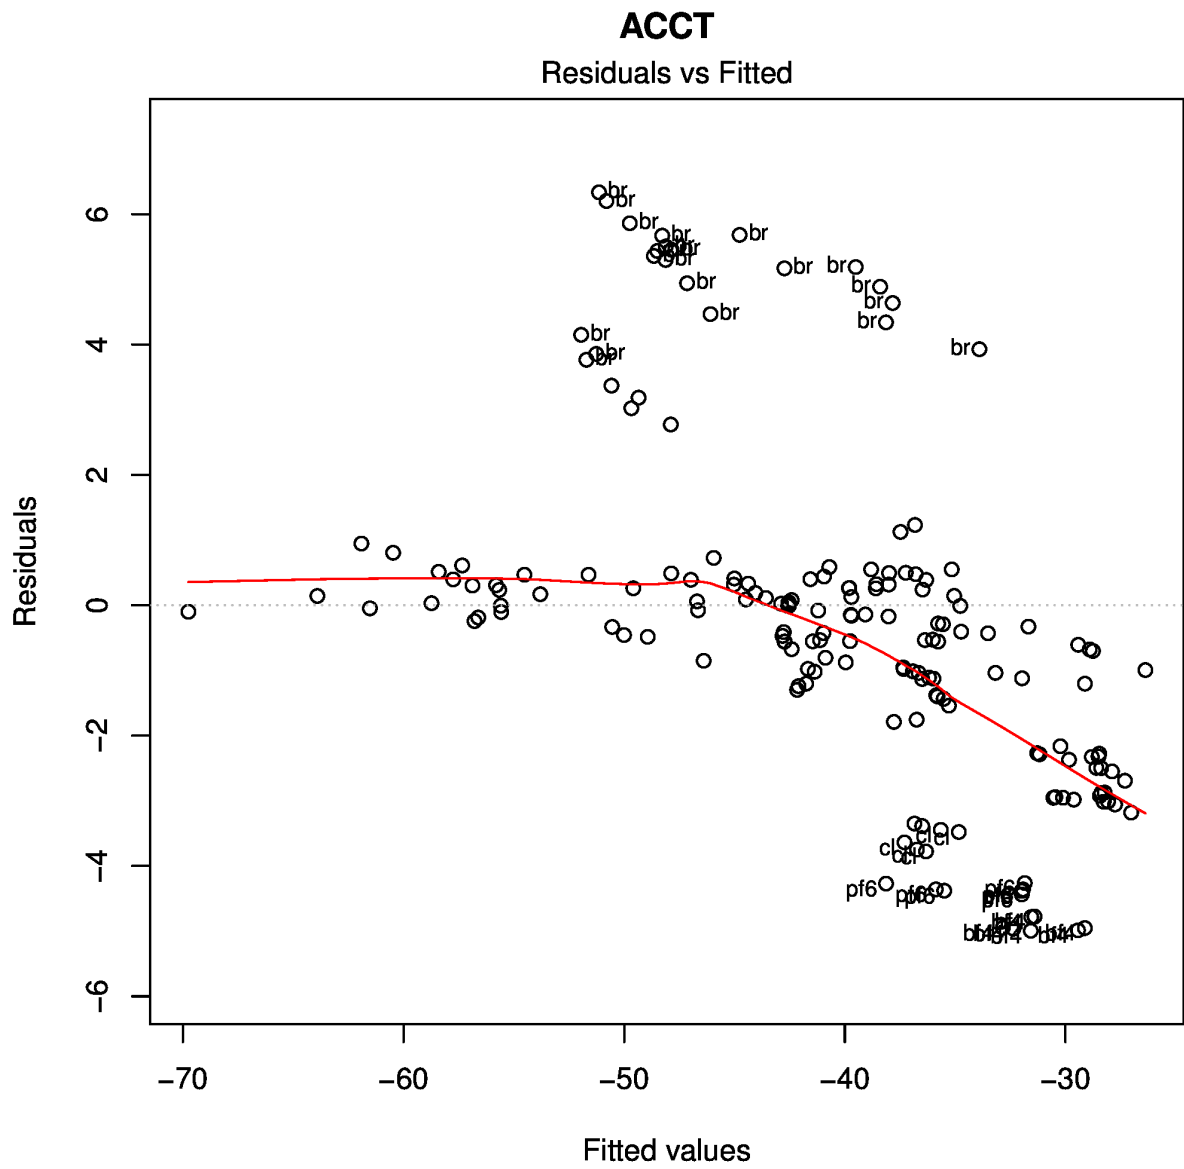

Figure S 41: Residuals vs Fitted values



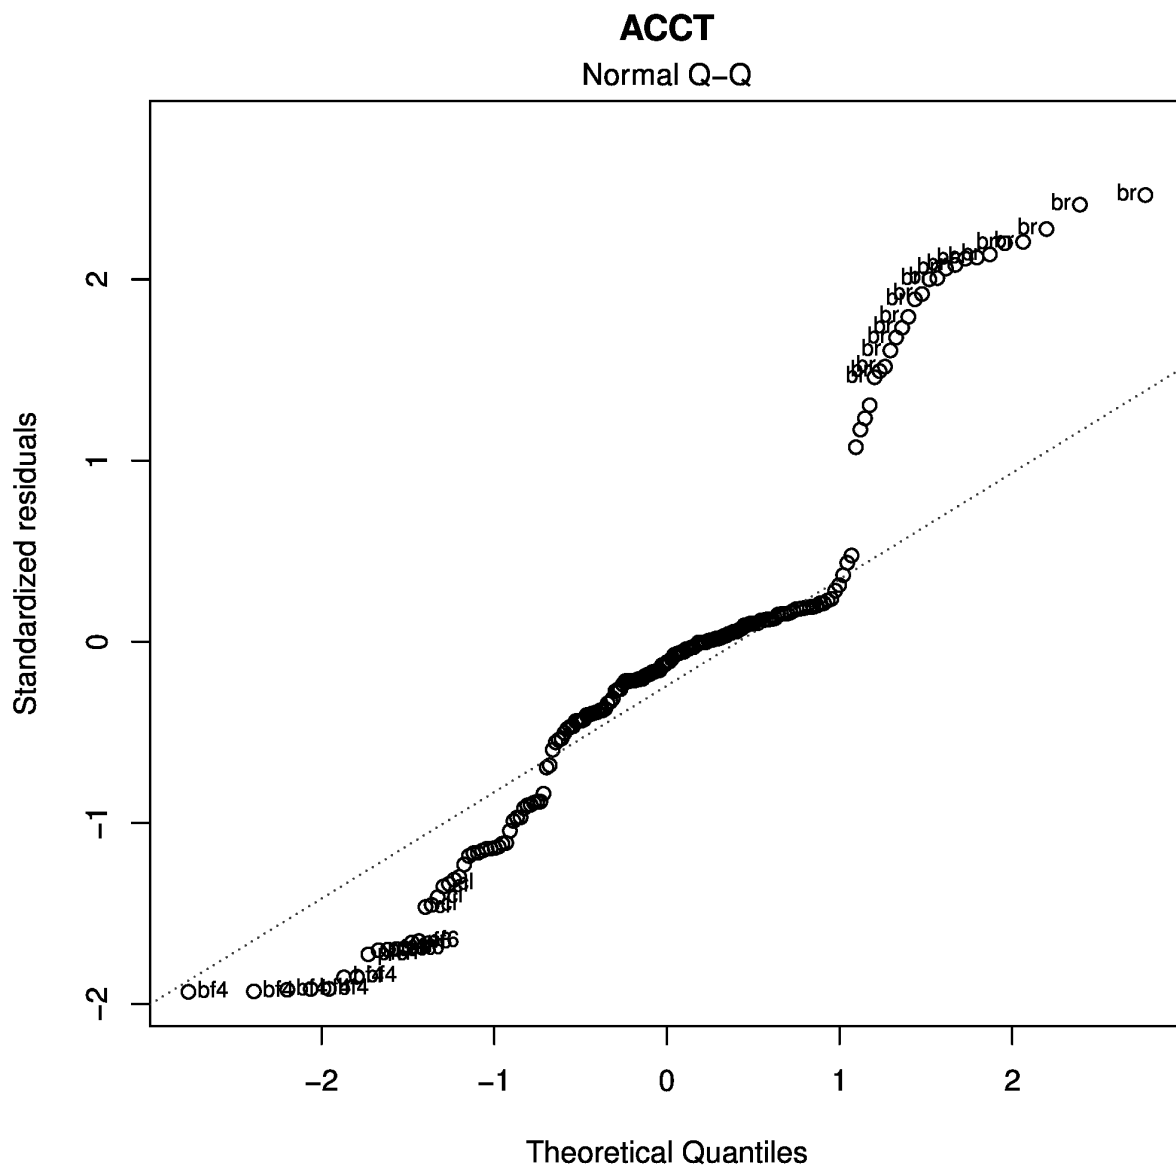

Figure S 42: Q-Q plot







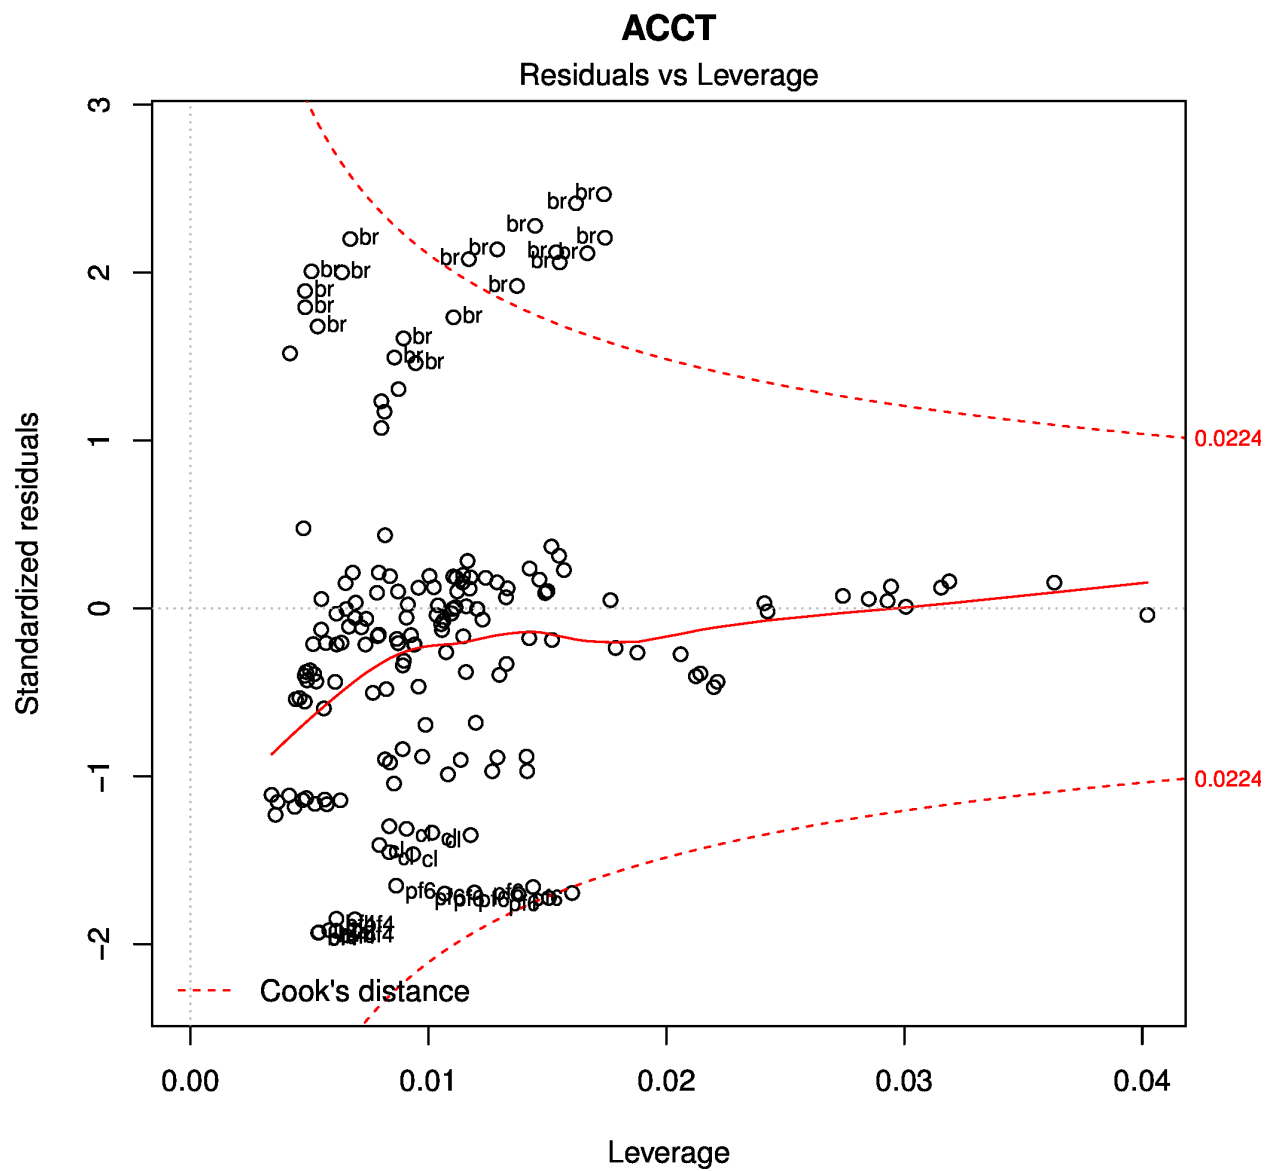

Figure S 44: Residuals vs Leverage plot



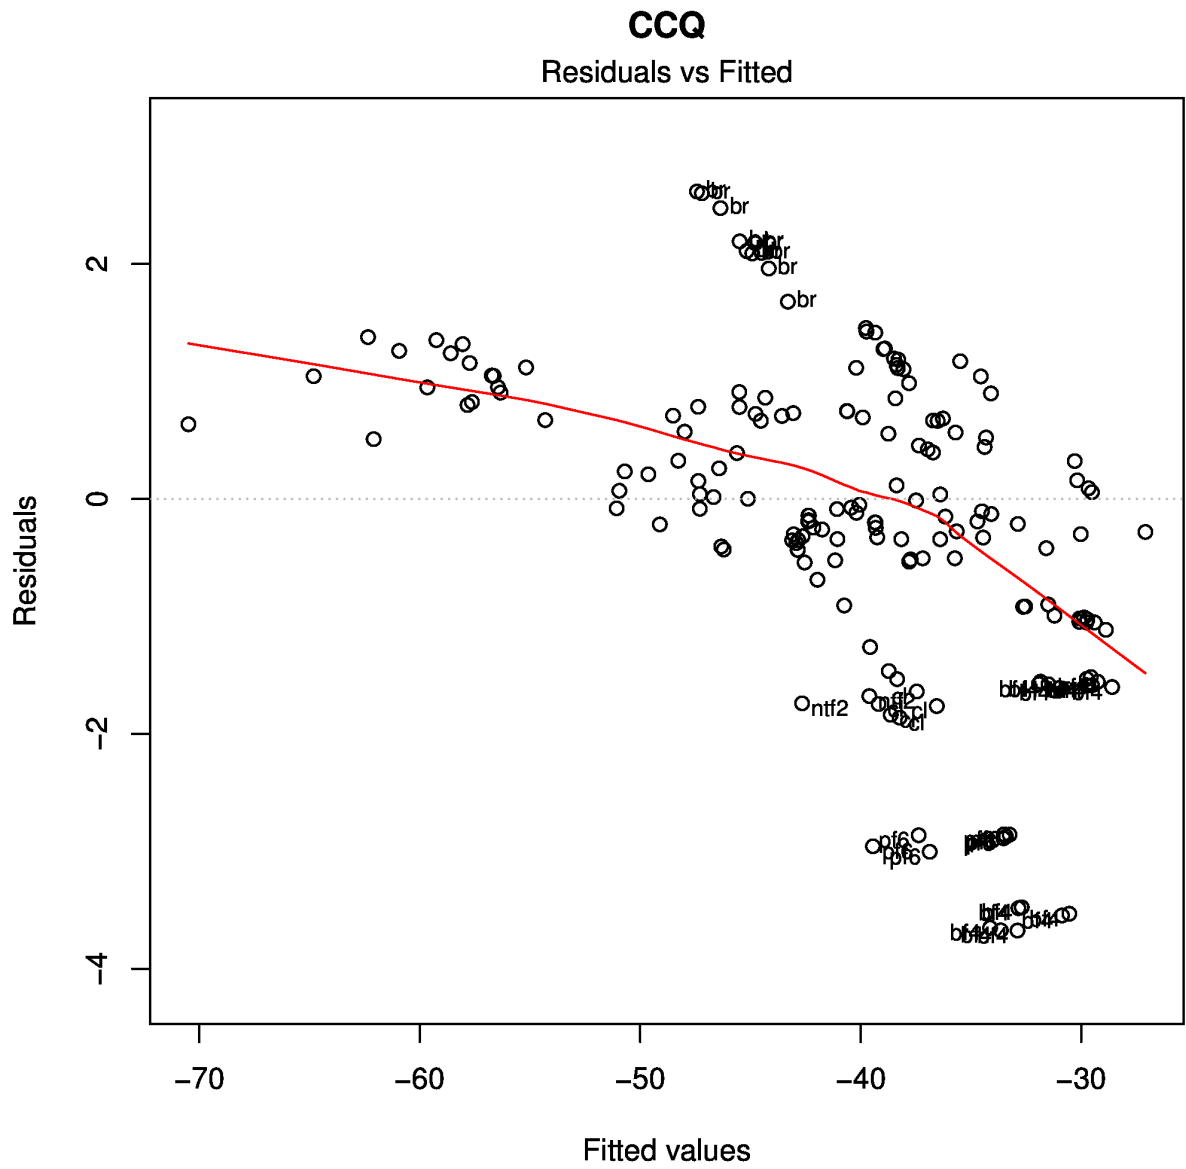

Figure S 45: Residuals vs Fitted values



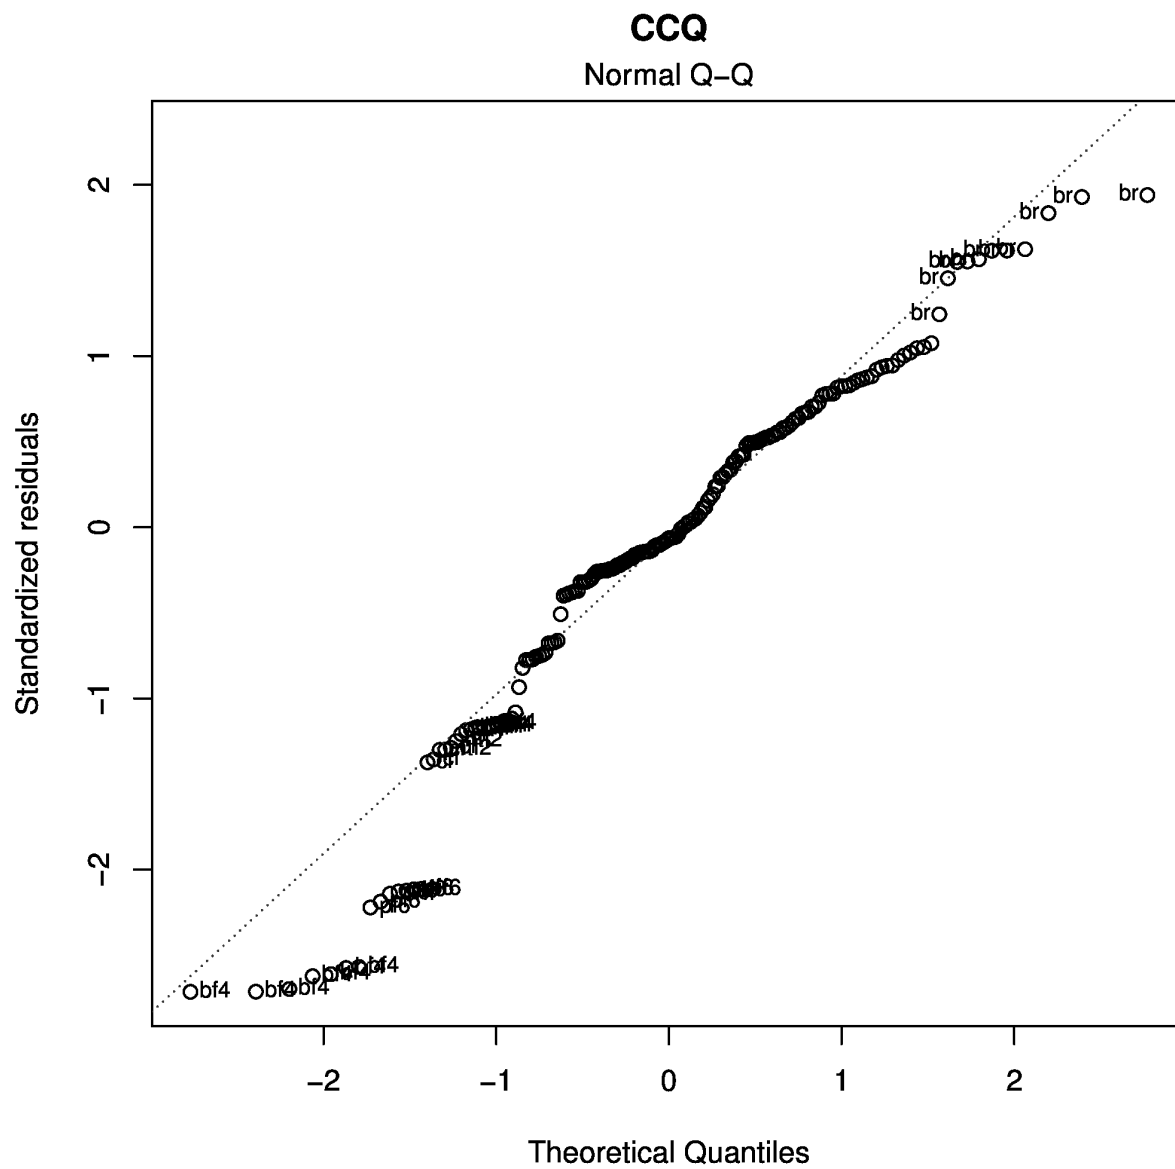

Figure S 46: Q-Q plot











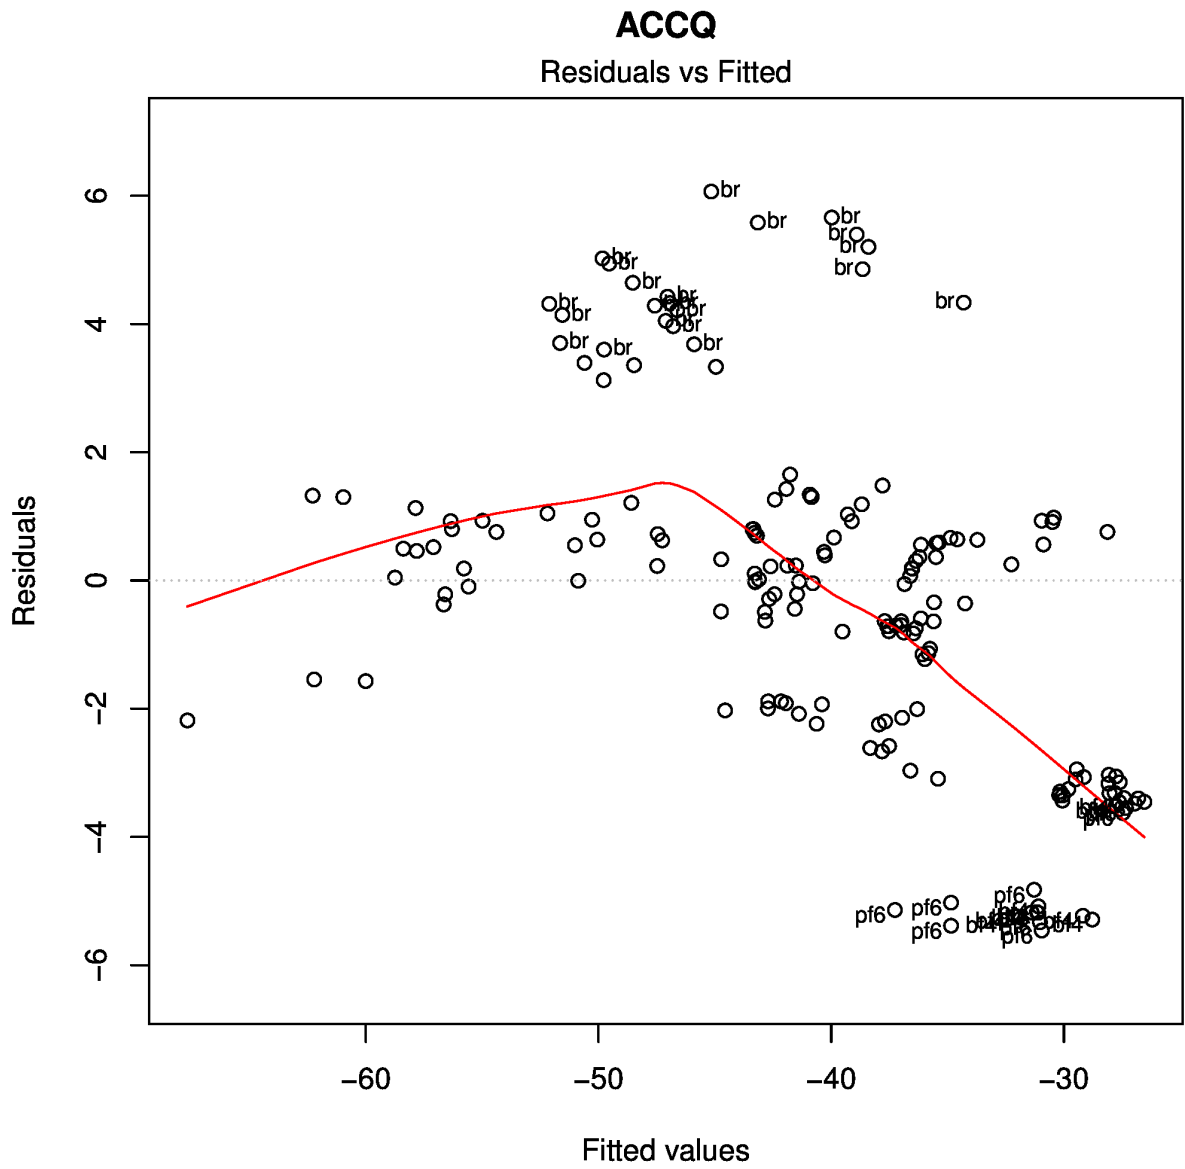

Figure S 49: Residuals vs Fitted values



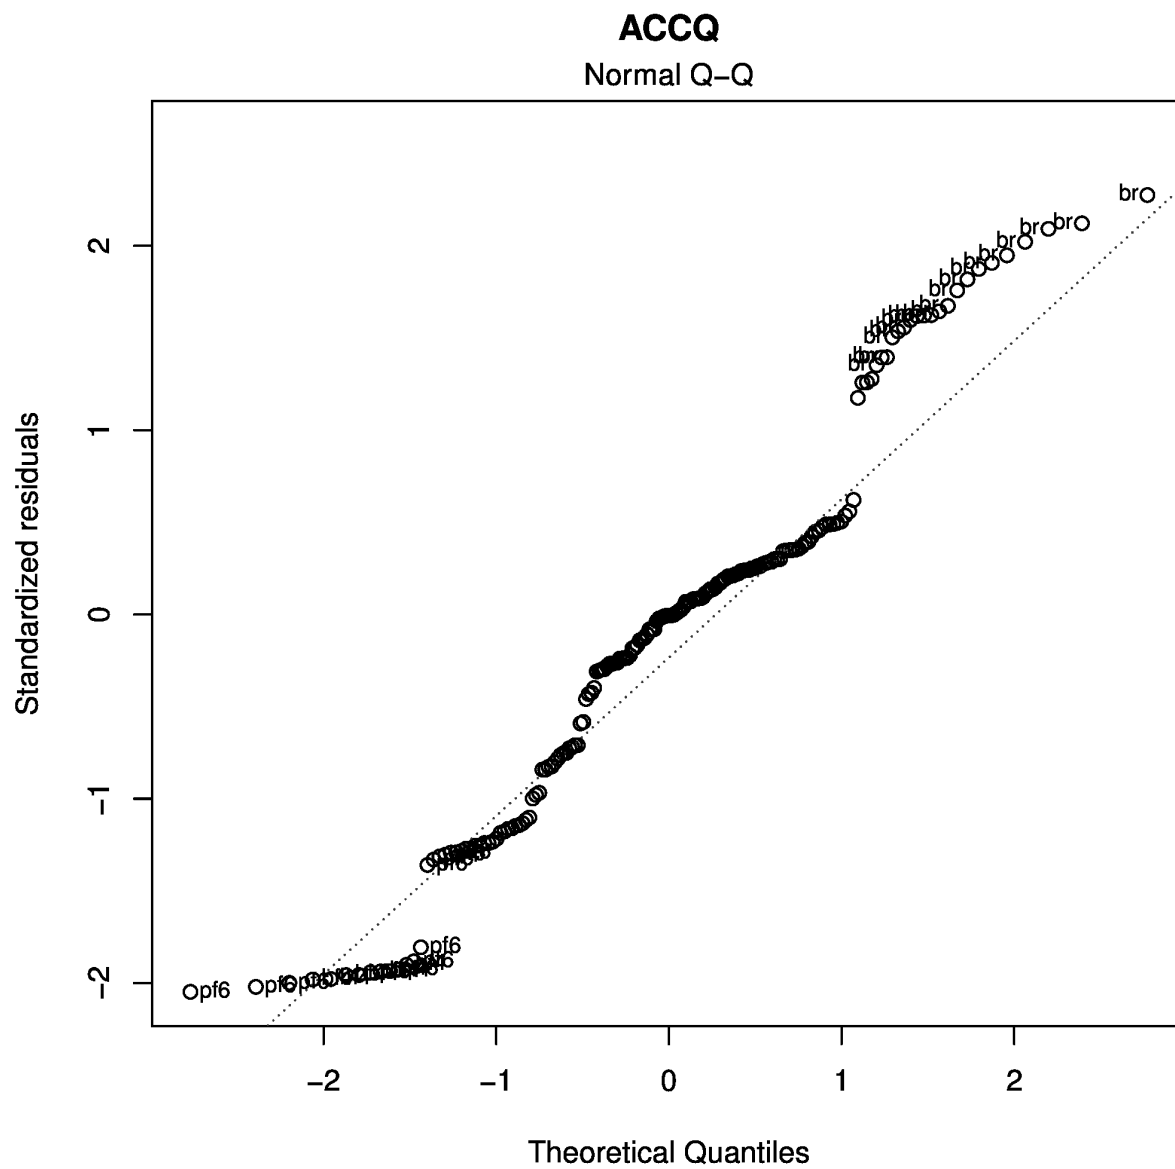

Figure S 50: Q-Q plot



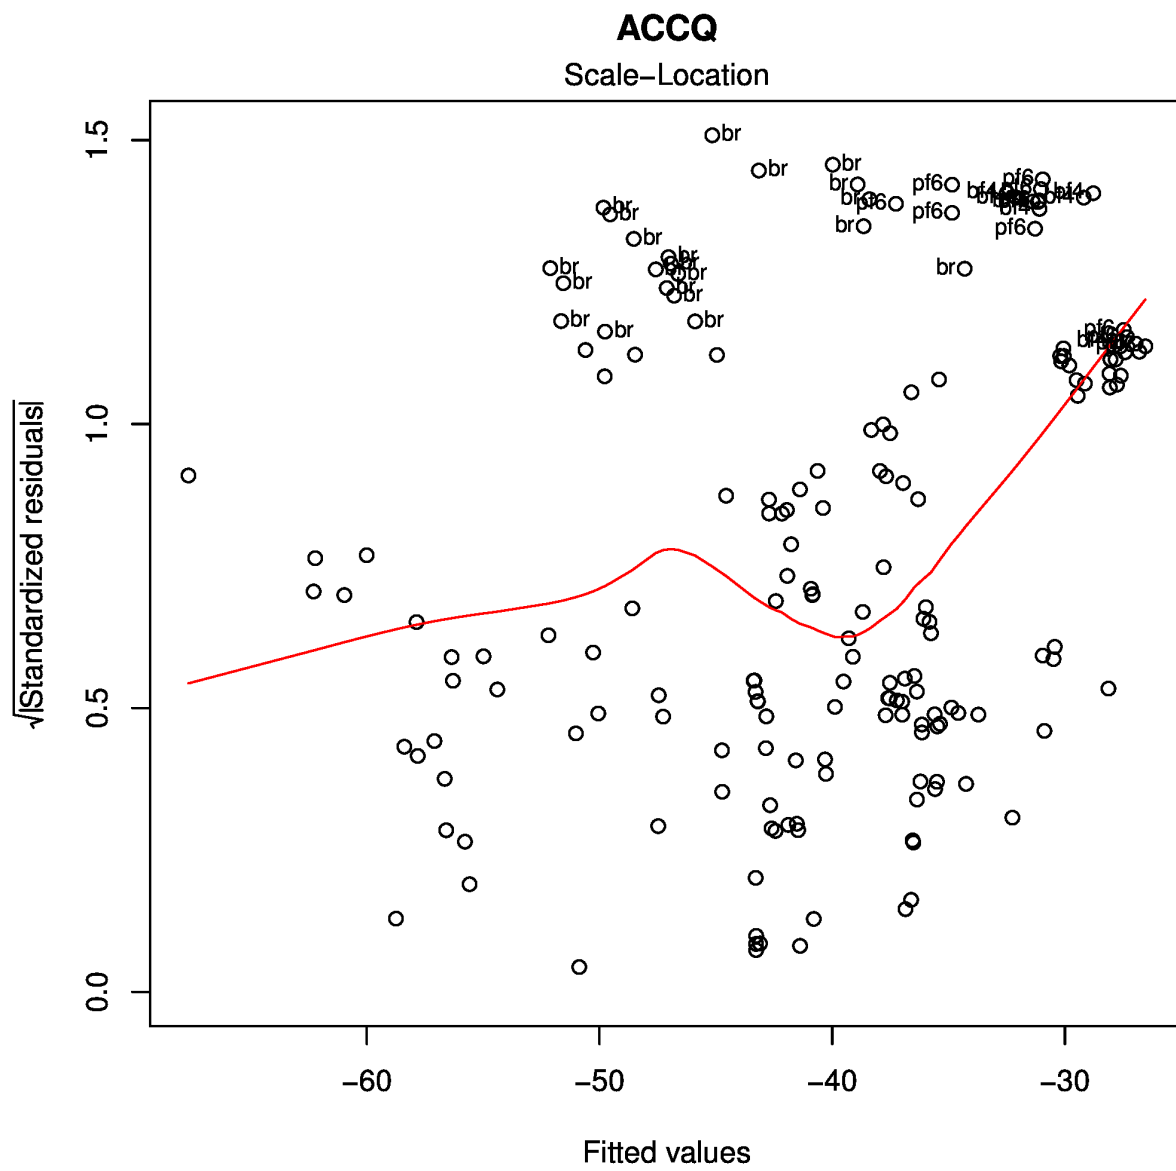

Figure S 51: Scale-Location plot



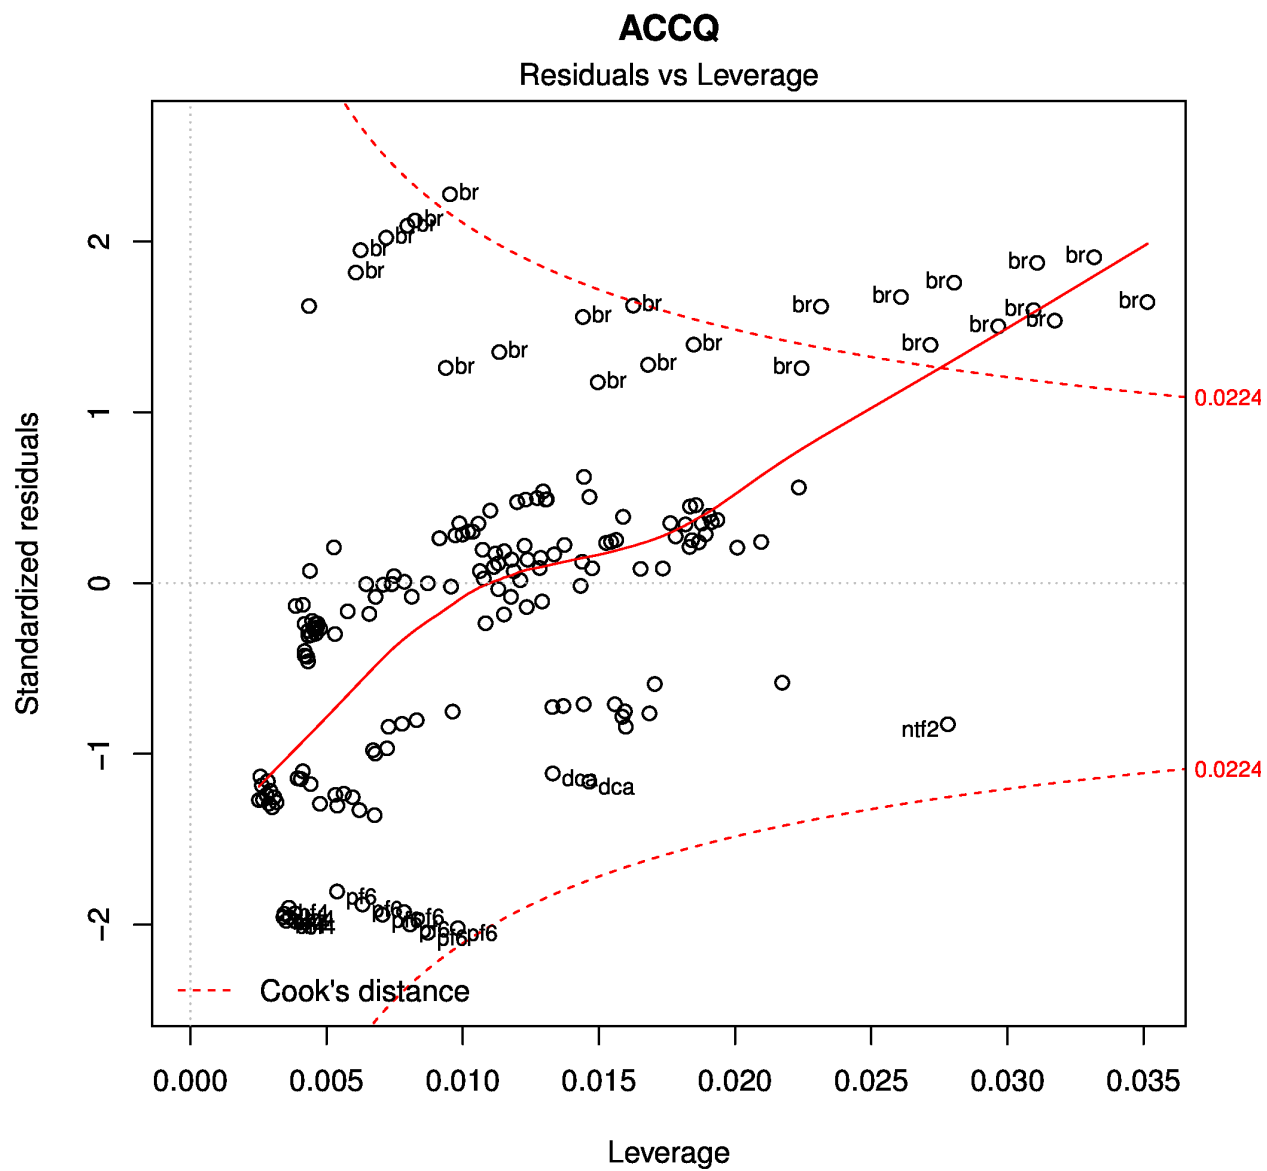

Figure S 52: Residuals vs Leverage plot



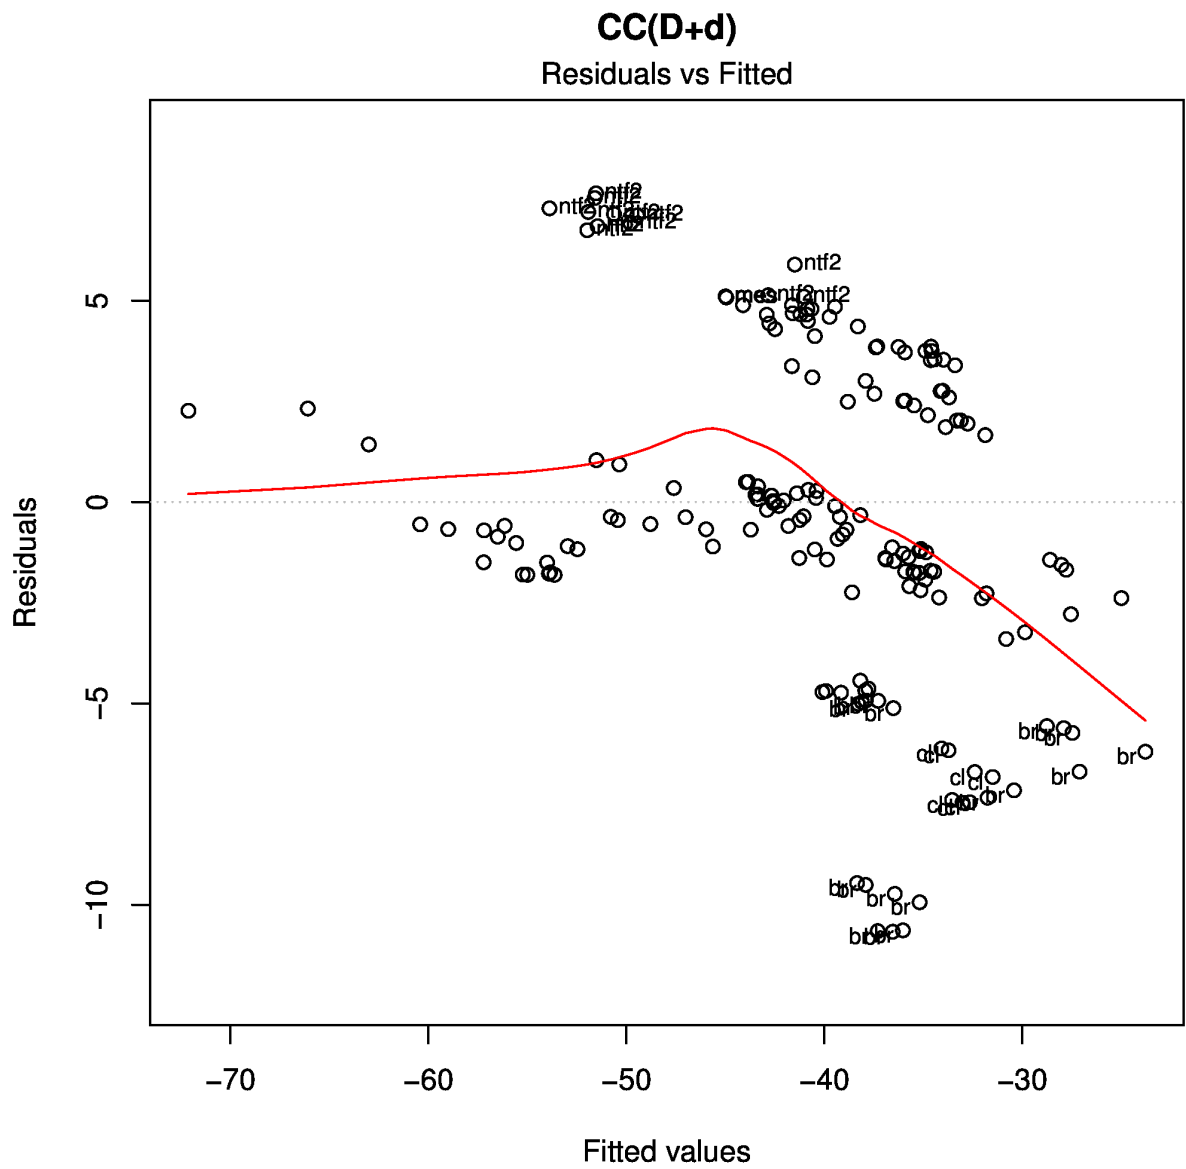

Figure S 53: Residuals vs Fitted values



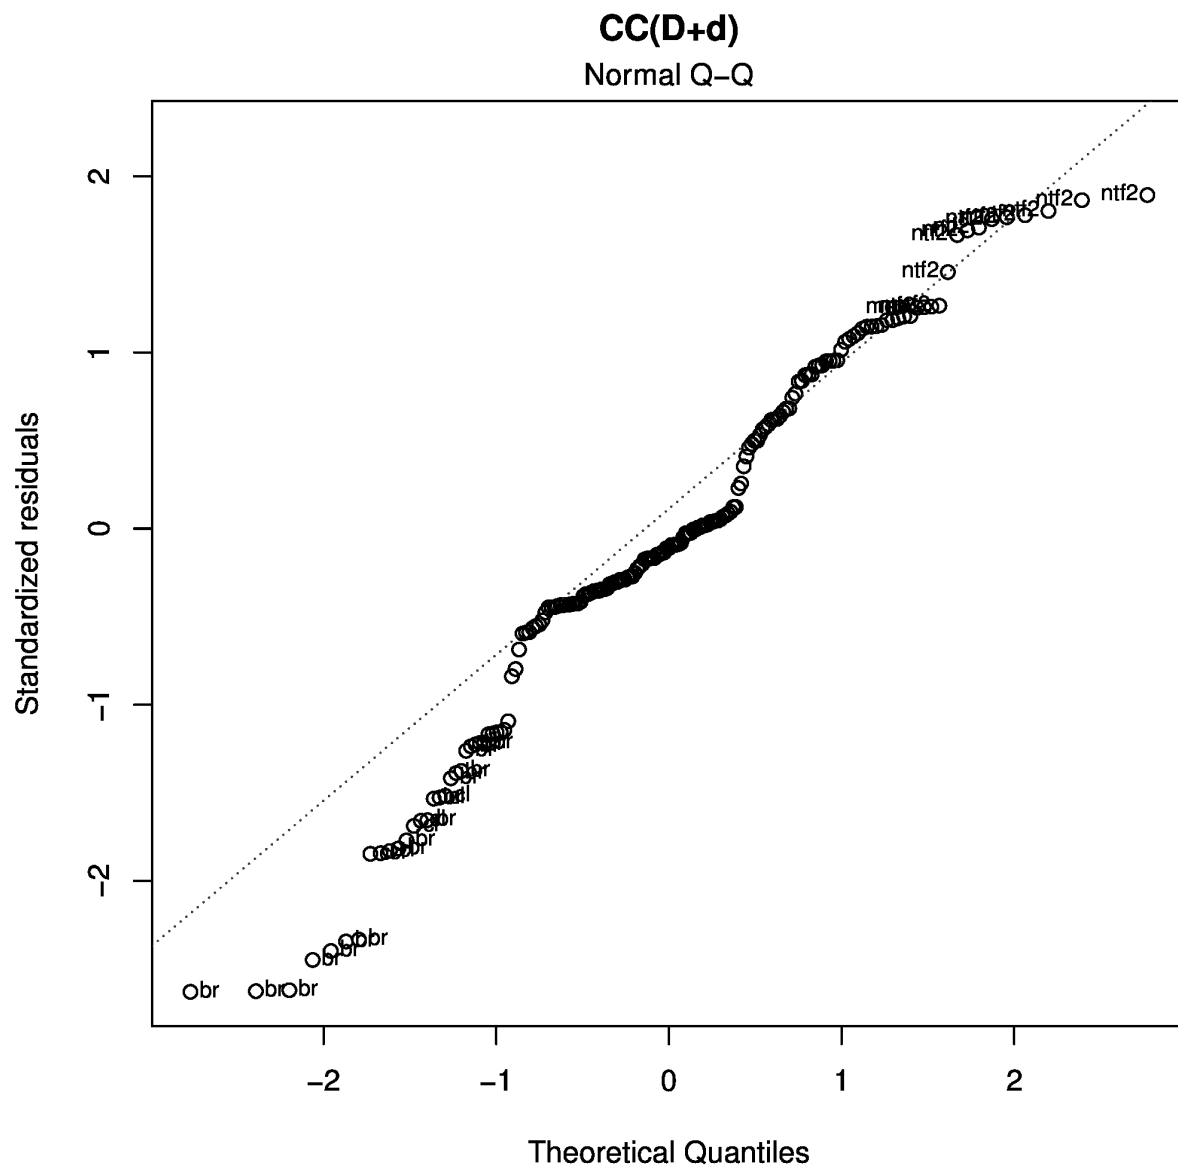

Figure S 54: Q-Q plot



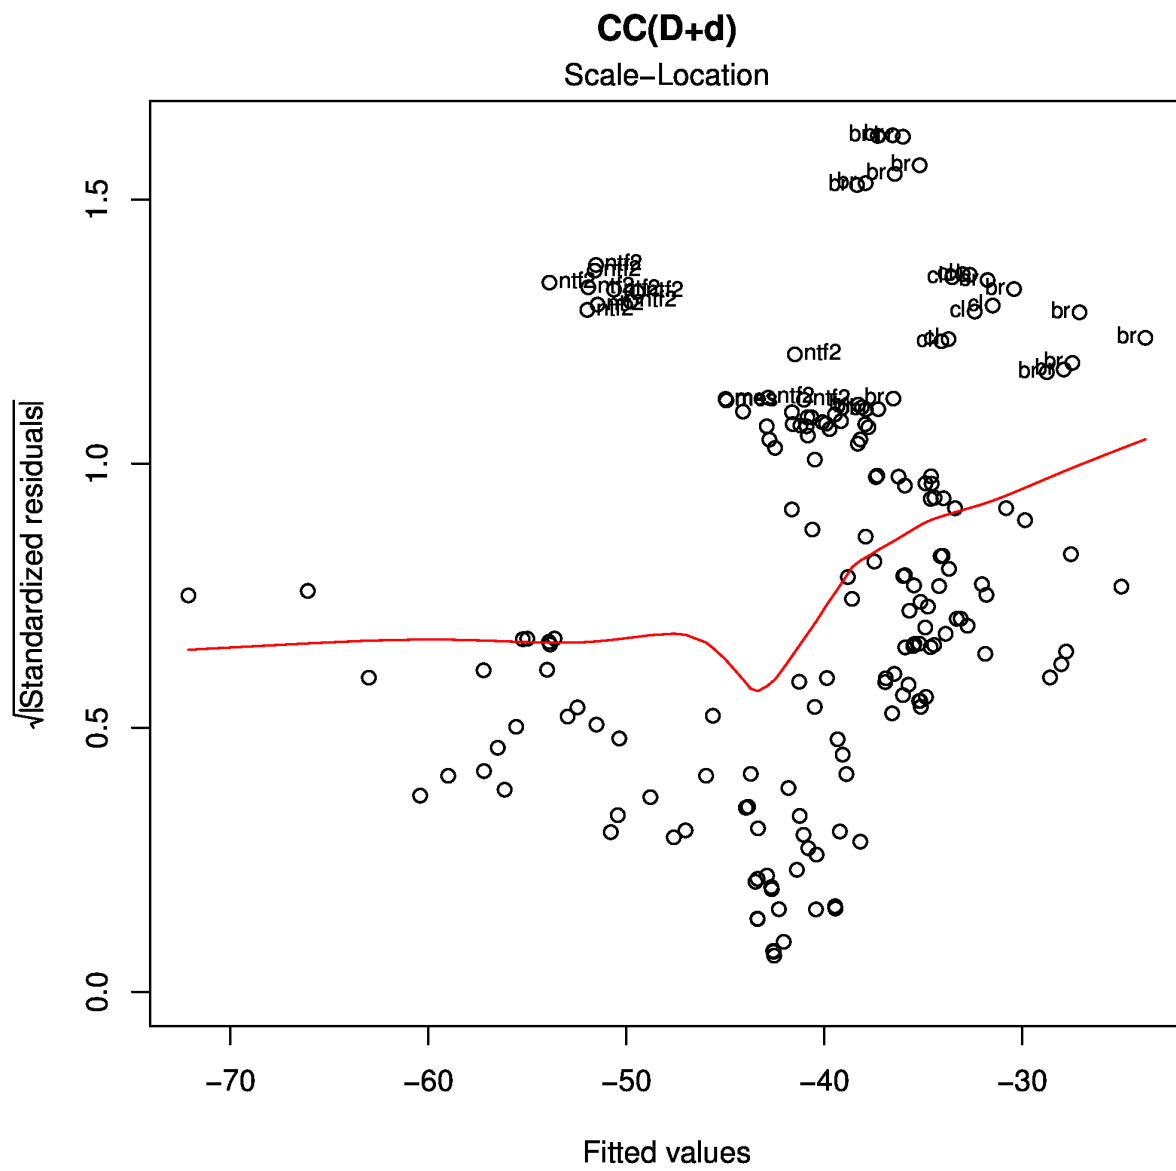

Figure S 55: Scale-Location plot



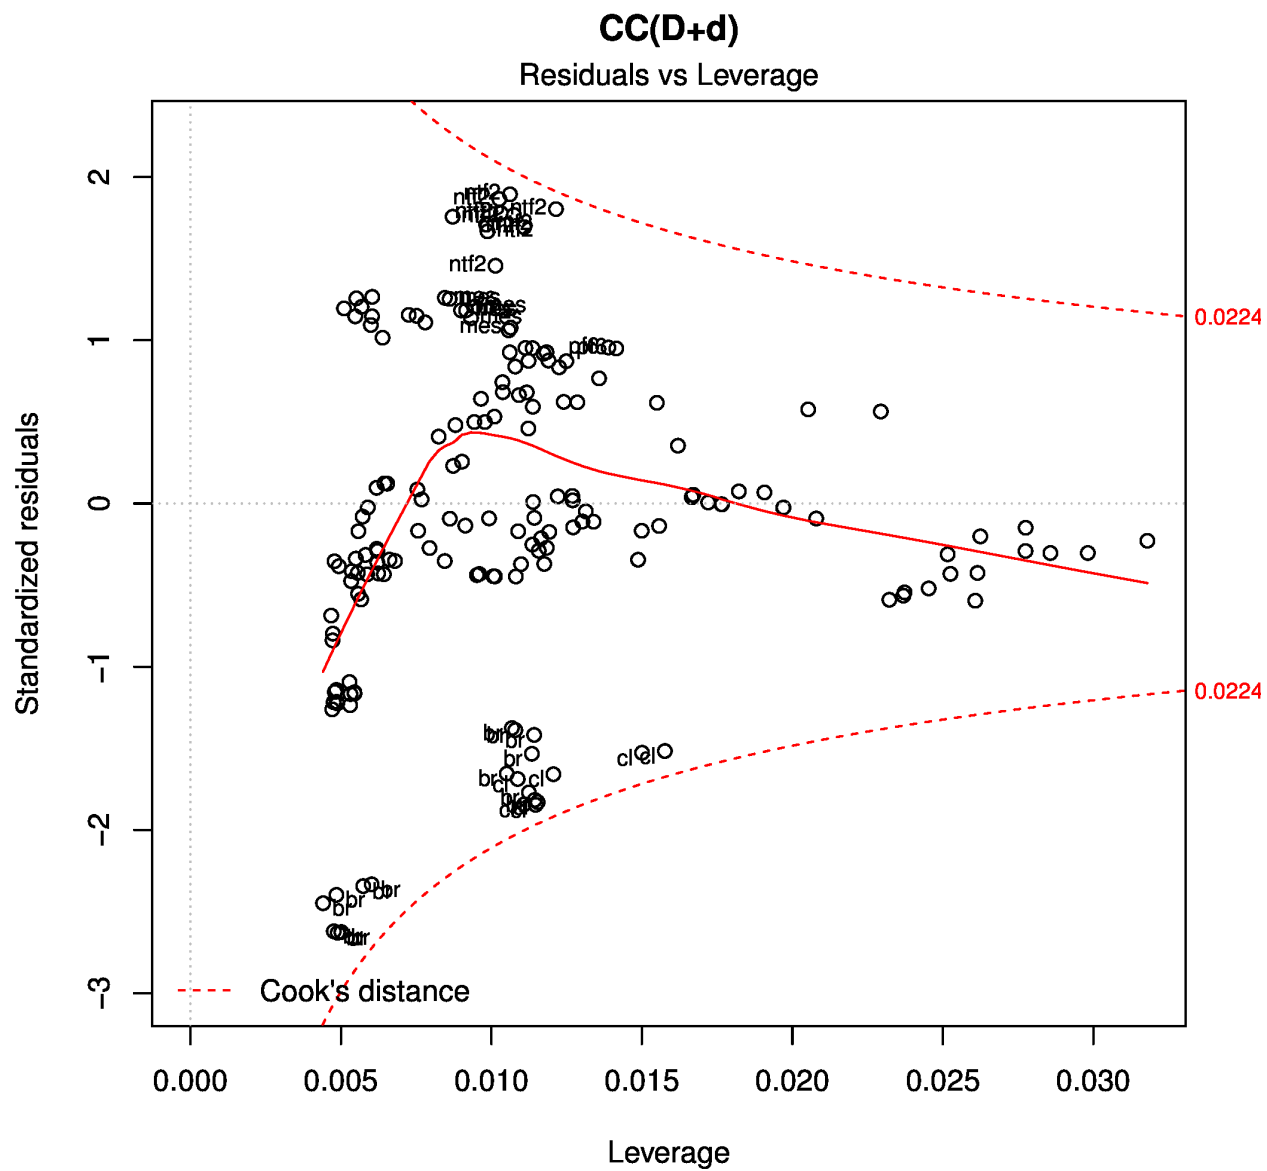

Figure S 56: Residuals vs Leverage plot



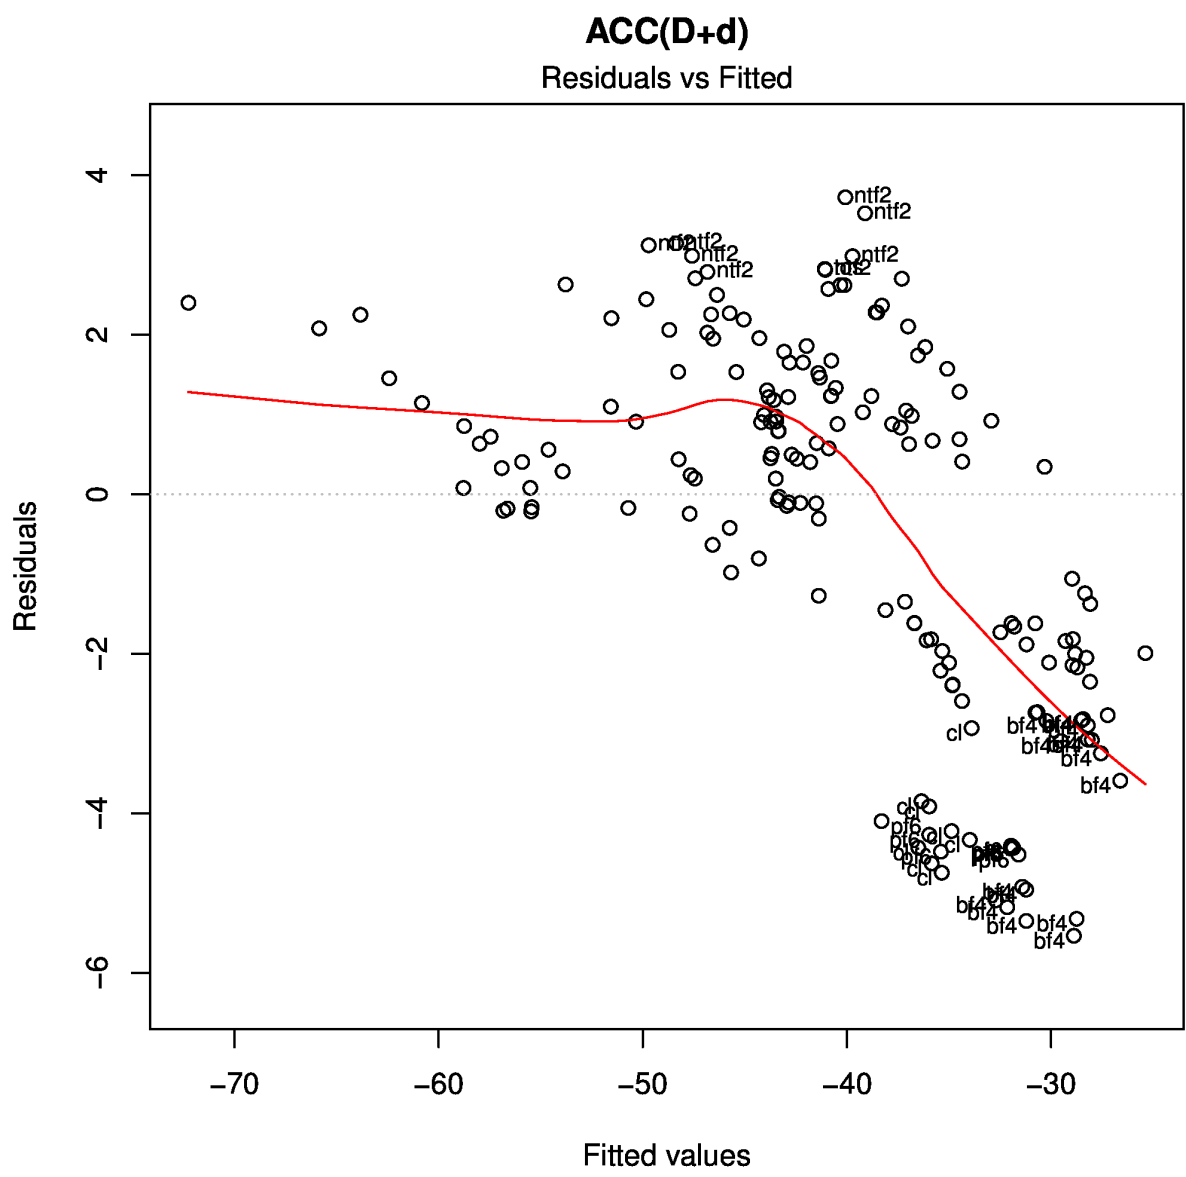

Figure S 57: Residuals vs Fitted values



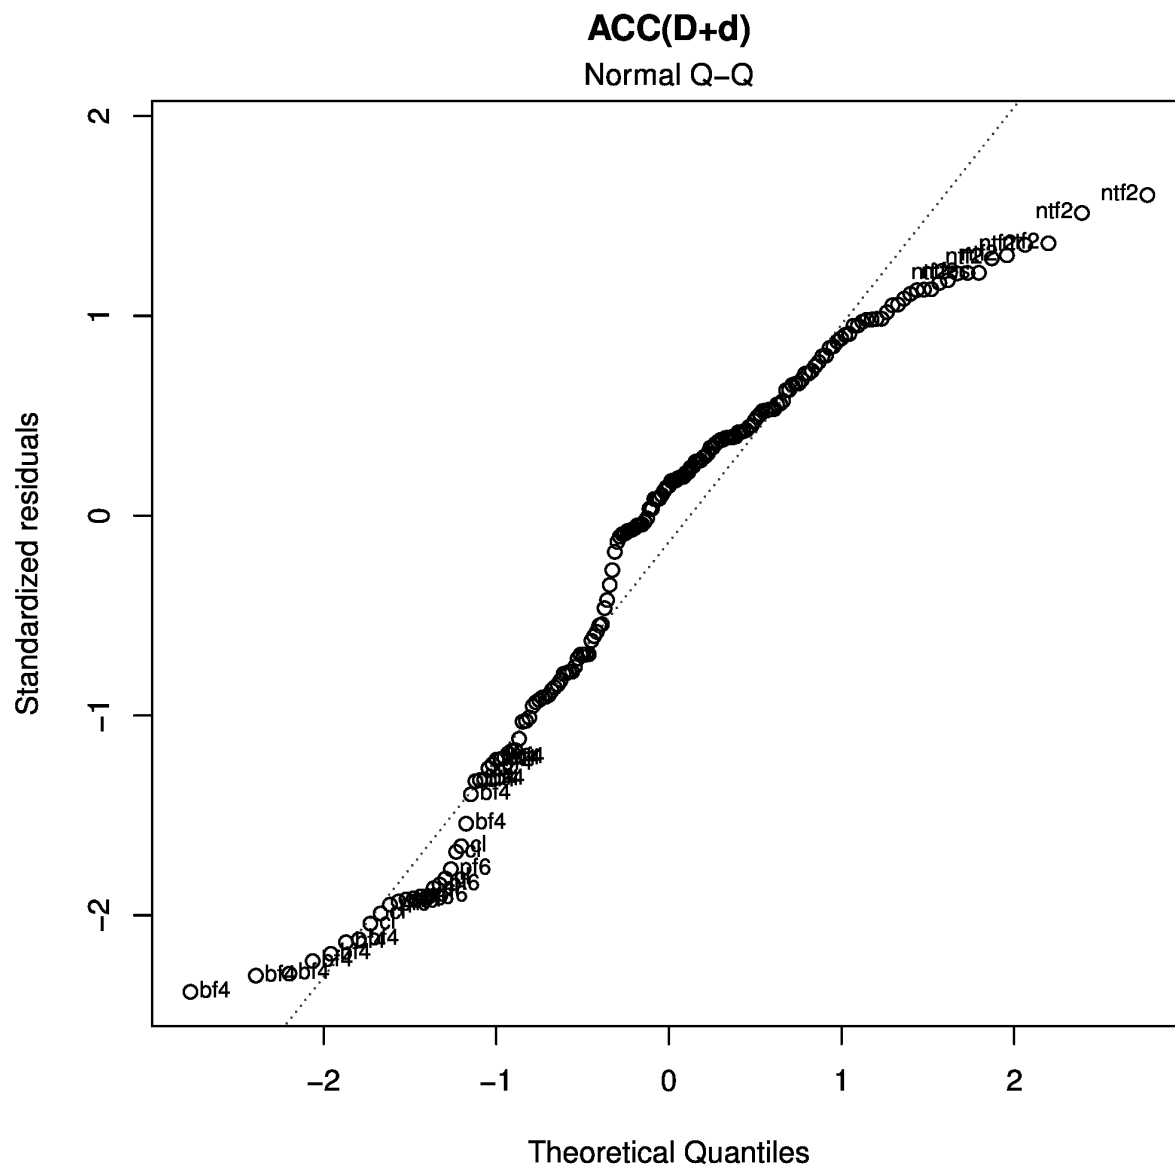

Figure S 58: Q-Q plot



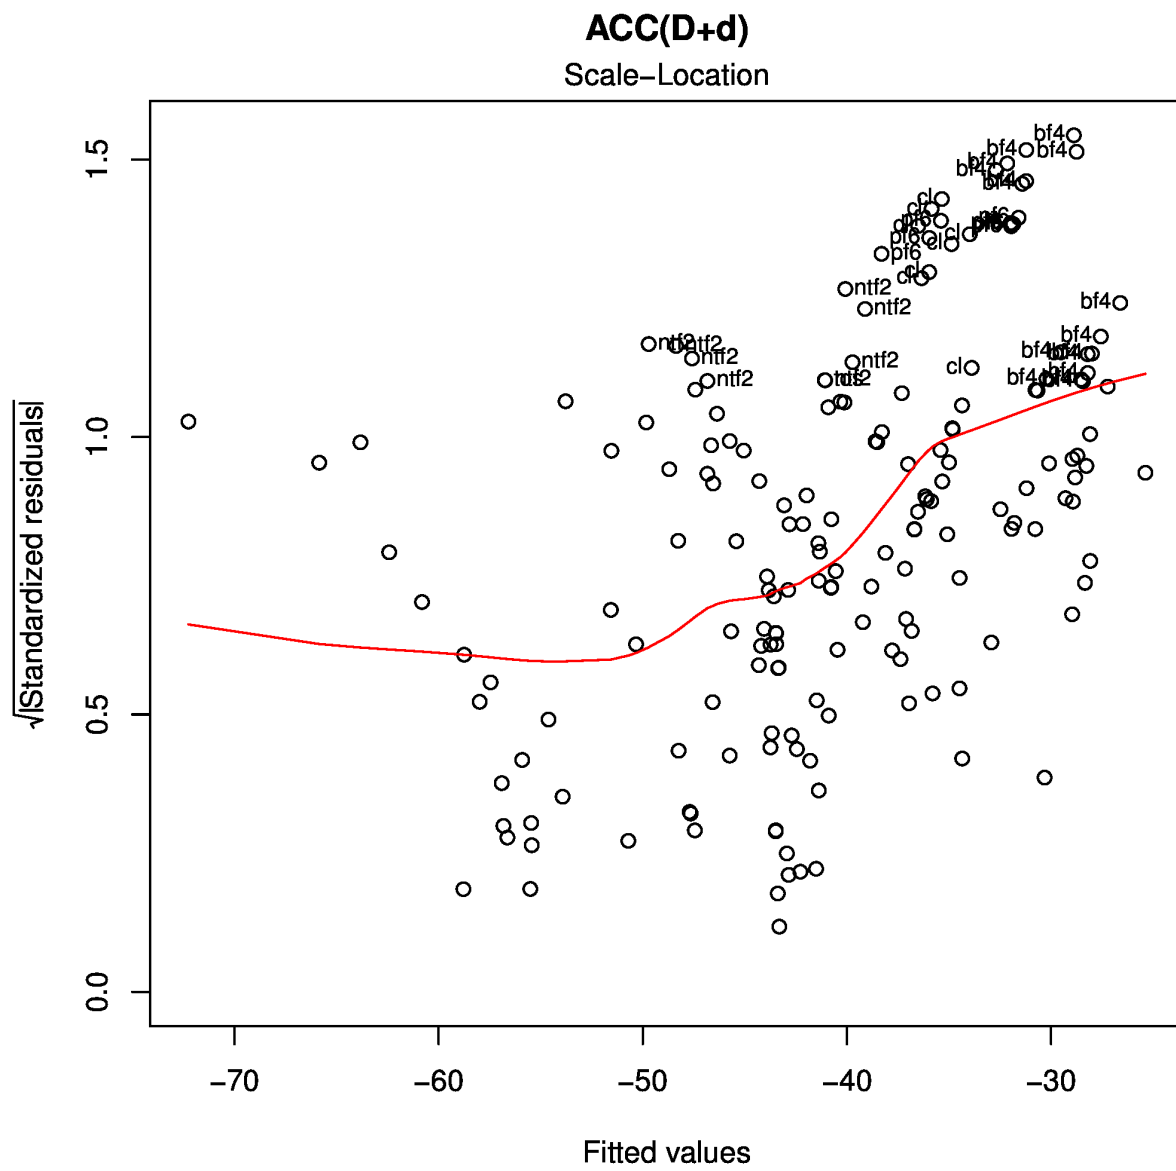

Figure S 59: Scale-Location plot



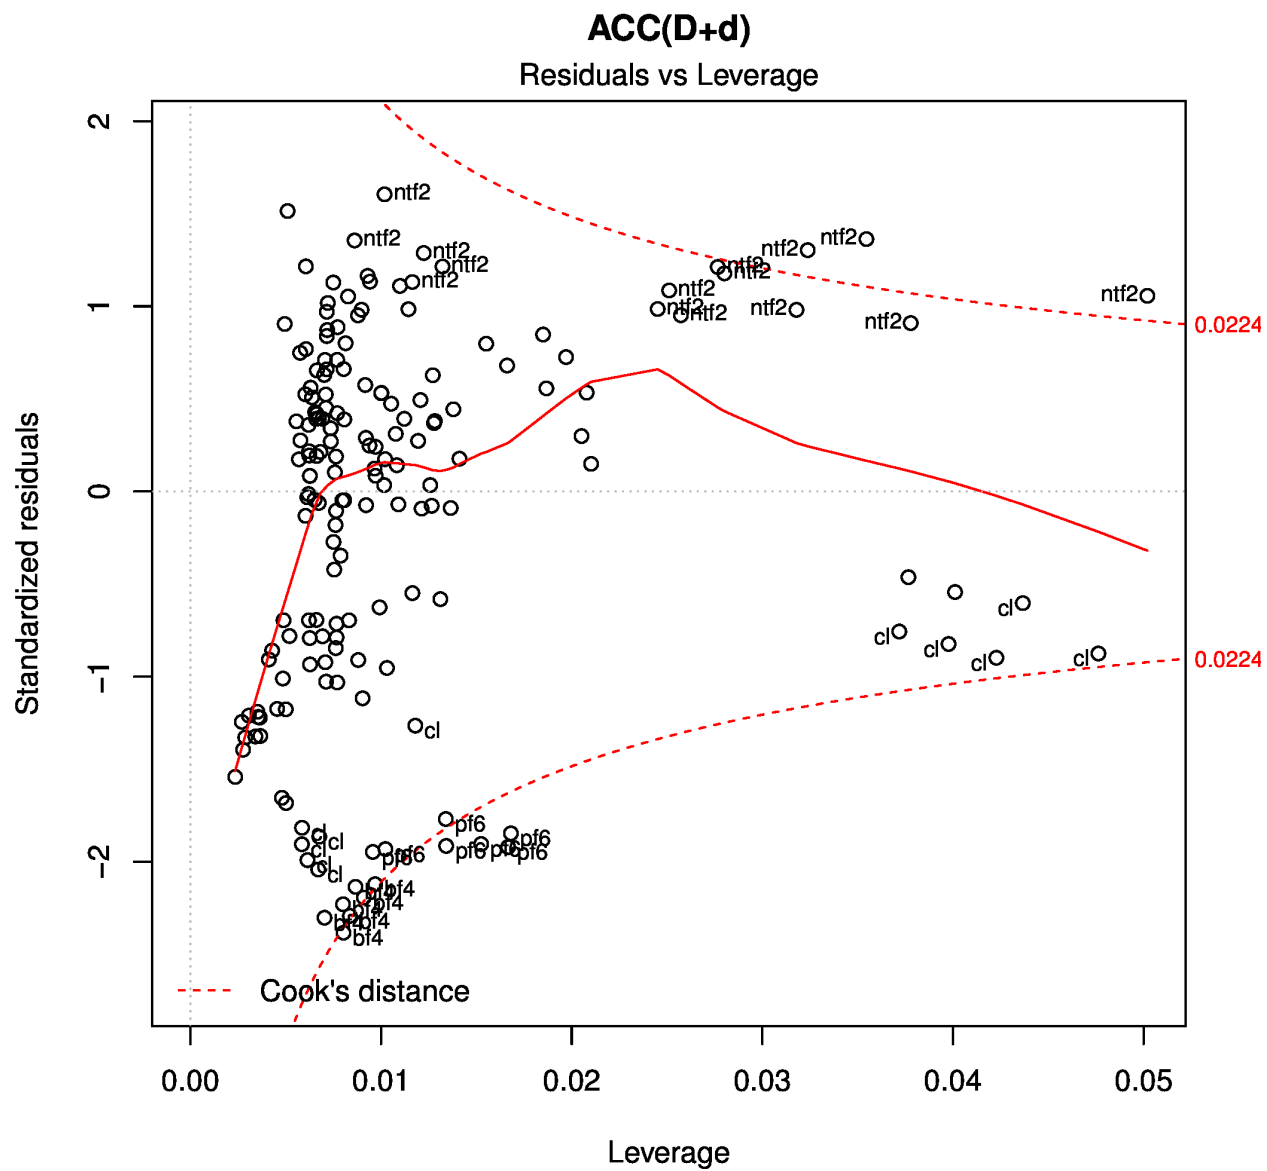

Figure S 60: Residuals vs Leverage plot



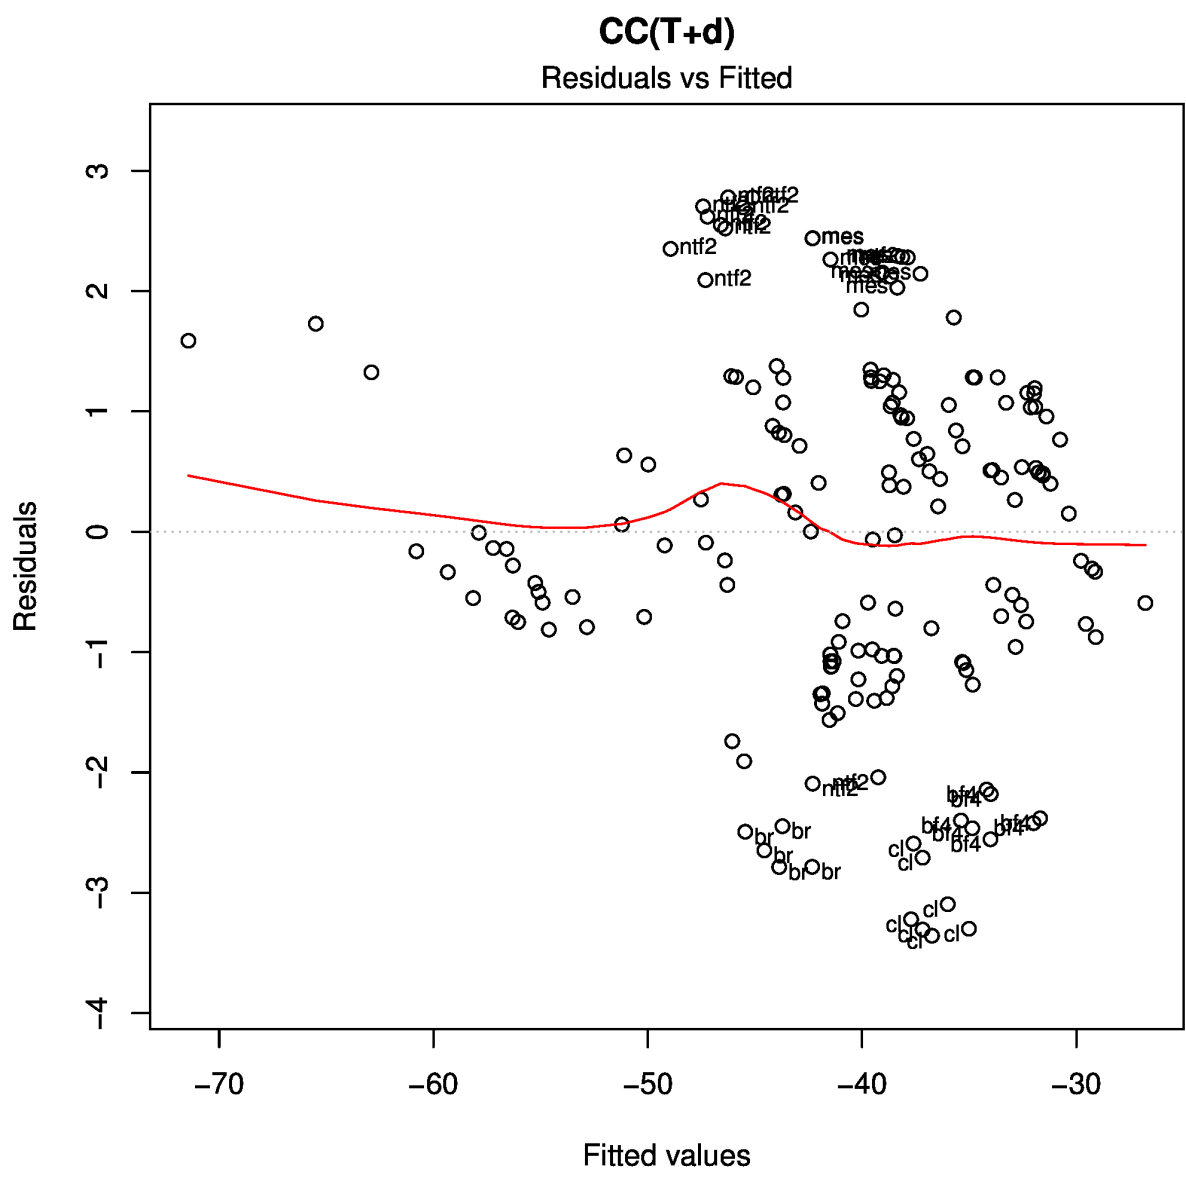

Figure S 61: Residuals vs Fitted values



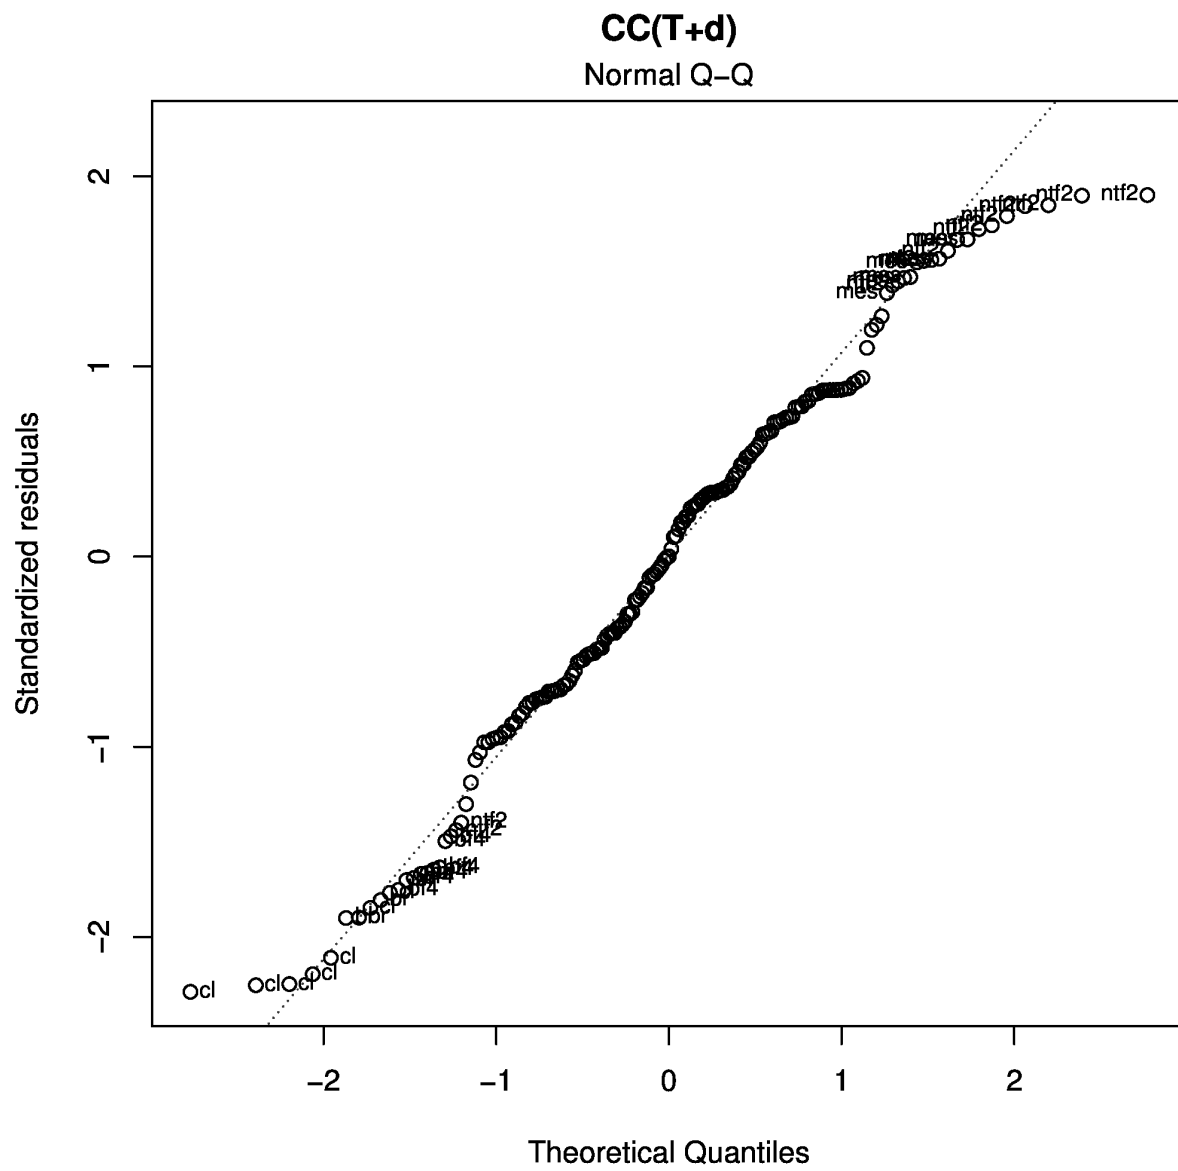

Figure S 62: Q-Q plot



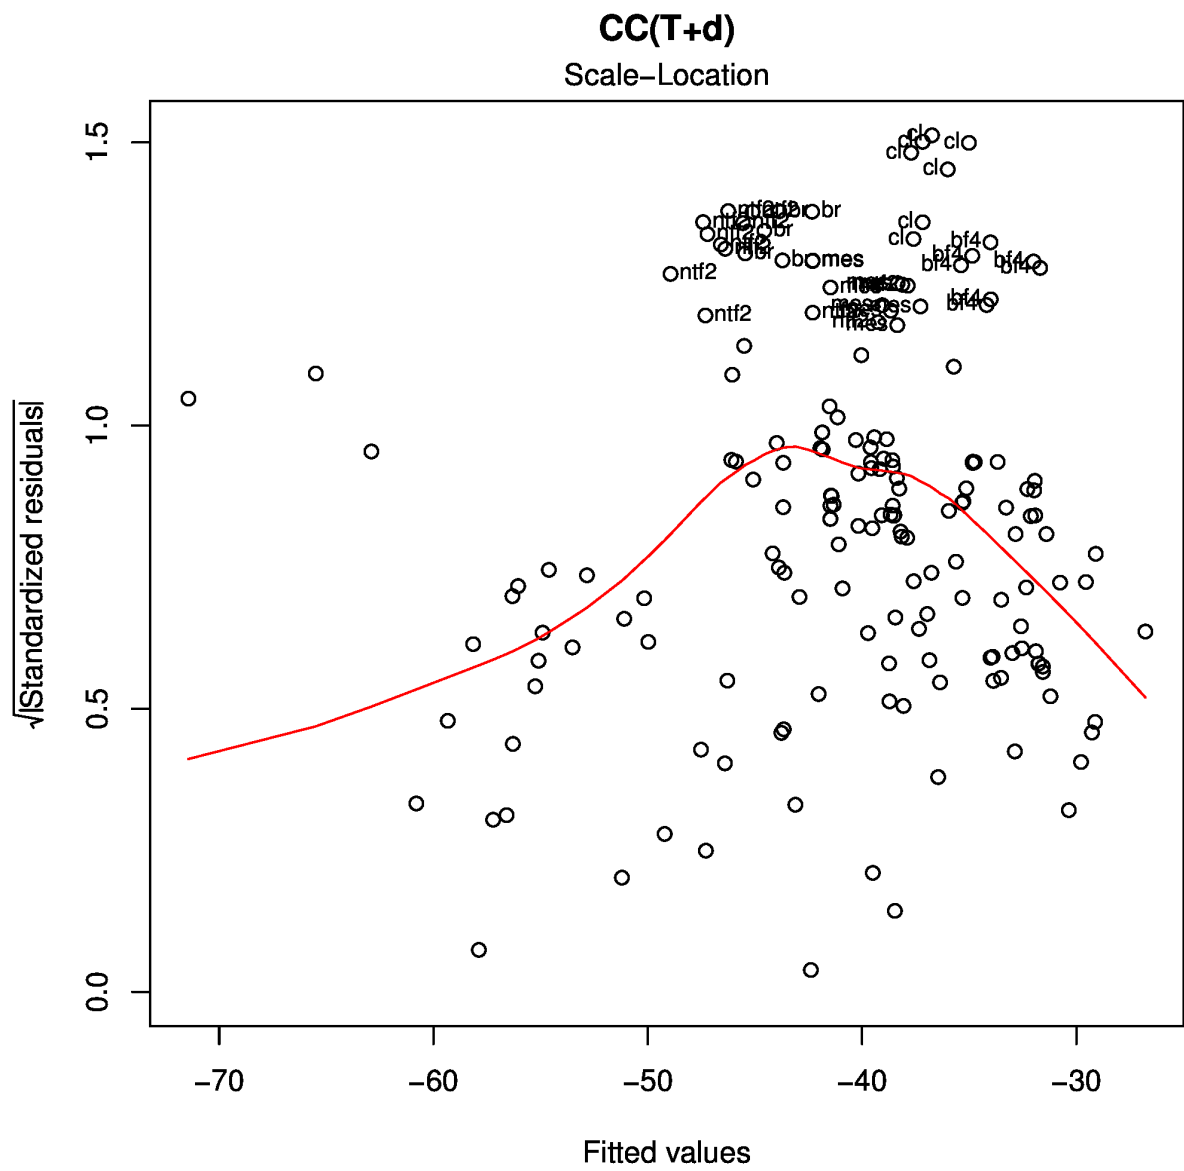

Figure S 63: Scale-Location plot







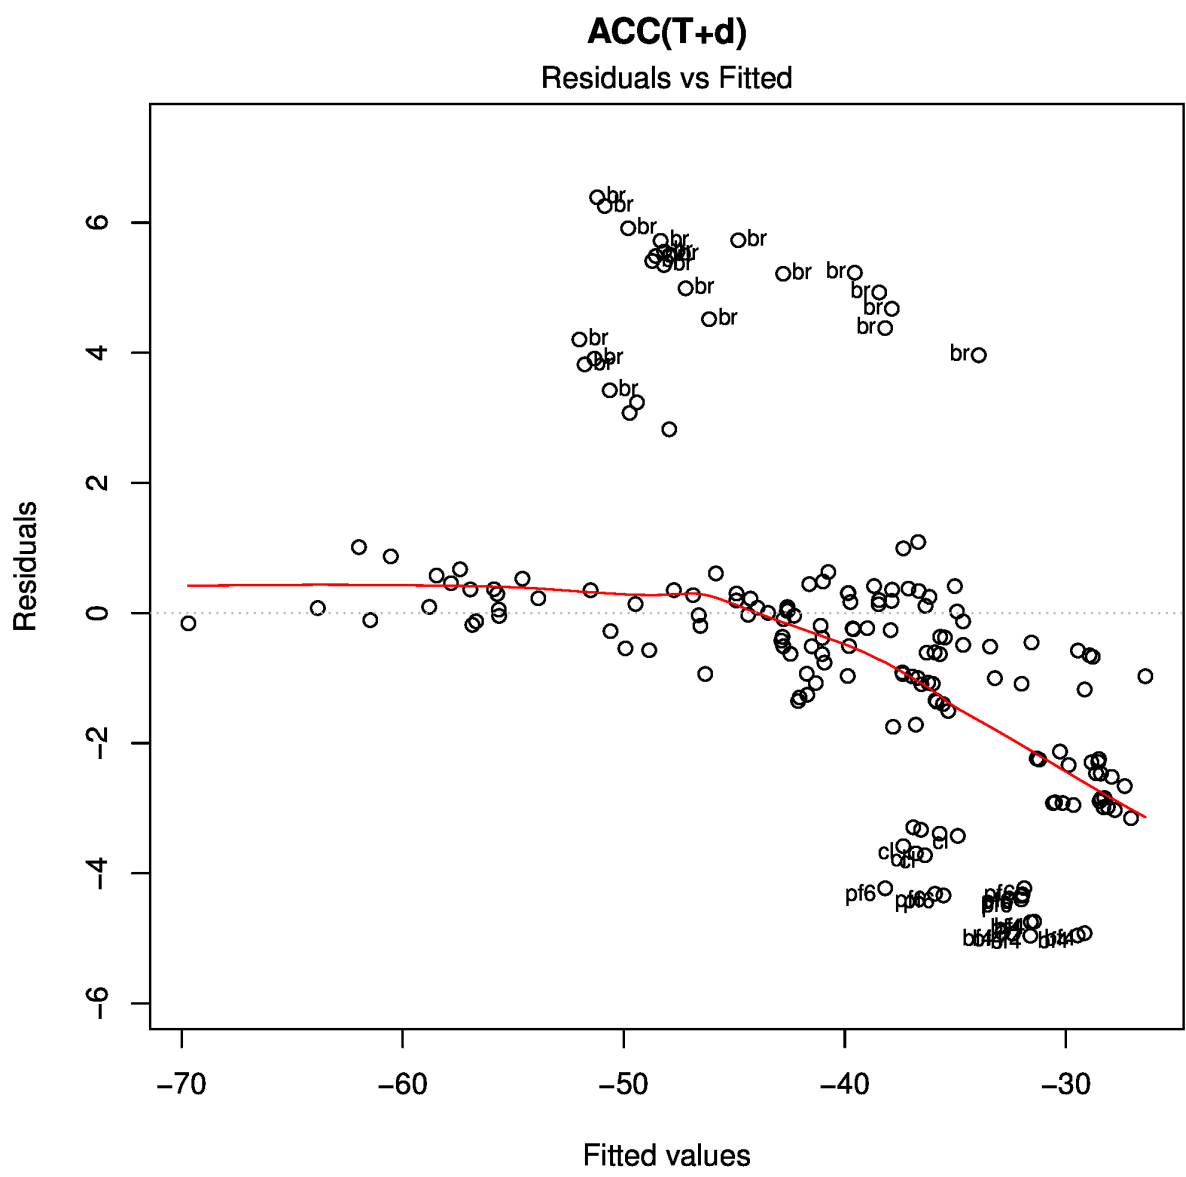

Figure S 65: Residuals vs Fitted values



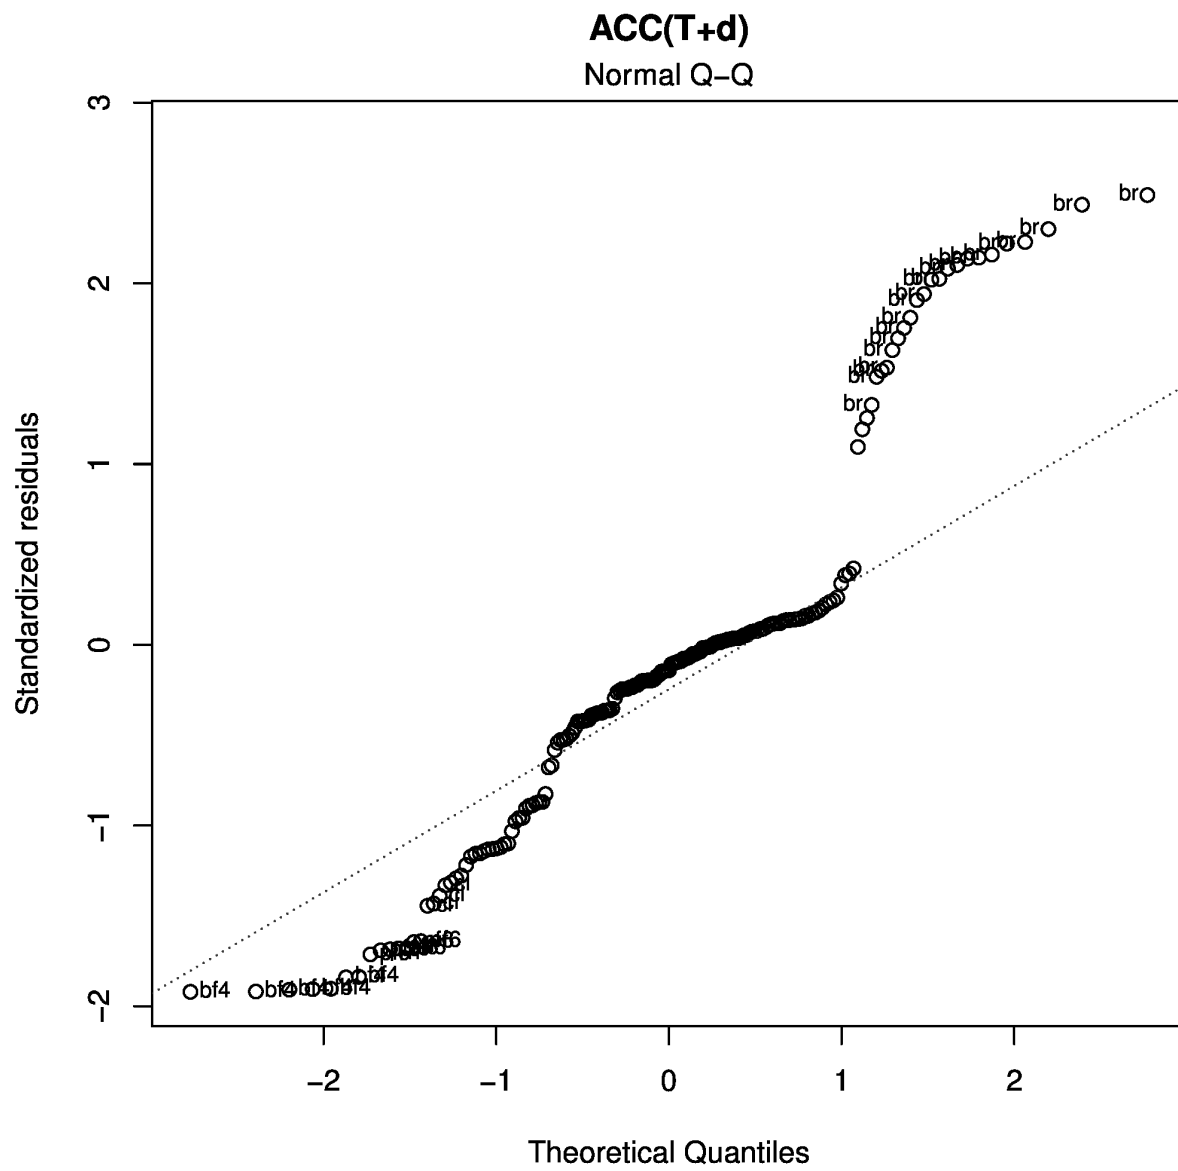

Figure S 66: Q-Q plot







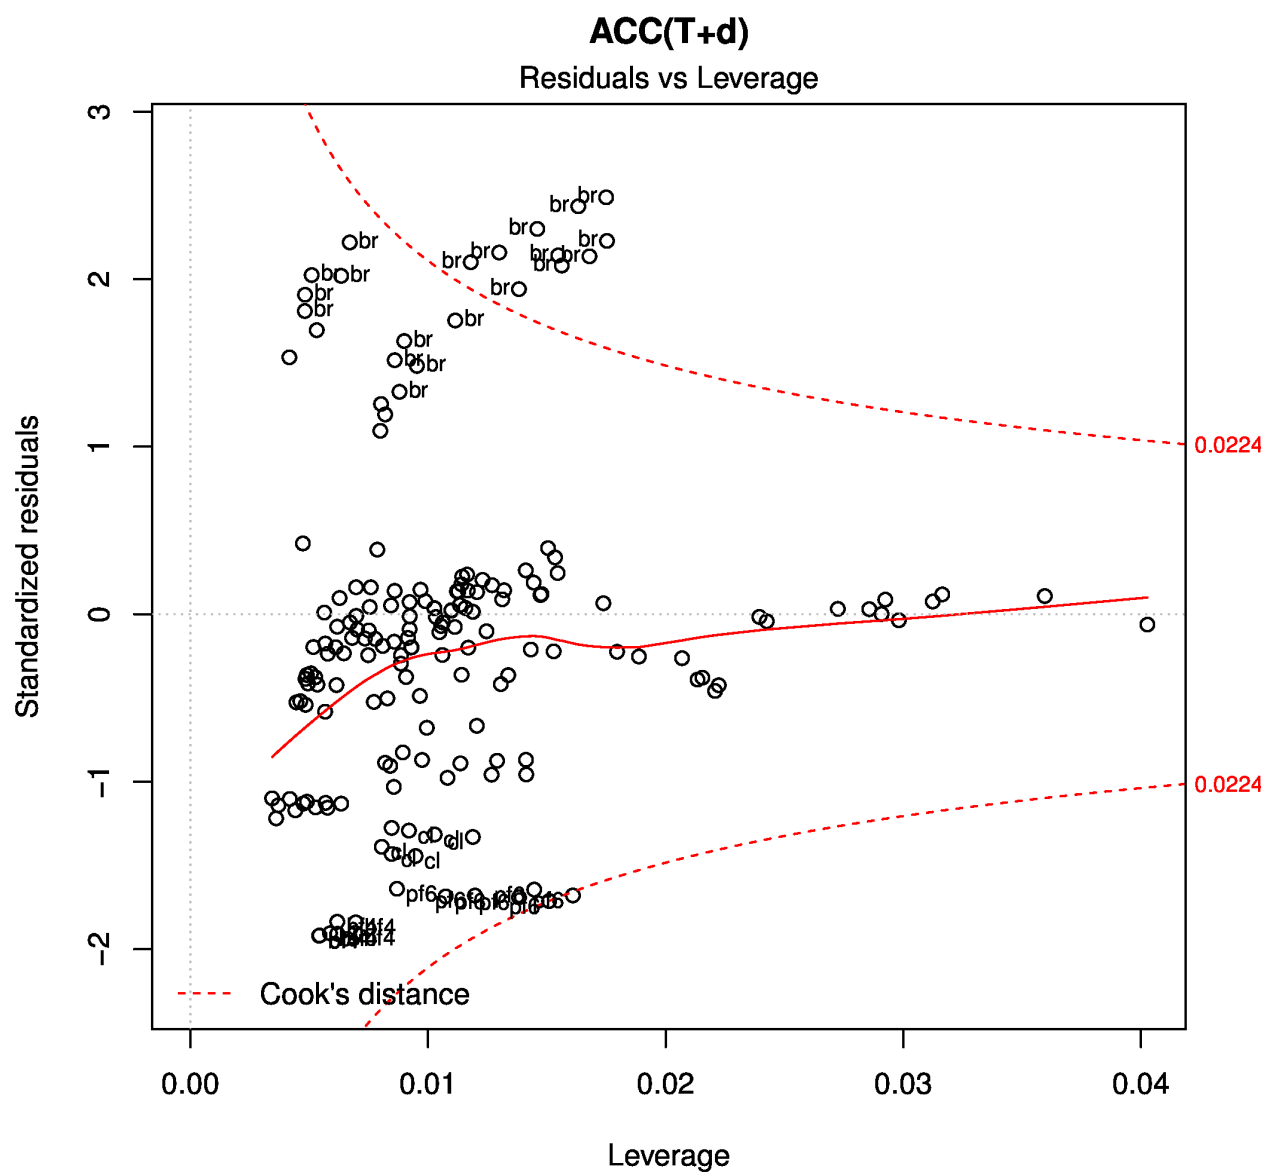

Figure S 68: Residuals vs Leverage plot



### 3.1.18 CBS(aug) basis set

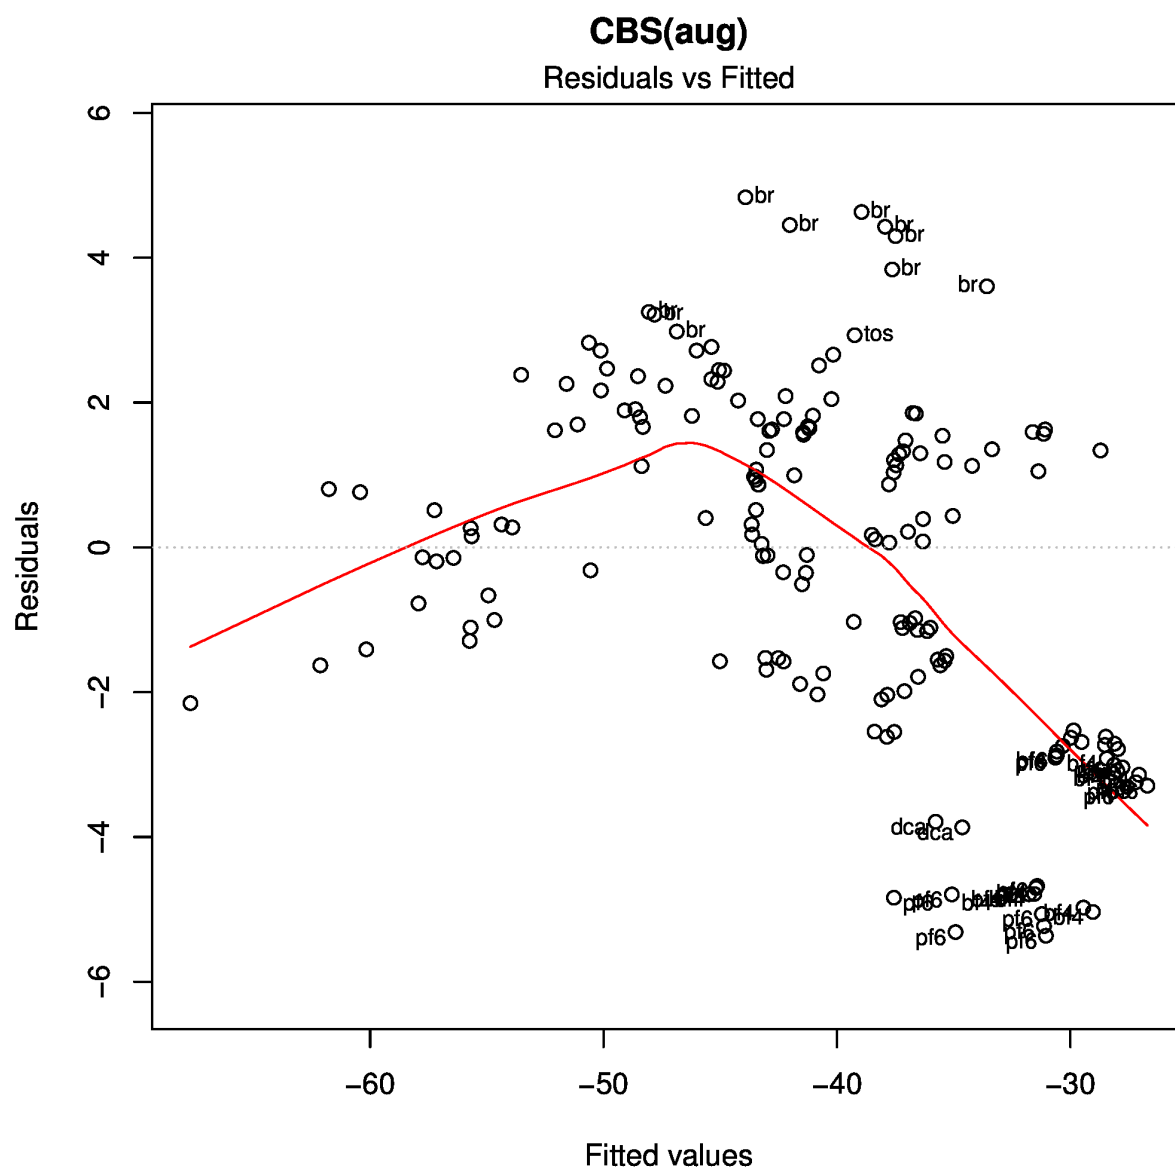

Figure S 69: Residuals vs Fitted values



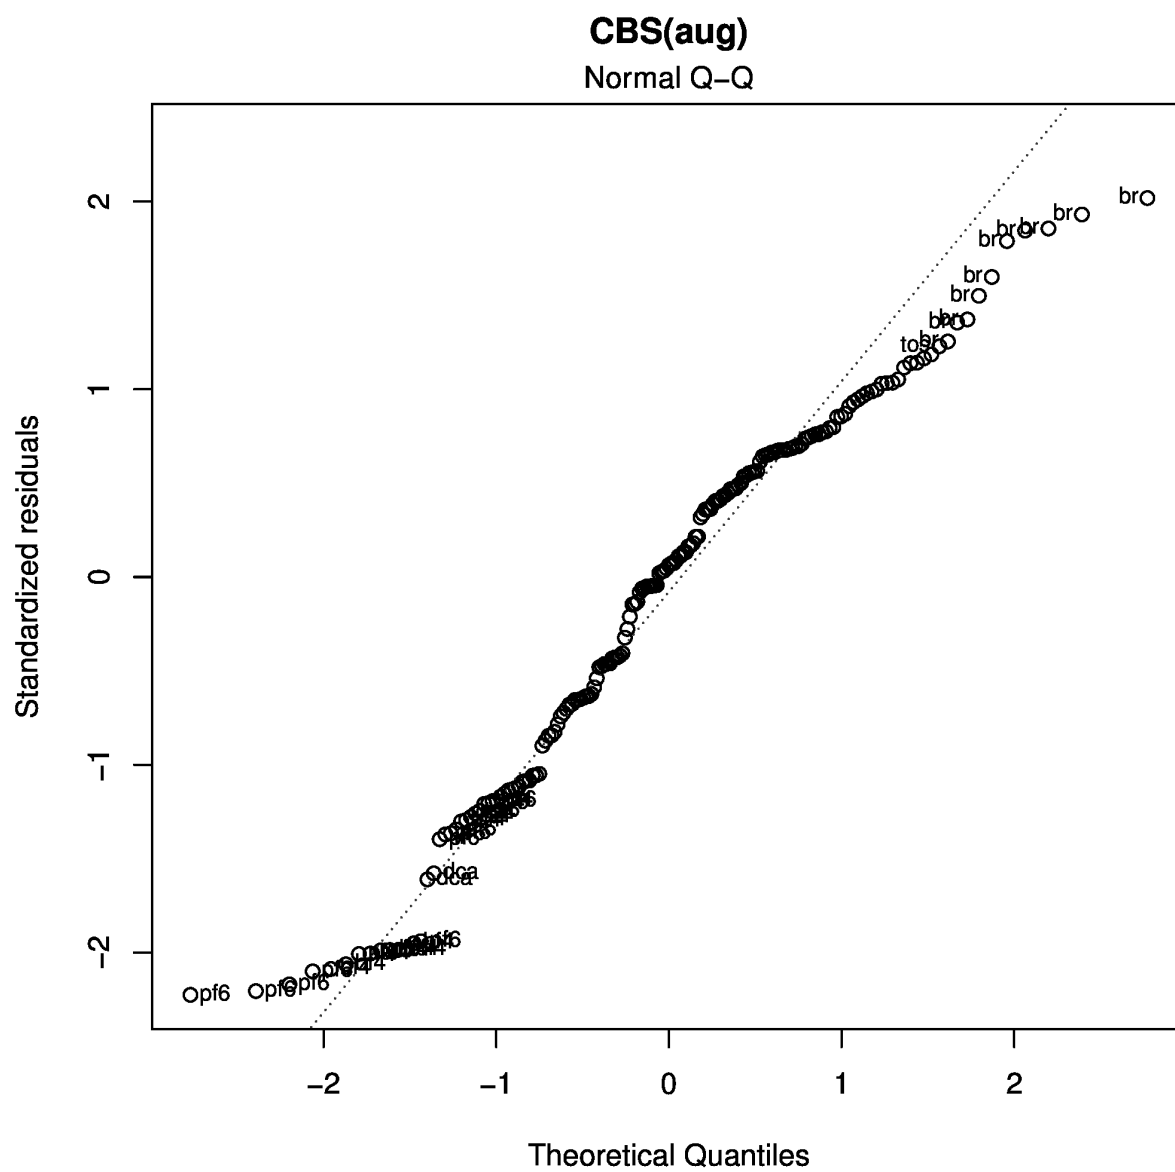

Figure S 70: Q-Q plot



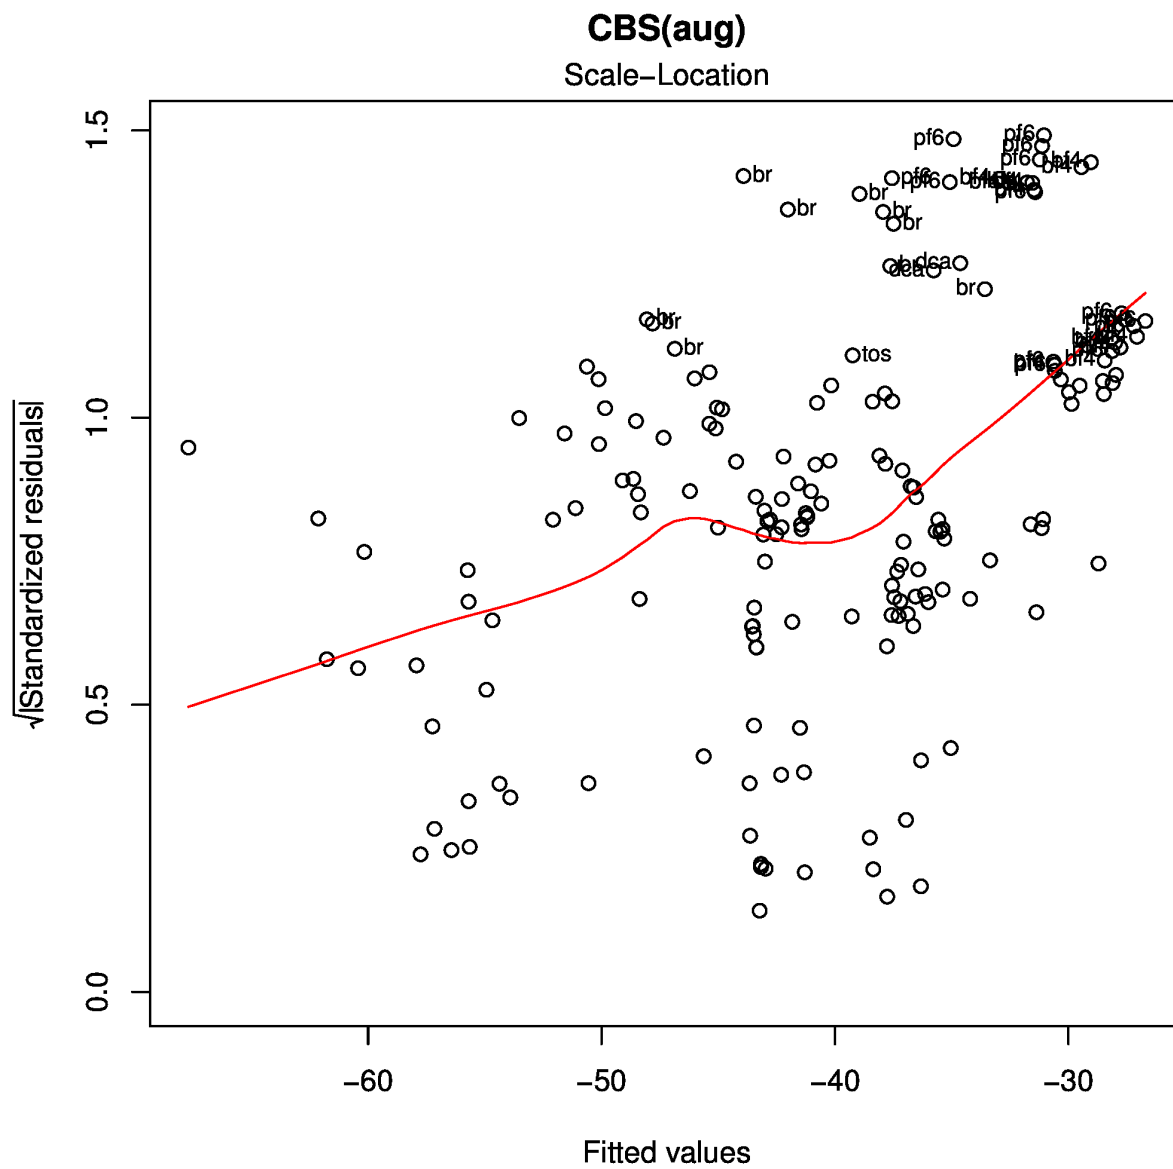

Figure S 71: Scale-Location plot



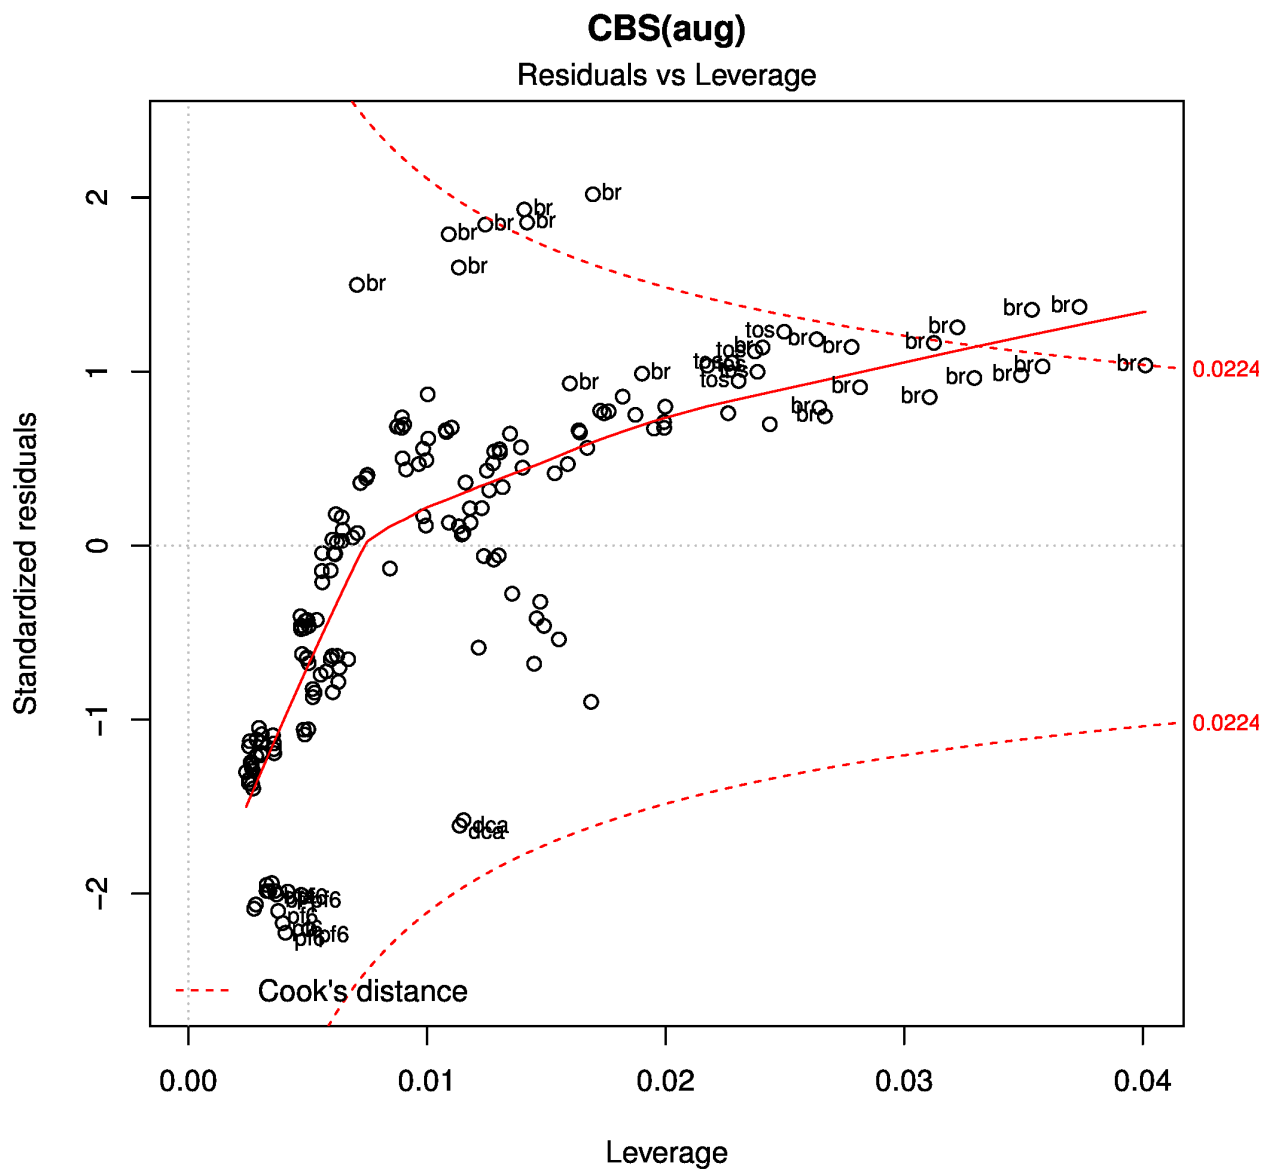

Figure S 72: Residuals vs Leverage plot



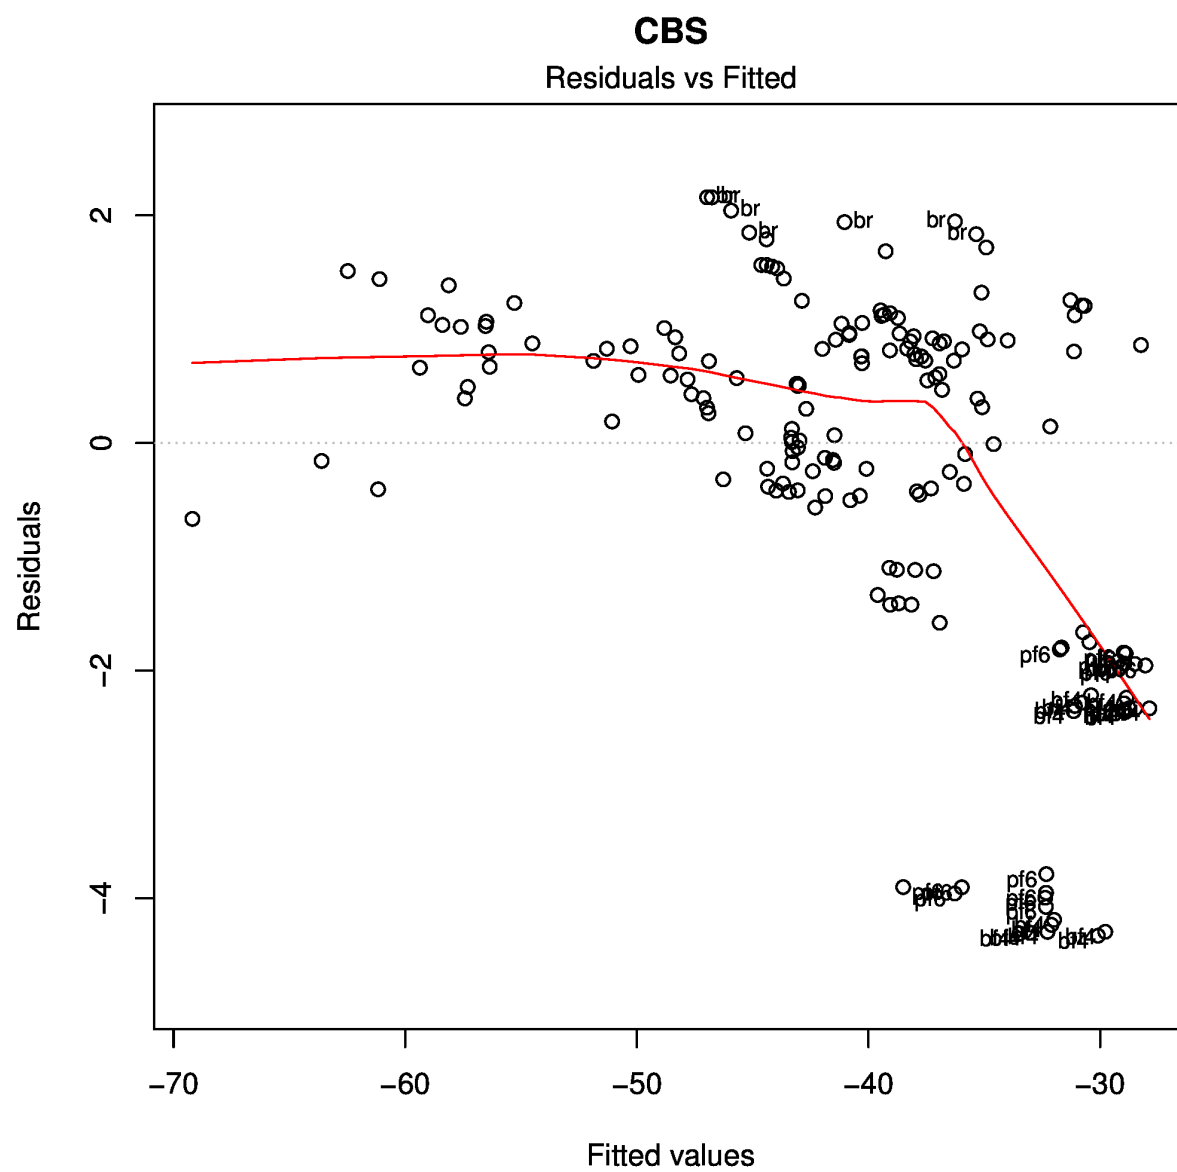

Figure S 73: Residuals vs Fitted values



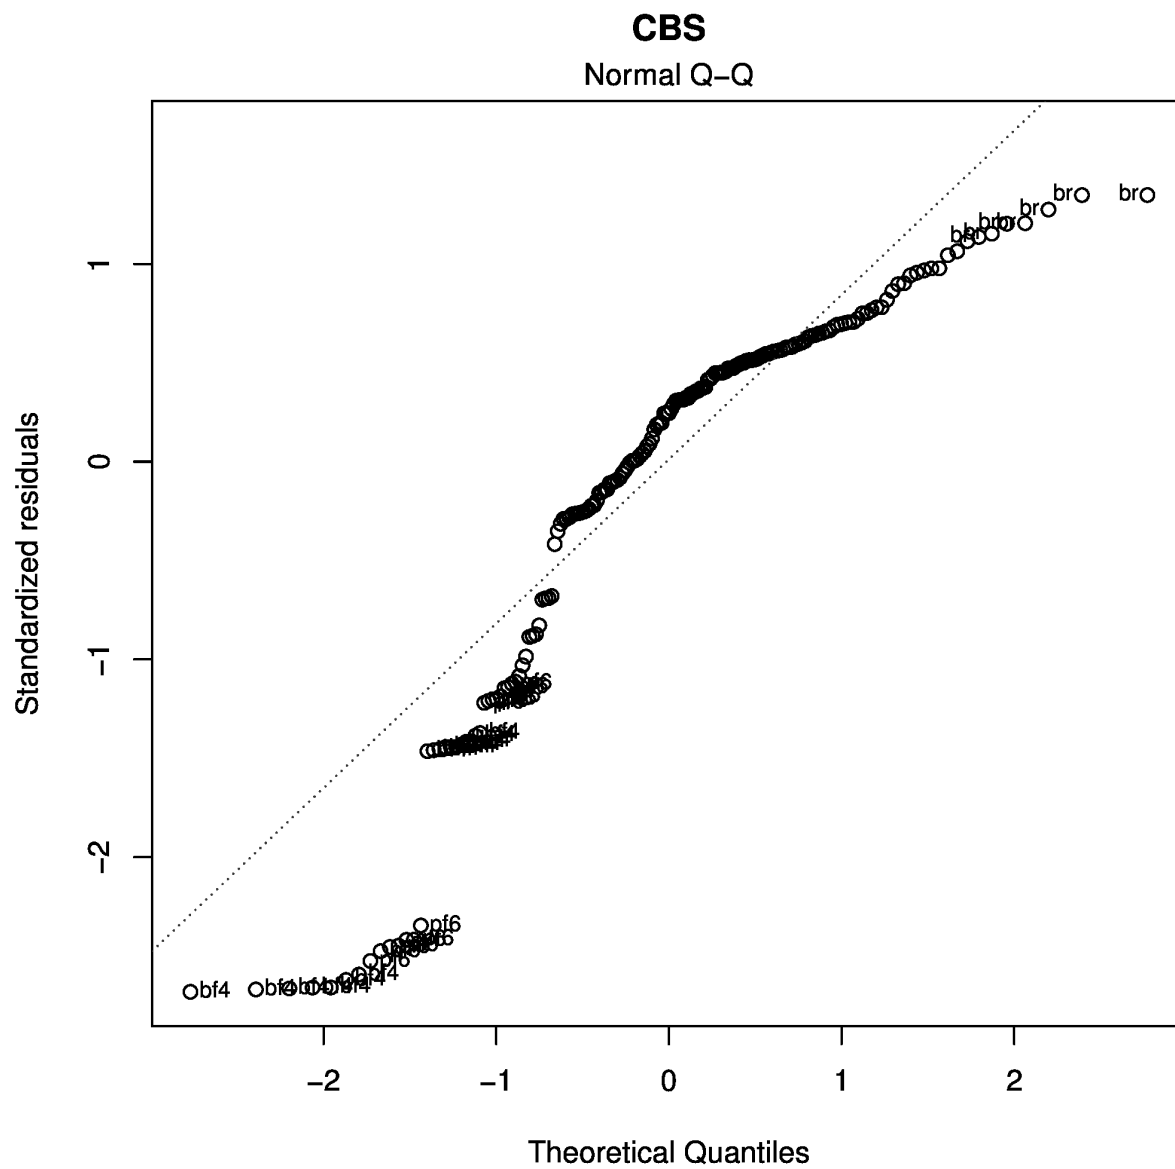

Figure S 74: Q-Q plot



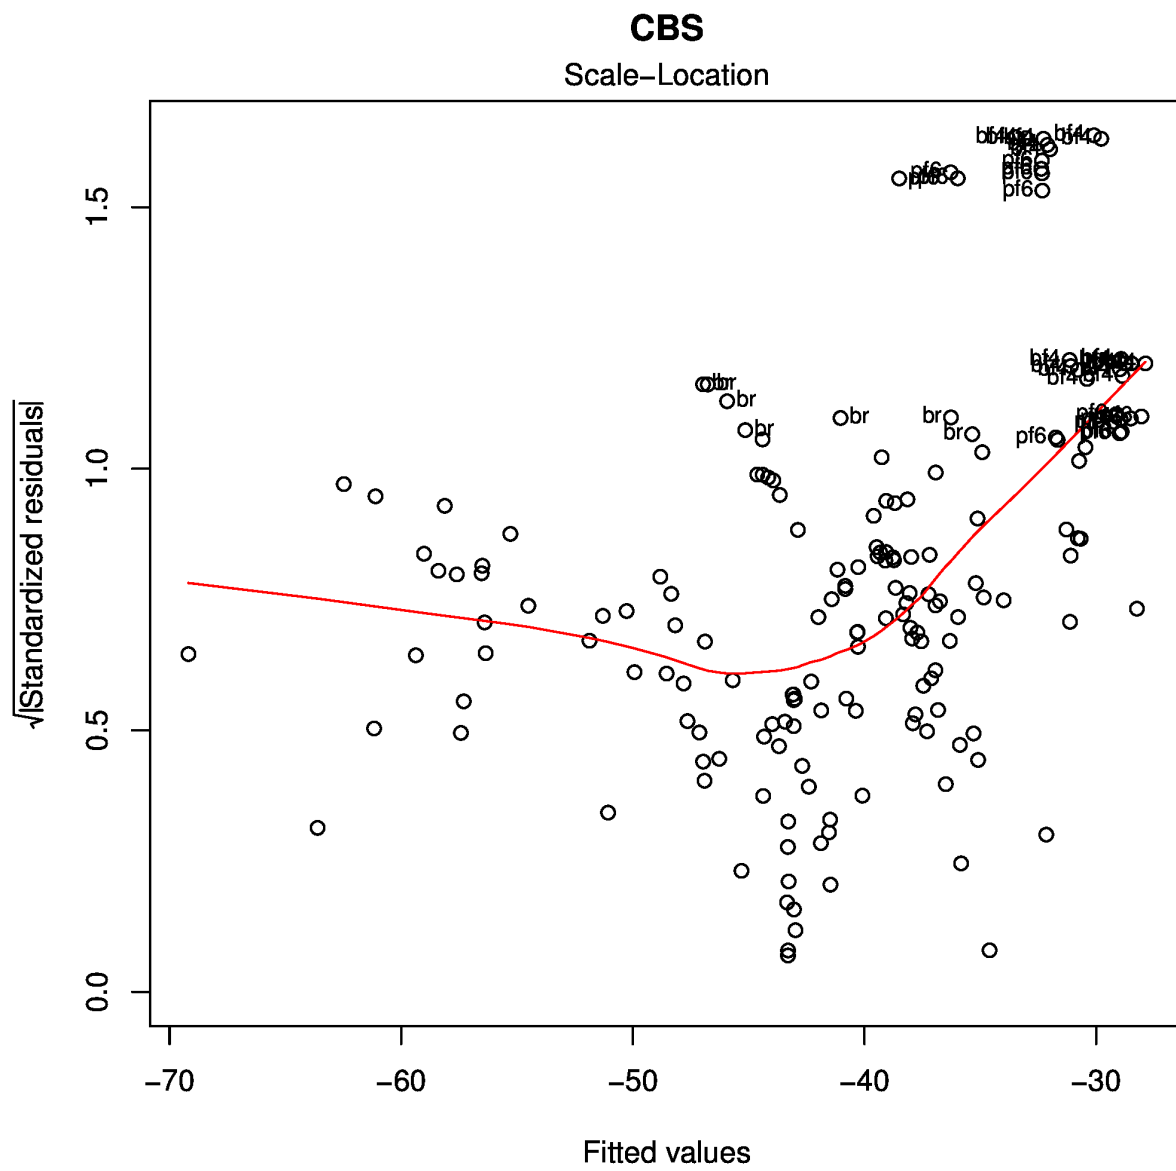

Figure S 75: Scale-Location plot







## 3.2 SOS-MP2 regression

### 3.2.1 KSV(P) basis set

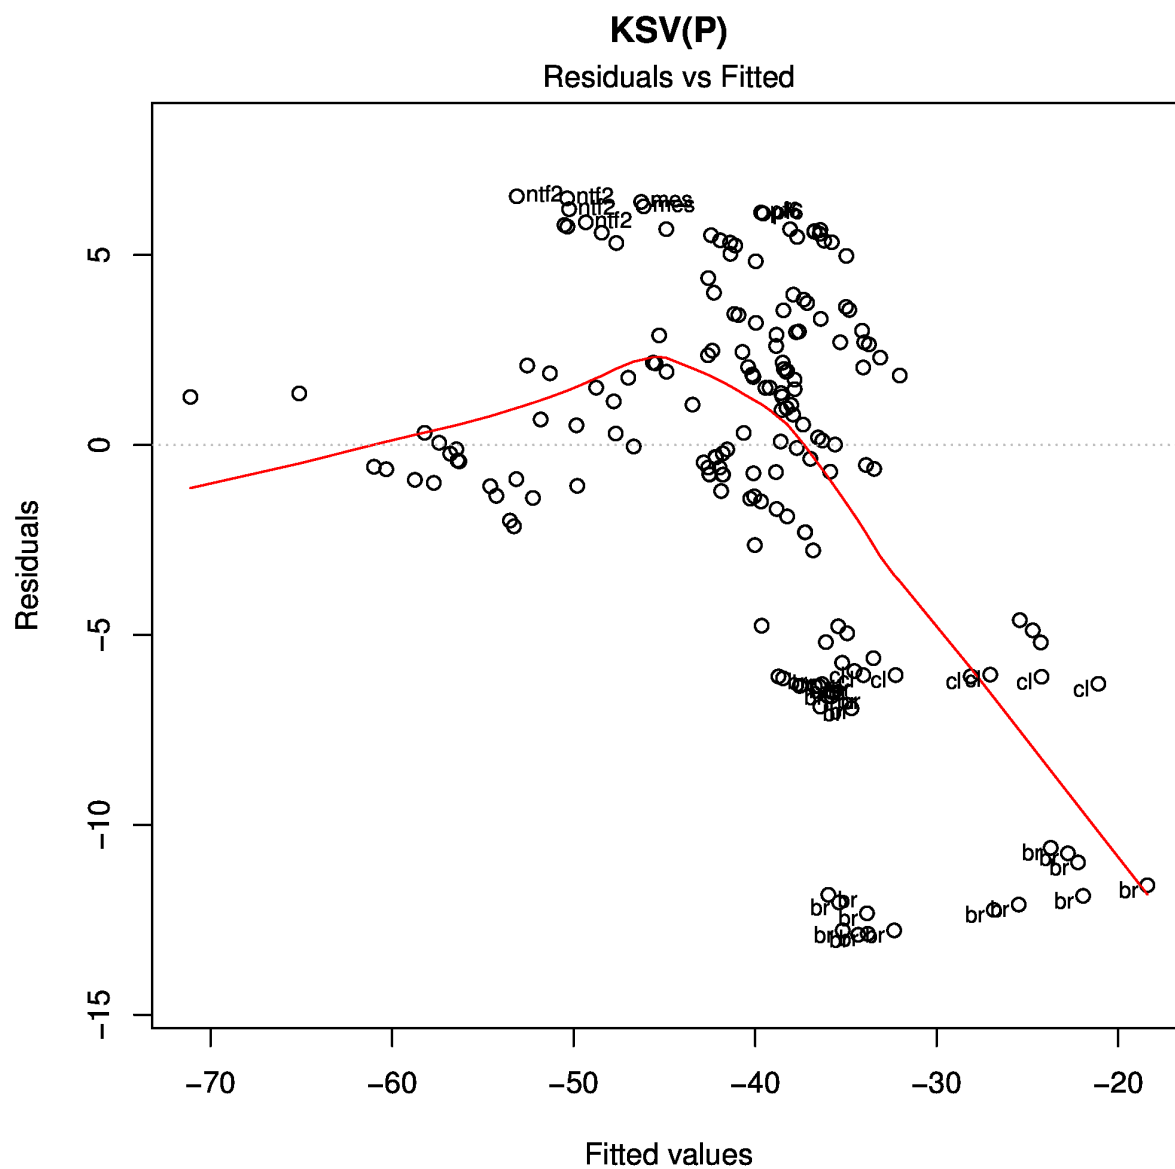

Figure S 77: Residuals vs Fitted values



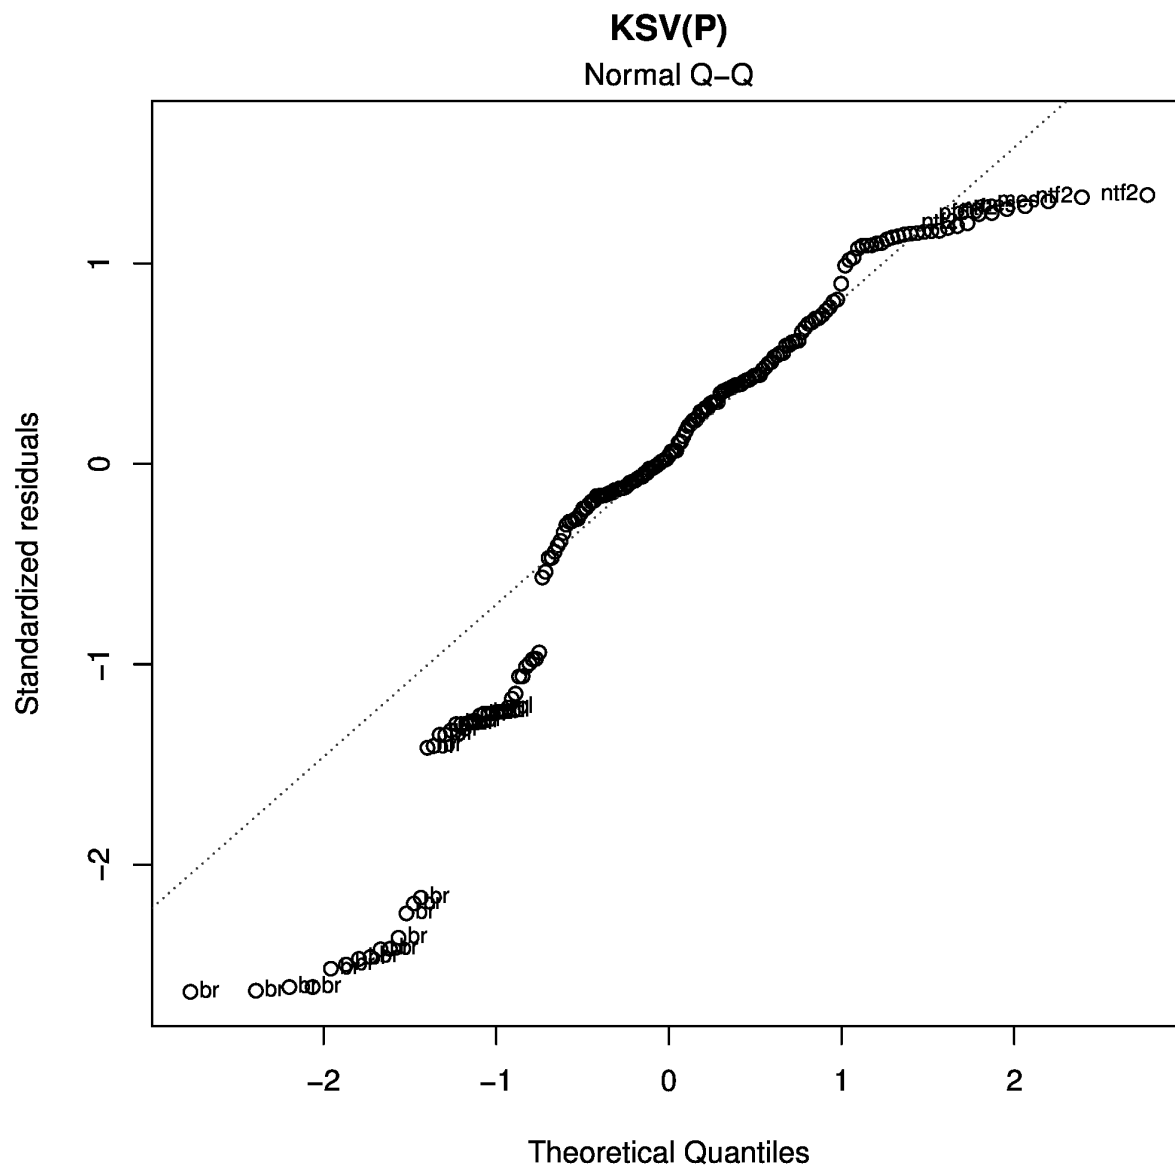

Figure S 78: Q-Q plot



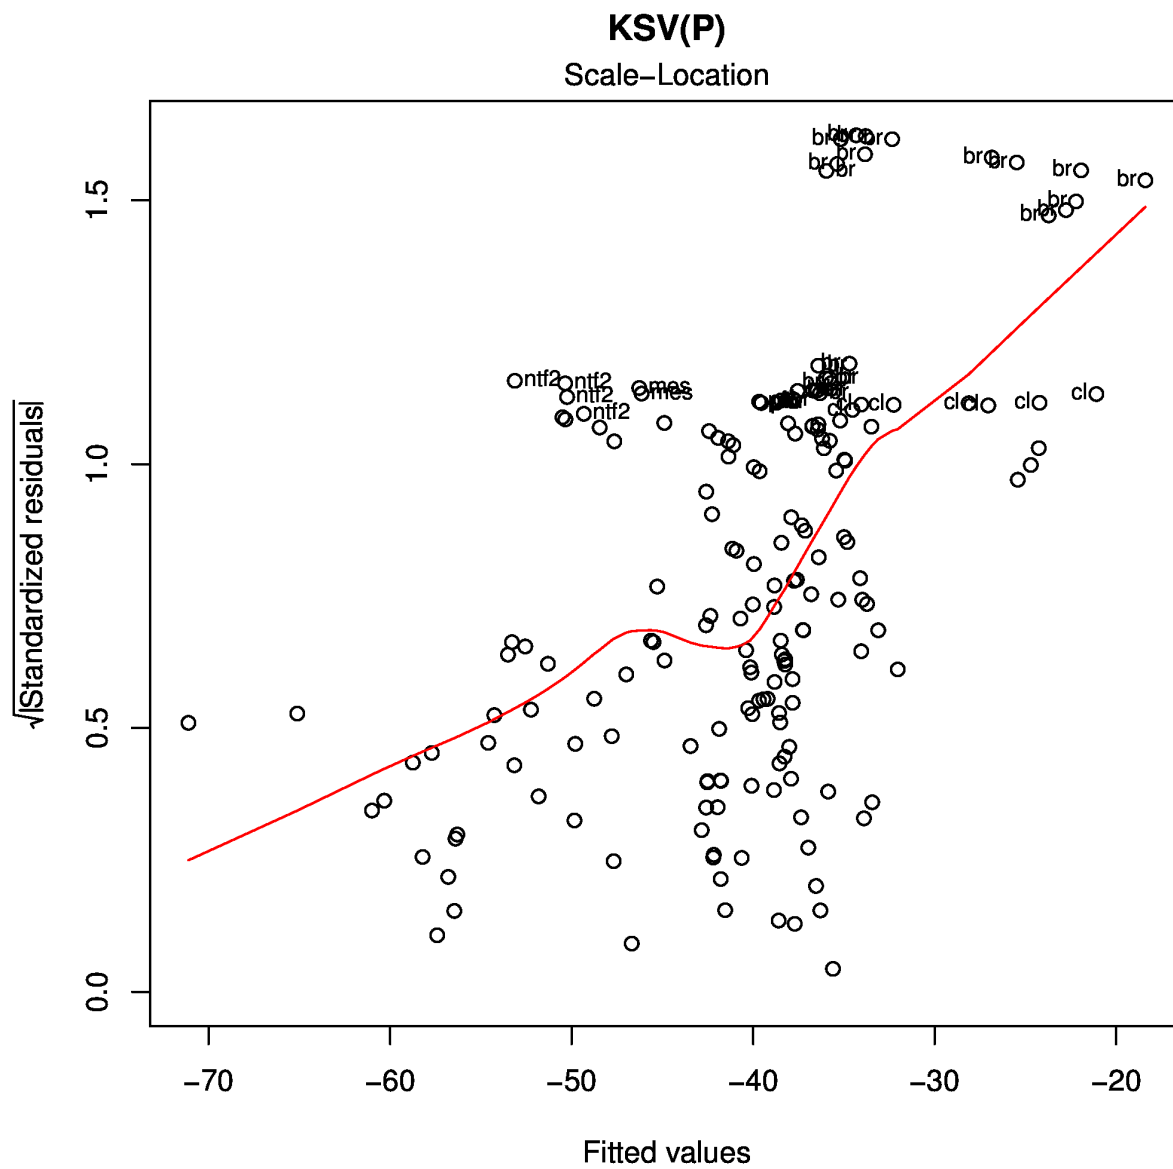

Figure S 79: Scale-Location plot



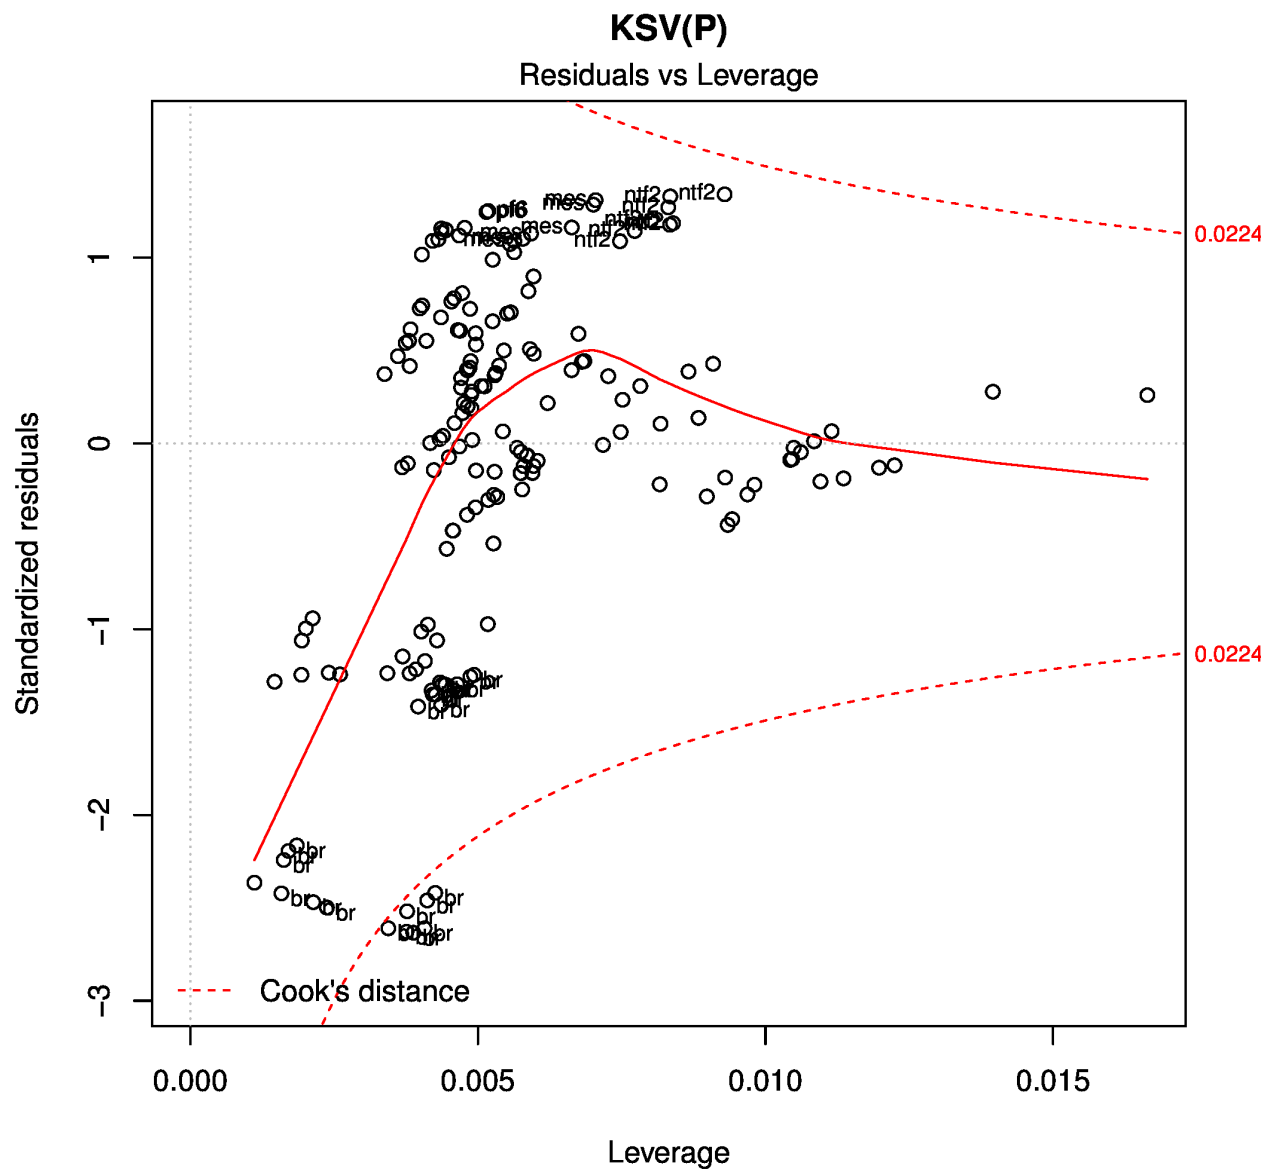

Figure S 80: Residuals vs Leverage plot



### 3.2.2 KSVP basis set

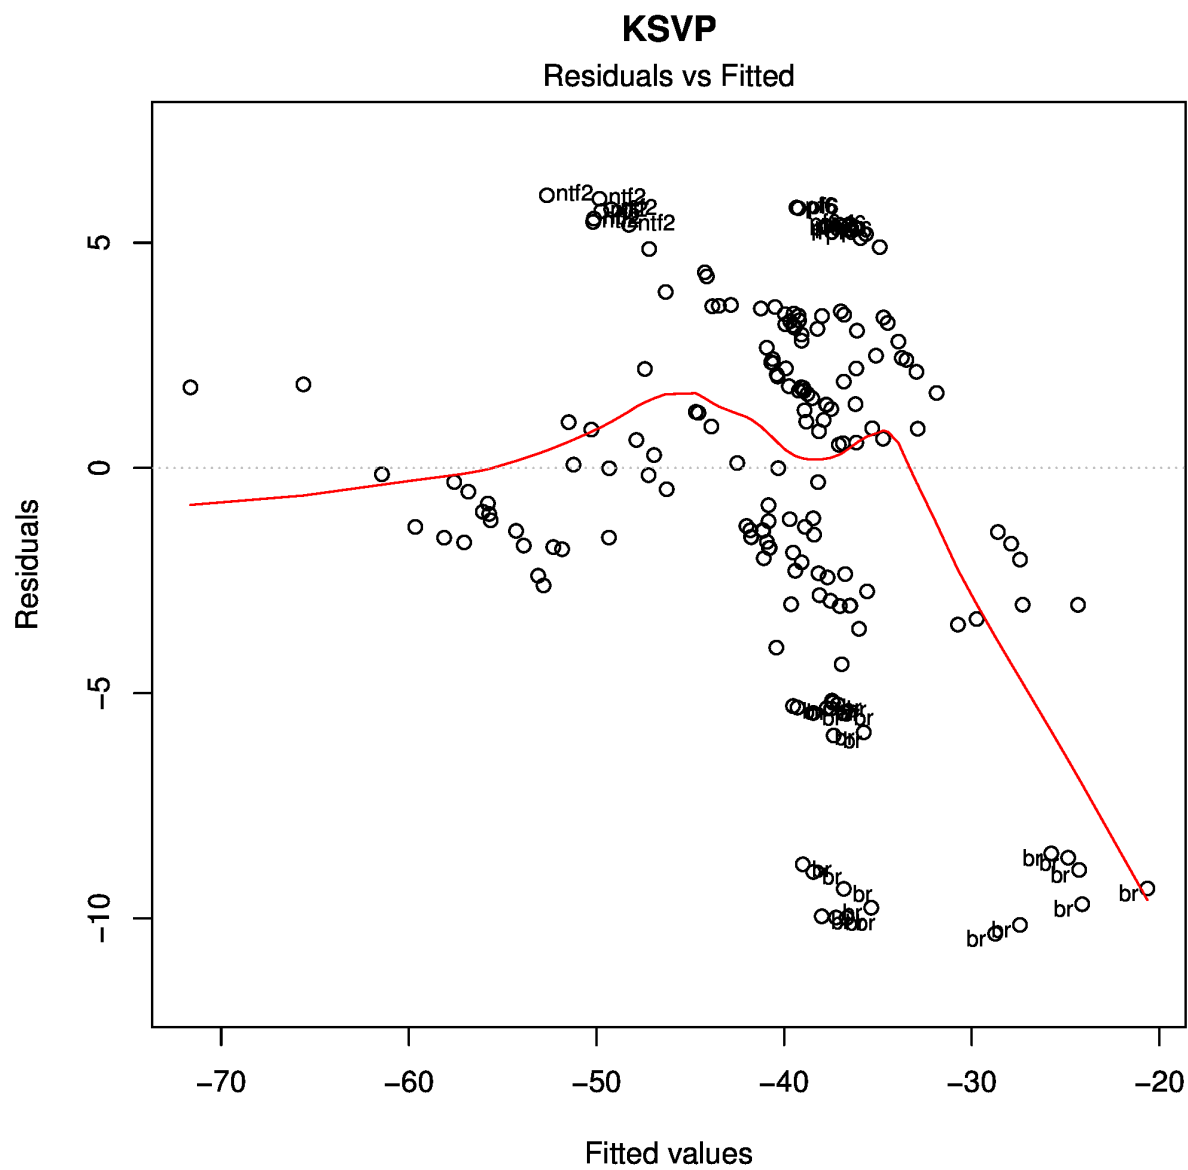

Figure S 81: Residuals vs Fitted values



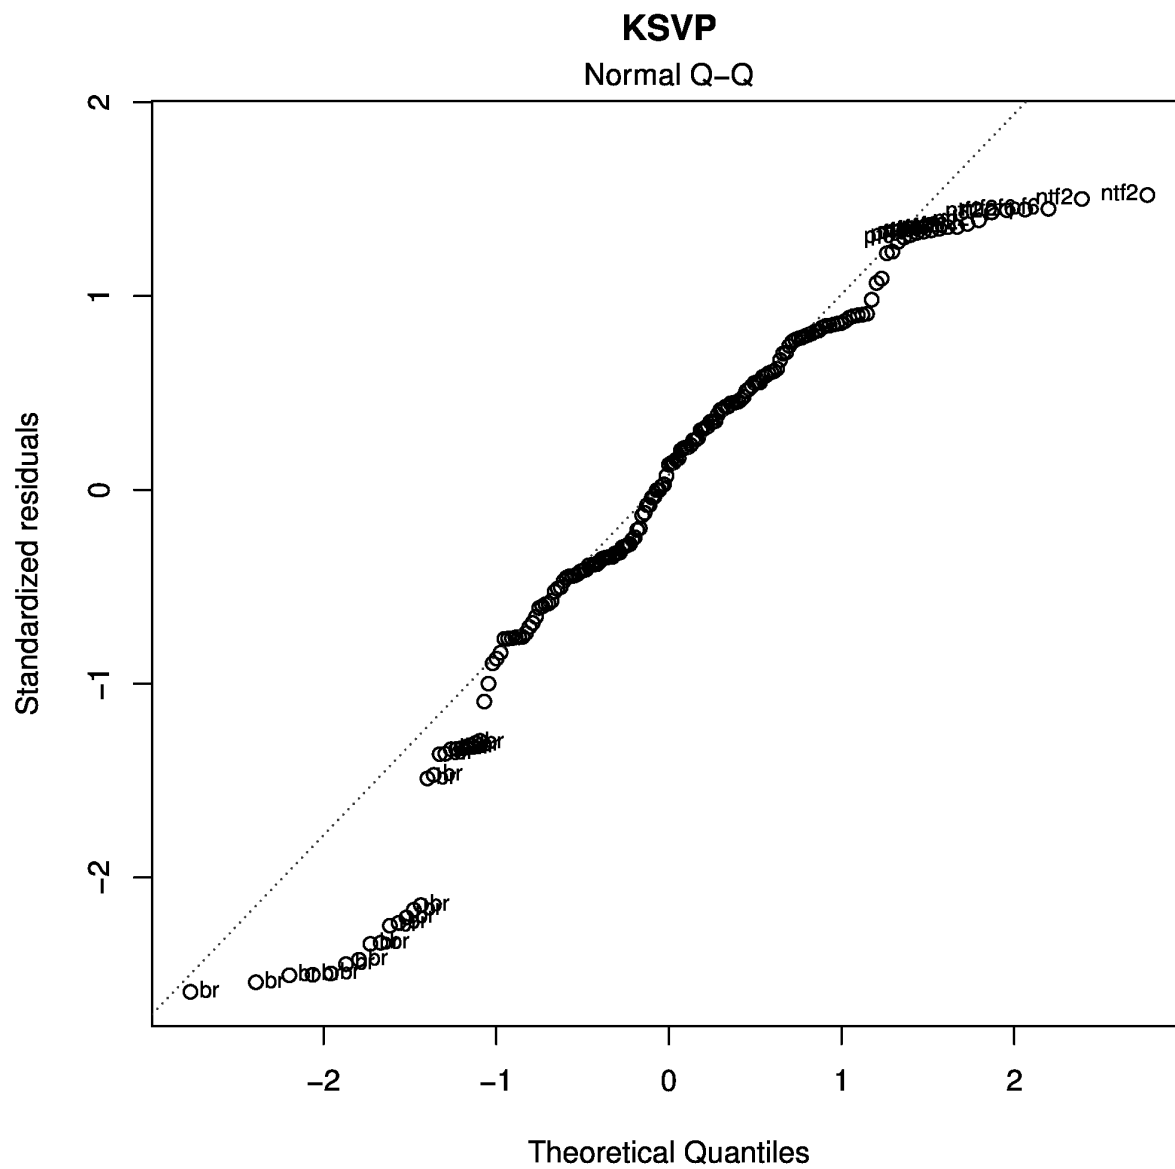

Figure S 82: Q-Q plot



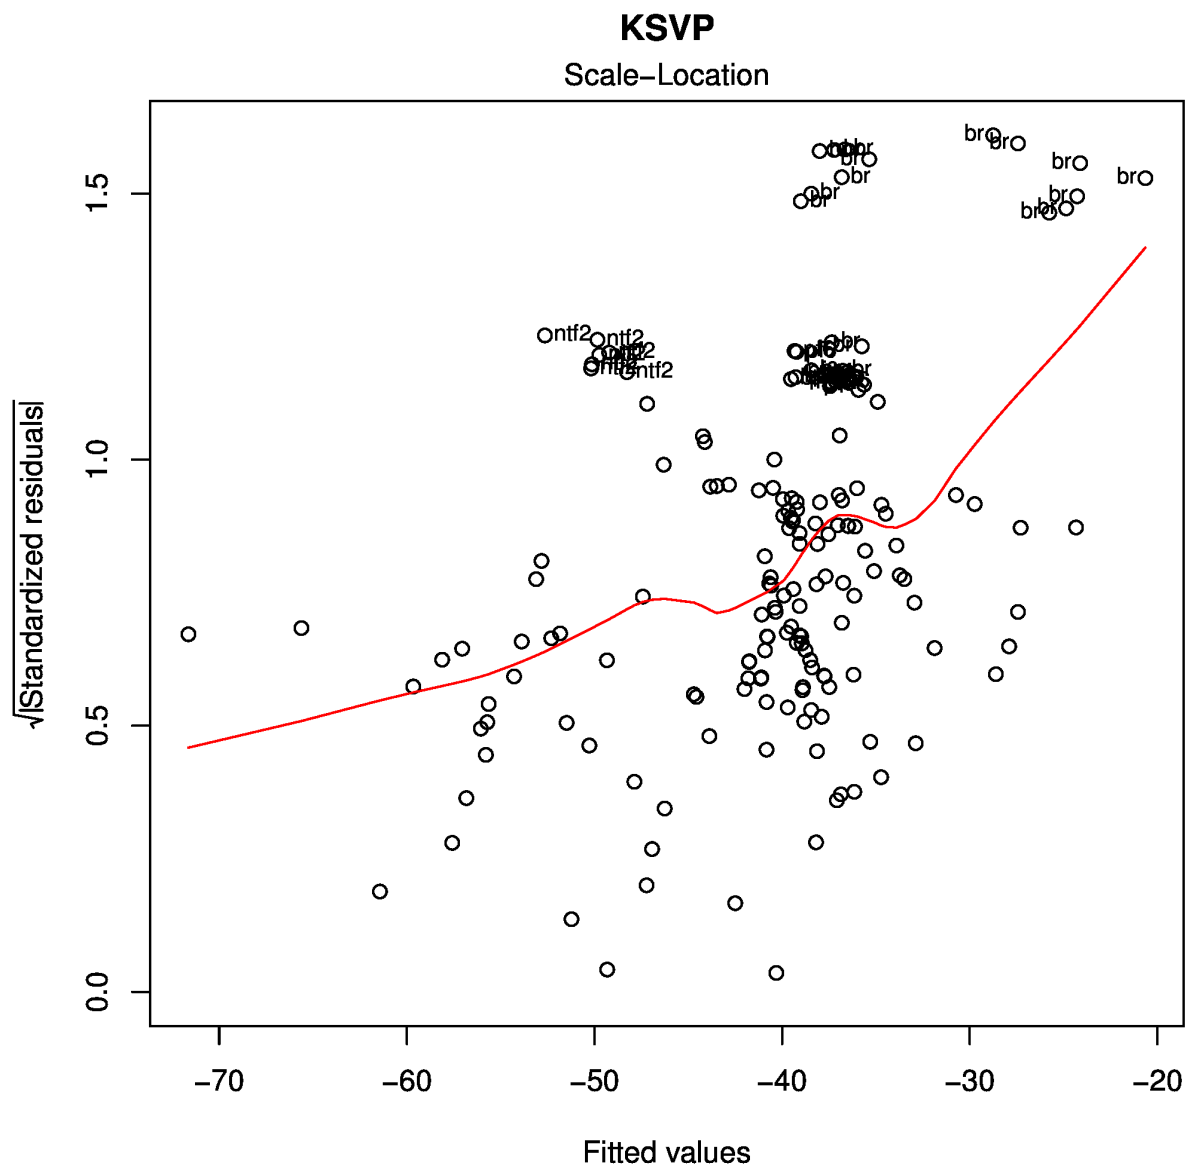

Figure S 83: Scale-Location plot



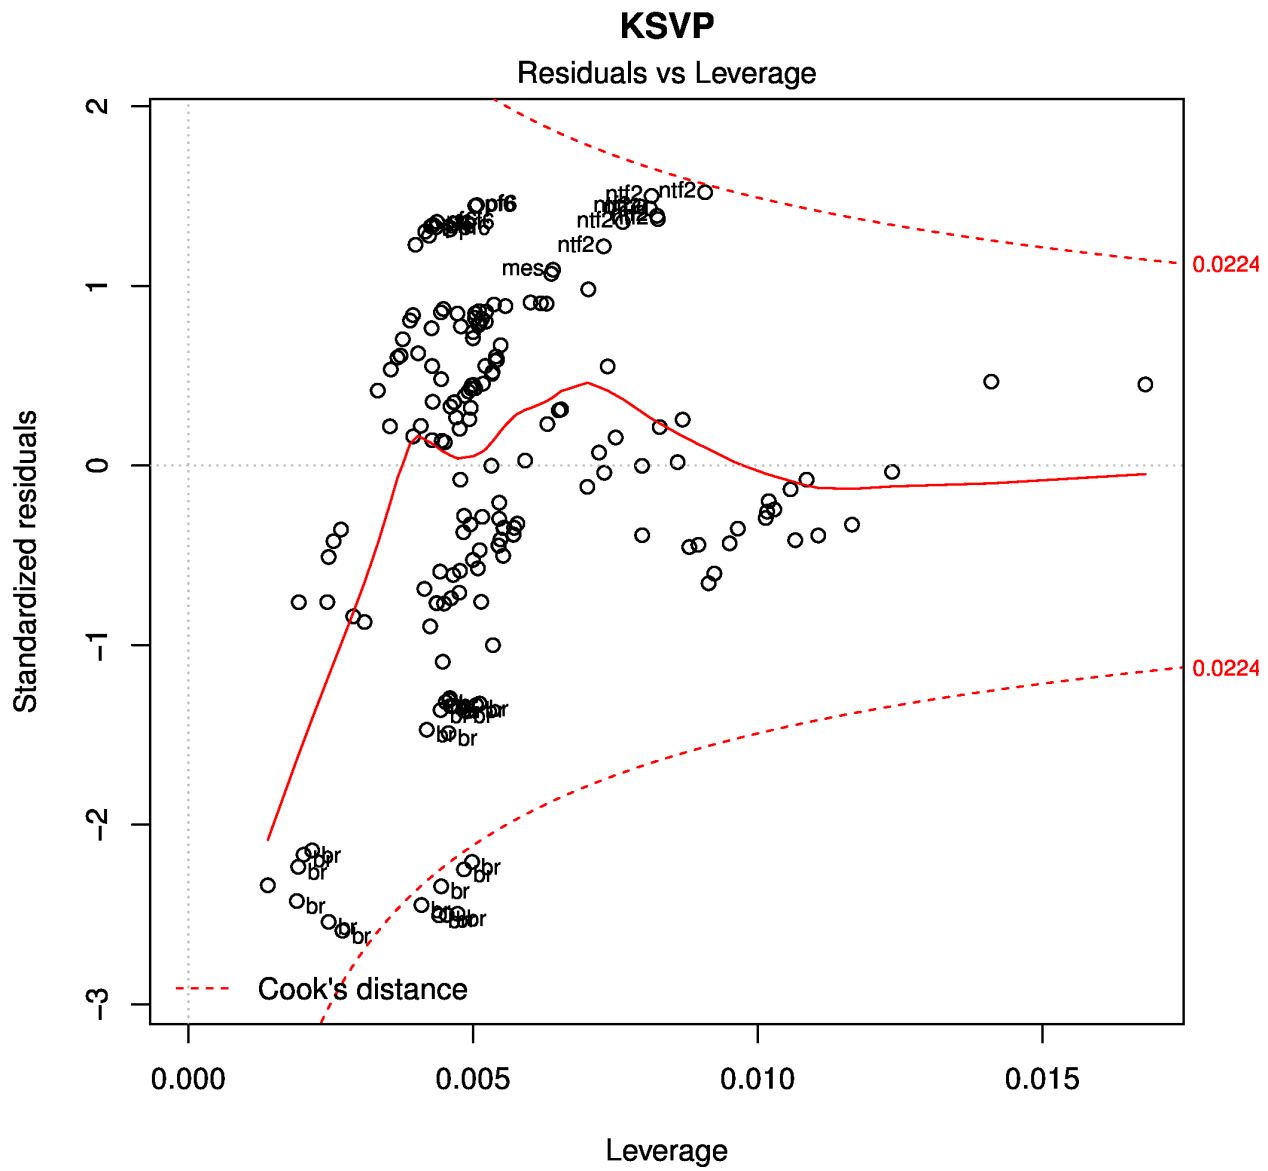

Figure S 84: Residuals vs Leverage plot



### 3.2.3 KTZVP basis set

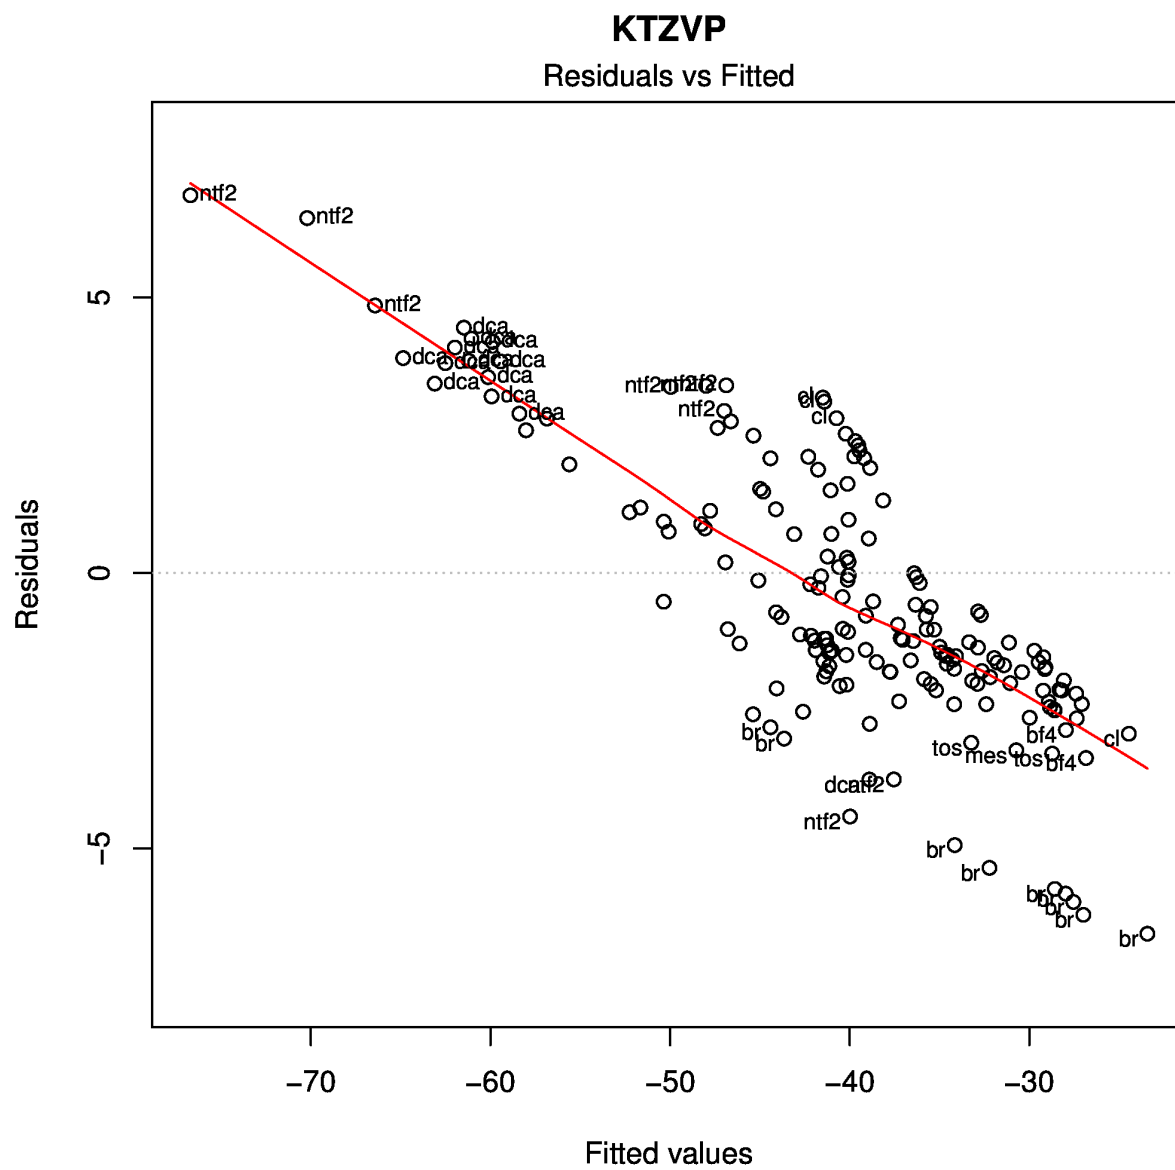

Figure S 85: Residuals vs Fitted values







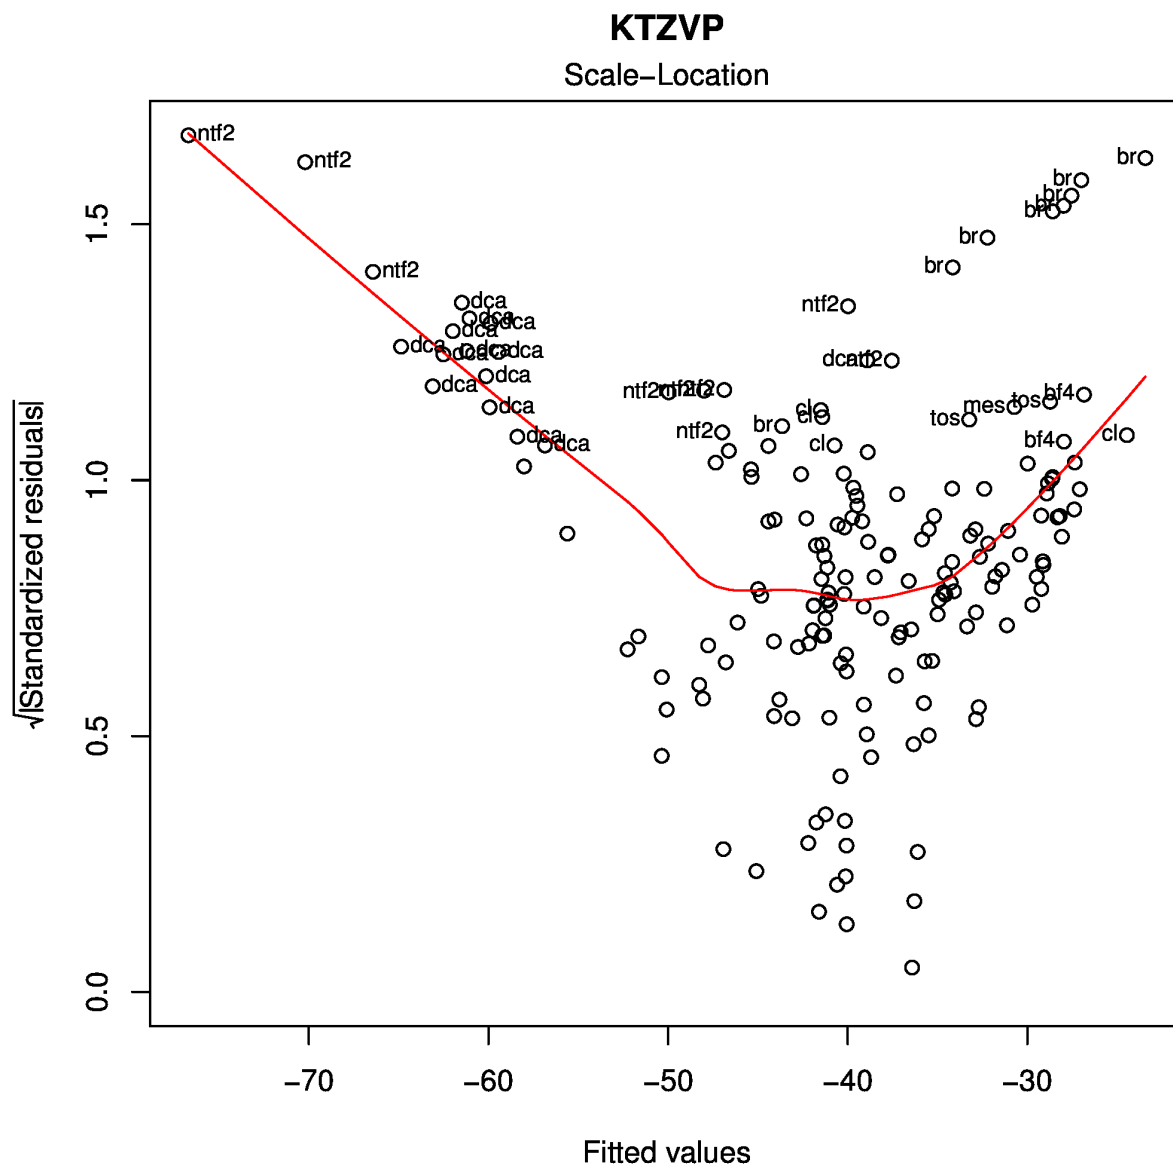

Figure S 87: Scale-Location plot



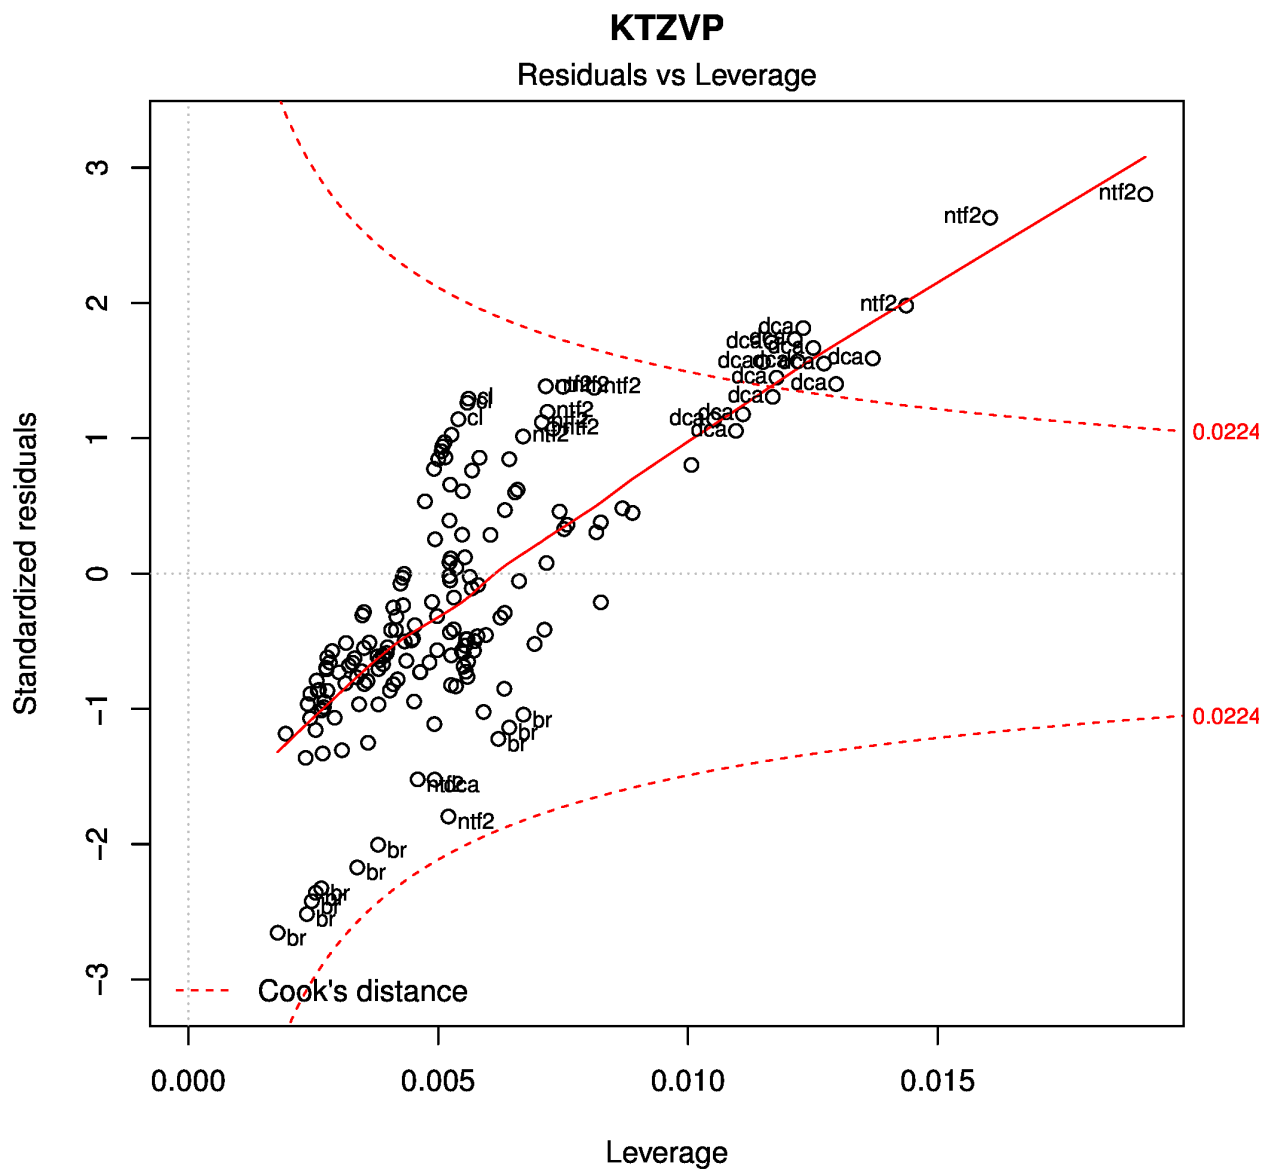

Figure S 88: Residuals vs Leverage plot



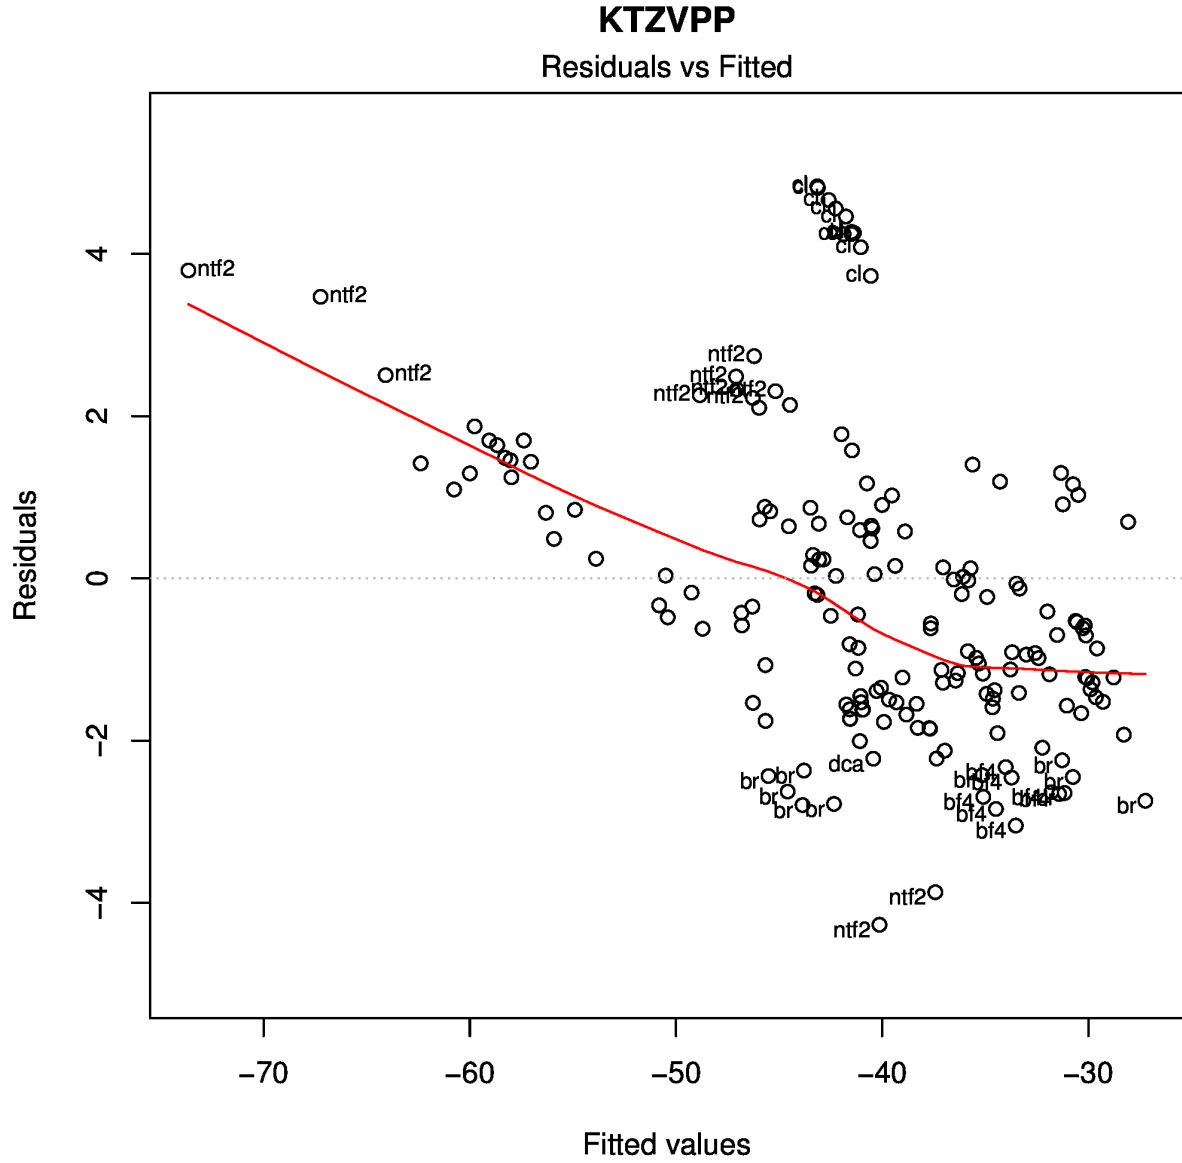

Figure S 89: Residuals vs Fitted values



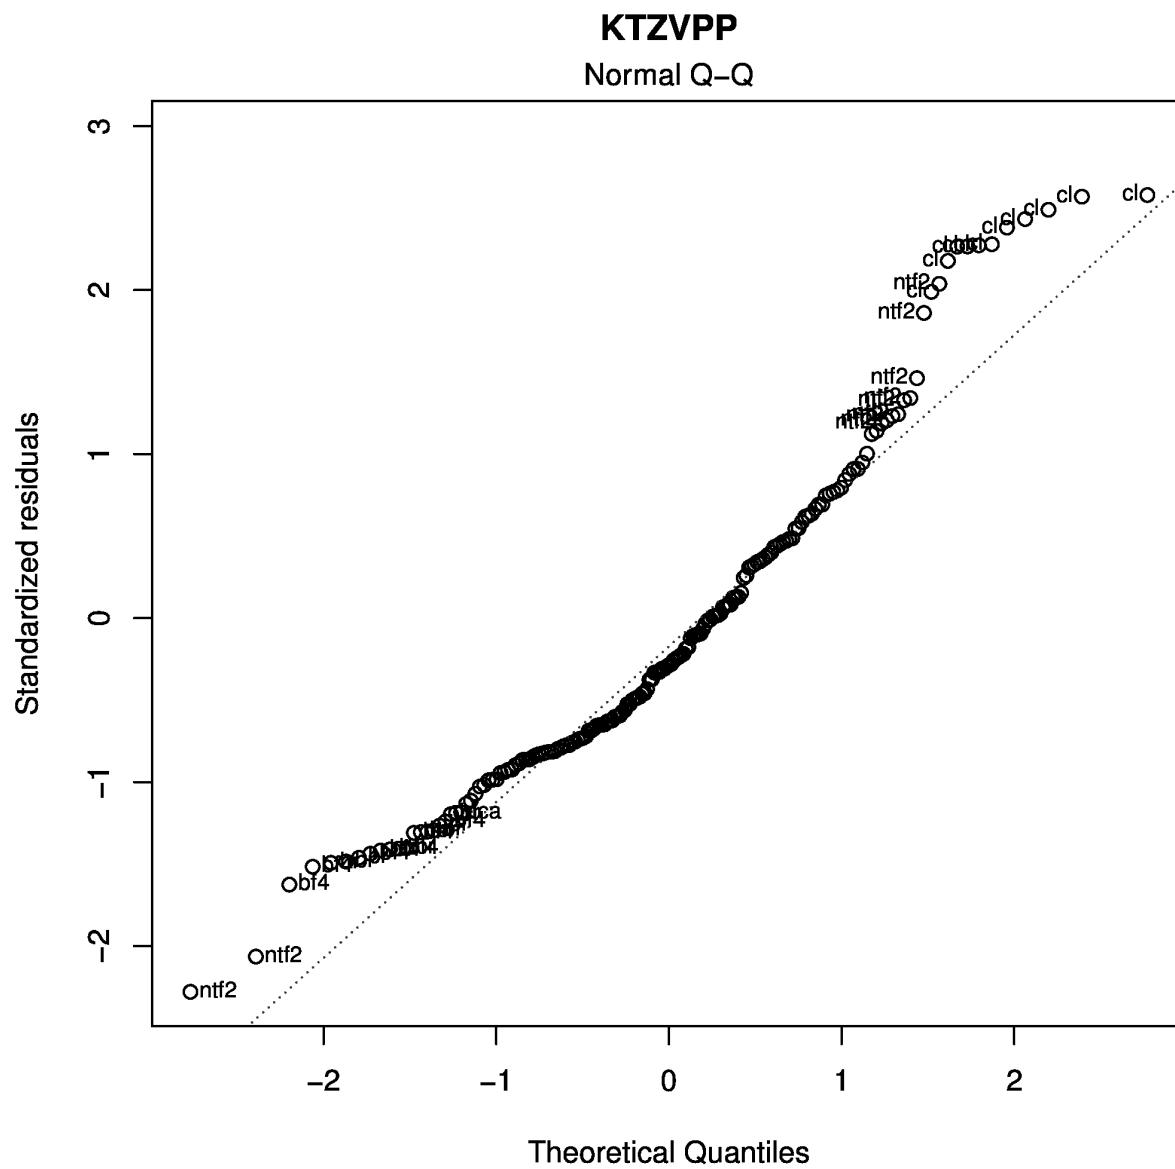

Figure S 90: Q-Q plot



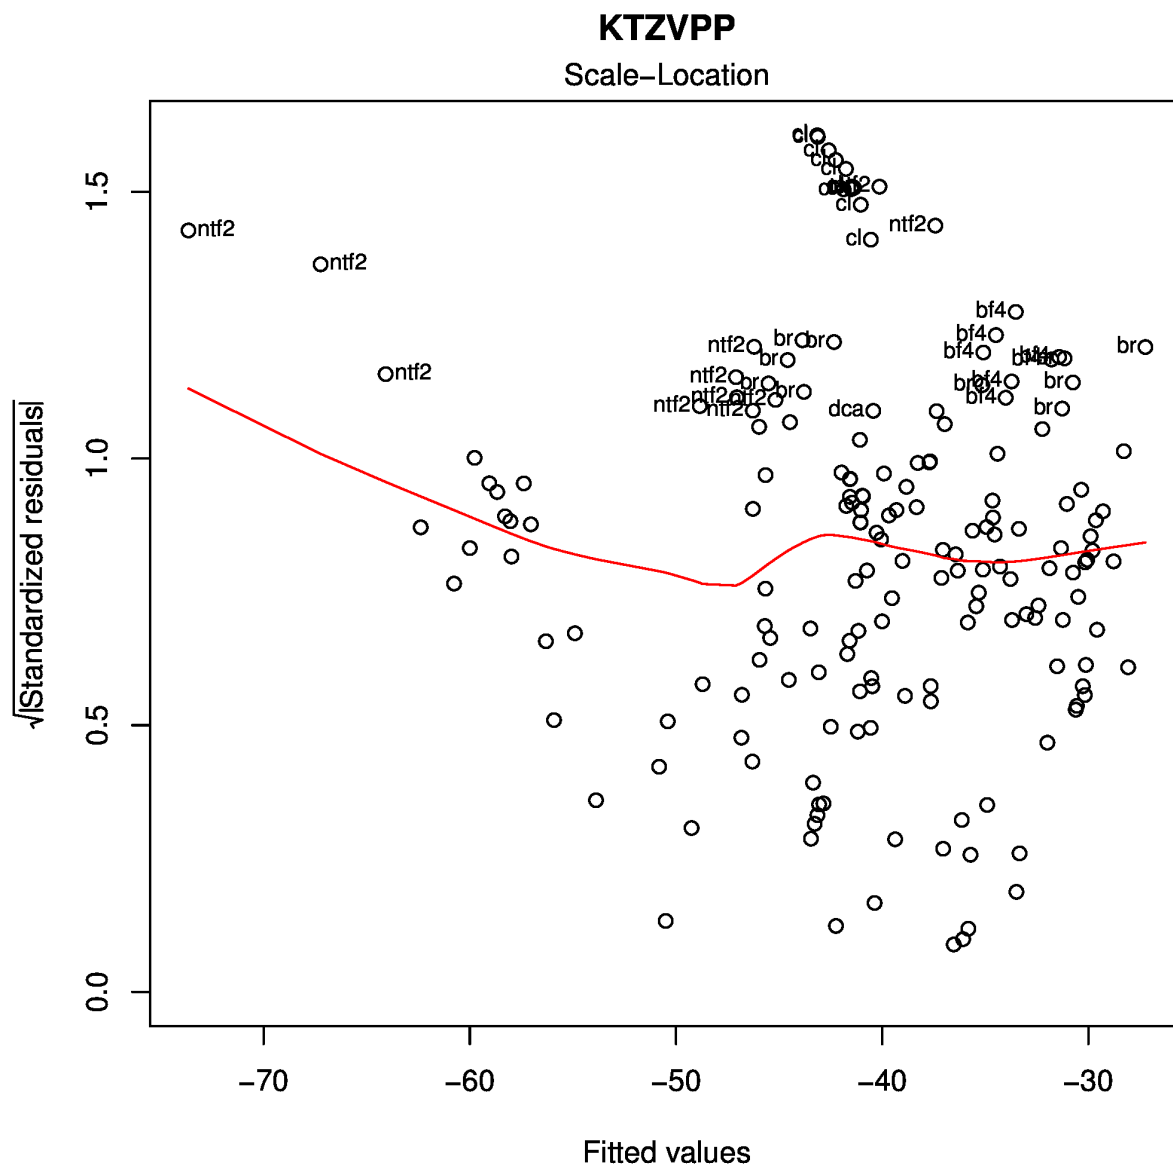

Figure S 91: Scale-Location plot



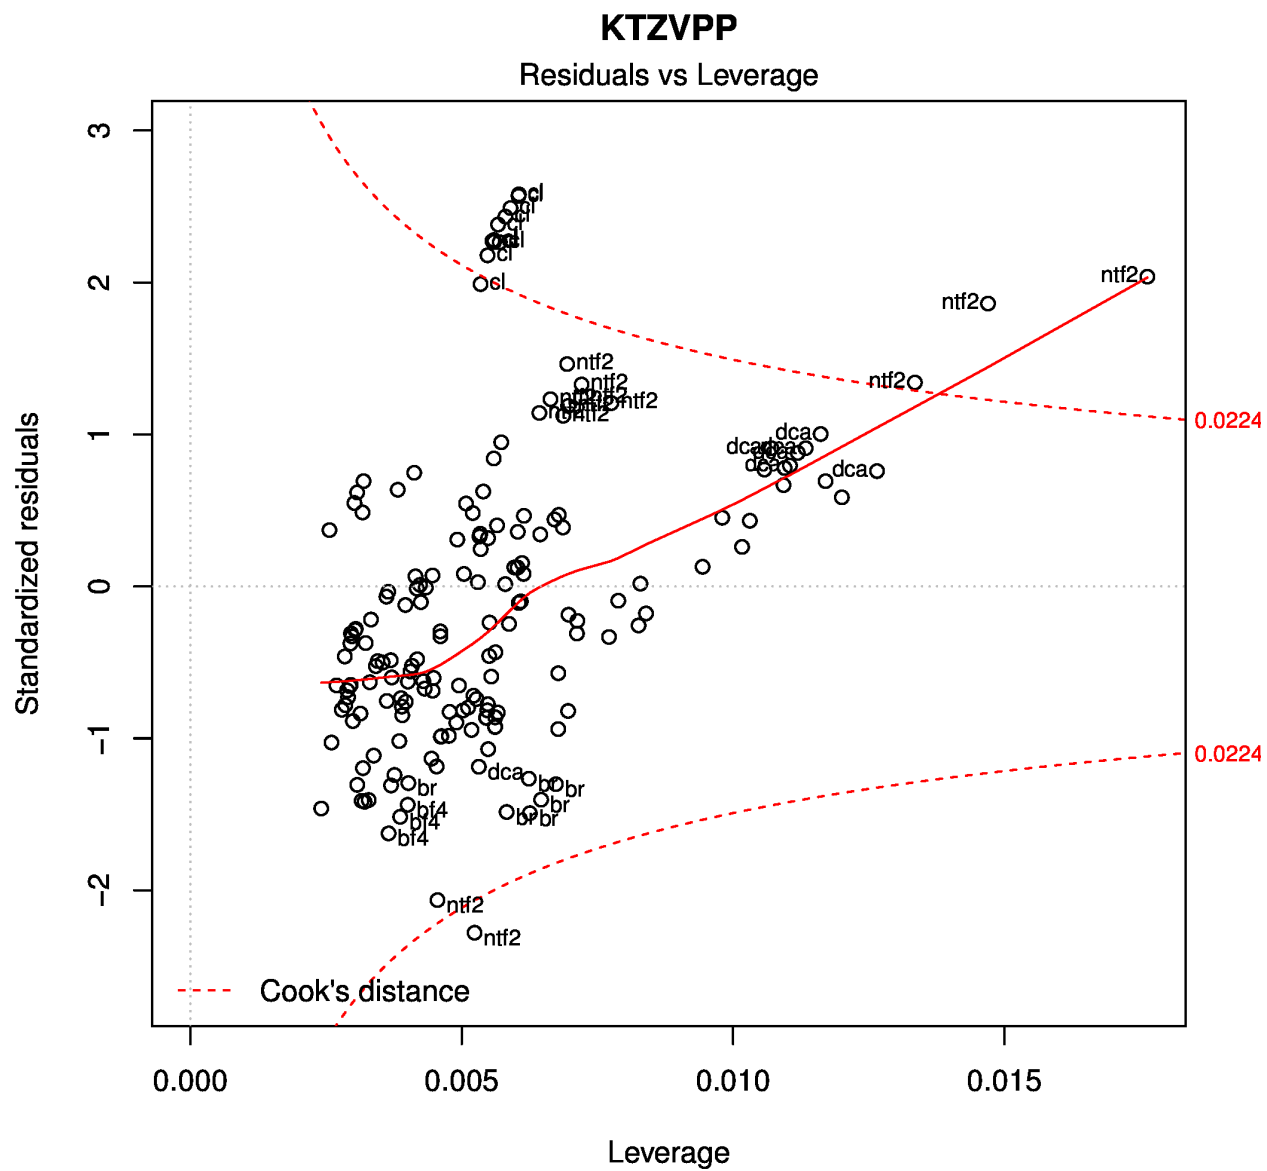

Figure S 92: Residuals vs Leverage plot



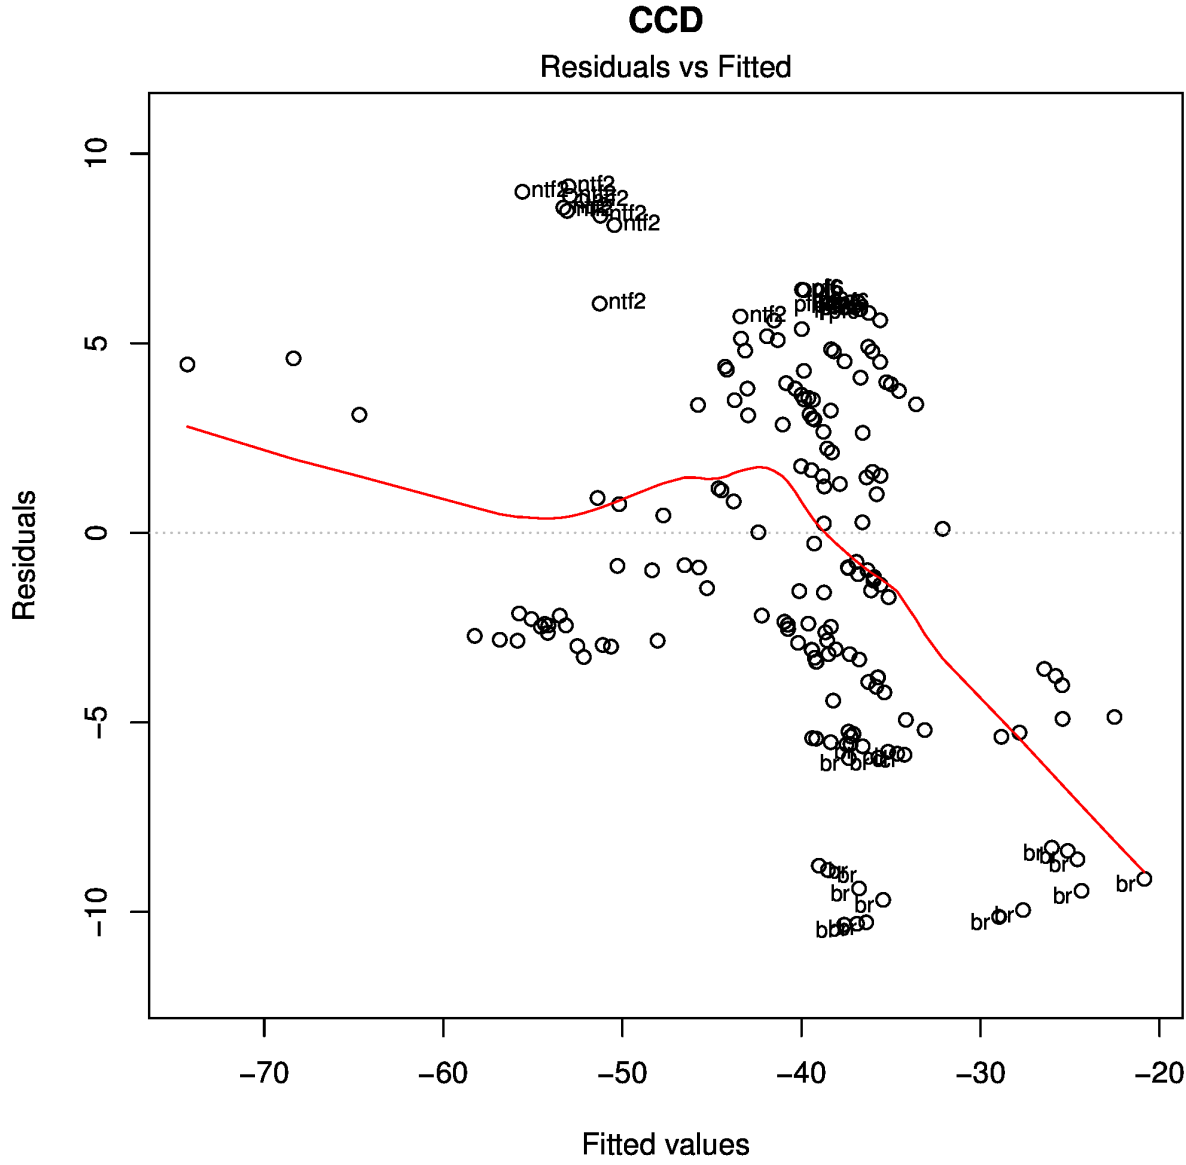

Figure S 93: Residuals vs Fitted values



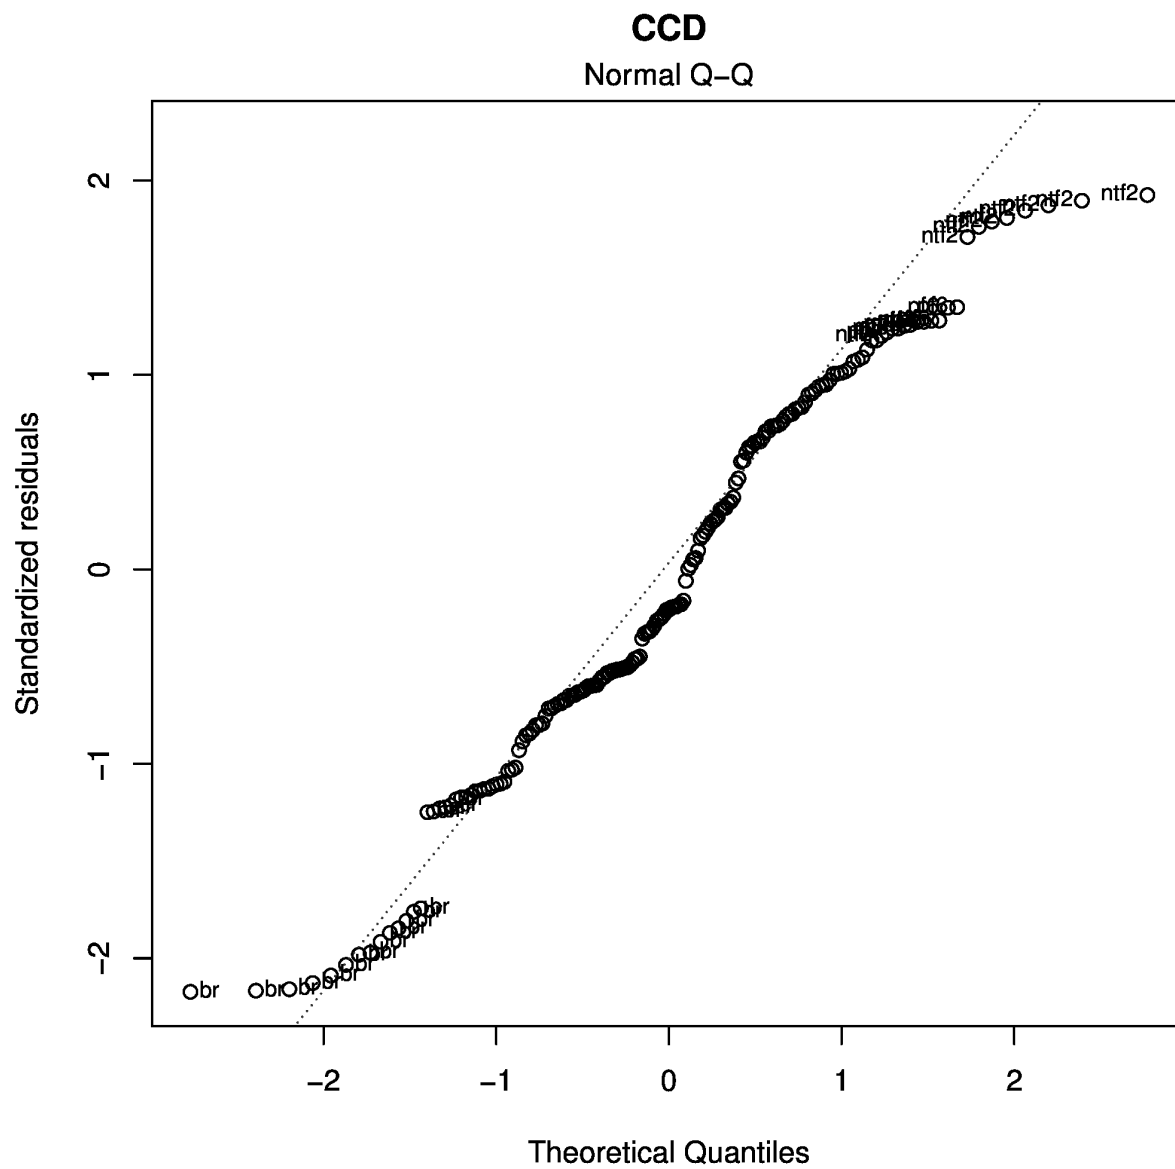

Figure S 94: Q-Q plot











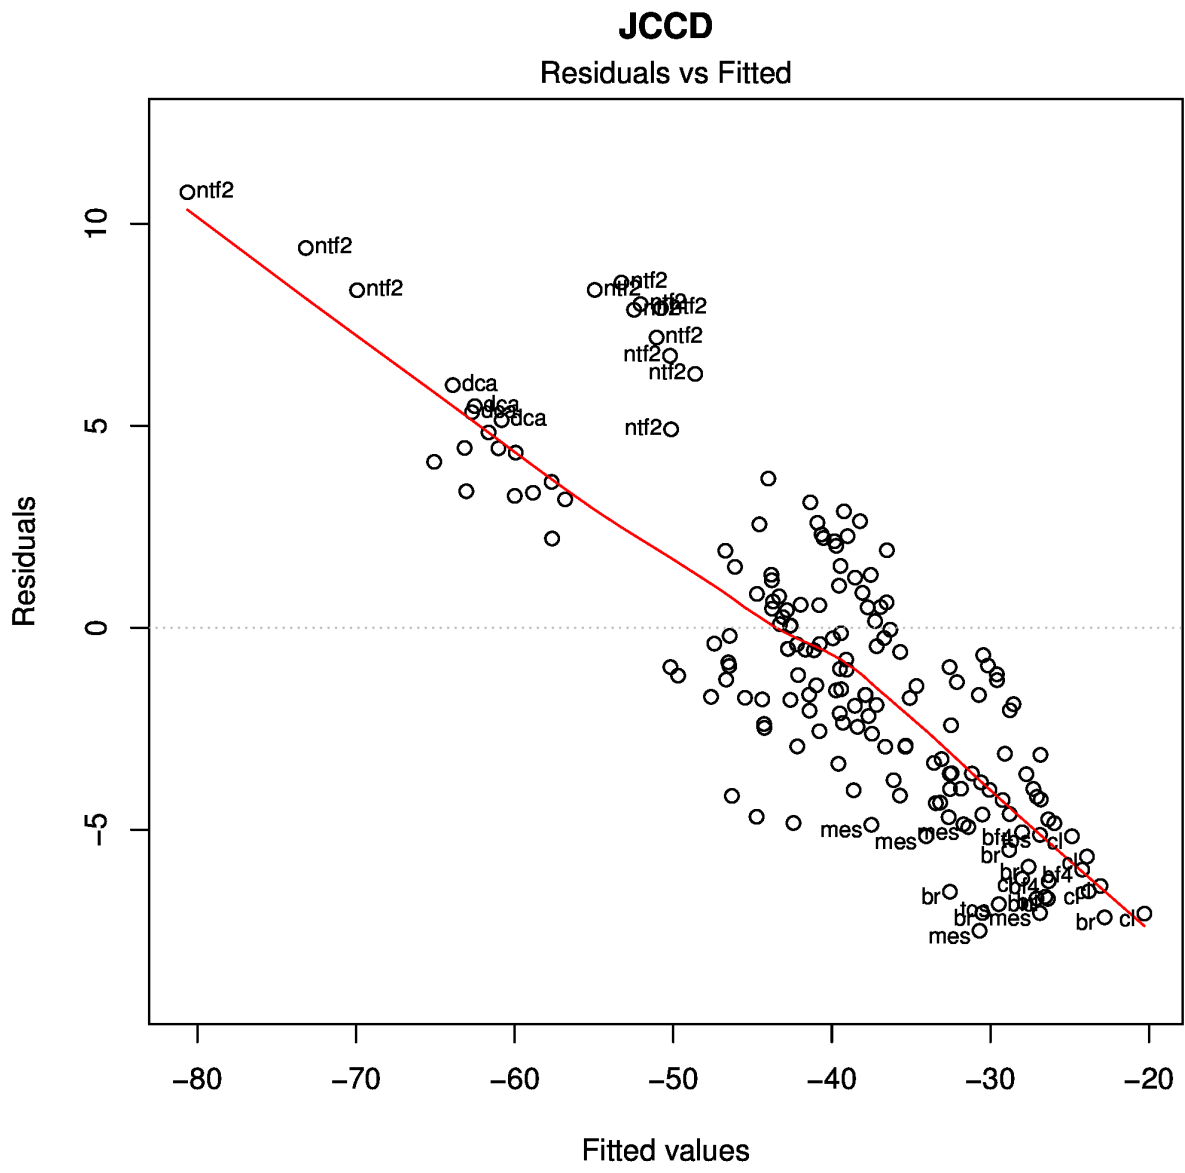

Figure S 97: Residuals vs Fitted values



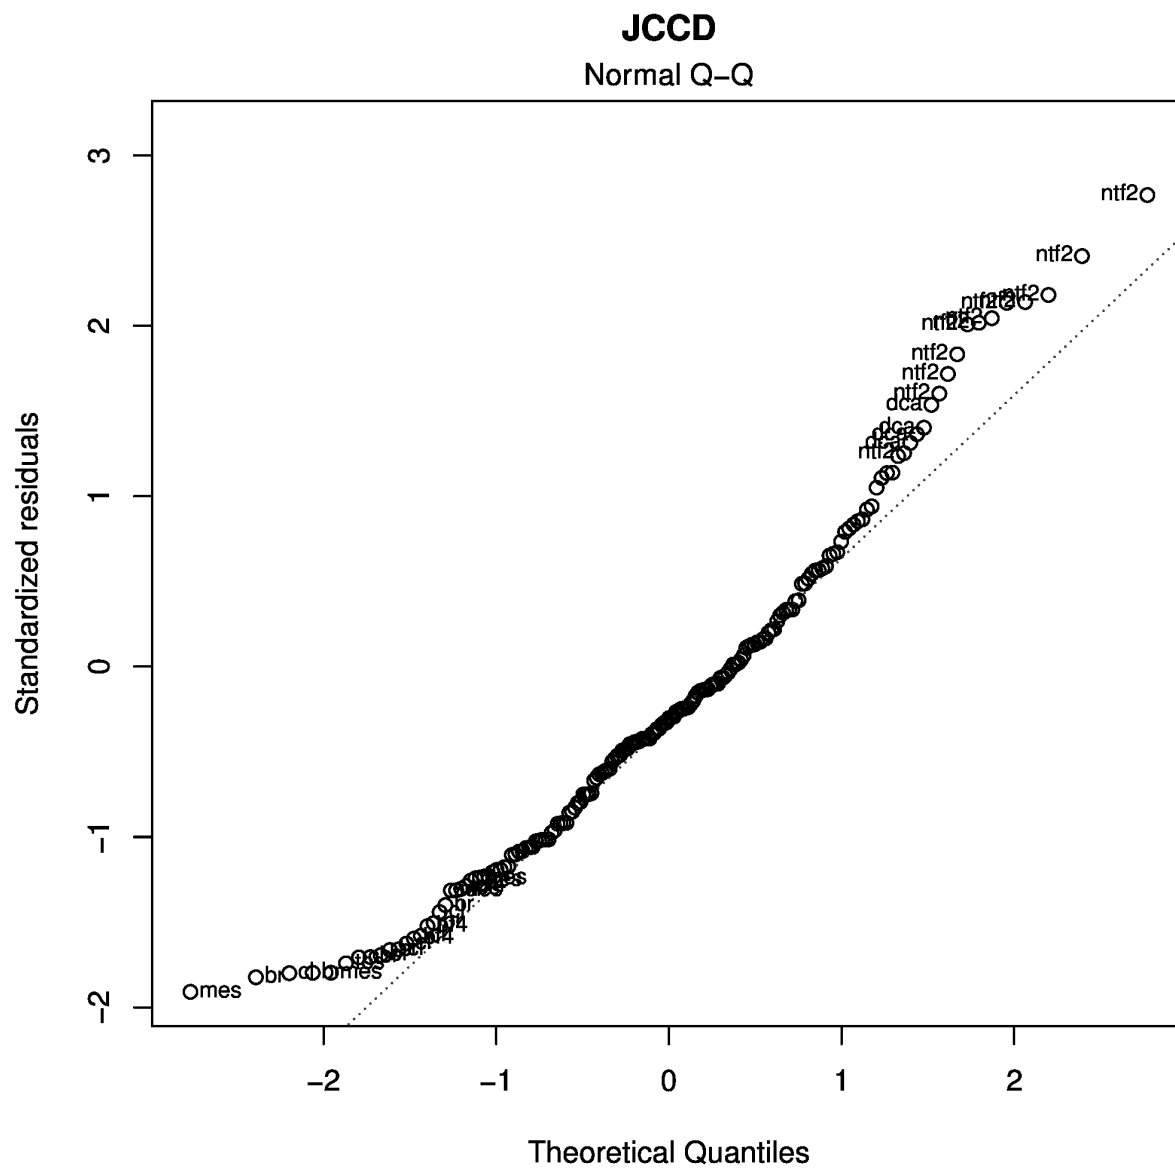

Figure S 98: Q-Q plot



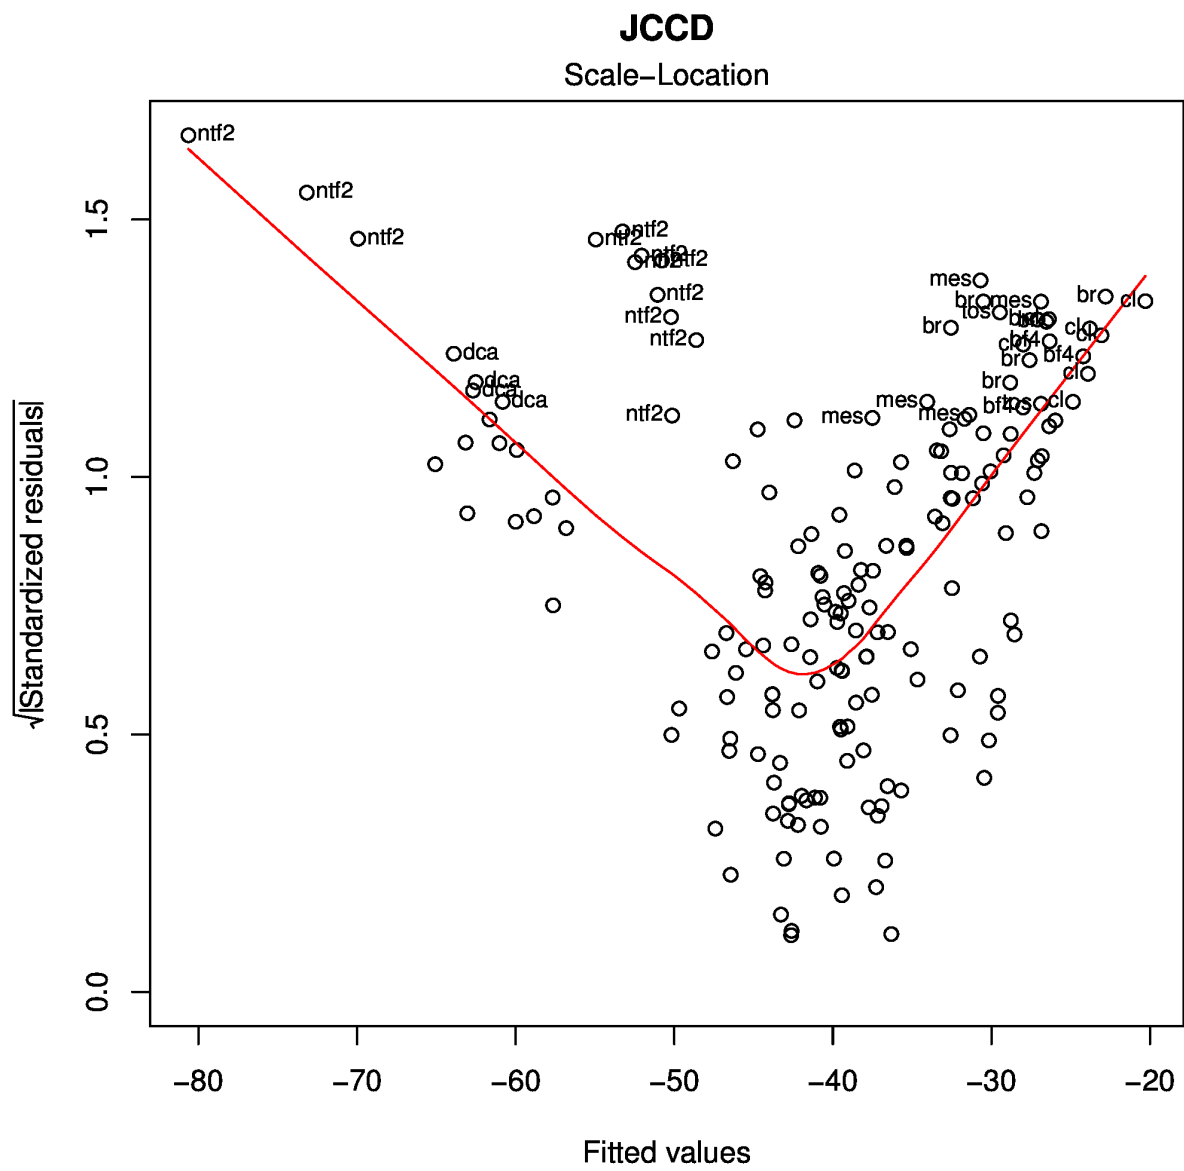

Figure S 99: Scale-Location plot







### 3.2.7 ACCD basis set

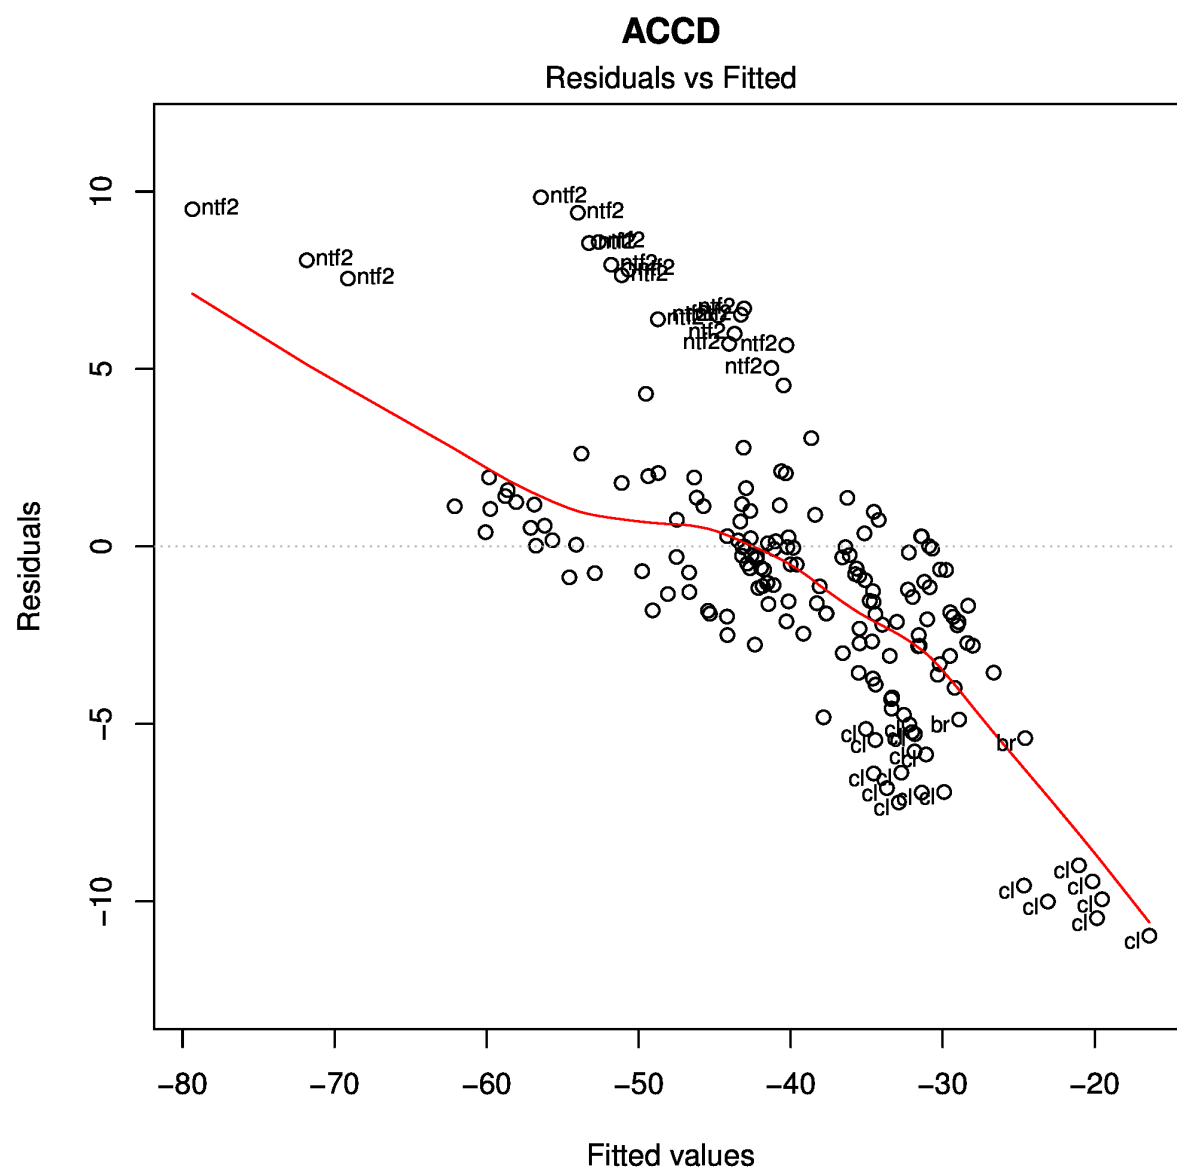

Figure S 101: Residuals vs Fitted values



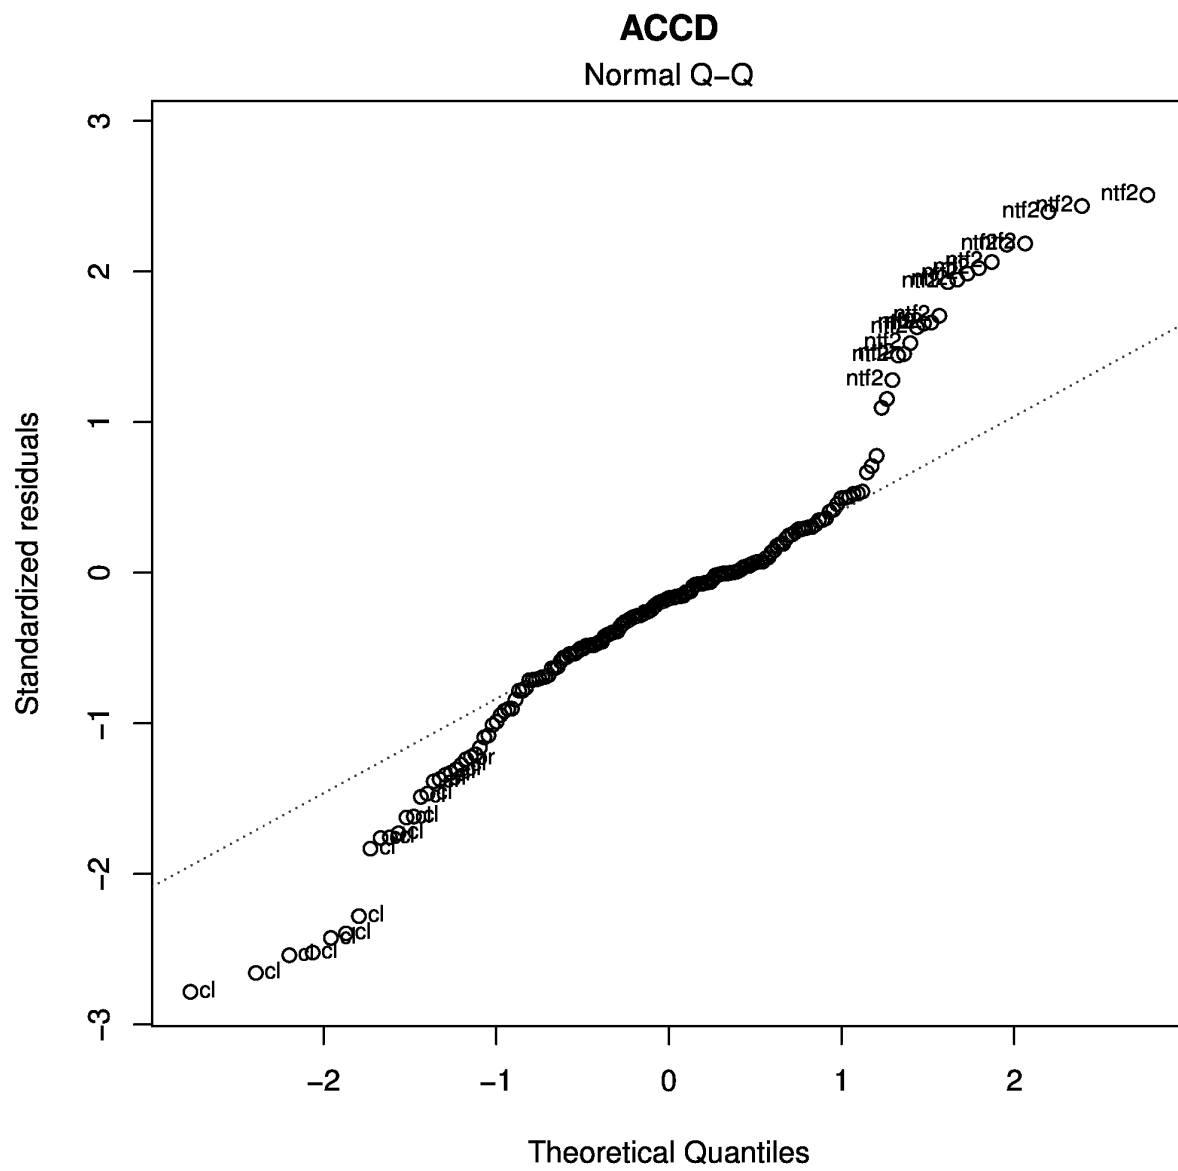

Figure S 102: Q-Q plot



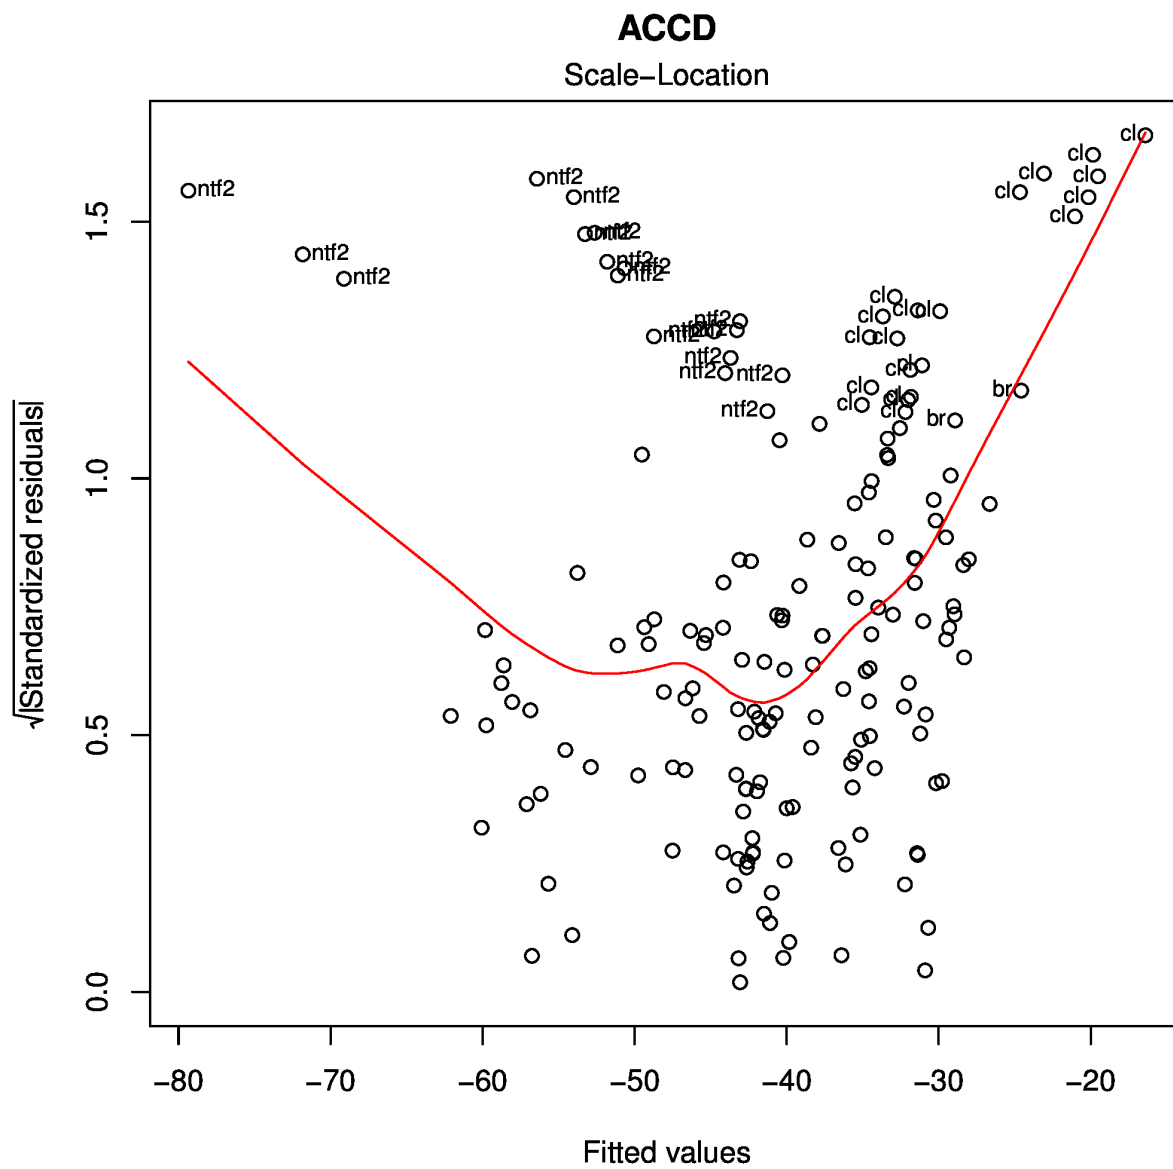

Figure S 103: Scale-Location plot







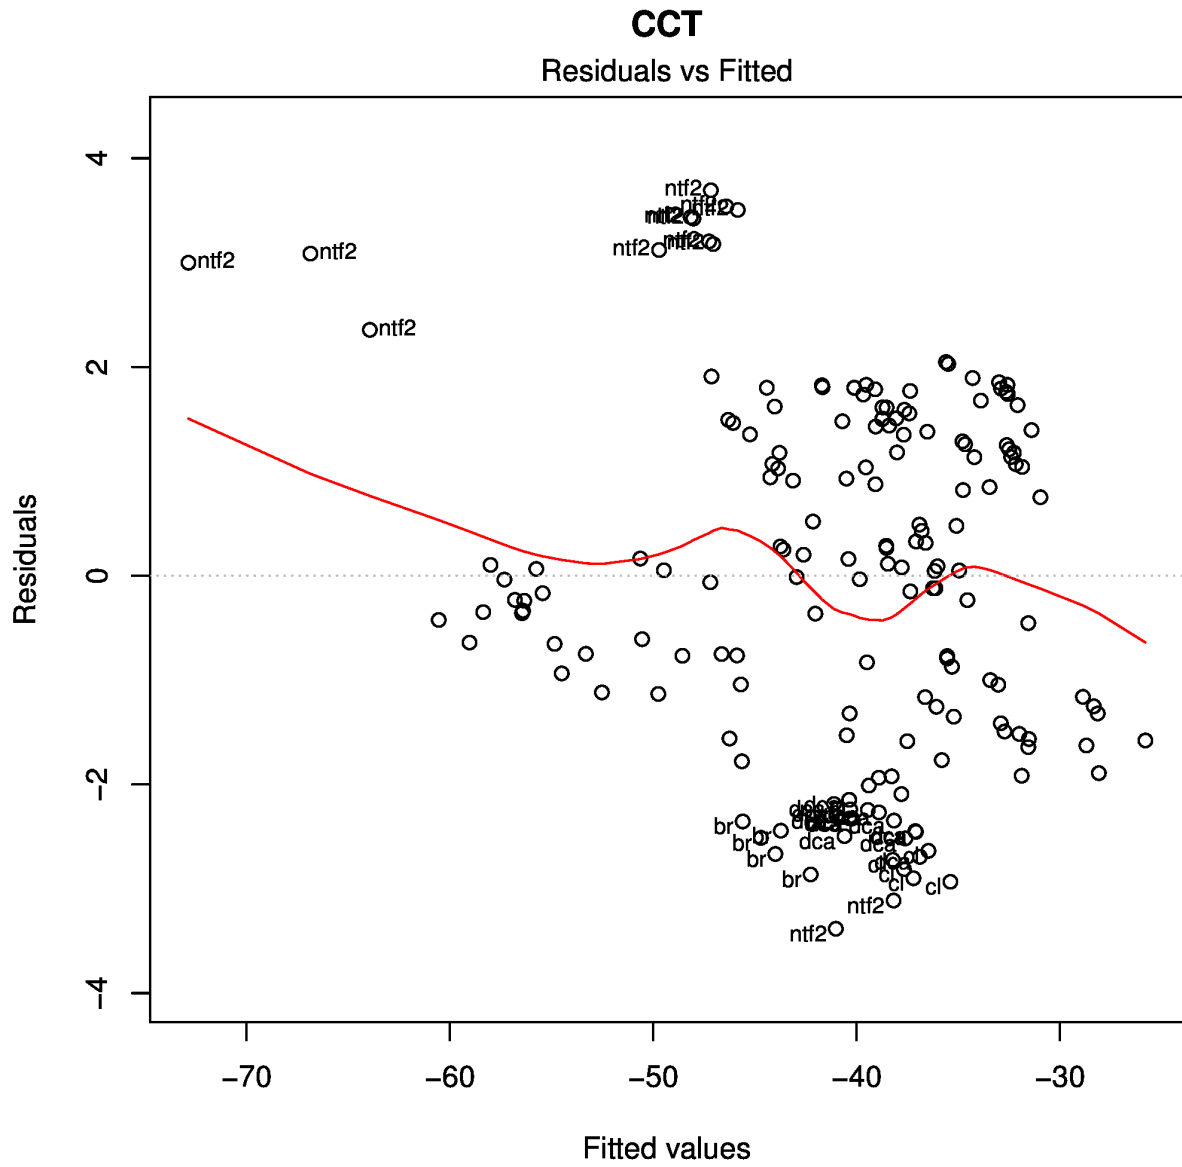

Figure S 105: Residuals vs Fitted values



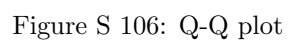



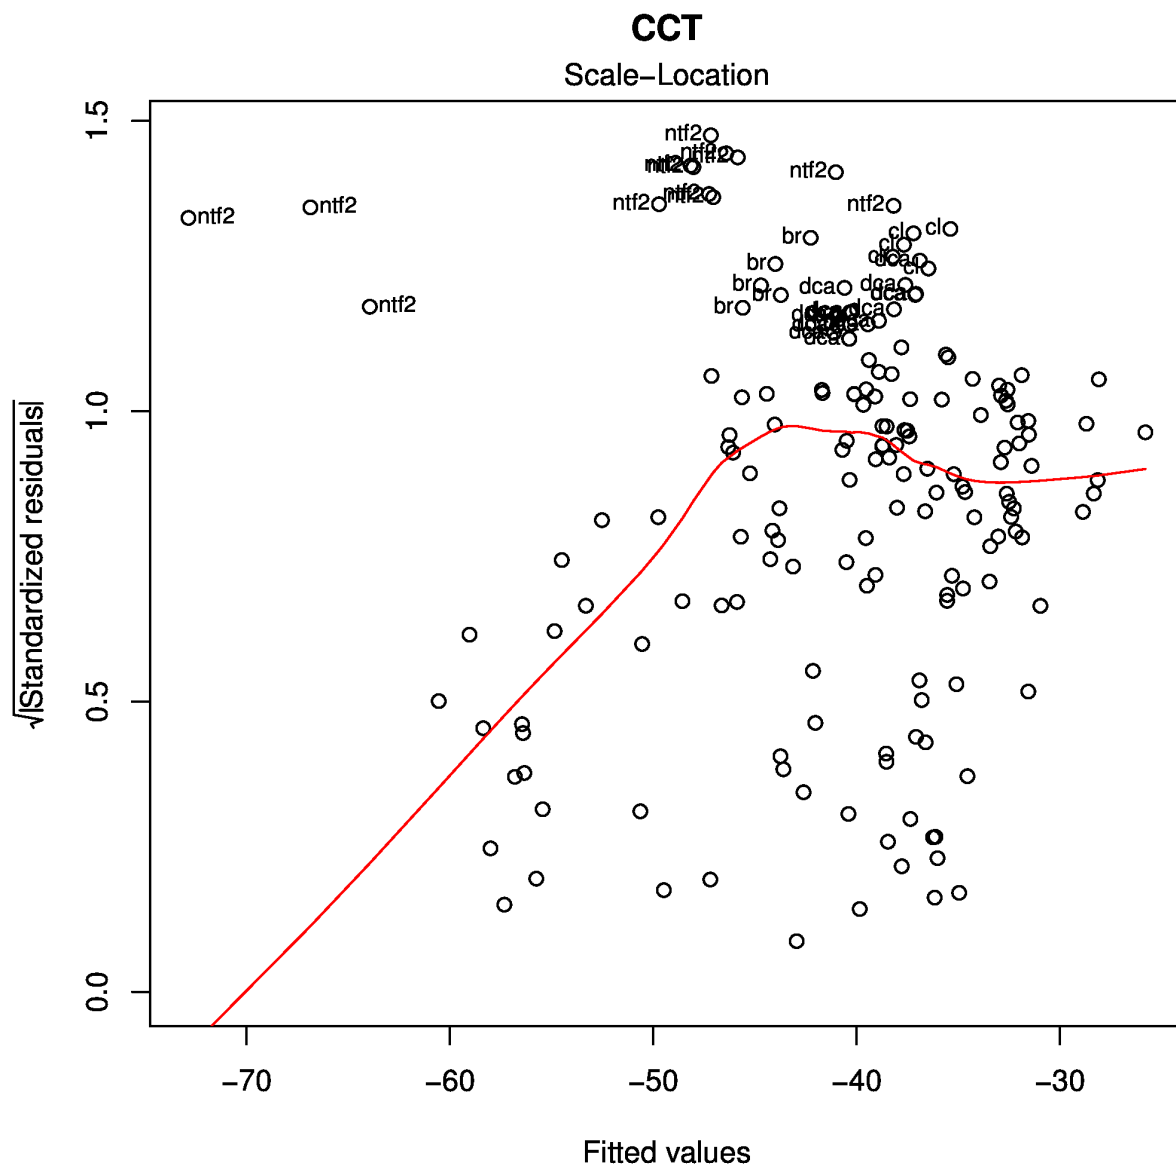

Figure S 107: Scale-Location plot







### 3.2.9 MCCT basis set

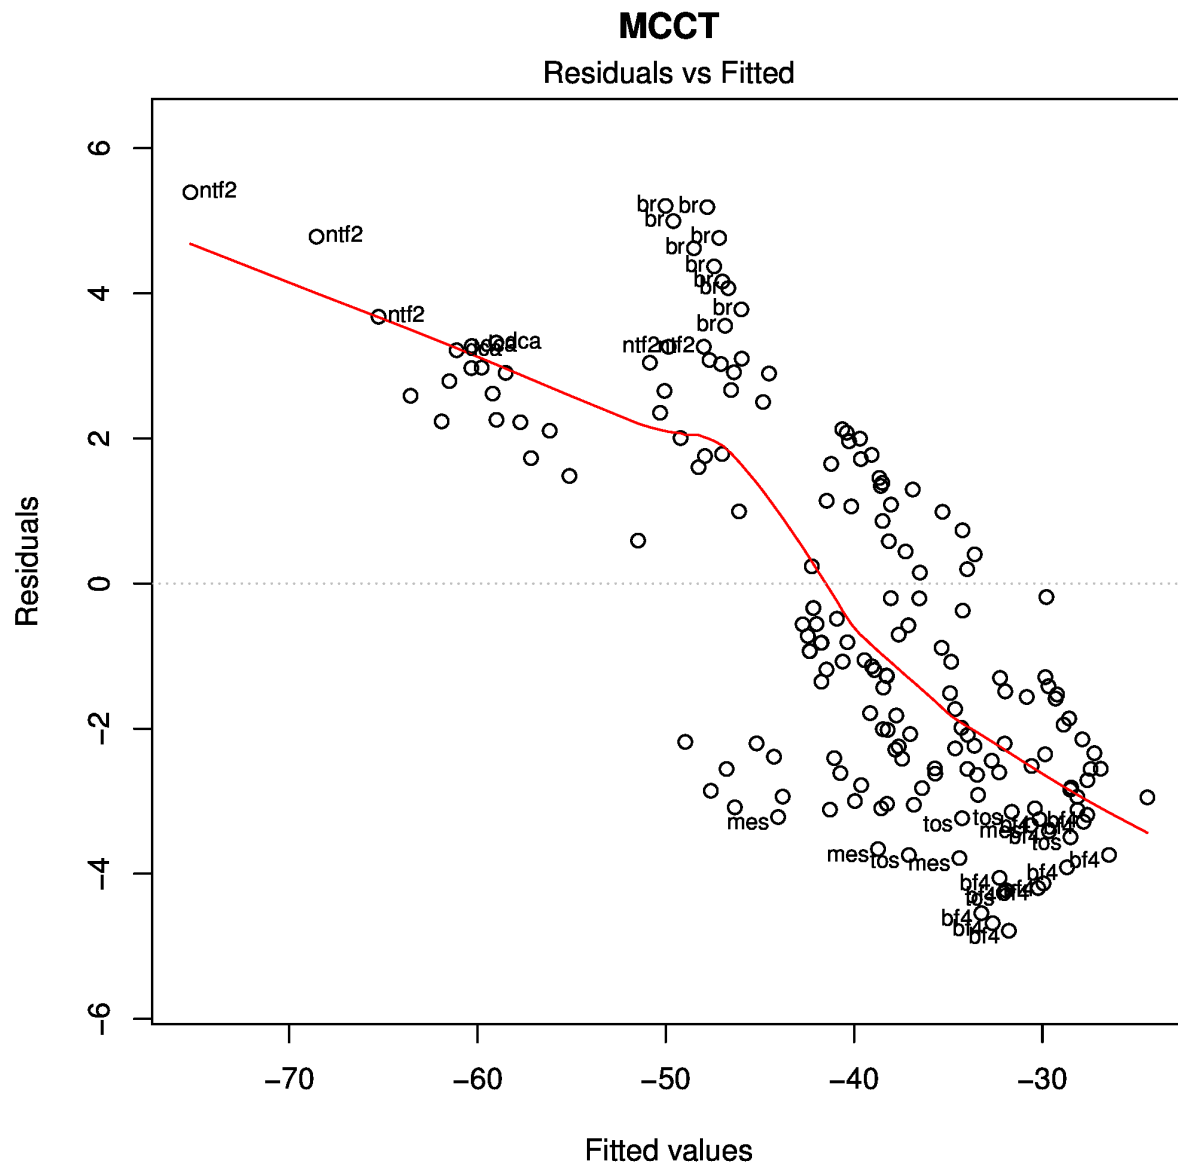

Figure S 109: Residuals vs Fitted values



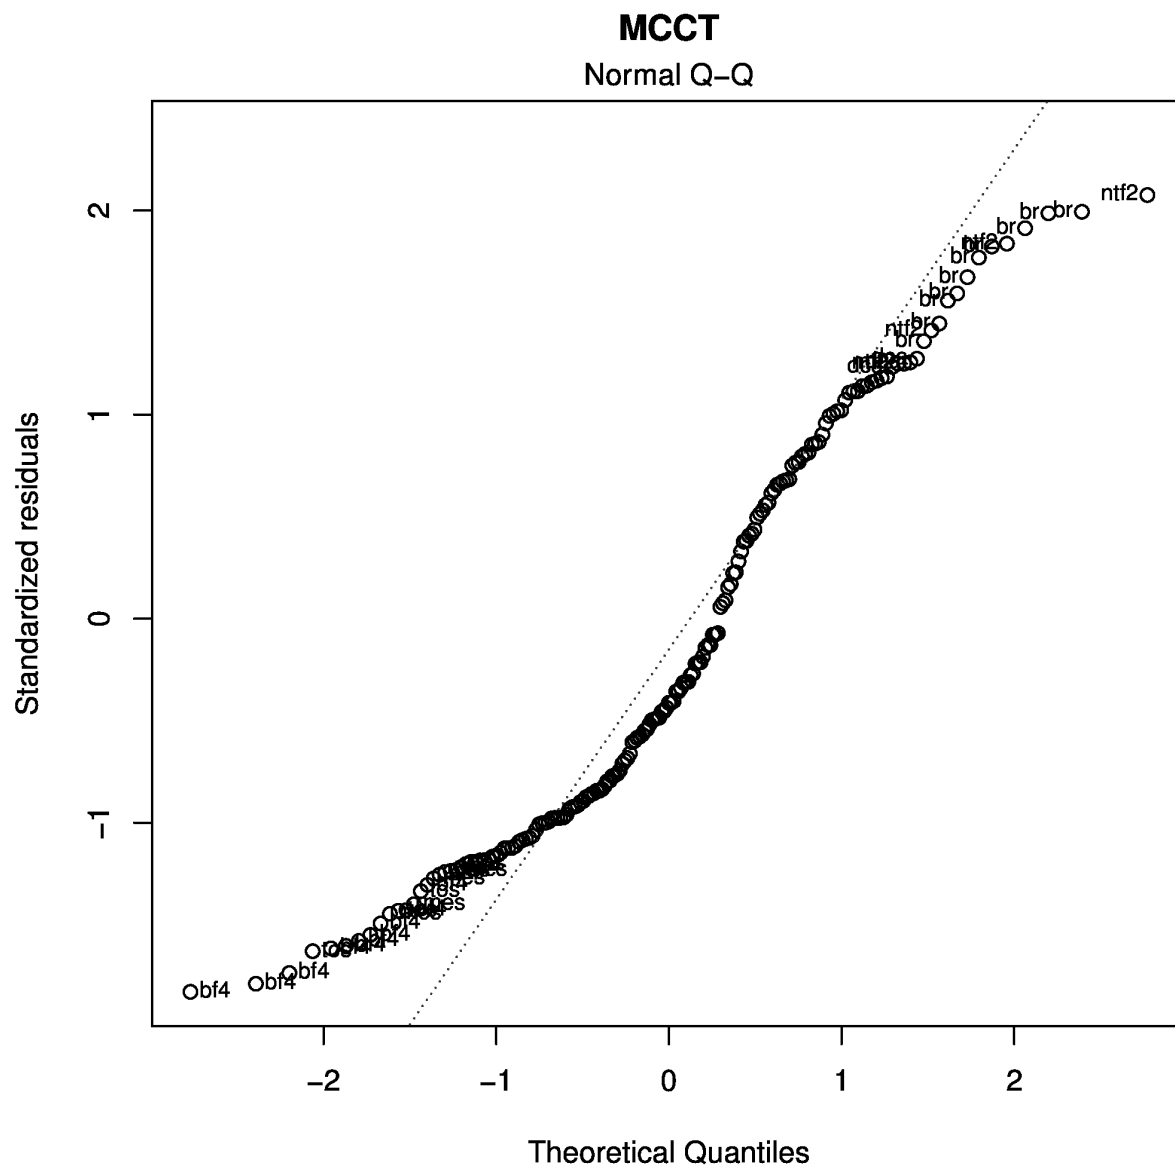

Figure S 110: Q-Q plot







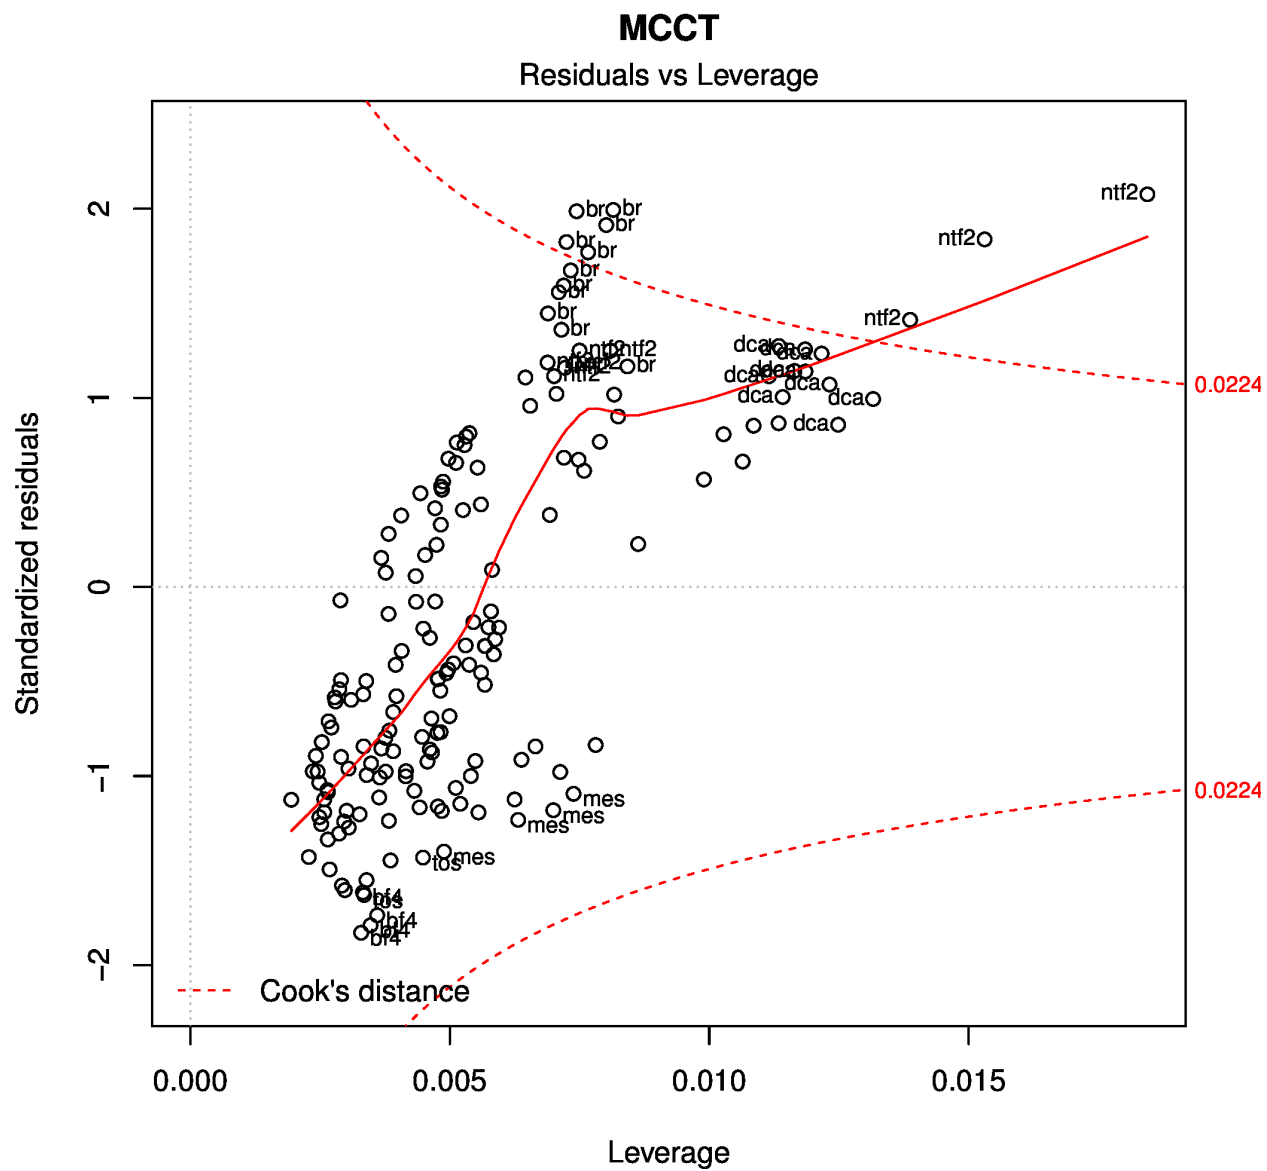

Figure S 112: Residuals vs Leverage plot



### 3.2.10 JCCT basis set

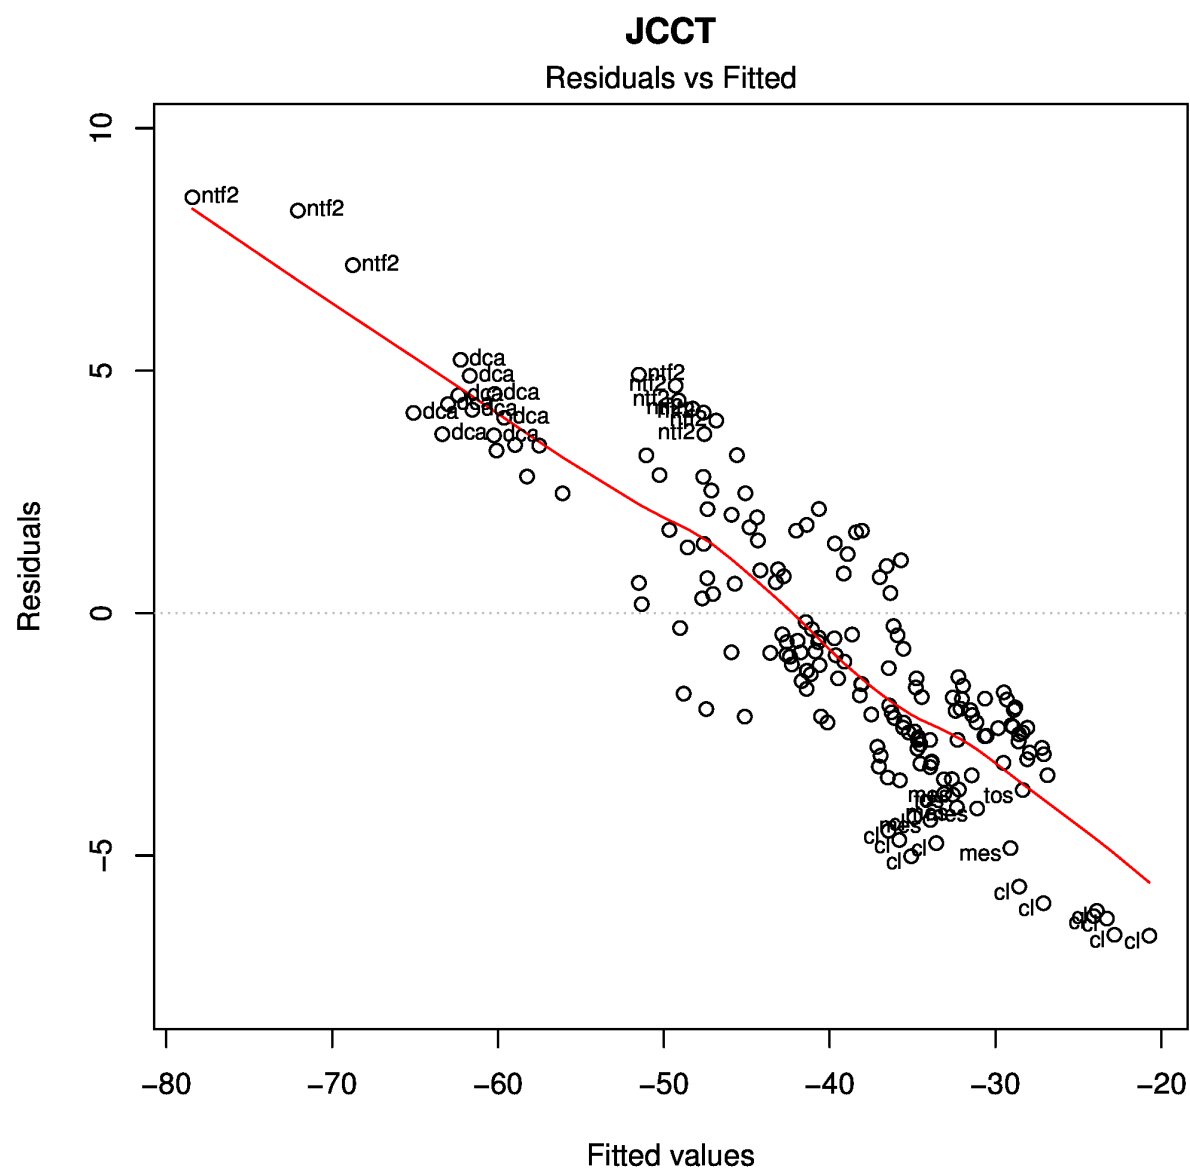

Figure S 113: Residuals vs Fitted values



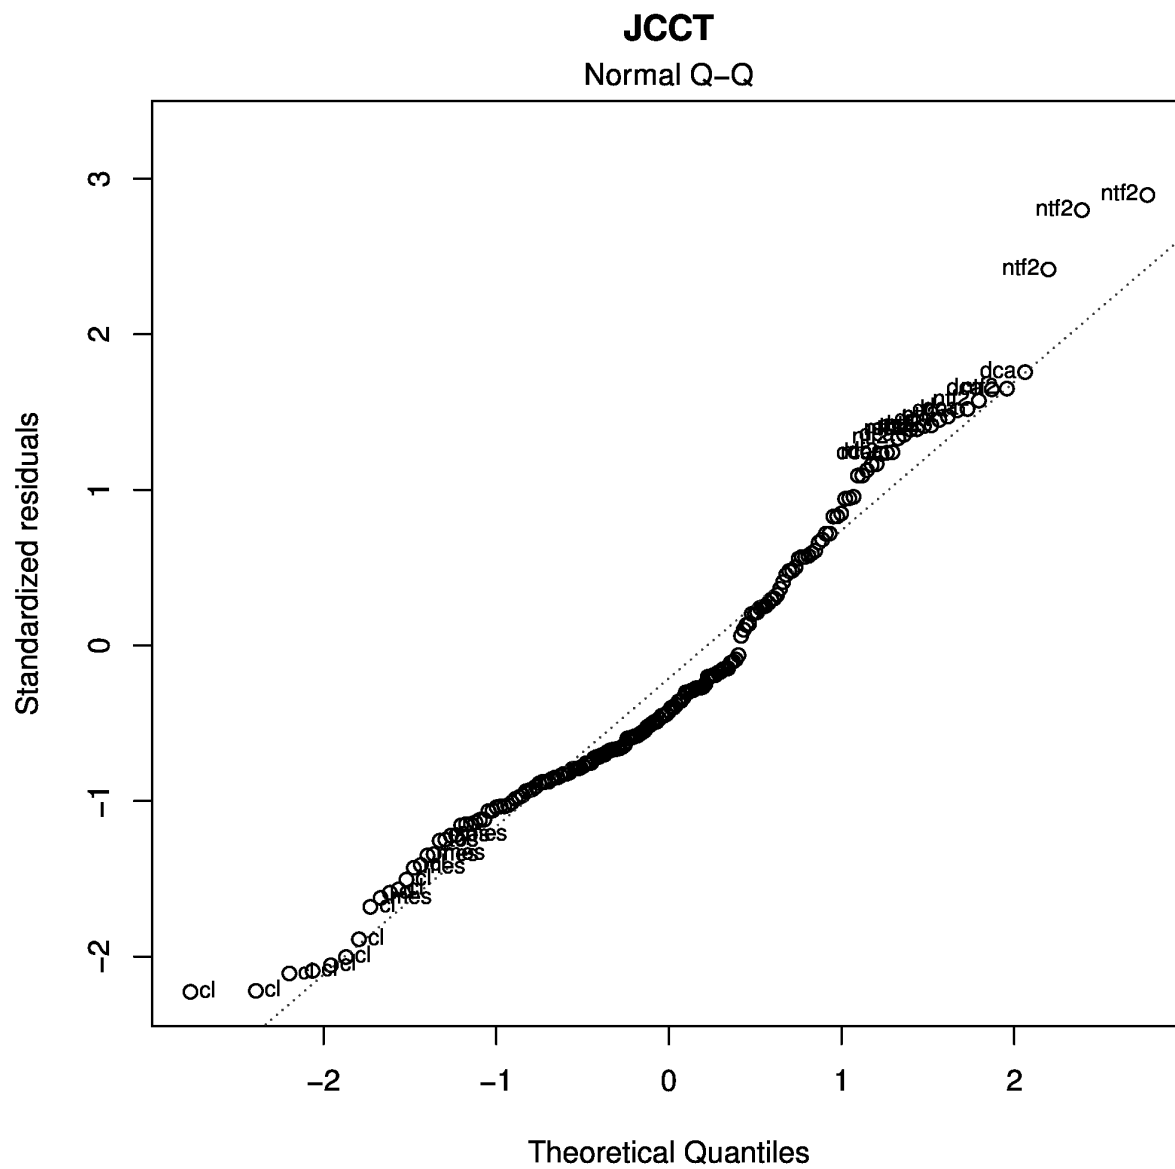

Figure S 114: Q-Q plot



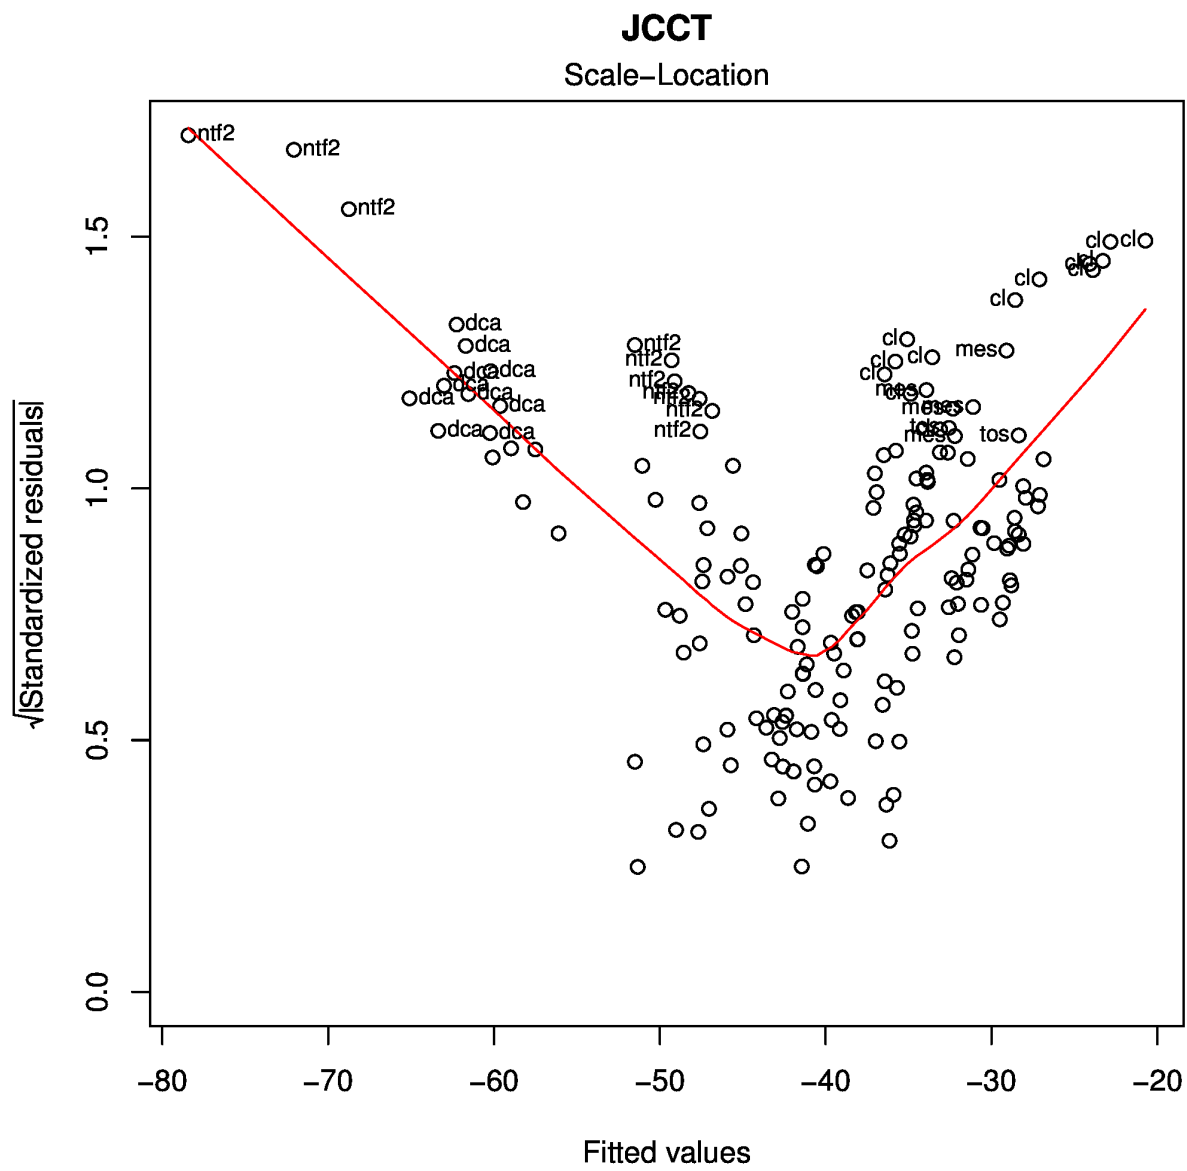

Figure S 115: Scale-Location plot



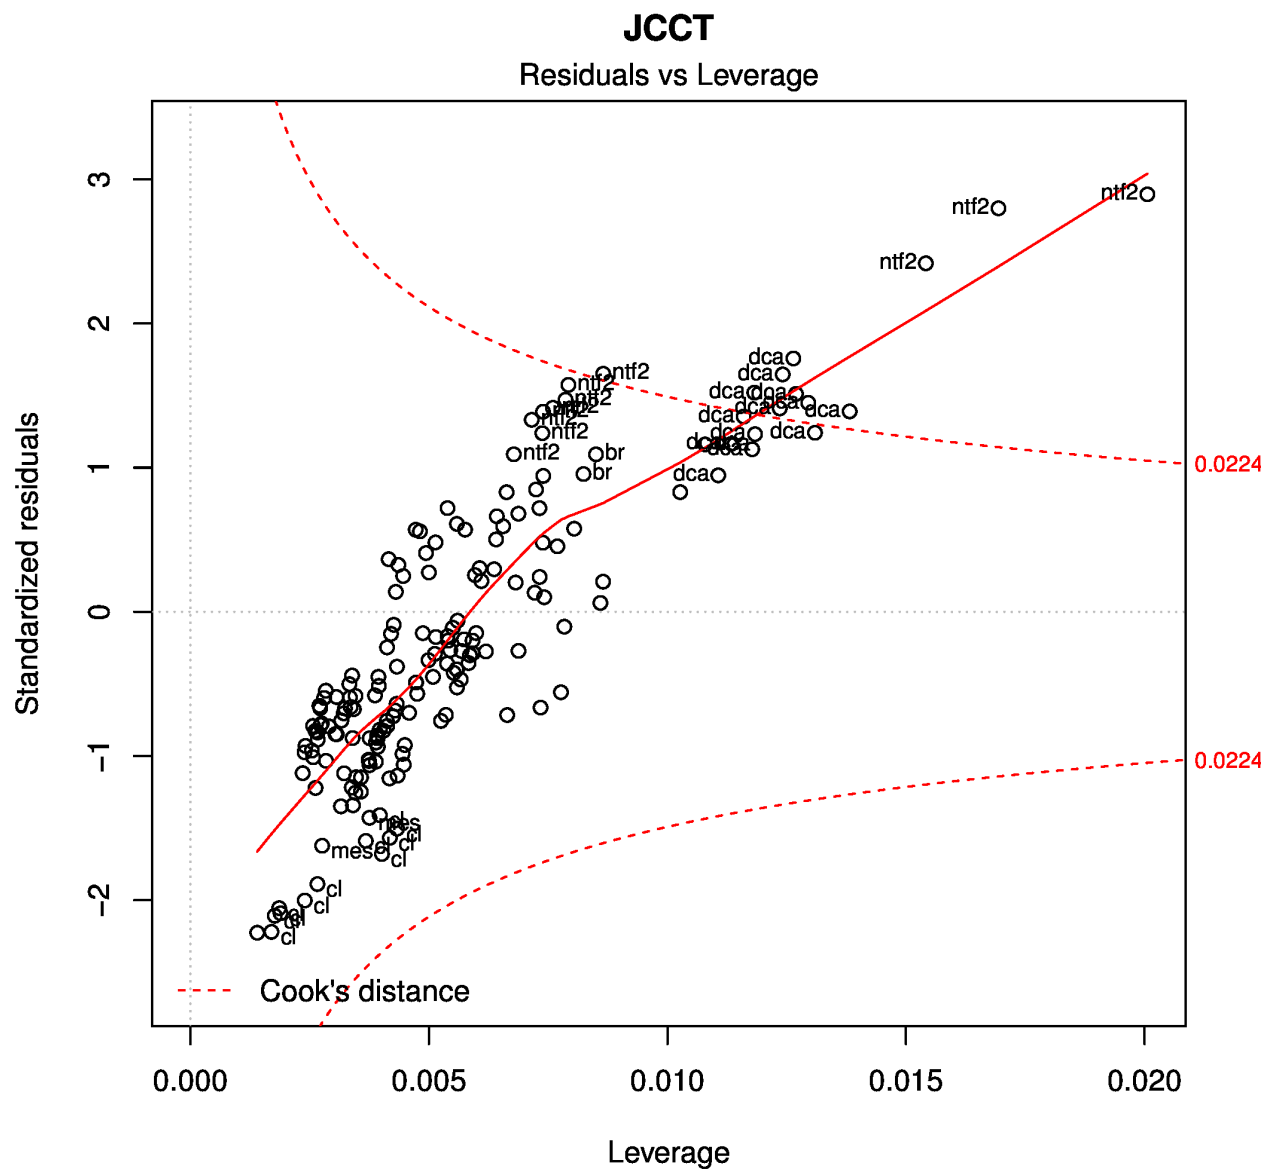

Figure S 116: Residuals vs Leverage plot



### 3.2.11 ACCT basis set

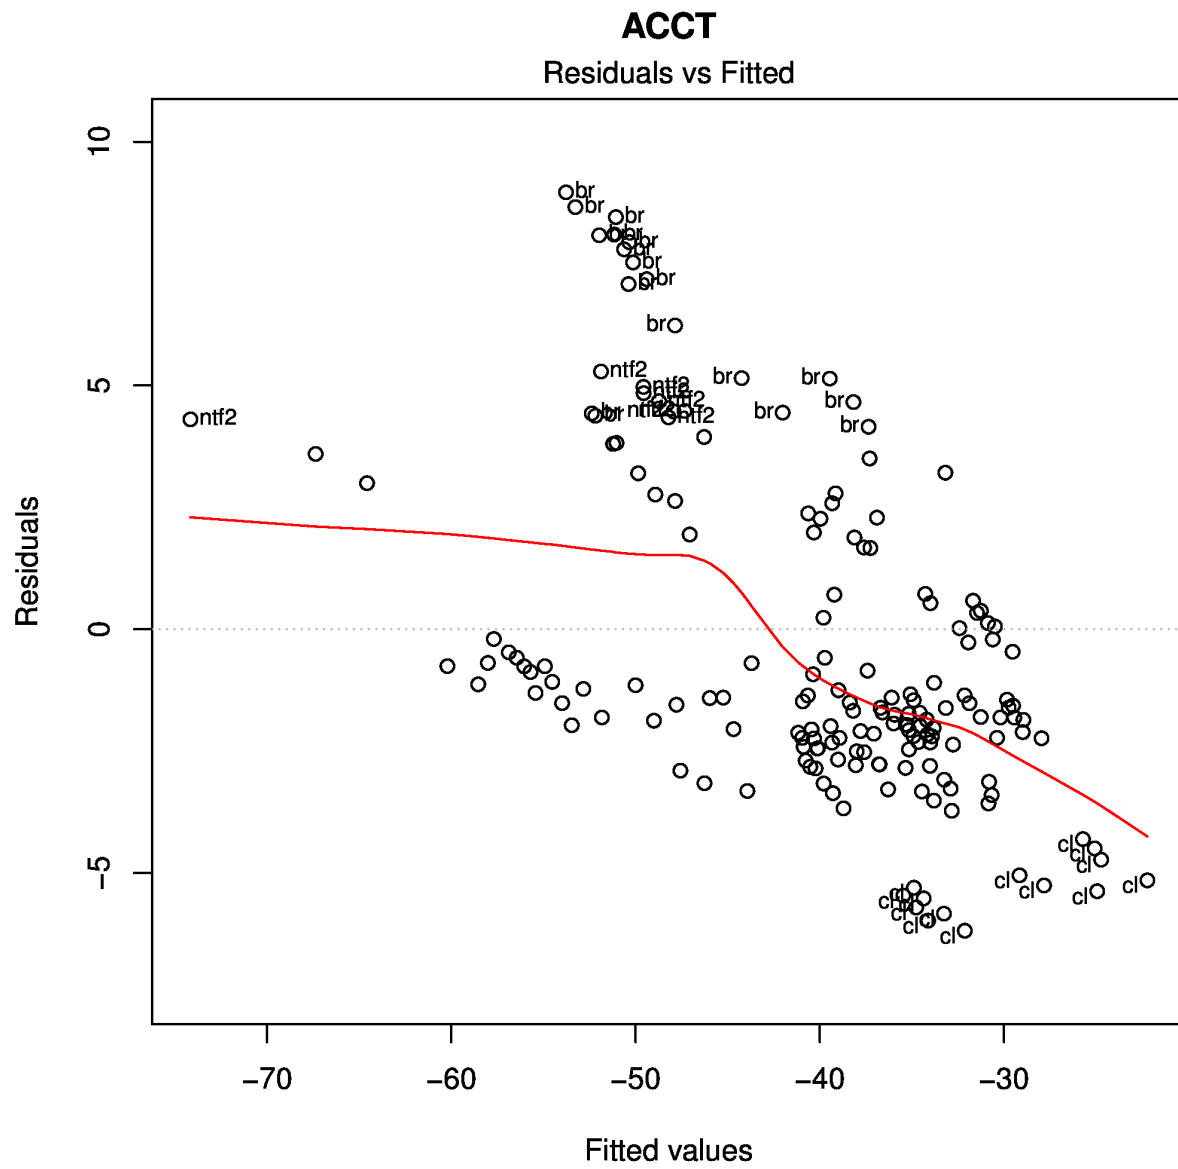

Figure S 117: Residuals vs Fitted values



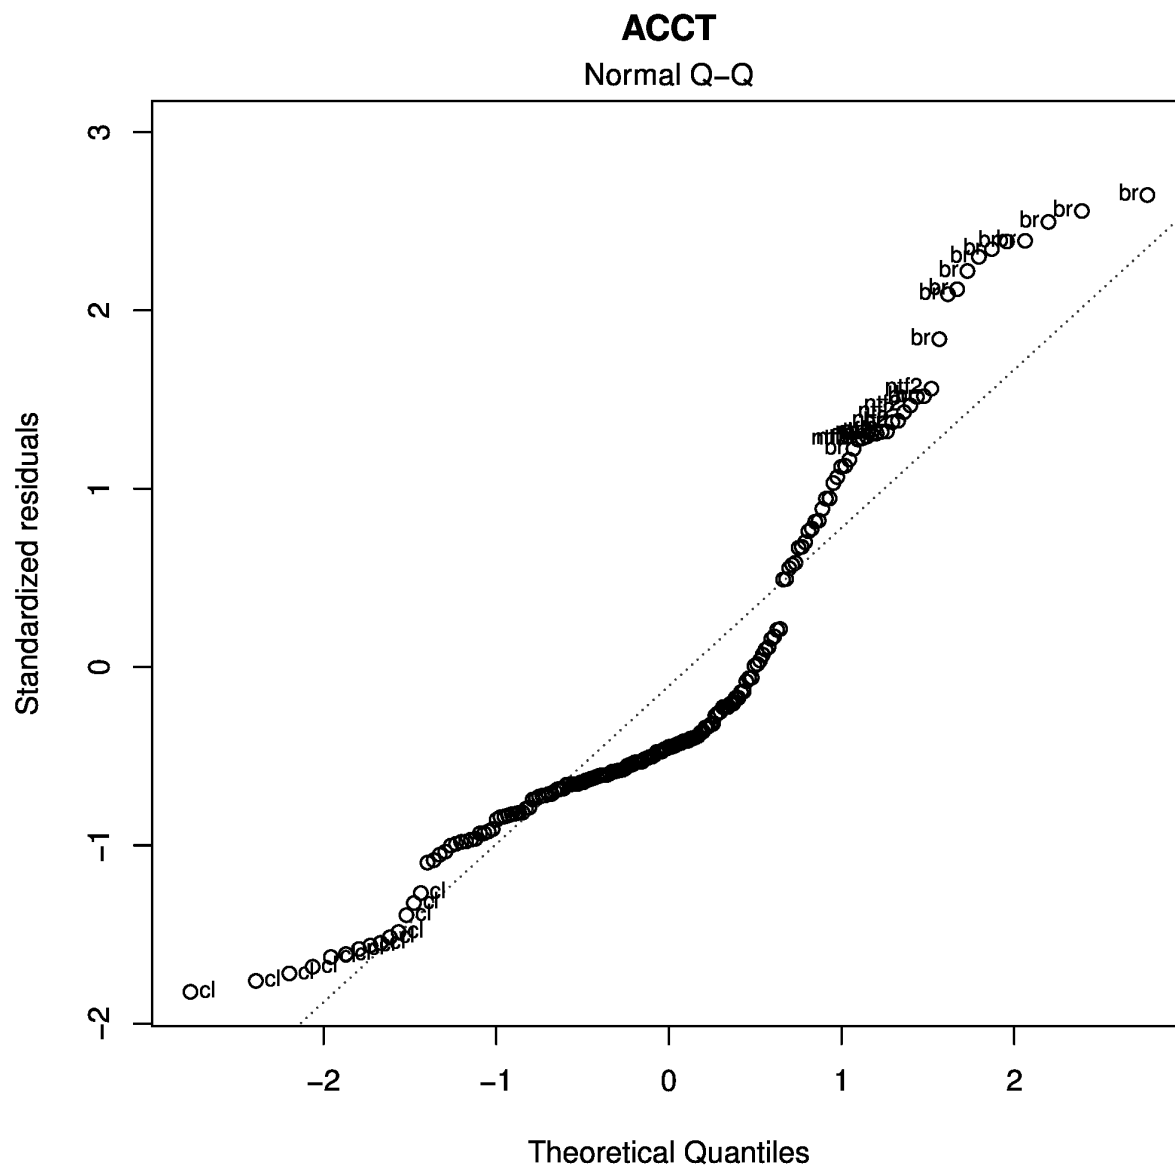

Figure S 118: Q-Q plot



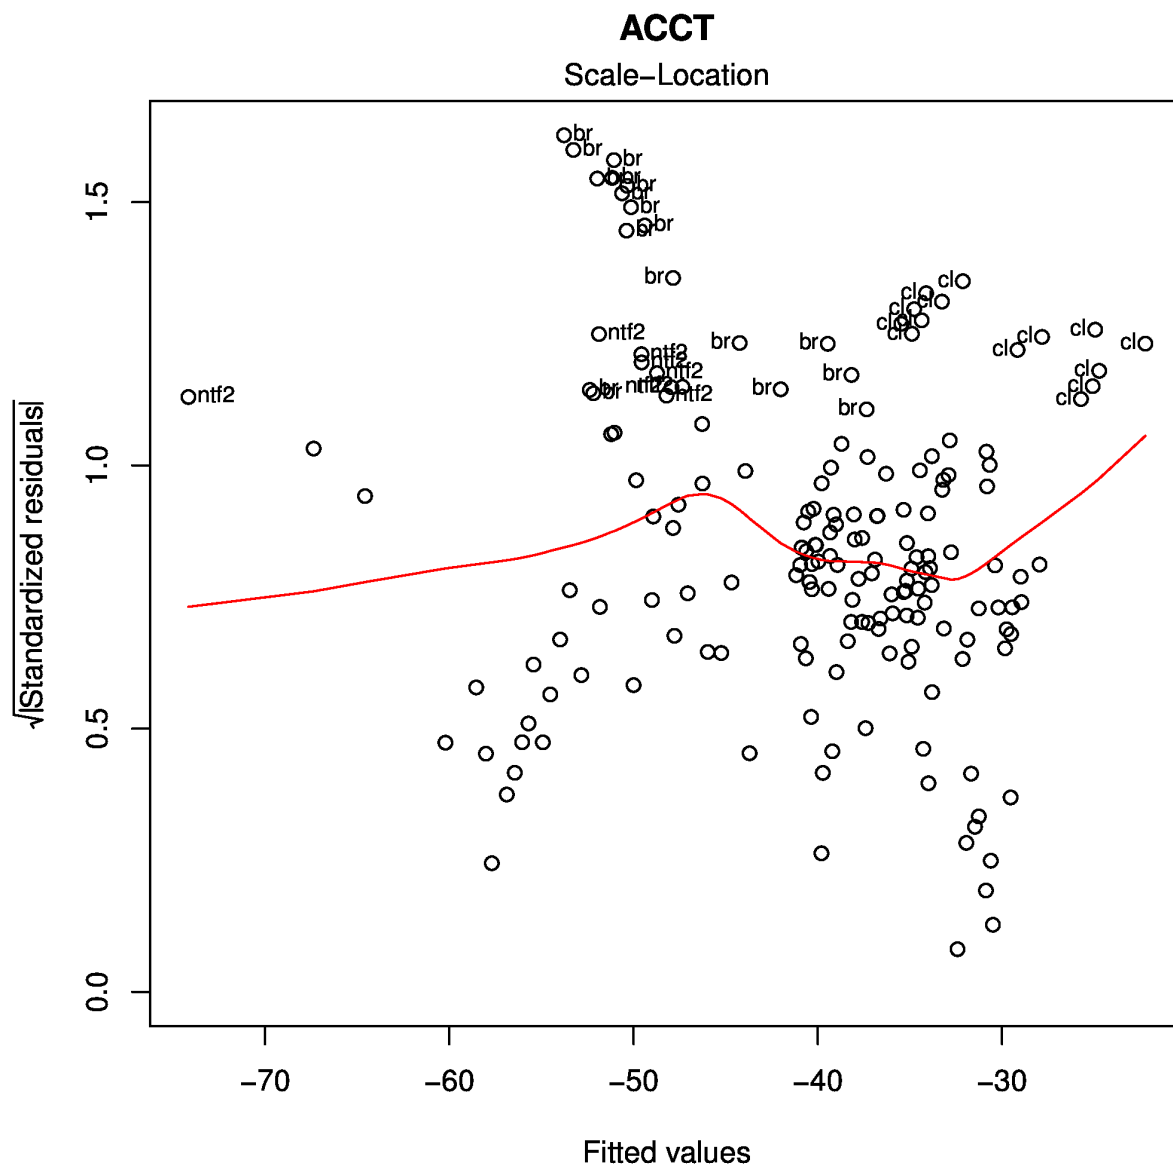

Figure S 119: Scale-Location plot







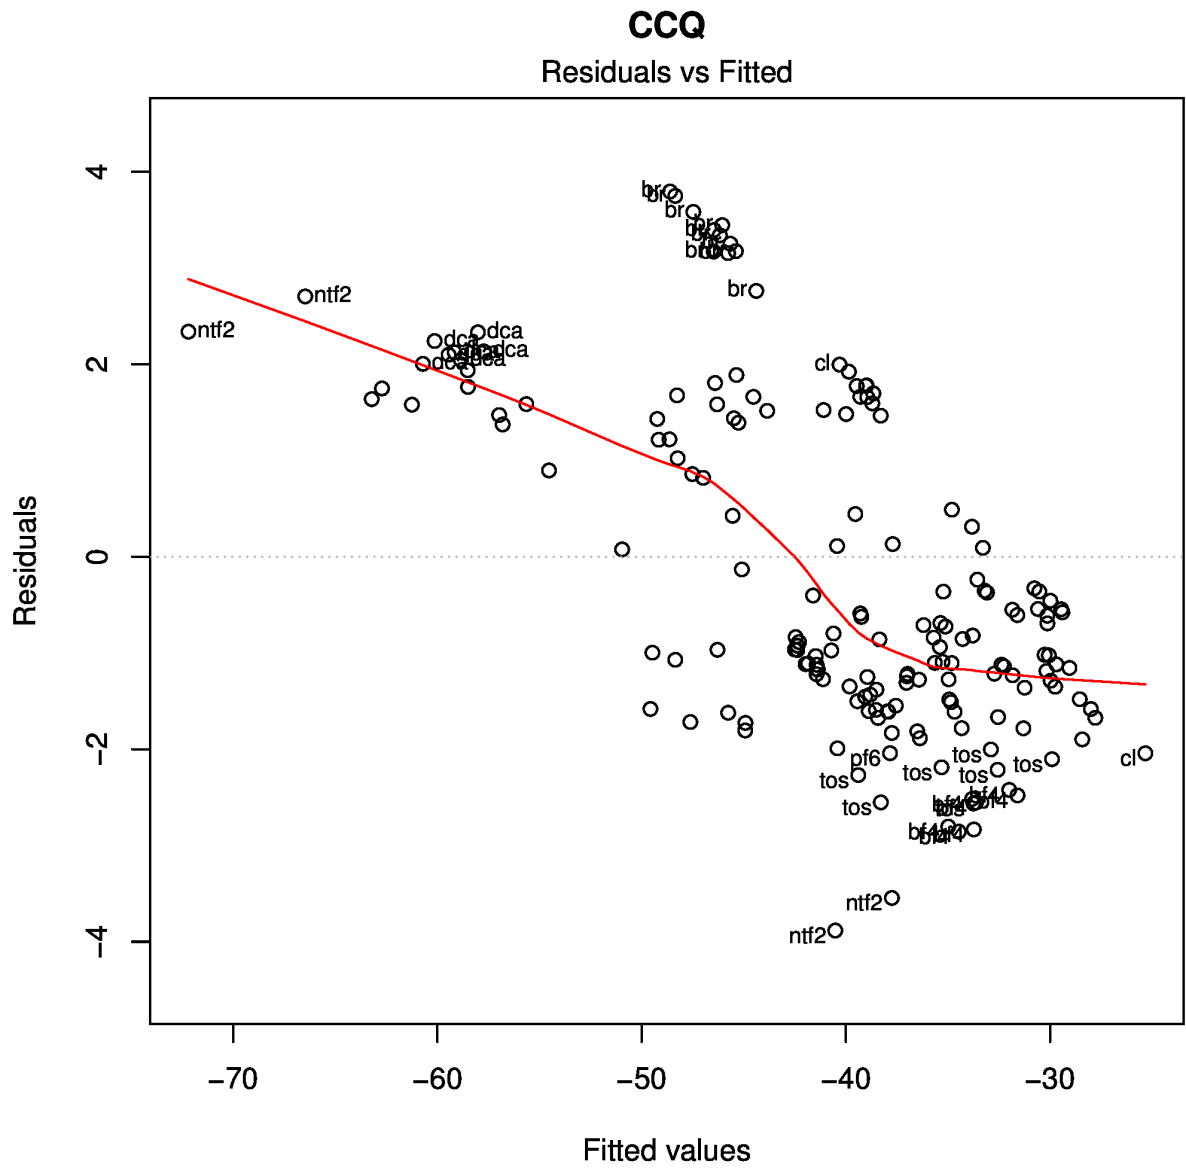

Figure S 121: Residuals vs Fitted values



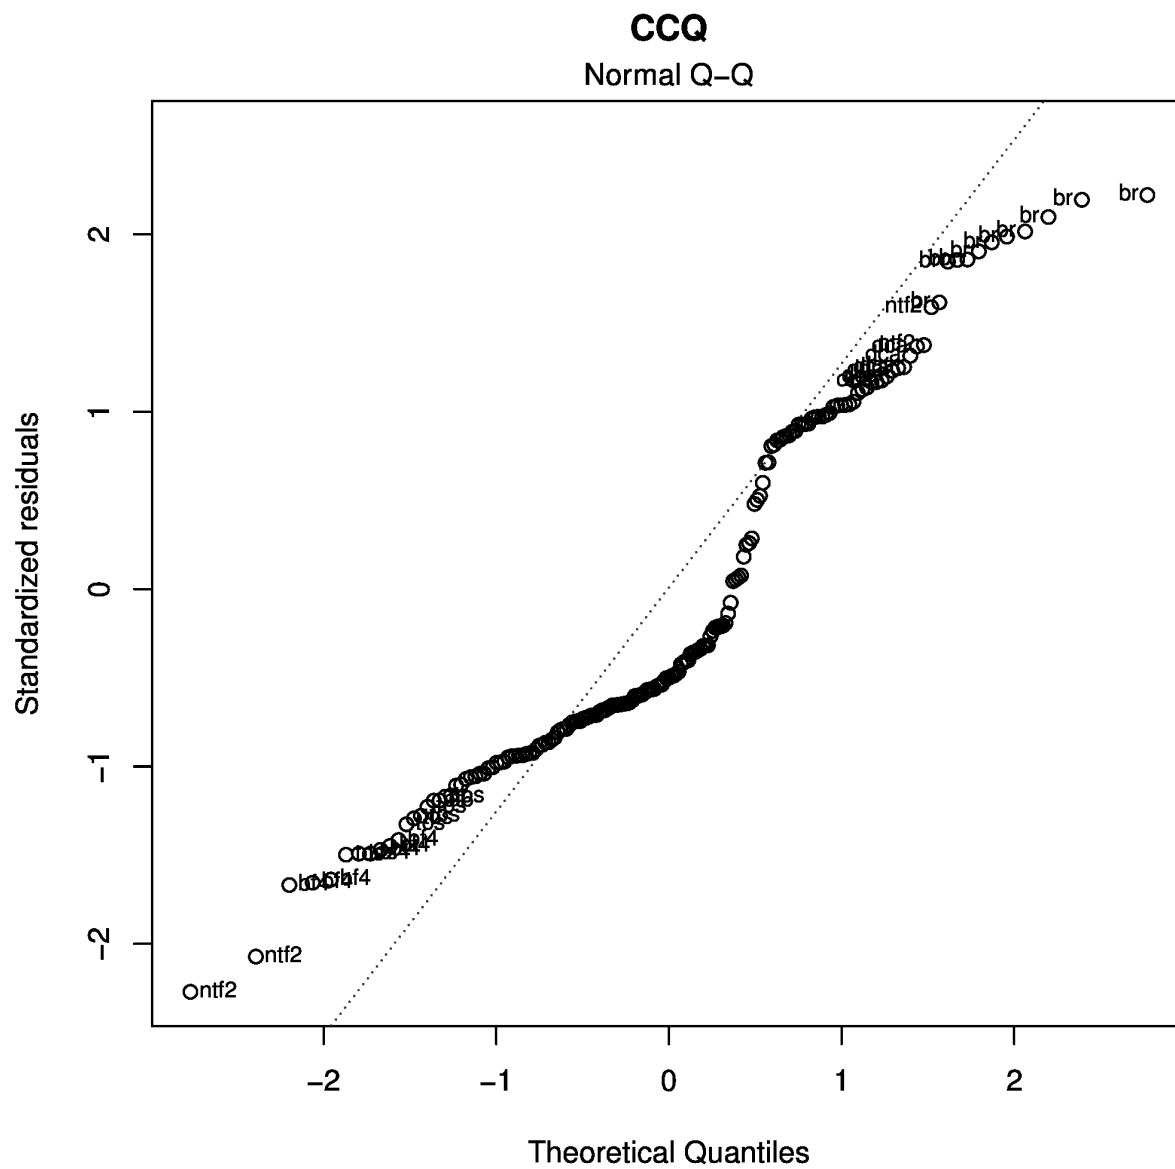

Figure S 122: Q-Q plot







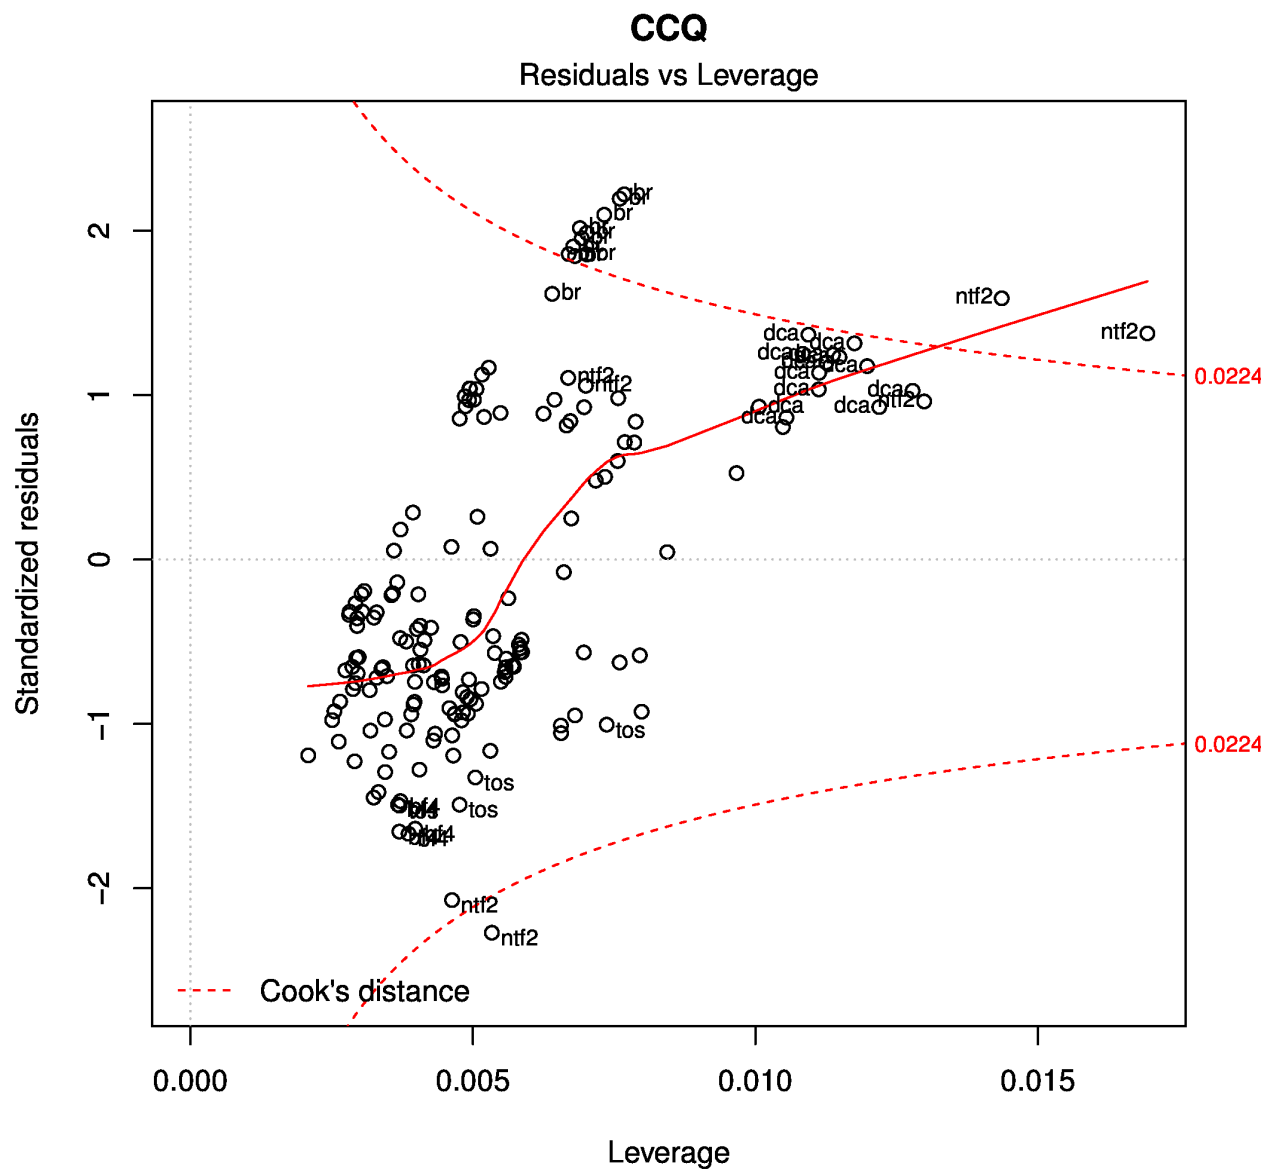

Figure S 124: Residuals vs Leverage plot



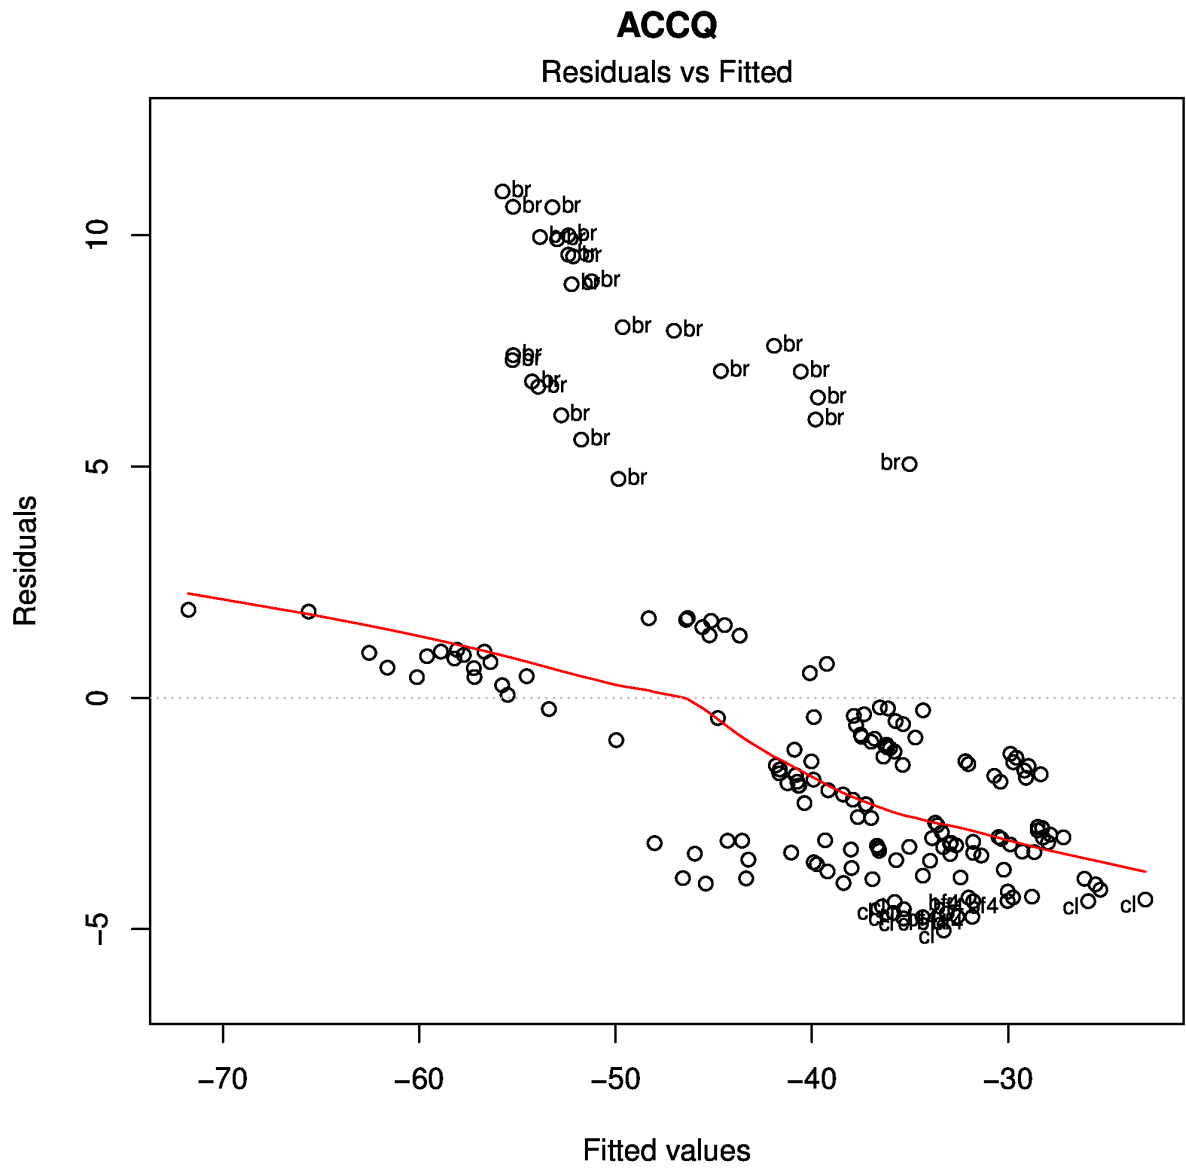

Figure S 125: Residuals vs Fitted values



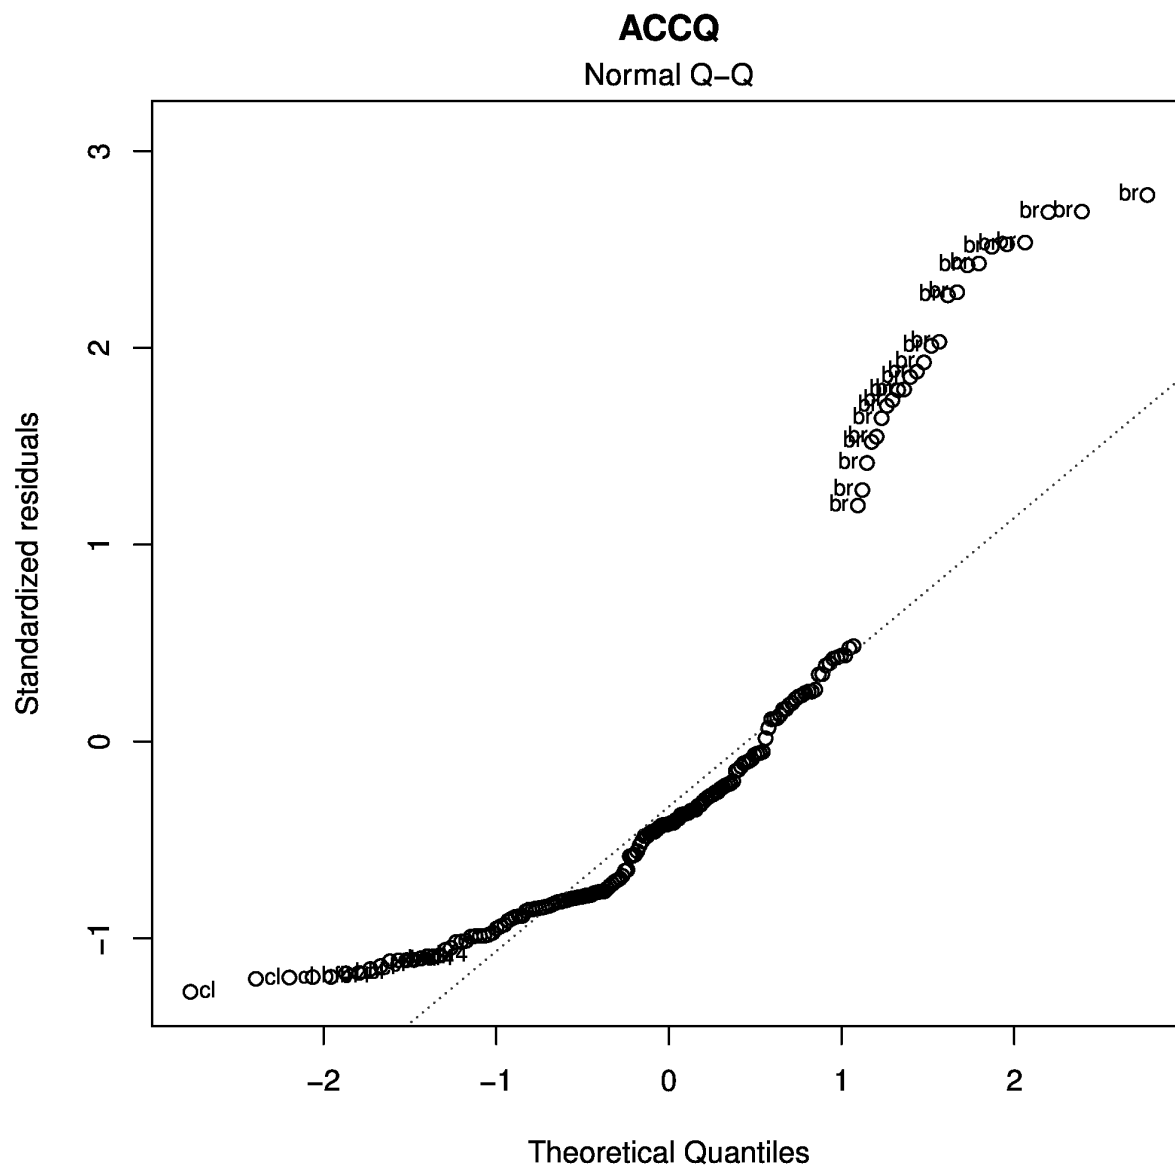

Figure S 126: Q-Q plot



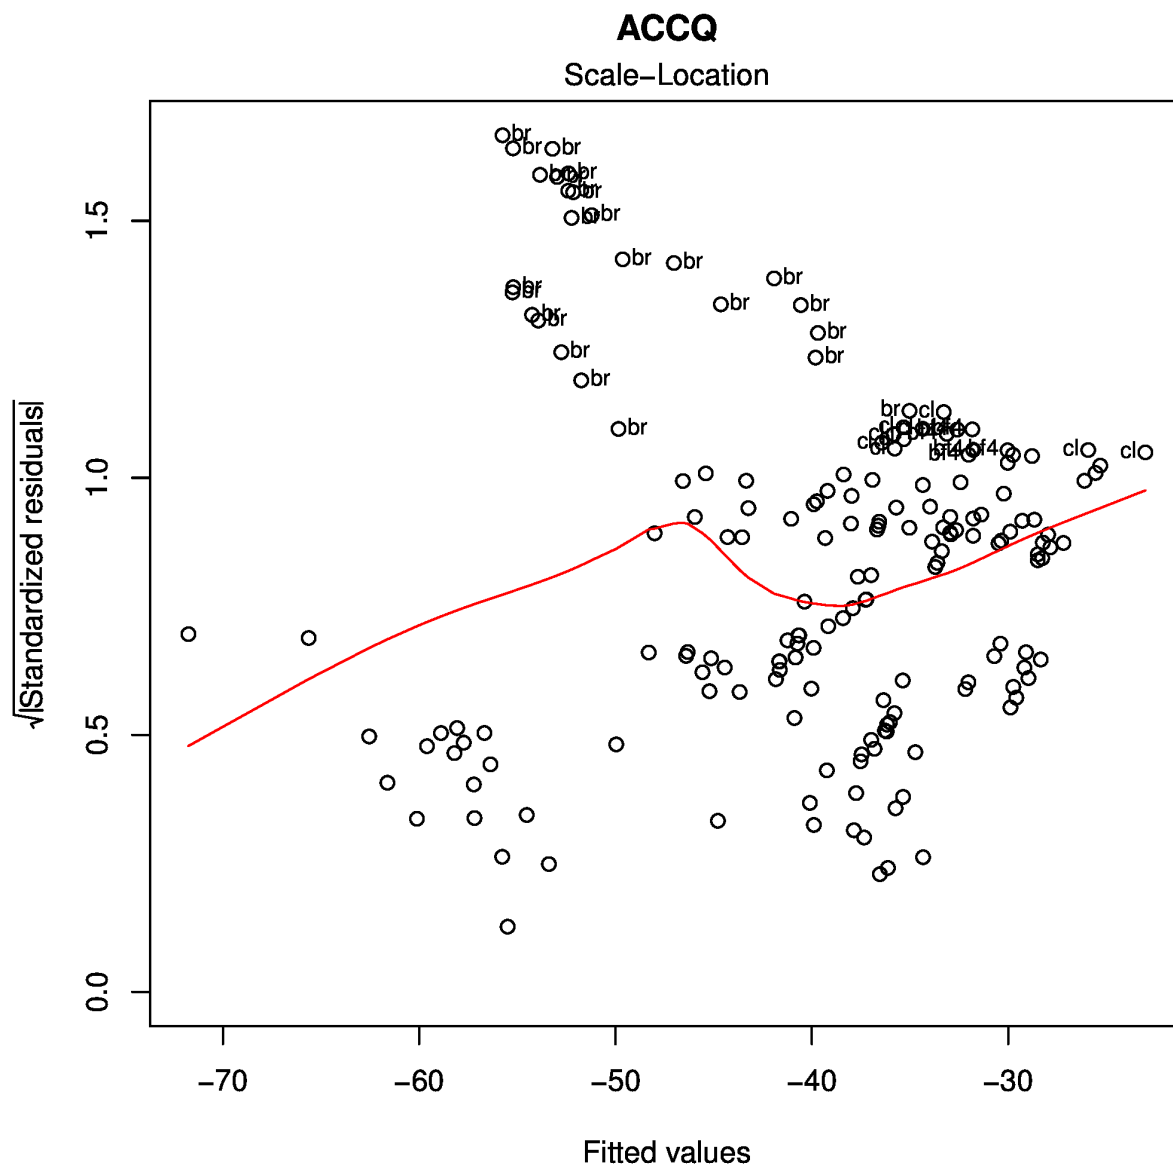

Figure S 127: Scale-Location plot







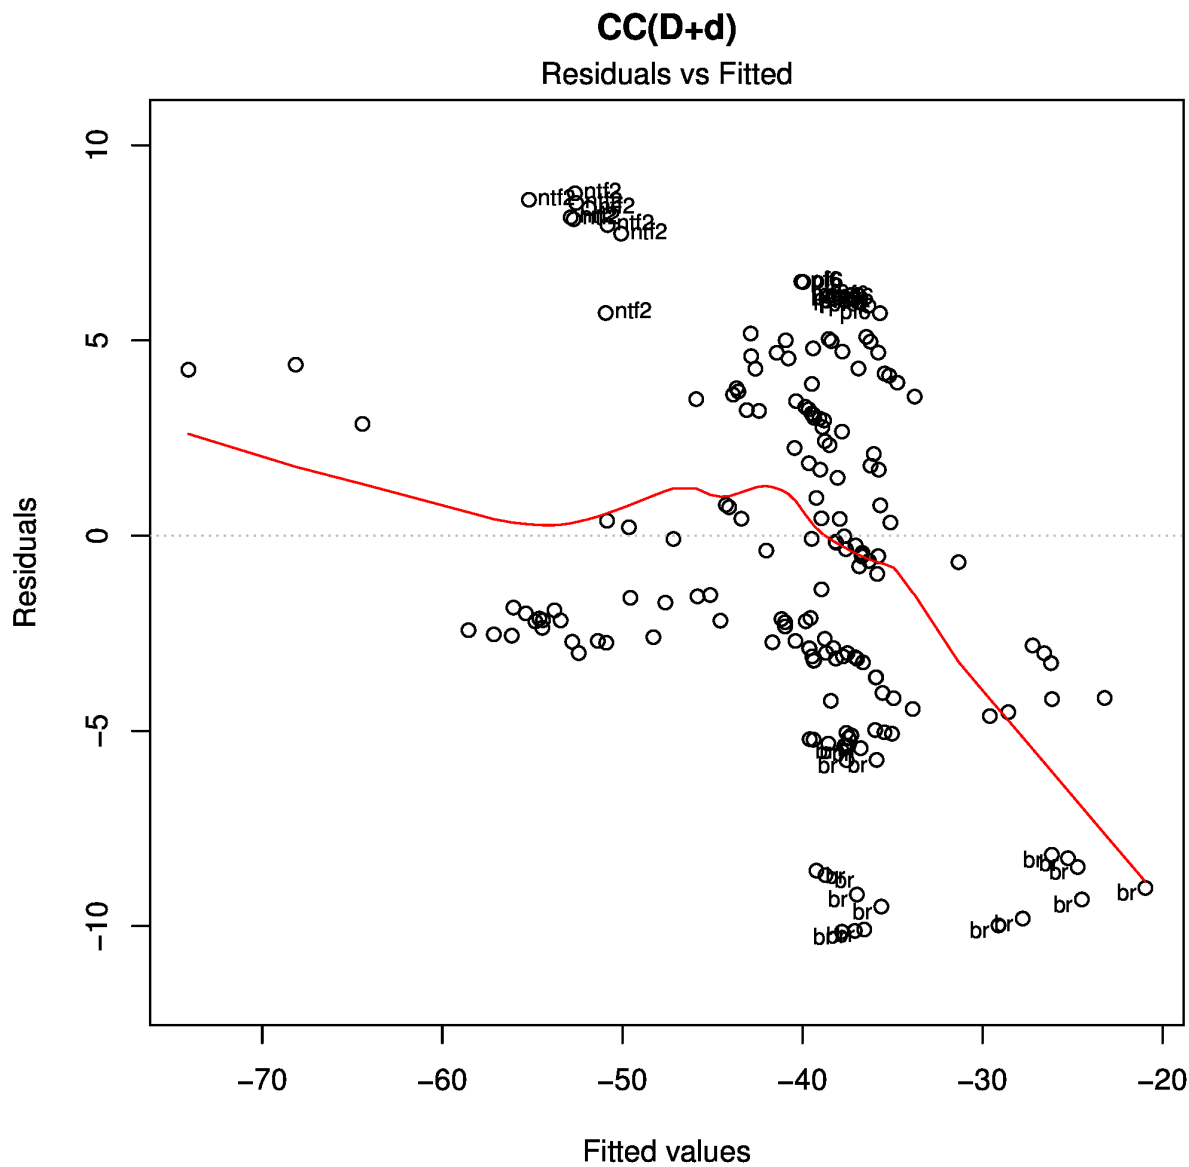

Figure S 129: Residuals vs Fitted values



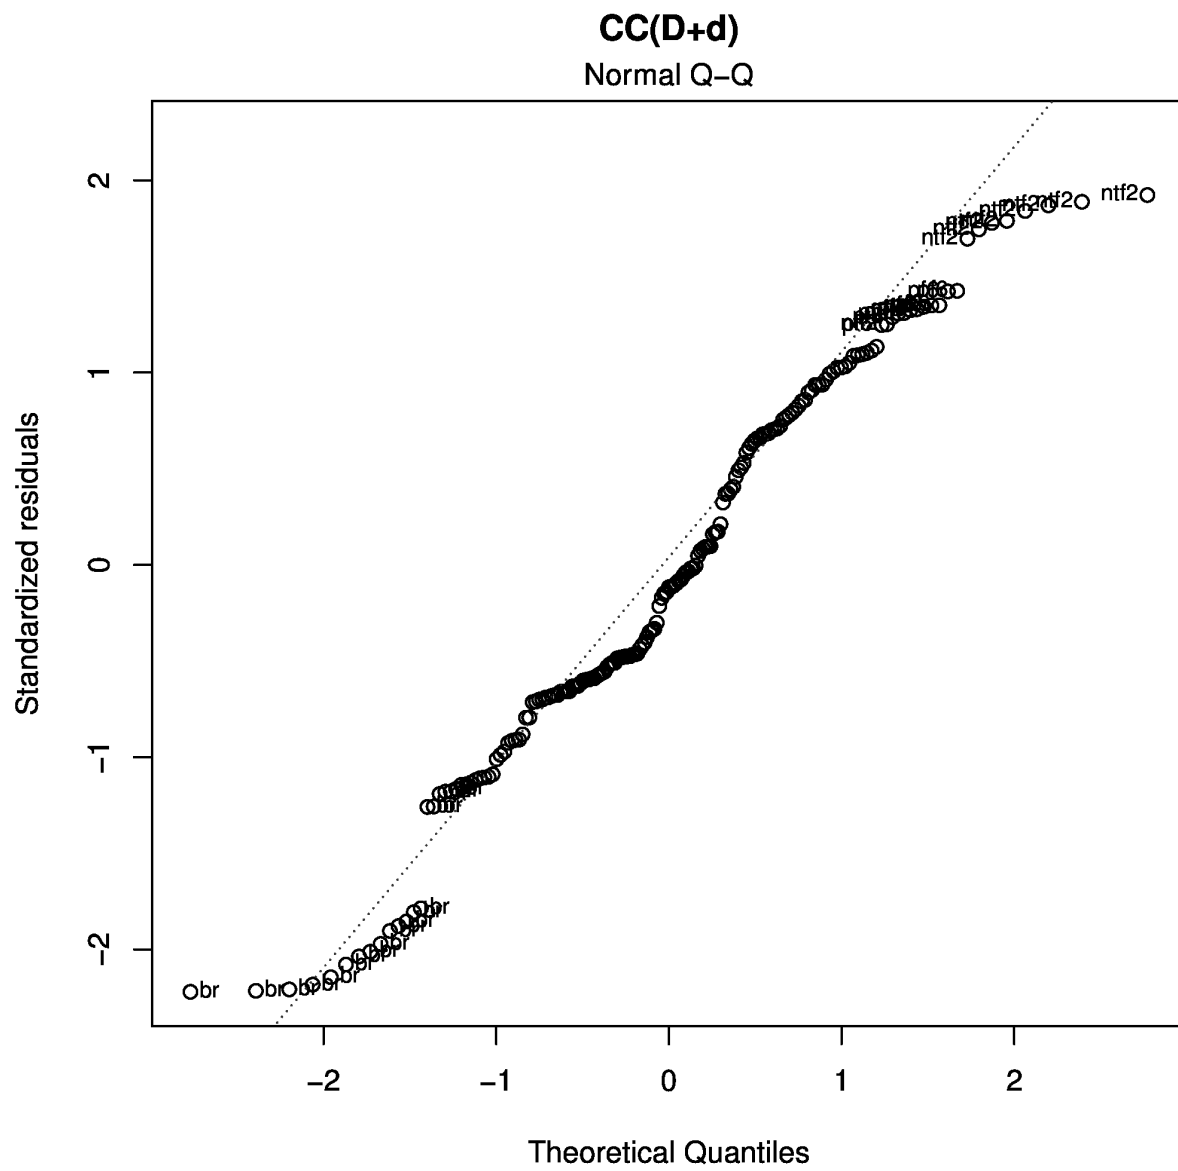

Figure S 130: Q-Q plot



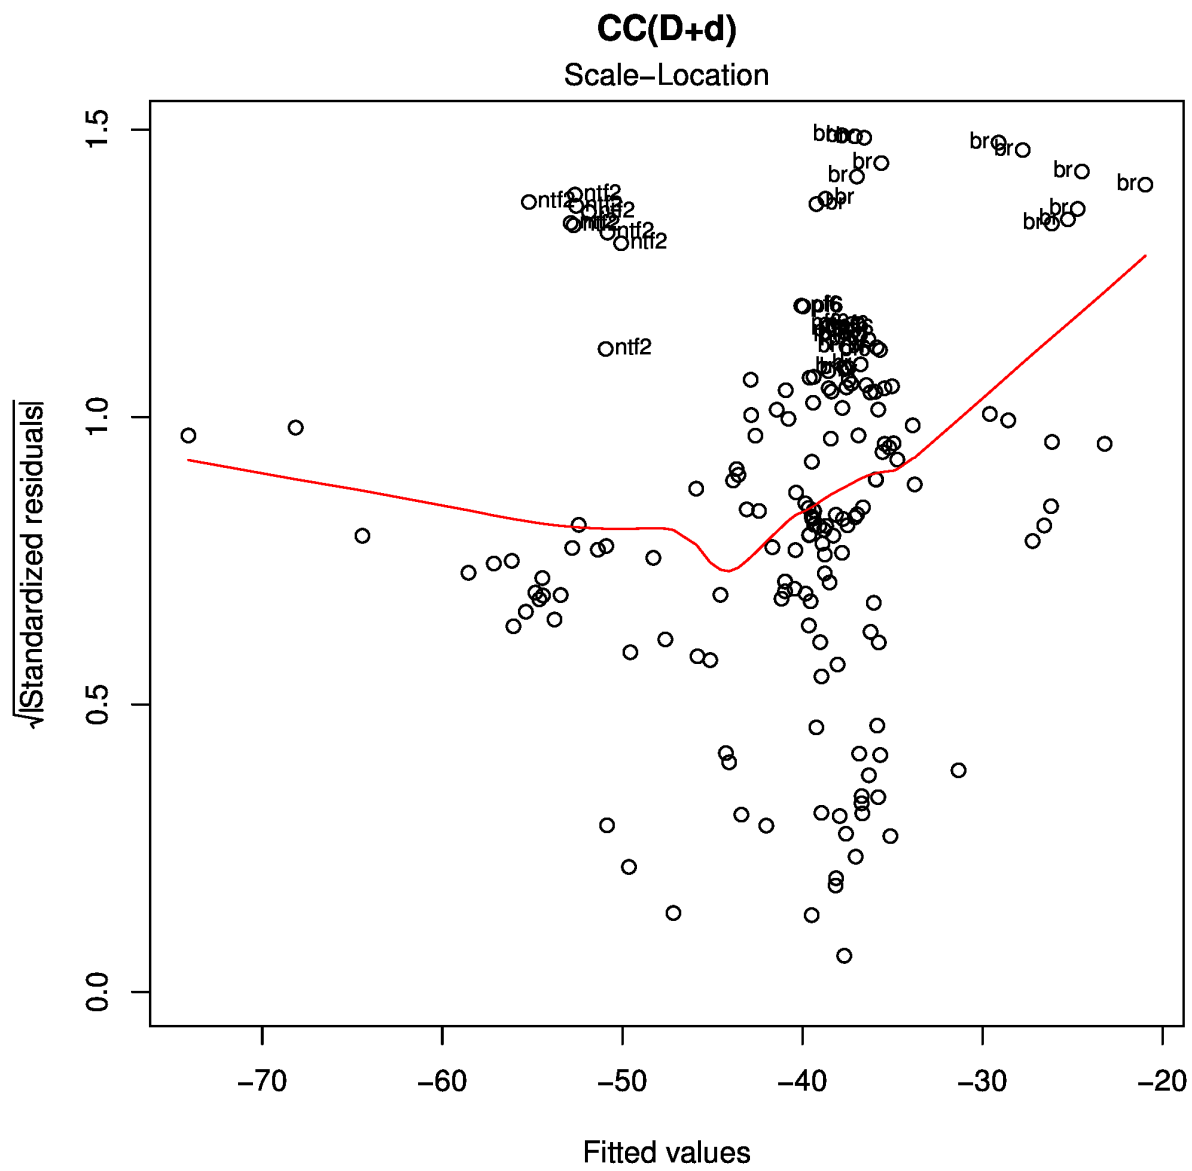

Figure S 131: Scale-Location plot



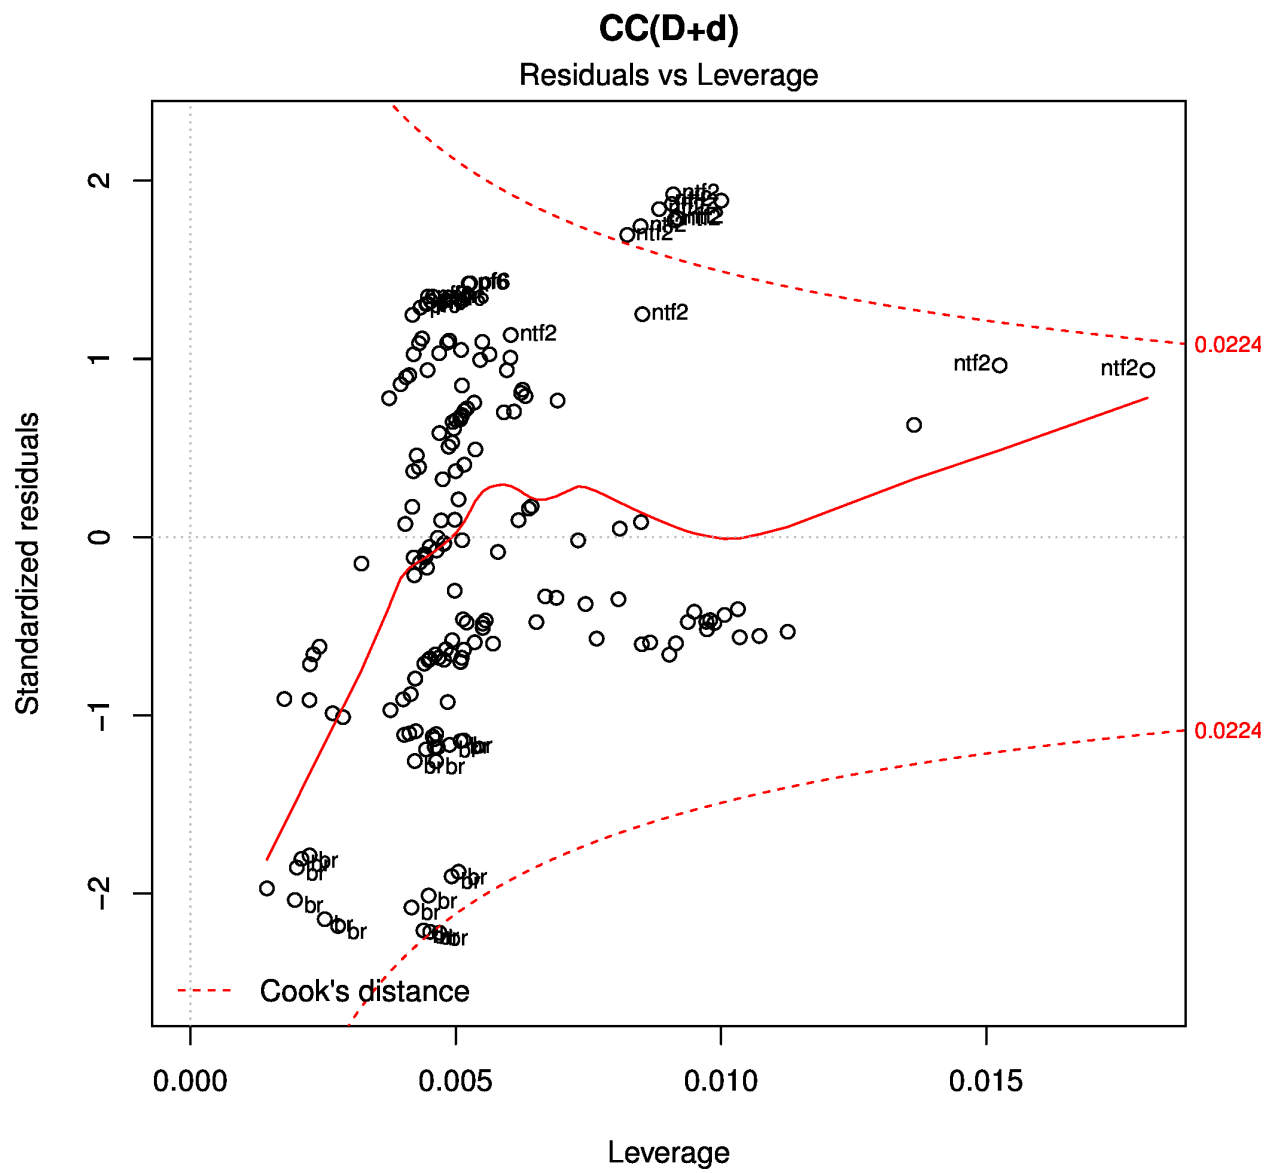

Figure S 132: Residuals vs Leverage plot



### 3.2.15 ACC(D+d) basis set

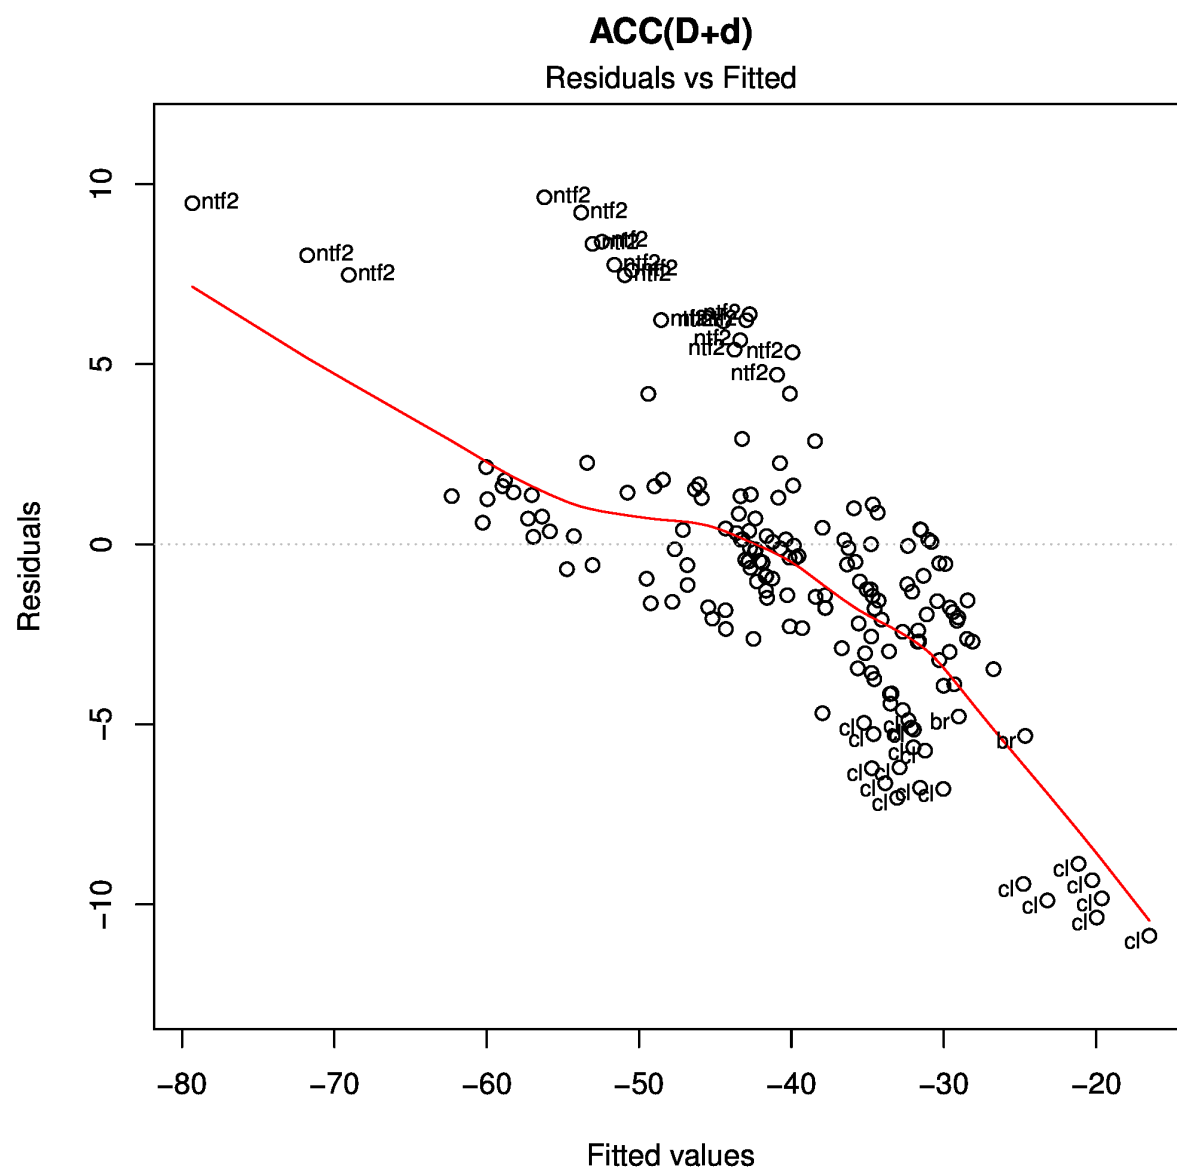

Figure S 133: Residuals vs Fitted values



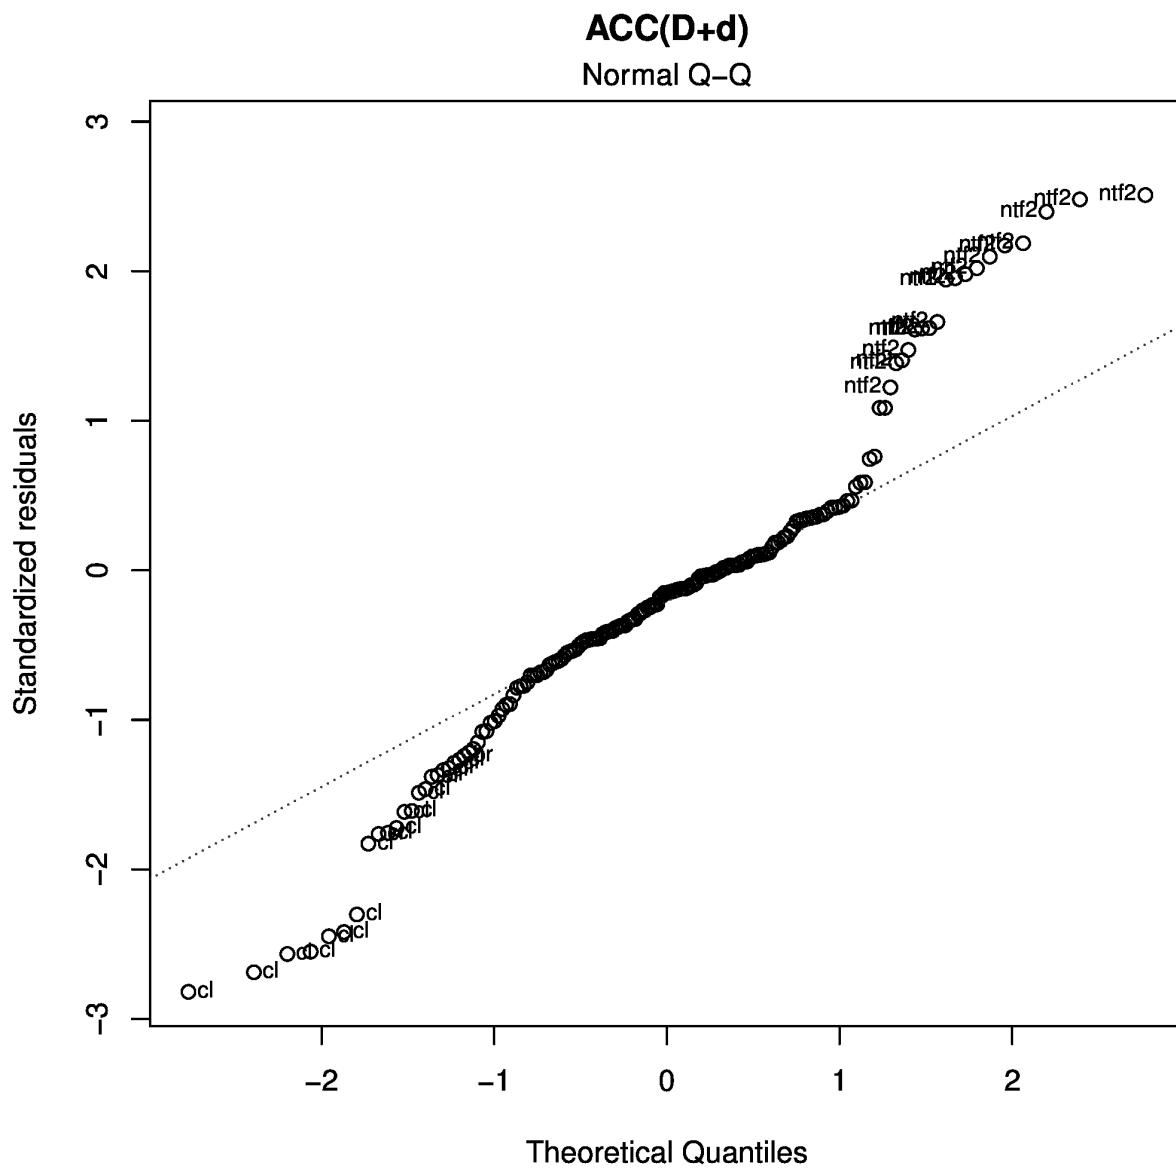

Figure S 134: Q-Q plot



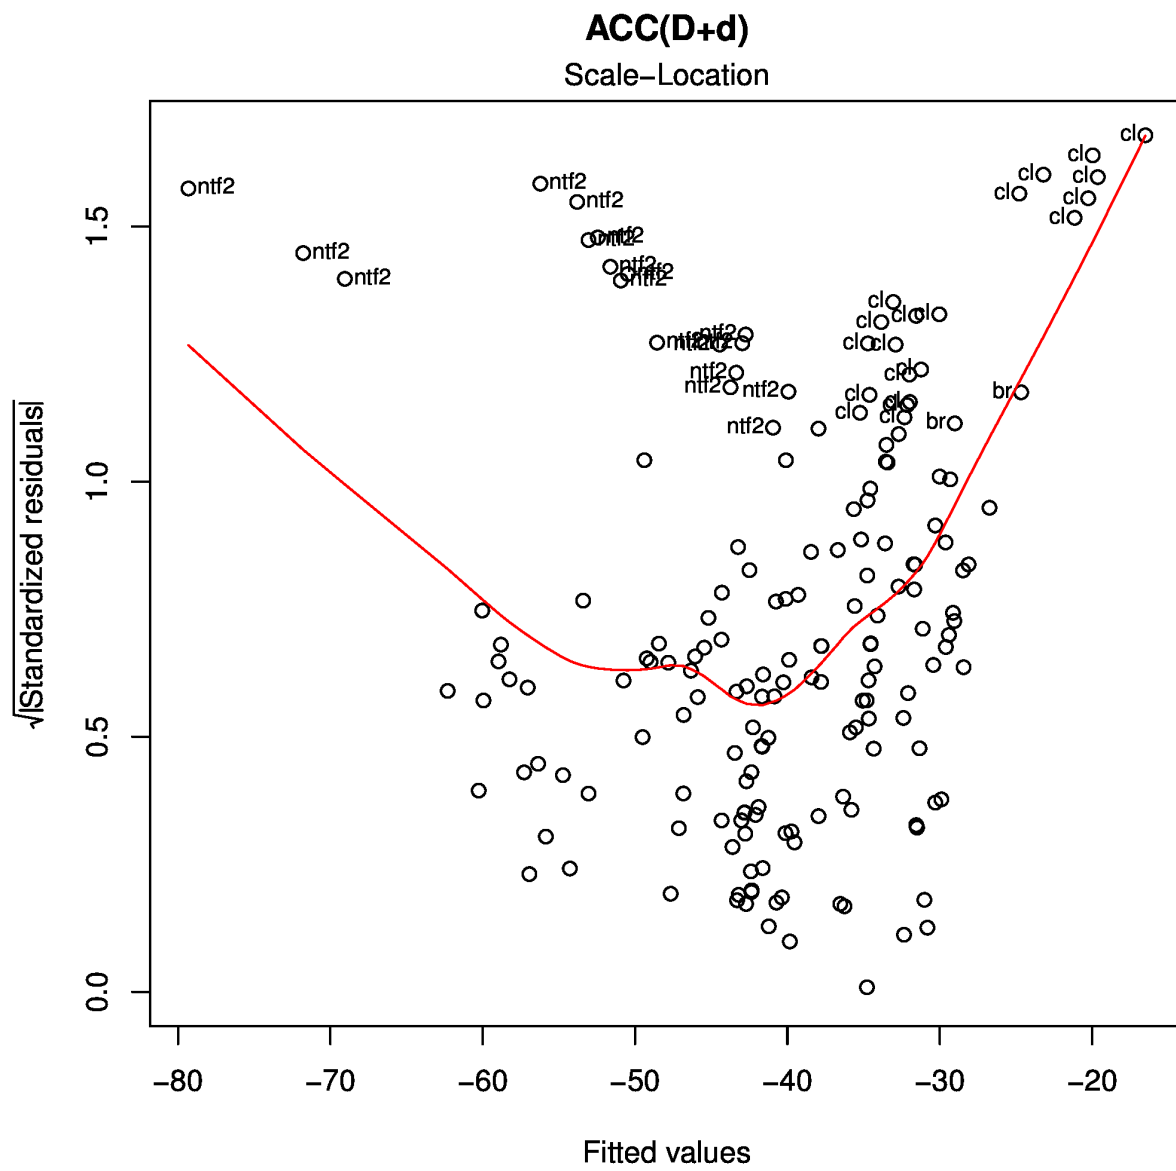

Figure S 135: Scale-Location plot



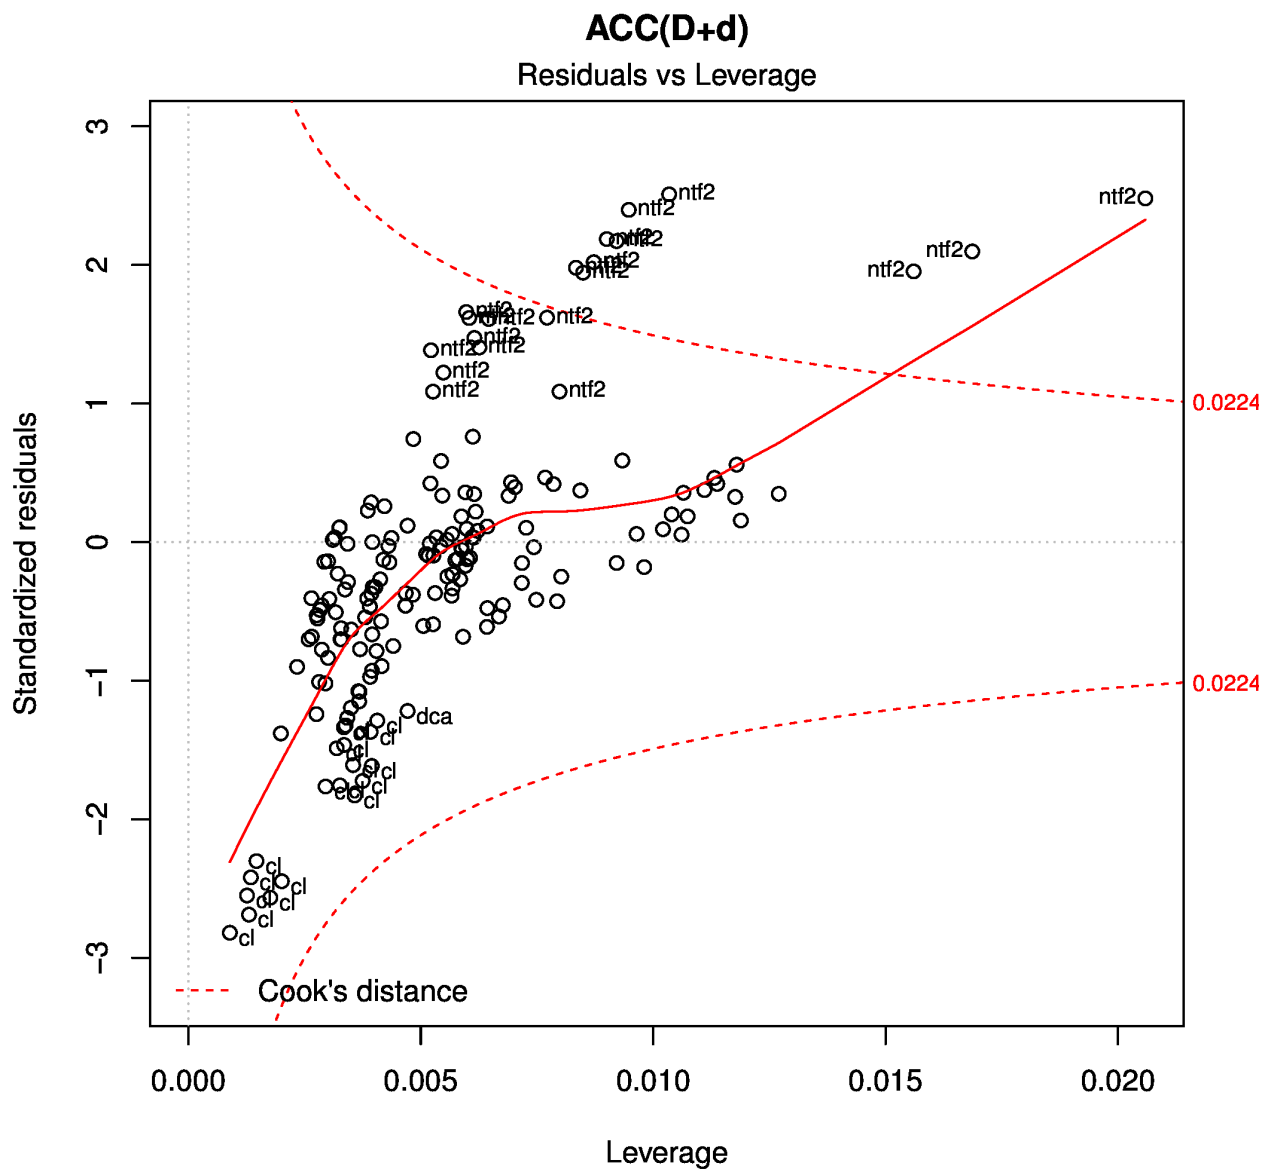

Figure S 136: Residuals vs Leverage plot



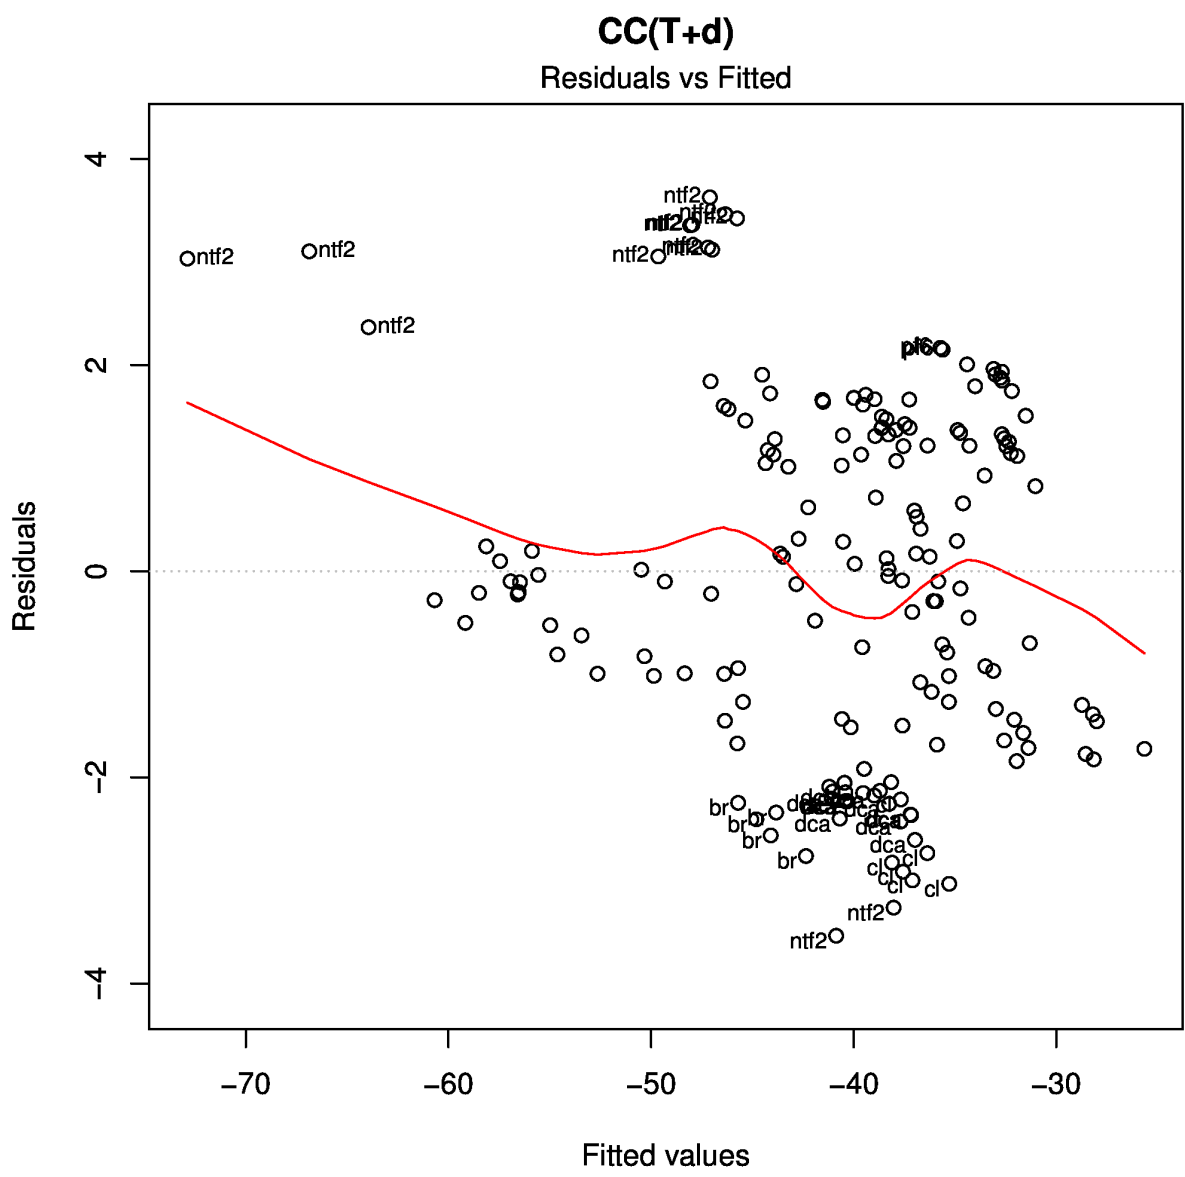

Figure S 137: Residuals vs Fitted values



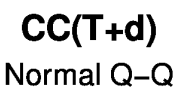

Figure S 138: Q-Q plot



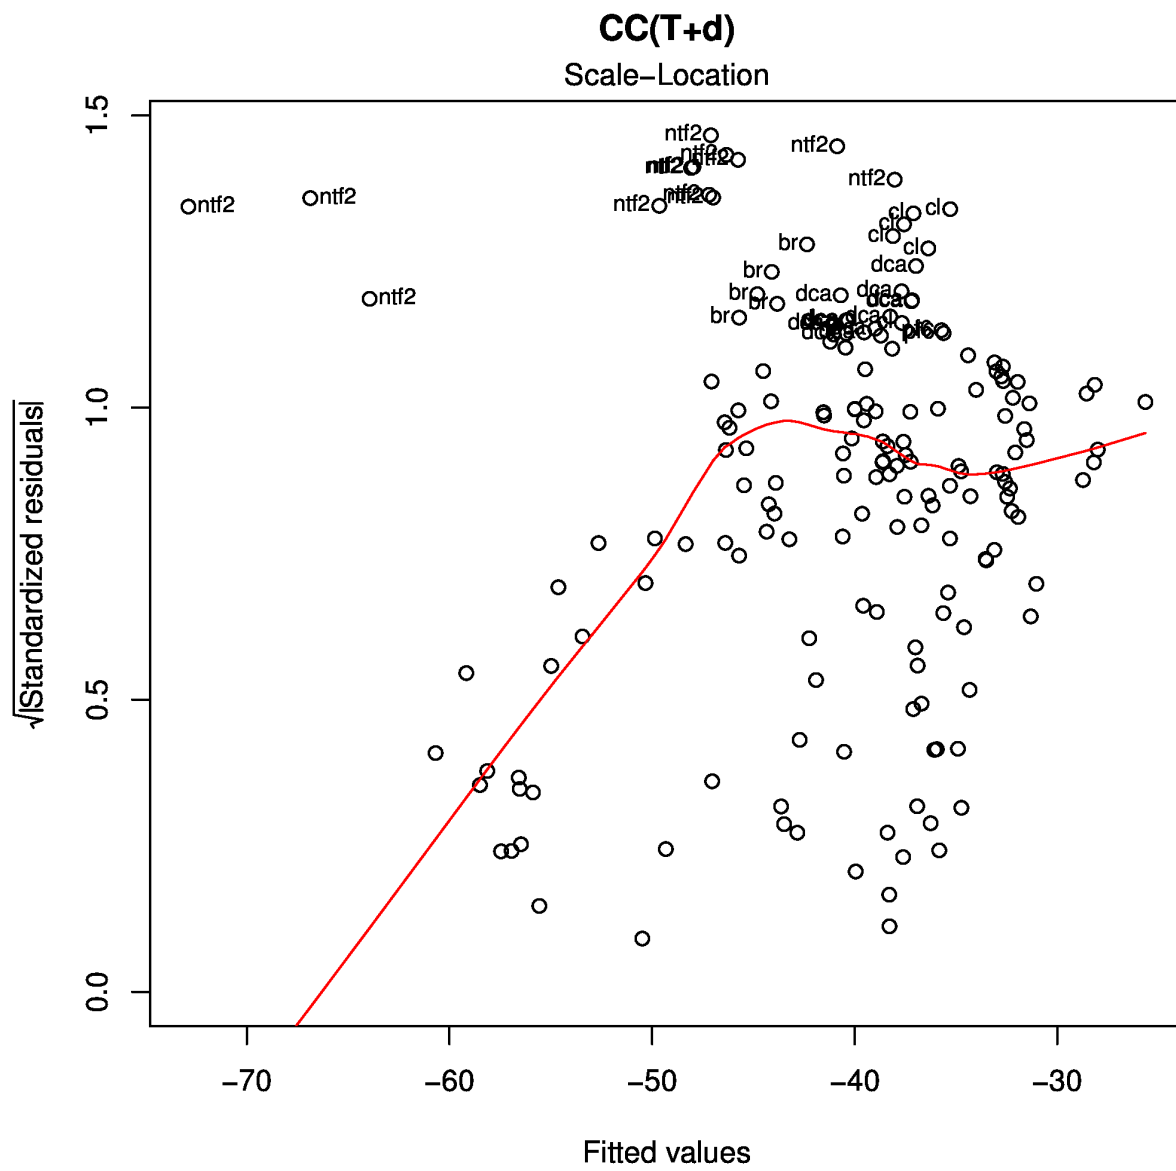

Figure S 139: Scale-Location plot







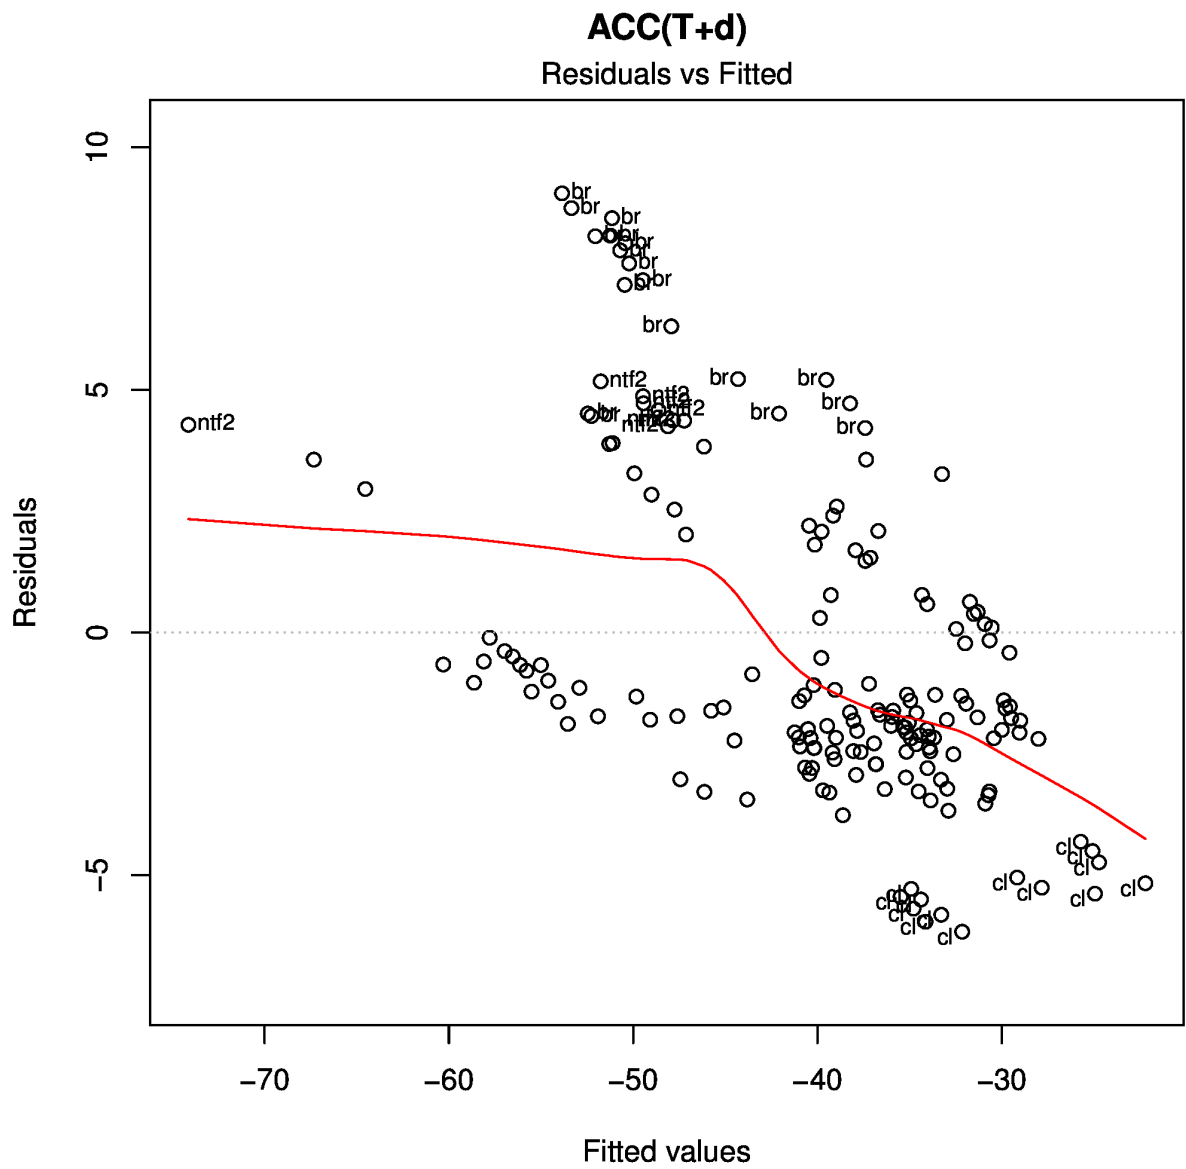

Figure S 141: Residuals vs Fitted values



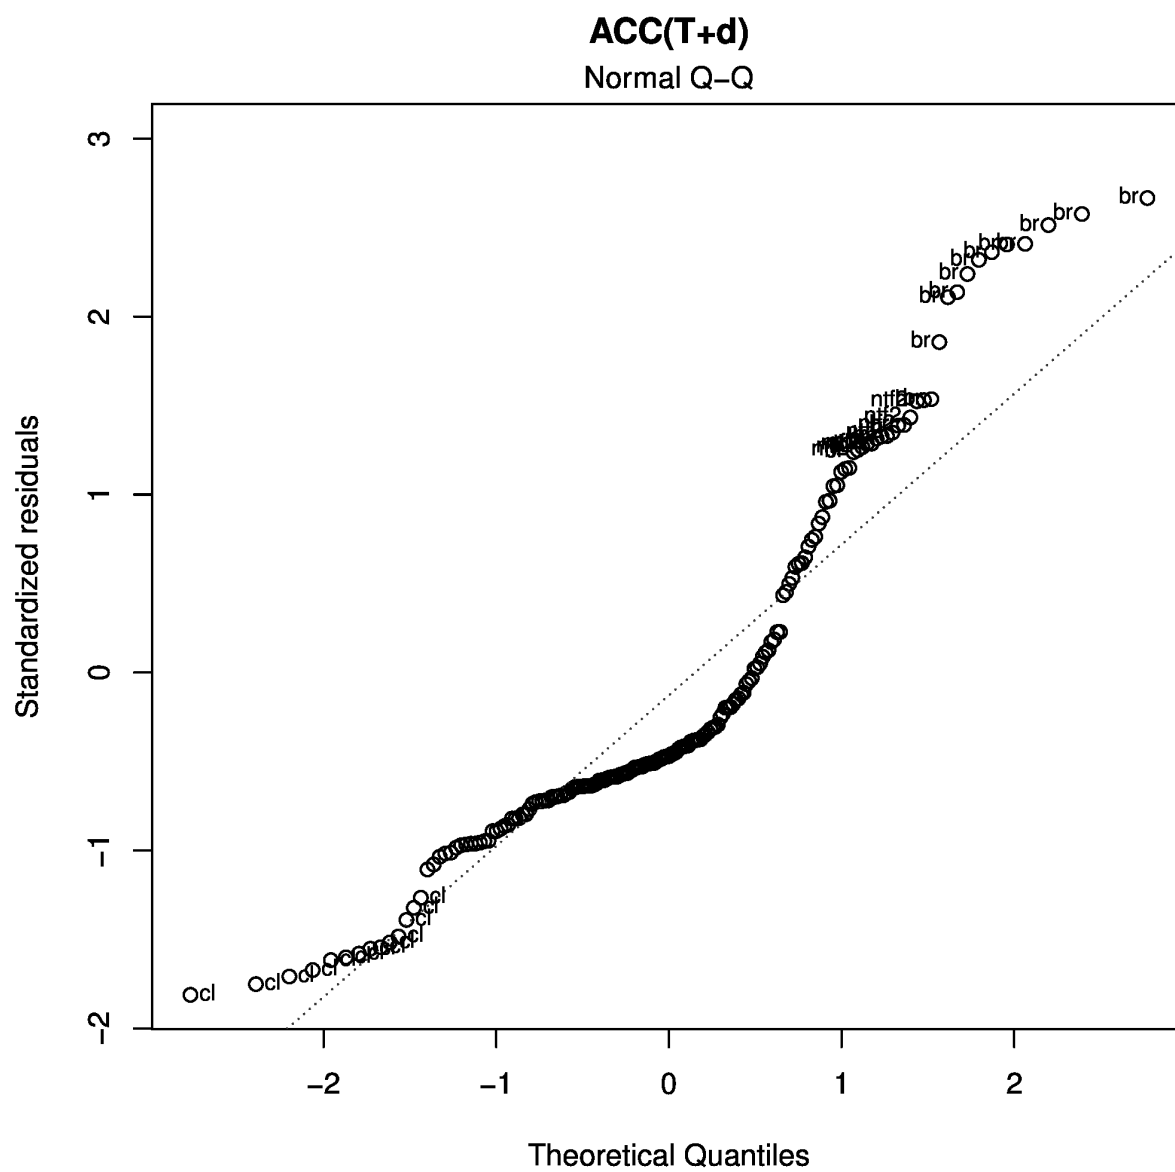

Figure S 142: Q-Q plot



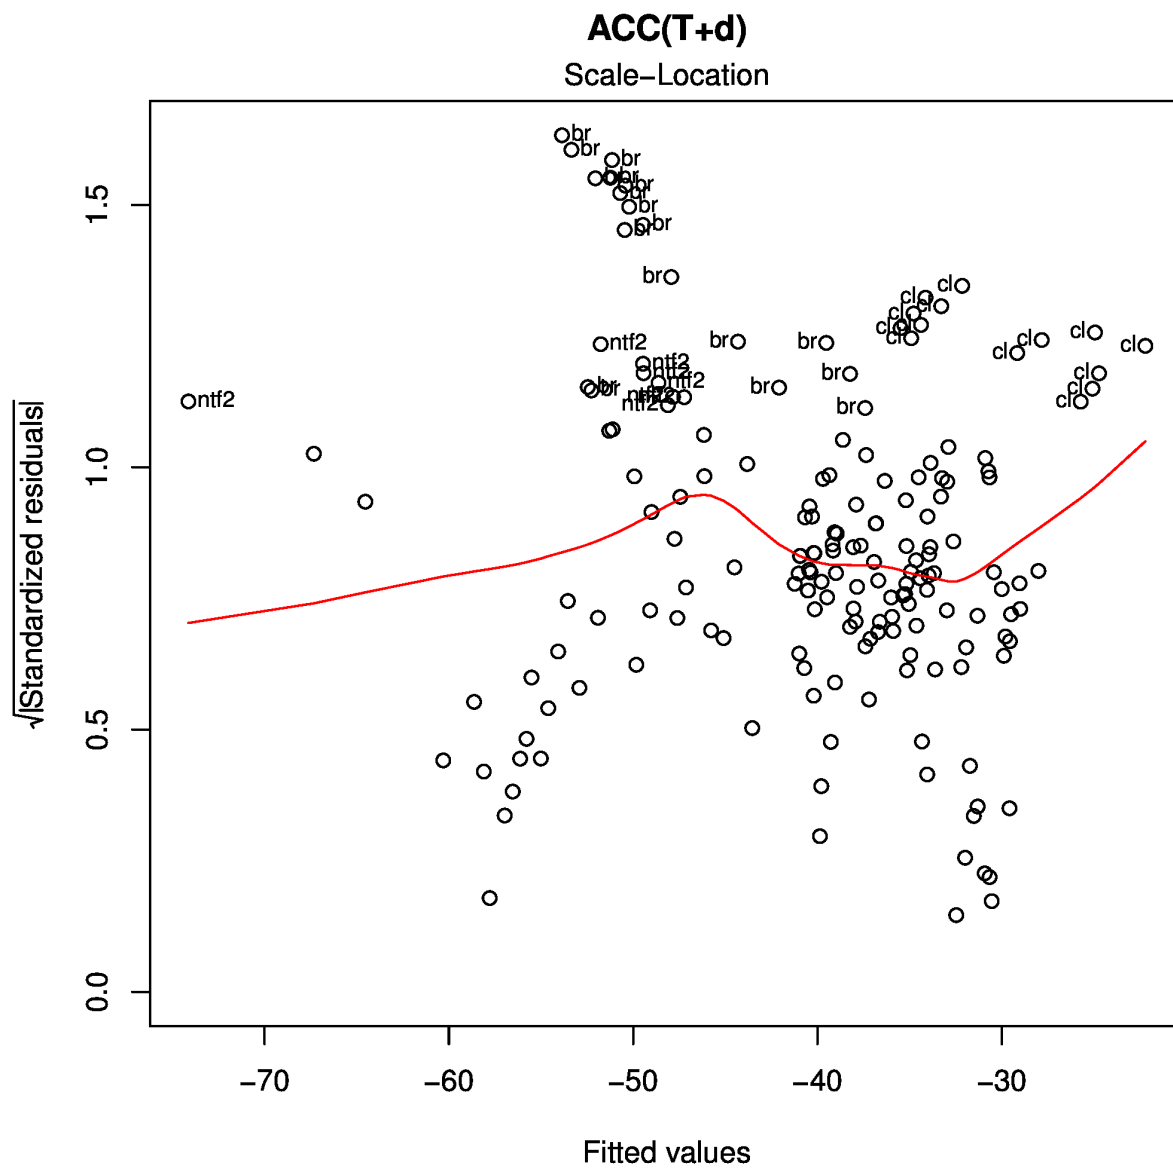

Figure S 143: Scale-Location plot



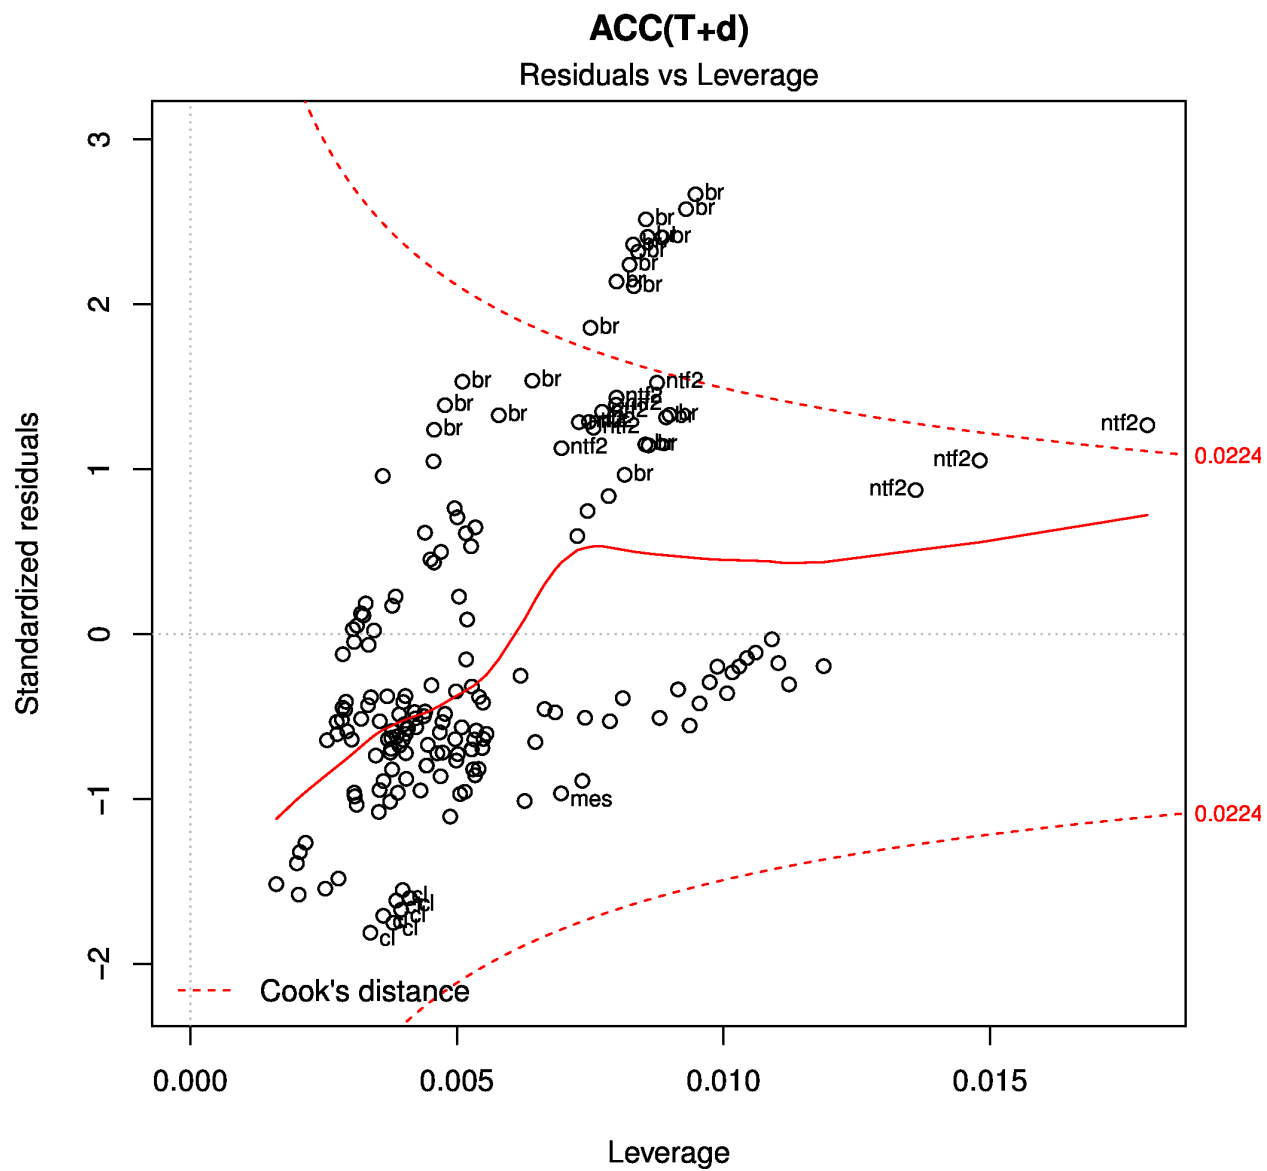

Figure S 144: Residuals vs Leverage plot



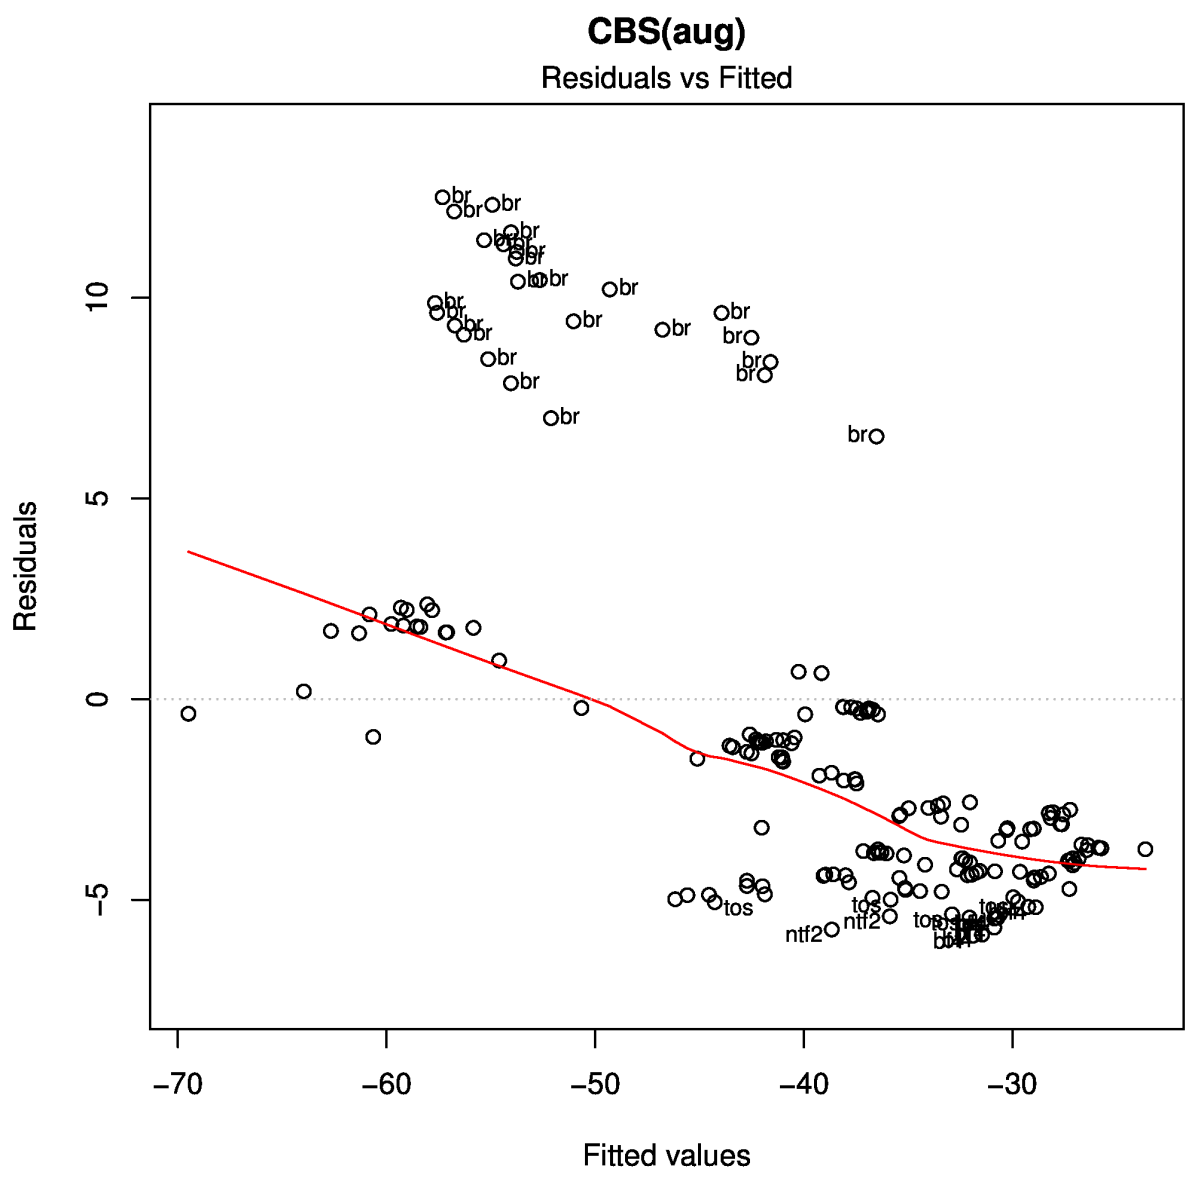

Figure S 145: Residuals vs Fitted values



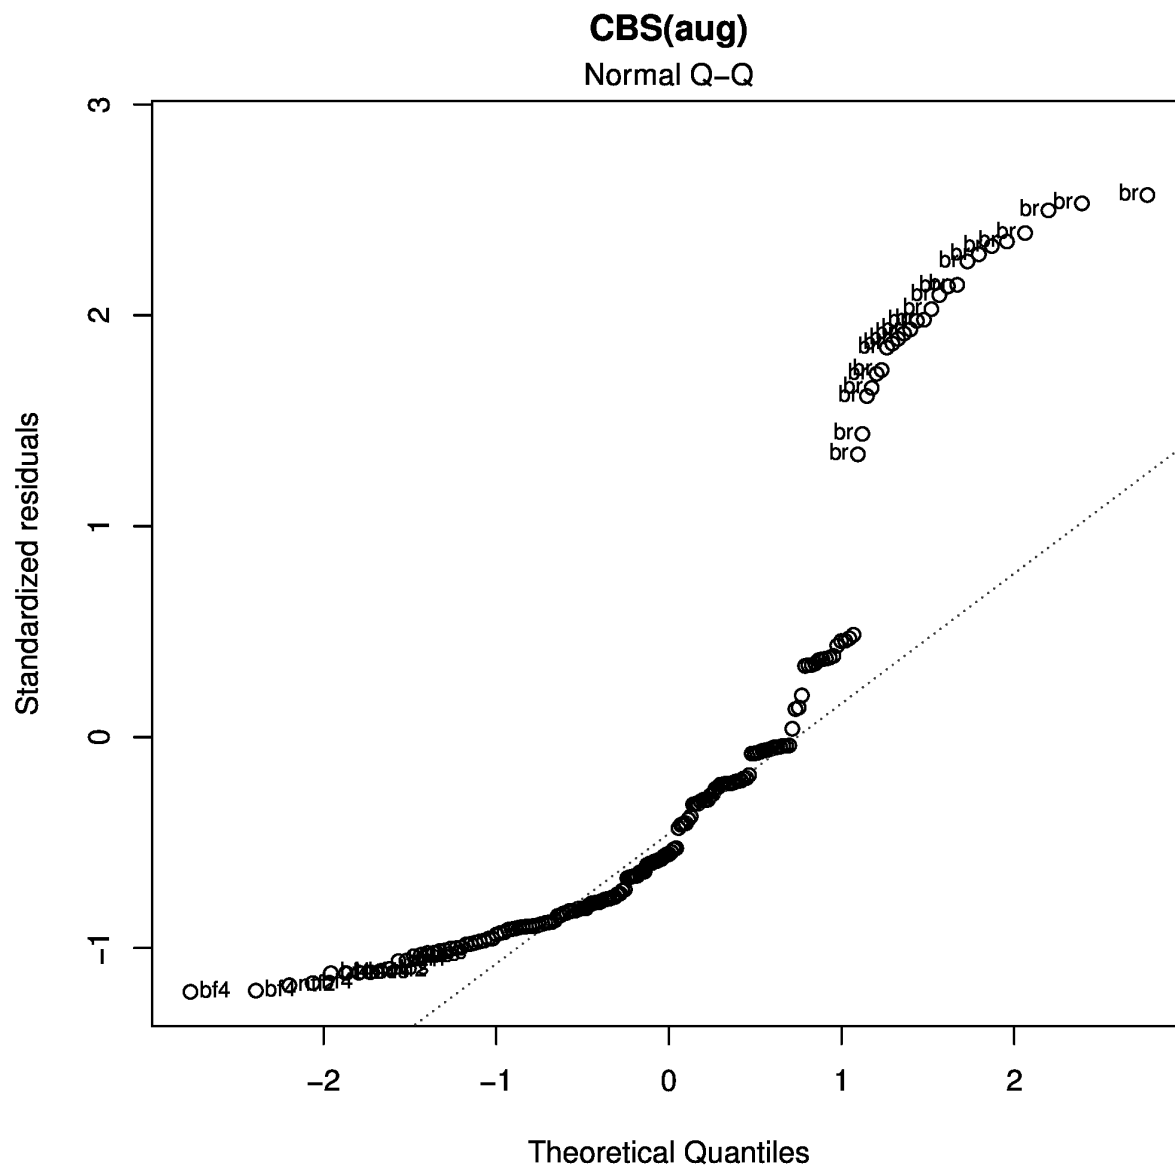

Figure S 146: Q-Q plot



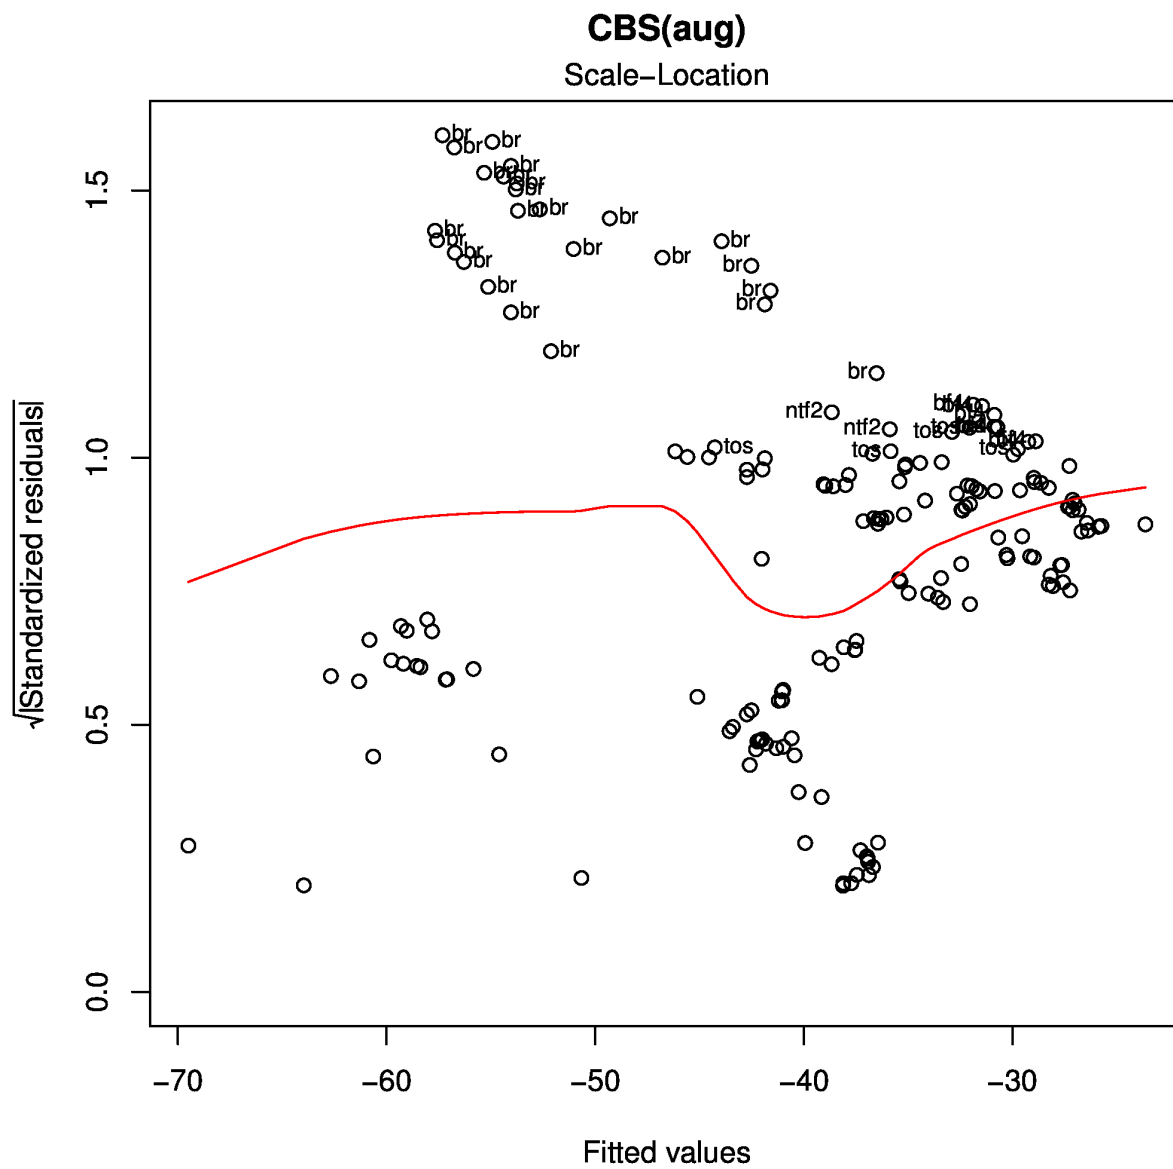

Figure S 147: Scale-Location plot



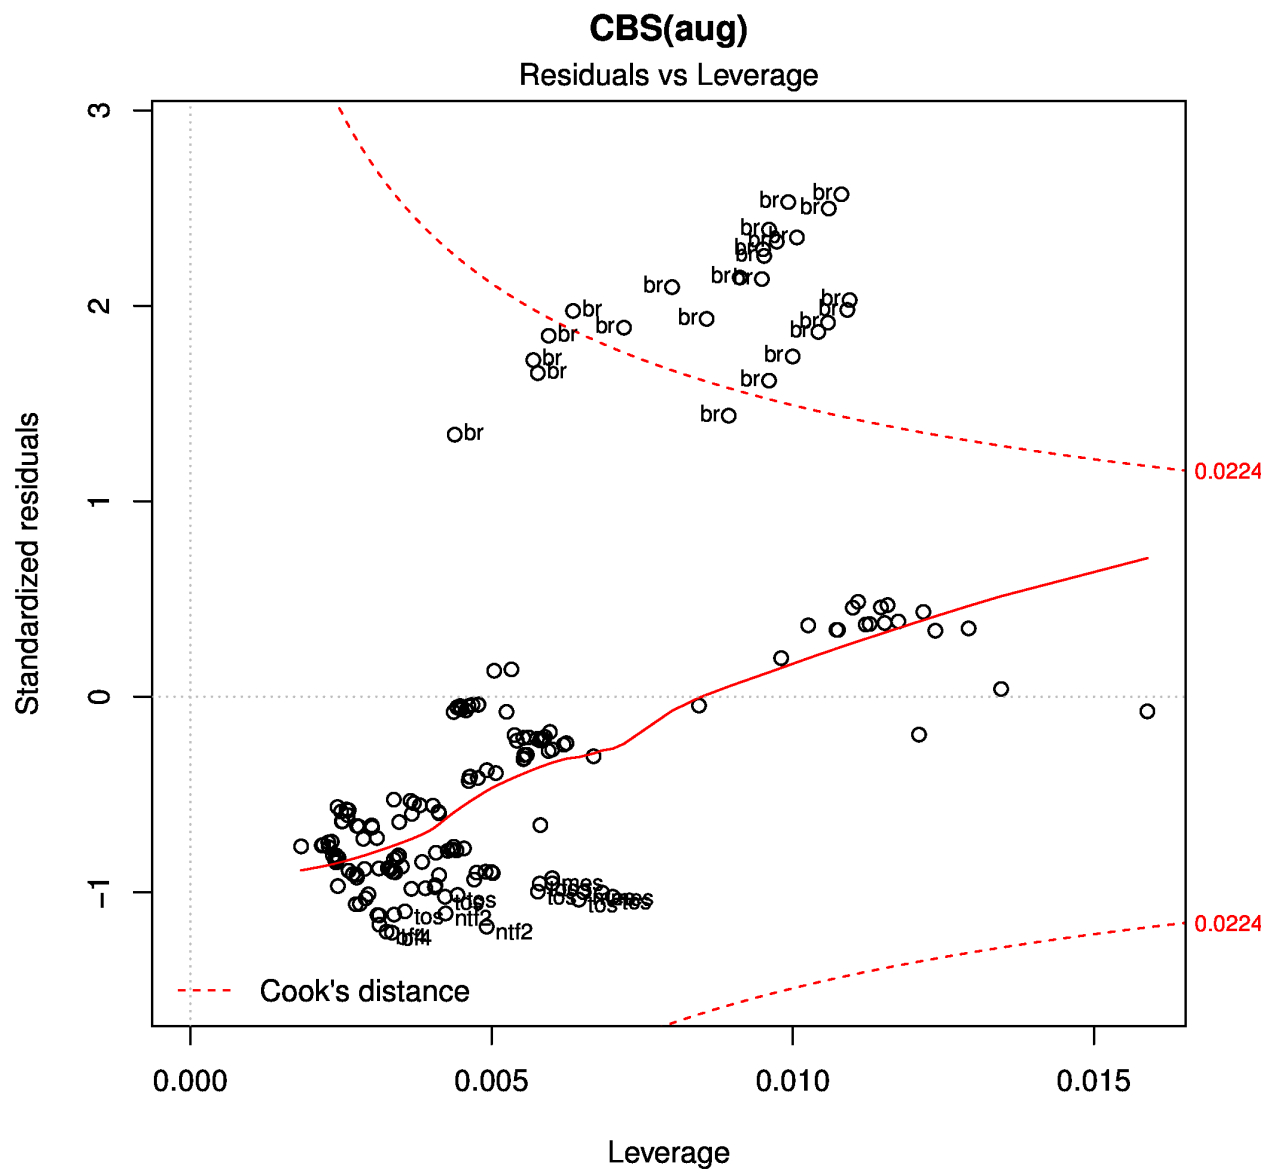

Figure S 148: Residuals vs Leverage plot



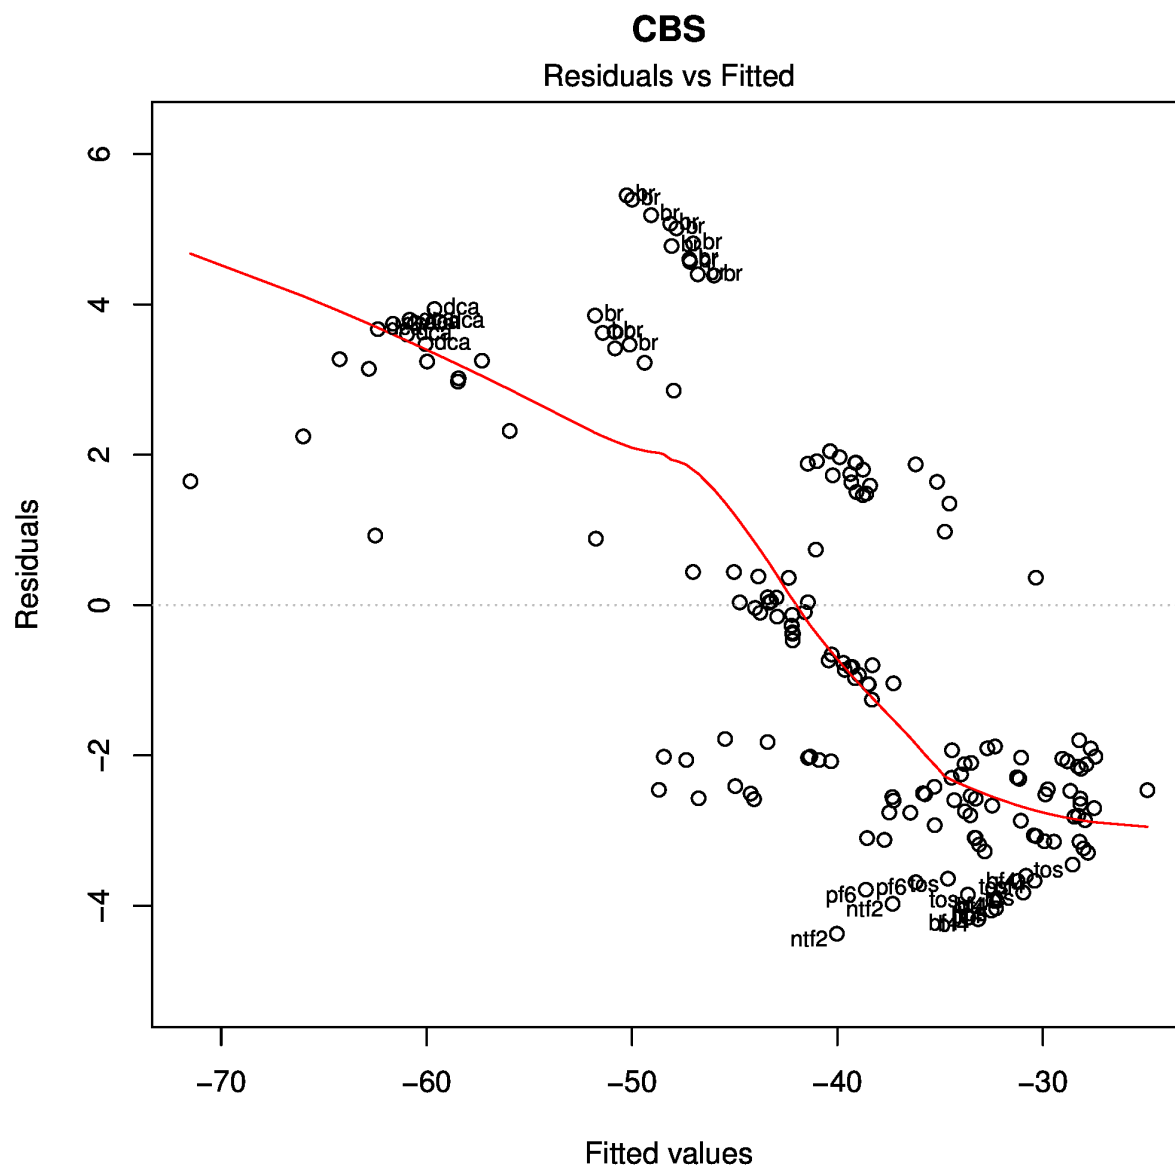

Figure S 149: Residuals vs Fitted values



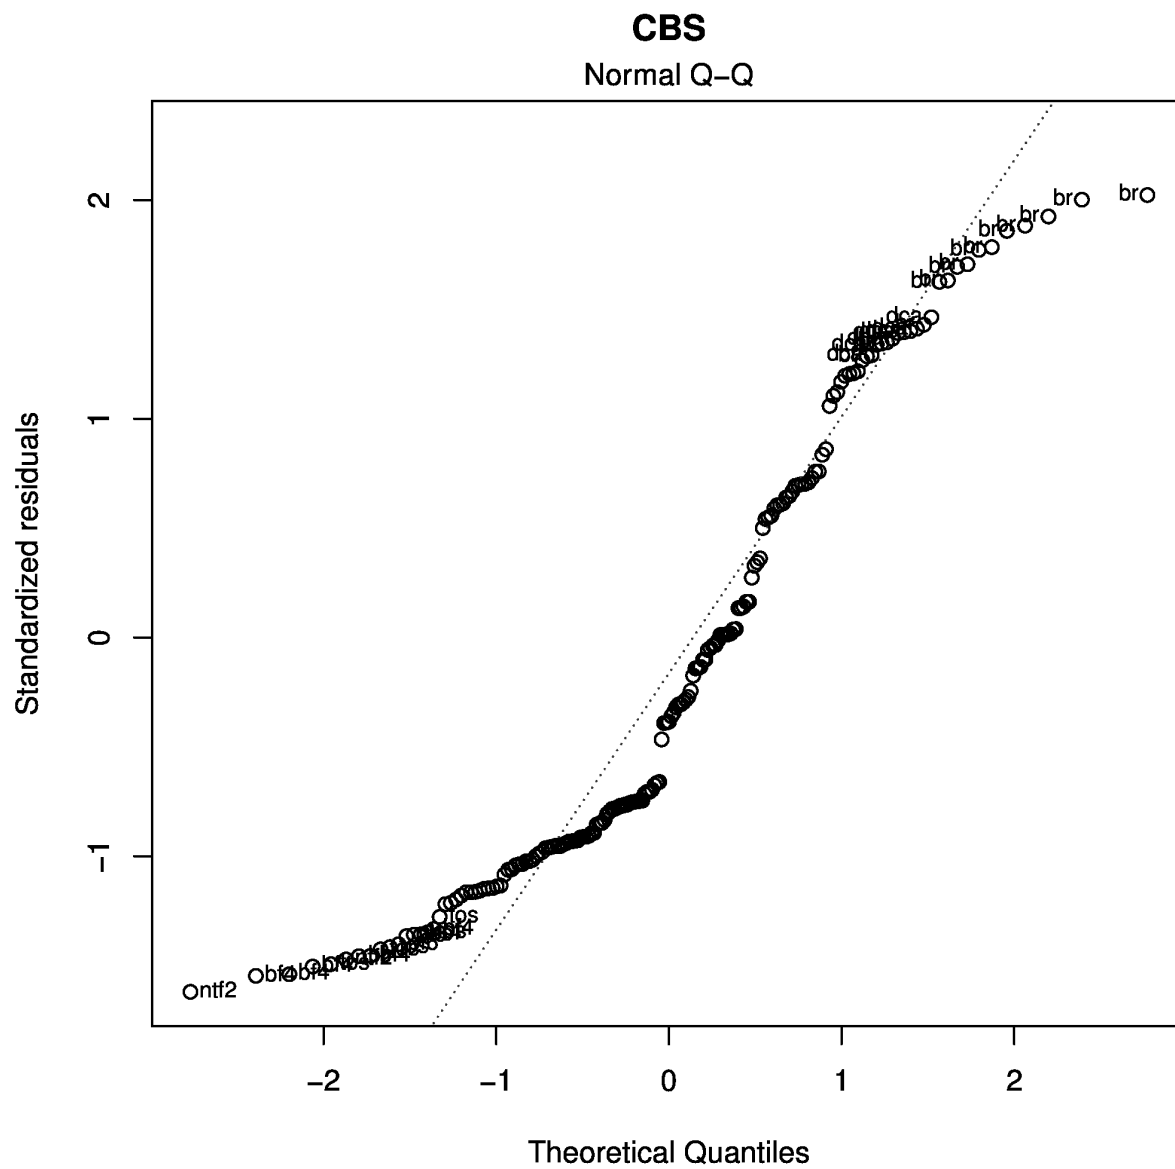

Figure S 150: Q-Q plot







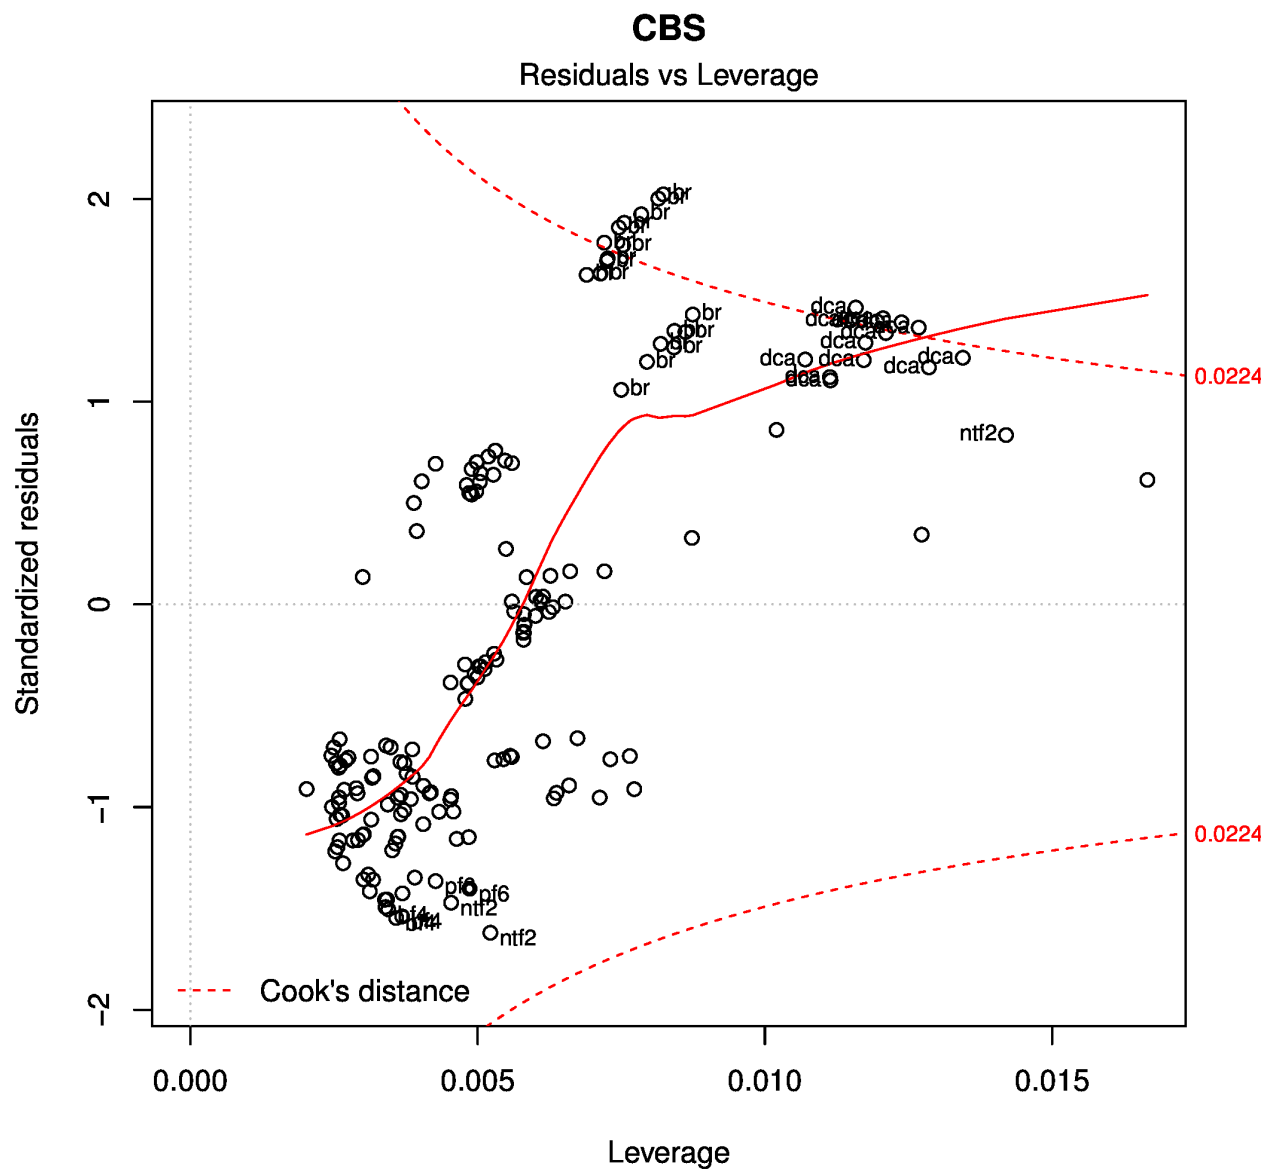

Figure S 152: Residuals vs Leverage plot
